# Supplementary material for: Trialkylphosphonium oxoborates as C(sp3)–H oxyanion holes and their application in catalytic chemoselective acetalization
Source: Royal Society of Chemistry journal article supplement (doi:10.1039/d3sc03081d), 2023-01-01
Supplement: d3sc03081d1.pdf [file d3sc03081d1.pdf]

## Electronic Supplementary Information

# Trialkylphosphonium Oxoborates as C(sp<sup>3</sup>)-H Oxyanion Hole and Their Application in Catalytic Chemoselective Acetalization

Vincent Ming-Yau Leung, Hong-Chai Fabio Wong, Chun-  
Man Pook, Ying-Lung Steve Tse,\* Ying-Yeung Yeung\*

Department of Chemistry and State Key Laboratory of Synthetic Chemistry, The Chinese University of  
Hong Kong, Shatin, NT, Hong Kong

### Table of Contents

|                 |                                                                         |
|-----------------|-------------------------------------------------------------------------|
| <b>S2</b>       | <b>General information</b>                                              |
| <b>S3-S4</b>    | <b>Experimental procedures</b>                                          |
| <b>S5-S26</b>   | <b>Physical data</b>                                                    |
| <b>S27</b>      | <b>Catalyst stability test</b>                                          |
| <b>S28</b>      | <b>Solvent screening and temperature effect on the chemoselectivity</b> |
| <b>S29</b>      | <b>NMR titration experiment with TOB-1 and benzyl alcohol</b>           |
| <b>S30</b>      | <b>Comparison of the chemical shift of alcohols and thiols</b>          |
| <b>S31-S37</b>  | <b>X-ray crystal data of TOB-2</b>                                      |
| <b>S38-S41</b>  | <b>Kinetic study of the acetalization reaction</b>                      |
| <b>S42-S65</b>  | <b>Computational studies</b>                                            |
| <b>S66</b>      | <b>References</b>                                                       |
| <b>S67-S211</b> | <b>NMR spectra</b>                                                      |

## 1. General information

Commercially available reagents were used as received. The solvents were dried over a solvent purification system from Innovative Technology. Nuclear magnetic resonance (NMR) spectra were recorded on a Bruker AMX500 (500 MHz) spectrometer or a Bruker AMX400 (400 MHz) spectrometer, in CDCl<sub>3</sub> solutions, unless stated otherwise. All chemical shifts were recorded in ppm downfield from tetramethylsilane (stated otherwise). All chemical shifts were recorded at  $\delta = 7.26$  or carbon signals in NMR solvent (CDCl<sub>3</sub> at  $\delta = 77.16$ ). Spin-spin coupling constants (J value) recorded in Hz were measured directly from the spectra. High resolution mass spectra were obtained on a Thermo Q Exactive Focus Orbitrap with ionization mode Electrospray Ionization (Positive) or Atmospheric-pressure Chemical Ionization at the Department of Chemistry, The Chinese University of Hong Kong, Hong Kong Special Administrative Region. Analytical thin layer chromatography (TLC) was performed with Merck pre-coated TLC plates, silica gel 60F-254, layer thickness 0.25 mm. Flash chromatography separations were performed on Merck 60 (0.040-0.063 mm) mesh silica gel.

## 2. Experimental procedures

### (i) Preparation of catalyst

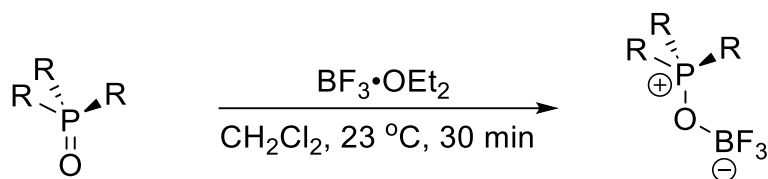

**1a**, R = Me

**1b**, R = cyclohexyl

**1c**, R = Ph

**TOB-1**, R = Me (84%)

**TOB-2**, R = cyclohexyl (91%)

**TOB-3**, R = Ph (95%)

General procedure: To a round bottom flask equipped with a magnetic stirrer bar was added trialkylphosphine oxide **1** (2 mmol) and anhydrous CH<sub>2</sub>Cl<sub>2</sub> (1 mL) at 23 °C under inert atmosphere. Boron trifluoride diethyl etherate (0.54 mL, 4 mmol, 2 equiv) was added dropwise using syringe and the resultant mixture was stirred for 30 minutes. Next, diethyl ether was added, and white precipitate was formed. The solution was filtered, and the residue was washed with diethyl ether (5 mL). The residue was dried under high vacuum to give the **TOB** catalyst.

### (ii) TOB-catalyzed acetalization reaction

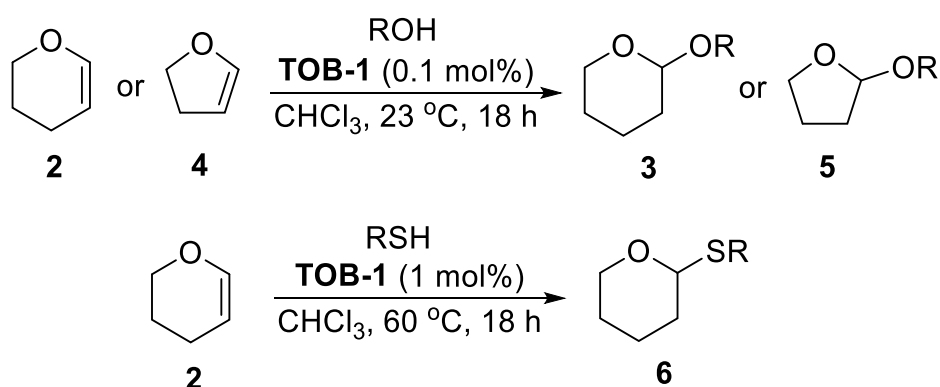

General procedure: To a solution of alcohol or thiol (0.2 mmol, 1 equiv) and **TOB-1** (0.2 μmol, 0.1 mol%) in CHCl<sub>3</sub> (0.4 mL) was added 3,4-dihydro-2H-pyran (**2**) (21.9 μL, 0.24 mmol, 1.2 equiv) or 2,3-dihydrofuran (**4**) (18.1 μL, 0.24 mmol, 2 equiv) into a vial (or a resealable tube for reactions at 60 °C). The reaction was stirred at 23 °C (or 60 °C) for 18 hours (or otherwise specified). The solution was concentrated under reduced pressure and the residue was purified by flash column chromatography eluted with hexanes/Et<sub>2</sub>O (90:10) to give the desired acetal product.

(iii) Scale-up reaction

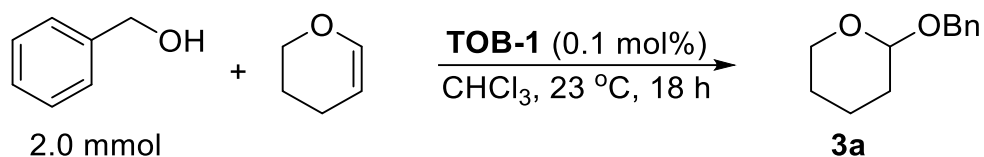

To a solution of benzyl alcohol (207  $\mu$ L, 2.0 mmol, 1 equiv) and **TOB-1** (2.0  $\mu$ mol, 0.1 mol%) in  $\text{CHCl}_3$  (4.0 mL) was added 3,4-dihydropyran **2** (219  $\mu$ L, 2.4 mmol, 1.2 equiv). The reaction was stirred at 23  $^\circ\text{C}$  for 18 hours. The solution was concentrated under reduced pressure and the residue was purified by flash column chromatography eluted with hexanes/ $\text{Et}_2\text{O}$  = 90:10 to give the desired acetal product **3a** (0.31 g, 1.63 mmol, 81% yield).

(iv) O/S Chemoselective acetalization

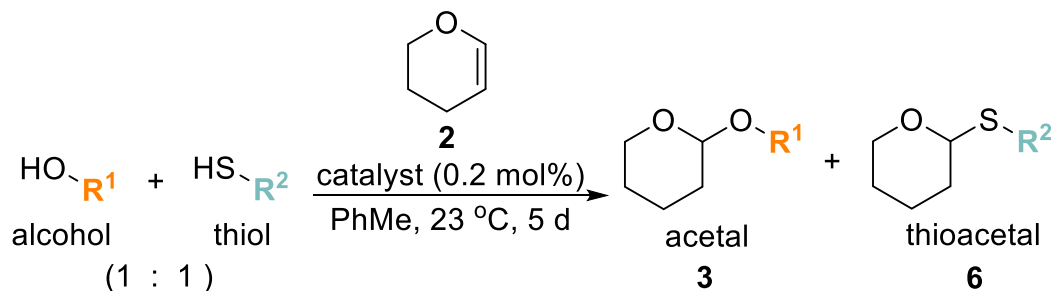

To a solution of alcohol (0.2 mmol, 1 equiv), thiol (0.2 mmol, 1 equiv) and **TOB-1** (0.4  $\mu$ mol, 0.2 mol%) in toluene (0.4 mL) was added 3,4-dihydro-2H-pyran (**2**) (18.1  $\mu$ L, 0.2 mmol, 1 equiv) into a vial. The reaction was stirred at 23  $^\circ\text{C}$  for 5 days. The reaction mixture was then filtered through a thin plug of silica gel column and the filtrate was concentrated under reduced pressure. The reaction yield and ratio were determined using NMR with dibromomethane (14.0  $\mu$ L, 0.2 mmol, 1 equiv) as the internal standard.

### 3. Physical data

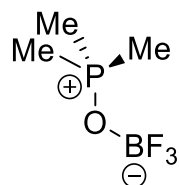

#### TOB-1

84% yield. White solid. mp 154.7-156.1 °C.  $^1\text{H}$  NMR (500 MHz,  $\text{CDCl}_3$ ):  $\delta$  1.89 (d,  $J = 13.5$  Hz, 9H).  $^{13}\text{C}$  NMR (125 MHz,  $\text{CDCl}_3$ ):  $\delta$  14.8 (d,  $J = 71.3$  Hz).  $^{11}\text{B}$  NMR (160 MHz,  $\text{CDCl}_3$ ):  $\delta$  -0.93.  $^{19}\text{F}$  NMR (470 MHz,  $\text{CDCl}_3$ ):  $\delta$  -146.0 (s, 3F).  $^{31}\text{P}$  NMR (200 MHz,  $\text{CDCl}_3$ ):  $\delta$  67.9 (m). FTICR MS (APCI) calcd for  $[\text{C}_3\text{H}_9\text{BF}_3\text{OP} + \text{Cl}]^-$ : 195.01308, found: 195.01285.

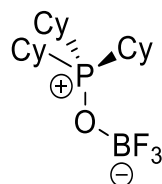

#### TOB-2

91% yield. White solid. mp 204.2-206.9 °C.  $^1\text{H}$  NMR (400 MHz,  $\text{CDCl}_3$ ):  $\delta$  2.23 (qt,  $J = 12.5$  Hz, 2.7 Hz, 3H), 2.00-1.97 (m, 6H), 1.93-1.88 (m, 6H), 1.78 (m, 3H), 1.60-1.51 (m, 6H), 1.36-1.23 (m, 9H).  $^{13}\text{C}$  NMR (125 MHz,  $\text{CDCl}_3$ ):  $\delta$  34.1, 33.6, 26.7 (d,  $J = 12.5$  Hz), 25.8 (d,  $J = 11.3$  Hz).  $^{11}\text{B}$  NMR (160 MHz,  $\text{CDCl}_3$ ):  $\delta$  -1.03.  $^{19}\text{F}$  NMR (470 MHz,  $\text{CDCl}_3$ ):  $\delta$  -145.9 (s, 3F).  $^{31}\text{P}$  NMR (200 MHz,  $\text{CDCl}_3$ ):  $\delta$  70.1 (m). FTICR MS (APCI) calcd for  $[\text{C}_{18}\text{H}_{33}\text{BF}_3\text{OP} + \text{Cl}]^-$ : 399.20115, found: 399.20146.

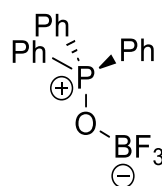

#### TOB-3<sup>1</sup>

95% yield. White solid. mp 243.5-244.3 °C.  $^1\text{H}$  NMR (500 MHz,  $\text{CDCl}_3$ ):  $\delta$  7.77-7.70 (m, 9H), 7.60-7.56 (m, 6H).  $^{13}\text{C}$  NMR (125 MHz,  $\text{CDCl}_3$ ):  $\delta$  134.4 (d,  $J = 2.7$  Hz), 133.2 (d,  $J = 11.7$  Hz), 129.4 (d,  $J = 13.3$  Hz), 124.9 (d,  $J = 111.6$  Hz).  $^{11}\text{B}$  NMR (160 MHz,  $\text{CDCl}_3$ ):  $\delta$  -0.46.  $^{19}\text{F}$  NMR (470 MHz,  $\text{CDCl}_3$ ):  $\delta$  -144.1 (s, 3F).  $^{31}\text{P}$  NMR (200 MHz,  $\text{CDCl}_3$ ):  $\delta$  44.5 (s).

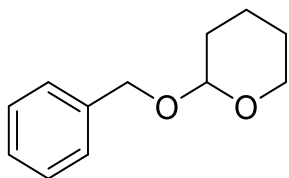**3a**

Colorless liquid. 93% Isolated yield.  $^1\text{H}$  NMR (500 MHz,  $\text{CDCl}_3$ ):  $\delta$  7.40-7.26 (m, 5H), 4.81 (d,  $J = 15$  Hz, 1H), 4.73 (t,  $J = 4.4$  Hz, 1H), 4.52 (d,  $J = 15$  Hz, 1H), 3.97-3.91 (m, 1H), 3.59-3.54 (m, 1H), 1.93-1.84 (m, 1H), 1.79-1.52 (m, 5H).  $^{13}\text{C}$  NMR (125 MHz,  $\text{CDCl}_3$ ):  $\delta$  138.4, 128.5, 127.9, 127.6, 97.8, 68.9, 62.2, 30.7, 25.6, 19.5. QEFMS calcd for  $[\text{C}_{12}\text{H}_{16}\text{O}_2\text{Na}]^+$ : 215.10425, found: 215.10390.

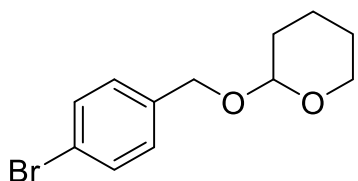**3b**

Colorless liquid. 99% Isolated yield.  $^1\text{H}$  NMR (500 MHz,  $\text{CDCl}_3$ ):  $\delta$  7.46 (d,  $J = 8.6$  Hz, 2H), 7.24 (d,  $J = 8.4$  Hz, 2H), 4.73 (d,  $J = 12.3$  Hz, 1H), 4.69 (t,  $J = 3.5$  Hz, 1H), 4.45 (d,  $J = 12.3$  Hz, 1H), 3.91-3.87 (m, 1H), 3.56-3.52 (m, 1H), 1.89-1.50 (m, 6H).  $^{13}\text{C}$  NMR (125 MHz,  $\text{CDCl}_3$ ):  $\delta$  137.4, 131.1, 129.5, 121.4, 97.9, 68.1, 62.2, 30.6, 25.5, 19.4. QEFMS calcd for  $[\text{C}_{12}\text{H}_{15}\text{BrO}_2\text{Na}]^+$ : 293.01476, found: 293.01405.

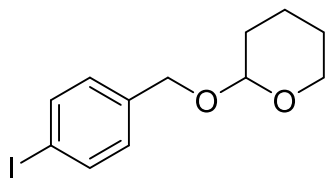**3c**

Colorless liquid. 91% Isolated yield.  $^1\text{H}$  NMR (500 MHz,  $\text{CDCl}_3$ ):  $\delta$  7.68-7.65 (m, 2H), 7.11-7.09 (m, 2H), 4.71 (d,  $J = 12.3$  Hz, 1H), 4.68 (t,  $J = 3.6$  Hz, 1H), 4.45 (d,  $J = 12.4$  Hz, 1H), 3.90-3.86 (m, 1H), 3.56-3.52 (m, 1H), 1.87-1.51 (m, 6H).  $^{13}\text{C}$  NMR (125 MHz,  $\text{CDCl}_3$ ):  $\delta$  138.1, 137.5, 129.7, 128.7, 97.9, 68.2, 62.3, 30.6, 25.5, 19.4. QEFMS calcd for  $[\text{C}_{12}\text{H}_{15}\text{IO}_2\text{Na}]^+$ : 341.00089, found: 341.00039.

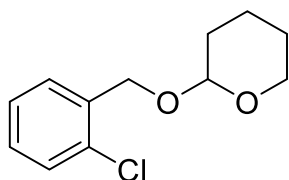

### 3d

Colorless liquid. 99% Isolated yield.  $^1\text{H}$  NMR (500 MHz,  $\text{CDCl}_3$ ):  $\delta$  7.52 (d,  $J = 7.5$  Hz, 1H), 7.34 (d,  $J = 7.8$  Hz, 1H), 7.24 (dt,  $J = 25.7$  Hz, 7.8 Hz, 2H), 4.86 (d,  $J = 13.2$  Hz, 1H), 4.77 (s, 1H), 4.60 (d,  $J = 13.2$  Hz, 1H), 3.92 (t,  $J = 10.6$  Hz, 1H), 3.57-3.55 (m, 1H), 1.90-1.55 (m, 6H).  $^{13}\text{C}$  NMR (125 MHz,  $\text{CDCl}_3$ ):  $\delta$  136.3, 133.0, 129.3, 129.0, 128.6, 126.8, 98.4, 66.4, 62.2, 30.6, 25.5, 19.4. QEFMS calcd for  $[\text{C}_{12}\text{H}_{15}\text{ClO}_2\text{Na}]^+$ : 249.06528, found: 249.06500.

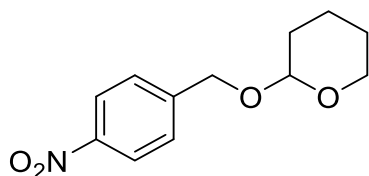

### 3e

Colorless liquid. 88% Isolated yield.  $^1\text{H}$  NMR (500 MHz,  $\text{CDCl}_3$ ):  $\delta$  8.19 (d,  $J = 8.8$  Hz, 2H), 7.52 (d,  $J = 8.8$  Hz, 2H), 4.87 (d,  $J = 13.5$  Hz, 1H), 4.72 (t,  $J = 3.5$  Hz, 1H), 4.59 (d,  $J = 13.5$  Hz, 1H), 3.89-3.85 (m, 1H), 3.57-3.53 (m, 1H), 1.89-1.53 (m, 6H).  $^{13}\text{C}$  NMR (125 MHz,  $\text{CDCl}_3$ ):  $\delta$  146.2, 127.9, 127.1, 123.7, 98.4, 67.7, 62.4, 30.5, 25.4, 19.4. QEFMS calcd for  $[\text{C}_{12}\text{H}_{15}\text{NO}_4\text{Na}]^+$ : 260.08933, found: 260.08915.

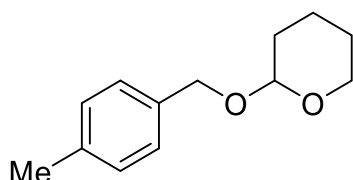

### 3f

Colorless liquid. 93% Isolated yield.  $^1\text{H}$  NMR (500 MHz,  $\text{CDCl}_3$ ):  $\delta$  7.27(d,  $J = 8$  Hz, 2H), 7.17 (d,  $J = 7.8$  Hz, 2H), 4.76 (d,  $J = 11.8$  Hz, 1H), 4.71 (t,  $J = 3.6$  Hz, 1H), 4.48 (d,  $J = 11.8$  Hz, 1H), 3.96-3.92 (m, 1H), 3.58-3.54 (m, 1H), 2.36 (s, 3H) 1.92-1.50 (m, 6H).  $^{13}\text{C}$  NMR (125 MHz,  $\text{CDCl}_3$ ):  $\delta$  137.3, 135.3, 129.1, 128.1, 97.6, 68.8, 62.2, 30.7, 25.6, 21.3, 19.5. QEFMS calcd for  $[\text{C}_{13}\text{H}_{18}\text{O}_2\text{Na}]^+$ : 229.11990, found: 229.11954

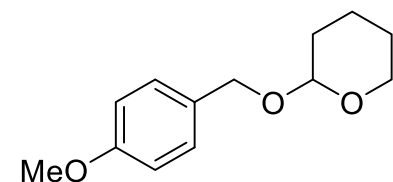

### 3g

Colorless liquid. 92% Isolated yield.  $^1\text{H}$  NMR (500 MHz,  $\text{CDCl}_3$ ):  $\delta$  7.30 (d,  $J = 8.7$  Hz, 2H), 6.88 (d,  $J = 8.7$  Hz, 2H), 4.72 (d,  $J = 11.6$  Hz, 1H), 4.69 (t,  $J = 3.6$  Hz, 1H), 4.44 (d,  $J = 11.6$  Hz, 1H), 3.95-3.90 (m, 1H), 3.8 (s, 3H), 3.55 (m, 1H), 1.88-1.50 (m, 6H).  $^{13}\text{C}$  NMR (125 MHz,  $\text{CDCl}_3$ ):  $\delta$  159.2, 130.4, 129.6, 113.9, 97.6, 68.6, 62.3, 55.4, 30.7, 25.6, 19.5. QEFMS calcd for  $[\text{C}_{13}\text{H}_{18}\text{O}_3\text{Na}]^+$ : 245.11482, found: 229.11456.

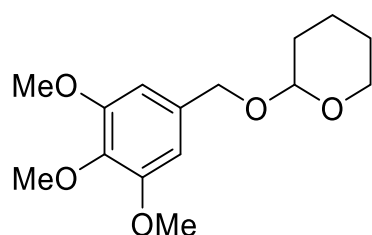

### 3h

Colorless liquid. 93% Isolated yield.  $^1\text{H}$  NMR (500 MHz,  $\text{CDCl}_3$ ):  $\delta$  6.60 (d,  $J = 3.7$  Hz, 2H), 4.72 (d,  $J = 11.9$  Hz, 1H), 4.70 (t,  $J = 3.7$  Hz, 1H), 4.43 (d,  $J = 10.7$  Hz, 1H), 3.96-3.91 (m, 1H), 3.86 (s, 6H), 3.83 (s, 3H), 3.58-3.54 (m, 1H), 1.90-1.52 (m, 6H).  $^{13}\text{C}$  NMR (125 MHz,  $\text{CDCl}_3$ ):  $\delta$  153.4, 137.4, 134.0, 105.0, 97.9, 69.2, 62.5, 61.0, 56.2, 30.8, 25.6, 19.7. QEFMS calcd for  $[\text{C}_{15}\text{H}_{22}\text{O}_5\text{Na}]^+$ : 305.13594, found: 305.13538.

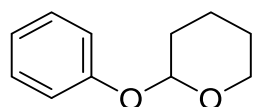

### 3i

Colorless liquid. 98% Isolated yield.  $^1\text{H}$  NMR (500 MHz,  $\text{CDCl}_3$ ):  $\delta$  7.29 (t,  $J = 7.3$  Hz, 2H), 7.07 (d,  $J = 7.9$  Hz, 2H), 7.00 (t,  $J = 7.3$  Hz, 1H), 5.43 (s, 1H), 3.93 (t,  $J = 11.3$  Hz, 1H), 3.63-3.60 (m, 1H), 2.06-1.56 (m, 6H).  $^{13}\text{C}$  NMR (125 MHz,  $\text{CDCl}_3$ ):  $\delta$  157.2, 129.5, 121.7, 116.6, 96.4, 62.1, 30.5, 25.3, 18.9. QEFMS calcd for  $[\text{C}_{11}\text{H}_{14}\text{O}_2\text{Na}]^+$ : 201.08819, found: 201.08858.



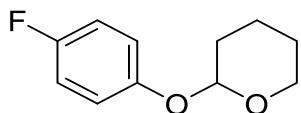

### 3j

Colorless liquid. 95% Isolated yield.  $^1\text{H}$  NMR (500 MHz,  $\text{CDCl}_3$ ):  $\delta$  7.01-6.94 (m, 4H), 5.32 (t,  $J=3.29$  1H), 3.93-3.88 (m, 1H), 3.62-3.58 (m, 1H), 2.07-1.93 (m, 1H), 1.89-1.80 (m, 2H), 1.72-1.58 (m, 3H).  $^{13}\text{C}$  NMR (125 MHz,  $\text{CDCl}_3$ ):  $\delta$  157.9 (d,  $J_{\text{CF}} = 237.5$  Hz), 153.3 (d,  $J_{\text{CF}} = 3.75$  Hz), 117.9 (d,  $J_{\text{CF}} = 7.5$  Hz), 115.9 (d,  $J_{\text{CF}} = 22.5$  Hz), 97.2, 62.2, 30.5, 25.3, 18.9.  $^{19}\text{F}$  NMR (470 MHz,  $\text{CDCl}_3$ ):  $\delta$  -122.9 (sept,  $J_{\text{CF}} = 4.7$  Hz). QEFMS calcd for  $[\text{C}_{11}\text{H}_{13}\text{FO}_2\text{Na}]^+$ : 219.07918, found: 219.07886.

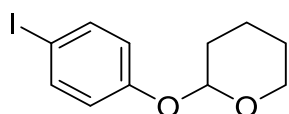

### 3k

Colorless liquid. 95% Isolated yield.  $^1\text{H}$  NMR (500 MHz,  $\text{CDCl}_3$ ):  $\delta$  7.55 (d,  $J = 7.8$  Hz, 2H), 6.83 (d,  $J = 7.8$  Hz, 2H), 5.38 (s, 1H), 3.86 (t,  $J = 11.2$  Hz, 1H), 3.60-3.58 (m, 1H), 2.00-1.58 (m, 6H).  $^{13}\text{C}$  NMR (125 MHz,  $\text{CDCl}_3$ ):  $\delta$  157.0, 138.4, 118.9, 96.4, 84.0, 62.1, 30.3, 25.2, 18.7. QEFMS calcd for  $[\text{C}_{11}\text{H}_{13}\text{IO}_2\text{Na}]^+$ : 326.98524, found: 326.98498.

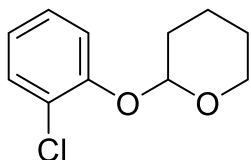

### 3l

Colorless liquid. 83% Isolated yield.  $^1\text{H}$  NMR (400 MHz,  $\text{CDCl}_3$ ):  $\delta$  7.37-7.35 (m, 1H), 7.19-7.18 (m, 2H), 6.95-6.89 (m, 1H), 5.50 (t,  $J = 2.9$  Hz, 1H), 3.96-3.90 (m, 1H), 3.64-3.59 (m, 1H), 2.15-2.04 (m, 1H), 2.00-1.95 (m, 1H), 1.92-1.84 (m, 1H), 1.77-1.61 (m, 3H).  $^{13}\text{C}$  NMR (100 MHz,  $\text{CDCl}_3$ ):  $\delta$  152.7, 130.3, 127.7, 124.0, 122.5, 117.1, 96.9, 62.0, 30.3, 25.3, 18.9. QEFMS calcd for  $[\text{C}_{11}\text{H}_{13}\text{ClO}_2\text{Na}]^+$ : 235.04963, found: 235.04948.

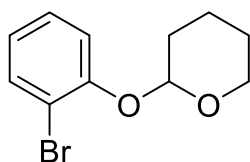

### 3m

Colorless liquid. 74% Isolated yield.  $^1\text{H}$  NMR (500 MHz,  $\text{CDCl}_3$ ):  $\delta$  7.24 (d,  $J = 12.4$  Hz, 1H), 7.13-7.12 (m, 2H), 6.98 (d,  $J = 7.6$  Hz, 1H), 5.40 (t,  $J = 2.8$  Hz, 1H), 3.87 (td,  $J = 10.6$  Hz, 2.8 Hz, 1H), 3.63-3.59 (m, 1H), 1.99-1.57 (m, 6H).  $^{13}\text{C}$  NMR (125 MHz,  $\text{CDCl}_3$ ):  $\delta$  158.0, 130.6, 124.8, 122.7, 120.0, 115.3, 96.9, 62.1, 30.3, 25.2, 18.7. QEFMS calcd for  $[\text{C}_{11}\text{H}_{13}\text{BrO}_2\text{Na}]^+$ : 278.99911, found: 278.99906.

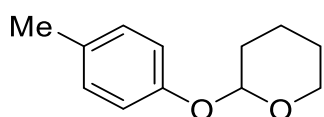

### 3n

Colorless liquid. 82% Isolated yield.  $^1\text{H}$  NMR (500 MHz,  $\text{CDCl}_3$ ):  $\delta$  7.08 (d,  $J = 8.3$  Hz, 2H), 6.95 (d,  $J = 8.6$  Hz, 2H), 5.37 (t,  $J = 3.3$  Hz, 1H), 3.94-3.89 (m, 1H), 3.61-3.57 (m, 1H), 2.28 (s, 3H), 2.05-1.96 (m, 1H), 1.87-1.83 (m, 2H), 1.71-1.57 (m, 3H).  $^{13}\text{C}$  NMR (125 MHz,  $\text{CDCl}_3$ ):  $\delta$  155.0, 131.0, 130.0, 116.5, 96.7, 62.2, 30.6, 25.4, 20.7, 19.0. QEFMS calcd for  $[\text{C}_{12}\text{H}_{16}\text{O}_2\text{Na}]^+$ : 215.10425, found: 215.10387.

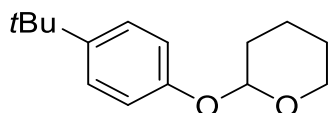

### 3o

Colorless liquid. 89% Isolated yield.  $^1\text{H}$  NMR (500 MHz,  $\text{CDCl}_3$ ):  $\delta$  7.31 (d,  $J = 8.7$  Hz, 2H), 7.0 (d,  $J = 8.7$  Hz, 2H), 5.41 (s, 1H), 3.95 (t,  $J = 9.9$  Hz, 1H), 3.62-3.60 (m, 1H), 2.03-1.60 (m, 6H), 1.31 (s, 9H).  $^{13}\text{C}$  NMR (125 MHz,  $\text{CDCl}_3$ ):  $\delta$  154.9, 144.3, 126.3, 116.0, 96.5, 62.1, 34.2, 31.6, 30.6, 25.3, 19.0. QEFMS calcd for  $[\text{C}_{15}\text{H}_{22}\text{O}_2\text{Na}]^+$ : 257.15120, found: 257.15080.

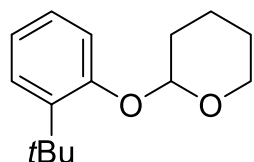

### 3p

Colorless liquid. 92% Isolated yield.  $^1\text{H}$  NMR (400 MHz,  $\text{CDCl}_3$ ):  $\delta$  7.31-7.29 (m, 1H), 7.21-7.14 (m, 2H), 6.94-6.90 (m, 1H), 5.49 (t,  $J = 2.9$  Hz, 1H), 3.95-3.89 (m, 1H), 3.69-3.64 (m, 1H), 2.10-2.01 (m, 1H), 1.95-1.90 (m, 2H), 1.89-1.69 (m, 2H), 1.67-1.61 (m, 1H), 1.43 (s, 9H).  $^{13}\text{C}$  NMR (100 MHz,  $\text{CDCl}_3$ ):  $\delta$  156.2, 138.0, 127.3, 126.7, 121.0, 114.4, 96.2, 61.9, 35.0, 30.7, 30.1, 25.5, 19.1. QEFMS calcd for  $[\text{C}_{15}\text{H}_{22}\text{O}_2\text{Na}]^+$ : 257.15120, found: 257.15090.

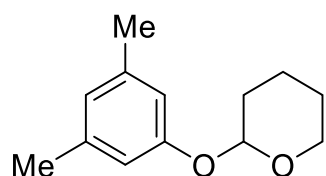

### 3q

Colorless liquid. 93% Isolated yield.  $^1\text{H}$  NMR (500 MHz,  $\text{CDCl}_3$ ):  $\delta$  6.70 (s, 2H), 6.65 (s, 1H), 5.42 (t,  $J = 3.2$  Hz, 1H), 3.94 (td,  $J = 9.8$  Hz, 3.1 Hz, 1H), 3.63-3.60 (m, 1H), 2.30 (s, 6H) 2.04-1.56 (m, 6H).  $^{13}\text{C}$  NMR (125 MHz,  $\text{CDCl}_3$ ):  $\delta$  157.2, 139.2, 123.5, 114.3, 96.3, 62.1, 30.6, 25.4, 21.5, 18.9. QEFMS calcd for  $[\text{C}_{13}\text{H}_{18}\text{O}_2\text{Na}]^+$ : 229.11990, found: 229.11988.

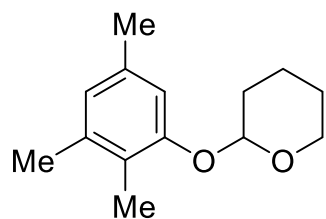

### 3r

Colorless liquid. 71% Isolated yield.  $^1\text{H}$  NMR (500 MHz,  $\text{CDCl}_3$ ):  $\delta$  6.80 (s, 1H), 6.66 (s, 1H), 5.40 (s, 1H), 3.92 (td,  $J = 9.9$  Hz, 2.6 Hz, 1H), 3.64-3.60 (m, 1H), 2.28 (s, 3H), 2.25 (s, 3H), 2.16 (s, 3H), 2.06-2.01 (m, 1H), 1.90-1.88 (m, 2H), 1.74-1.61 (m, 3H).  $^{13}\text{C}$  NMR (125 MHz,  $\text{CDCl}_3$ ):  $\delta$  154.9, 137.6, 135.6, 124.0, 122.7, 112.9, 96.4, 62.1, 30.8, 25.5, 21.4, 20.2, 19.1, 11.6. QEFMS calcd for  $[\text{C}_{14}\text{H}_{20}\text{O}_2\text{Na}]^+$ : 243.13555, found: 243.13525.

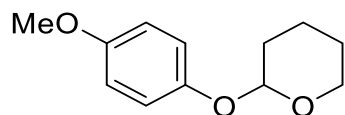

### 3s

Colorless liquid. 99% Isolated yield.  $^1\text{H}$  NMR (500 MHz,  $\text{CDCl}_3$ ):  $\delta$  7.00 (d,  $J = 7.9$  Hz, 2H), 6.82 (d,  $J = 7.9$  Hz, 2H), 5.30 (s, 1H), 3.94 (t,  $J = 11.1$  Hz, 1H), 3.76 (s, 3H), 3.60-3.58 (m, 1H), 2.00-1.55 (m, 6H).  $^{13}\text{C}$  NMR (125 MHz,  $\text{CDCl}_3$ ):  $\delta$  154.6, 151.2, 117.9, 114.6, 97.4, 62.2, 55.7, 30.6, 25.3, 19.0. QEFMS calcd for  $[\text{C}_{12}\text{H}_{16}\text{O}_3\text{Na}]^+$ : 231.09917, found: 231.09923.

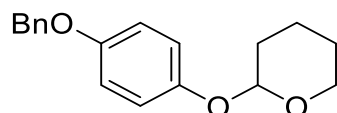

### 3t

Colorless liquid. 86% Isolated yield.  $^1\text{H}$  NMR (500 MHz,  $\text{CDCl}_3$ ):  $\delta$  7.45 (d,  $J = 7.5$  Hz, 2H), 7.40 (t,  $J = 7.3$  Hz, 2H), 7.33 (t,  $J = 7.2$  Hz, 1H), 7.02 (d,  $J = 9.0$  Hz, 2H), 6.92 (d,  $J = 9.0$  Hz, 2H), 5.32 (t,  $J = 3.1$  Hz, 1H), 5.03 (s, 2H), 3.96 (td,  $J = 12.0$  Hz, 2.9 Hz, 1H), 3.63-3.59 (m, 1H), 2.07-1.60 (m, 6H).  $^{13}\text{C}$  NMR (125 MHz,  $\text{CDCl}_3$ ):  $\delta$  153.8, 151.4, 137.4, 128.6, 128.0, 127.6, 117.8, 115.7, 97.4, 70.6, 62.2, 30.6, 25.4, 19.0. QEFMS calcd for  $[\text{C}_{18}\text{H}_{20}\text{O}_3\text{Na}]^+$ : 307.13047, found: 307.13000.

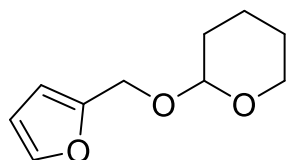

### 3u

Colorless liquid. 70% Isolated yield.  $^1\text{H}$  NMR (500 MHz,  $\text{CDCl}_3$ ):  $\delta$  7.41 (m, 1H), 6.33 (d,  $J = 2.5$  Hz, 2H), 4.71 (m, 1H), 4.67 (d,  $J = 12.8$  Hz, 1H), 4.49 (d,  $J = 12.8$  Hz, 1H), 3.90 (t,  $J = 10.2$  Hz, 1H), 3.55 (m, 1H), 1.87-1.80 (m, 1H), 1.74-1.69 (m, 1H), 1.63-1.59 (m, 2H), 1.54-1.52 (m, 2H).  $^{13}\text{C}$  NMR (125 MHz,  $\text{CDCl}_3$ ):  $\delta$  151.9, 142.9, 110.4, 109.4, 97.4, 62.1, 60.7, 30.5, 25.5, 19.3. QEFMS calcd for  $[\text{C}_{10}\text{H}_{14}\text{O}_3\text{Na}]^+$ : 205.08352, found: 205.08313.

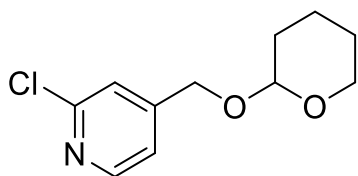

### 3v

Colorless liquid. 65% Isolated yield.  $^1\text{H}$  NMR (400 MHz,  $\text{CDCl}_3$ ):  $\delta$  8.36 (d,  $J = 2.1$  Hz, 1H), 7.66 (dd,  $J = 8.2, 2.4$  Hz, 1H), 7.30 (d,  $J = 8.1$  Hz, 1H), 4.76 (d,  $J = 12.4$  Hz, 1H), 4.67 (t,  $J = 3.4$  Hz, 1H), 4.48 (d,  $J = 12.4$  Hz, 1H), 3.88-3.82 (m, 1H), 3.56-3.51 (m, 1H), 1.87-1.70 (m, 2H), 1.66-1.52 (m, 4H).  $^{13}\text{C}$  NMR (100 MHz,  $\text{CDCl}_3$ ):  $\delta$  150.7, 149.1, 138.5, 132.9, 124.1, 98.3, 65.7, 62.4, 30.5, 25.4, 19.3. QEFMS calcd for  $[\text{C}_{11}\text{H}_{14}\text{NO}_2\text{Cl}+\text{H}]^+$ : 228.07858, found: 228.07822.

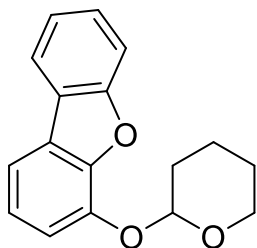

### 3w

Colorless liquid. 69% Isolated yield.  $^1\text{H}$  NMR (400 MHz,  $\text{CDCl}_3$ ):  $\delta$  7.92 (dd,  $J = 7.6, 0.5$  Hz, 1H), 7.62 (d,  $J = 8.2$  Hz, 1H), 7.59 (d,  $J = 4.4$  Hz, 1H), 7.45 (td,  $J = 7.4, 1.3$  Hz, 1H), 7.33 (td,  $J = 7.7, 0.8$  Hz, 1H), 7.25 (d,  $J = 4.1$  Hz, 2H), 5.74 (t,  $J = 3.1$  Hz, 1H), 4.03 (td,  $J = 11.4, 3.0$  Hz, 1H), 3.64 (dtd,  $J = 11.2, 3.8, 1.1$  Hz, 1H), 2.22-2.05 (m, 2H), 2.01-1.93 (m, 1H), 1.79-1.63 (m, 3H).  $^{13}\text{C}$  NMR (100 MHz,  $\text{CDCl}_3$ ):  $\delta$  156.3, 146.2, 142.7, 127.2, 126.2, 124.6, 123.5, 122.8, 120.8, 114.7, 114.0, 112.1, 97.5, 62.2, 30.4, 25.3, 18.7. QEFMS calcd for  $[\text{C}_{17}\text{H}_{16}\text{O}_3\text{Na}]^+$ : 291.09917, found: 291.09847.

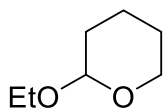

### 3x

Colorless liquid. 99% Isolated yield.  $^1\text{H}$  NMR (400 MHz,  $\text{CDCl}_3$ ):  $\delta$  4.57 (dd,  $J = 2.7, 4.5$  Hz, 1H), 3.89-3.83 (m, 1H), 3.81-3.77 (m, 1H), 3.51-3.40 (m, 2H), 1.88-1.76 (m, 1H), 1.74-1.66 (m, 1H), 1.60-1.48 (m, 4H), 1.21 (t,  $J = 7.0$  Hz, 3H).  $^{13}\text{C}$  NMR (100 MHz,  $\text{CDCl}_3$ ):  $\delta$  98.8, 63.0, 62.6, 30.9, 25.6, 19.9, 15.3. QEFMS calcd for  $[\text{C}_7\text{H}_{14}\text{O}_2\text{Na}]^+$ : 153.08860, found: 153.08840.

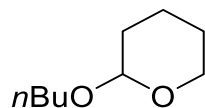

### 3y

Colorless liquid. 99% Isolated yield. <sup>1</sup>H NMR (400 MHz, CDCl<sub>3</sub>): δ 4.56 (t, *J* = 2.6 Hz, 1H), 3.88-3.83 (m, 1H), 3.72 (dt, *J* = 9.6 Hz, 6.8 Hz, 1H), 3.51-3.46 (m, 1H), 3.37 (dt, *J* = 9.6 Hz, 6.8 Hz, 1H), 1.85-1.77 (m, 1H), 1.73-1.67 (m, 1H), 1.60-1.47 (m, 6H), 1.42-1.33 (m, 2H), 0.91 (t, *J* = 7.4 Hz, 3H). <sup>13</sup>C NMR (100 MHz, CDCl<sub>3</sub>): δ 98.9, 67.5, 62.4, 32.0, 30.9, 25.6, 19.8, 19.6, 14.0. QEFMS calcd for [C<sub>9</sub>H<sub>18</sub>O<sub>2</sub>Na]<sup>+</sup>: 181.1199, found: 181.1197.

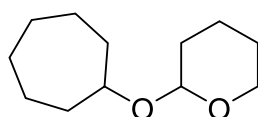

### 3z

Colorless liquid. 90% Isolated yield. <sup>1</sup>H NMR (500 MHz, CDCl<sub>3</sub>): δ 4.64 (t, *J* = 3.7 Hz, 1H), 3.90 (sept, *J* = 3.6 Hz, 1H), 3.78 (sept, *J* = 4.2 Hz, 1H), 1.98-1.93 (m, 1H), 1.86-1.81 (m, 2H), 1.72-1.61 (m, 5H), 1.59-1.49 (m, 9H), 1.42-1.34 (m, 2H). <sup>13</sup>C NMR (125 MHz, CDCl<sub>3</sub>): δ 96.9, 76.8, 62.9, 35.8, 33.4, 31.5, 28.4, 28.2, 25.7, 23.3, 23.0, 20.2. QEFMS calcd for [C<sub>12</sub>H<sub>22</sub>O<sub>2</sub>Na]<sup>+</sup>: 221.15120, found: 221.15098.

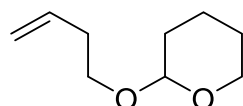

### 3aa

Colorless liquid. 70% Isolated yield. <sup>1</sup>H NMR (500 MHz, CDCl<sub>3</sub>): δ 5.88-5.80 (m, 1H), 5.10 (d, *J* = 17.2 Hz, 1H), 5.03 (d, *J* = 10.3 Hz, 1H), 4.59 (t, *J* = 3.5 Hz, 1H), 3.86 (t, *J* = 9.3 Hz, 1H), 3.78 (q, *J* = 7.1 Hz, 1H), 3.52-3.43 (m, 2H), 5.10 (q, *J* = 17 Hz, 2H), 1.85-1.79 (m, 1H), 1.74-1.68 (m, 1H), 1.61-1.50 (m, 4H). <sup>13</sup>C NMR (125 MHz, CDCl<sub>3</sub>): δ 135.4, 116.4, 98.9, 66.9, 62.4, 34.3, 30.8, 25.6, 19.7. QEFMS calcd for [C<sub>9</sub>H<sub>16</sub>O<sub>2</sub>Na]<sup>+</sup>: 179.10425, found: 179.10409.

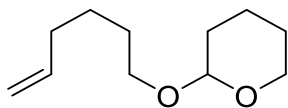

### 3ab

Colorless liquid. 92% Isolated yield.  $^1\text{H NMR}$  (500 MHz,  $\text{CDCl}_3$ ):  $\delta$  5.80 (sext,  $J = 8.1$  Hz, 1H), 4.99 (d,  $J = 17.2$  Hz, 1H), 4.93 (d,  $J = 10.2$  Hz, 1H), 4.56 (s, 1H), 3.85 (t,  $J = 9.5$  Hz, 1H), 3.73 (q,  $J = 7.7$  Hz, 1H), 3.48 (t,  $J = 5.5$  Hz, 1H), 3.37 (q,  $J = 7.5$  Hz, 1H), 2.07 (q,  $J = 7.1$  Hz, 2H), 1.81 (q,  $J = 8.8$  Hz, 1H), 1.69 (t,  $J = 11.1$  Hz, 1H), 1.63-1.45 (m, 9H).  $^{13}\text{C NMR}$  (125 MHz,  $\text{CDCl}_3$ ):  $\delta$  138.9, 114.6, 98.9, 67.5, 62.4, 33.7, 30.9, 29.3, 25.7, 25.6, 19.8. QEFMS calcd for  $[\text{C}_{11}\text{H}_{20}\text{O}_2\text{Na}]^+$ : 207.13555, found: 207.13535.

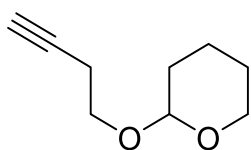

### 3ac

Colorless liquid. 94% Isolated yield.  $^1\text{H NMR}$  (500 MHz,  $\text{CDCl}_3$ ):  $\delta$  4.64 (t,  $J = 3.4$  Hz, 1H), 3.89-3.80 (m, 2H), 3.58-3.48 (m, 2H), 2.48 (td,  $J = 7$  Hz, 2.5 Hz, 2H), 1.97 (t,  $J = 2.4$  Hz, 1H), 1.85-1.50 (m, 6H).  $^{13}\text{C NMR}$  (125 MHz,  $\text{CDCl}_3$ ):  $\delta$  98.9, 81.6, 69.3, 65.6, 62.3, 30.6, 25.5, 20.1, 19.5. QEFMS calcd for  $[\text{C}_9\text{H}_{14}\text{O}_2\text{Na}]^+$ : 177.08860, found: 177.08848.

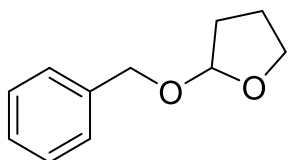

### 5a

Colorless liquid. 99% Isolated yield.  $^1\text{H NMR}$  (500 MHz,  $\text{CDCl}_3$ ):  $\delta$  7.38 (m, 4H), 7.26 (m, 1H), 5.23 (d,  $J = 4.4$  Hz, 1H), 4.73 (d,  $J = 11.9$  Hz, 1H), 4.49 (d,  $J = 11.9$  Hz, 1H), 3.99-3.89 (m, 2H), 2.09-1.82 (m, 4H).  $^{13}\text{C NMR}$  (125 MHz,  $\text{CDCl}_3$ ):  $\delta$  138.4, 128.5, 128.0, 127.6, 103.2, 68.9, 67.1, 32.4, 23.6. QEFMS calcd for  $[\text{C}_{11}\text{H}_{14}\text{O}_2\text{Na}]^+$ : 201.08860, found: 201.08832.

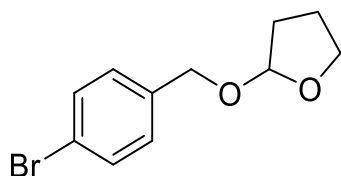**5b**

Colorless liquid. 94% Isolated yield.  $^1\text{H}$  NMR (500 MHz,  $\text{CDCl}_3$ ):  $\delta$  7.45 (d,  $J = 7.6$  Hz, 2H), 7.21 (d,  $J = 7.7$  Hz, 2H), 5.19 (s, 1H), 4.65 (d,  $J = 12.2$  Hz, 1H), 4.45 (d,  $J = 12.1$  Hz, 1H), 3.91 (sext,  $J = 7.2$  Hz, 2H), 2.05-1.81 (m, 4H).  $^{13}\text{C}$  NMR (125 MHz,  $\text{CDCl}_3$ ):  $\delta$  137.5, 131.5, 129.5, 121.4, 103.3, 68.1, 67.2, 32.5, 23.5. QEFMS calcd for  $[\text{C}_{11}\text{H}_{13}\text{BrO}_2\text{Na}]^+$ : 278.99911, found: 278.99890.

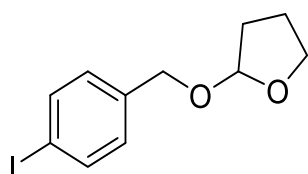**5c**

Colorless liquid. 97% Isolated yield.  $^1\text{H}$  NMR (500 MHz,  $\text{CDCl}_3$ ):  $\delta$  7.66 (d,  $J = 7.5$  Hz, 2H), 7.08 (d,  $J = 7.6$  Hz, 2H), 5.19 (s, 1H), 4.64 (d,  $J = 12.2$  Hz, 1H), 4.41 (d,  $J = 12.2$  Hz, 1H), 3.91 (sext,  $J = 7.3$  Hz, 2H), 2.05-1.80 (m, 4H).  $^{13}\text{C}$  NMR (125 MHz,  $\text{CDCl}_3$ ):  $\delta$  138.2, 137.5, 129.8, 103.3, 93.0, 68.1, 67.2, 32.4, 23.5. QEFMS calcd for  $[\text{C}_{11}\text{H}_{13}\text{IO}_2\text{Na}]^+$ : 326.98524, found: 326.98447.

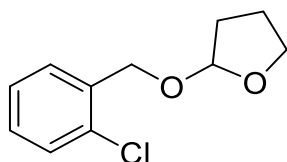**5d**

Colorless liquid. 99% Isolated yield.  $^1\text{H}$  NMR (500 MHz,  $\text{CDCl}_3$ ):  $\delta$  7.46 (d,  $J = 7.4$  Hz, 1H), 7.34 (d,  $J = 7.5$  Hz, 1H), 7.28-7.19 (m, 2H), 5.26 (d,  $J = 4.1$  Hz, 1H), 4.80 (d,  $J = 13.0$  Hz, 1H), 4.57 (d,  $J = 13.0$  Hz, 1H), 3.94 (dq,  $J = 5.1$  Hz, 7 Hz, 2H), 2.08-1.85 (m, 4H).  $^{13}\text{C}$  NMR (125 MHz,  $\text{CDCl}_3$ ):  $\delta$  136.3, 133.2, 129.4, 129.3, 128.7, 126.8, 103.7, 67.3, 66.2, 32.5, 23.5. QEFMS calcd for  $[\text{C}_{11}\text{H}_{13}\text{ClO}_2\text{Na}]^+$ : 235.04963, found: 235.04924.



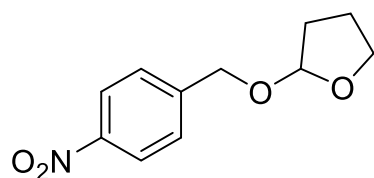

### 5e

Colorless liquid. 92% Isolated yield.  $^1\text{H NMR}$  (500 MHz,  $\text{CDCl}_3$ ):  $\delta$  8.17(d,  $J = 7.9$  Hz, 2H), 7.48 (d,  $J = 7.9$ Hz, 2H), 5.21 (s, 1H), 4.79 (d,  $J = 13.5$  Hz, 1H), 4.56 (d,  $J = 13.4$  Hz, 1H), 3.91 (sext,  $J = 7.5$  Hz, 2H), 2.07-1.87 (m, 4H).  $^{13}\text{C NMR}$  (125 MHz,  $\text{CDCl}_3$ ):  $\delta$  147.3, 146.4, 127.9, 123.6, 103.8, 67.6, 67.4, 32.5, 23.5. QEFMS calcd for  $[\text{C}_{11}\text{H}_{13}\text{NO}_4\text{Na}]^+$ : 246.07368, found: 246.07359.

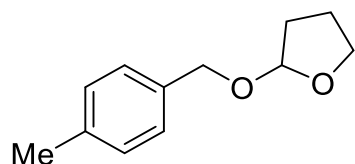

### 5f

Colorless liquid. 87% Isolated yield.  $^1\text{H NMR}$  (500 MHz,  $\text{CDCl}_3$ ):  $\delta$  7.25 (d,  $J = 7.6$  Hz, 2H), 7.16 (d,  $J = 7.7$  Hz, 2H), 5.22 (s, 1H), 4.69 (d,  $J = 11.7$  Hz, 1H), 4.45 (d,  $J = 11.6$  Hz, 1H), 3.91 (dq,  $J = 26.1$  Hz, 7.2 Hz, 2H), 2.35 (s, 3H), 2.08-1.81 (m, 4H).  $^{13}\text{C NMR}$  (125 MHz,  $\text{CDCl}_3$ ):  $\delta$  137.3, 135.3, 129.1, 128.1, 103.0, 68.7, 67.1, 32.4, 23.6, 21.2. QEFMS calcd for  $[\text{C}_{12}\text{H}_{16}\text{O}_2\text{Na}]^+$ : 215.10425, found: 216.10402.

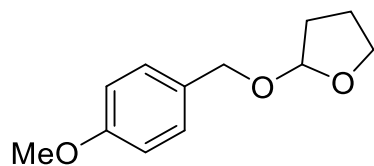

### 5g

Colorless liquid. 98% Isolated yield.  $^1\text{H NMR}$  (500 MHz,  $\text{CDCl}_3$ ):  $\delta$  7.27 (d,  $J = 8.2$  Hz, 2H), 6.88 (d,  $J = 7.6$  Hz, 2H), 5.20 (s, 1H) 4.65 (d,  $J = 11.4$  Hz, 1H), 4.41 (d,  $J = 11.4$  Hz, 1H), 3.92 (sept,  $J = 7.3$  Hz, 2H), 3.8 (s, 3H), 2.07-1.80 (m, 4H).  $^{13}\text{C NMR}$  (125 MHz,  $\text{CDCl}_3$ ):  $\delta$  159.2, 130.5, 129.6, 113.8, 102.9, 68.5, 67.1, 55.4, 32.4, 23.6. QEFMS calcd for  $[\text{C}_{12}\text{H}_{16}\text{O}_3\text{Na}]^+$ : 231.09859, found: 231.09917.

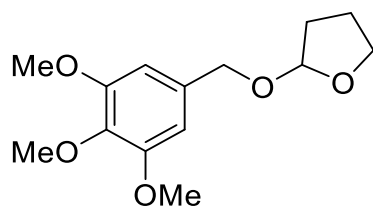

### 5h

Colorless liquid. 99% Isolated yield.  $^1\text{H}$  NMR (500 MHz,  $\text{CDCl}_3$ ):  $\delta$  6.5 (s, 2H), 5.22 (t,  $J = 3.2$  Hz, 1H), 4.63 (d,  $J = 11.7$  Hz, 1H), 4.40 (d,  $J = 11.7$  Hz, 1H), 3.98-3.89 (m, 2H), 3.86 (s, 6H), 3.82 (s, 3H), 2.07-1.82 (m, 4H).  $^{13}\text{C}$  NMR (125 MHz,  $\text{CDCl}_3$ ):  $\delta$  153.4, 137.4, 134.0, 105.0, 103.2, 69.2, 67.2, 60.9, 56.2, 32.5, 23.6. QEFMS calcd for  $[\text{C}_{14}\text{H}_{20}\text{O}_5\text{Na}]^+$ : 291.12029, found: 291.11961.

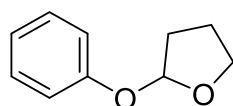

### 5i

Colorless liquid. 96% Isolated yield.  $^1\text{H}$  NMR (500 MHz,  $\text{CDCl}_3$ ):  $\delta$  7.28 (t,  $J = 7.6$  Hz, 2H), 7.03 (d,  $J = 7.9$  Hz, 2H), 6.98 (t,  $J = 7.4$  Hz, 1H), 5.81 (d,  $J = 4.7$  Hz, 1H), 4.07-4.03 (m, 1H), 3.97-3.93 (m, 1H), 2.21-2.10 (m, 3H), 1.99-1.90 (m, 1H).  $^{13}\text{C}$  NMR (125 MHz,  $\text{CDCl}_3$ ):  $\delta$  157.3, 129.5, 121.6, 116.6, 102.4, 68.2, 32.8, 23.6. QEFMS calcd for  $[\text{C}_{10}\text{H}_{12}\text{O}_2\text{Na}]^+$ : 187.07295, found: 187.07261.

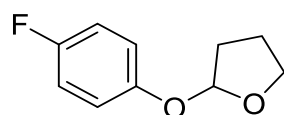

### 5j

Colorless liquid. 71% Isolated yield.  $^1\text{H}$  NMR (500 MHz,  $\text{CDCl}_3$ ):  $\delta$  6.99-6.94 (m, 4H), 4.76 (d,  $J = 4.8$  Hz, 1H), 4.07-4.02 (m, 1H), 3.97-3.92 (m, 1H), 2.21-2.06 (m, 3H), 1.99-1.89 (m, 1H).  $^{13}\text{C}$  NMR (125 MHz,  $\text{CDCl}_3$ ):  $\delta$  158.0 (d,  $J_{\text{CF}} = 237.5$  Hz), 153.4 (d,  $J_{\text{CF}} = 1.25$  Hz), 118.0 (d,  $J_{\text{CF}} = 8.75$  Hz), 115.84 (d,  $J_{\text{CF}} = 22.5$  Hz), 103.1, 68.1, 32.8, 23.5.  $^{19}\text{F}$  NMR (470 MHz,  $\text{CDCl}_3$ ):  $\delta$  -123.0 (sext,  $J_{\text{CF}} = 4.7$  Hz). QEFMS calcd for  $[\text{C}_{10}\text{H}_{11}\text{FO}_2\text{Na}]^+$ : 205.06353, found: 205.06357.

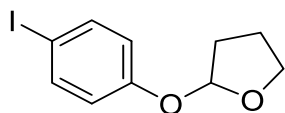**5k**

Colorless liquid. 88% Isolated yield.  $^1\text{H}$  NMR (500 MHz,  $\text{CDCl}_3$ ):  $\delta$  7.54 (d,  $J = 8.8$  Hz, 2H), 6.80 (d,  $J = 8.8$  Hz, 2H), 5.74 (d,  $J = 4.6$  Hz, 1H), 4.02 (q,  $J = 7.6$  Hz, 1H), 3.94 (q,  $J = 7.9$  Hz, 1H), 2.19-1.92 (m, 4H).  $^{13}\text{C}$  NMR (125 MHz,  $\text{CDCl}_3$ ):  $\delta$  157.2, 138.2, 119.0, 102.4, 84.0, 68.3, 32.8, 23.5. QEFMS calcd for  $[\text{C}_{10}\text{H}_{11}\text{IO}_2\text{Na}]^+$ : 312.96959, found: 312.96946.

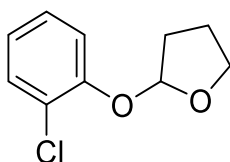**5l**

Colorless liquid. 72% Isolated yield.  $^1\text{H}$  NMR (500 MHz,  $\text{CDCl}_3$ ):  $\delta$  7.52 (dd,  $J = 7.9$  Hz, 1.5 Hz, 1H), 7.23-7.18 (m, 2H), 6.87 (td,  $J = 7.9$  Hz, 1.7 Hz, 1H), 5.82 (d,  $J = 4.5$  Hz, 1H), 4.10 (dt,  $J = 8.1$  Hz, 5.6 Hz, 1H), 3.96 (q,  $J = 6.7$  Hz, 1H), 2.35-1.93 (m, 4H).  $^{13}\text{C}$  NMR (125 MHz,  $\text{CDCl}_3$ ):  $\delta$  153.8, 133.3, 128.5, 123.0, 117.4, 113.7, 103.5, 68.5, 32.9, 23.4. QEFMS calcd for  $[\text{C}_{10}\text{H}_{11}\text{ClO}_2\text{Na}]^+$ : 221.0339, found: 221.0336.

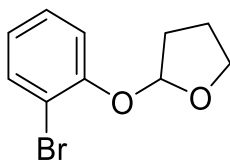**5m**

Colorless liquid. 94% Isolated yield.  $^1\text{H}$  NMR (500 MHz,  $\text{CDCl}_3$ ):  $\delta$  7.35 (dd,  $J = 7.9$  Hz, 6.5 Hz, 1H), 7.23 (m, 2H), 6.95-6.91 (m, 1H), 5.81 (d,  $J = 4.5$  Hz, 1H), 4.10 (dd,  $J = 13.8$  Hz, 5.8 Hz, 1H), 3.97 (dd,  $J = 14.3$  Hz, 7.7 Hz, 1H), 2.34-2.29 (m, 1H), 2.27-2.10 (m, 2H), 2.00-1.93 (m, 1H).  $^{13}\text{C}$  NMR (125 MHz,  $\text{CDCl}_3$ ):  $\delta$  152.9, 130.3, 127.7, 124.2, 122.6, 117.6, 103.5, 68.5, 32.9, 23.4. QEFMS calcd for  $[\text{C}_{10}\text{H}_{11}\text{BrO}_2\text{Na}]^+$ : 264.98346, found: 264.98317.

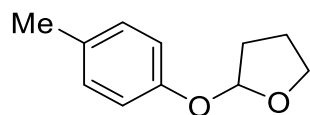

### 5n

Colorless liquid. 85% Isolated yield.  $^1\text{H}$  NMR (500 MHz,  $\text{CDCl}_3$ ):  $\delta$  7.22 (d,  $J = 9.0$  Hz, 2H), 6.98 (d,  $J = 9.0$  Hz, 2H), 5.37 (t,  $J = 3.2$  Hz, 1H), 3.90-3.85 (m, 1H), 3.62-3.57 (m, 1H), 2.03-1.95 (m, 1H), 1.87-1.84 (m, 2H), 1.73-1.56 (m, 4H).  $^{13}\text{C}$  NMR (125 MHz,  $\text{CDCl}_3$ ):  $\delta$  155.8, 129.4, 126.6, 117.9, 96.7, 62.1, 30.4, 25.3, 18.8. QEFMS calcd for  $[\text{C}_{11}\text{H}_{14}\text{O}_2\text{Na}]^+$ : 201.08860, found: 201.08839.

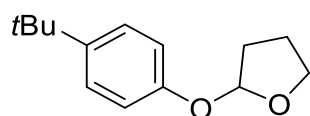

### 5o

Colorless liquid. 99% Isolated yield, 33% Isolated yield.  $^1\text{H}$  NMR (500 MHz,  $\text{CDCl}_3$ ):  $\delta$  7.29 (dt,  $J = 8.8$  Hz, 2.1 Hz, 2H), 6.96 (dt,  $J = 8.8$  Hz, 2.2 Hz, 2H), 5.80 (d,  $J = 4.8$  Hz, 1H), 4.06-4.02 (m, 1H), 3.96-3.92 (m, 1H), 2.20-1.89 (m, 4H), 1.29 (s, 9H).  $^{13}\text{C}$  NMR (125 MHz,  $\text{CDCl}_3$ ):  $\delta$  154.9, 144.3, 126.3, 116.0, 102.4, 68.1, 34.2, 32.8, 31.6, 23.6. QEFMS calcd for  $[\text{C}_{14}\text{H}_{20}\text{O}_2\text{Na}]^+$ : 243.13555, found: 243.13538.

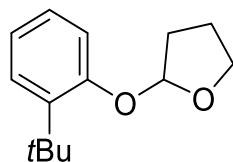

### 5p

Colorless liquid. 75% Isolated yield.  $^1\text{H}$  NMR (400 MHz,  $\text{CDCl}_3$ ):  $\delta$  7.30-7.26 (m, 1H), 7.23-7.15 (m, 2H), 6.94-6.90 (m, 1H), 5.87 (d,  $J = 4.6$  Hz, 1H), 4.09-4.04 (m, 1H), 4.01-3.96 (m, 1H), 2.30 (m, 3H), 2.05-1.97 (m, 1H), 1.38 (s, 9H).  $^{13}\text{C}$  NMR (100 MHz,  $\text{CDCl}_3$ ):  $\delta$  156.0, 138.2, 127.1, 126.7, 121.0, 114.6, 101.8, 68.0, 34.9, 32.9, 30.0, 23.7. QEFMS calcd for  $[\text{C}_{14}\text{H}_{20}\text{O}_2\text{Na}]^+$ : 243.13555, found: 243.13533.

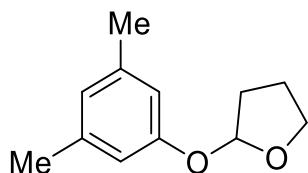

### 5q

Colorless liquid. 81% Isolated yield.  $^1\text{H}$  NMR (500 MHz,  $\text{CDCl}_3$ ):  $\delta$  6.69 (s, 2H), 6.65 (s, 1H), 5.81 (d,  $J = 4.8$  Hz, 1H), 4.09-4.04 (m, 1H), 3.98-3.93 (m, 1H), 2.30 (s, 6H), 2.20-1.92 (m, 4H).  $^{13}\text{C}$  NMR (125 MHz,  $\text{CDCl}_3$ ):  $\delta$  157.2, 139.2, 123.4, 114.3, 102.2, 68.1, 32.8, 23.6, 21.5. QEFMS calcd for  $[\text{C}_{12}\text{H}_{16}\text{O}_2\text{Na}]^+$ : 215.10425, found: 215.10431.

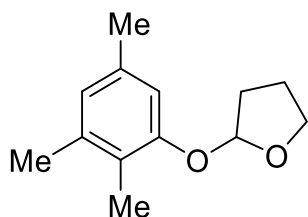

### 5r

Colorless liquid. 97% Isolated yield, 31% Isolated yield.  $^1\text{H}$  NMR (500 MHz,  $\text{CDCl}_3$ ):  $\delta$  6.85 (s, 1H), 6.67 (s, 1H), 5.79 (d,  $J = 4.7$  Hz, 1H), 4.09 (q,  $J = 6.0$  Hz, 1H), 3.97 (q,  $J = 6.2$  Hz, 1H), 2.30 (s, 3H), 2.25-2.11 (m, 9H), 1.99-1.96 (m, 1H).  $^{13}\text{C}$  NMR (125 MHz,  $\text{CDCl}_3$ ):  $\delta$  155.1, 137.7, 135.6, 124.1, 123.0, 113.5, 102.8, 68.0, 32.9, 23.7, 21.4, 20.2, 11.7. QEFMS calcd for  $[\text{C}_{13}\text{H}_{18}\text{O}_2\text{Na}]^+$ : 229.11990, found: 229.11983.

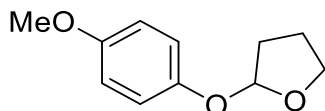

### 5s

Colorless liquid. 99% Isolated yield.  $^1\text{H}$  NMR (500 MHz,  $\text{CDCl}_3$ ):  $\delta$  6.97 (dd,  $J = 6.7$  Hz, 2.3 Hz, 2H), 6.82 (dd,  $J = 6.7$  Hz, 2.3 Hz, 2H), 5.70 (t,  $J = 4.8$  Hz, 1H), 4.07-4.03 (m, 1H), 3.96-3.90 (m, 1H), 3.76 (s, 3H), 2.18-1.90 (m, 4H).  $^{13}\text{C}$  NMR (125 MHz,  $\text{CDCl}_3$ ):  $\delta$  154.7, 151.2, 118.0, 114.7, 103.3, 68.0, 55.8, 32.8, 23.6. QEFMS calcd for  $[\text{C}_{11}\text{H}_{14}\text{O}_3\text{Na}]^+$ : 217.08352, found: 217.08356.

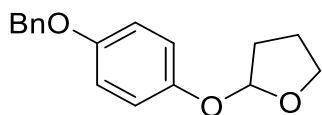

### 5t

Colorless liquid. 89% Isolated yield.  $^1\text{H}$  NMR (500 MHz,  $\text{CDCl}_3$ ):  $\delta$  7.45 (d,  $J = 7.1$  Hz, 2H), 7.40 (t,  $J = 7.2$  Hz, 2H), 7.34 (t,  $J = 7.2$  Hz, 1H), 7.00 (dd,  $J = 6.7$  Hz, 2.35 Hz, 2H), 6.92 (dd,  $J = 6.7$  Hz, 2.35 Hz, 2H), 5.73 (d,  $J = 4.8$  Hz, 1H), 5.03 (s, 2H), 4.10-4.05 (m, 1H), 3.98-3.94 (m, 1H), 2.20-1.91 (m, 4H).  $^{13}\text{C}$  NMR (125 MHz,  $\text{CDCl}_3$ ):  $\delta$  153.8, 151.5, 137.4, 128.6, 128.6, 127.9, 127.6, 118.0, 115.8, 70.6, 67.9, 32.7, 23.5. QEFMS calcd for  $[\text{C}_{17}\text{H}_{18}\text{O}_3\text{Na}]^+$ : 293.11482, found: 293.11440.

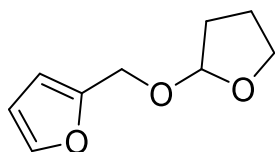

### 5u

Colorless liquid. 70% Isolated yield.  $^1\text{H}$  NMR (500 MHz,  $\text{CDCl}_3$ ):  $\delta$  7.40 (s, 1H), 6.32 (m, 2H), 5.21 (t,  $J = 3.0$  Hz, 1H), 4.60 (d,  $J = 12.8$  Hz, 1H), 4.46 (d,  $J = 12.8$  Hz, 1H), 3.92 (m, 2H), 2.05-1.97 (m, 1H), 1.95-1.91 (m, 2H), 1.87-1.79 (m, 1H).  $^{13}\text{C}$  NMR (125 MHz,  $\text{CDCl}_3$ ):  $\delta$  151.9, 142.9, 110.4, 109.3, 102.8, 67.2, 60.7, 32.4, 25.5. QEFMS calcd for  $[\text{C}_9\text{H}_{12}\text{O}_3\text{Na}]^+$ : 191.06787, found: 191.06778.

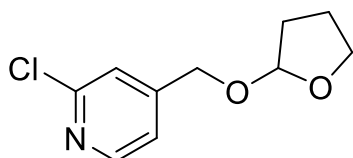

### 5v

Colorless liquid. 65% Isolated yield.  $^1\text{H}$  NMR (400 MHz,  $\text{CDCl}_3$ ):  $\delta$  8.33 (d,  $J = 1.9$  Hz, 1H), 7.61 (dd,  $J = 8.2, 2.2$  Hz, 1H), 7.28 (d,  $J = 8.1$  Hz, 1H), 5.18 (t,  $J = 2.8$  Hz, 1H), 4.67 (d,  $J = 12.2$  Hz, 1H), 4.45 (d,  $J = 12.2$  Hz, 1H), 3.89 (t,  $J = 6.3$  Hz, 2H), 2.05-1.80 (m, 4H).  $^{13}\text{C}$  NMR (100 MHz,  $\text{CDCl}_3$ ):  $\delta$  150.6, 149.1, 138.4, 133.1, 124.1, 103.6, 67.4, 65.5, 32.5, 23.5. QEFMS calcd for  $[\text{C}_{10}\text{H}_{12}\text{NO}_2\text{Cl}+\text{H}]^+$ : 214.06293, found: 214.06257.

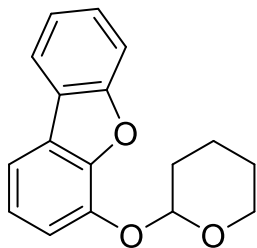

### 5w

Colorless liquid. 69% Isolated yield.  $^1\text{H}$  NMR (500 MHz,  $\text{CDCl}_3$ ):  $\delta$  7.93 (d,  $J = 7.7$  Hz, 1H), 7.63-7.59 (m, 2H), 7.45 (t,  $J = 8.2$  Hz, 1H), 7.34 (t,  $J = 7.2$  Hz, 1H), 7.28-7.26 (m, 2H), 6.10 (d,  $J = 4.8$  Hz, 1H), 4.17 (q,  $J = 8.0$  Hz, 1H), 4.03 (q,  $J = 7.7$  Hz, 1H), 2.49-2.40 (m, 1H), 2.35-2.10 (m, 2H), 2.08-1.96 (m, 1H).  $^{13}\text{C}$  NMR (125 MHz,  $\text{CDCl}_3$ ):  $\delta$  156.2, 146.2, 142.8, 127.2, 126.1, 124.6, 123.5, 122.8, 120.8, 114.6, 114.0, 112.0, 103.6, 68.5, 32.9, 23.5. QEFMS calcd for  $[\text{C}_{16}\text{H}_{14}\text{O}_3\text{Na}]^+$ : 277.08352, found: 277.08289.

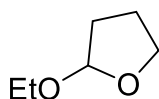

### 5x

Colorless liquid. 95% Isolated yield.  $^1\text{H}$  NMR (500 MHz,  $\text{CDCl}_3$ ):  $\delta$  5.07 (q,  $J = 3.3$  Hz, 1H), 3.87-3.78 (m, 2H), 3.69-3.62 (m, 1H), 3.41-3.35 (m, 1H), 1.99-1.73 (m, 4H), 1.14 (t,  $J = 7.0$  Hz, 3H).  $^{13}\text{C}$  NMR (125 MHz,  $\text{CDCl}_3$ ):  $\delta$  103.8, 67.0, 62.8, 32.5, 23.7, 15.4. QEFMS calcd for  $[\text{C}_6\text{H}_{12}\text{O}_2\text{Na}]^+$ : 139.07295, found: 139.07284.

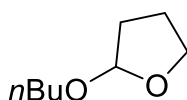

### 5y

Colorless liquid. 99% Isolated yield.  $^1\text{H}$  NMR (500 MHz,  $\text{CDCl}_3$ ):  $\delta$  5.1 (dd,  $J = 4.8$  Hz, 1.6 Hz, 1H), 3.90-3.82 (m, 2H), 3.65 (dt,  $J = 9.6$  Hz, 6.8 Hz, 1H), 3.36 (dt,  $J = 9.6$  Hz, 6.7 Hz, 1H), 2.03-1.77 (m, 4H), 1.56-1.51 (m, 2H), 1.39-1.31 (m, 2H), 0.91 (t,  $J = 7.4$  Hz, 3H).  $^{13}\text{C}$  NMR (125 MHz,  $\text{CDCl}_3$ ):  $\delta$  103.9, 67.1, 66.9, 32.5, 32.0, 23.7, 19.5, 14.0. QEFMS calcd for  $[\text{C}_8\text{H}_{16}\text{O}_2\text{Na}]^+$ : 167.10425, found: 167.10419.

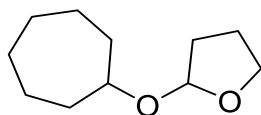**5z**

Colorless liquid. 92% Isolated yield.  $^1\text{H NMR}$  (500 MHz,  $\text{CDCl}_3$ ):  $\delta$  5.20 (d,  $J = 4.8$  1H), 3.89-3.79 (m, 2H), 3.69 (sept,  $J = 4.3$ , 1H), 2.02-1.93 (m, 1H), 1.92-1.74 (m, 5H), 1.64-1.46 (m, 8H), 1.40-1.33 (m, 2H).  $^{13}\text{C NMR}$  (125 MHz,  $\text{CDCl}_3$ ):  $\delta$  102.0, 76.9, 66.6, 35.9, 33.8, 32.7, 28.4, 28.2, 23.7, 23.2, 23.0. QEFMS calcd for  $[\text{C}_{11}\text{H}_{20}\text{O}_2\text{Na}]^+$ : 207.13555, found: 207.13549.

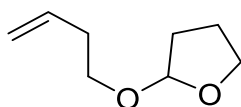**5aa**

Colorless liquid. 94% Isolated yield.  $^1\text{H NMR}$  (500 MHz,  $\text{CDCl}_3$ ):  $\delta$  5.85-5.77 (m, 1H), 5.12-5.07 (m, 2H), 5.03-5.01 (m, 1H), 3.87 (dq,  $J = 18.5$  Hz, 7.9 Hz, 2H), 3.87 (dt,  $J = 13.9$  Hz, 6.9 Hz, 1H), 3.43 (dt,  $J = 9.6$  Hz, 6.9 Hz, 1H), 2.32 (q,  $J = 6.8$  Hz, 2H), 2.02-1.78 (m, 4H).  $^{13}\text{C NMR}$  (125 MHz,  $\text{CDCl}_3$ ):  $\delta$  135.5, 116.3, 103.9, 67.0, 66.6, 34.3, 32.5, 23.6. QEFMS calcd for  $[\text{C}_8\text{H}_{14}\text{O}_2\text{Na}]^+$ : 165.08860, found: 165.08851.

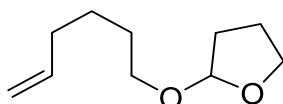**5ab**

Colorless liquid. 99% Isolated yield.  $^1\text{H NMR}$  (500 MHz,  $\text{CDCl}_3$ ):  $\delta$  5.84-5.75 (m, 1H), 5.09 (dd,  $J = 1.5$  Hz, 4.7 Hz, 1H), 5.01-4.97 (m, 1H), 4.94-4.91 (m, 1H), 3.90-3.82 (m, 2H), 3.64 (dt,  $J = 6.8$  Hz, 9.6 Hz, 1H), 3.36 (dt,  $J = 6.8$  Hz, 9.6 Hz, 1H), 2.06 (q,  $J = 7.3$  Hz, 2H), 2.01-1.81 (m, 4H), 1.57 (quin,  $J = 6.6$  Hz, 2H), 1.42 (quin,  $J = 7.3$  Hz, 2H).  $^{13}\text{C NMR}$  (125 MHz,  $\text{CDCl}_3$ ):  $\delta$  138.9, 114.6, 103.9, 67.1, 66.9, 33.6, 32.4, 29.3, 25.6, 23.6. QEFMS calcd for  $[\text{C}_{10}\text{H}_{18}\text{O}_2\text{Na}]^+$ : 193.11990, found: 193.11995.



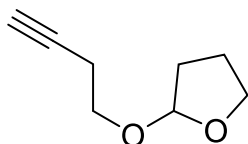

### 5ac

Colorless liquid. 97% Isolated yield.  $^1\text{H}$  NMR (500 MHz,  $\text{CDCl}_3$ ):  $\delta$  5.14 (t,  $J = 2.8$  Hz, 1H), 3.92-3.83 (m, 2H), 3.77-3.72 (m, 1H), 3.56-3.51 (m, 1H), 2.44 (sext,  $J = 2.5$  Hz, 2H), 2.03-1.95 (m, 2H), 1.93-1.89 (m, 2H), 1.85-1.77 (m, 1H).  $^{13}\text{C}$  NMR (125 MHz,  $\text{CDCl}_3$ ):  $\delta$  104.0, 81.6, 69.2, 67.1, 65.3, 32.4, 23.5, 20.1. QEFMS calcd for  $[\text{C}_8\text{H}_{12}\text{O}_2\text{Na}]^+$ : 163.07295, found: 163.07270.

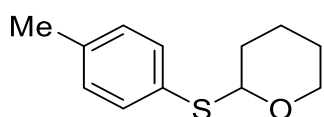

### 6a

Colorless liquid. 88% Isolated yield.  $^1\text{H}$  NMR (400 MHz,  $\text{CDCl}_3$ ):  $\delta$  7.39 (d,  $J = 8.0$  Hz, 2H), 7.11 (d,  $J = 7.9$  Hz, 2H), 5.14 (dd,  $J = 6.1, 2.1$  Hz, 1H), 4.20-4.15 (m, 1H), 3.59-3.54 (m, 1H), 2.32 (s, 3H), 2.05-1.98 (m, 1H), 1.90-1.77 (m, 2H), 1.68-1.58 (m, 3H).  $^{13}\text{C}$  NMR (100 MHz,  $\text{CDCl}_3$ ):  $\delta$  137.1, 131.8, 131.5, 129.7, 85.8, 64.7, 31.7, 25.7, 21.8, 21.2. QEFMS calcd for  $[\text{C}_{12}\text{H}_{16}\text{OSNa}]^+$ : 231.08141, found: 231.08107.

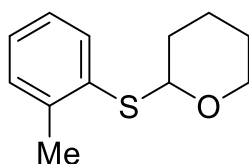

### 6b

Colorless liquid. 89% Isolated yield.  $^1\text{H}$  NMR (400 MHz,  $\text{CDCl}_3$ ):  $\delta$  7.56-7.54 (m, 1H), 7.18-7.10 (m, 3H), 5.21 (dd,  $J = 5.6$  Hz, 1.8 Hz, 1H), 4.20-4.14 (m, 1H), 3.63-3.58 (m, 1H), 2.40 (s, 3H), 2.09-2.02 (m, 1H), 1.95-1.84 (m, 2H), 1.71-1.59 (m, 3H).  $^{13}\text{C}$  NMR (100 MHz,  $\text{CDCl}_3$ ):  $\delta$  138.3, 135.1, 130.4, 130.1, 126.6, 126.5, 84.6, 64.7, 31.9, 25.7, 21.8, 20.9. QEFMS calcd for  $[\text{C}_{12}\text{H}_{16}\text{OSNa}]^+$ : 231.08141, found: 231.08113.

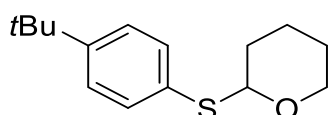

### 6c

Colorless liquid. 96% Isolated yield.  $^1\text{H}$  NMR (400 MHz,  $\text{CDCl}_3$ ):  $\delta$  7.42 (d,  $J = 8.5$  Hz, 2H), 7.31 (d,  $J = 8.5$  Hz, 2H), 5.17 (d,  $J = 9.6$  Hz, 1H), 4.21-4.16 (m, 1H), 3.61-

3.55 (m, 1H), 2.06-1.99 (m, 1H), 1.91-1.79 (m, 2H), 1.68-1.58 (m, 3H), 1.30 (s, 9H).  $^{13}\text{C}$  NMR (100 MHz,  $\text{CDCl}_3$ ):  $\delta$  150.1, 131.8, 131.2, 126.0, 85.7, 64.6, 34.6, 31.7, 31.4, 25.7, 21.8. QEFMS calcd for  $[\text{C}_{15}\text{H}_{22}\text{OSNa}]^+$ : 273.12836, found: 273.12806.

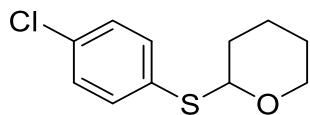

### 6d

Colorless liquid. 79% Isolated yield.  $^1\text{H}$  NMR (500 MHz,  $\text{CDCl}_3$ ):  $\delta$  7.40 (d,  $J = 8.5$  Hz, 2H), 7.25 (d,  $J = 8.6$  Hz, 2H), 5.17 (t,  $J = 5.8$  Hz, 1H), 4.17-4.13 (m, 1H), 3.60-3.56 (m, 1H), 2.05-1.99 (m, 1H), 1.88-1.78 (m, 2H), 1.68-1.60 (m, 3H).  $^{13}\text{C}$  NMR (125 MHz,  $\text{CDCl}_3$ ):  $\delta$  134.0, 132.9, 132.3, 129.0, 85.4, 64.6, 31.6, 25.6, 21.7. QEFMS calcd for  $[\text{C}_{11}\text{H}_{13}\text{ClOSNa}]^+$ : 251.02678, found: 251.02649.

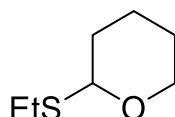

### 6e

Colorless liquid. 99% Isolated yield.  $^1\text{H}$  NMR (500 MHz,  $\text{CDCl}_3$ ):  $\delta$  4.87 (dd,  $J = 6.7$  Hz, 3.1 Hz, 1H), 4.11-4.07 (m, 1H), 3.53-3.48 (m, 1H), 2.72-2.54 (m, 2H), 1.95-1.90 (m, 1H), 1.85-1.80 (m, 1H), 1.71-1.65 (m, 1H), 1.61-1.53 (m, 3H), 1.28 (t,  $J = 7.4$  Hz, 3H).  $^{13}\text{C}$  NMR (125 MHz,  $\text{CDCl}_3$ ):  $\delta$  82.1, 64.9, 31.6, 25.8, 24.5, 22.0, 15.2. QEFMS calcd for  $[\text{C}_7\text{H}_{14}\text{SONa}]^+$ : 169.06576, found: 169.06565.

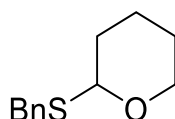

### 6f

Colorless liquid. 97% Isolated yield.  $^1\text{H}$  NMR (400 MHz,  $\text{CDCl}_3$ ):  $\delta$  7.26-7.21 (m, 4H), 7.18-7.14 (m, 1H), 4.63 (dd,  $J = 6.4$  Hz, 2.7 Hz, 1H), 4.07-4.02 (m, 1H), 3.78 (d,  $J = 13.2$  Hz, 1H), 3.64 (d,  $J = 13.2$  Hz, 1H), 3.46-3.40 (m, 1H), 1.82-1.68 (m, 2H), 1.60-1.41 (m, 4H).  $^{13}\text{C}$  NMR (100 MHz,  $\text{CDCl}_3$ ):  $\delta$  138.7, 129.1, 128.6, 126.9, 80.6, 64.4, 34.0, 30.9, 25.8, 21.7. QEFMS calcd for  $[\text{C}_{12}\text{H}_{16}\text{OSNa}]^+$ : 231.08141, found: 231.08119.

### 3. Catalyst stability test

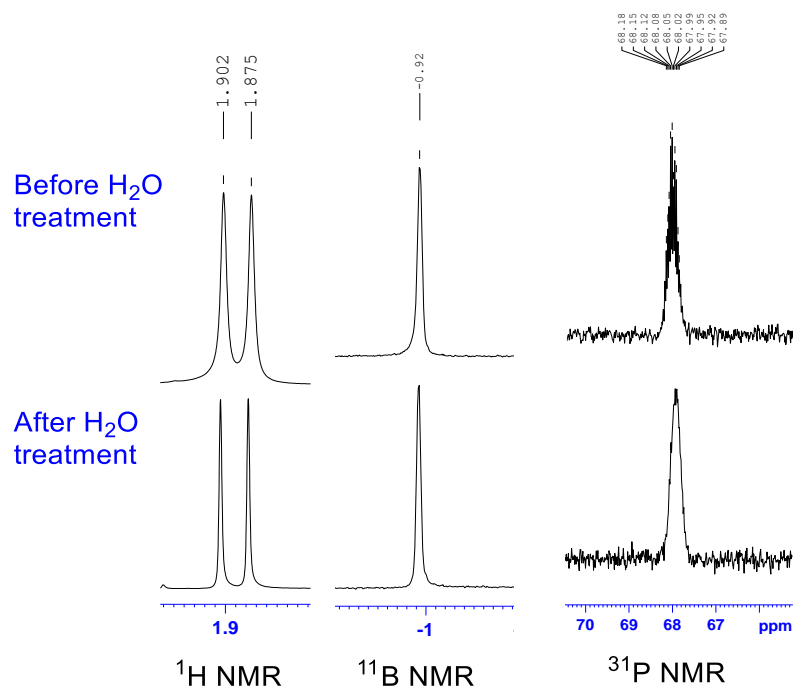

**Figure S1.** NMR experiments of **TOB-1** before and after treatment with water

*Note: TOB-1 catalyst (0.1 mmol) was dissolved in H<sub>2</sub>O (0.1 mL) and the solution was stirred at 23 °C for 12 h. Water was then removed under reduced pressure and the residue was dissolved in CDCl<sub>3</sub> for <sup>1</sup>H, <sup>11</sup>B, and <sup>31</sup>P NMR experiments.*

#### 4. Solvent screening and temperature effect on the chemoselectivity

**Table S1.** Solvent screening<sup>a</sup>

BnOH +   $\xrightarrow[\text{Solvent, 18 h, 23 }^\circ\text{C}]{\text{TOB-1 (0.1 mol\%)}}$  

| Entry | Solvent                           | Yield [%] |
|-------|-----------------------------------|-----------|
| 1     | CHCl <sub>3</sub> (no catalyst)   | 0         |
| 2     | CHCl <sub>3</sub>                 | 93        |
| 3     | CH <sub>2</sub> Cl <sub>2</sub>   | 40        |
| 4     | (CH <sub>2</sub> Cl) <sub>2</sub> | 50        |
| 5     | THF                               | 0         |
| 6     | Acetone                           | 14        |
| 7     | MeCN                              | 49        |
| 8     | <i>n</i> -Hexane                  | 17        |
| 9     | PhMe                              | 30        |

<sup>a</sup>Reaction were carried out with benzyl alcohols (0.20 mmol), 3,4-dihydro-2H-pyran (**2**) (0.24 mmol) and **TOB-1** (0.1 mol%) in solvent (0.4 mL) at 23 °C for 18 h. The yields were measured in NMR with dibromomethane as the internal standard.

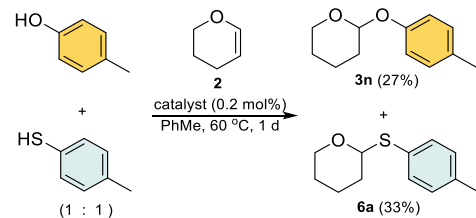

**Scheme S1.** Study on the temperature effect on the chemoselective acetalization

## 5. NMR titration experiment with TOB-1 and benzyl alcohol

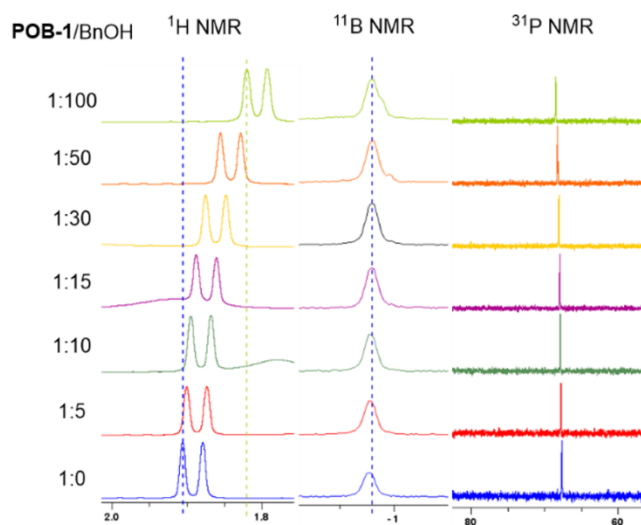

**Figure S2.** NMR titration experiment with **TOB-1** and benzyl alcohol

*Note: **TOB-1** catalyst (8.0 mg, 0.05 mmol, 1 equiv) was dissolved in  $\text{CDCl}_3$  (0.4 mL) and the  $^1\text{H}$ ,  $^{11}\text{B}$  and  $^{31}\text{P}$  NMR spectra were obtained. Different amount of benzyl alcohol was then added and the  $^1\text{H}$ ,  $^{11}\text{B}$  and  $^{31}\text{P}$  NMR were obtained after each addition.*

## 6. Comparison of the chemical shift of alcohols and thiols

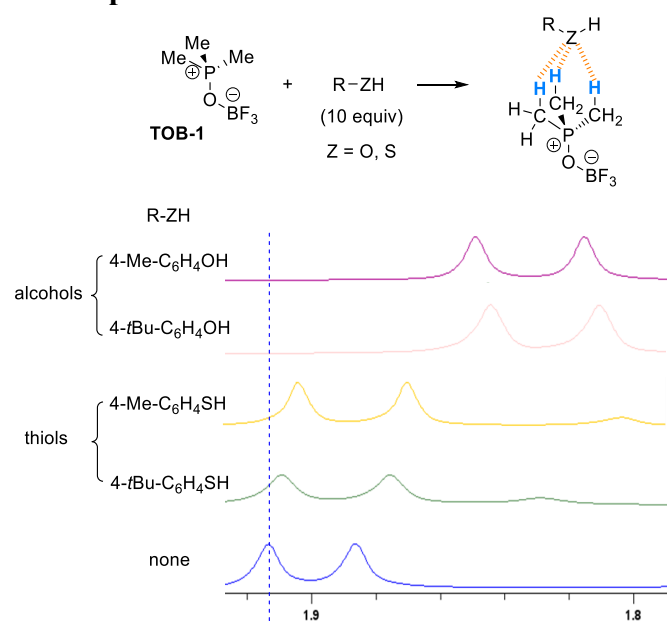

**Figure S3.** Comparison of the chemical shift of alcohols and thiols in the presence of **TOB-1**

*Note: **TOB-1** catalyst (8.0 mg, 0.05 mmol, 1 equiv) was dissolved in CDCl<sub>3</sub> (0.4 mL) and alcohol or thiol (0.5 mmol, 10 equiv) was added. <sup>1</sup>H NMR experiments were then carried out on these samples.*

## 7. X-ray crystal data of TOB-2

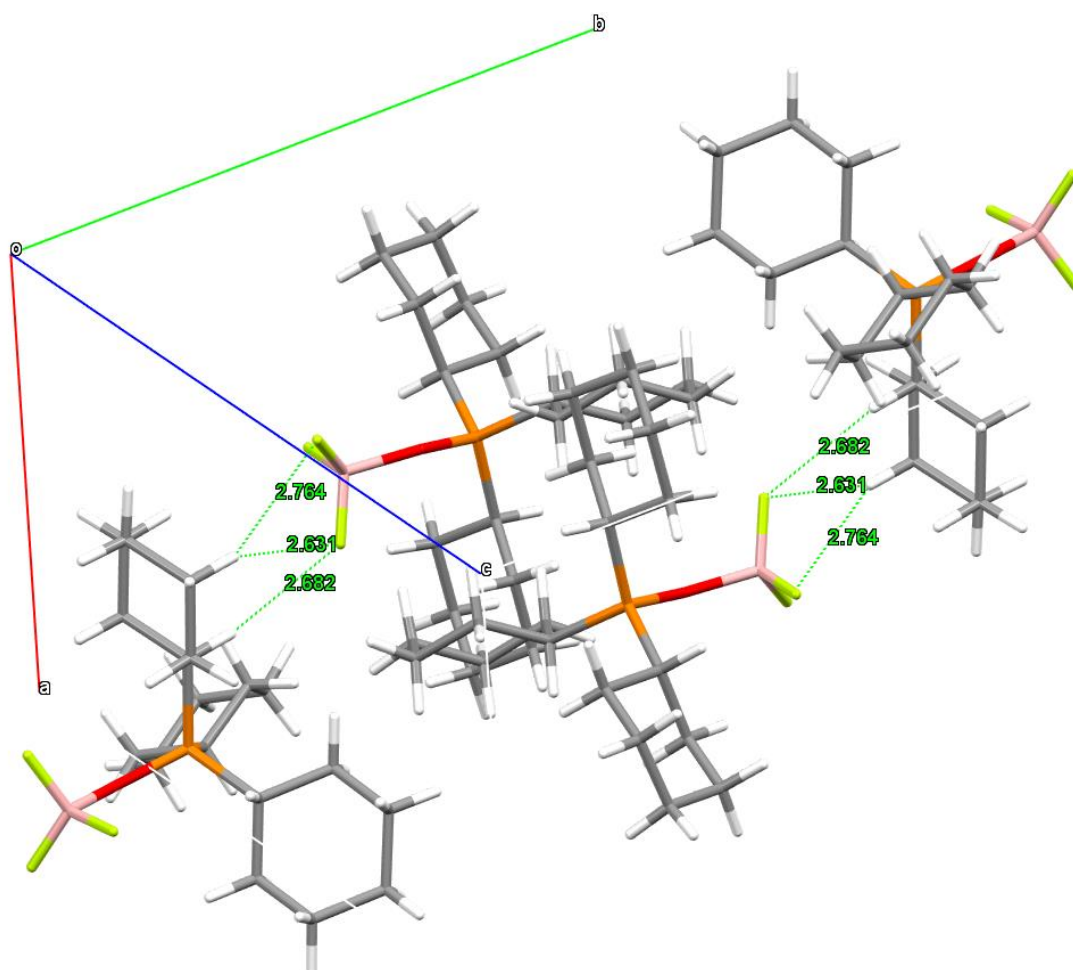

**Figure S4.** X-ray crystal packing of TOB-2 (CCDC 2209696)

Crystal data and structure refinement for **TOB-2**.

|                                   |                                             |                 |
|-----------------------------------|---------------------------------------------|-----------------|
| Identification code               | vinn1173pcy3obf3                            |                 |
| Empirical formula                 | C18 H33 B F3 O P                            |                 |
| Formula weight                    | 364.22                                      |                 |
| Temperature                       | 296(2) K                                    |                 |
| Wavelength                        | 0.71073 Å                                   |                 |
| Crystal system                    | Monoclinic                                  |                 |
| Space group                       | P2 <sub>1</sub> /c                          |                 |
| Unit cell dimensions              | a = 7.9919(7) Å                             | α = 90°.        |
|                                   | b = 13.6548(12) Å                           | β = 94.856(3)°. |
|                                   | c = 18.5379(18) Å                           | γ = 90°.        |
| Volume                            | 2015.7(3) Å <sup>3</sup>                    |                 |
| Z                                 | 4                                           |                 |
| Density (calculated)              | 1.200 Mg/m <sup>3</sup>                     |                 |
| Absorption coefficient            | 0.165 mm <sup>-1</sup>                      |                 |
| F(000)                            | 784                                         |                 |
| Crystal size                      | 0.400 x 0.300 x 0.200 mm <sup>3</sup>       |                 |
| Theta range for data collection   | 2.662 to 25.248°.                           |                 |
| Index ranges                      | -9<=h<=8, -16<=k<=16, -22<=l<=22            |                 |
| Reflections collected             | 20181                                       |                 |
| Independent reflections           | 3631 [R(int) = 0.0290]                      |                 |
| Completeness to theta = 25.242°   | 99.3 %                                      |                 |
| Absorption correction             | multi-scan                                  |                 |
| Max. and min. transmission        | 0.7456 and 0.6570                           |                 |
| Refinement method                 | Full-matrix least-squares on F <sup>2</sup> |                 |
| Data / restraints / parameters    | 3631 / 0 / 245                              |                 |
| Goodness-of-fit on F <sup>2</sup> | 1.056                                       |                 |
| Final R indices [I>2sigma(I)]     | R1 = 0.0469, wR2 = 0.1258                   |                 |
| R indices (all data)              | R1 = 0.0610, wR2 = 0.1410                   |                 |
| Extinction coefficient            | n/a                                         |                 |
| Largest diff. peak and hole       | 0.374 and -0.189 e.Å <sup>-3</sup>          |                 |



Atomic coordinates ( $\times 10^4$ ) and equivalent isotropic displacement parameters ( $\text{\AA}^2 \times 10^3$ )  
for **TOB-2**. U(eq) is defined as one third of the trace of the orthogonalized  $U^{ij}$  tensor.

|       | x        | y        | z        | U(eq)   |
|-------|----------|----------|----------|---------|
| B(1)  | 6916(4)  | 3907(3)  | 3335(2)  | 92(1)   |
| O(1)  | 5534(2)  | 4635(1)  | 3382(1)  | 64(1)   |
| P(1)  | 3688(1)  | 4789(1)  | 3121(1)  | 41(1)   |
| C(1)  | 3164(3)  | 6029(2)  | 3379(1)  | 53(1)   |
| C(2)  | 4279(4)  | 6443(2)  | 3993(2)  | 83(1)   |
| C(3)  | 3945(4)  | 7523(2)  | 4102(2)  | 90(1)   |
| C(4)  | 2090(5)  | 7714(2)  | 4178(2)  | 101(1)  |
| C(5)  | 983(4)   | 7291(2)  | 3588(2)  | 77(1)   |
| C(6)  | 1318(3)  | 6209(2)  | 3472(1)  | 59(1)   |
| C(7)  | 2363(2)  | 3908(1)  | 3522(1)  | 45(1)   |
| C(8)  | 2498(3)  | 2874(2)  | 3215(1)  | 59(1)   |
| C(9)  | 1327(3)  | 2175(2)  | 3571(2)  | 74(1)   |
| C(10) | 1648(4)  | 2176(2)  | 4389(2)  | 86(1)   |
| C(11) | 1546(3)  | 3193(2)  | 4695(1)  | 77(1)   |
| C(12) | 2726(3)  | 3893(2)  | 4348(1)  | 63(1)   |
| C(13) | 3405(3)  | 4703(1)  | 2146(1)  | 46(1)   |
| C(14) | 4599(3)  | 5383(2)  | 1778(1)  | 73(1)   |
| C(15) | 4412(4)  | 5244(2)  | 961(2)   | 85(1)   |
| C(16) | 2623(5)  | 5378(2)  | 656(1)   | 86(1)   |
| C(17) | 1449(4)  | 4715(2)  | 1018(1)  | 80(1)   |
| C(18) | 1598(3)  | 4857(2)  | 1834(1)  | 57(1)   |
| F(1)  | 6354(5)  | 3245(4)  | 2780(2)  | 105(2)  |
| F(2)  | 8272(6)  | 4347(5)  | 3165(6)  | 154(4)  |
| F(3)  | 7084(11) | 3387(6)  | 3951(3)  | 146(4)  |
| F(1') | 6682(18) | 3102(8)  | 3440(30) | 298(18) |
| F(2') | 7850(20) | 4271(15) | 2848(12) | 205(9)  |
| F(3') | 8027(18) | 4318(18) | 3929(9)  | 202(8)  |

Bond lengths [Å] and angles [°] for **TOB-2**.

---

|                  |            |
|------------------|------------|
| B(1)-F(1')       | 1.134(10)  |
| B(1)-F(2)        | 1.302(6)   |
| B(1)-F(2')       | 1.317(16)  |
| B(1)-F(3)        | 1.341(6)   |
| B(1)-F(1)        | 1.414(6)   |
| B(1)-F(3')       | 1.466(13)  |
| B(1)-O(1)        | 1.494(4)   |
| O(1)-P(1)        | 1.5275(14) |
| P(1)-C(7)        | 1.8045(19) |
| P(1)-C(13)       | 1.805(2)   |
| P(1)-C(1)        | 1.819(2)   |
| C(1)-C(2)        | 1.496(3)   |
| C(1)-C(6)        | 1.520(3)   |
| C(2)-C(3)        | 1.515(4)   |
| C(3)-C(4)        | 1.524(5)   |
| C(4)-C(5)        | 1.466(4)   |
| C(5)-C(6)        | 1.520(3)   |
| C(7)-C(8)        | 1.529(3)   |
| C(7)-C(12)       | 1.534(3)   |
| C(8)-C(9)        | 1.526(3)   |
| C(9)-C(10)       | 1.516(4)   |
| C(10)-C(11)      | 1.506(4)   |
| C(11)-C(12)      | 1.522(3)   |
| C(13)-C(18)      | 1.524(3)   |
| C(13)-C(14)      | 1.533(3)   |
| C(14)-C(15)      | 1.520(4)   |
| C(15)-C(16)      | 1.503(4)   |
| C(16)-C(17)      | 1.502(4)   |
| C(17)-C(18)      | 1.521(3)   |
| F(1')-B(1)-F(2') | 126.4(18)  |
| F(2)-B(1)-F(3)   | 115.2(5)   |
| F(2)-B(1)-F(1)   | 109.8(6)   |
| F(3)-B(1)-F(1)   | 106.5(5)   |
| F(1')-B(1)-F(3') | 110.0(16)  |
| F(2')-B(1)-F(3') | 91.6(10)   |
| F(1')-B(1)-O(1)  | 120.1(7)   |

|                   |            |
|-------------------|------------|
| F(2)-B(1)-O(1)    | 110.0(4)   |
| F(2')-B(1)-O(1)   | 104.6(8)   |
| F(3)-B(1)-O(1)    | 108.9(4)   |
| F(1)-B(1)-O(1)    | 106.1(3)   |
| F(3')-B(1)-O(1)   | 96.0(6)    |
| B(1)-O(1)-P(1)    | 140.5(2)   |
| O(1)-P(1)-C(7)    | 111.21(9)  |
| O(1)-P(1)-C(13)   | 110.18(10) |
| C(7)-P(1)-C(13)   | 109.96(9)  |
| O(1)-P(1)-C(1)    | 106.40(9)  |
| C(7)-P(1)-C(1)    | 110.83(10) |
| C(13)-P(1)-C(1)   | 108.17(10) |
| C(2)-C(1)-C(6)    | 112.0(2)   |
| C(2)-C(1)-P(1)    | 114.62(17) |
| C(6)-C(1)-P(1)    | 115.34(15) |
| C(1)-C(2)-C(3)    | 111.6(2)   |
| C(2)-C(3)-C(4)    | 111.3(3)   |
| C(5)-C(4)-C(3)    | 113.1(3)   |
| C(4)-C(5)-C(6)    | 112.8(2)   |
| C(5)-C(6)-C(1)    | 110.9(2)   |
| C(8)-C(7)-C(12)   | 110.24(17) |
| C(8)-C(7)-P(1)    | 113.54(14) |
| C(12)-C(7)-P(1)   | 110.66(14) |
| C(9)-C(8)-C(7)    | 110.6(2)   |
| C(10)-C(9)-C(8)   | 112.0(2)   |
| C(11)-C(10)-C(9)  | 111.5(2)   |
| C(10)-C(11)-C(12) | 111.4(2)   |
| C(11)-C(12)-C(7)  | 111.00(19) |
| C(18)-C(13)-C(14) | 110.66(19) |
| C(18)-C(13)-P(1)  | 113.92(14) |
| C(14)-C(13)-P(1)  | 112.13(16) |
| C(15)-C(14)-C(13) | 110.8(2)   |
| C(16)-C(15)-C(14) | 111.7(2)   |
| C(17)-C(16)-C(15) | 111.6(2)   |
| C(16)-C(17)-C(18) | 111.6(2)   |
| C(17)-C(18)-C(13) | 110.6(2)   |

---

Symmetry transformations used to generate equivalent atoms:

Anisotropic displacement parameters ( $\text{\AA}^2 \times 10^3$ ) for **TOB-2**. The anisotropic displacement factor exponent takes the form:  $-2\pi^2 [ h^2 a^{*2} U^{11} + \dots + 2 h k a^* b^* U^{12} ]$

|       | U <sup>11</sup> | U <sup>22</sup> | U <sup>33</sup> | U <sup>23</sup> | U <sup>13</sup> | U <sup>12</sup> |
|-------|-----------------|-----------------|-----------------|-----------------|-----------------|-----------------|
| B(1)  | 43(2)           | 115(3)          | 117(3)          | 22(3)           | 8(2)            | 24(2)           |
| O(1)  | 33(1)           | 78(1)           | 81(1)           | 3(1)            | -3(1)           | 5(1)            |
| P(1)  | 31(1)           | 45(1)           | 46(1)           | 1(1)            | 2(1)            | 0(1)            |
| C(1)  | 50(1)           | 48(1)           | 61(1)           | -6(1)           | 5(1)            | -5(1)           |
| C(2)  | 76(2)           | 75(2)           | 92(2)           | -24(2)          | -21(2)          | -8(1)           |
| C(3)  | 116(3)          | 64(2)           | 86(2)           | -25(2)          | -11(2)          | -20(2)          |
| C(4)  | 136(3)          | 72(2)           | 93(2)           | -32(2)          | 5(2)            | 12(2)           |
| C(5)  | 85(2)           | 62(2)           | 86(2)           | -12(1)          | 18(2)           | 16(1)           |
| C(6)  | 56(1)           | 60(1)           | 63(1)           | -13(1)          | 7(1)            | 9(1)            |
| C(7)  | 36(1)           | 49(1)           | 48(1)           | 8(1)            | 1(1)            | 1(1)            |
| C(8)  | 58(1)           | 49(1)           | 70(1)           | 4(1)            | 3(1)            | -3(1)           |
| C(9)  | 65(2)           | 56(1)           | 102(2)          | 17(1)           | 2(1)            | -12(1)          |
| C(10) | 69(2)           | 85(2)           | 102(2)          | 46(2)           | 2(2)            | -9(1)           |
| C(11) | 68(2)           | 100(2)          | 62(2)           | 31(1)           | 8(1)            | -6(1)           |
| C(12) | 64(1)           | 76(2)           | 49(1)           | 14(1)           | 1(1)            | -6(1)           |
| C(13) | 50(1)           | 45(1)           | 46(1)           | 1(1)            | 10(1)           | 2(1)            |
| C(14) | 70(2)           | 86(2)           | 67(2)           | 14(1)           | 22(1)           | -15(1)          |
| C(15) | 115(3)          | 80(2)           | 66(2)           | 15(1)           | 43(2)           | -1(2)           |
| C(16) | 132(3)          | 77(2)           | 48(1)           | 13(1)           | 10(2)           | 12(2)           |
| C(17) | 99(2)           | 88(2)           | 50(1)           | 2(1)            | -9(1)           | -6(2)           |
| C(18) | 58(1)           | 65(1)           | 47(1)           | 2(1)            | -1(1)           | -2(1)           |
| F(1)  | 89(2)           | 108(3)          | 119(3)          | -24(2)          | 16(2)           | 41(2)           |
| F(2)  | 31(2)           | 138(4)          | 295(11)         | 28(5)           | 26(3)           | -8(2)           |
| F(3)  | 147(5)          | 176(8)          | 111(3)          | 55(3)           | -11(3)          | 76(5)           |
| F(1') | 116(10)         | 57(5)           | 730(50)         | 71(18)          | 90(20)          | 8(5)            |
| F(2') | 121(11)         | 309(19)         | 200(13)         | -16(11)         | 104(11)         | 67(12)          |
| F(3') | 115(8)          | 270(20)         | 203(12)         | -2(12)          | -84(8)          | 58(11)          |

Hydrogen coordinates ( $\times 10^4$ ) and isotropic displacement parameters ( $\text{\AA}^2 \times 10^3$ ) for **TOB-2**.

|        | x    | y    | z    | U(eq) |
|--------|------|------|------|-------|
| H(1A)  | 3396 | 6431 | 2961 | 63    |
| H(2A)  | 5443 | 6352 | 3897 | 99    |
| H(2B)  | 4095 | 6090 | 4434 | 99    |
| H(3A)  | 4295 | 7889 | 3692 | 108   |
| H(3B)  | 4602 | 7750 | 4533 | 108   |
| H(4A)  | 1796 | 7444 | 4634 | 121   |
| H(4B)  | 1904 | 8416 | 4192 | 121   |
| H(5A)  | 1136 | 7643 | 3144 | 92    |
| H(5B)  | -175 | 7375 | 3695 | 92    |
| H(6A)  | 644  | 5982 | 3045 | 71    |
| H(6B)  | 992  | 5839 | 3884 | 71    |
| H(7A)  | 1198 | 4123 | 3417 | 54    |
| H(8A)  | 2206 | 2886 | 2697 | 71    |
| H(8B)  | 3646 | 2644 | 3300 | 71    |
| H(9A)  | 172  | 2365 | 3439 | 89    |
| H(9B)  | 1482 | 1517 | 3391 | 89    |
| H(10A) | 827  | 1760 | 4595 | 103   |
| H(10B) | 2753 | 1906 | 4524 | 103   |
| H(11A) | 1836 | 3173 | 5213 | 92    |
| H(11B) | 403  | 3432 | 4612 | 92    |
| H(12A) | 3879 | 3691 | 4471 | 75    |
| H(12B) | 2591 | 4547 | 4538 | 75    |
| H(13A) | 3708 | 4033 | 2021 | 56    |
| H(14A) | 4355 | 6058 | 1893 | 88    |
| H(14B) | 5748 | 5245 | 1960 | 88    |
| H(15A) | 5120 | 5713 | 738  | 102   |
| H(15B) | 4787 | 4592 | 845  | 102   |
| H(16A) | 2291 | 6054 | 721  | 103   |
| H(16B) | 2540 | 5242 | 141  | 103   |
| H(17A) | 1702 | 4039 | 908  | 96    |
| H(17B) | 304  | 4848 | 827  | 96    |
| H(18A) | 870  | 4395 | 2053 | 68    |
| H(18B) | 1238 | 5514 | 1948 | 68    |

## 8. Kinetic Study of the Acetalization Reaction

Four NMR tubes charged with CDCl<sub>3</sub> (0.4 mL) and internal standard mesitylene (27.8 μL, 0.2 mmol, 1 equiv). Different amounts of benzyl alcohol, 3,4-dihydropyran **2** and **TOB-1** were added to the four NMR tubes according to the following table.

| Entry      | Benzyl alcohol       | 3,4-Dihydropyran    | TOB-1     |
|------------|----------------------|---------------------|-----------|
| <b>I</b>   | 20.7 μL(1 equiv.)    | 18.2 μL (1 equiv.)  | 1 mol %   |
| <b>II</b>  | 10.4 μL (0.5 equiv.) | 18.2 μL (1 equiv.)  | 1 mol %   |
| <b>III</b> | 20.7 μL (1 equiv.)   | 9.1 μL (0.5 equiv.) | 1 mol %   |
| <b>IV</b>  | 20.7 μL (1 equiv.)   | 18.2 μL (1 equiv.)  | 0.5 mol % |

The reactions were monitored by <sup>1</sup>H NMR experiments in 1.5 hour. The NMR yield of the product were recorded and the curves of the amount of acetal product against time were plotted. A polynomial trendline of the graph was obtained and the initial rates were determined (Figure S5-S7). The rate orders of different reactants are summarized in Table S2.

**Table S2.** Rate order of different Reactants

| Reactants                 | Rate Order |
|---------------------------|------------|
| Benzyl alcohol            | 1.048      |
| 3,4-Dihydropyran <b>2</b> | 1.034      |
| <b>TOB-1</b>              | 1.040      |

(i) Kinetic study of benzyl alcohol

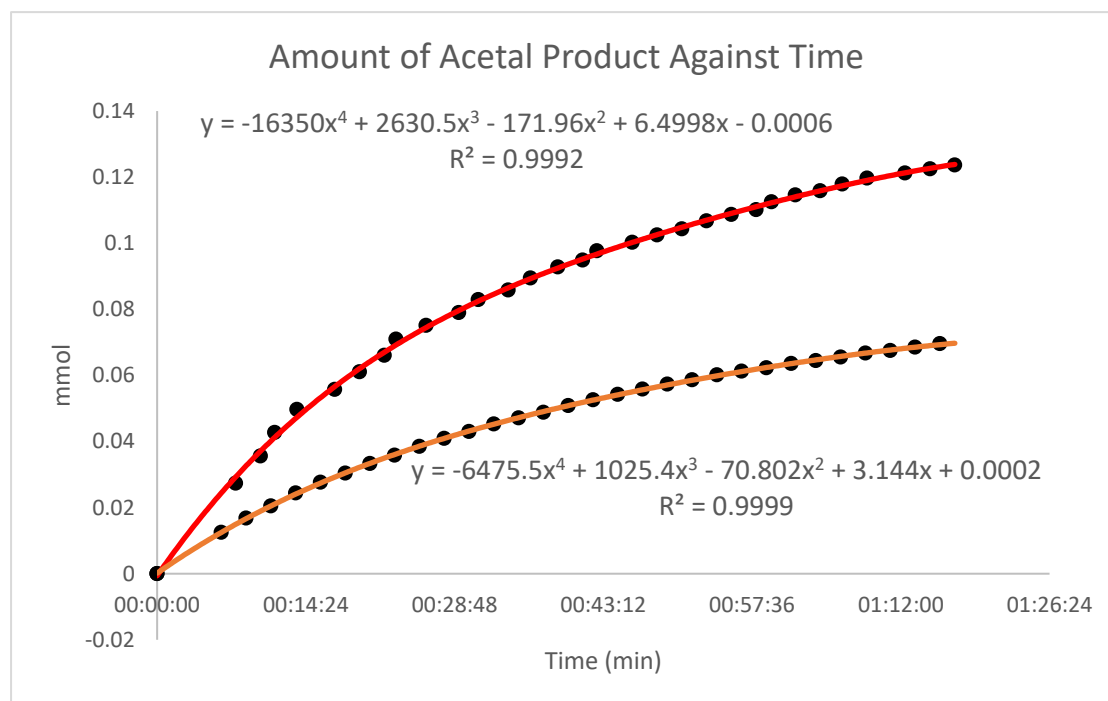

**Figure S5.** Kinetic study of benzyl alcohol

$$\begin{aligned}
 \text{Rate I} &= k[\text{BnOH}]^x [\text{3,4-Dihydropyran}]^y [\text{TOB-1}]^z \\
 &= \frac{dy}{dt} \text{ (at } t=0) \\
 &= 6.4998
 \end{aligned}$$

$$\begin{aligned}
 \text{Rate II} &= k \frac{1}{2^x} [\text{BnOH}]^x [\text{3,4-Dihydropyran}]^y [\text{TOB-1}]^z \\
 &= \frac{dy}{dt} \text{ (at } t=0) \\
 &= 3.144
 \end{aligned}$$

$$\frac{\text{Rate I}}{\text{Rate II}} = 2^x$$

$$x = 1.048$$

Rate Order of benzyl alcohol = 1.048

(ii) Kinetic study of 3,4-dihydropyran **2**

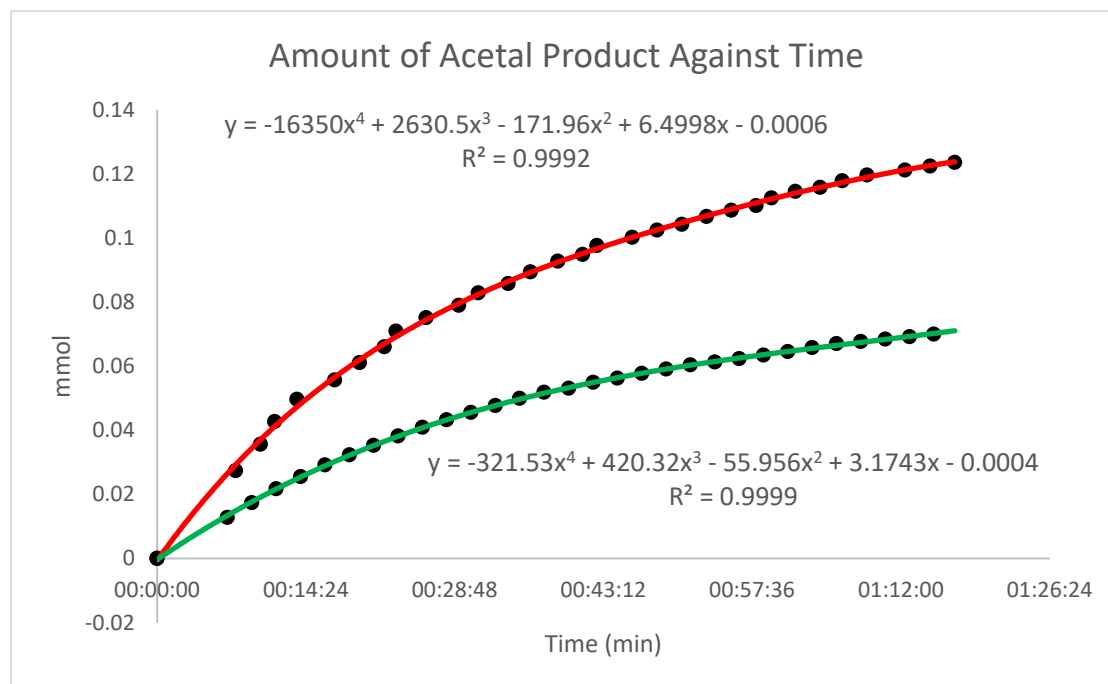

**Figure S6.** Kinetic study of 3,4-dihydropyran **2**

$$\begin{aligned}
 \text{Rate I} &= k[\text{BnOH}]^x [3,4\text{-Dihydropyran}]^y [\text{TOB-1}]^z \\
 &= \frac{dy}{dt} \text{ (at } t=0) \\
 &= 6.4998
 \end{aligned}$$

$$\begin{aligned}
 \text{Rate III} &= k[\text{BnOH}]^x \frac{1}{2^y} [3,4\text{-Dihydropyran}]^y [\text{TOB-1}]^z \\
 &= \frac{dy}{dt} \text{ (at } t=0) \\
 &= 3.1743
 \end{aligned}$$

$$\frac{\text{Rate I}}{\text{Rate III}} = 2^y$$

$$y = 1.034$$

Kinetic Order of 3,4-dihydropyran **2** = 1.034



(iii) Kinetic study of catalyst **TOB-1**

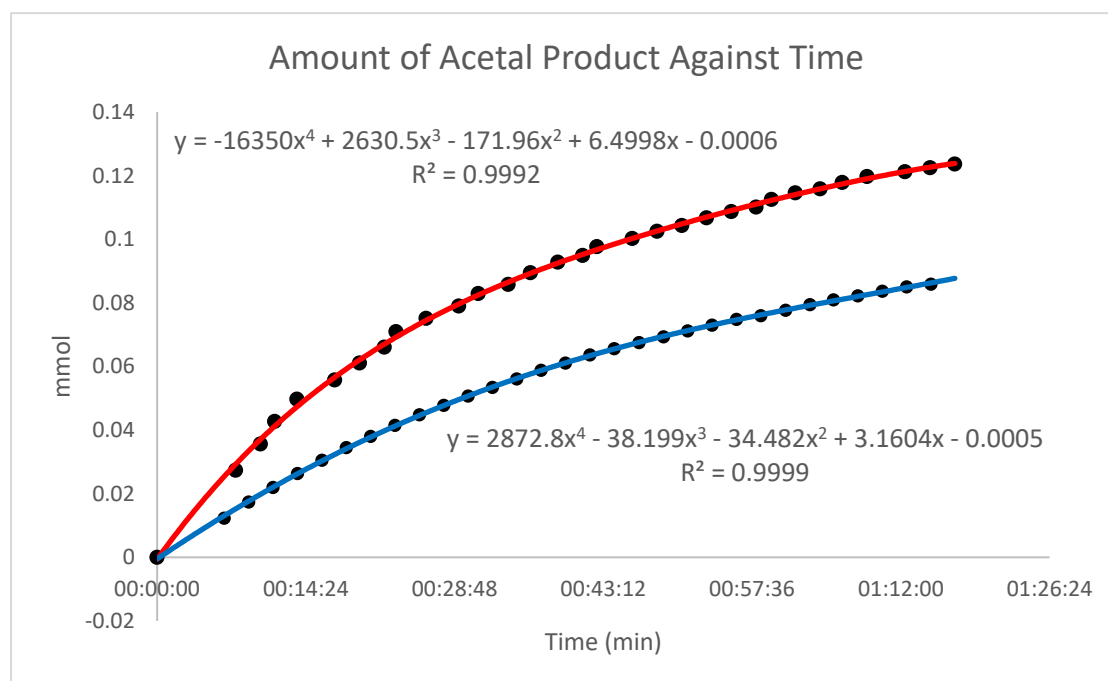

**Figure S7.** Kinetic study of catalyst **TOB-1**

$$\begin{aligned}
 \text{Rate I} &= k[\text{BnOH}]^x[\text{3,4-Dihydropyran}]^y[\text{TOB-1}]^z \\
 &= \frac{dy}{dt} \text{ (at } t=0) \\
 &= 6.4998
 \end{aligned}$$

$$\begin{aligned}
 \text{Rate IV} &= k[\text{BnOH}]^x[\text{3,4-Dihydropyran}]^y \frac{1}{2^z} [\text{TOB-1}]^z \\
 &= \frac{dy}{dt} \text{ (at } t=0) \\
 &= 3.1604
 \end{aligned}$$

$$\frac{\text{Rate I}}{\text{Rate IV}} = 2^z$$

$$z = 1.040$$

Kinetic Order of **TOB-1** = 1.040

## 9. Computational studies

All Density Functional Theory (DFT) calculations were carried out using M06-2X hybrid functional<sup>2</sup> with Grimme D3 dispersion correction.<sup>3</sup> These systems were studied in SMD solvents (chloroform and toluene)<sup>4</sup> with Gaussian 16 (ver. C.02).<sup>5</sup> Their geometries were optimized with 6-311G(d) basis set, while the single-point energies, electrostatic potential calculations, and NBO analyses were performed with aug-cc-pVTZ basis set. For binding energy calculations, basis set superposition errors (BSSE) were handled by a counterpoise procedure.<sup>6</sup> Based on the electrostatic potential (ESP) map of **TOB-1**, positive charges are shown to be localized at the methyl groups and phosphonium centre, suggesting that these positions are potential active sites of the catalyst. To investigate the interactions of the trilateral complexes formed between **2**, **TOB-1**, and the alcohol/thiol, configurational searches were performed by initially placing **2** and the alcohol/thiol near the potential active sites at methyl groups and phosphonium centre of **TOB-1**. Several optimized configurations were obtained, and the one with strongest binding between **2** and the complex of the other two species was selected for further study. Additional optimizations of the complexes were done with different implicit SMD solvents to study the solvent effect on the O/S chemoselectivity in the acetalization. The E(2) stabilization energies were computed with second order perturbation theory analysis in NBO basis.<sup>7</sup> Atoms In Molecules (AIM)<sup>8</sup> analysis and electrostatic potential (ESP) map generation was done by Multiwfn 3.8.<sup>9</sup>

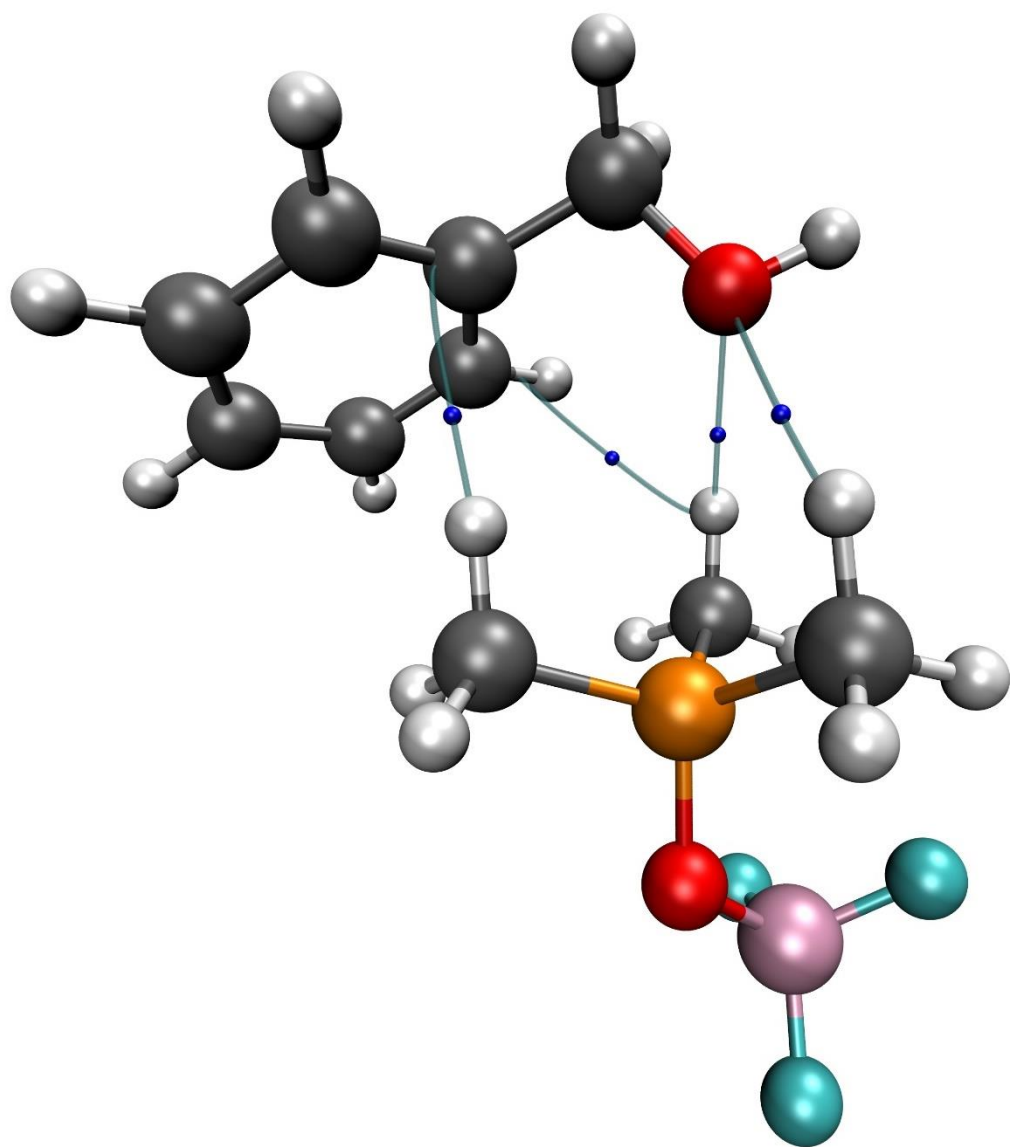

**Figure S8.** AIM bond paths in complex A

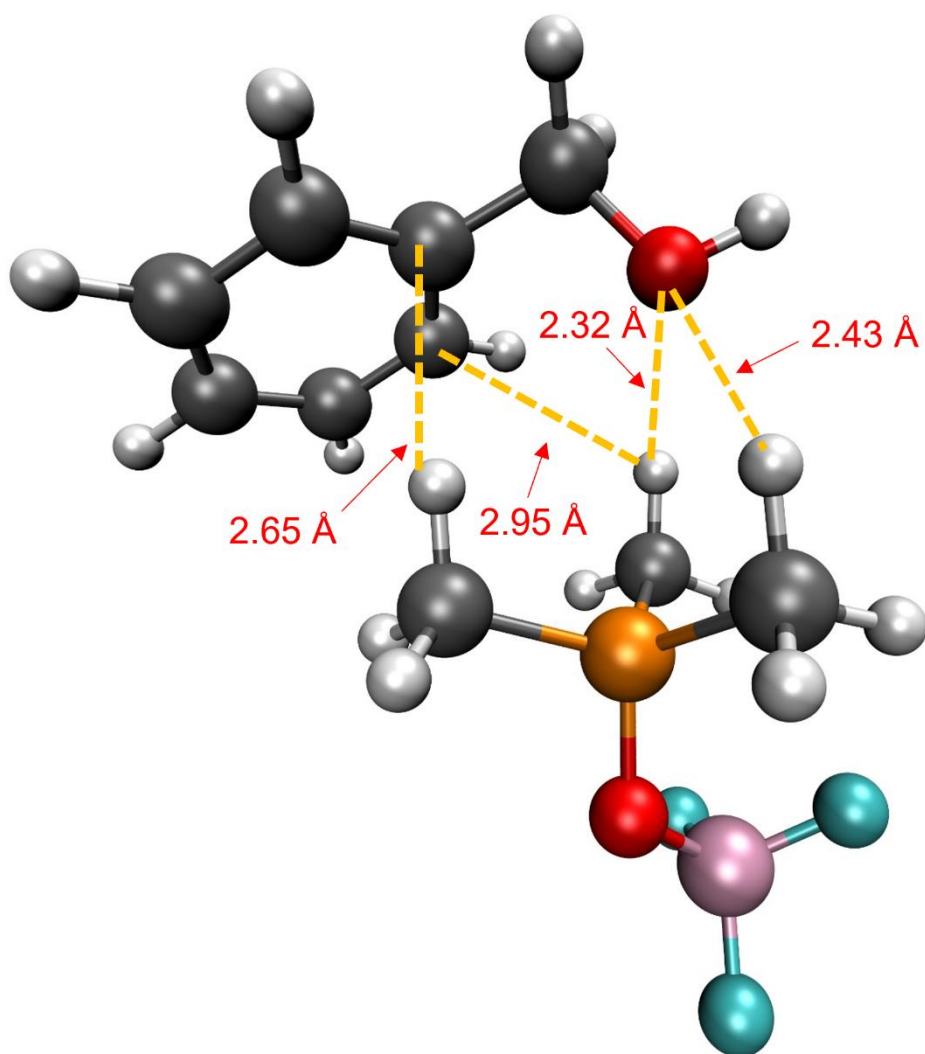

**Figure S9.** Snapshot of the optimized structure of complex **A**

*Note: Binding energy between **TOB-1** and **BnOH** (M06-2X/aug-cc-pVTZ, Grimme D3 dispersion, SMD(chloroform)) = -5.12 kcal/mol*

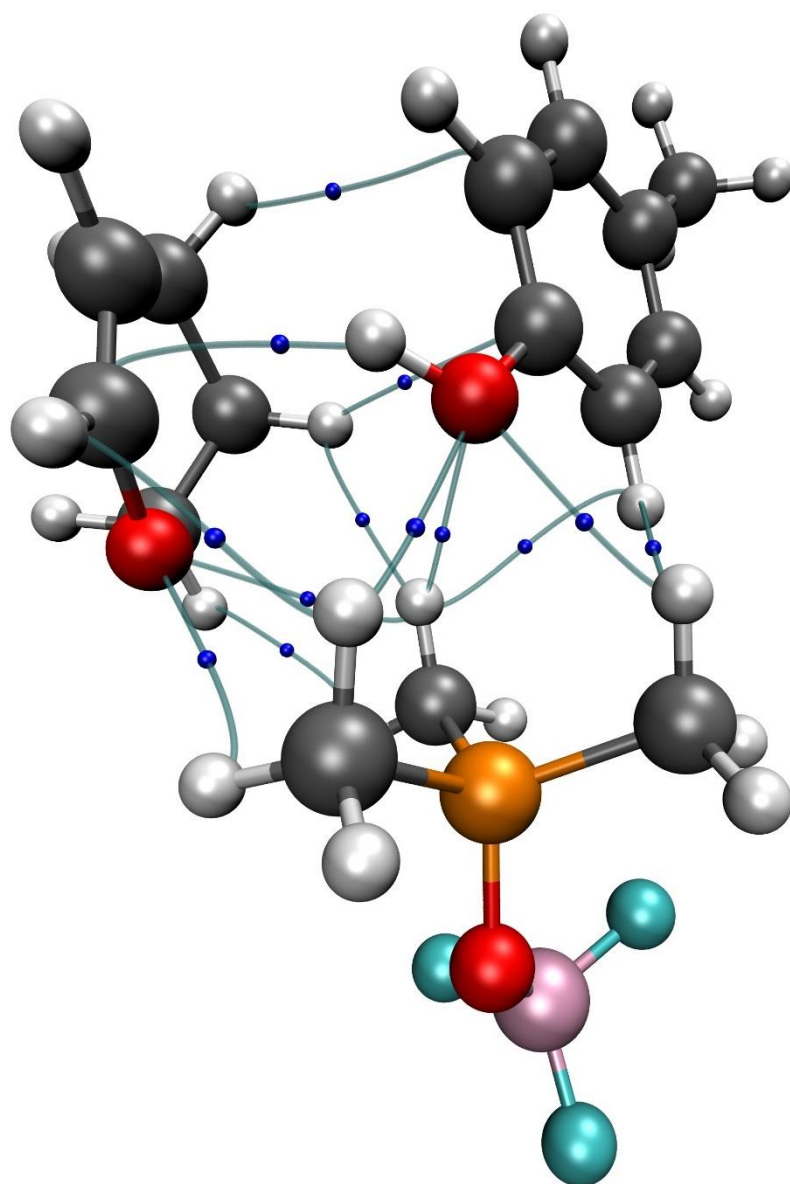

**Figure S10.** AIM bond paths in complex **B**

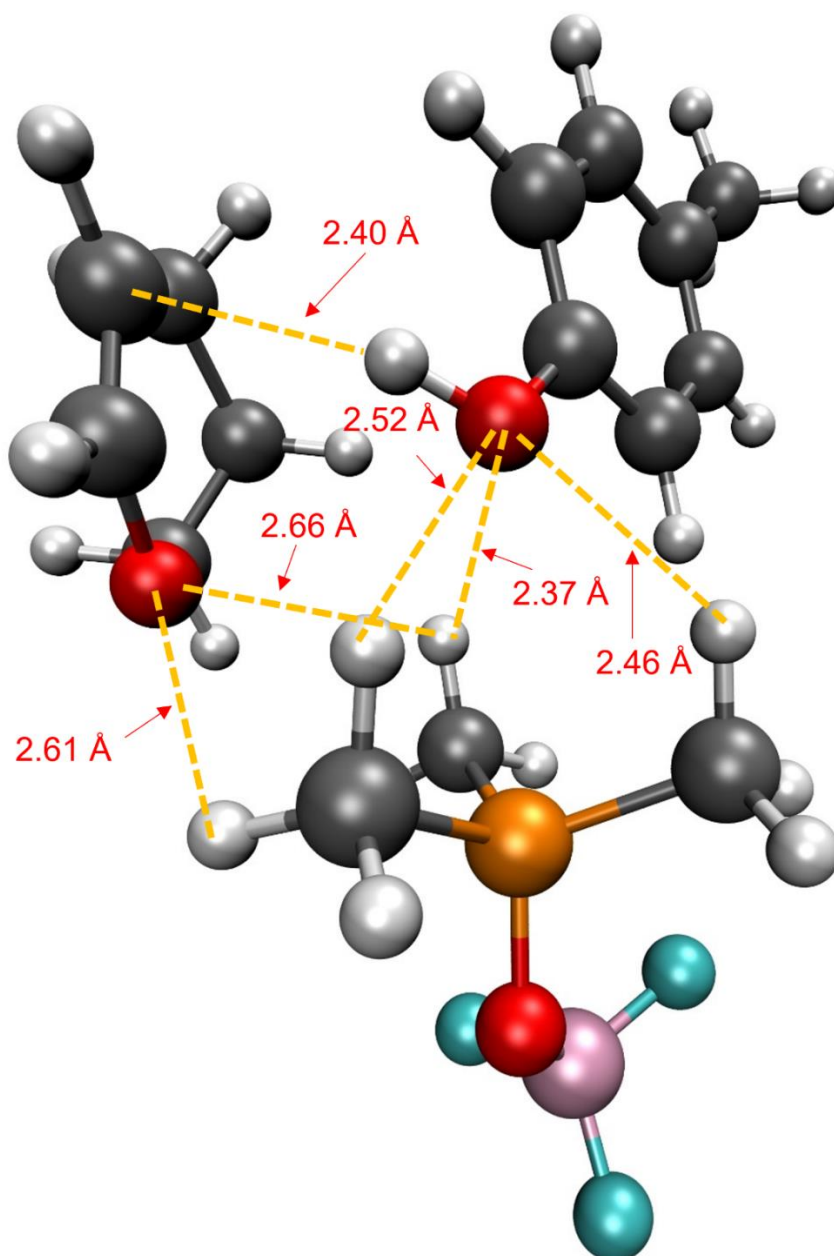

**Figure S11.** Snapshot of the optimized structure of complex **B**

*Note: Binding energy between **2** and the complex of **TOB-1** and 4-Me-C<sub>6</sub>H<sub>4</sub>-OH (M06-2X/aug-cc-pVTZ, Grimme D3 dispersion, SMD(toluene)) = -7.97 kcal/mol*

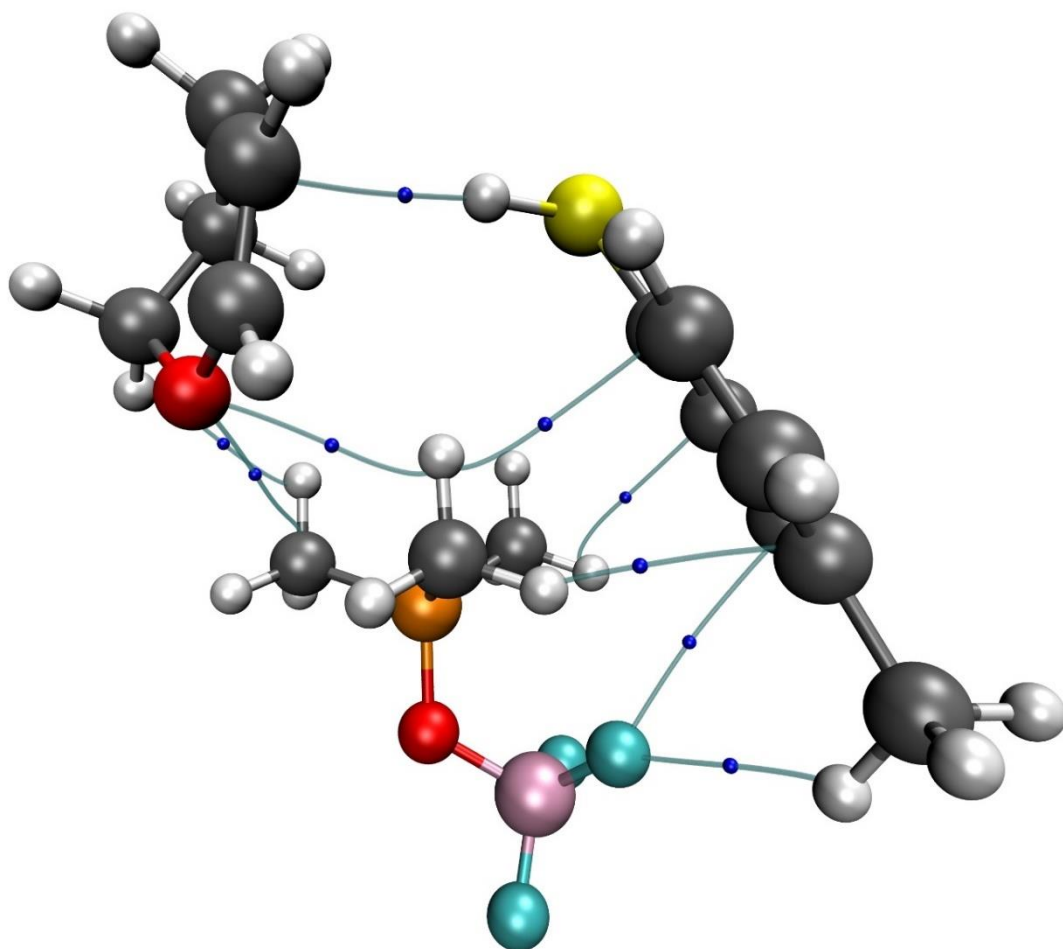

**Figure S12.** AIM bond paths in complex C

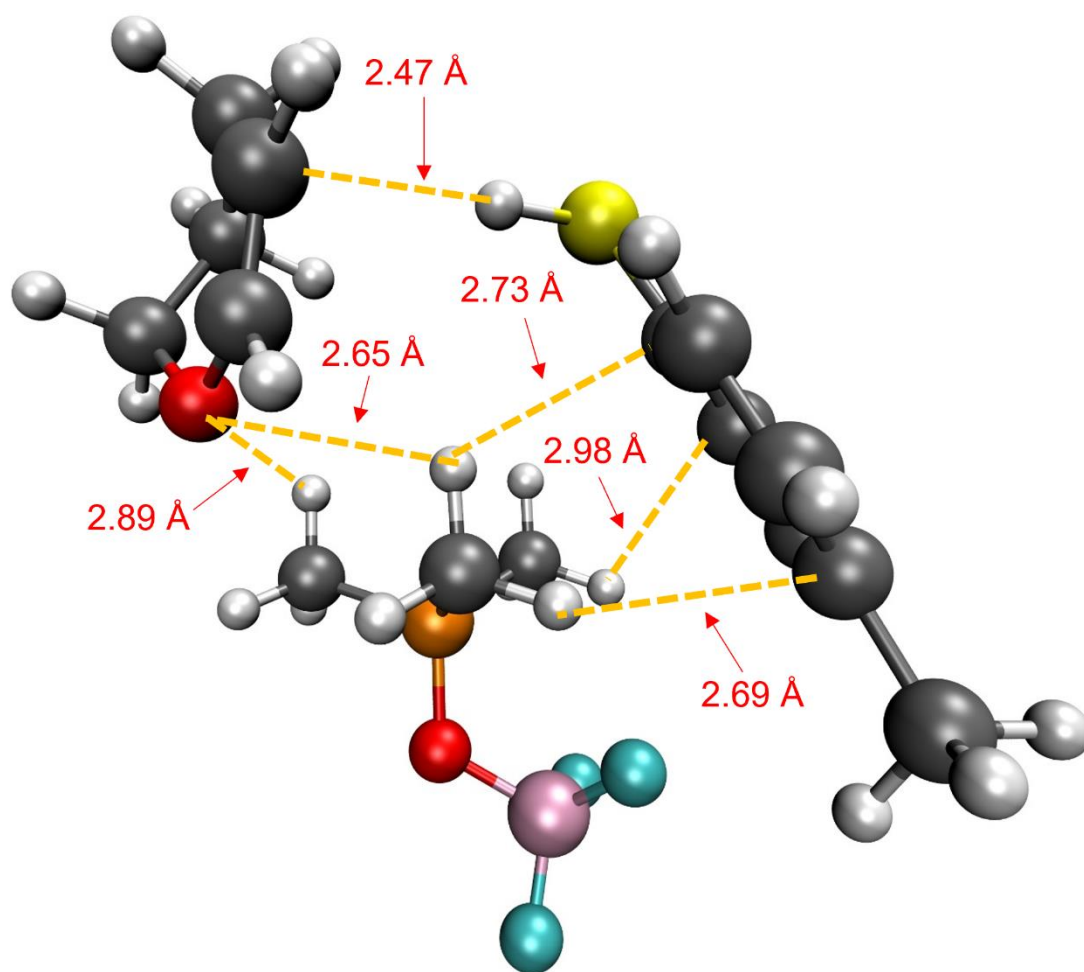

**Figure S13.** Snapshot of the optimized structure of complex **C**

*Note: Binding energy between **2** and the complex of **TOB-1** and 4-Me-C<sub>6</sub>H<sub>4</sub>-SH (M06-2X/aug-cc-pVTZ, Grimme D3 dispersion, SMD(toluene)) = -5.64 kcal/mol*



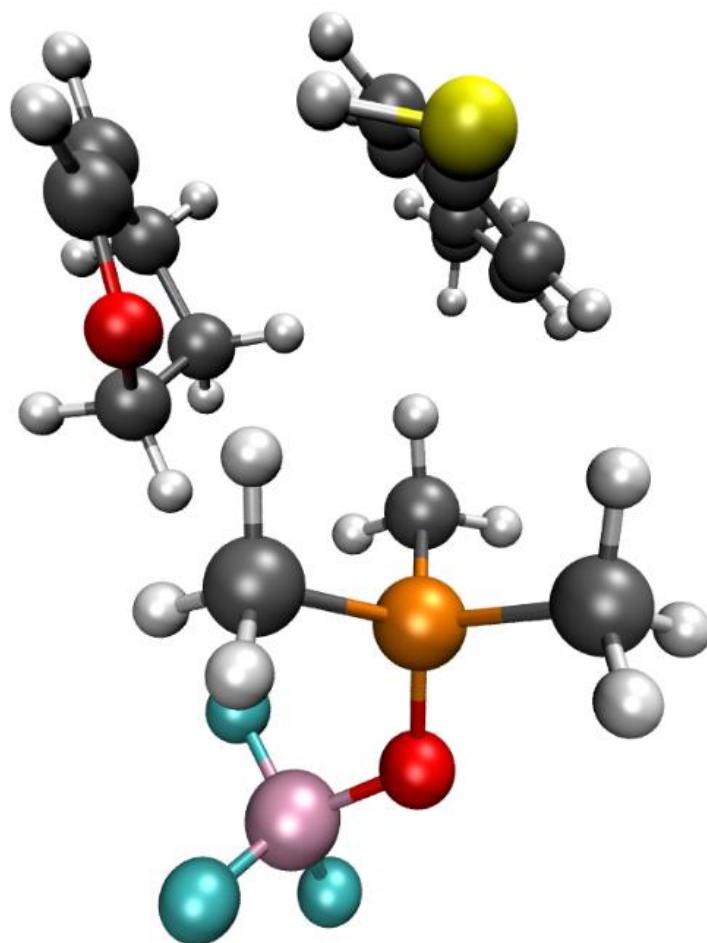

**Figure S14.** Snapshot of complex **C'** with sulfur positioned close to the C(sp<sup>3</sup>)-H  
*Note: Binding energy between **2** and the complex of **TOB-1** and 4-Me-C<sub>6</sub>H<sub>4</sub>-SH (M06-2X/aug-cc-pVTZ, Grimme D3 dispersion, SMD(toluene)) = -4.30 kcal/mol*

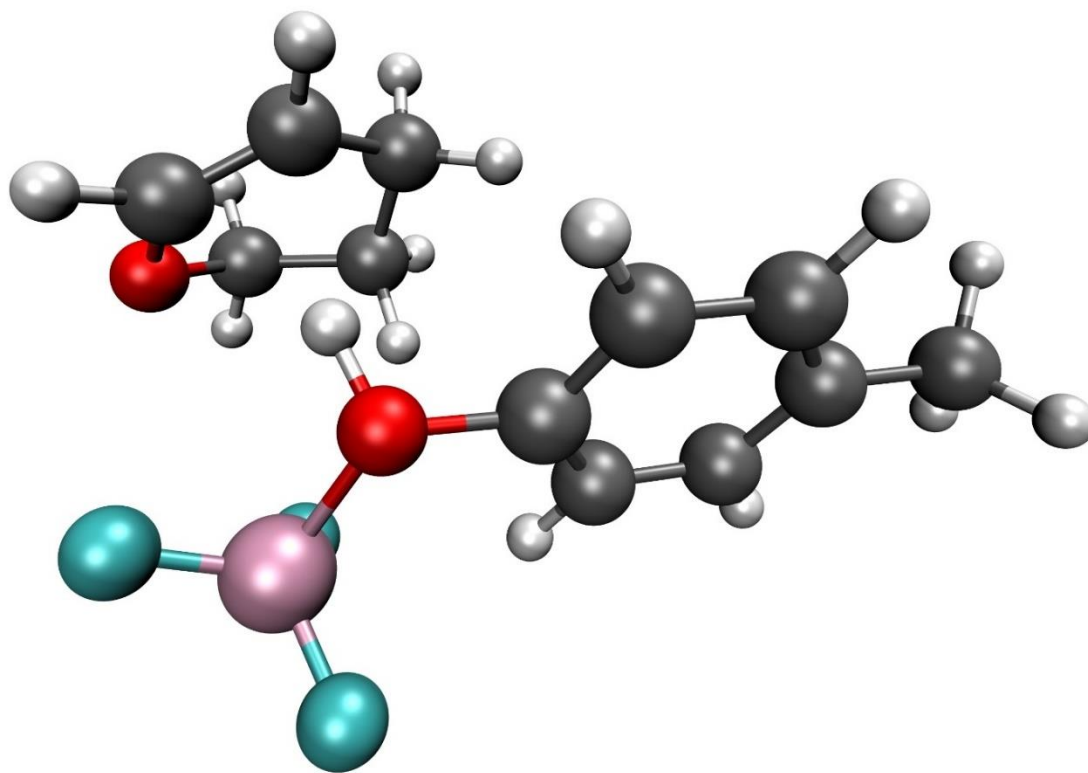

(D)

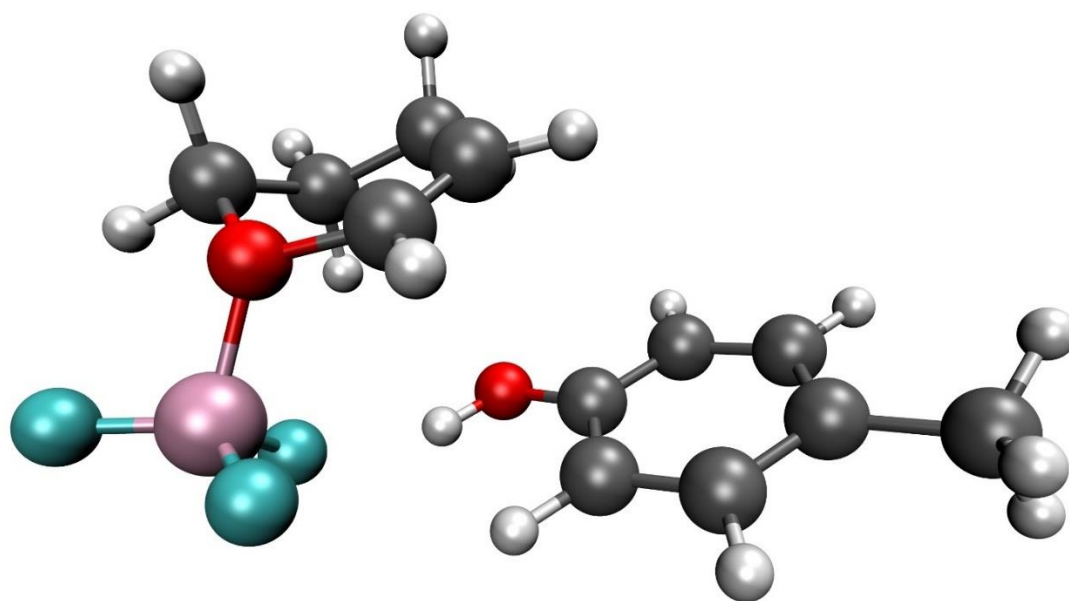

(D')

**Figure S15.** Snapshots of complexes **D** and **D'**

*Note: In the calculation, bilateral complexes **D** ( $\text{BF}_3$  complexed with 4-Me- $\text{C}_6\text{H}_4\text{-OH}$ ) and **D'** ( $\text{BF}_3$  complexed with **2**) were found but no trilateral complex was identified.*

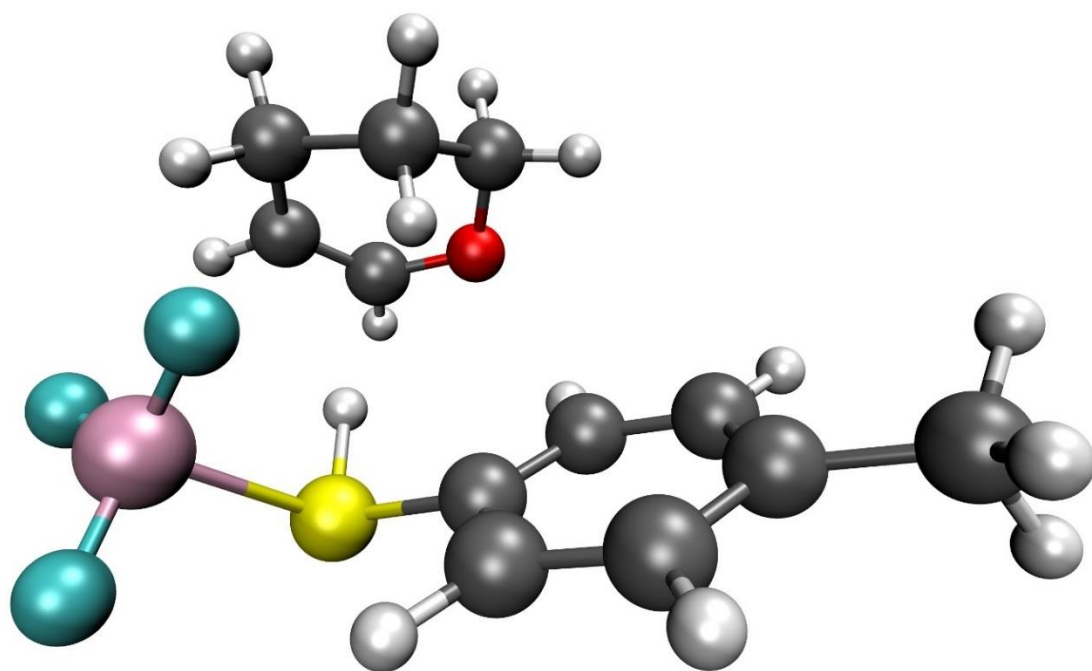

(E)

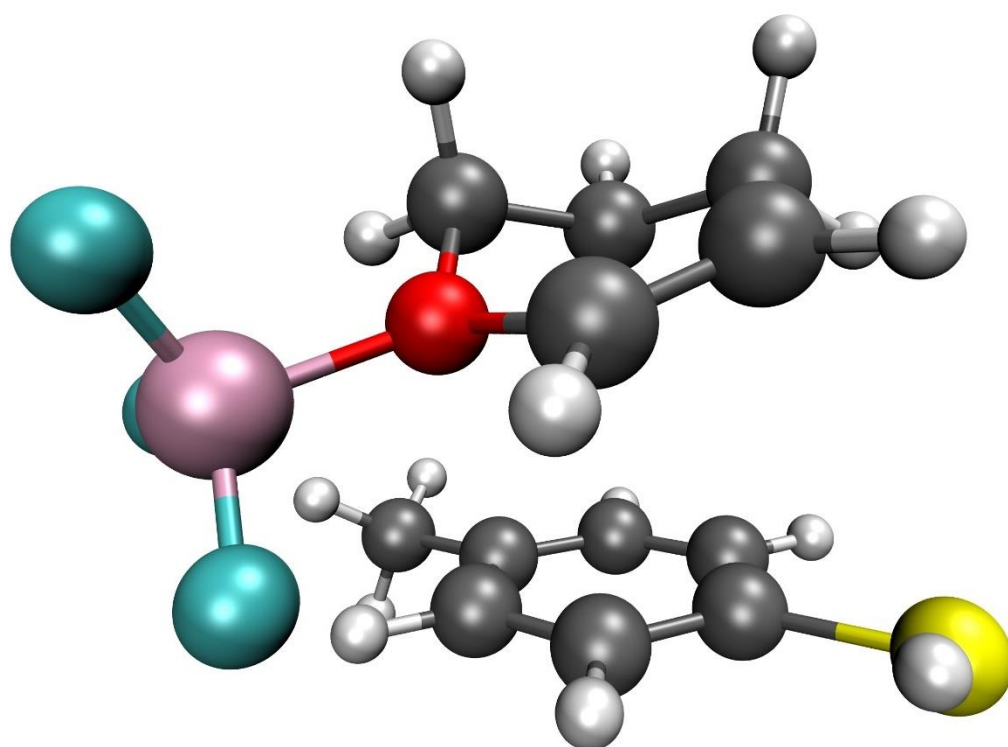

(E')

**Figure S16.** Snapshots of complexes E and E'.

*Note: In the calculation, bilateral complexes E (BF<sub>3</sub> complexed with 4-Me-C<sub>6</sub>H<sub>4</sub>-SH) and E' (BF<sub>3</sub> complexed with 2) were found but no trilateral complex was identified.*

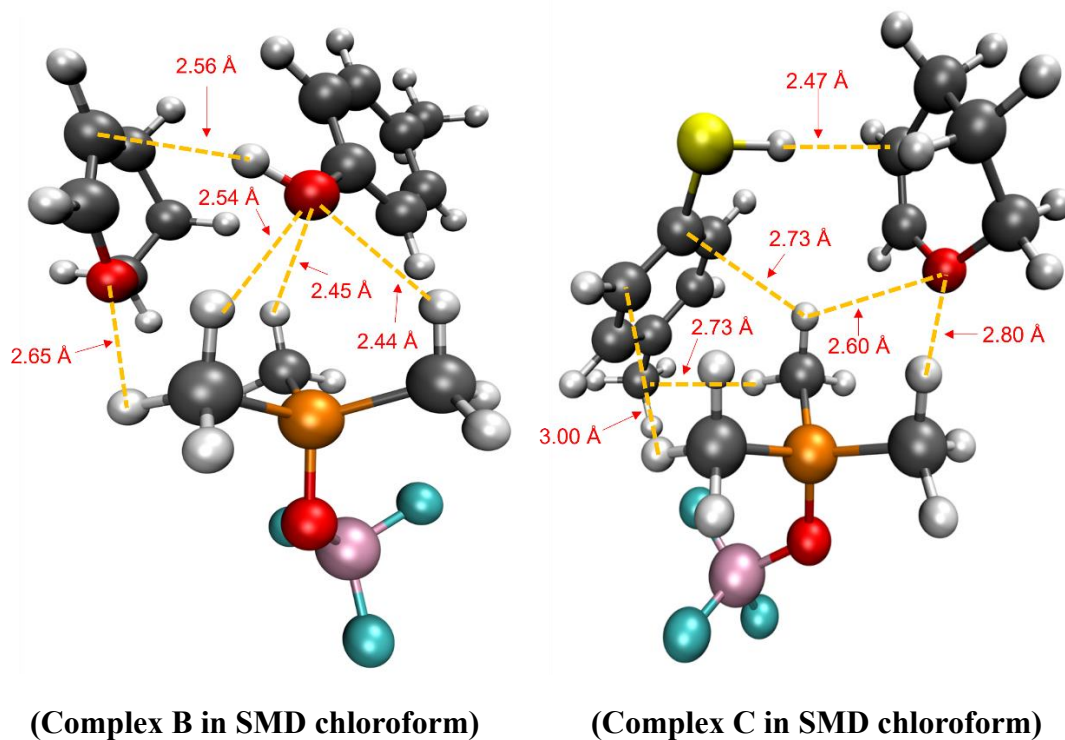

**Figure S17.** Snapshots of complexes **B** and **C** in SMD chloroform

*Note: Implicit SMD solvent model investigation was conducted to get a better understanding on the solvent effect. It was observed that the interactions in trilateral complex **B** was considerably interrupted when changing the solvent from toluene to chloroform. In particular, the OH-C(pyran) bond length significantly elongated from 2.40 to 2.56 Å. In contrast, the bond lengths in the trilateral complex **C** are consistent in toluene and chloroform.*

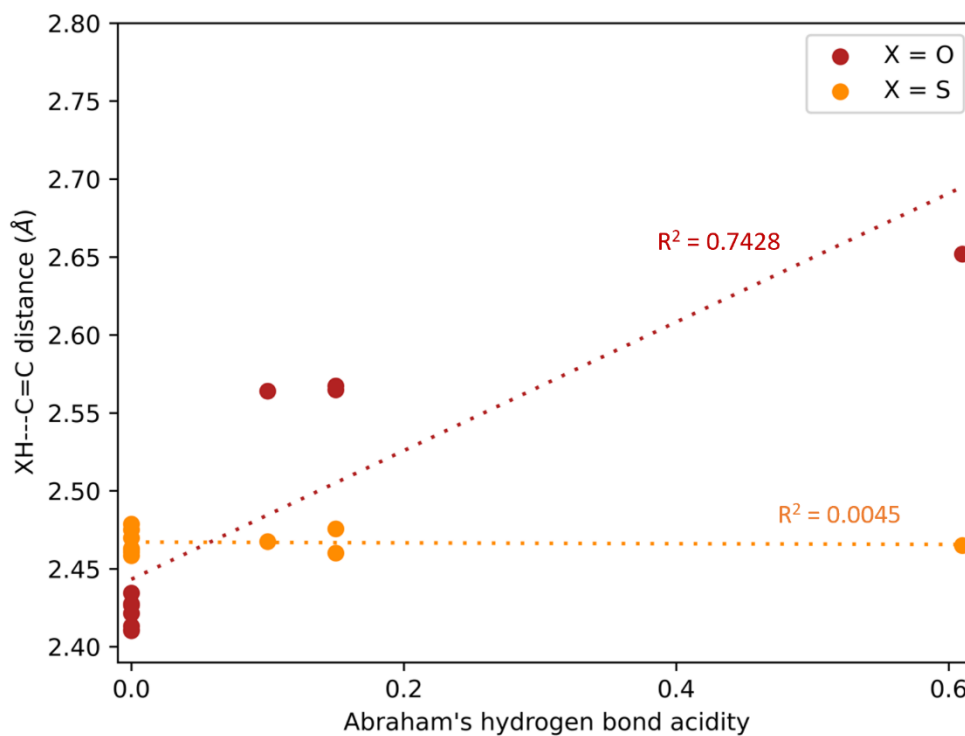

| SMD solvent        | Abraham's hydrogen bond acidity | OH...C=C (Å) | SH...C=C (Å) |
|--------------------|---------------------------------|--------------|--------------|
| hexane             | 0.00                            | 2.41         | 2.48         |
| toluene            | 0.00                            | 2.41         | 2.47         |
| chlorobenzene      | 0.00                            | 2.43         | 2.46         |
| dibutylether       | 0.00                            | 2.42         | 2.46         |
| tetrachloromethane | 0.00                            | 2.41         | 2.48         |
| dichlormethane     | 0.10                            | 2.56         | 2.47         |
| chloroform         | 0.15                            | 2.57         | 2.48         |
| bromoform          | 0.15                            | 2.56         | 2.46         |
| acetic acid        | 0.61                            | 2.65         | 2.46         |

**Figure S18.** Correlation between Abraham's hydrogen bond acidity<sup>10</sup> of some selected SMD solvents and the intermolecular distances between the 4-Me-C<sub>6</sub>H<sub>4</sub>-OH/4-Me-C<sub>6</sub>H<sub>4</sub>-SH and dihydropyran in their trilateral complexes with **TOB-1**

Cartesian coordinates

**Complex A**

E(M06-2X/aug-cc-pVTZ, Grimme D3 dispersion, SMD(chloroform)) = -  
1207.79728075

|   |             |             |             |
|---|-------------|-------------|-------------|
| C | 3.39670700  | -2.23936500 | -0.04561900 |
| H | 3.44743900  | -3.31432400 | -0.17469000 |
| C | 2.84969000  | -1.70157400 | 1.11866300  |
| H | 2.47797000  | -2.35806700 | 1.89723000  |
| C | 3.88229800  | -1.39445200 | -1.03738000 |
| H | 4.31231600  | -1.80890900 | -1.94182100 |
| C | 3.81331500  | -0.01267900 | -0.87048700 |
| H | 4.18313100  | 0.64779400  | -1.64822800 |
| C | 3.26272900  | 0.53259700  | 0.28697200  |
| C | 2.78532500  | -0.32331500 | 1.28266100  |
| H | 2.36147500  | 0.09782900  | 2.18909700  |
| C | 3.10253300  | 2.01919600  | 0.44314200  |
| H | 3.44933500  | 2.33257100  | 1.43340600  |
| H | 3.69160400  | 2.54250300  | -0.31606300 |
| O | 1.71258400  | 2.32223600  | 0.29464900  |
| H | 1.58479600  | 3.25131800  | 0.51846500  |
| P | -1.10850100 | 0.15685400  | -0.45226700 |
| C | -0.75975200 | 0.37963500  | 1.28975700  |
| H | -0.61097000 | -0.59422400 | 1.75894900  |
| H | 0.14042000  | 0.99169400  | 1.37511100  |
| H | -1.60584900 | 0.88505900  | 1.75772500  |
| C | 0.20006300  | -0.78445300 | -1.22183500 |
| H | 0.26823000  | -1.76132300 | -0.74114900 |
| H | -0.03348800 | -0.91179400 | -2.28061700 |
| H | 1.14347600  | -0.24662000 | -1.11147700 |
| C | -1.20577300 | 1.76417000  | -1.23837400 |
| H | -1.48686000 | 1.62835600  | -2.28435400 |
| H | -1.96233400 | 2.36573600  | -0.73391800 |
| H | -0.22794300 | 2.24501800  | -1.17121400 |
| O | -2.42908900 | -0.65462100 | -0.67227200 |
| B | -3.66866000 | -0.41708700 | 0.14627200  |
| F | -3.78850900 | 0.96985900  | 0.35103900  |
| F | -4.74202000 | -0.91853400 | -0.55966100 |
| F | -3.51310500 | -1.05571300 | 1.37553000  |

## Complex B

E(M06-2X/aug-cc-pVTZ, Grimme D3 dispersion, SMD(toluene)) = -1478.34109403

|   |             |             |             |
|---|-------------|-------------|-------------|
| C | -4.04898080 | -2.44064538 | 0.27616579  |
| C | -2.68236883 | -2.71134249 | 0.38759531  |
| H | -2.35871816 | -3.61297490 | 0.89770295  |
| C | -4.42938244 | -1.27396617 | -0.38319905 |
| H | -5.48349079 | -1.04002328 | -0.48918146 |
| C | -3.48506440 | -0.40227138 | -0.91858805 |
| H | -3.79628141 | 0.49602654  | -1.44312566 |
| C | -2.13114352 | -0.68814577 | -0.78603593 |
| C | -1.72690419 | -1.84925389 | -0.13078435 |
| H | -0.66920182 | -2.06273834 | -0.02653048 |
| C | -5.06758307 | -3.39375640 | 0.84505396  |
| H | -6.07820051 | -2.99489355 | 0.74772147  |
| H | -5.03457663 | -4.35627397 | 0.32775431  |
| H | -4.87911778 | -3.58450766 | 1.90435328  |
| O | -1.16345340 | 0.14363826  | -1.28273085 |
| H | -1.54063311 | 1.02760783  | -1.40918514 |
| P | 2.22828799  | -0.02266272 | -0.74470573 |
| C | 1.33536590  | 0.03699121  | 0.80922316  |
| H | 1.75745313  | 0.84389304  | 1.40969570  |
| H | 0.28109599  | 0.22265464  | 0.60615405  |
| H | 1.47862600  | -0.90695298 | 1.33678546  |
| C | 1.89690882  | 1.44814552  | -1.71068539 |
| H | 2.05708373  | 2.33191971  | -1.09288115 |
| H | 2.58072820  | 1.45868132  | -2.56160190 |
| H | 0.86673951  | 1.42049073  | -2.06569402 |
| C | 1.71426849  | -1.45012444 | -1.70351962 |
| H | 2.33859121  | -1.50219154 | -2.59806650 |
| H | 1.86791917  | -2.35401259 | -1.11371127 |
| H | 0.66746641  | -1.34497532 | -1.99156422 |
| O | 3.76822759  | -0.05104644 | -0.49870237 |
| B | 4.37225649  | -0.90405369 | 0.60232699  |
| F | 3.63619585  | -2.10490032 | 0.63640927  |
| F | 5.69119115  | -1.11798187 | 0.29139337  |
| F | 4.20991660  | -0.22586006 | 1.80565181  |
| C | -0.99247708 | 3.16010268  | -0.69024905 |
| H | -0.48964188 | 3.44349432  | -1.60937898 |

|   |             |            |             |
|---|-------------|------------|-------------|
| C | -2.32309788 | 3.14413920 | -0.56368703 |
| H | -2.91638367 | 3.46730834 | -1.41128347 |
| C | -2.99824964 | 2.72950609 | 0.71765496  |
| H | -3.84114718 | 2.06680136 | 0.50618675  |
| H | -3.41358107 | 3.61068610 | 1.21858737  |
| C | -1.98761870 | 2.02859648 | 1.62763625  |
| H | -2.35264460 | 1.97387855 | 2.65481895  |
| H | -1.82174382 | 1.00213067 | 1.28563911  |
| C | -0.67036266 | 2.78655259 | 1.60349696  |
| H | 0.08674231  | 2.31677772 | 2.22958338  |
| H | -0.81778362 | 3.81850756 | 1.94172919  |
| O | -0.10858599 | 2.83370918 | 0.28429394  |

### Complex C

E(M06-2X/aug-cc-pVTZ, Grimme D3 dispersion, SMD(toluene)) = -1801.30294136

|   |             |             |             |
|---|-------------|-------------|-------------|
| C | -1.64849295 | 2.99880782  | -0.65918862 |
| C | -1.68829436 | 2.63671442  | 0.68971572  |
| H | -2.64908257 | 2.54774245  | 1.18630468  |
| C | -0.39960635 | 3.09910150  | -1.27276629 |
| H | -0.34105828 | 3.38837655  | -2.31692596 |
| C | 0.77447433  | 2.83234577  | -0.57489474 |
| H | 1.73390863  | 2.92343888  | -1.07200738 |
| C | 0.71299864  | 2.43457329  | 0.75805761  |
| C | -0.52560019 | 2.35230103  | 1.39357407  |
| H | -0.58134860 | 2.04876683  | 2.43318544  |
| C | -2.92627302 | 3.23285063  | -1.41780877 |
| H | -2.72737252 | 3.53332212  | -2.44723202 |
| H | -3.52509276 | 2.31866448  | -1.43333876 |
| H | -3.52643684 | 4.01298728  | -0.94327154 |
| S | 2.18175754  | 2.01236596  | 1.68299873  |
| H | 2.83343839  | 1.44682472  | 0.64917196  |
| P | -0.93167475 | -1.69229246 | 0.30436035  |
| C | -1.18650434 | -1.04310763 | 1.95815273  |
| H | -1.56911612 | -1.83812787 | 2.60016477  |
| H | -0.23826314 | -0.66855654 | 2.35105292  |
| H | -1.91847652 | -0.23631545 | 1.91297850  |
| C | 0.20687868  | -3.07140245 | 0.40911047  |
| H | -0.25870002 | -3.87537597 | 0.98132347  |



|   |             |             |             |
|---|-------------|-------------|-------------|
| H | 0.44550118  | -3.42226275 | -0.59585833 |
| H | 1.11929669  | -2.74163913 | 0.90903179  |
| C | -0.21066843 | -0.42067213 | -0.72299208 |
| H | -0.03341825 | -0.83600260 | -1.71651859 |
| H | -0.91119095 | 0.41267436  | -0.78561307 |
| H | 0.73363472  | -0.09545418 | -0.28459341 |
| O | -2.25885725 | -2.23018998 | -0.30807589 |
| B | -3.56437558 | -1.46470107 | -0.16177374 |
| F | -3.25522775 | -0.09462837 | -0.29664096 |
| F | -4.41582914 | -1.89688433 | -1.14507247 |
| F | -4.05212360 | -1.70339435 | 1.11745097  |
| C | 3.01036762  | -0.39039002 | -1.64420464 |
| H | 2.35795678  | 0.03474950  | -2.39894137 |
| C | 4.05930674  | 0.26011958  | -1.13649802 |
| H | 4.28618602  | 1.24400012  | -1.53044930 |
| C | 4.90571301  | -0.32052506 | -0.03387048 |
| H | 5.08389319  | 0.43200750  | 0.74058388  |
| H | 5.89189944  | -0.60133279 | -0.41847420 |
| C | 4.19868434  | -1.54164616 | 0.55835529  |
| H | 4.88124605  | -2.14769917 | 1.15679400  |
| H | 3.37876922  | -1.21950844 | 1.20993370  |
| C | 3.62223830  | -2.37818620 | -0.57274453 |
| H | 3.12819843  | -3.28136008 | -0.21578642 |
| H | 4.41517682  | -2.66574719 | -1.27314779 |
| O | 2.62843499  | -1.64921982 | -1.29898751 |

### Complex C'

E(M06-2X/aug-cc-pVTZ, Grimme D3 dispersion, SMD(toluene)) = -1801.29901922

|   |            |             |             |
|---|------------|-------------|-------------|
| C | 3.95670455 | -1.43757971 | -1.41485646 |
| C | 2.56330351 | -1.51431793 | -1.46440481 |
| H | 2.06980547 | -1.68057778 | -2.41653748 |
| C | 4.56253577 | -1.22527045 | -0.17525924 |
| H | 5.64395034 | -1.16540808 | -0.11312139 |
| C | 3.80413648 | -1.09161355 | 0.98244465  |
| H | 4.28890848 | -0.93443107 | 1.93871335  |
| C | 2.41436848 | -1.15820953 | 0.91620503  |
| C | 1.79651814 | -1.38263612 | -0.31277883 |
| H | 0.71643318 | -1.45420552 | -0.37266953 |

|   |             |             |             |
|---|-------------|-------------|-------------|
| C | 4.77745104  | -1.60447210 | -2.66529488 |
| H | 5.79423989  | -1.23658779 | -2.52319677 |
| H | 4.83812001  | -2.65965401 | -2.94630079 |
| H | 4.32962642  | -1.06655918 | -3.50316796 |
| P | -2.61923107 | -0.70563886 | 0.86922269  |
| C | -1.45585550 | 0.54179785  | 0.31953071  |
| H | -1.83945337 | 1.53215237  | 0.56626608  |
| H | -0.49569236 | 0.38962955  | 0.81663381  |
| H | -1.34235558 | 0.46350355  | -0.76287995 |
| C | -2.85239460 | -0.54587443 | 2.63732090  |
| H | -3.22119734 | 0.45670283  | 2.85929855  |
| H | -3.58485148 | -1.28263192 | 2.97097923  |
| H | -1.90423837 | -0.71366698 | 3.15177902  |
| C | -1.95492297 | -2.33748574 | 0.52813334  |
| H | -2.68898454 | -3.08480622 | 0.83654900  |
| H | -1.78292211 | -2.43310728 | -0.54435133 |
| H | -1.02637003 | -2.48643201 | 1.08291893  |
| O | -4.01524166 | -0.52185770 | 0.20502077  |
| B | -4.13476017 | -0.17215469 | -1.27192655 |
| F | -3.12669560 | -0.89673108 | -1.93945700 |
| F | -5.38993215 | -0.53269163 | -1.68614598 |
| F | -3.89141496 | 1.18919046  | -1.40646469 |
| C | 1.20756033  | 2.78874023  | 1.35537092  |
| H | 0.96117684  | 2.90851258  | 2.40556133  |
| C | 2.39490706  | 2.35189279  | 0.93063848  |
| H | 3.15187178  | 2.12922154  | 1.67421127  |
| C | 2.69372732  | 2.14934620  | -0.53019808 |
| H | 3.22393452  | 1.20428647  | -0.67431747 |
| H | 3.35719007  | 2.94121203  | -0.89557597 |
| C | 1.38294321  | 2.14616160  | -1.31701501 |
| H | 1.55808771  | 2.26585002  | -2.38822922 |
| H | 0.87323545  | 1.19006645  | -1.17089314 |
| C | 0.48243498  | 3.27066525  | -0.82897128 |
| H | -0.47665501 | 3.28206161  | -1.34664699 |
| H | 0.97545749  | 4.23919378  | -0.97510873 |
| O | 0.16624195  | 3.14275319  | 0.56151254  |
| S | 1.43706346  | -1.01275860 | 2.41496044  |
| H | 1.37380930  | 0.33322912  | 2.40316142  |

### Complex D

E(M06-2X/aug-cc-pVTZ, Grimme D3 dispersion, SMD(toluene)) = -941.949174058

|   |             |             |             |
|---|-------------|-------------|-------------|
| C | 3.62474421  | -0.36020727 | 0.12917177  |
| C | 3.07150927  | -0.55711869 | -1.13886150 |
| H | 3.66211643  | -1.03639894 | -1.91223590 |
| C | 2.84681202  | 0.26842050  | 1.10018001  |
| H | 3.25857624  | 0.43399265  | 2.08938170  |
| C | 1.54510136  | 0.68341219  | 0.83527963  |
| H | 0.94063416  | 1.15901939  | 1.59660064  |
| C | 1.03593858  | 0.46906968  | -0.43246359 |
| C | 1.78225870  | -0.13522036 | -1.43192107 |
| H | 1.35654046  | -0.26500142 | -2.42017307 |
| C | 5.03614811  | -0.79593871 | 0.42045108  |
| H | 5.25094985  | -0.74946374 | 1.48856285  |
| H | 5.20951125  | -1.81904184 | 0.08006181  |
| H | 5.75278272  | -0.15105290 | -0.09528066 |
| O | -0.27717259 | 0.86044353  | -0.74664388 |
| H | -0.84138307 | 0.08758136  | -1.02178053 |
| C | -2.66013274 | -0.99755268 | -1.05260787 |
| H | -3.15514842 | -0.48124151 | -1.86855478 |
| C | -1.57244229 | -1.76663595 | -1.23178047 |
| H | -1.23064981 | -1.92957146 | -2.24771347 |
| C | -0.87780229 | -2.43831294 | -0.07290924 |
| H | 0.20764389  | -2.36382810 | -0.18502083 |
| H | -1.11810711 | -3.50671326 | -0.06269495 |
| C | -1.32459185 | -1.77706150 | 1.23285873  |
| H | -1.05380990 | -2.38662106 | 2.09683119  |
| H | -0.84336338 | -0.80356608 | 1.35254567  |
| C | -2.82983448 | -1.57141619 | 1.21947114  |
| H | -3.17789528 | -1.05861093 | 2.11404660  |
| H | -3.34782819 | -2.53333075 | 1.13185647  |
| O | -3.25380302 | -0.74803586 | 0.12353388  |
| B | -1.12252672 | 2.00879596  | 0.03717962  |
| F | -2.23347956 | 2.10588801  | -0.74743078 |
| F | -1.37023057 | 1.51063533  | 1.29227991  |
| F | -0.29366574 | 3.08702986  | 0.03307725  |

**Complex D'**

E(M06-2X/aug-cc-pVTZ, Grimme D3 dispersion, SMD(toluene)) = -941.955591108

|   |             |             |             |
|---|-------------|-------------|-------------|
| C | -3.69058176 | -0.43482359 | -0.32111001 |
| C | -3.58265415 | 0.84702026  | 0.22157844  |
| H | -4.38255396 | 1.56252797  | 0.05859876  |
| C | -2.64492871 | -1.32841552 | -0.08567702 |
| H | -2.69928763 | -2.33265616 | -0.49393559 |
| C | -1.52939453 | -0.96401397 | 0.65888307  |
| H | -0.71770407 | -1.66804126 | 0.81354316  |
| C | -1.43835972 | 0.32443748  | 1.18246870  |
| C | -2.47452884 | 1.22960377  | 0.96716030  |
| H | -2.39532573 | 2.22651223  | 1.38531653  |
| C | -4.91243926 | -0.84942577 | -1.09994140 |
| H | -4.67812366 | -1.64703890 | -1.80733104 |
| H | -5.69611044 | -1.22001508 | -0.43239839 |
| H | -5.32814849 | -0.00966966 | -1.66046909 |
| O | -0.35817295 | 0.74955473  | 1.88820530  |
| H | 0.32255022  | 0.06370455  | 1.87531931  |
| C | 0.90762774  | 0.12649352  | -1.40929849 |
| H | 0.49294775  | -0.75488542 | -1.87322698 |
| C | 0.34818038  | 1.31930975  | -1.32249186 |
| H | -0.62786530 | 1.42841483  | -1.78206471 |
| C | 0.95740307  | 2.48848140  | -0.60729405 |
| H | 0.21116091  | 2.91136121  | 0.06988756  |
| H | 1.20150284  | 3.26757308  | -1.33714111 |
| C | 2.19875013  | 2.06673774  | 0.17892705  |
| H | 2.83974580  | 2.92377893  | 0.39342337  |
| H | 1.90592616  | 1.62329711  | 1.13093546  |
| C | 3.00345120  | 1.05601451  | -0.60981216 |
| H | 3.87672105  | 0.68552135  | -0.07934677 |
| H | 3.29584150  | 1.43195062  | -1.59153923 |
| O | 2.19190819  | -0.13319349 | -0.88086158 |
| B | 2.32308331  | -1.36871150 | 0.13751660  |
| F | 1.53950207  | -2.34099308 | -0.40661821 |
| F | 3.65476269  | -1.63743625 | 0.17798787  |
| F | 1.83220983  | -0.89581348 | 1.34682375  |

### Complex E

E(M06-2X/aug-cc-pVTZ, Grimme D3 dispersion, SMD(toluene)) = -1264.89587822

|   |             |             |             |
|---|-------------|-------------|-------------|
| C | -3.56633095 | -0.47433782 | 0.17425216  |
| C | -3.21128550 | 0.86172740  | 0.35379508  |
| H | -3.88860303 | 1.53028770  | 0.87375792  |
| C | -2.66721984 | -1.31507811 | -0.48649392 |
| H | -2.92021504 | -2.36045329 | -0.63054237 |
| C | -1.45424115 | -0.84032722 | -0.96686036 |
| H | -0.76217098 | -1.51039022 | -1.46500055 |
| C | -1.12407131 | 0.49736114  | -0.76774871 |
| C | -1.99564332 | 1.35417659  | -0.10735029 |
| H | -1.72754754 | 2.39103477  | 0.05967659  |
| C | -4.89073101 | -0.99933166 | 0.65945052  |
| H | -4.78714474 | -2.00280168 | 1.07652643  |
| H | -5.31601059 | -0.35022425 | 1.42584290  |
| H | -5.60632002 | -1.05696079 | -0.16576935 |
| S | 0.41796124  | 1.16215251  | -1.39124798 |
| H | 1.19629901  | 0.08340753  | -1.14894771 |
| C | 2.45167018  | -1.92123203 | -1.05112078 |
| H | 2.74225523  | -1.98264760 | -2.09426410 |
| C | 3.10978227  | -1.18919310 | -0.15018725 |
| H | 3.99227264  | -0.65326337 | -0.47839097 |
| C | 2.65111766  | -1.07007884 | 1.27836660  |
| H | 2.68920454  | -0.02454428 | 1.59236059  |
| H | 3.33298655  | -1.62005445 | 1.93615037  |
| C | 1.22548480  | -1.61016216 | 1.41049346  |
| H | 0.97833381  | -1.82248187 | 2.45261779  |
| H | 0.50589818  | -0.86603444 | 1.05831863  |
| C | 1.07518302  | -2.88162831 | 0.59083855  |
| H | 0.06215615  | -3.28079300 | 0.63797445  |
| H | 1.77564008  | -3.64784797 | 0.94390603  |
| O | 1.33572183  | -2.65718043 | -0.80044233 |
| B | 1.19119974  | 2.30505676  | 0.35681174  |
| F | 2.51633296  | 2.21904264  | 0.10545176  |
| F | 0.73693389  | 1.58616696  | 1.40671299  |
| F | 0.61134686  | 3.51035833  | 0.17457087  |

**Complex E'**

E(M06-2X/aug-cc-pVTZ, Grimme D3 dispersion, SMD(toluene)) = -1264.91626130

|   |             |             |             |
|---|-------------|-------------|-------------|
| C | 1.30753368  | 2.31388544  | 0.14828778  |
| C | 2.47310331  | 1.76522846  | 0.68562424  |
| H | 3.03162798  | 2.32186559  | 1.43125698  |
| C | 0.61407359  | 1.56917323  | -0.80745108 |
| H | -0.29805363 | 1.96610171  | -1.23968628 |
| C | 1.06401791  | 0.32053444  | -1.21604771 |
| H | 0.50169085  | -0.22786185 | -1.96349655 |
| C | 2.21721502  | -0.22418634 | -0.65316924 |
| C | 2.92547834  | 0.50803528  | 0.29891112  |
| H | 3.82169661  | 0.09369969  | 0.74754323  |
| C | 0.81218737  | 3.67333194  | 0.56532558  |
| H | -0.27936268 | 3.70095005  | 0.58043738  |
| H | 1.18040477  | 3.94334836  | 1.55652561  |
| H | 1.15068638  | 4.44130099  | -0.13622888 |
| S | 2.83600955  | -1.82658699 | -1.12655154 |
| H | 1.68046058  | -2.27617003 | -1.64086834 |
| C | -1.17835123 | -1.78506593 | -0.15655149 |
| H | -1.59183857 | -2.04755164 | -1.11921498 |
| C | -0.39657796 | -2.53695548 | 0.60020982  |
| H | -0.16111333 | -3.52768659 | 0.22987842  |
| C | 0.17041803  | -2.08882303 | 1.91645347  |
| H | 1.24811674  | -2.27369371 | 1.92371258  |
| H | -0.25791771 | -2.70223376 | 2.71610927  |
| C | -0.10961019 | -0.60418438 | 2.15789638  |
| H | -0.03597313 | -0.35717489 | 3.21856296  |
| H | 0.61426183  | 0.01123413  | 1.62055050  |
| C | -1.49451135 | -0.23501386 | 1.67426380  |
| H | -1.70845622 | 0.82506129  | 1.77648384  |
| H | -2.28179923 | -0.83117940 | 2.14289891  |
| O | -1.56585193 | -0.49932949 | 0.24088253  |
| B | -2.62968340 | 0.30182718  | -0.68127437 |
| F | -2.13000834 | 0.13654598  | -1.94437919 |
| F | -2.57170584 | 1.58302778  | -0.21083249 |
| F | -3.82553144 | -0.32011563 | -0.46954881 |

**Complex B (in SMD chloroform)**

E(M06-2X/aug-cc-pVTZ, Grimme D3 dispersion, SMD(chloroform)) = -  
1478.35127719

|   |             |             |             |
|---|-------------|-------------|-------------|
| C | -3.88022703 | -2.44556144 | 0.30159579  |
| C | -2.50982491 | -2.72332360 | 0.30080941  |
| H | -2.14801320 | -3.61634612 | 0.80077244  |
| C | -4.31081791 | -1.29465713 | -0.35557744 |
| H | -5.36956814 | -1.05793262 | -0.37976022 |
| C | -3.41140414 | -0.44057440 | -0.98886132 |
| H | -3.76116262 | 0.44875274  | -1.50399202 |
| C | -2.05120080 | -0.72706083 | -0.95798634 |
| C | -1.59801304 | -1.87890488 | -0.31682557 |
| H | -0.53652038 | -2.09876846 | -0.30173683 |
| C | -4.84932828 | -3.37058595 | 0.99114960  |
| H | -5.87495413 | -3.01380854 | 0.88686607  |
| H | -4.79640084 | -4.37839414 | 0.57131409  |
| H | -4.62461259 | -3.44861855 | 2.05812268  |
| O | -1.12455999 | 0.09450072  | -1.54044510 |
| H | -1.53198669 | 0.95994470  | -1.69505960 |
| P | 2.23217246  | 0.07488150  | -0.74390444 |
| C | 1.25216223  | 0.01517795  | 0.75479124  |
| H | 1.61313430  | 0.79839280  | 1.42305089  |
| H | 0.20683000  | 0.19198647  | 0.50171093  |
| H | 1.38156606  | -0.95611325 | 1.23420588  |
| C | 1.90615196  | 1.58485686  | -1.64419642 |
| H | 2.00172525  | 2.43672227  | -0.97053269 |
| H | 2.63230588  | 1.66281987  | -2.45567781 |
| H | 0.89771197  | 1.54407796  | -2.05550789 |
| C | 1.85347939  | -1.31970669 | -1.80506182 |
| H | 2.54317703  | -1.29807102 | -2.65163320 |
| H | 1.99683060  | -2.24728143 | -1.25056205 |
| H | 0.82656733  | -1.23795302 | -2.16337168 |
| O | 3.76010852  | 0.09395558  | -0.39814398 |
| B | 4.35996604  | -0.79607275 | 0.65492090  |
| F | 3.71771613  | -2.04616535 | 0.57693464  |
| F | 5.71030593  | -0.90512370 | 0.39530939  |
| F | 4.11934305  | -0.22874529 | 1.90527876  |
| C | -1.17029816 | 3.06137969  | -0.62299170 |

|   |             |            |             |
|---|-------------|------------|-------------|
| H | -0.66892702 | 3.37474248 | -1.53340784 |
| C | -2.49956923 | 3.01401431 | -0.50042645 |
| H | -3.09810043 | 3.33674193 | -1.34472850 |
| C | -3.16831536 | 2.54749556 | 0.76605049  |
| H | -3.99634517 | 1.87439801 | 0.53010222  |
| H | -3.60232648 | 3.40272637 | 1.29572098  |
| C | -2.14314528 | 1.84017603 | 1.65387176  |
| H | -2.50918811 | 1.73562118 | 2.67699136  |
| H | -1.94294904 | 0.83453239 | 1.26889507  |
| C | -0.84883331 | 2.63650251 | 1.66338002  |
| H | -0.08308728 | 2.17055600 | 2.28179352  |
| H | -1.02999876 | 3.65335001 | 2.03026173  |
| O | -0.28046195 | 2.73779424 | 0.35035059  |

**Complex C (in SMD chloroform)**

E(M06-2X/aug-cc-pVTZ, Grimme D3 dispersion, SMD(chloroform)) = -  
1801.31262297

|   |             |             |             |
|---|-------------|-------------|-------------|
| C | -1.46626012 | 3.12721199  | -0.63537426 |
| C | -1.55121837 | 2.73975233  | 0.70453702  |
| H | -2.52118495 | 2.71869159  | 1.19138067  |
| C | -0.20591828 | 3.14062609  | -1.23406967 |
| H | -0.11193225 | 3.44531919  | -2.27133480 |
| C | 0.93571124  | 2.77246793  | -0.52832588 |
| H | 1.90519193  | 2.79946456  | -1.01368166 |
| C | 0.82749321  | 2.35794869  | 0.79708296  |
| C | -0.42243989 | 2.35302331  | 1.41598323  |
| H | -0.51577651 | 2.03342043  | 2.44818082  |
| C | -2.70927472 | 3.48973463  | -1.40237660 |
| H | -2.46990734 | 3.79103100  | -2.42291667 |
| H | -3.39061410 | 2.63612356  | -1.44618897 |
| H | -3.24258651 | 4.31120115  | -0.91759036 |
| S | 2.25069020  | 1.82546516  | 1.73542625  |
| H | 2.90661814  | 1.28300543  | 0.69150334  |
| P | -1.03044199 | -1.67406473 | 0.28262904  |
| C | -1.26165973 | -1.02503492 | 1.93816111  |
| H | -1.66628383 | -1.81189230 | 2.57695881  |
| H | -0.29697965 | -0.69074996 | 2.32701792  |
| H | -1.95956372 | -0.18798782 | 1.90401865  |



|   |             |             |             |
|---|-------------|-------------|-------------|
| C | 0.06753265  | -3.08260745 | 0.36813060  |
| H | -0.40864680 | -3.86990444 | 0.95467728  |
| H | 0.27638154  | -3.44180357 | -0.64055356 |
| H | 0.99806579  | -2.77217081 | 0.84647919  |
| C | -0.29537227 | -0.41561422 | -0.75009872 |
| H | -0.14108189 | -0.82897285 | -1.74852204 |
| H | -0.96841406 | 0.44120913  | -0.79701780 |
| H | 0.66311000  | -0.12507169 | -0.31894790 |
| O | -2.38336043 | -2.17639728 | -0.32059513 |
| B | -3.66561038 | -1.39764038 | -0.17950252 |
| F | -3.35696783 | -0.02941133 | -0.31600991 |
| F | -4.52652794 | -1.82196773 | -1.16797750 |
| F | -4.17987407 | -1.62889755 | 1.09412784  |
| C | 2.96469532  | -0.43955079 | -1.60992521 |
| H | 2.28288938  | 0.00269838  | -2.32824191 |
| C | 4.07252799  | 0.17042839  | -1.18274696 |
| H | 4.31297636  | 1.13958131  | -1.60461190 |
| C | 4.96491897  | -0.43185908 | -0.12894061 |
| H | 5.22046259  | 0.32298270  | 0.62140635  |
| H | 5.91266203  | -0.75480871 | -0.57270237 |
| C | 4.25285364  | -1.61832123 | 0.52498419  |
| H | 4.95223459  | -2.24774203 | 1.07820395  |
| H | 3.49563026  | -1.25992343 | 1.23049840  |
| C | 3.56248074  | -2.44094793 | -0.55054108 |
| H | 3.05453184  | -3.31517706 | -0.14478004 |
| H | 4.29022666  | -2.77130173 | -1.30087435 |
| O | 2.55205235  | -1.67567131 | -1.21706095 |

## 10. References

- (1) M. Nie, L. Madec, J. Xia, D. S. Hall, J. R. Dahn, *J. Power Sources* 2016, **328**, 433.
- (2) Y. Zhao, D. G. Truhlar, *Theor. Chem. Acc.* 2008, **120**, 215–241.
- (3) S. Grimme, J. Antony, S. Ehrlich, H. Krieg, *J. Chem. Phys.* 2010, **132**, 154104.
- (4) A. V. Marenich, C. J. Cramer, D. G. Truhlar, *J. Phys. Chem. B.* 2009, **113**, 6378–6396.
- (5) M. J. Frisch, G. W. Trucks, H. B. Schlegel, G. E. Scuseria, M. A. Robb, J. R. Cheeseman, G. Scalmani, V. Barone, G. A. Petersson, H. Nakatsuji, X. Li, M. Caricato, A. V. Marenich, J. Bloino, B. G. Janesko, R. Gomperts, B. Mennucci, H. P. Hratchian, J. V. Ortiz, A. F. Izmaylov, J. L. W. Sonnenberg, F. Ding, F. Lipparini, F. Egidi, J. Goings, B. Peng, A. Petrone, T. Henderson, D. Ranasinghe, V. G. Zakrzewski, J. Gao, N. Rega, G. Zheng, W. Liang, M. Hada, M. Ehara, K. Toyota, R. Fukuda, J. Hasegawa, M. Ishida, T. Nakajima, Y. Honda, O. Kitao, H. Nakai, T. Vreven, K. Throssell, J. A. Montgomery Jr., J. E. Peralta, F. Ogliaro, M. J. Bearpark, J. J. Heyd, E. N. Brothers, K. N. Kudin, V. N. Staroverov, T. A. Keith, R. Kobayashi, J. Normand, K. Raghavachari, A. P. Rendell, J. C. Burant, S. S. Iyengar, J. Tomasi, M. Cossi, J. M. Millam, M. Klene, C. Adamo, R. Cammi, J. W. Ochterski, R. L. Martin, K. Morokuma, O. Farkas, J. B. Foresman, D. J. Fox, *Gaussian 16*, C.02.; Gaussian, Inc.: Wallingford, CT, 2016.
- (6) S. F. Boys, F. J. M. P. Bernardi, *Mol. Phy.* 1970, **19**, 553-566.
- (7) a) E. D. Glendening, J. K. Badenhoop, A. E. Reed, J. E. Carpenter, J. A. Bohmann, C. M. Morales, P. Karafiloglou, C. R. Landis, F. Weinhold, NBO 7.0 (University of Wisconsin, 2018), [https://nbo7.chem.wisc.edu/biblio\\_css.htm](https://nbo7.chem.wisc.edu/biblio_css.htm); b) F. Weinhold, C. R. Landis, E. D. Glendening, *Int. Rev. Phy. Chem.* 2016, **35**, 399–440.
- (8) R. F. W. Bader, In *Atoms in Molecules: A Quantum Theory*; Clarendon Press: Oxford, 1990.
- (9) a) T. Lu, F. Chen, *J. Comput. Chem.* 2012, **33**, 580-592; b) Z. Zhang, T. Lu, *Phys. Chem. Chem. Phys.* 2021, **23**, 20323-20328.
- (10) M. H. Abraham, *Chem. Soc. Rev.* 1993, **22**, 73-83.

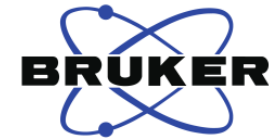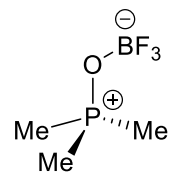

**TOB-1**

500 MHz <sup>1</sup>H NMR

CDCl<sub>3</sub>

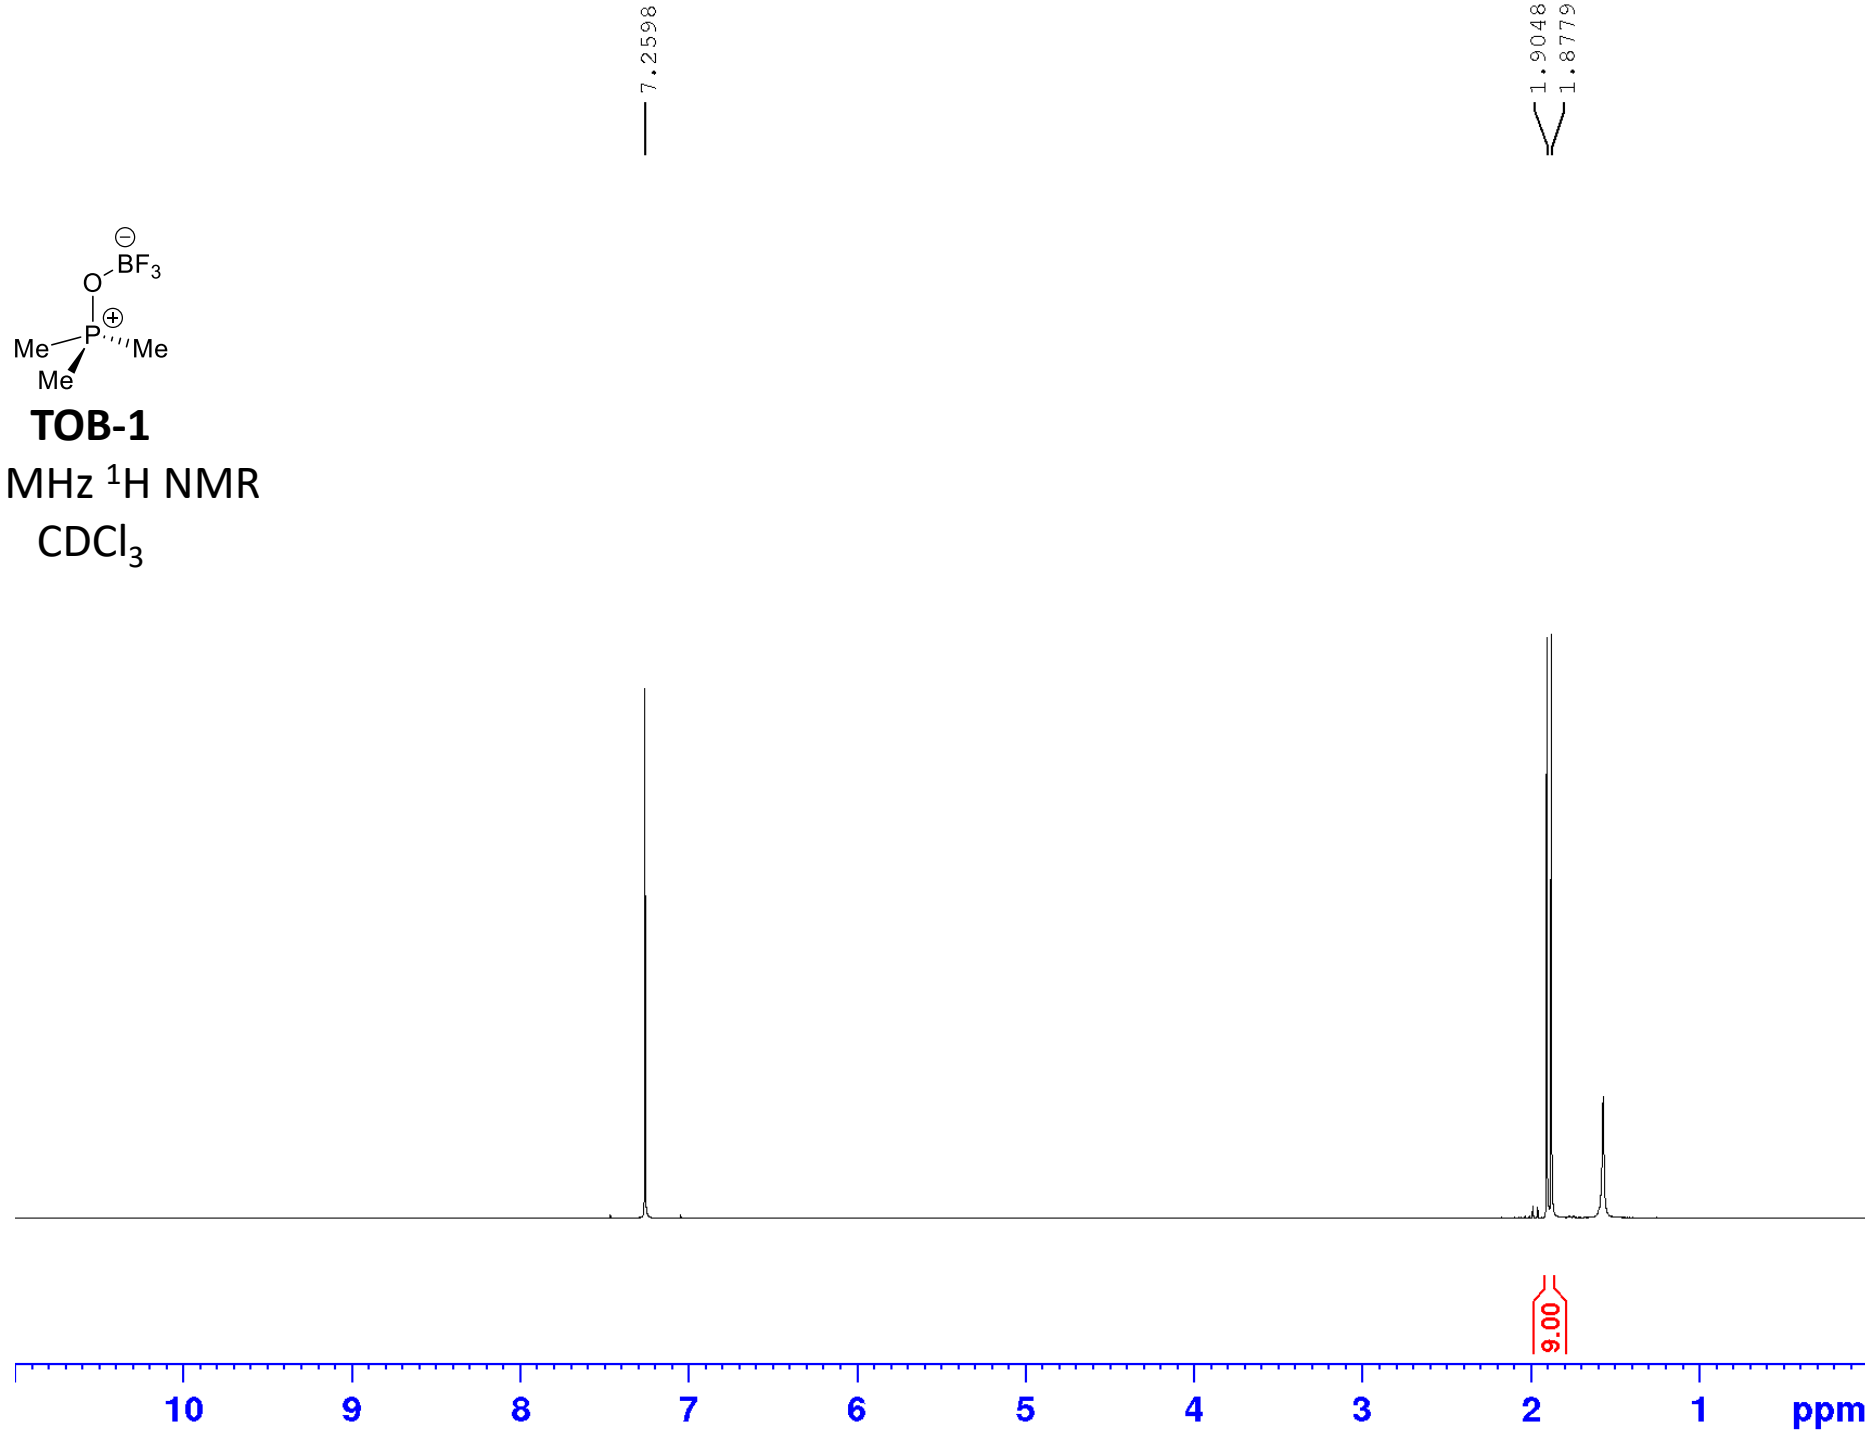

Current Data Parameters  
NAME vinn-4-046-2nd-PM30BF3-20201011  
EXPNO 1  
PROCNO 1

F2 - Acquisition Parameters  
Date\_ 20201015  
Time 22.33 h  
INSTRUM spect  
PROBHD z119470\_0283 1  
PULPROG zg30  
ID 65536  
SOLVENT cdcl3  
NS 16  
DS 2  
SWH 10000.000 Hz  
FIDRES 0.305176 Hz  
AQ 3.2767999 sec  
RG 206.72  
DW 50.000 usec  
DE 6.50 usec  
TE 295.2 K  
D1 1.00000000 sec  
TD 1  
SF01 500.1330883 MHz  
NUC1 1H  
P1 10.91 usec  
PLW1 25.00000000 W

F2 - Processing parameters  
SI 65536  
SF 500.1300124 MHz  
WDW EM  
SSB 0  
LB 0.30 Hz  
GB 0  
PC 1.00

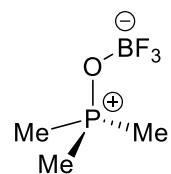

**TOB-1**

125 MHz <sup>13</sup>C NMR  
CDCl<sub>3</sub>

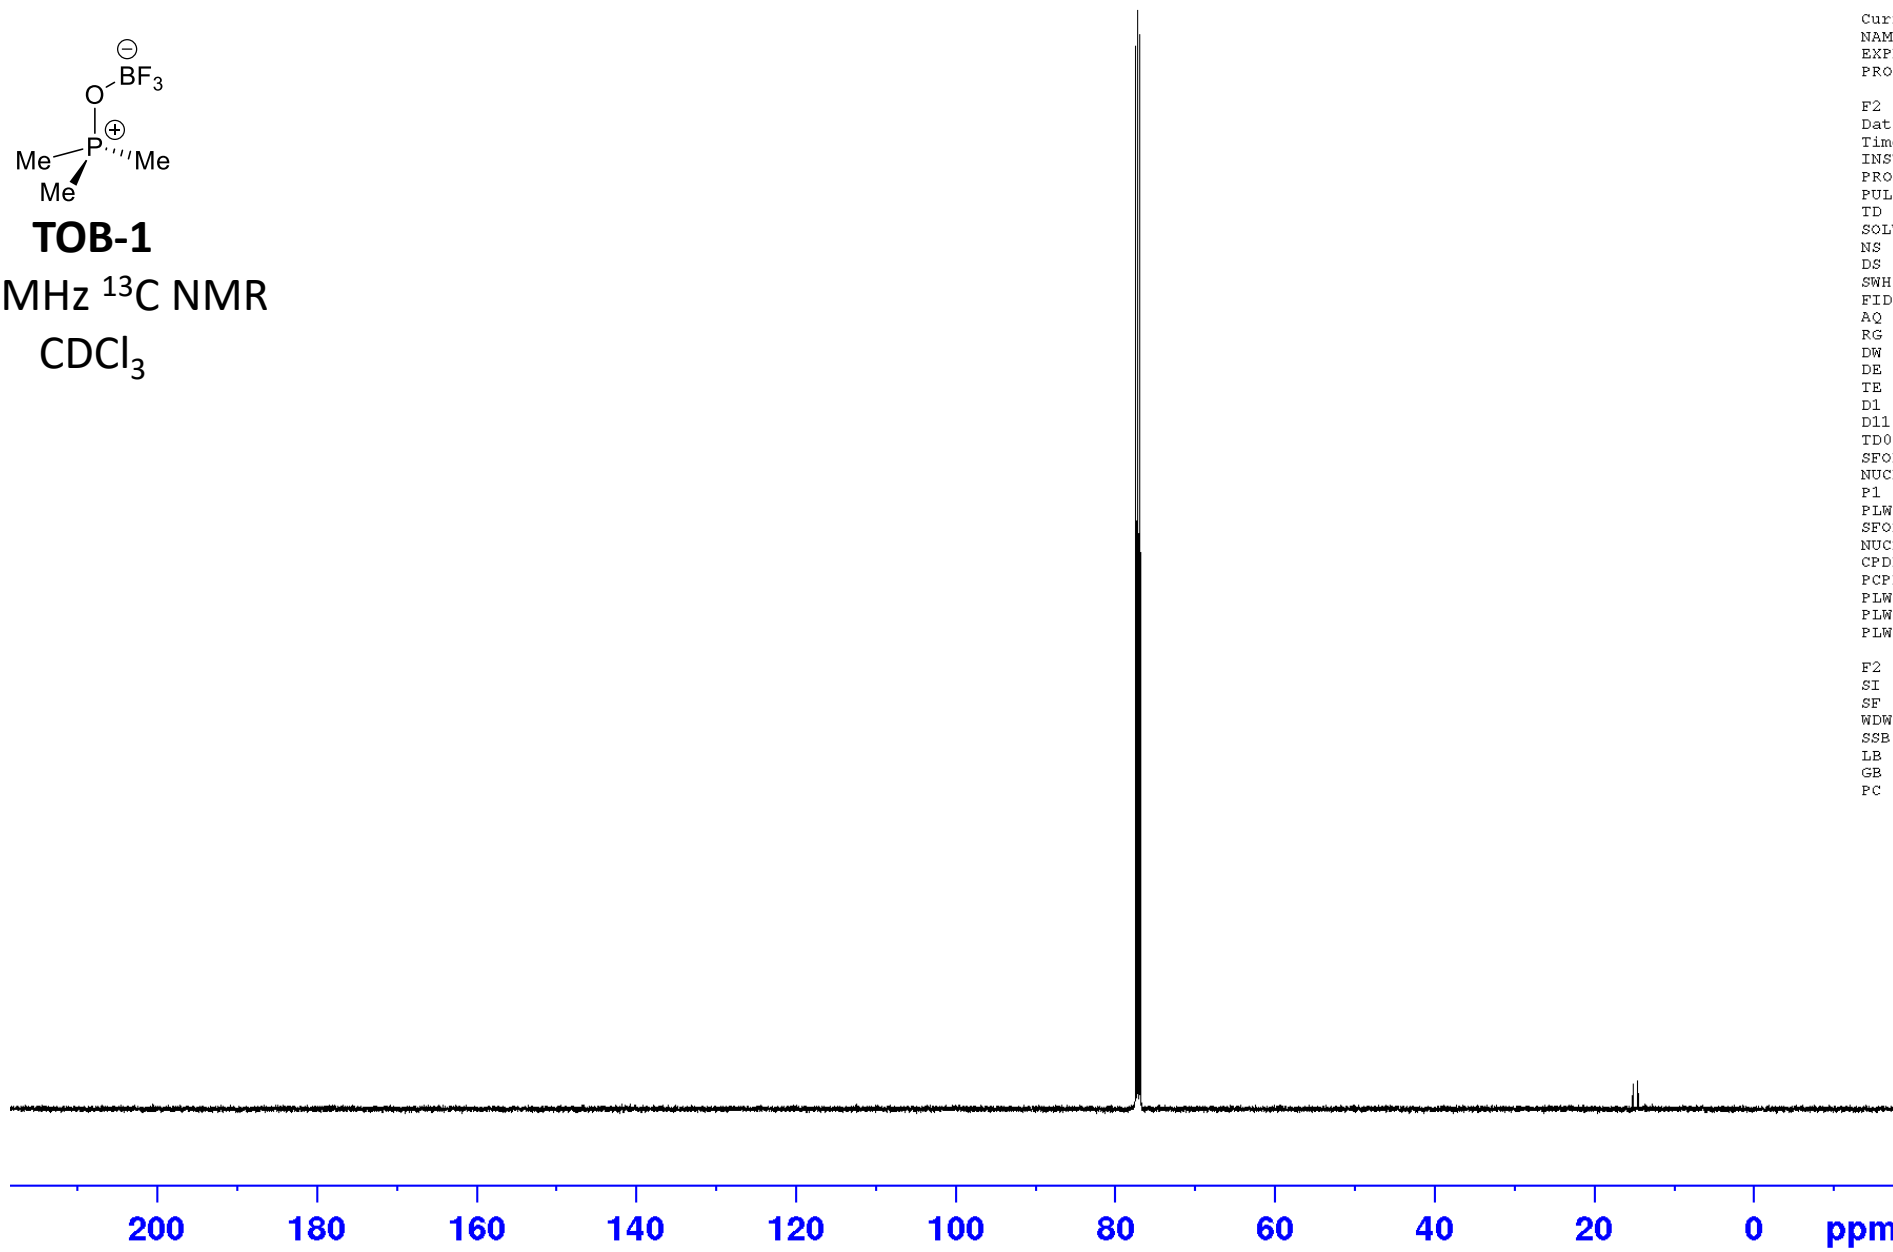

77.41  
77.16  
76.90

15.12  
14.55

Current Data Parameters  
NAME vinn-4-046-2nd-PMe3OBF3-2021  
EXPNO 2  
PROCNO 1

F2 - Acquisition Parameters

Date\_ 20201015  
Time 23.28 h  
INSTRUM spect  
PROBHD z119470\_0283 (  
PULPROG zgpg30  
TD 65536  
SOLVENT cdcl3  
NS 1024  
DS 4  
SWH 29761.904 Hz  
FIDRES 0.908261 Hz  
AQ 1.1010048 sec  
RG 206.72  
DW 16.800 usec  
DE 6.50 usec  
TE 295.1 K  
D1 2.00000000 sec  
D11 0.03000000 sec  
TD0 1  
SFO1 125.7703643 MHz  
NUC1 13C  
P1 9.75 usec  
PLW1 94.00000000 W  
SFO2 500.1320005 MHz  
NUC2 1H  
CPDPRG[2] waltz16  
PCPD2 80.00 usec  
PLW2 25.00000000 W  
PLW12 0.46495000 W  
PLW13 0.23387000 W

F2 - Processing parameters

SI 32768  
SF 125.7577726 MHz  
WDW EM  
SSB 0  
LB 1.00 Hz  
GB 0  
PC 1.40

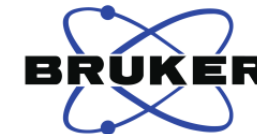

**TOB-1**

160 MHz <sup>11</sup>B NMR

CDCl<sub>3</sub>

-0.9252

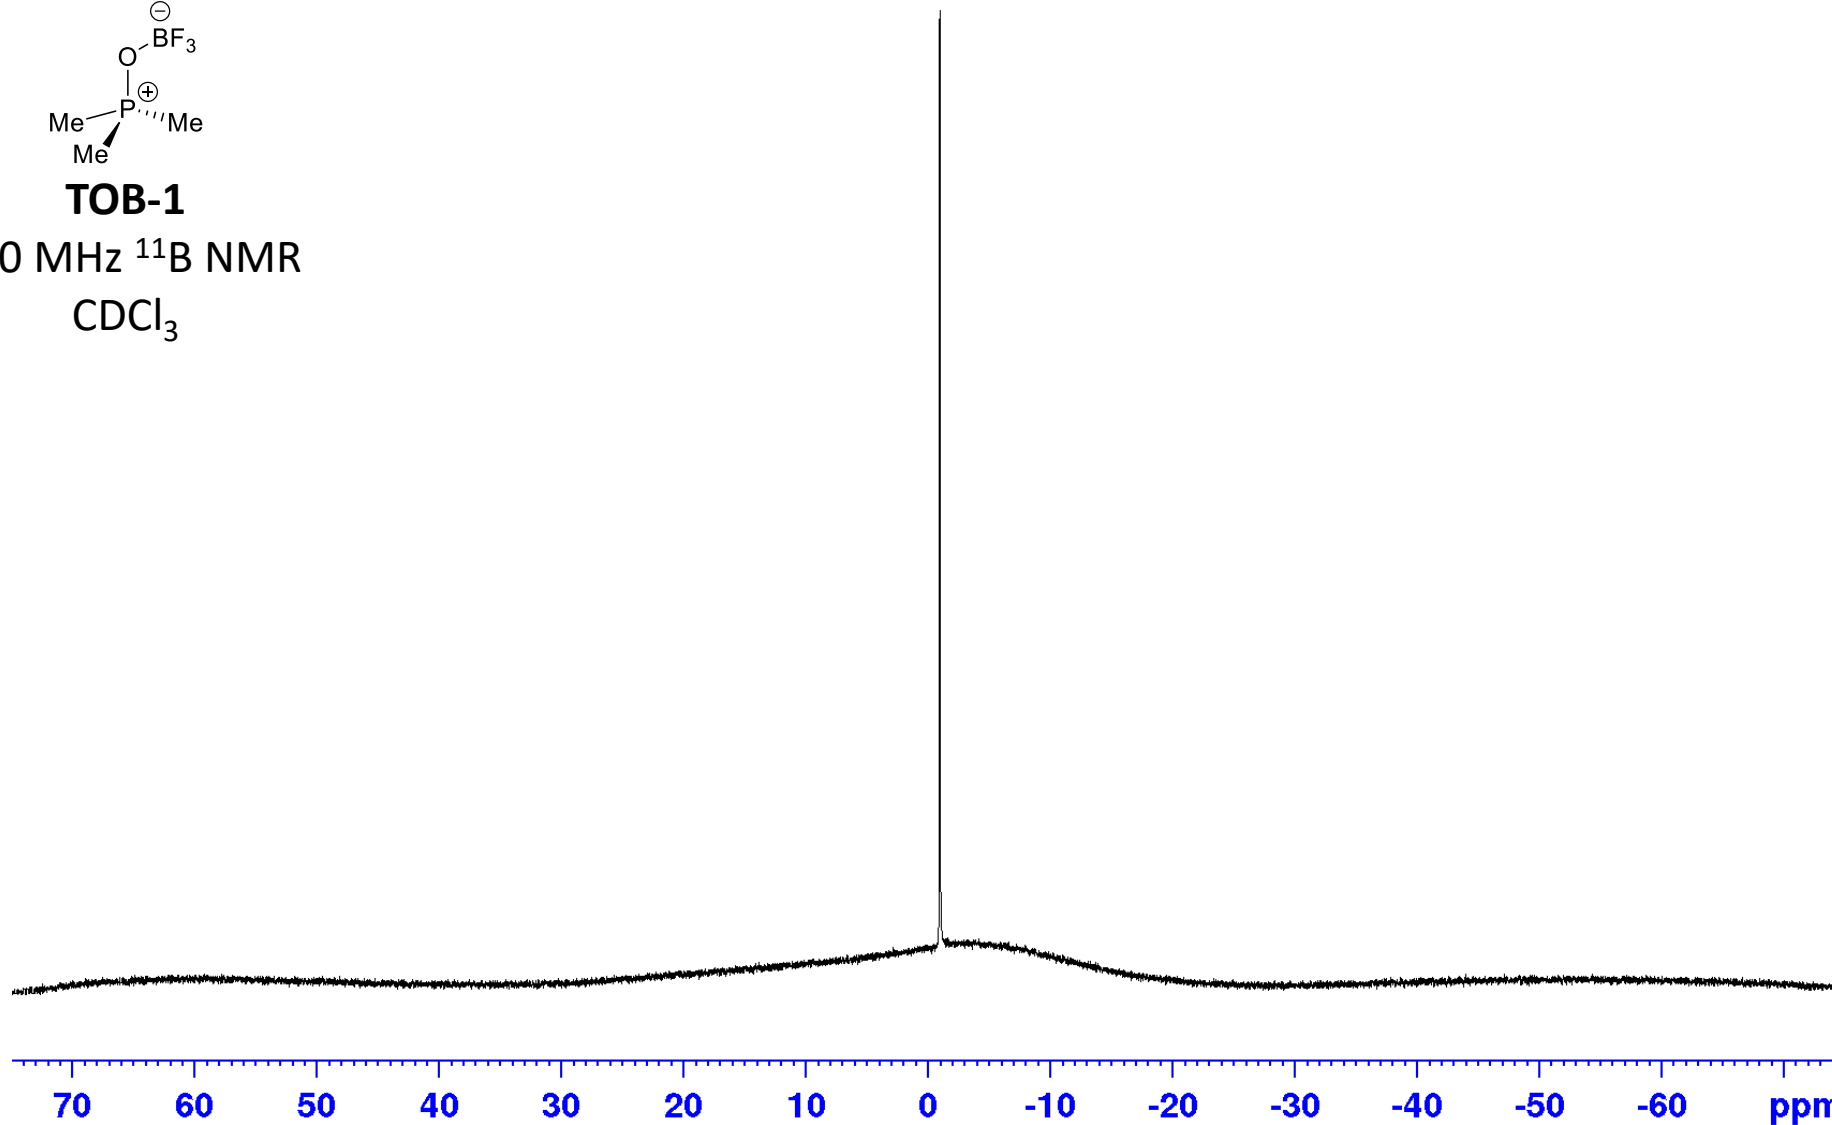

Current Data Parameters  
NAME vinn-4-046-2nd-PMe3CBF3-20201015  
EXPNO 3  
PROCNO 1

F2 - Acquisition Parameters  
Date\_ 20201015  
Time 23.29 h  
INSTRUM spect  
PROBHD z119470\_0283 (  
PULPROG zgig  
TD 32768  
SOLVENT CDCl3  
NS 16  
DS 4  
SWH 24038.461 Hz  
FIDRES 1.467191 Hz  
AQ 0.6815744 sec  
RG 206.72  
DW 20.800 usec  
DE 6.50 usec  
TE 295.2 K  
D1 1.00000000 sec  
D11 0.03000000 sec  
TD0 1  
SFO1 160.4615790 MHz  
NUC1 11B  
P1 16.00 usec  
PLW1 50.00000000 W  
SFO2 500.1320005 MHz  
NUC2 1H  
CPDPRG[2] waltz16  
PCPD2 80.00 usec  
PLW2 25.00000000 W  
PLW12 0.46495000 W

F2 - Processing parameters  
SI 16384  
SF 160.4615792 MHz  
WDW EM  
SSB 0  
LB 1.00 Hz  
GB 0  
PC 1.40



**TOB-1**

470 MHz <sup>19</sup>F NMR

CDCl<sub>3</sub>

— -146.0408

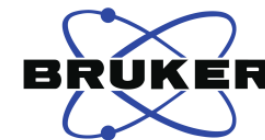

Current Data Parameters  
NAME vinn-4-046-2nd-PMe3OBF3-20201015  
EXPNO 4  
PROCNO 1

F2 - Acquisition Parameters  
Date\_ 20201015  
Time 23.31 h  
INSTRUM spect  
PROBHD z119470\_0283 (  
PULPROG zgflqn  
TD 131072  
SOLVENT CDCl3  
NS 32  
DS 4  
SWH 113636.367 Hz  
FIDRES 1.733953 Hz  
AQ 0.5767168 sec  
RG 206.72  
DW 4.400 usec  
DE 6.50 usec  
TE 295.2 K  
D1 1.00000000 sec  
TD0 1  
SF01 470.5453180 MHz  
NUC1 19F  
P1 15.00 usec  
PLW1 47.23500061 W

F2 - Processing parameters  
SI 65536  
SF 470.5923772 MHz  
WDW EM  
SSB 0  
LB 0.30 Hz  
GB 0  
PC 1.00

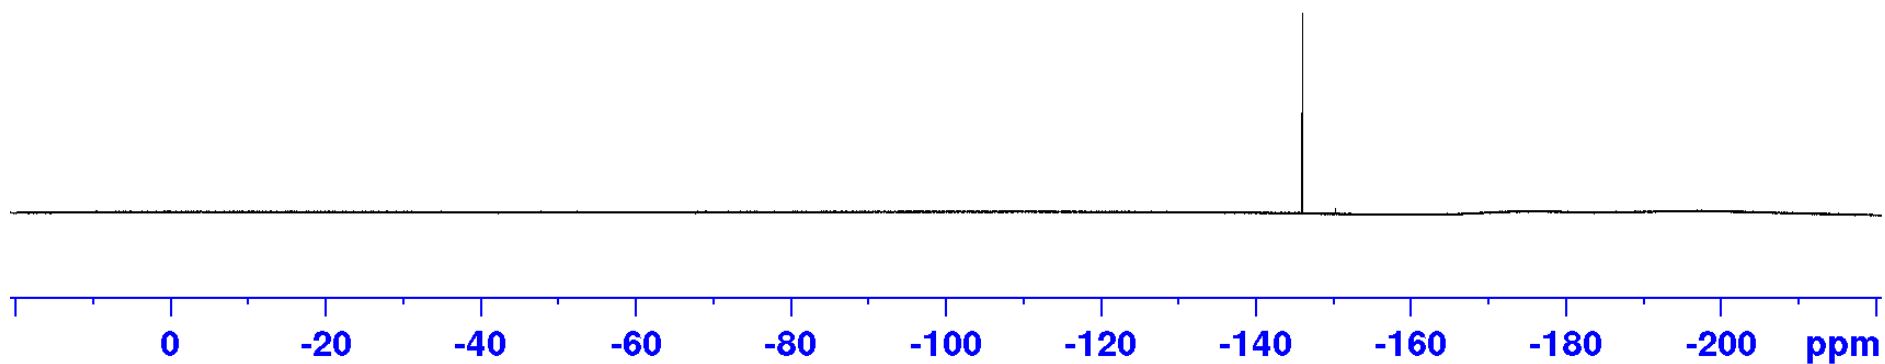



**TOB-1**

200 MHz <sup>31</sup>P NMR

CDCl<sub>3</sub>

— 67.94

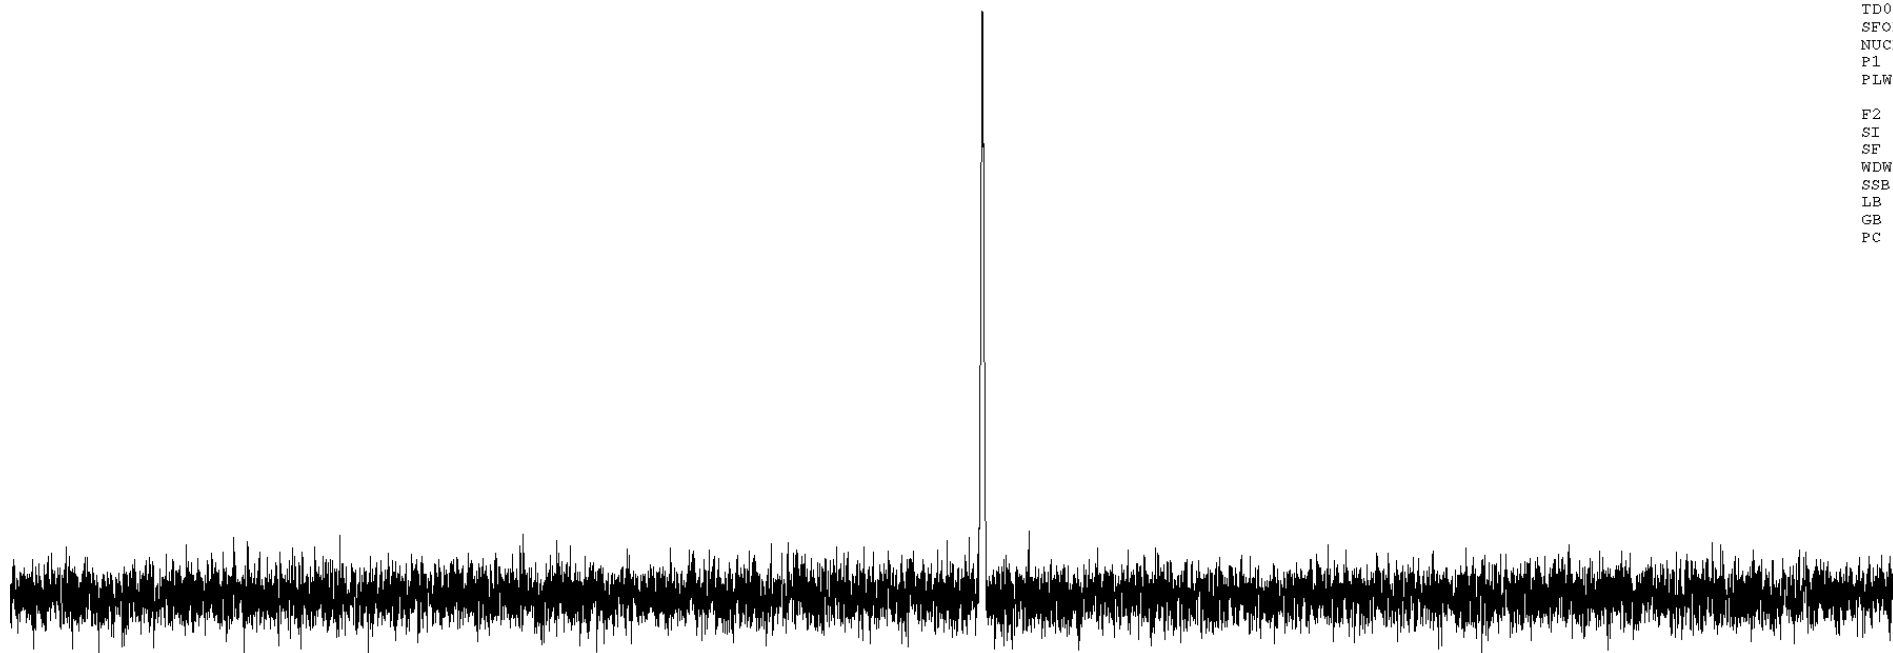

Current Data Parameters  
NAME vinn-4-046-2nd-PMe3OBF3-2021  
EXPNO 5  
PROCNO 1

F2 - Acquisition Parameters  
Date\_ 20201015  
Time 23.35 h  
INSTRUM spect  
PROBHD z119470\_0283 (  
PULPROG zg30  
TD 65536  
SOLVENT CDCl3  
NS 64  
DS 4  
SWH 81521.742 Hz  
FIDRES 2.487846 Hz  
AQ 0.4019541 sec  
RG 206.72  
DW 6.133 usec  
DE 6.50 usec  
TE 295.1 K  
D1 2.00000000 sec  
TD0 1  
SFO1 202.4462121 MHz  
NUC1 31P  
P1 14.00 usec  
PLW1 54.00000000 W

F2 - Processing parameters  
SI 32768  
SF 202.4563350 MHz  
WDW EM  
SSB 0  
LB 1.00 Hz  
GB 0  
PC 1.40

130 120 110 100 90 80 70 60 50 40 30 20 10 ppm

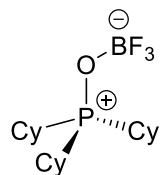

**TOB-2**

400 MHz <sup>1</sup>H NMR

CDCl<sub>3</sub>

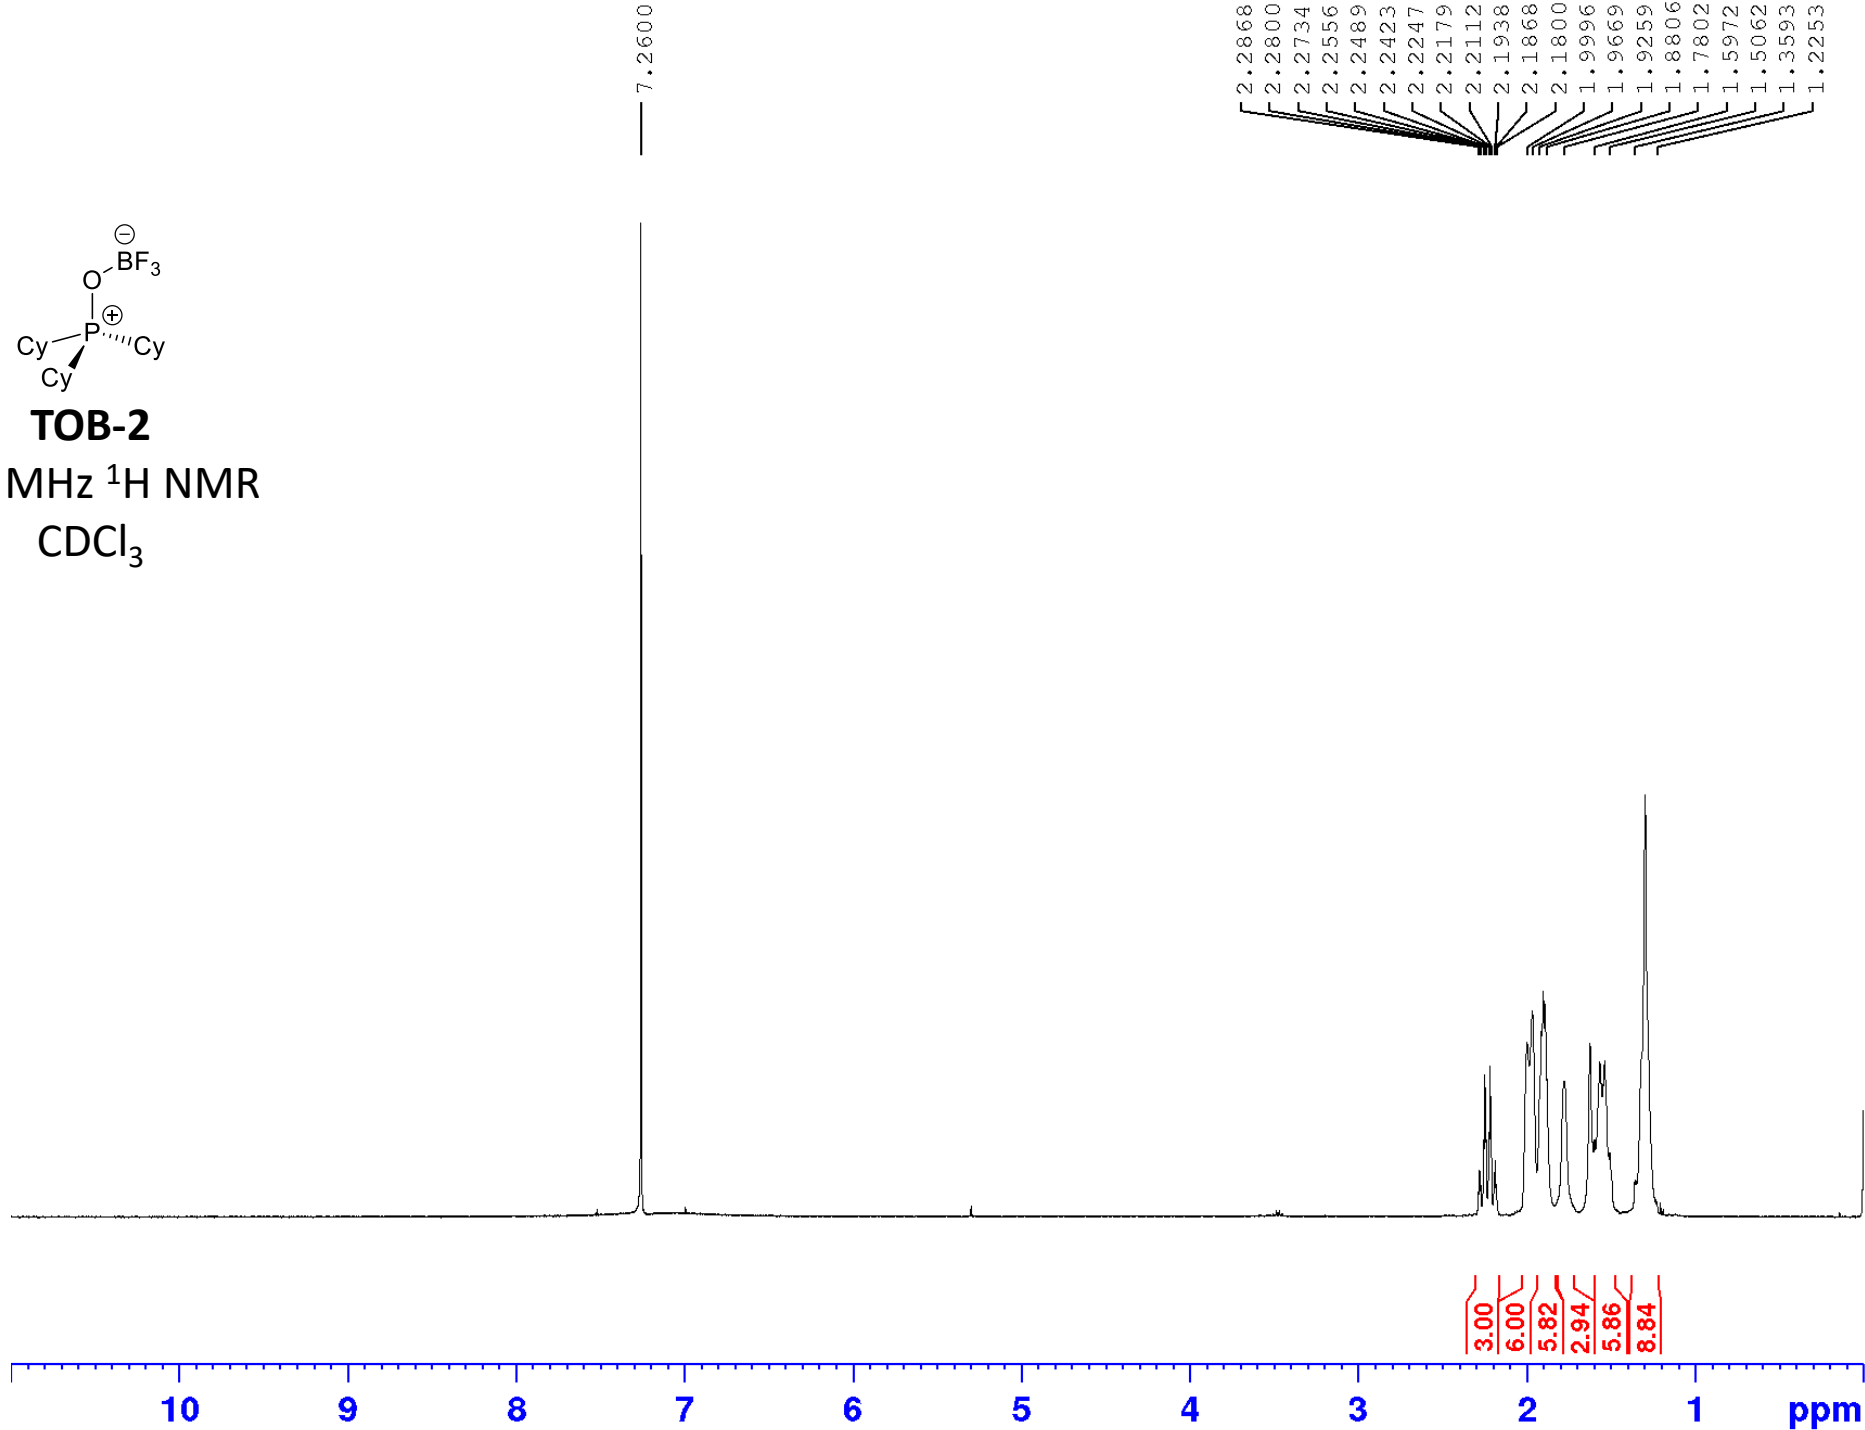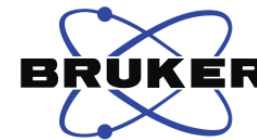

Current Data Parameters  
NAME vinn-1-173-PCy3OBF3-20191211  
EXPMO 1  
PROCNO 1

F2 - Acquisition Parameters

Date\_ 20191211  
Time 11.34 h  
INSTRUM spect  
PROBHD E108618\_0237 (1  
PULPROG zg30  
TD 65536  
SOLVENT CDCl3  
NS 16  
DS 2  
SWH 8012.820 Hz  
FIDRES 0.122266 Hz  
AQ 4.0894465 sec  
RG 161  
DN 62.400 usec  
DE 6.50 usec  
TE 296.0 K  
D1 1.00000000 sec  
TDO 1  
SFO1 400.2324714 MHz  
NUC1 1H  
P1 12.80 usec  
PLW1 13.56000042 W

F2 - Processing parameters

SI 65536  
SF 400.2300100 MHz  
WDW EM  
SSB 0  
LB 0.30 Hz  
GB 0  
PC 1.00





**TOB-2**

125 MHz <sup>13</sup>C NMR

CDCl<sub>3</sub>

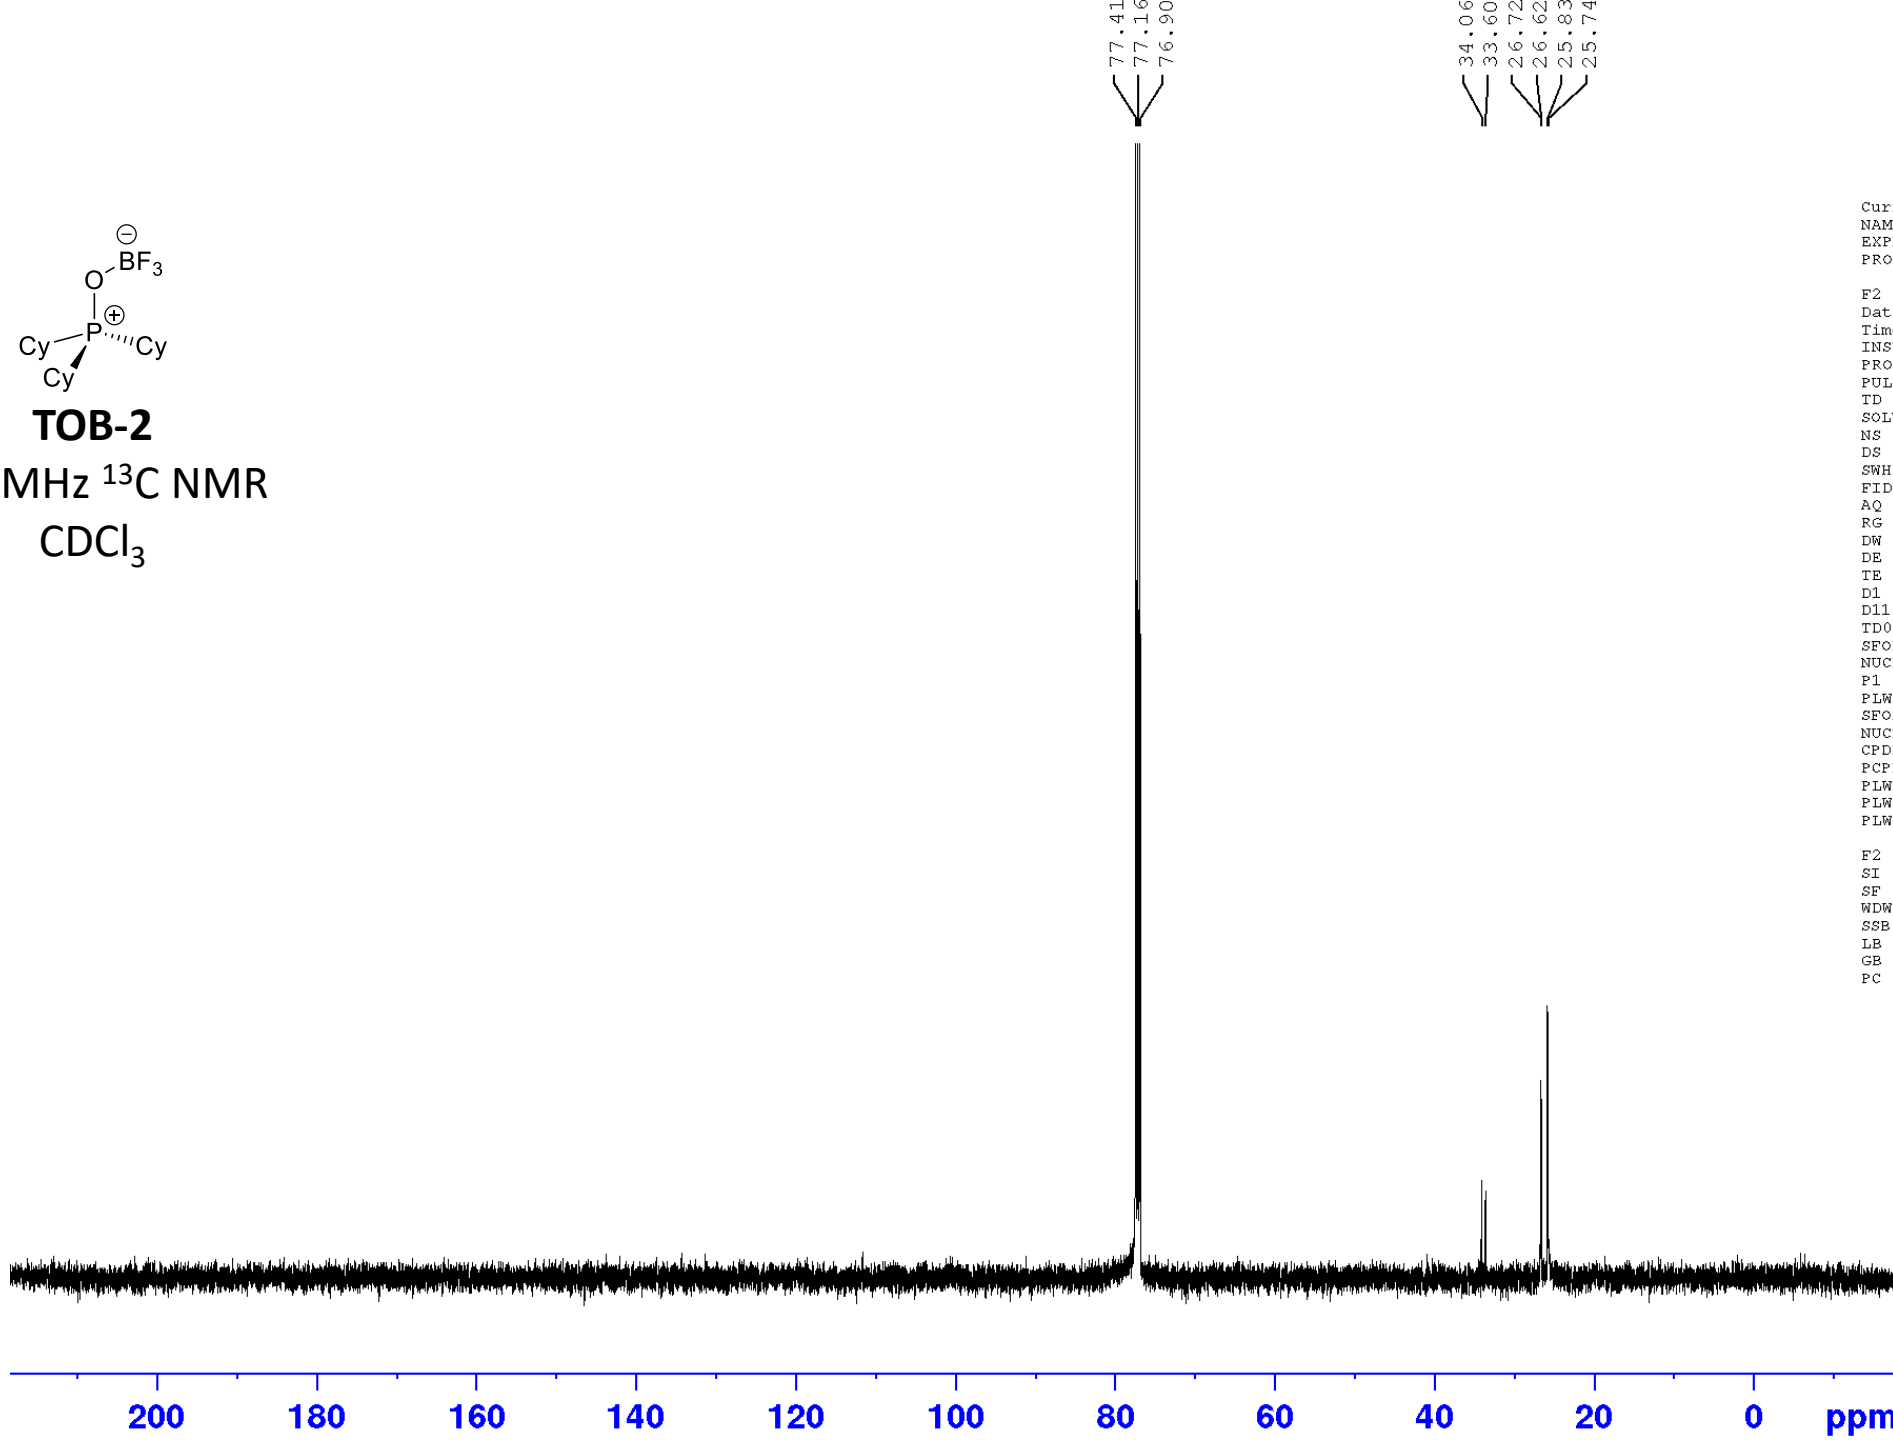

Current Data Parameters  
 NAME vinn-4-026-PCy3OBF3-2020082:  
 EXPNO 2  
 PROCNO 1

F2 - Acquisition Parameters

Date\_ 20200823  
 Time 18.53 h  
 INSTRUM spect  
 PROBHD z119470\_0283 (  
 PULPROG zgpg30  
 TD 65536  
 SOLVENT CDCl3  
 NS 400  
 DS 4  
 SWH 29761.904 Hz  
 FIDRES 0.908261 Hz  
 AQ 1.1010048 sec  
 RG 206.72  
 DW 16.800 usec  
 DE 6.50 usec  
 TE 295.2 K  
 D1 2.00000000 sec  
 D11 0.03000000 sec  
 TD0 1  
 SFO1 125.7703643 MHz  
 NUC1 13C  
 P1 9.75 usec  
 PLW1 94.00000000 W  
 SFO2 500.1320005 MHz  
 NUC2 1H  
 CPDPRG[2] waltz16  
 PCPD2 80.00 usec  
 PLW2 25.00000000 W  
 PLW12 0.39063001 W  
 PLW13 0.19648001 W

F2 - Processing parameters

SI 32768  
 SF 125.7577735 MHz  
 WDW EM  
 SSB 0  
 LB 1.00 Hz  
 GB 0  
 PC 1.40

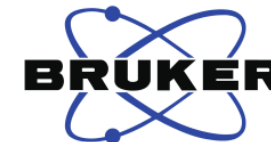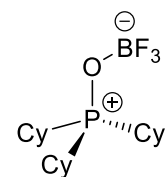

**TOB-2**

160 MHz <sup>11</sup>B NMR

CDCl<sub>3</sub>

-1.0258

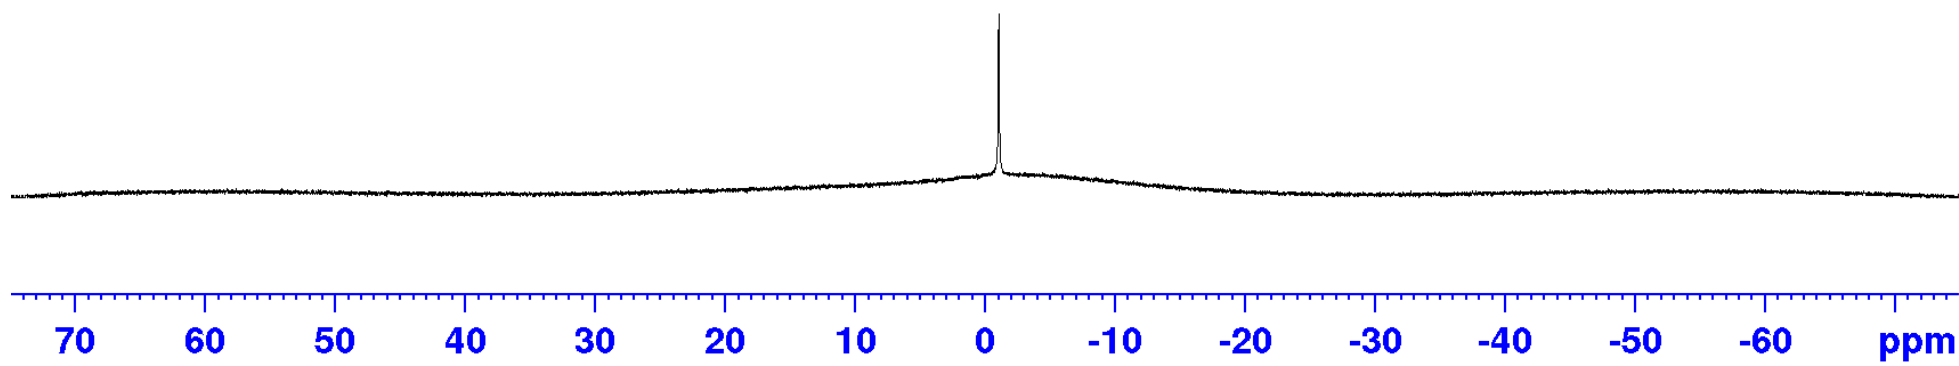

Current Data Parameters  
NAME vinn-4-026-Pcy3OBF3-20200822  
EXFNO 3  
PROCNO 1

F2 - Acquisition Parameters

Date\_ 20200823  
Time 18.55 h  
INSTRUM spect  
PROBHD E119470\_0283 (   
PULPROG zgig  
TD 32768  
SOLVENT CDCl3  
NS 16  
DS 4  
SWH 24038.461 Hz  
FIDRES 1.467191 Hz  
AQ 0.6815744 sec  
RG 206.72  
DW 20.800 usec  
DE 6.50 usec  
TE 295.2 K  
D1 1.00000000 sec  
D11 0.03000000 sec  
TD0 1  
SFO1 160.4615790 MHz  
NUC1 11B  
P1 16.00 usec  
PLW1 50.00000000 W  
SFO2 500.1320005 MHz  
NUC2 1H  
CPDPRG[2] waltz16  
PCPD2 80.00 usec  
PLW2 25.00000000 W  
PLW12 0.39063001 W

F2 - Processing parameters  
SI 16384  
SF 160.4615792 MHz  
WDW EM  
SSE 0  
LB 1.00 Hz  
GB 0  
PC 1.40



**TOB-2**

470 MHz <sup>19</sup>F NMR

CDCl<sub>3</sub>

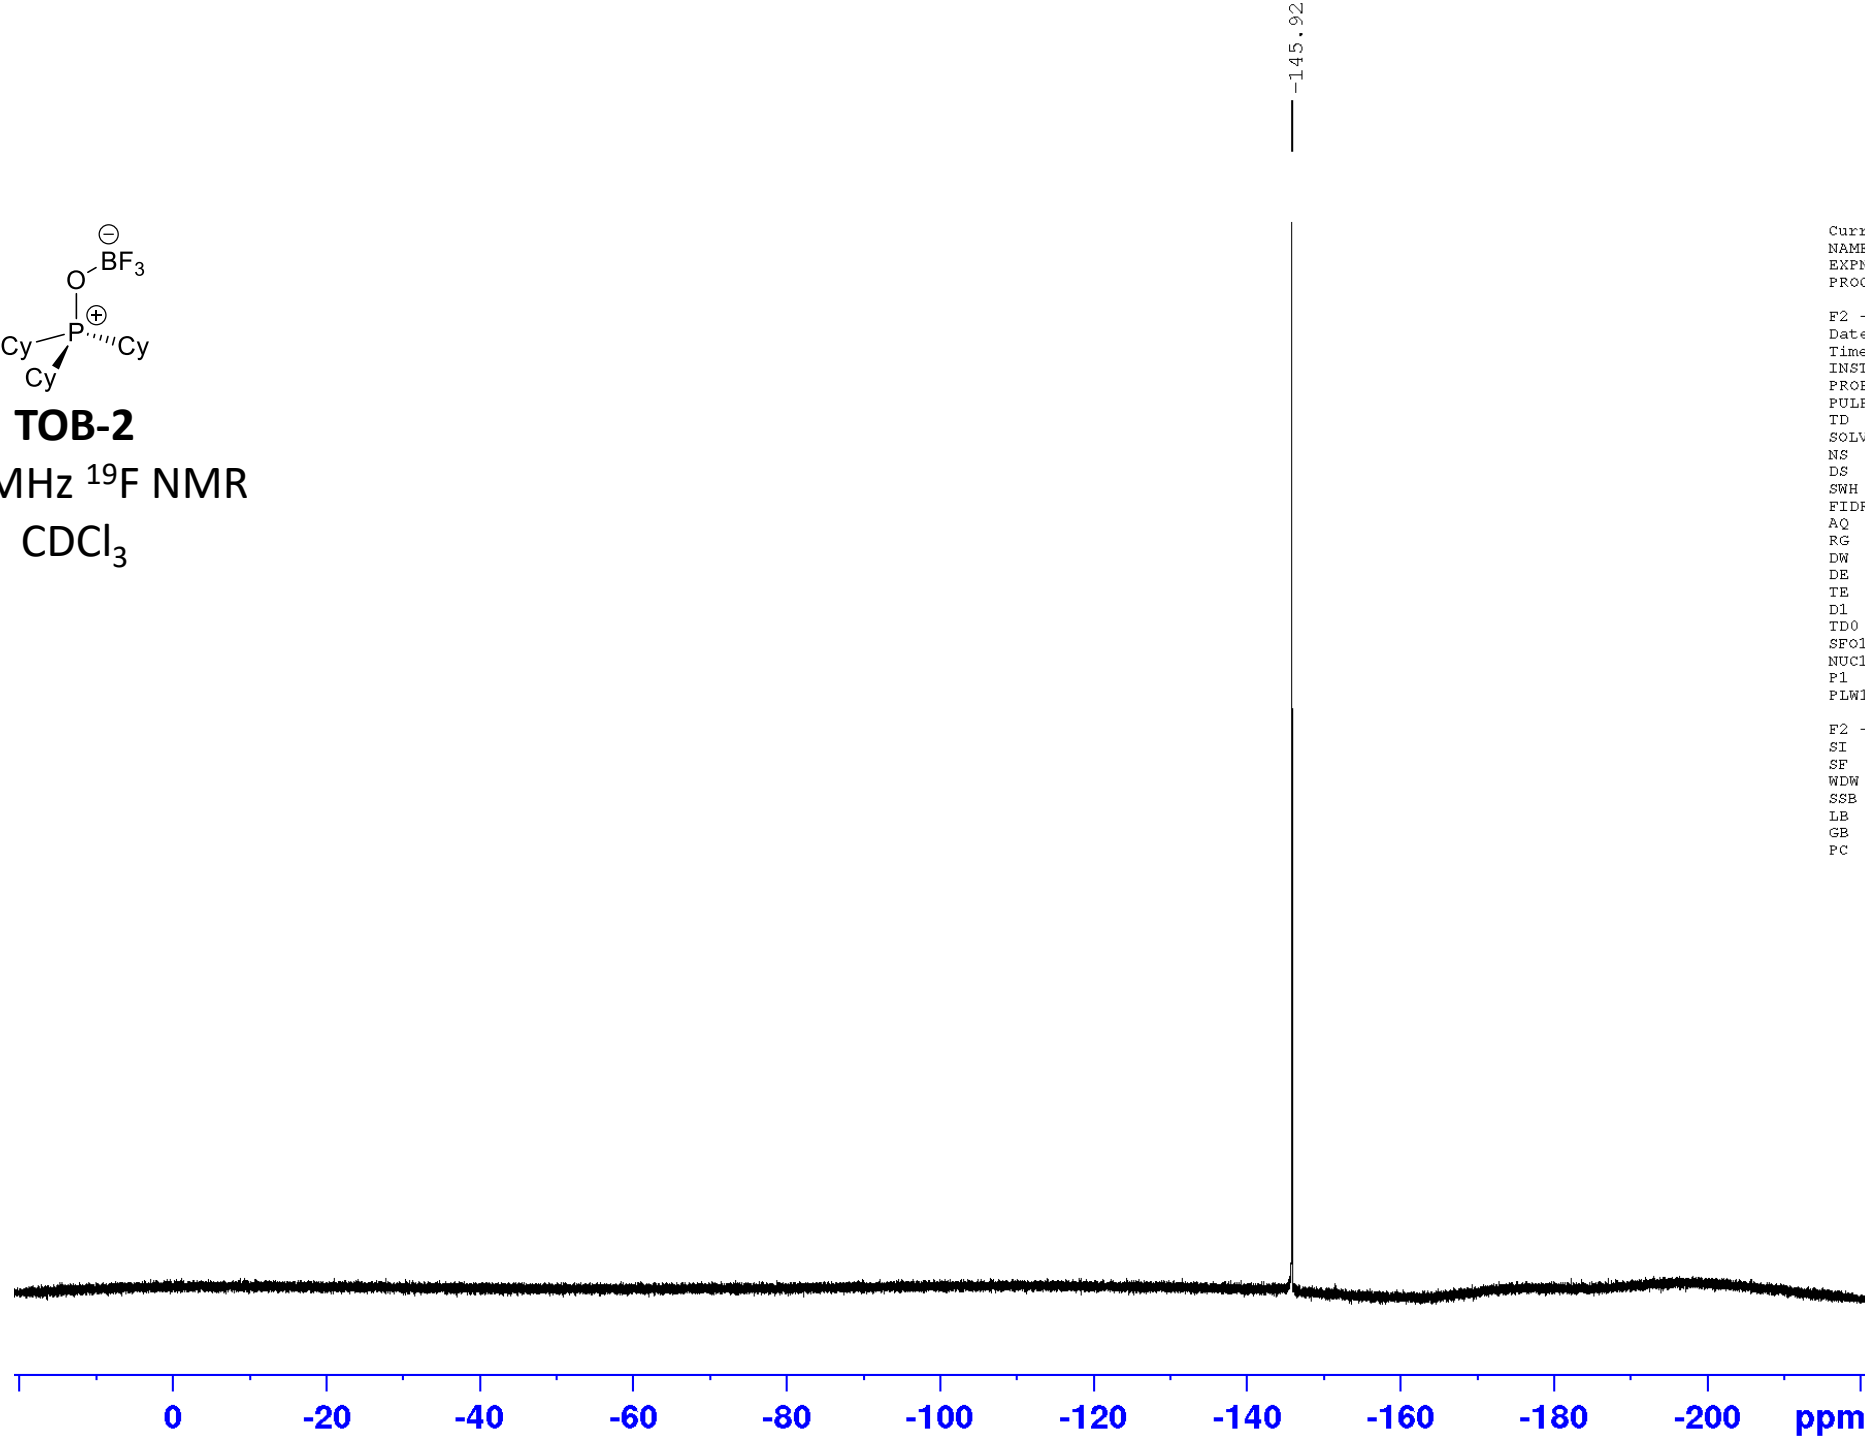

Current Data Parameters  
NAME vinn-4-026-PCy3OBf3-2020082:  
EXPNO 4  
PROCNO 1

F2 - Acquisition Parameters  
Date\_ 20200823  
Time 18.56 h  
INSTRUM spect  
PROBHD z119470\_0283 (  
PULPROG zgflgn  
TD 131072  
SOLVENT CDCl3  
NS 16  
DS 4  
SWH 113636.367 Hz  
FIDRES 1.733953 Hz  
AQ 0.5767168 sec  
RG 206.72  
DW 4.400 usec  
DE 6.50 usec  
TE 295.2 K  
D1 1.00000000 sec  
TD0 1  
SFO1 470.5453180 MHz  
NUC1 19F  
P1 15.00 usec  
PLW1 47.23500061 W

F2 - Processing parameters  
SI 65536  
SF 470.5923772 MHz  
WDW EM  
SSB 0  
LB 0.30 Hz  
GB 0  
PC 1.00



**TOB-2**

200 MHz <sup>31</sup>P NMR

CDCl<sub>3</sub>

70.09

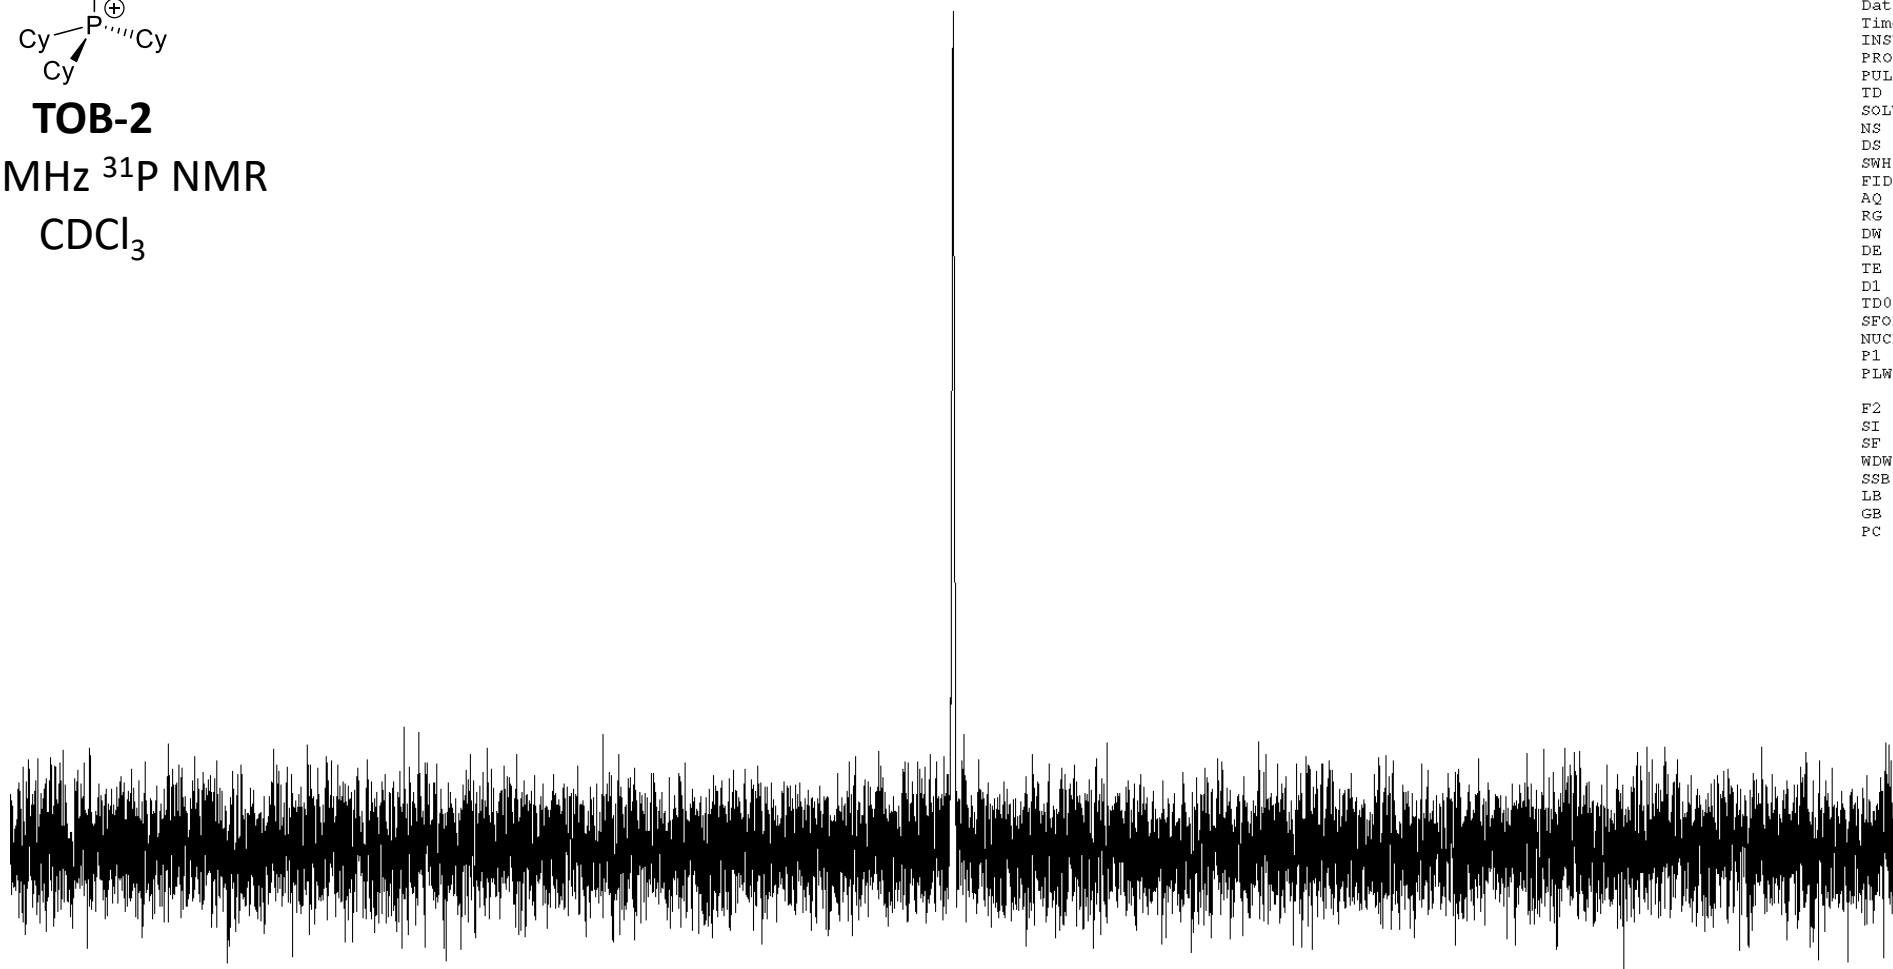

Current Data Parameters  
NAME vinn-4-026-PCy3OBf3-2020082:  
EXPNO 5  
PROCNO 1

F2 - Acquisition Parameters  
Date\_ 20200823  
Time 18.58 h  
INSTRUM spect  
PROBHD z119470\_0283 (  
PULPROG zg30  
TD 65536  
SOLVENT CDCl3  
NS 32  
DS 4  
SWH 81521.742 Hz  
FIDRES 2.487846 Hz  
AQ 0.4019541 sec  
RG 206.72  
DW 6.133 usec  
DE 6.50 usec  
TE 295.1 K  
D1 2.00000000 sec  
TD0 1  
SFO1 202.4462121 MHz  
NUC1 31P  
P1 14.00 usec  
PLW1 54.00000000 W

F2 - Processing parameters  
SI 32768  
SF 202.4563350 MHz  
WDW EM  
SSB 0  
LB 1.00 Hz  
GB 0  
PC 1.40

130 120 110 100 90 80 70 60 50 40 30 20 10 ppm

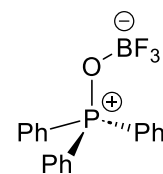

**TOB-3**

500 MHz <sup>1</sup>H NMR

CDCl<sub>3</sub>

7.767  
7.751  
7.740  
7.726  
7.714  
7.711  
7.698  
7.596  
7.589  
7.580  
7.573  
7.565  
7.558  
7.260

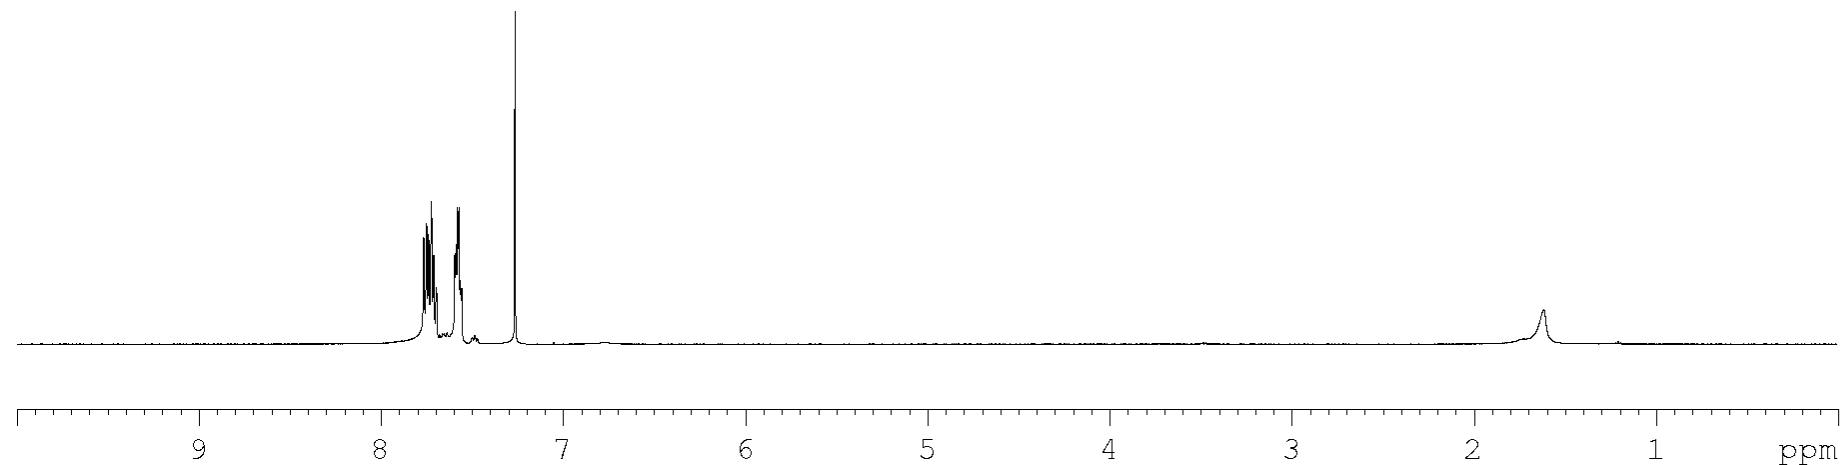

3.00  
2.01

```

Current Data Parameters
NAME      vinn-3-102-FFh3oBF3-cdc13-2020111
EXPNO     1
PROCNO    1

F2 - Acquisition Parameters
Date_     20201114
Time      12.09 h
INSTRUM   spect
PROBHD    zg30
PULPROG   zg30
TD         65536
SOLVENT   CDCl3
NS         16
DS         2
SWH        10000.000 Hz
FIDRES     0.305176 Hz
AQ         3.2767999 sec
RG         142.5
DW         50.000 usec
DE         6.50 usec
TE         295.2 K
D1         1.00000000 sec
TD0        1
SFO1      500.1330883 MHz
NUC1       1H
P1         10.91 usec
PLW1       25.00000000 W

F2 - Processing parameters
SI         65536
SF         500.1300127 MHz
WDW        EM
SSB        0
LB         0.30 Hz
GB         0
PC         1.00

```

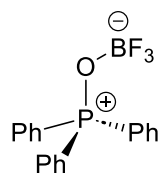

**TOB-3**

125 MHz <sup>13</sup>C NMR  
CDCl<sub>3</sub>

134.406  
134.384  
133.242  
133.149  
129.440  
129.334  
125.370  
124.484  
  
77.411  
77.157  
76.903

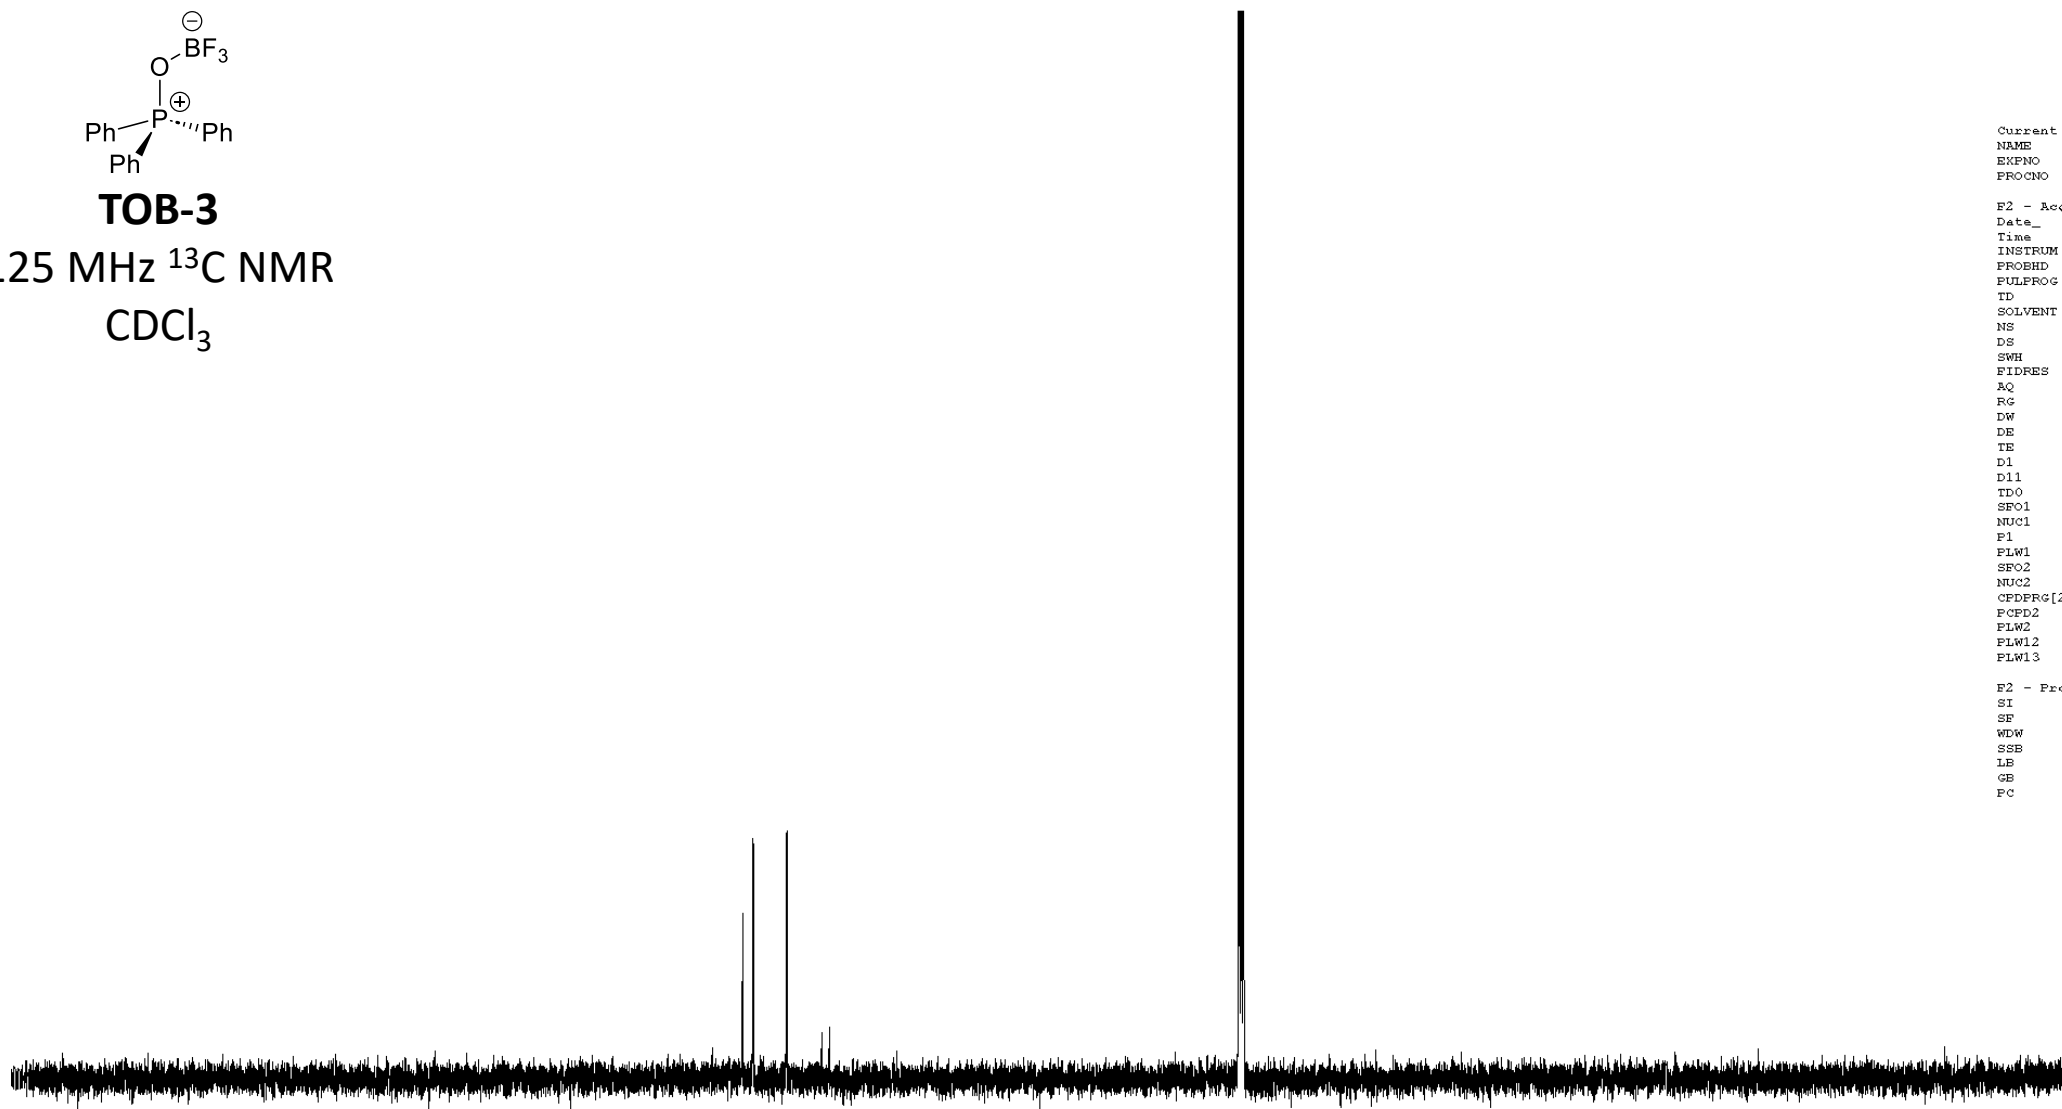

Current Data Parameters  
NAME vinn-3-102-PPH3OBF3-CDCl3-20201114  
EKFNO 6  
PROCNO 1

F2 - Acquisition Parameters  
Date\_ 20201114  
Time 12.31 h  
INSTRUM spect  
PROBHD E119470\_0283 {  
PULPROG zgpg30  
TD 65536  
SOLVENT CDCl3  
NS 256  
DS 4  
SWH 29761.904 Hz  
FIDRES 0.908261 Hz  
AQ 1.1010048 sec  
RG 206.72  
DW 16.800 usec  
DE 6.50 usec  
TE 295.1 K  
D1 2.00000000 sec  
D11 0.03000000 sec  
TD0 1  
SFO1 125.7703643 MHz  
NUC1 13c  
F1 9.75 usec  
PLW1 94.00000000 W  
SFO2 500.1320005 MHz  
NUC2 1H  
CPDPRG[2] waltz16  
PCPD2 80.00 usec  
PLW2 25.00000000 W  
PLW12 0.46495000 W  
PLW13 0.23387000 W

F2 - Processing parameters  
SI 32768  
SF 125.7577729 MHz  
WDW EM  
SSB 0  
LB 1.00 Hz  
GB 0  
PC 1.40



**TOB-3**

160 MHz <sup>11</sup>B NMR

CDCl<sub>3</sub>

— -0.457

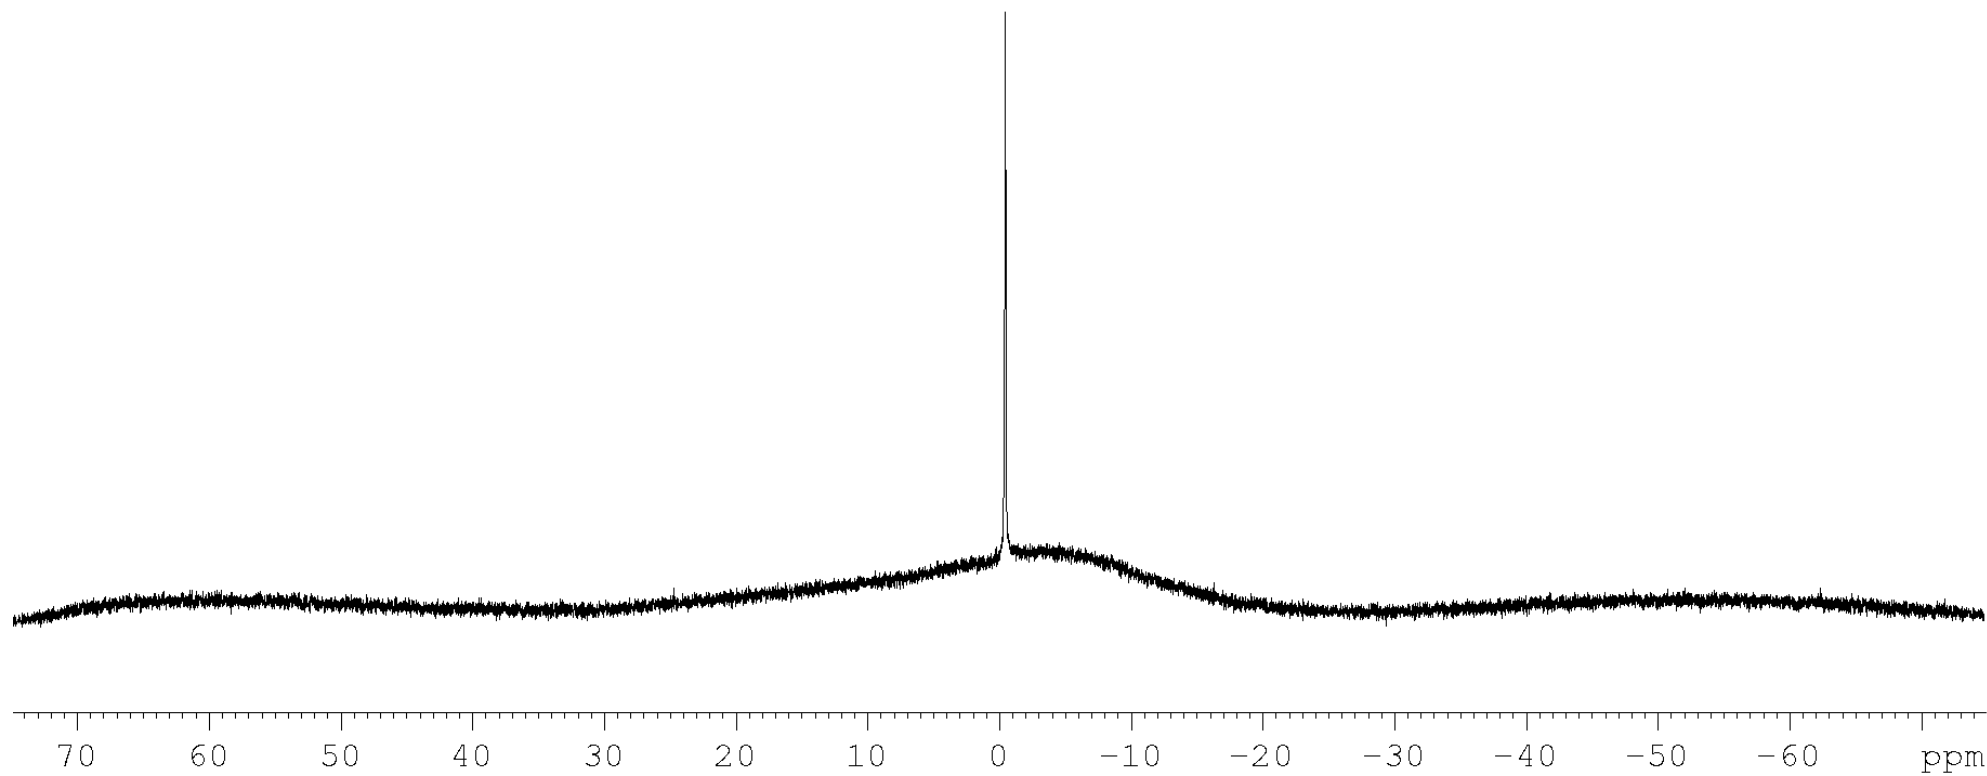

Current Data Parameters  
NAME vinn-3-102-PPh3OBF3-CDCl3-20201111  
EXPNO 2  
PROCNO 1

F2 - Acquisition Parameters

Date\_ 20201114  
Time 12.11 h  
INSTRUM spect  
PROBHD E119470\_0283 {  
PULPROG zgig  
TD 32768  
SOLVENT CDCl3  
NS 8  
DS 4  
SWH 24038.461 Hz  
FIDRES 1.467191 Hz  
AQ 0.6815744 sec  
RG 206.72  
DW 20.800 usec  
DE 6.50 usec  
TE 295.2 K  
D1 1.00000000 sec  
D11 0.03000000 sec  
TD0 1  
SFO1 160.4615790 MHz  
NUC1 11B  
P1 16.00 usec  
PLW1 50.00000000 W  
SFO2 500.1320005 MHz  
NUC2 1H  
CPDPRG[2] waltz16  
PCPD2 80.00 usec  
PLW2 25.00000000 W  
PLW12 0.46495000 W

F2 - Processing parameters

SI 16384  
SF 160.4615792 MHz  
WDW EM  
---

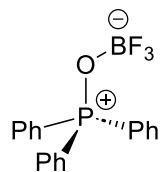

**TOB-3**

470 MHz <sup>19</sup>F NMR

CDCl<sub>3</sub>

— -144.056

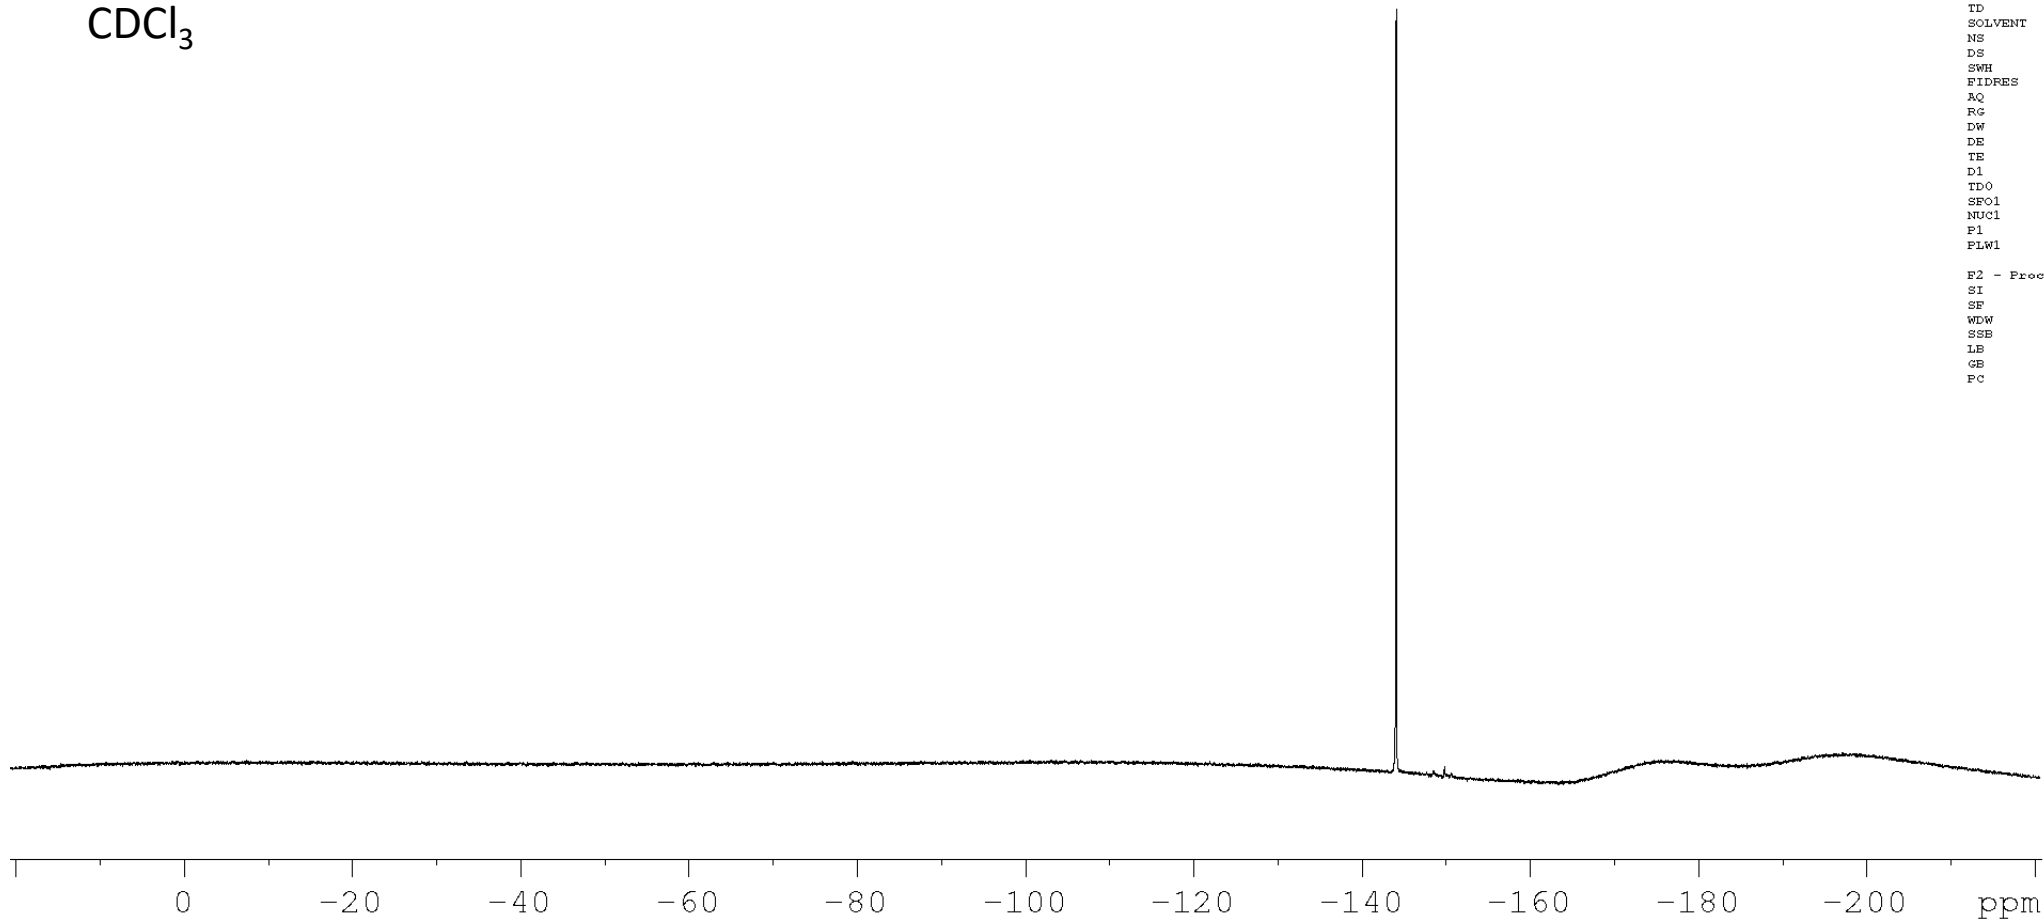

Current Data Parameters  
NAME vinn-3-102-PPh3OBF3-CDCl3-20201114  
EXPNO 3  
PROCNO 1

F2 - Acquisition Parameters

Date\_ 20201114  
Time 12.12 h  
INSTRUM spect  
PROBHD Z119470\_0283 (   
PULPROG zgpg30  
TD 131072  
SOLVENT CDCl3  
NS 16  
DS 4  
SWH 113636.367 Hz  
FIDRES 1.733953 Hz  
AQ 0.5767168 sec  
RG 206.72  
DW 4.400 usec  
DE 6.50 usec  
TE 295.2 K  
D1 1.00000000 sec  
TDO 1  
SFO1 470.5453180 MHz  
NUC1 19F  
P1 15.00 usec  
PLW1 47.23500061 W

F2 - Processing parameters

SI 65536  
SF 470.5923772 MHz  
WDW EM  
SSB 0  
LB 10.00 Hz  
GB 0  
PC 1.00





**TOB-3**

200 MHz <sup>31</sup>P NMR  
CDCl<sub>3</sub>

44.451

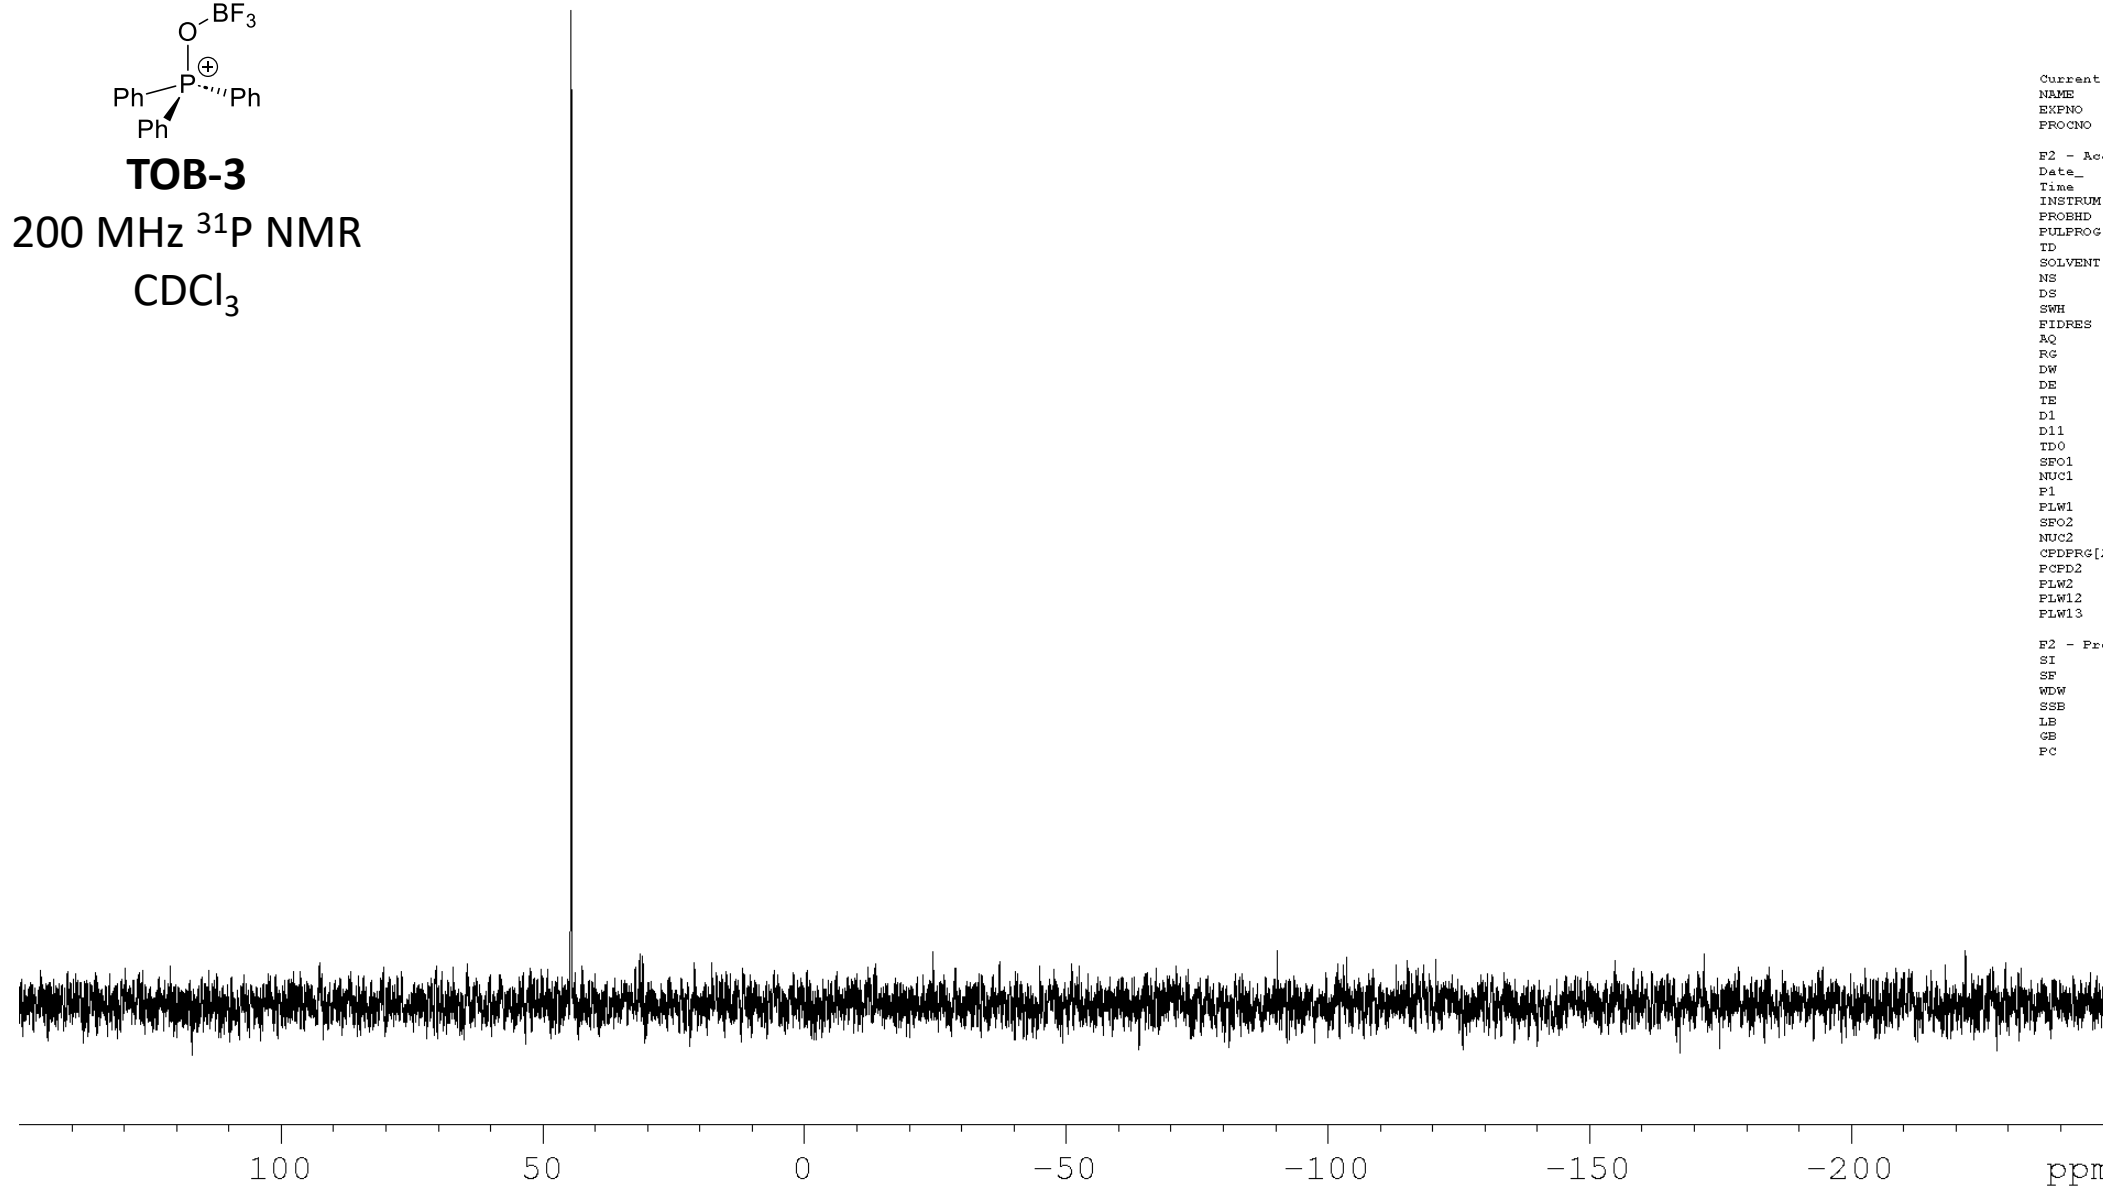

Current Data Parameters  
NAME vinn-3-102-PPh3OBF3-CDCl3-20201114  
EXPNO 5  
PROCNO 1

F2 - Acquisition Parameters

Date\_ 20201114  
Time 12.16 h  
INSTRUM spect  
PROBHD z119470\_0283 ( zggg30  
PULPROG zggg30  
TD 65536  
SOLVENT cdcl3  
NS 16  
DS 4  
SWH 81521.742 Hz  
FIDRES 2.487846 Hz  
AQ 0.4019541 sec  
RG 206.72  
DW 6.133 usec  
DE 6.50 usec  
TE 295.2 K  
D1 2.00000000 sec  
D11 0.03000000 sec  
TDO 1  
SFO1 202.4462121 MHz  
NUC1 31P  
P1 14.00 usec  
PLW1 54.00000000 W  
SFO2 500.1320005 MHz  
NUC2 1H  
CPDPRG2 waltz16  
PCPD2 80.00 usec  
PLW2 25.00000000 W  
PLW12 0.46495000 W  
PLW13 0.23387000 W

F2 - Processing parameters

SI 32768  
SF 202.4563350 MHz  
WDW EM  
SSB 0  
LB 10.00 Hz  
GB 0  
PC 1.40

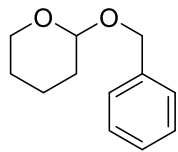

**3a**  
400 MHz  $^1\text{H}$  NMR  
 $\text{CDCl}_3$

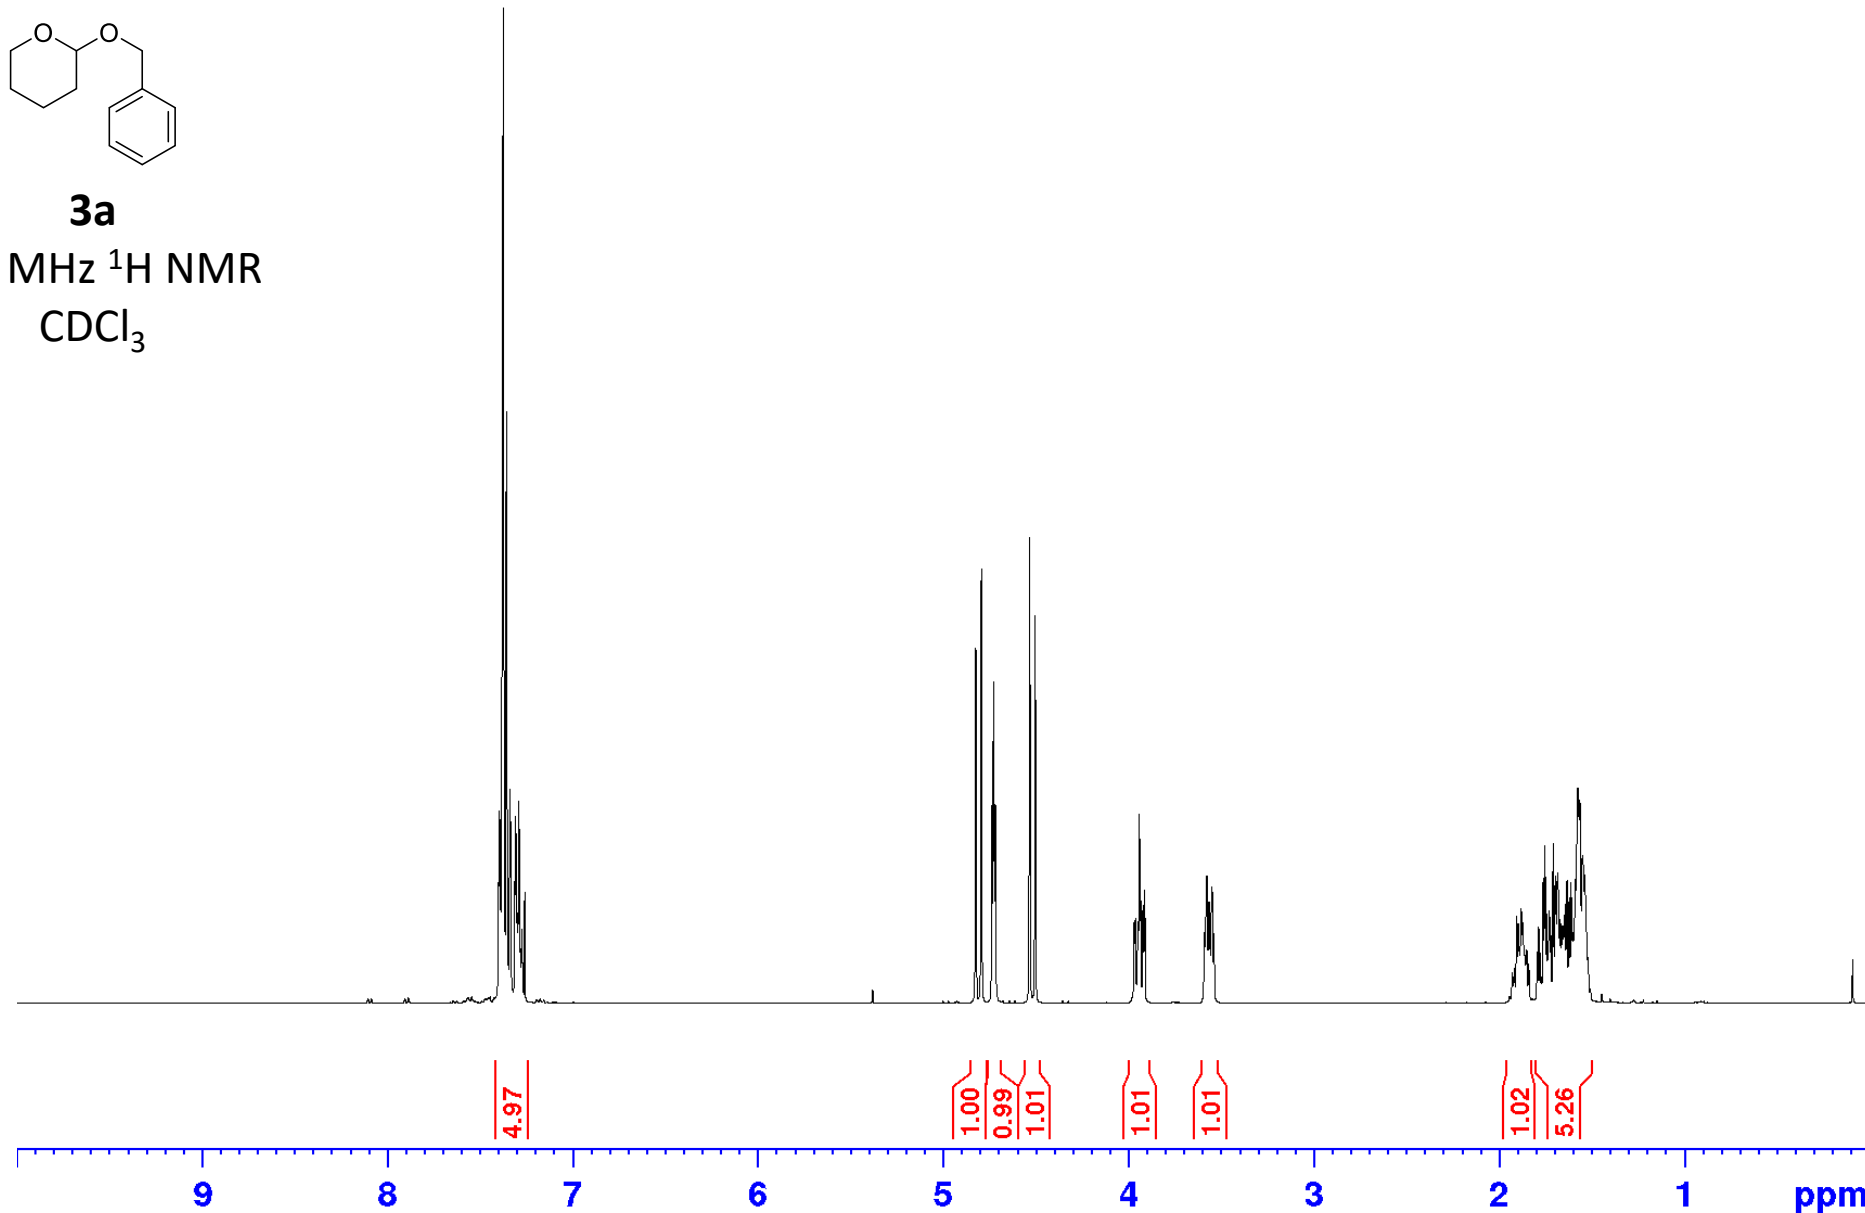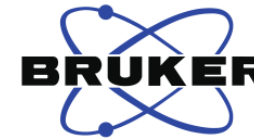

```
Current Data Parameters
NAME       vinn-4-127-islt-20201124
EXPNO     1
PROCNO    1

F2 - Acquisition Parameters
Date_     20201124
Time      12.05 h
INSTRUM   spect
PROBHD    Z820201_0170 (
PULPROG   zg30
TD        65536
SOLVENT   CDCl3
NS        16
DS        2
SWH       8012.820 Hz
FIDRES    0.244532 Hz
AQ        4.0894465 sec
RG        32
DW        62.400 usec
DE        6.50 usec
TE        295.6 K
D1        1.00000000 sec
TDO       1
SFO1      400.1324708 MHz
NUC1      1H
P1        6.75 usec
PLW1      13.17700005 W

F2 - Processing parameters
SI        65536
SF        400.1300098 MHz
WDW       EM
SSB       0
LB        0.30 Hz
GB        0
PC        1.00
```

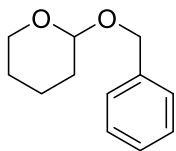

**3a**

100 MHz  $^{13}\text{C}$  NMR  
 $\text{CDCl}_3$

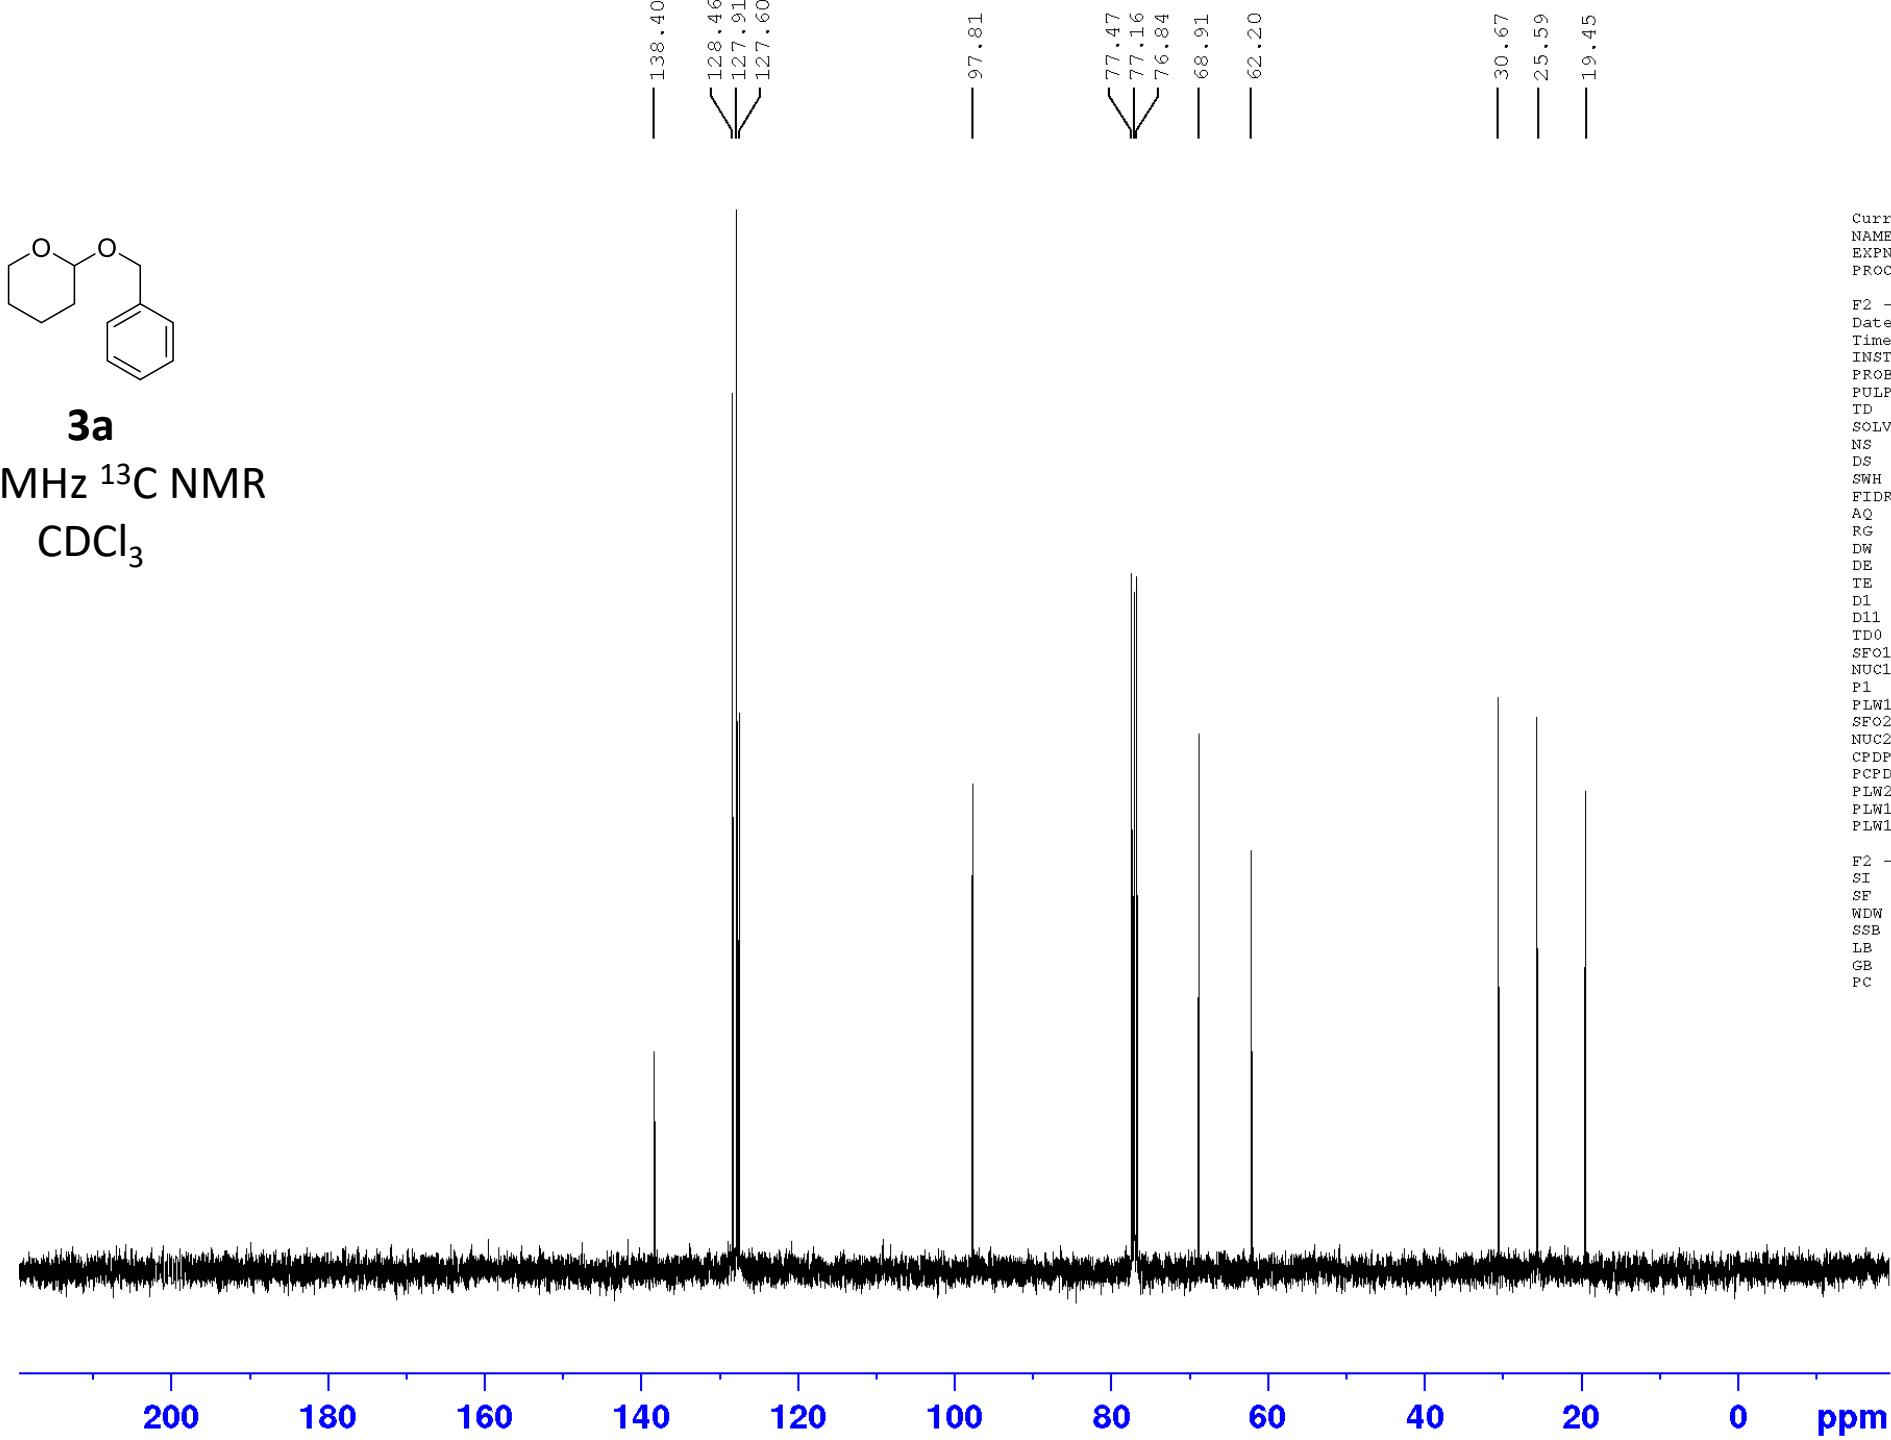

Current Data Parameters  
NAME vinn-4-127-isl-20201124  
EXPNO 2  
PROCNO 1

F2 - Acquisition Parameters  
Date\_ 20201124  
Time 12.11 h  
INSTRUM spect  
PROBHD Z820201\_0170 (  
PULPROG zgpg30  
TD 65536  
SOLVENT CDCl3  
NS 60  
DS 4  
SWH 24038.461 Hz  
FIDRES 0.733596 Hz  
AQ 1.3631488 sec  
RG 203  
DW 20.800 usec  
DE 6.50 usec  
TE 295.7 K  
D1 2.0000000 sec  
D11 0.03000000 sec  
TD0 1  
SFO1 100.6228298 MHz  
NUC1 13C  
P1 28.00 usec  
PLW1 14.80000019 W  
SFO2 400.1316005 MHz  
NUC2 1H  
CPDPRG[2] waltz16  
PCPD2 90.00 usec  
PLW2 13.17000008 W  
PLW12 0.07408100 W  
PLW13 0.03726200 W

F2 - Processing parameters  
SI 32768  
SF 100.6127610 MHz  
WDW EM  
SSB 0  
LB 1.00 Hz  
GB 0  
PC 1.40

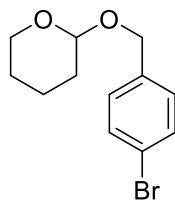

**3b**

500 MHz <sup>1</sup>H NMR  
CDCl<sub>3</sub>

7.471  
7.467  
7.458  
7.454  
7.260  
7.247  
7.230

4.739  
4.715  
4.693  
4.686  
4.679  
4.463  
4.439  
3.914  
3.868  
3.563  
3.520

1.892  
1.818  
1.767  
1.697  
1.673  
1.506

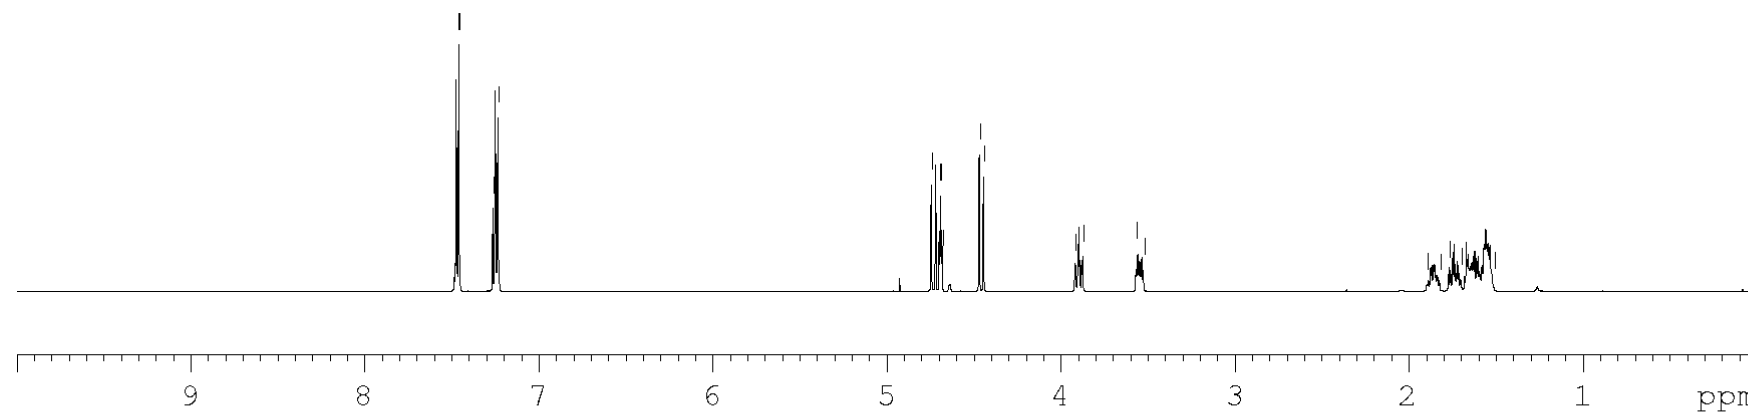

1.958  
2.176

0.981  
0.941  
0.978

1.000  
1.000

1.023  
1.188  
4.097

```

Current Data Parameters
NAME      vinn-4-137-1-1alt-20201207
EXPNO     1
PROCNO    1

F2 - Acquisition Parameters
Date_     20201207
Time      18.39 h
INSTRUM   spect
PROBHD    E119470_0283 (
PULPROG   zg30
TD         65536
SOLVENT   CDCl3
NS         16
DS         2
SWH        10000.000 Hz
FIDRES     0.305176 Hz
AQ         3.2767999 sec
RG         30.85
DW         50.000 usec
DE         6.50 usec
TE         295.1 K
D1         1.00000000 sec
TD0        1
SFO1      500.1330883 MHz
NUC1       1H
F1         10.91 usec
PLW1       25.00000000 W

F2 - Processing parameters
SI         65536
SF         500.1300122 MHz
WDW        EM
SSB        0
LB         0.30 Hz
GB         0
PC         1.00

```

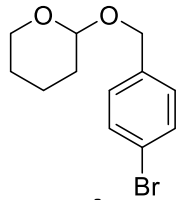

**3b**

125 MHz <sup>13</sup>C NMR  
CDCl<sub>3</sub>

— 137.438  
 — 131.546  
 — 129.524  
 — 121.448  
 — 97.900  
 — 77.411  
 — 77.156  
 — 76.903  
 — 68.149  
 — 62.271  
 — 30.615  
 — 25.524  
 — 19.419

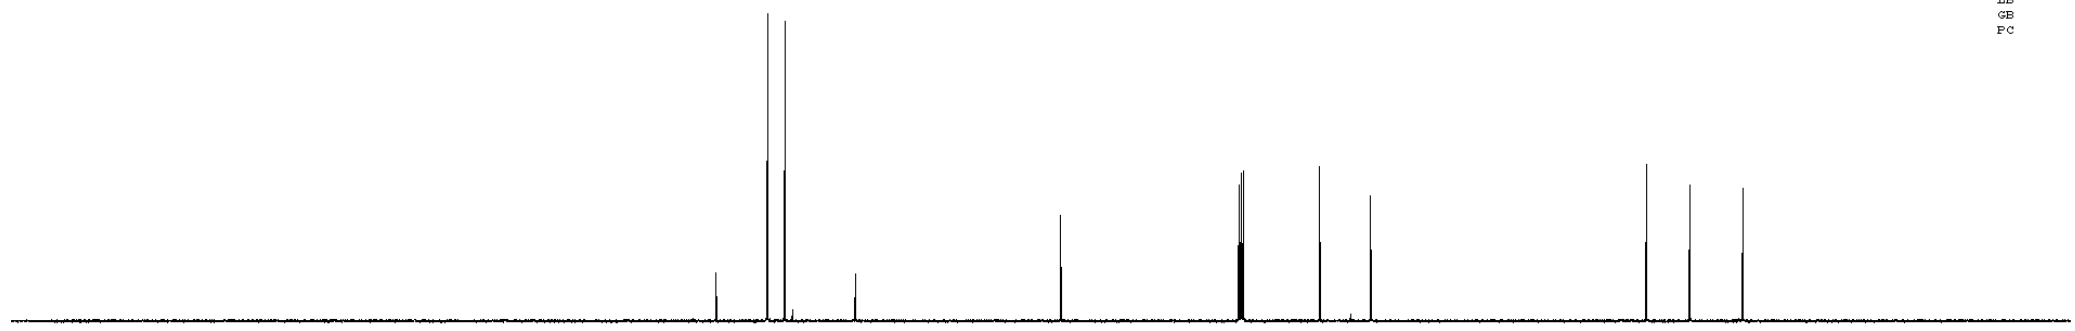

```

Current Data Parameters
NAME      vinn-4-137-1-ialt-20201207
EKFN0     2
PROCNO    1

F2 - Acquisition Parameters
Date_     20201207
Time      18.45 h
INSTRUM   spect
PROBHD    E119470_0283 {
FULPROG   zgpg30
TD         65536
SOLVENT   CDCl3
NS         100
DS         4
SWH       29761.904 Hz
FIDRES    0.908261 Hz
AQ         1.1010048 sec
RG         206.72
DW         16.800 usec
DE         6.50 usec
TE         295.1 K
D1         2.00000000 sec
D11        0.03000000 sec
TD0        1
SFO1      125.7703643 MHz
NUC1       13c
F1         9.75 usec
PLW1      94.00000000 W
SFO2      500.1320005 MHz
NUC2       1H
CPDPRG[2] waltz16
PCPD2     80.00 usec
PLW2      25.00000000 W
PLW12     0.46495000 W
PLW13     0.23387000 W

F2 - Processing parameters
SI         32768
SF         125.7577782 MHz
WDW        EM
SSB        0
LB         1.00 Hz
GB         0
PC         1.40
  
```

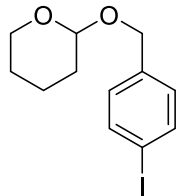

**3c**

500 MHz <sup>1</sup>H NMR

CDCl<sub>3</sub>

7.672  
7.656

7.118  
7.102

4.728  
4.703  
4.688  
4.681  
4.674  
4.452  
4.427  
3.908  
3.863  
3.559  
3.516

1.888  
1.814  
1.763  
1.703  
1.670  
1.504

```

Current Data Parameters
NAME      vinn-4-137-2-isl-20201207
EXPNO     1
PROCNO    1

F2 - Acquisition Parameters
Date_     20201207
Time      18.49 h
INSTRUM   spect
PROBHD    zg30
PULPROG   zg30
TD         65536
SOLVENT   CDCl3
NS         16
DS         2
SWH        10000.000 Hz
FIDRES     0.305176 Hz
AQ         3.2767999 sec
RG         30.85
DW         50.000 usec
DE         6.50 usec
TE         295.1 K
D1         1.00000000 sec
TD0        1
SFO1       500.1330883 MHz
NUC1       1H
P1         10.91 usec
PLW1       25.00000000 W

F2 - Processing parameters
SI         65536
SF         500.1300122 MHz
WDW        EM
SSB        0
LB         0.30 Hz
GB         0
PC         1.00
  
```

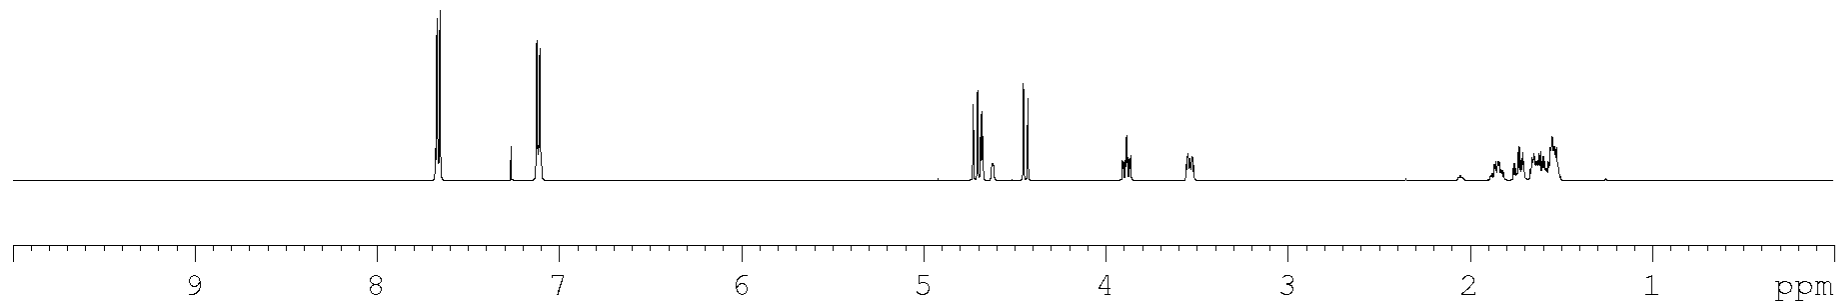

2.27

2.31

1.00  
0.97  
1.00

1.01  
1.02

1.04  
1.22  
4.15

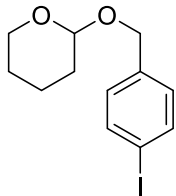

**3c**

125 MHz <sup>13</sup>C NMR

CDCl<sub>3</sub>

138.089  
137.511  
129.759  
128.861

97.884

77.412  
77.157  
76.904  
68.201  
62.258

30.601  
25.512  
19.399

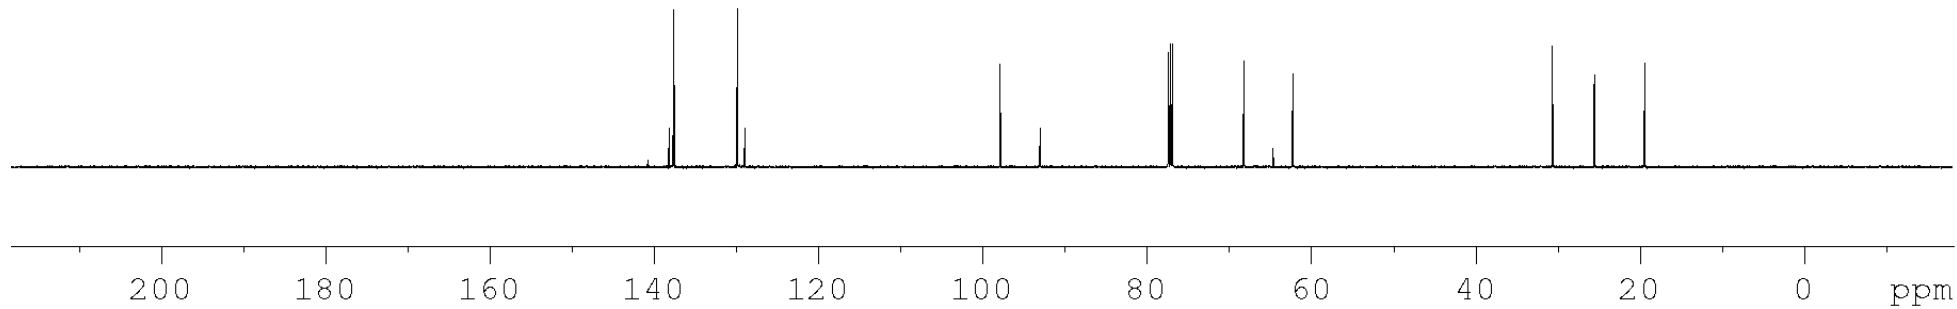

```
Current Data Parameters
NAME vinn-4-137-2-isl-20201207
EXPNO 2
PROCNO 1

F2 - Acquisition Parameters
Date_ 20201207
Time 18.55 h
INSTRUM spect
PROBHD E119470_0283 (
PULPROG zgpg30
TD 65536
SOLVENT CDCl3
NS 100
DS 4
SWH 29761.904 Hz
FIDRES 0.908261 Hz
AQ 1.1010048 sec
RG 206.72
DW 16.800 usec
DE 6.50 usec
TE 295.2 K
D1 2.00000000 sec
D11 0.03000000 sec
TD0 1
SF01 125.7703643 MHz
NUC1 13c
P1 9.75 usec
PLW1 94.00000000 W
SFO2 500.1320005 MHz
NUC2 1H
CPDPRG[2] waltz16
PCPD2 80.00 usec
PLW2 25.00000000 W
PLW12 0.46495000 W
PLW13 0.23387000 W

F2 - Processing parameters
SI 32768
SF 125.7577798 MHz
---
```

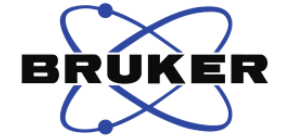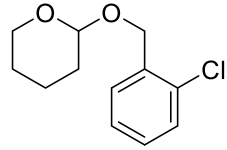

**3d**

500 MHz <sup>1</sup>H NMR

CDCl<sub>3</sub>

7.5254  
7.5104  
7.3513  
7.3357  
7.2751  
7.1936

4.8737  
4.8473  
4.7698  
4.6247  
4.5983

3.9434  
3.9223  
3.9034  
3.5748  
3.5525

1.9206  
1.8607  
1.7962  
1.6865  
1.6340  
1.6275  
1.5478

Current Data Parameters  
NAME vinn-4-137-16-islt-2020121  
EXPNO 1  
PROCNO 1

F2 - Acquisition Parameters  
Date\_ 20201211  
Time 6.34 h  
INSTRUM spect  
PROBHD z119470\_0283 {  
PULPROG zg30  
TD 65536  
SOLVENT cdcl3  
NS 16  
DS 2  
SWH 10000.000 Hz  
FIDRES 0.305176 Hz  
AQ 3.2767999 sec  
RG 30.85  
DW 50.000 usec  
DE 6.50 usec  
TE 295.1 K  
D1 1.0000000 sec  
TD0 1  
SFO1 500.1330883 MHz  
NUC1 1H  
P1 10.91 usec  
PLW1 25.0000000 W

F2 - Processing parameters  
SI 65536  
SF 500.1300150 MHz  
WDW EM  
SSB 0  
LB 0.30 Hz  
GB 0  
PC 1.00

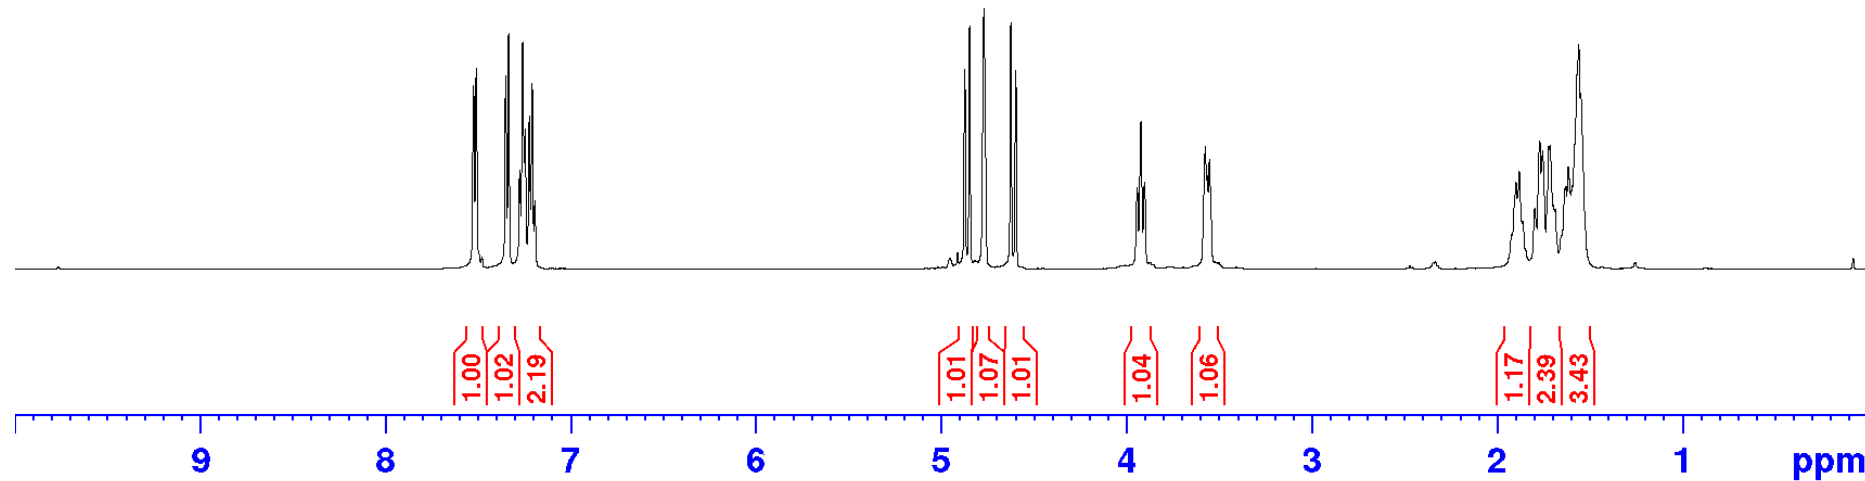



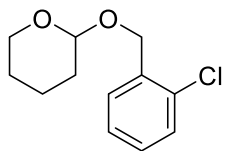

**3d**

125 MHz <sup>13</sup>C NMR  
CDCl<sub>3</sub>

136.28  
133.00  
129.30  
129.04  
128.60  
126.81

98.44

77.41  
77.15  
76.90

66.36  
62.21

30.60  
25.54  
19.40

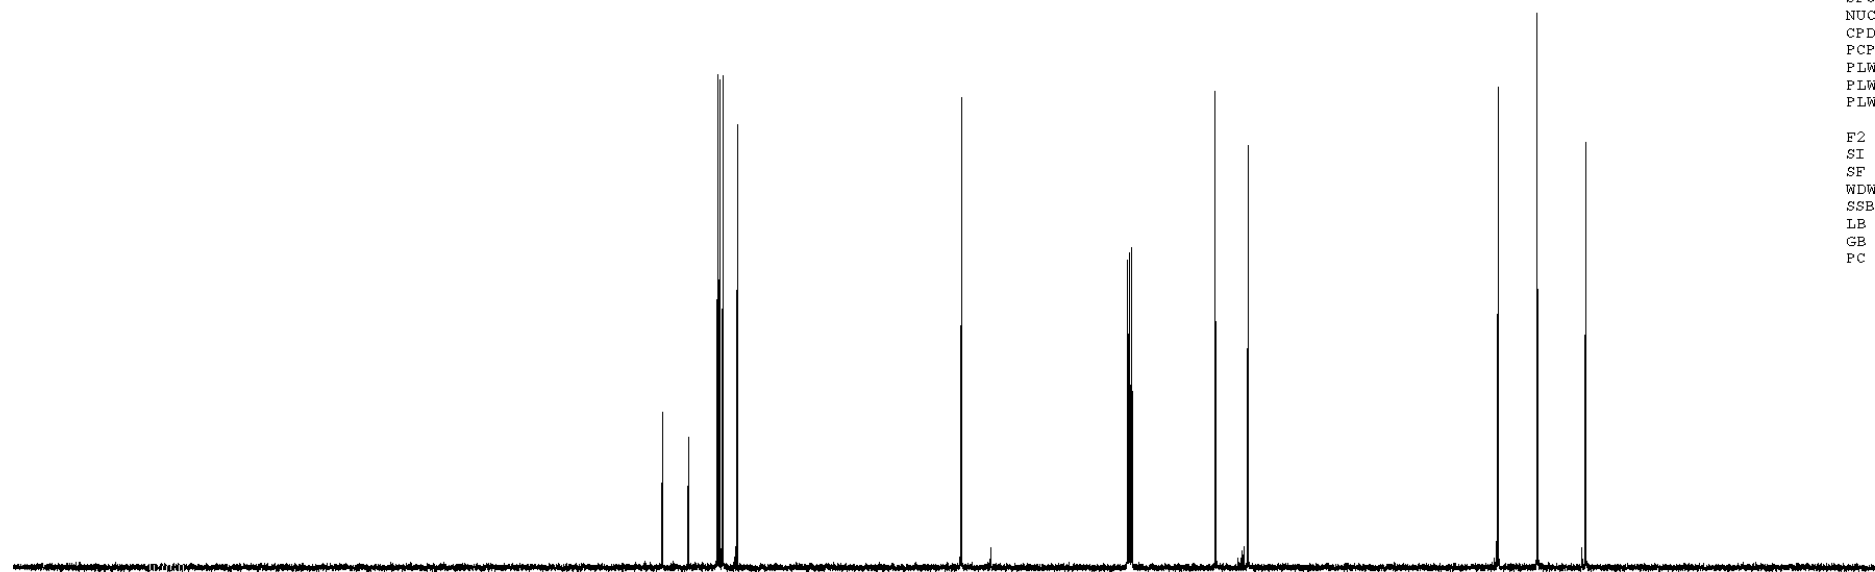

Current Data Parameters  
NAME vinn-4-137-16-islt-20201210  
EXPNO 2  
PROCNO 1

F2 - Acquisition Parameters  
Date\_ 20201211  
Time 6.39 h  
INSTRUM spect  
PROBHD Z119470\_0283 (  
PULPROG zgpg30  
TD 65536  
SOLVENT CDCl3  
NS 100  
DS 4  
SWH 29761.904 Hz  
FIDRES 0.908261 Hz  
AQ 1.1010048 sec  
RG 206.72  
DW 16.800 usec  
DE 6.50 usec  
TE 295.1 K  
D1 2.0000000 sec  
D11 0.03000000 sec  
TD0 1  
SFO1 125.7703643 MHz  
NUC1 13C  
P1 9.75 usec  
PLW1 94.0000000 W  
SFO2 500.1320005 MHz  
NUC2 1H  
CPDPRG[2] waltz16  
PCPD2 80.00 usec  
PLW2 25.0000000 W  
PLW12 0.46495000 W  
PLW13 0.23387000 W

F2 - Processing parameters  
SI 32768  
SF 125.7577804 MHz  
WDW EM  
SSB 0  
LB 1.00 Hz  
GB 0  
PC 1.40

200 180 160 140 120 100 80 60 40 20 0 ppm

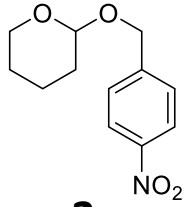

**3e**

500 MHz <sup>1</sup>H NMR

CDCl<sub>3</sub>

8.198  
8.180

7.528  
7.510

4.887

4.860

4.729

4.721

4.714

4.609

4.582

3.895

3.849

3.572

3.529

1.915

1.827

1.801

1.741

1.712

1.529

```

Current Data Parameters
NAME      vinn-4-137-4-ialt-20201207
EXPNO    1
PROCNO    1

F2 - Acquisition Parameters
Date_     20201207
Time      19.08 h
INSTRUM   spect
PROBHD    z119470_0283 {
FULPROG   zg30
TD         65536
SOLVENT   cdcl3
NS         16
DS         2
SWH        10000.000 Hz
FIDRES     0.305176 Hz
AQ         3.2767999 sec
RG         50.6
DW         50.000 usec
DE         6.50 usec
TE         295.2 K
D1         1.00000000 sec
TD0        1
SFO1      500.1330883 MHz
NUC1       1H
P1         10.91 usec
PLW1       25.00000000 W

F2 - Processing parameters
SI         65536
SF         500.1300122 MHz
WDW        EM
SSB        0
LB         0.30 Hz
GB         0
PC         1.00
  
```

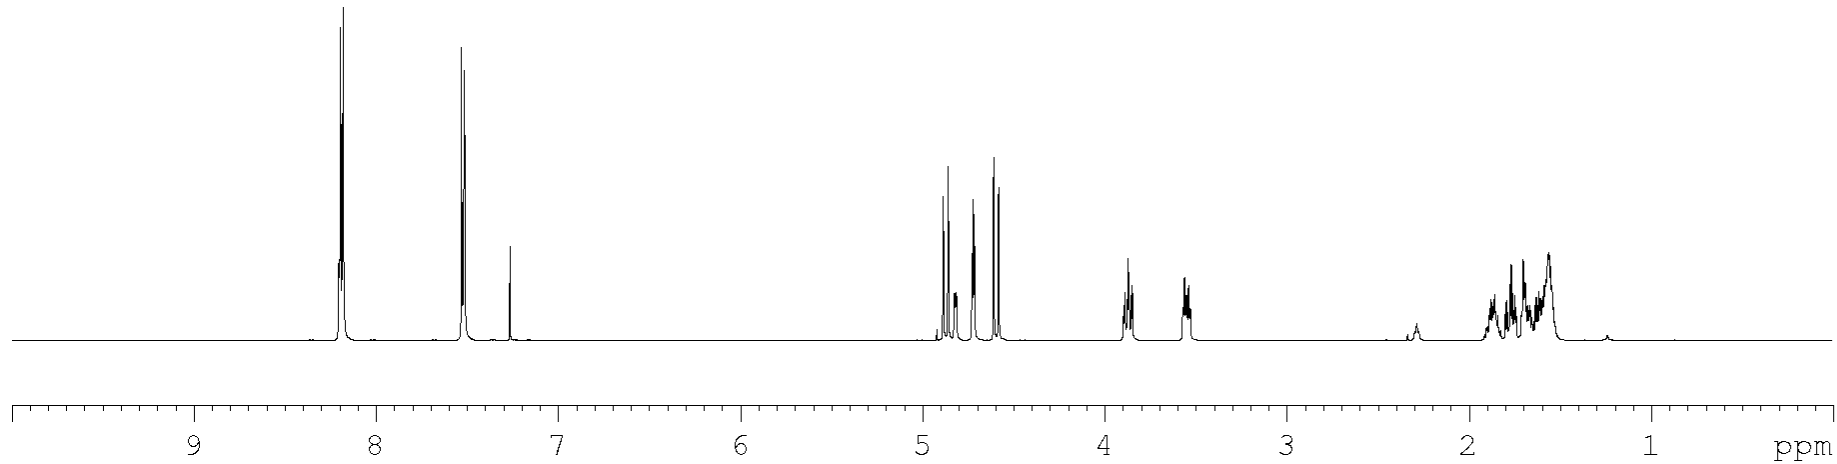

2.32

2.37

0.99

0.96

1.00

1.01

1.01

1.03

1.04

4.30

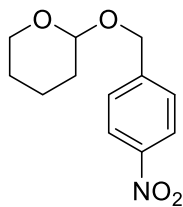

**3e**

125 MHz <sup>13</sup>C NMR  
CDCl<sub>3</sub>

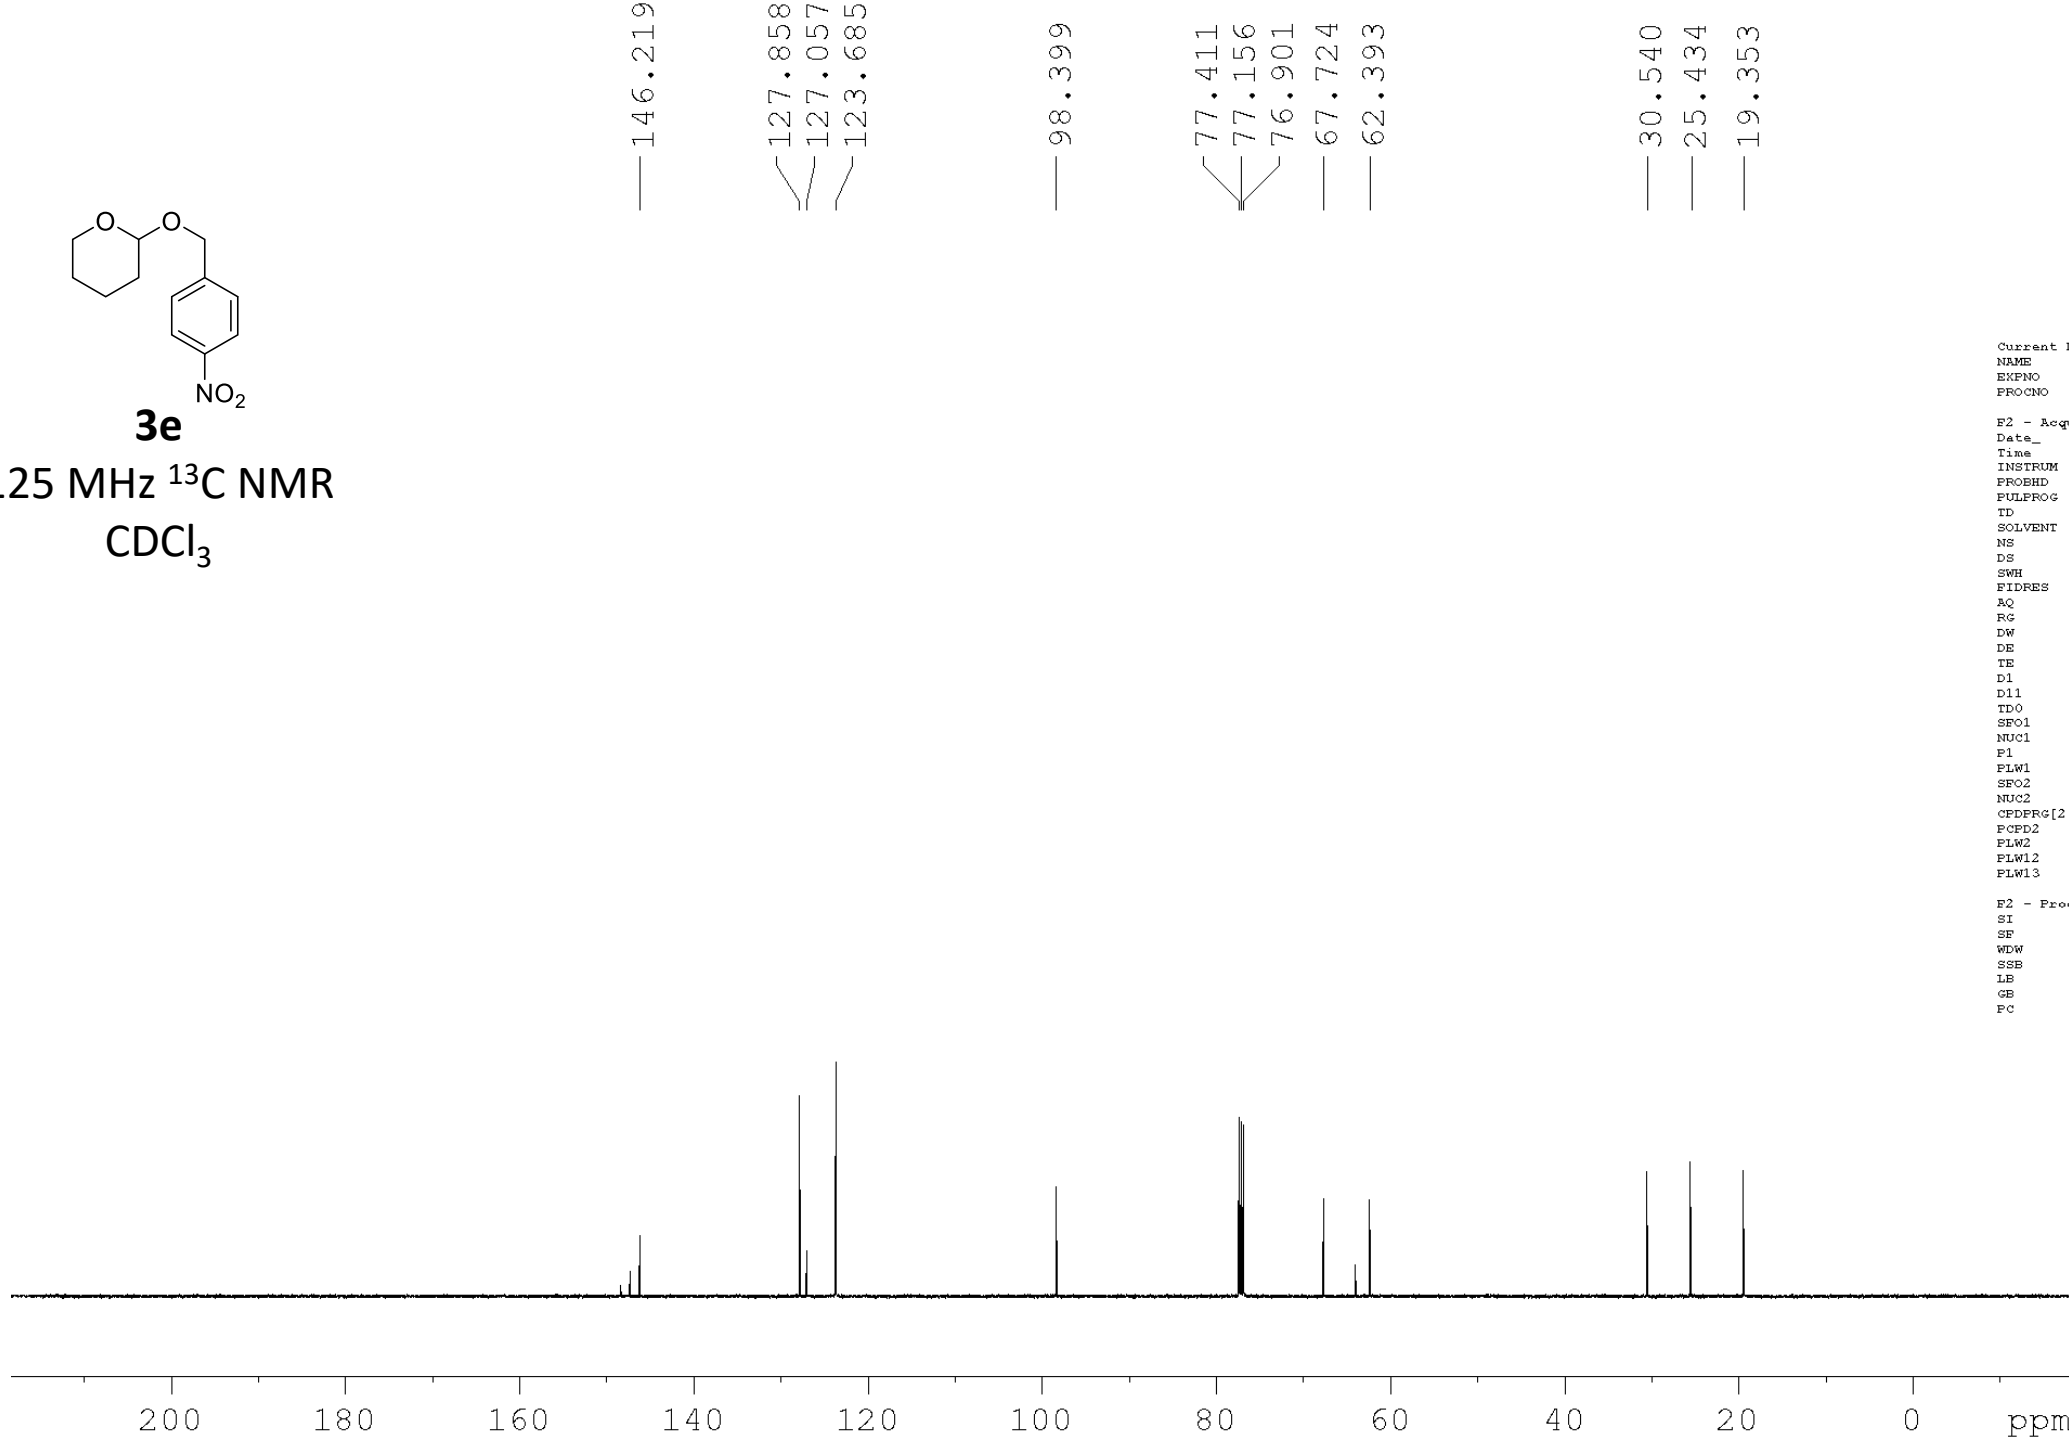

Current Data Parameters  
NAME vinn-4-137-4-ialt-20201207  
EKFNO 2  
PROCNO 1

F2 - Acquisition Parameters  
Date\_ 20201207  
Time 19.14 h  
INSTRUM spect  
PROBHD E119470\_0283 {  
PULPROG zgpg30  
TD 65536  
SOLVENT cdcl3  
NS 100  
DS 4  
SWH 29761.904 Hz  
FIDRES 0.908261 Hz  
AQ 1.1010048 sec  
RG 206.72  
DW 16.800 usec  
DE 6.50 usec  
TE 295.1 K  
D1 2.00000000 sec  
D11 0.03000000 sec  
TD0 1  
SFO1 125.7703643 MHz  
NUC1 13c  
F1 9.75 usec  
PLW1 94.00000000 W  
SFO2 500.1320005 MHz  
NUC2 1H  
CPDPRG[2] waltz16  
PCPD2 80.00 usec  
PLW2 25.00000000 W  
PLW12 0.46495000 W  
PLW13 0.23387000 W

F2 - Processing parameters  
SI 32768  
SF 125.7577777 MHz  
WDW EM  
SSB 0  
LB 1.00 Hz  
GB 0  
PC 1.40

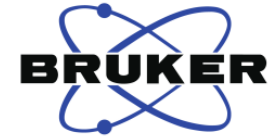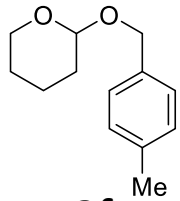

**3f**

500 MHz <sup>1</sup>H NMR

CDCl<sub>3</sub>

7.2823  
7.2664  
7.1763  
7.1607

4.7726  
4.7490  
4.7185  
4.7113  
4.7042  
4.4916  
4.4680  
3.9632  
3.9171  
3.5806  
3.5380

2.3573  
1.9092  
1.8379  
1.7718  
1.7118  
1.6830  
1.5055

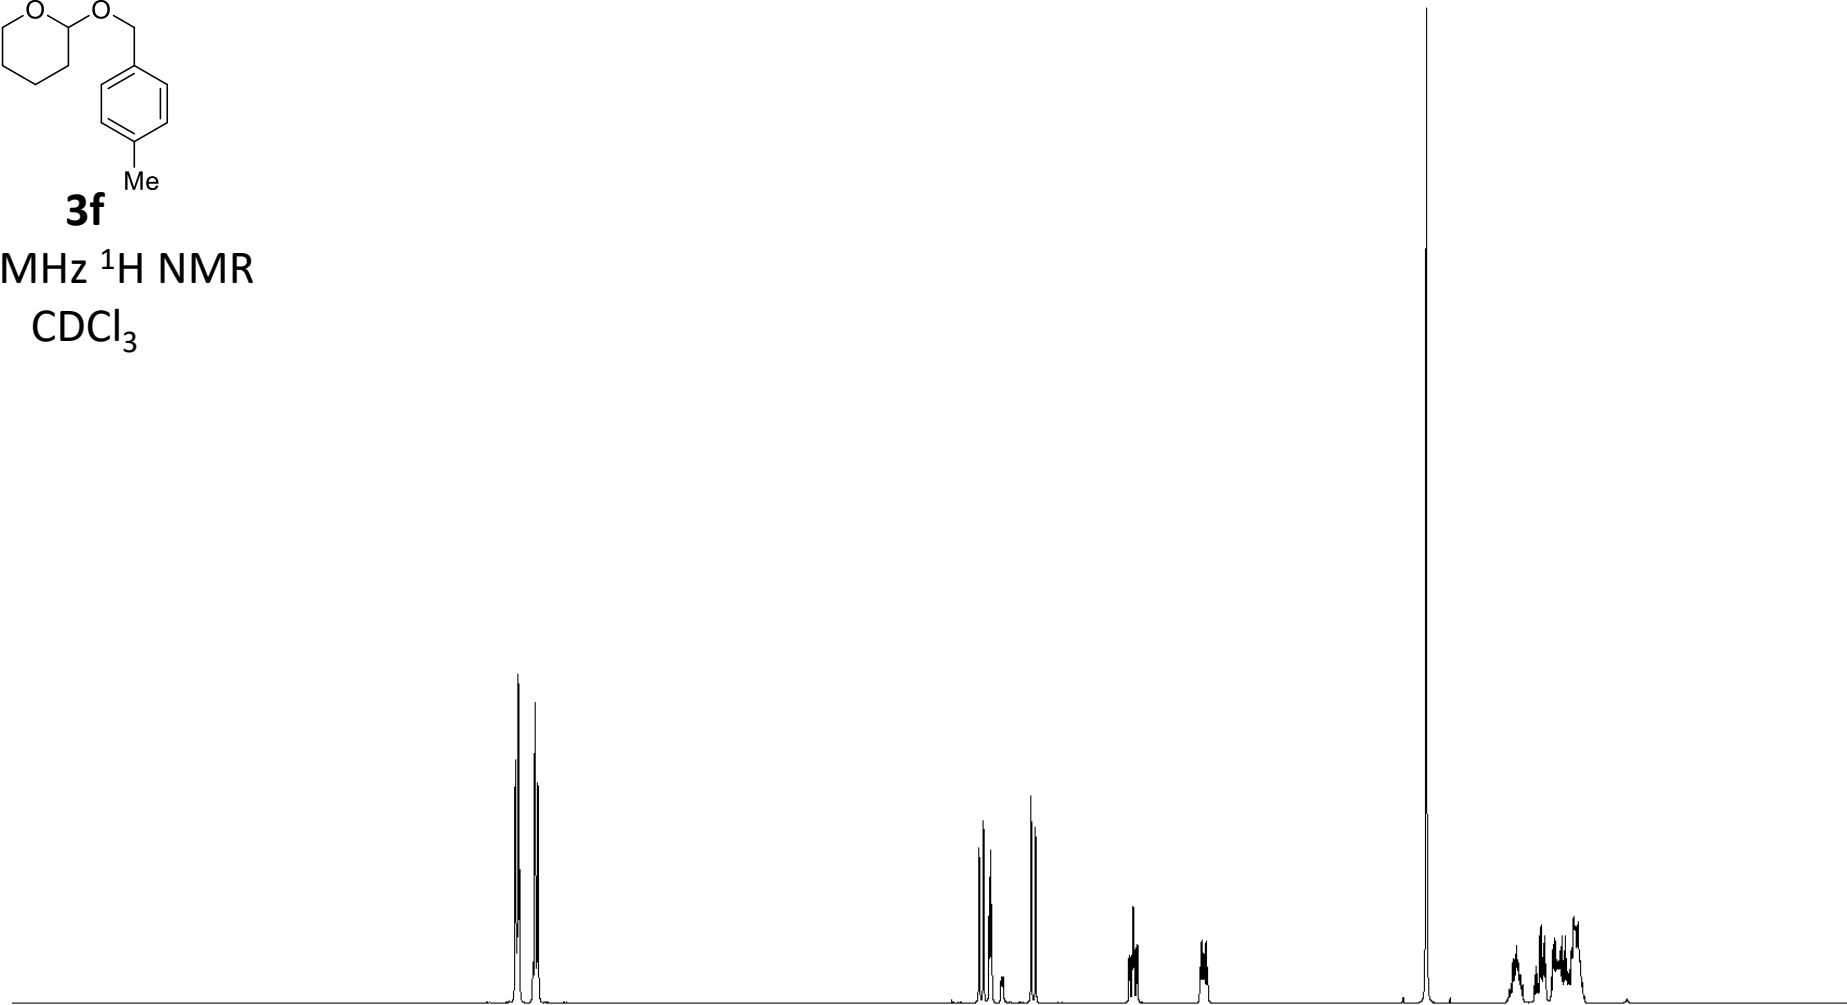

2.23  
2.14

0.99  
0.96  
0.99

1.00

1.01

3.35

1.12  
1.20  
4.11

Current Data Parameters  
NAME vinn-4-137-3-ialt-20201207  
EXPNO 1  
PROCNO 1

F2 - Acquisition Parameters  
Date\_ 20201207  
Time 18.58 h  
INSTRUM spect  
PROBHD Z119470\_0283 (   
PULPROG zg30  
TD 65536  
SOLVENT CDCl3  
NS 16  
DS 2  
SWH 10000.000 Hz  
FIDRES 0.305176 Hz  
AQ 3.2767999 sec  
RG 30.85  
DW 50.000 usec  
DE 6.50 usec  
TE 295.1 K  
D1 1.00000000 sec  
TD0 1  
SF01 500.1330883 MHz  
NUC1 1H  
F1 10.91 usec  
PLW1 25.00000000 W

F2 - Processing parameters  
SI 65536  
SF 500.1300121 MHz  
WDW EM  
SSB 0  
LB 0.30 Hz  
GB 0  
PC 1.00

9 8 7 6 5 4 3 2 1 ppm

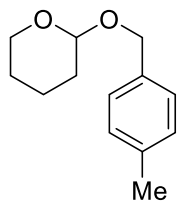

**3f**

125 MHz <sup>13</sup>C NMR  
CDCl<sub>3</sub>

137.30  
135.29  
129.14  
128.08  
  
97.64  
  
77.41  
77.16  
76.90  
68.76  
62.19  
  
30.69  
25.60  
21.27  
19.47

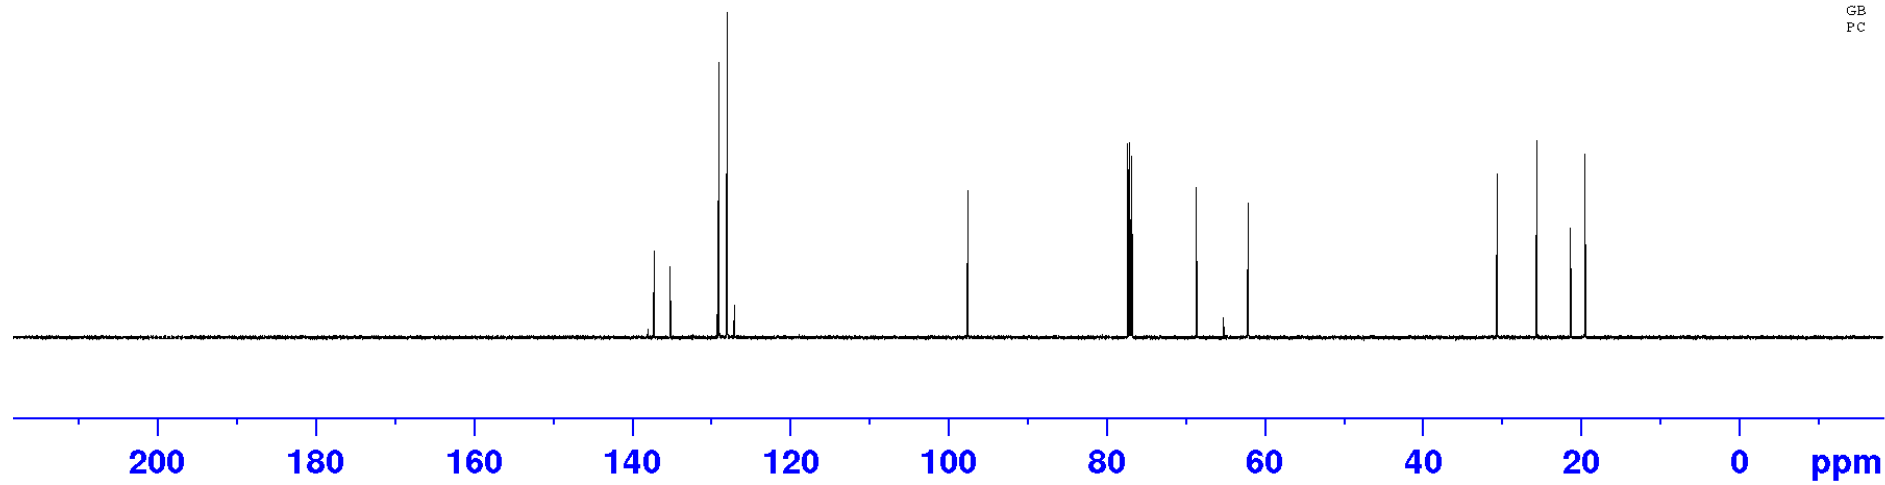

Current Data Parameters  
NAME vinn-4-137-3-islt-20201207  
EXPNO 2  
PROCNO 1

F2 - Acquisition Parameters  
Date\_ 20201207  
Time 19.04 h  
INSTRUM spect  
PROBHD Z119470\_0283 (  
PULPROG zgpg30  
TD 65536  
SOLVENT CDCl3  
NS 100  
DS 4  
SWH 29761.904 Hz  
FIDRES 0.908261 Hz  
AQ 1.1010048 sec  
RG 206.72  
DW 16.800 usec  
DE 6.50 usec  
TE 295.2 K  
D1 2.0000000 sec  
D11 0.0300000 sec  
TD0 1  
SFO1 125.7703643 MHz  
NUC1 13C  
P1 9.75 usec  
PLW1 94.0000000 W  
SFO2 500.1320005 MHz  
NUC2 1H  
CPDPRG[2] waltz16  
PCPD2 80.00 usec  
PLW2 25.0000000 W  
PLW12 0.46495000 W  
PLW13 0.23387000 W

F2 - Processing parameters  
SI 32768  
SF 125.7577796 MHz  
WDW EM  
SSB 0  
LB 1.00 Hz  
GB 0  
PC 1.40

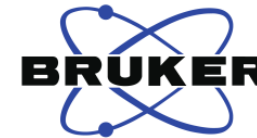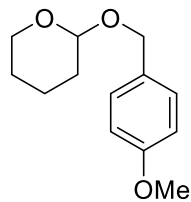

**3g**

500 MHz <sup>1</sup>H NMR  
CDCl<sub>3</sub>

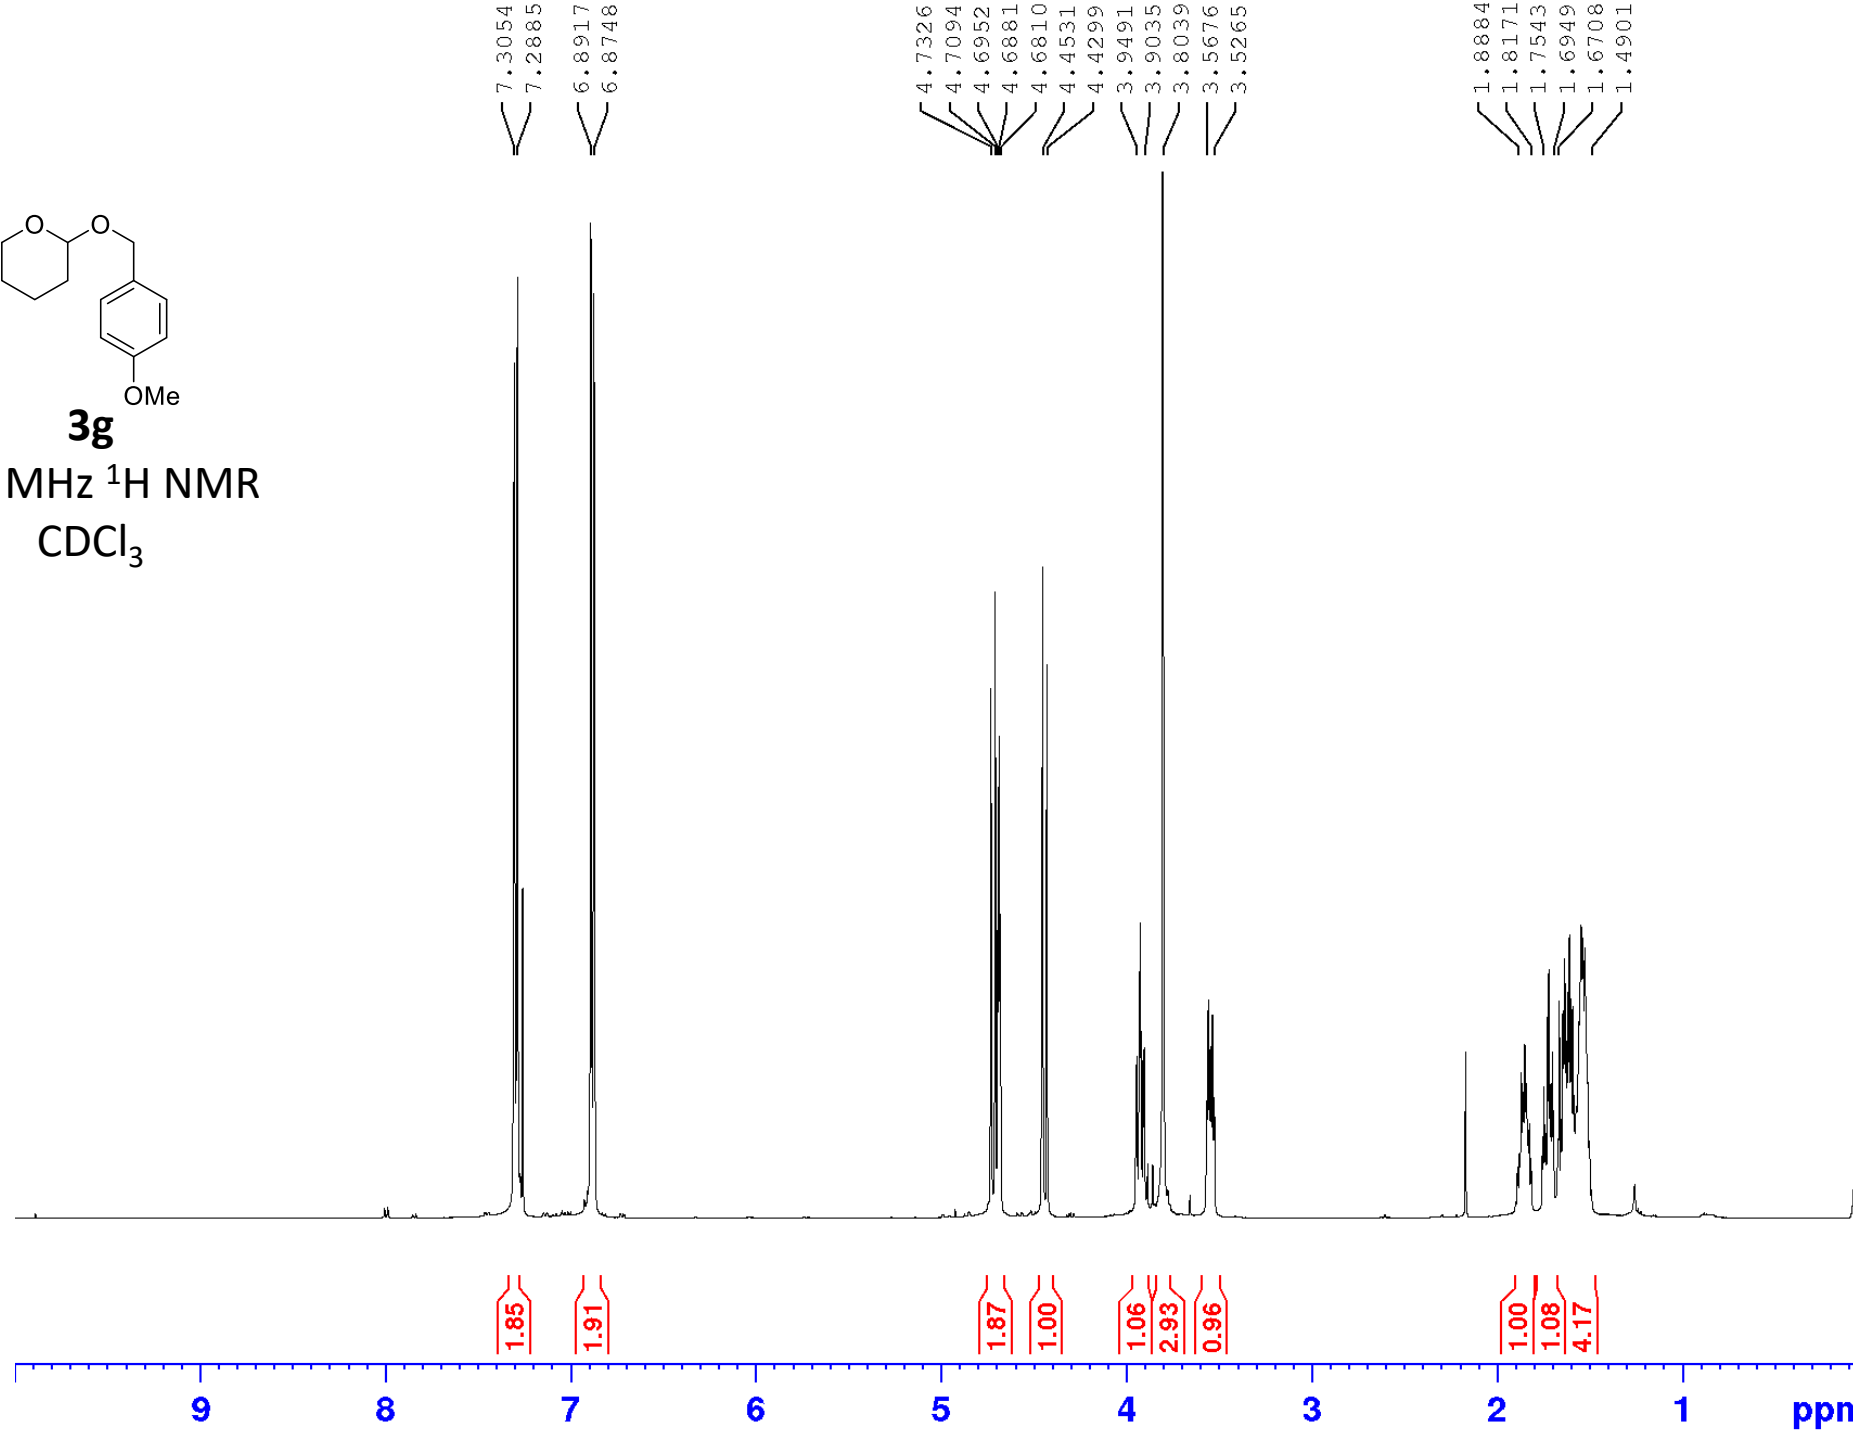

```
Current Data Parameters
NAME      vinn-4-137-7-isl2-2020012
EXPNO     1
PROCNO    1

F2 - Acquisition Parameters
Date_     20210121
Time      8.38 h
INSTRUM   spect
PROBHD    zg30
PULPROG   zg30
TD         65536
SOLVENT   cdcl3
NS         16
DS         2
SWH        10000.000 Hz
FIDRES     0.305176 Hz
AQ         3.2767999 sec
RG         56.83
DW         50.000 usec
DE         6.50 usec
TE         295.2 K
D1         1.00000000 sec
TD0        1
SF01       500.1330883 MHz
NUC1       1H
F1         10.91 usec
PLW1       25.00000000 W

F2 - Processing parameters
SI         65536
SF         500.1300125 MHz
WDW        EM
SSB        0
LB         0.30 Hz
GB         0
PC         1.00
```

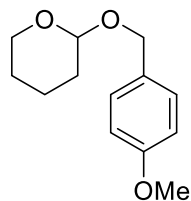

**3g**

125 MHz <sup>13</sup>C NMR  
CDCl<sub>3</sub>

— 159.24  
 130.42  
 129.62  
 — 113.88  
 — 97.58  
 77.41  
 77.15  
 76.90  
 — 68.60  
 — 62.27  
 — 55.39  
 — 30.71  
 — 25.61  
 — 19.53

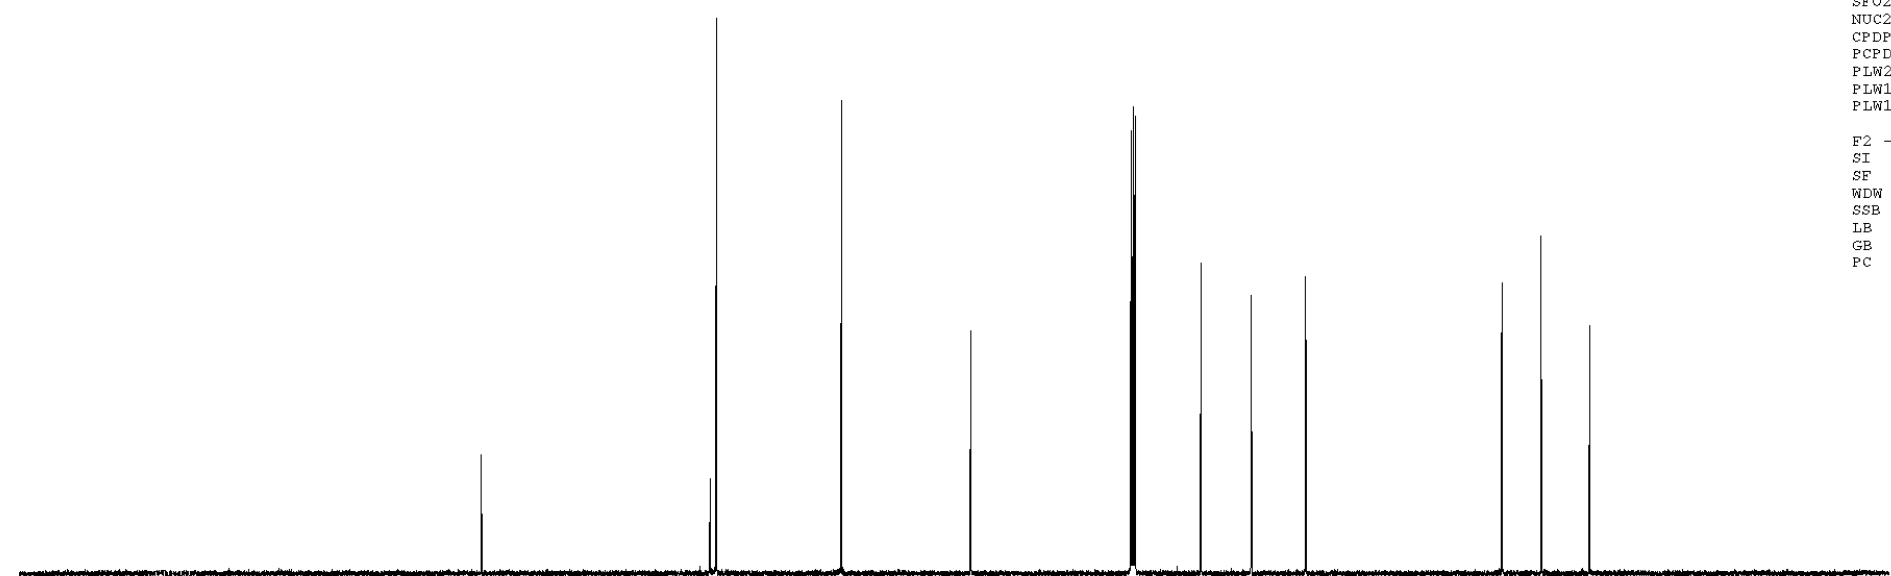

Current Data Parameters  
 NAME vinn-4-137-7-islt2-20200120  
 EXPNO 2  
 PROCNO 1

F2 - Acquisition Parameters  
 Date\_ 20210121  
 Time 8.52 h  
 INSTRUM spect  
 PROBHD Z119470\_0283 (  
 PULPROG zgpg30  
 TD 65536  
 SOLVENT CDCl3  
 NS 256  
 DS 4  
 SWH 29761.904 Hz  
 FIDRES 0.908261 Hz  
 AQ 1.1010048 sec  
 RG 206.72  
 DW 16.800 usec  
 DE 6.50 usec  
 TE 295.2 K  
 D1 2.0000000 sec  
 D11 0.0300000 sec  
 TD0 1  
 SFO1 125.7703643 MHz  
 NUC1 13C  
 P1 9.75 usec  
 PLW1 94.0000000 W  
 SFO2 500.1320005 MHz  
 NUC2 1H  
 CPDPRG[2] waltz16  
 PCPD2 80.00 usec  
 PLW2 25.0000000 W  
 PLW12 0.46495000 W  
 PLW13 0.23387000 W

F2 - Processing parameters  
 SI 32768  
 SF 125.7577765 MHz  
 WDW EM  
 SSB 0  
 LB 1.00 Hz  
 GB 0  
 PC 1.40

200 180 160 140 120 100 80 60 40 20 0 ppm

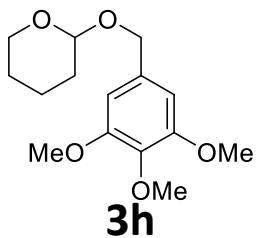

500 MHz <sup>1</sup>H NMR  
CDCl<sub>3</sub>

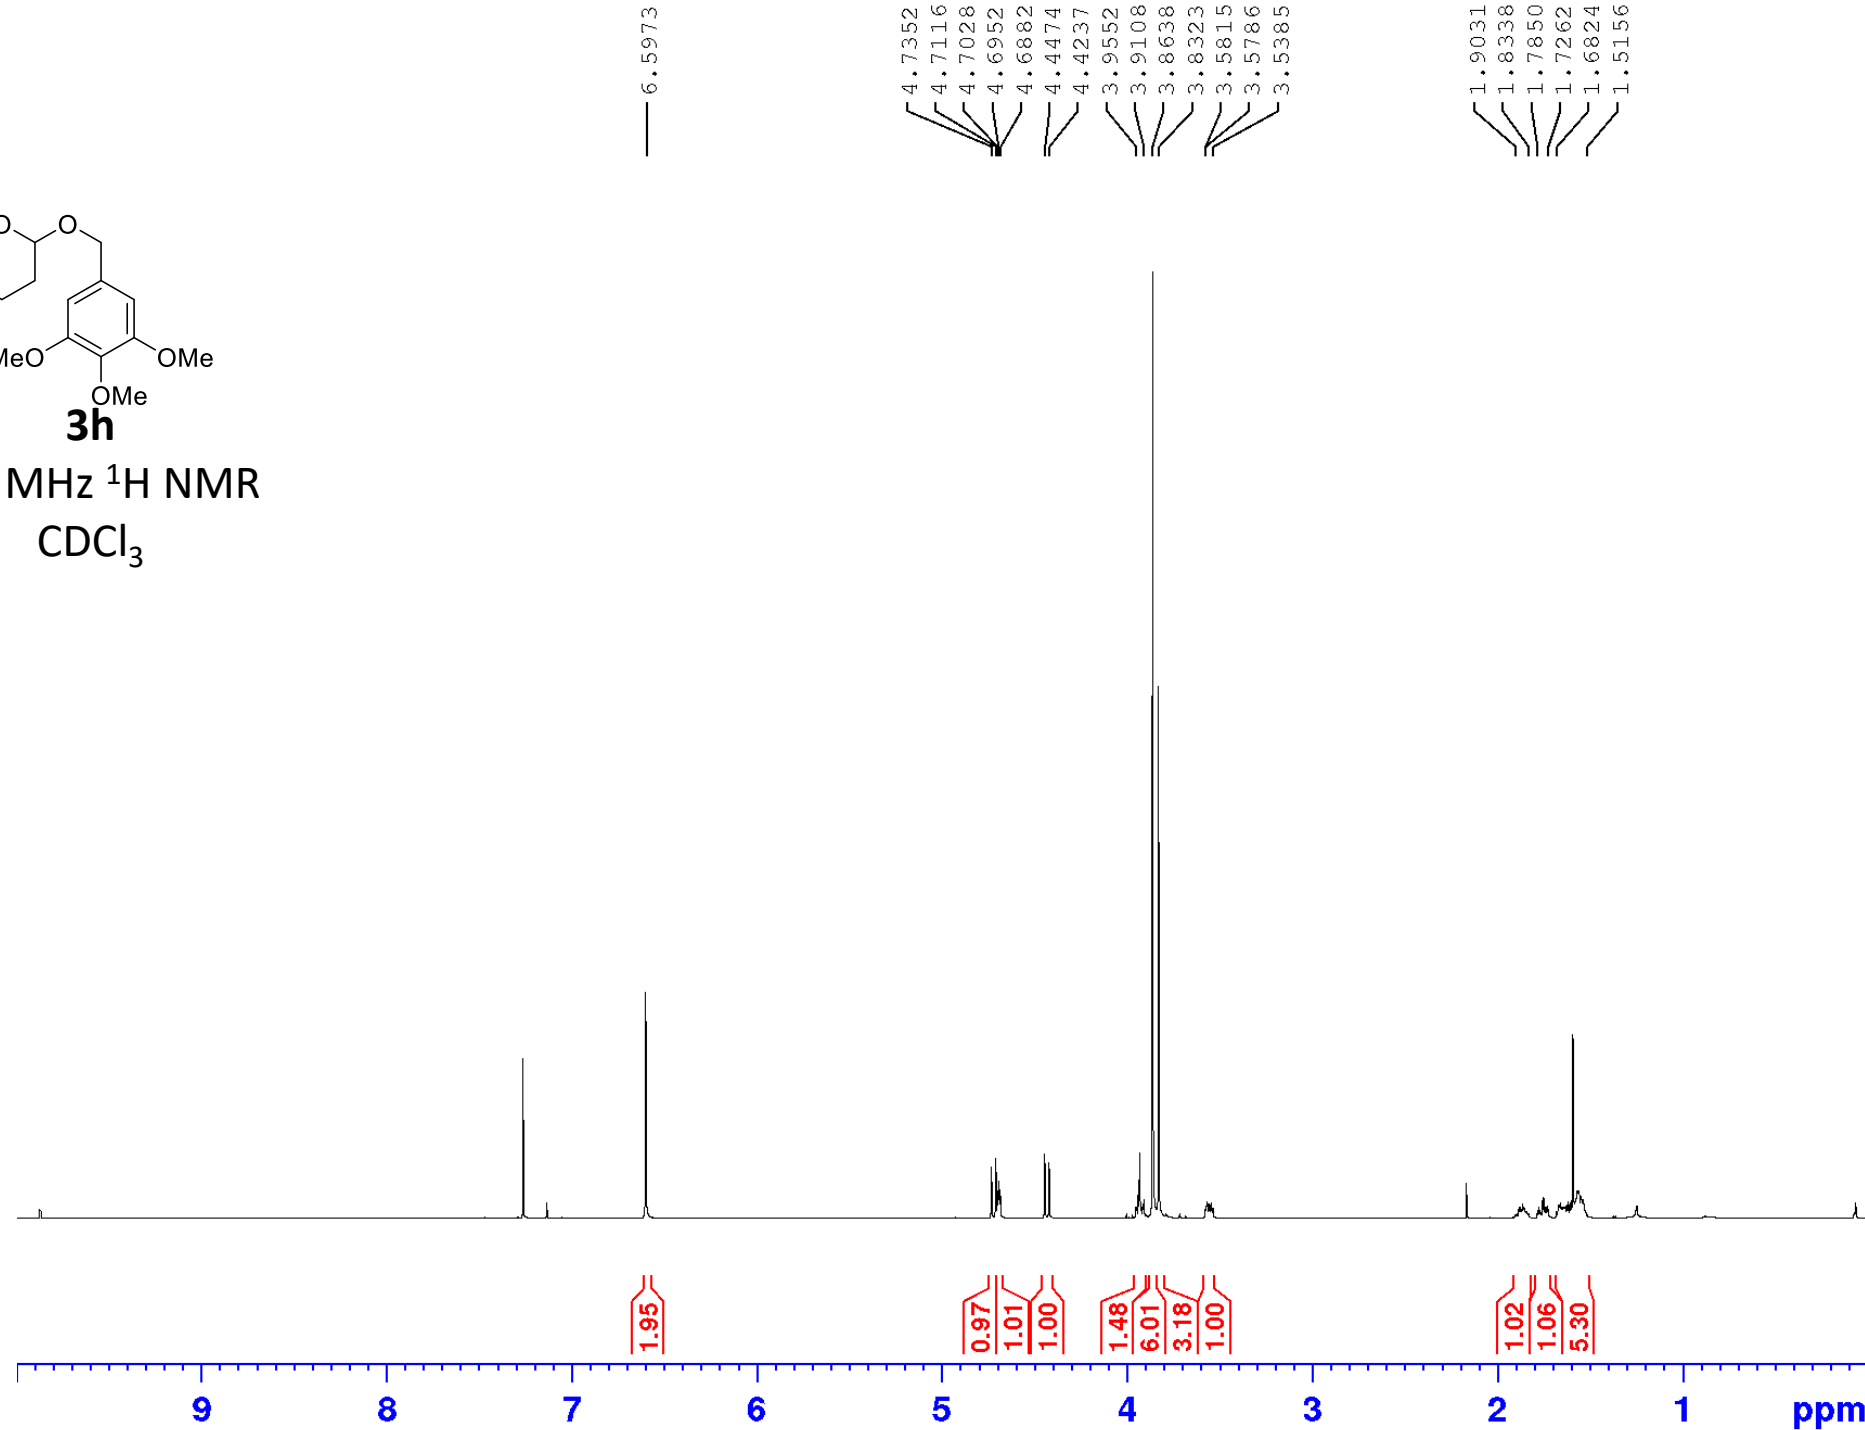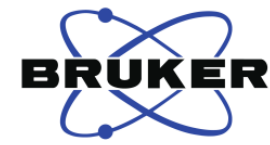

```

Current Data Parameters
NAME vinn-4-137-6-isl2-2020012
EXPNO 1
PROCNO 1

F2 - Acquisition Parameters
Date_ 20210121
Time 8.20 h
INSTRUM spect
PROBHD E119470_0283 {
PULPROG zg30
TD 65536
SOLVENT cdcl3
NS 16
DS 2
SWH 10000.000 Hz
FIDRES 0.305176 Hz
AQ 3.2767999 sec
RG 102.6
DW 50.000 usec
DE 6.50 usec
TE 295.1 K
D1 1.00000000 sec
TD0 1
SF01 500.1330883 MHz
NUC1 1H
P1 10.91 usec
PLW1 25.00000000 W

F2 - Processing parameters
SI 65536
SF 500.1300123 MHz
WDW EM
SSB 0
LB 0.30 Hz
GB 0
PC 1.00

```





125 MHz <sup>13</sup>C NMR  
CDCl<sub>3</sub>

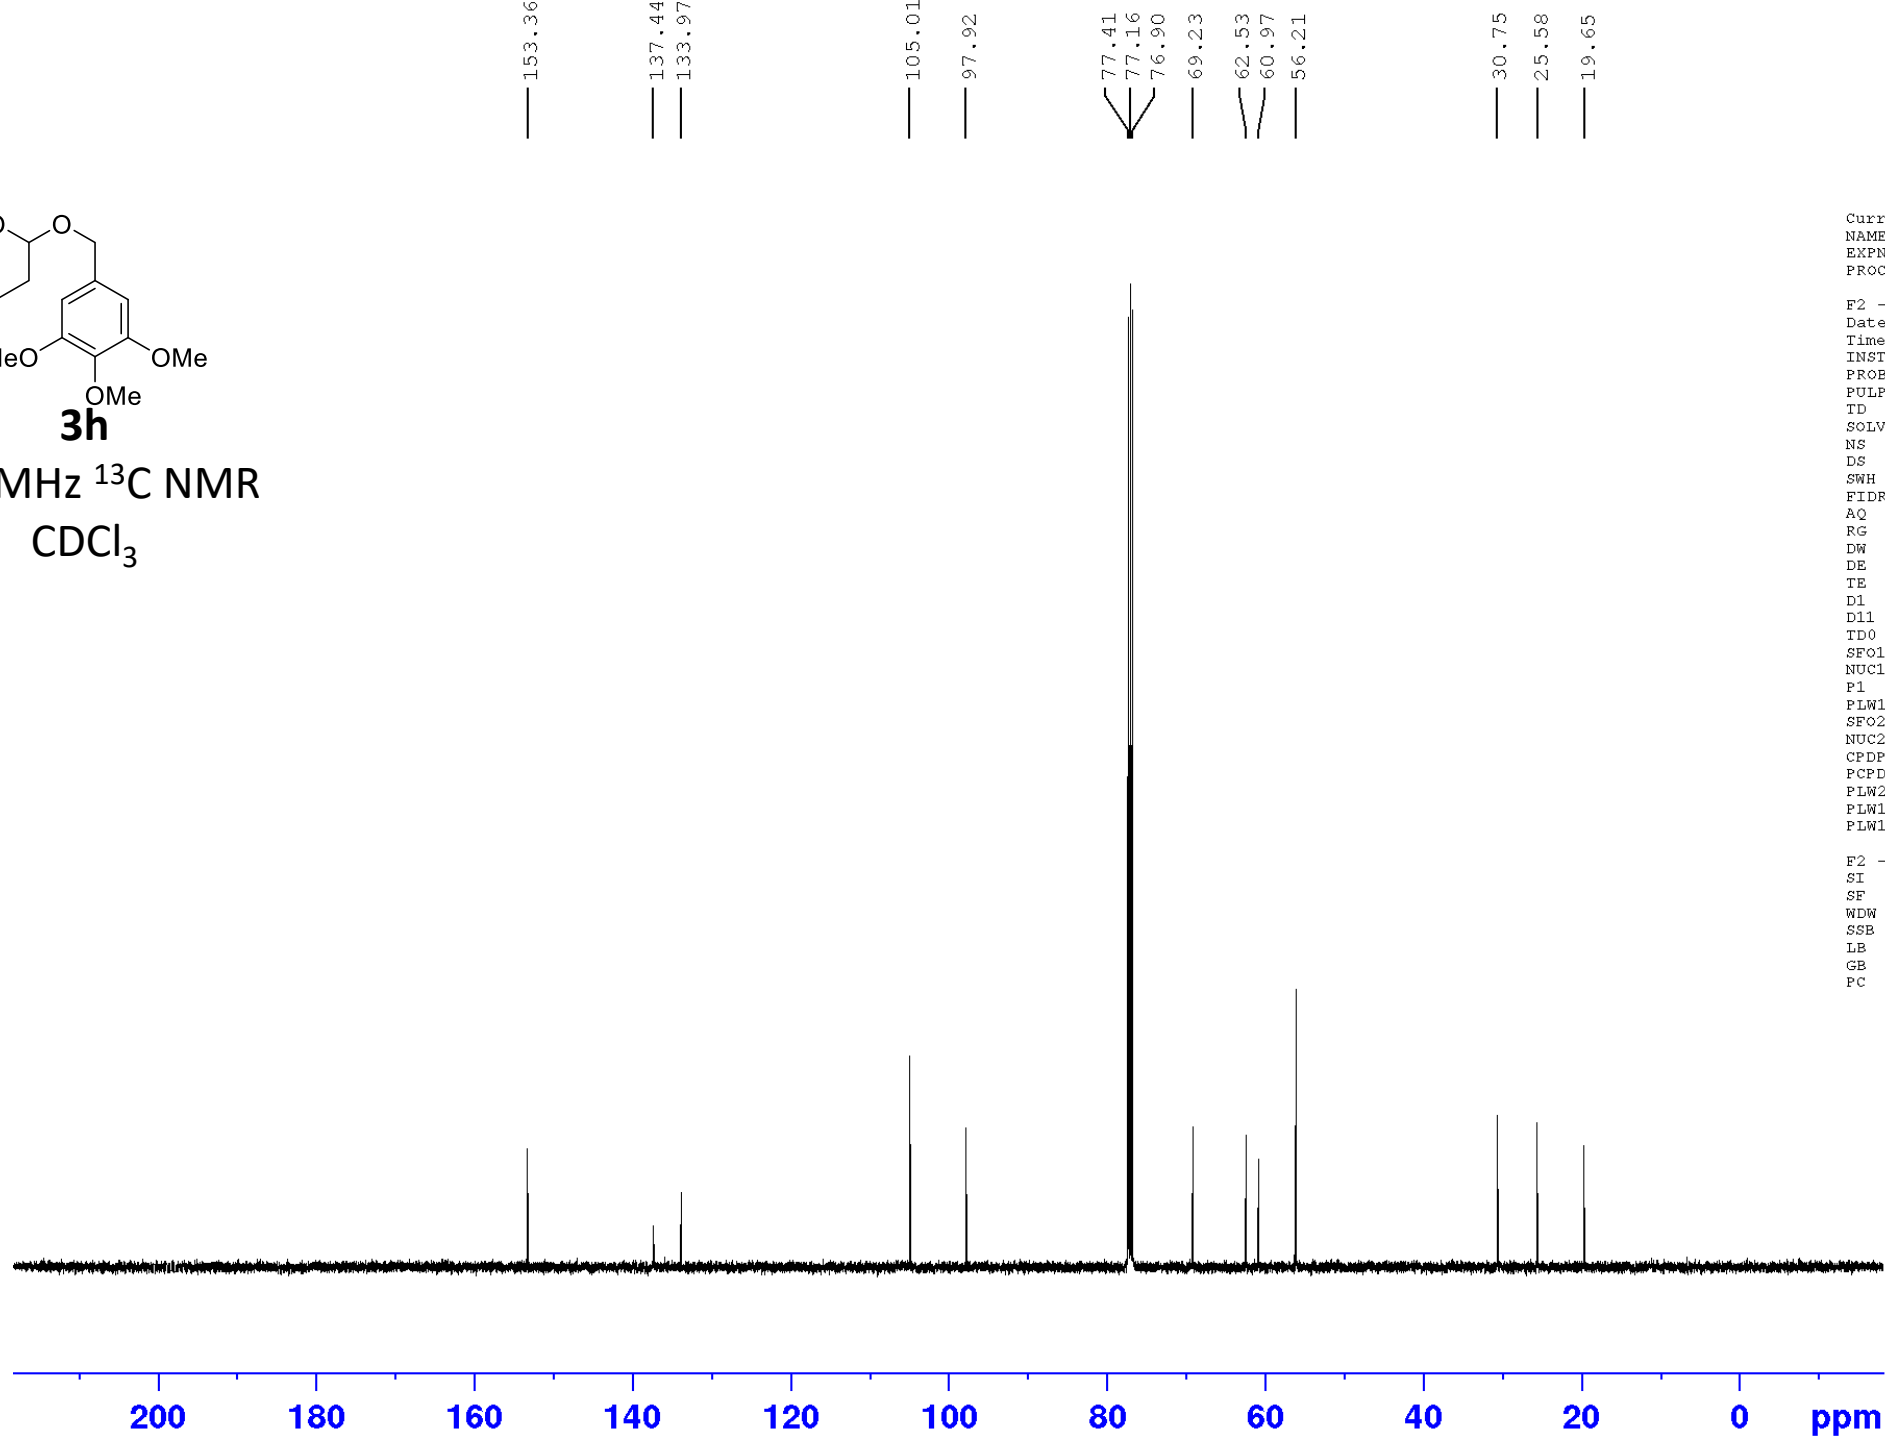

Current Data Parameters  
 NAME vinn-4-137-6-ist2-20200120  
 EXPNO 2  
 PROCNO 1

F2 - Acquisition Parameters  
 Date\_ 20210121  
 Time 8.34 h  
 INSTRUM spect  
 PROBHD Z119470\_0283 (  
 PULPROG zgpg30  
 TD 65536  
 SOLVENT CDCl3  
 NS 256  
 DS 4  
 SWH 29761.904 Hz  
 FIDRES 0.908261 Hz  
 AQ 1.1010048 sec  
 RG 206.72  
 DW 16.800 usec  
 DE 6.50 usec  
 TE 295.2 K  
 D1 2.0000000 sec  
 D11 0.0300000 sec  
 TD0 1  
 SFO1 125.7703643 MHz  
 NUC1 13C  
 P1 9.75 usec  
 PLW1 94.0000000 W  
 SFO2 500.1320005 MHz  
 NUC2 1H  
 CPDPRG[2] waltz16  
 PCPD2 80.00 usec  
 PLW2 25.0000000 W  
 PLW12 0.46495000 W  
 PLW13 0.23387000 W

F2 - Processing parameters  
 SI 32768  
 SF 125.7577734 MHz  
 WDW EM  
 SSB 0  
 LB 1.00 Hz  
 GB 0  
 PC 1.40

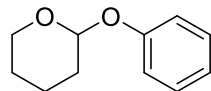

**3i**

500 MHz <sup>1</sup>H NMR  
CDCl<sub>3</sub>

7.309  
7.294  
7.279  
7.078  
7.062  
7.008  
6.993  
6.979  
— 5.435  
3.957  
3.934  
3.915  
3.912  
3.626  
3.616  
3.603  
2.073  
1.989  
1.877  
1.868  
1.773  
1.765  
1.559

```

Current Data Parameters
NAME      vinn-4-139-1-ialt-20201222
EXPNO     1
PROCNO    1

F2 - Acquisition Parameters
Date_     20201223
Time      8.33 h
INSTRUM   spect
PROBHD    z119470_0283 (
PULPROG   zg30
TD         65536
SOLVENT   cdcl3
NS         16
DS         2
SWH        10000.000 Hz
FIDRES     0.305176 Hz
AQ         3.2767999 sec
RG         30.85
DW         50.000 usec
DE         6.50 usec
TE         295.2 K
D1         1.00000000 sec
TD0        1
SFO1      500.1330883 MHz
NUC1       1H
F1         10.91 usec
FLW1       25.00000000 W

F2 - Processing parameters
SI         65536
SF         500.1300123 MHz
WDW        EM
SSB        0
LB         0.30 Hz
GB         0
PC         1.00
  
```

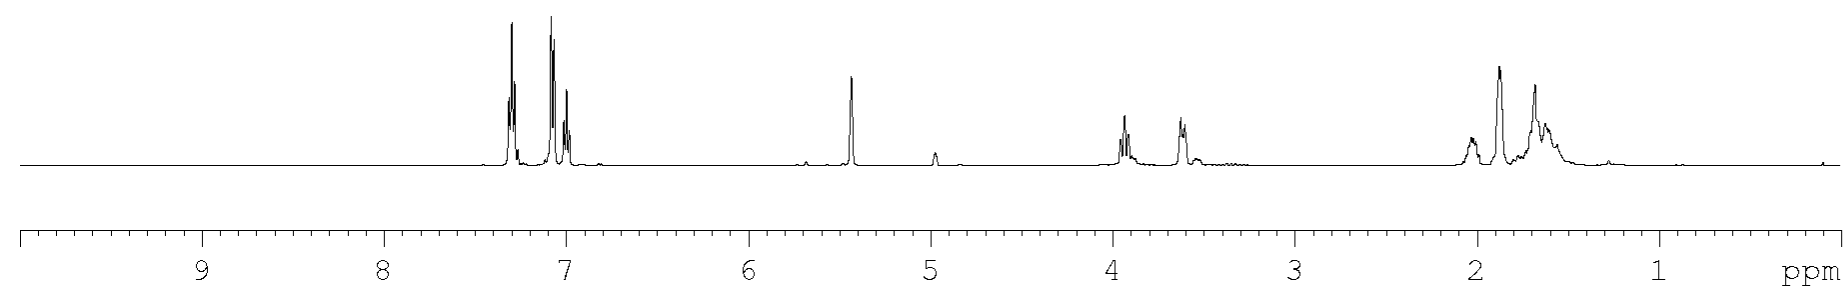

2.14  
2.11  
1.05  
1.00  
1.19  
1.14  
1.11  
2.22  
4.06



**3i**

125 MHz <sup>13</sup>C NMR  
CDCl<sub>3</sub>

— 157.155  
— 129.467  
— 121.671  
— 116.550  
— 96.414  
77.411  
77.157  
76.903  
— 62.150  
— 30.503  
— 25.328  
— 18.939

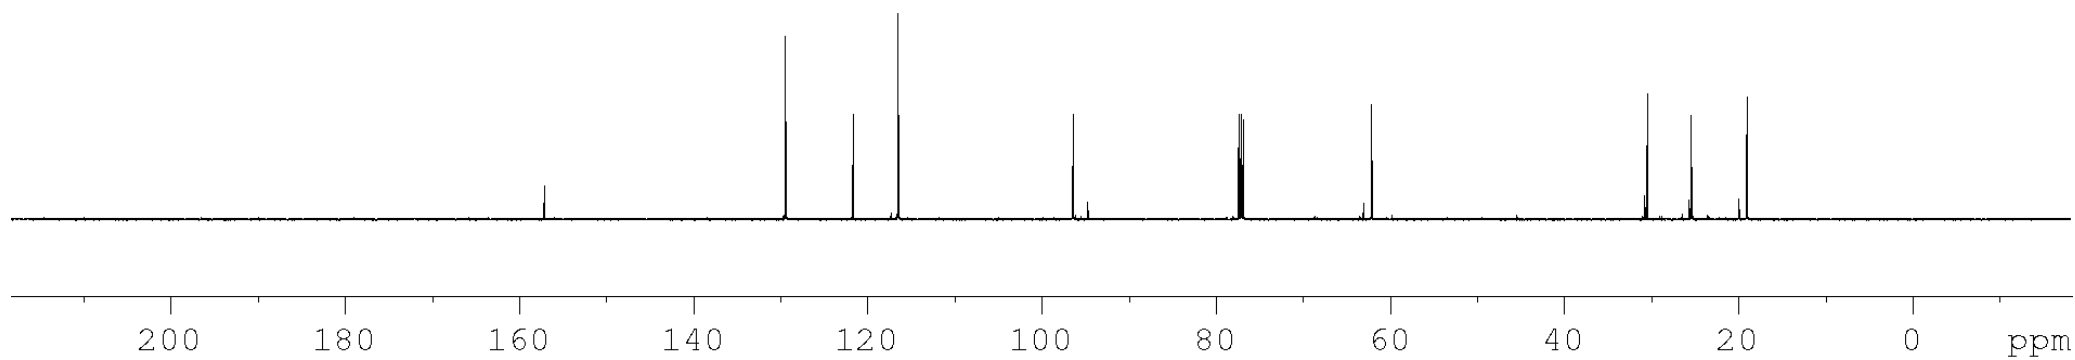

Current Data Parameters  
NAME vinn-4-139-1-ialt-20201222  
EKFNO 2  
PROCNO 1

F2 - Acquisition Parameters  
Date\_ 20201223  
Time 8.41 h  
INSTRUM spect  
PROBHD E119470\_0283 {  
PULPROG zgpg30  
TD 65536  
SOLVENT cdcl3  
NS 128  
DS 4  
SWH 29761.904 Hz  
FIDRES 0.908261 Hz  
AQ 1.1010048 sec  
RG 206.72  
DW 16.800 usec  
DE 6.50 usec  
TE 295.2 K  
D1 2.00000000 sec  
D11 0.03000000 sec  
TD0 1  
SFO1 125.7703643 MHz  
NUC1 13c  
P1 9.75 usec  
PLW1 94.00000000 W  
SFO2 500.1320005 MHz  
NUC2 1H  
CPDPRG[2] waltz16  
PCPD2 80.00 usec  
PLW2 25.00000000 W  
PLW12 0.46495000 W  
PLW13 0.23387000 W

F2 - Processing parameters  
SI 32768  
SF 125.7577796 MHz  
WDW EM  
SSB 0  
LB 1.00 Hz  
GB 0  
PC 1.40

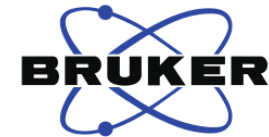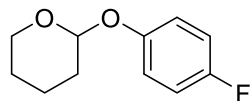

**3j**

500 MHz <sup>1</sup>H NMR  
CDCl<sub>3</sub>

7.0139  
6.9393

5.3277  
5.3211  
5.3146

3.9310  
3.8829  
3.6186  
3.5766

2.0355  
1.9505  
1.8961  
1.8067  
1.7244  
1.5769

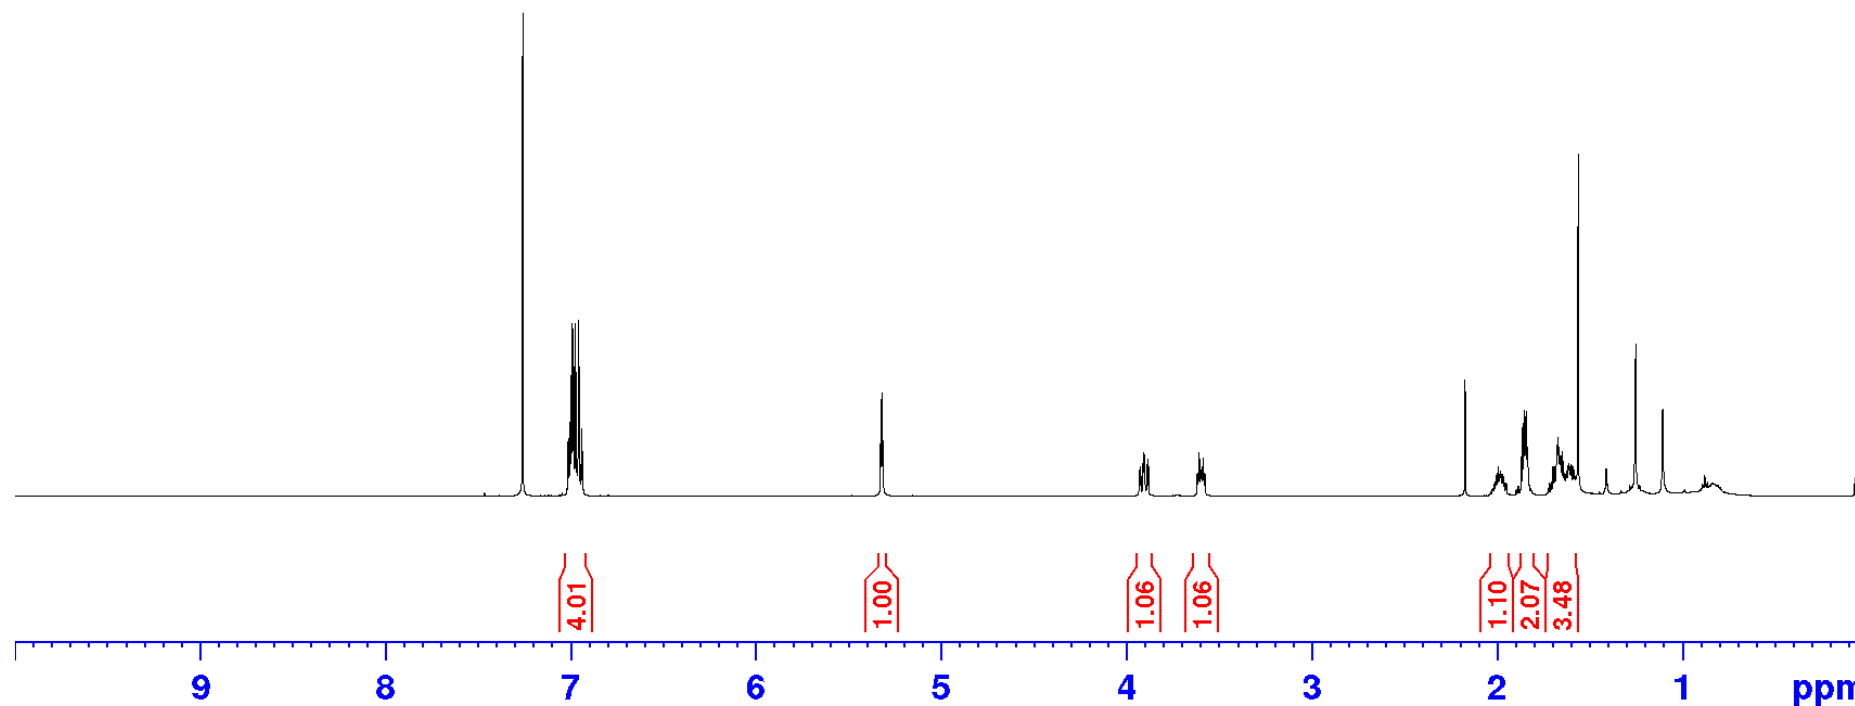

Current Data Parameters  
NAME vinn-4-139-4-2-1st2-20200120  
EXPNO 1  
PROCNO 1

F2 - Acquisition Parameters  
Date\_ 20210121  
Time 9.14 h  
INSTRUM spect  
PROBHD E119470\_0283 (   
PULPROG zg30  
TD 65536  
SOLVENT CDCl3  
NS 16  
DS 2  
SWH 10000.000 Hz  
FIDRES 0.305176 Hz  
AQ 3.2767999 sec  
RG 117.01  
DW 50.000 usec  
DE 6.50 usec  
TE 295.1 K  
D1 1.00000000 sec  
TD0 1  
SFO1 500.1300883 MHz  
NUC1 1H  
P1 10.91 usec  
PLW1 25.00000000 W

F2 - Processing parameters  
SI 65536  
SF 500.1300124 MHz  
WDW EM  
SSB 0  
LB 0.30 Hz  
GB 0  
PC 1.00

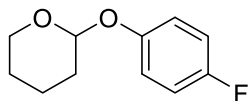

**3j**

125 MHz <sup>13</sup>C NMR  
CDCl<sub>3</sub>

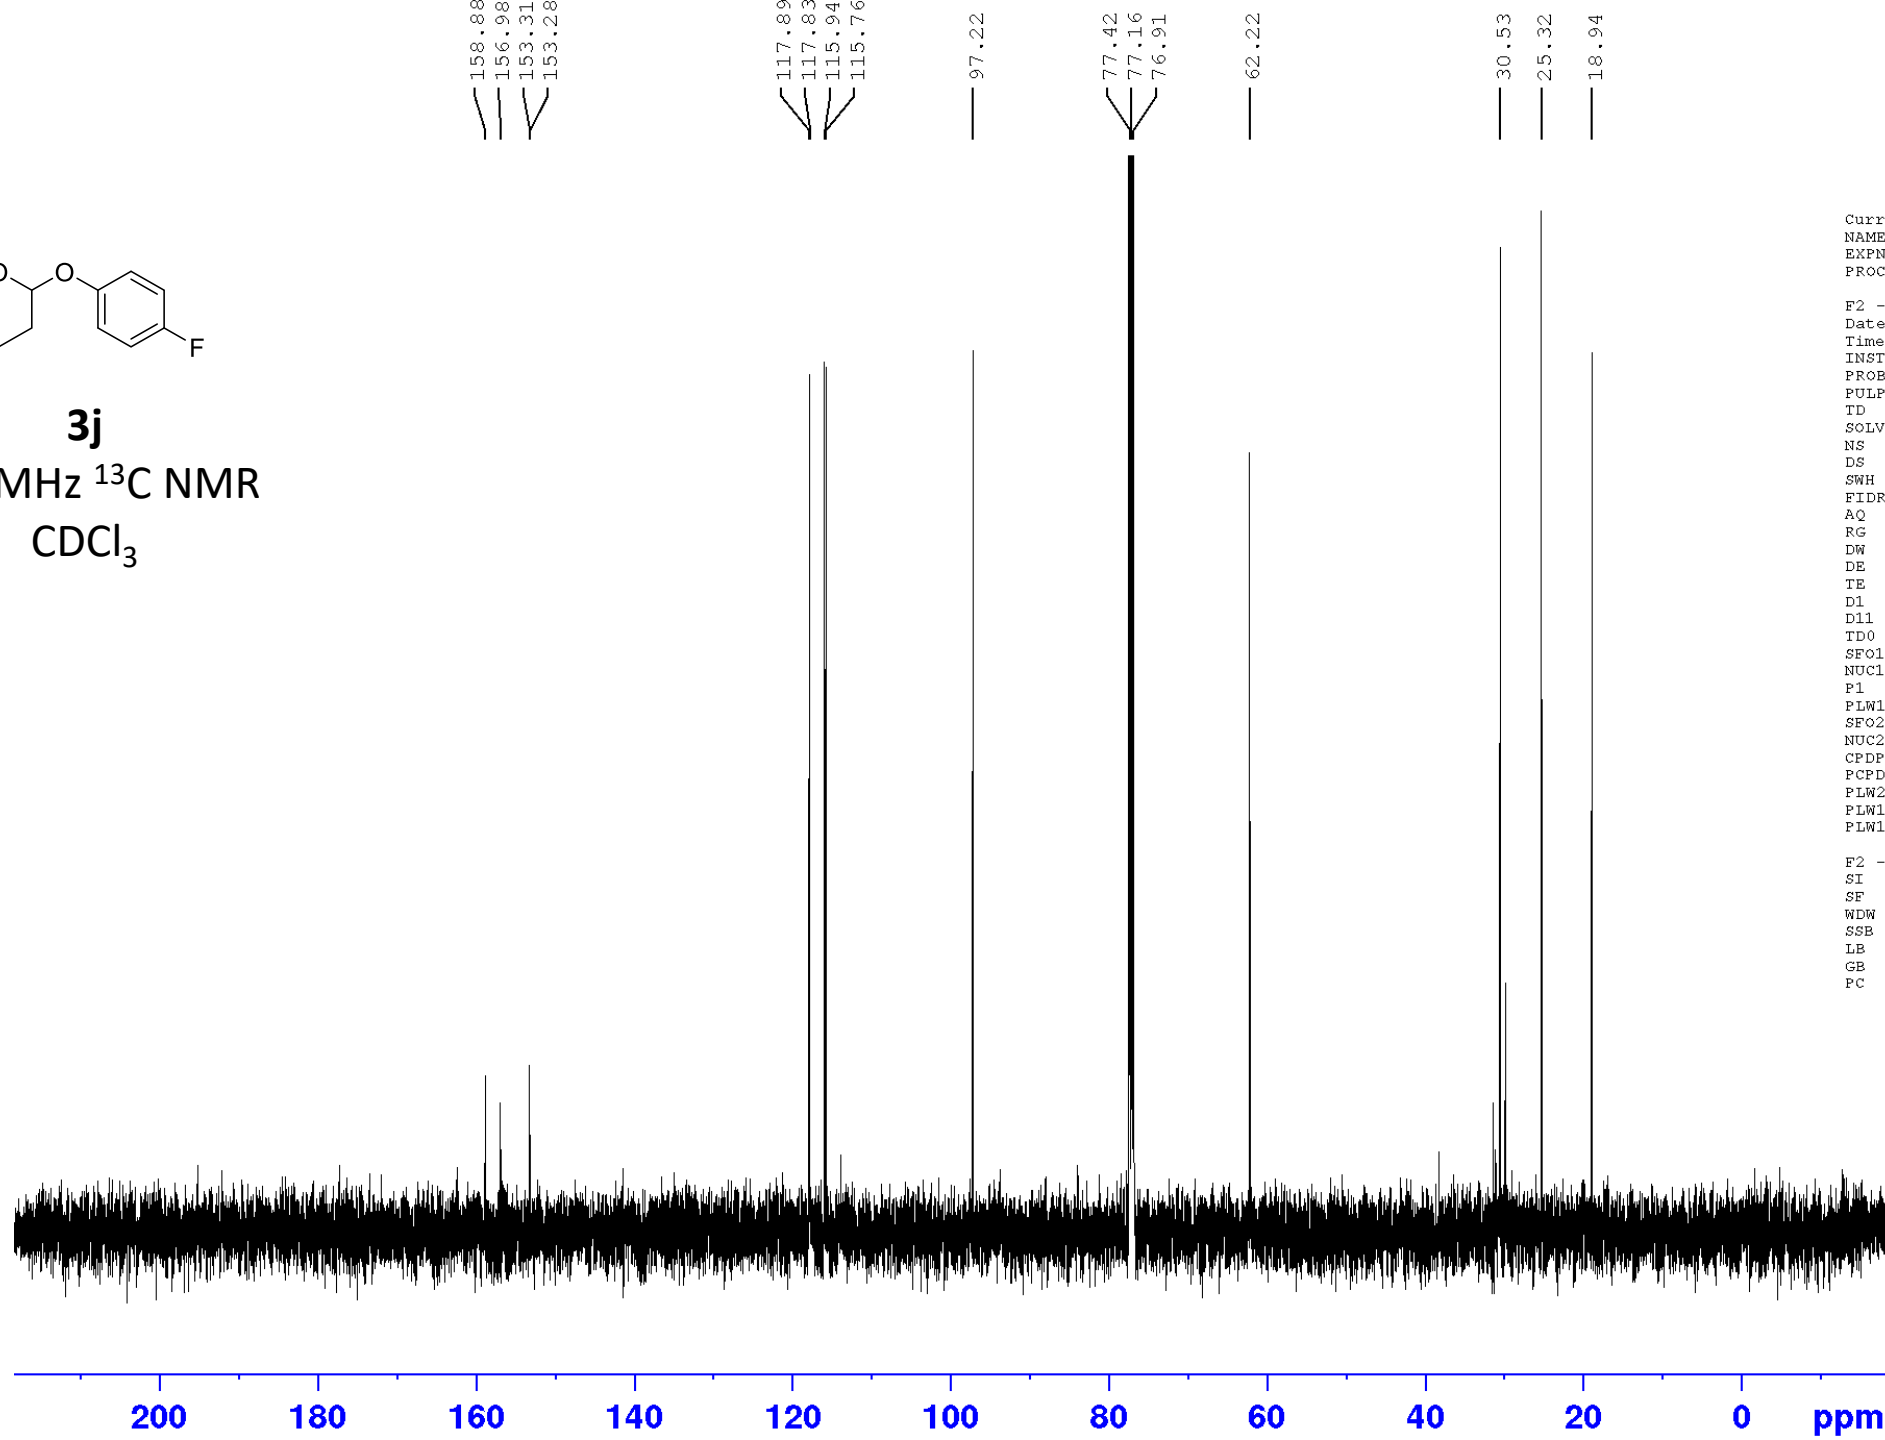

Current Data Parameters  
NAME vinn-4-139-4-2-islt2-2020012  
EXPNO 2  
PROCNO 1

F2 - Acquisition Parameters  
Date\_ 20210121  
Time 9.28 h  
INSTRUM spect  
PROBHD Z119470\_0283 (  
PULPROG zgpg30  
TD 65536  
SOLVENT CDCl3  
NS 256  
DS 4  
SWH 29761.904 Hz  
FIDRES 0.908261 Hz  
AQ 1.1010048 sec  
RG 206.72  
DW 16.800 usec  
DE 6.50 usec  
TE 295.2 K  
D1 2.0000000 sec  
D11 0.0300000 sec  
TD0 1  
SFO1 125.7703643 MHz  
NUC1 13C  
P1 9.75 usec  
PLW1 94.0000000 W  
SFO2 500.1320005 MHz  
NUC2 1H  
CPDPRG[2] waltz16  
PCPD2 80.00 usec  
PLW2 25.0000000 W  
PLW12 0.46495000 W  
PLW13 0.23387000 W

F2 - Processing parameters  
SI 32768  
SF 125.7665629 MHz  
WDW EM  
SSB 0  
LB 1.00 Hz  
GB 0  
PC 1.40



**3j**

470 MHz <sup>19</sup>F NMR  
CDCl<sub>3</sub>

-122.866  
-122.87  
-122.888  
-122.89  
-122.90  
-122.91  
-122.92

Current Data Parameters  
NAME vinn-4-139-4-2-islt2-2020012  
EXPNO 3  
PROCNO 1

F2 - Acquisition Parameters  
Date\_ 20210121  
Time 9.30 h  
INSTRUM spect  
PROBHD z119470\_0283 (  
PULPROG zgflgn  
TD 131072  
SOLVENT CDCl3  
NS 16  
DS 4  
SWH 113636.367 Hz  
FIDRES 1.733953 Hz  
AQ 0.5767168 sec  
RG 206.72  
DW 4.400 usec  
DE 6.50 usec  
TE 295.2 K  
D1 1.00000000 sec  
TD0 1  
SFO1 470.5453180 MHz  
NUC1 19F  
P1 15.00 usec  
PLW1 47.23500061 W

F2 - Processing parameters  
SI 65536  
SF 470.5923772 MHz  
WDW EM  
SSB 0  
LB 0.30 Hz  
GB 0  
PC 1.00

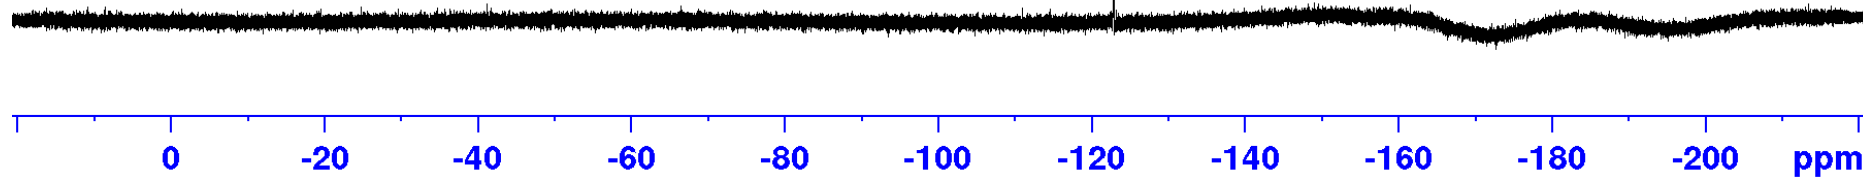

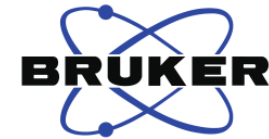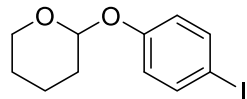

**3k**  
500 MHz <sup>1</sup>H NMR  
CDCl<sub>3</sub>

7.5582  
7.5426  
6.8403  
6.8247  
5.3761  
3.8767  
3.8543  
3.8336  
3.6025  
3.5934  
3.5801  
2.0155  
1.9441  
1.8478  
1.8402  
1.7193  
1.5770

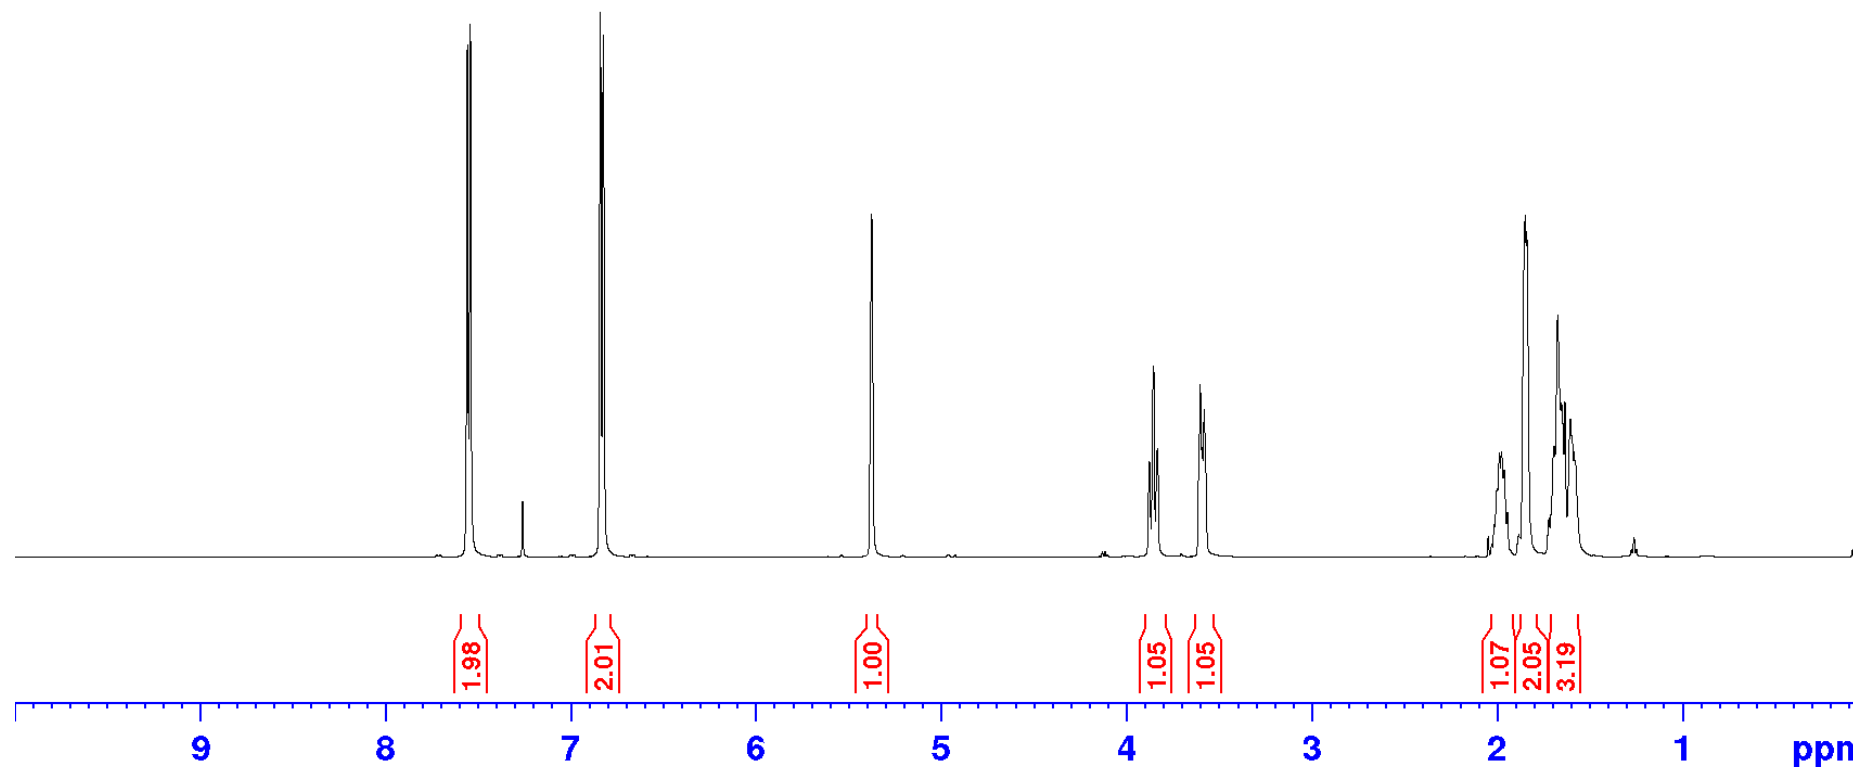

```
Current Data Parameters
NAME      vinn-4-139-3-isl-20201222
EXPNO    1
PROCNO   1

F2 - Acquisition Parameters
Date_    20201223
Time     8.44 h
INSTRUM  spect
PROBHD   zg30
PULPROG  zg30
TD       65536
SOLVENT  CDCl3
NS       16
DS       2
SWH      10000.000 Hz
FIDRES   0.305176 Hz
AQ       3.2767999 sec
RG       30.85
DW       50.000 usec
DE       6.50 usec
TE       295.2 K
D1       1.0000000 sec
TD0      1
SFO1     500.1330883 MHz
NUC1     1H
P1       10.91 usec
PLW1     25.0000000 W

F2 - Processing parameters
SI       65536
SF       500.1300120 MHz
WDW      EM
SSB      0
LB       0.30 Hz
GB       0
PC       1.00
```

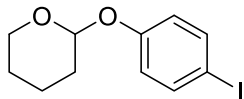

**3k**

125 MHz <sup>13</sup>C NMR  
CDCl<sub>3</sub>

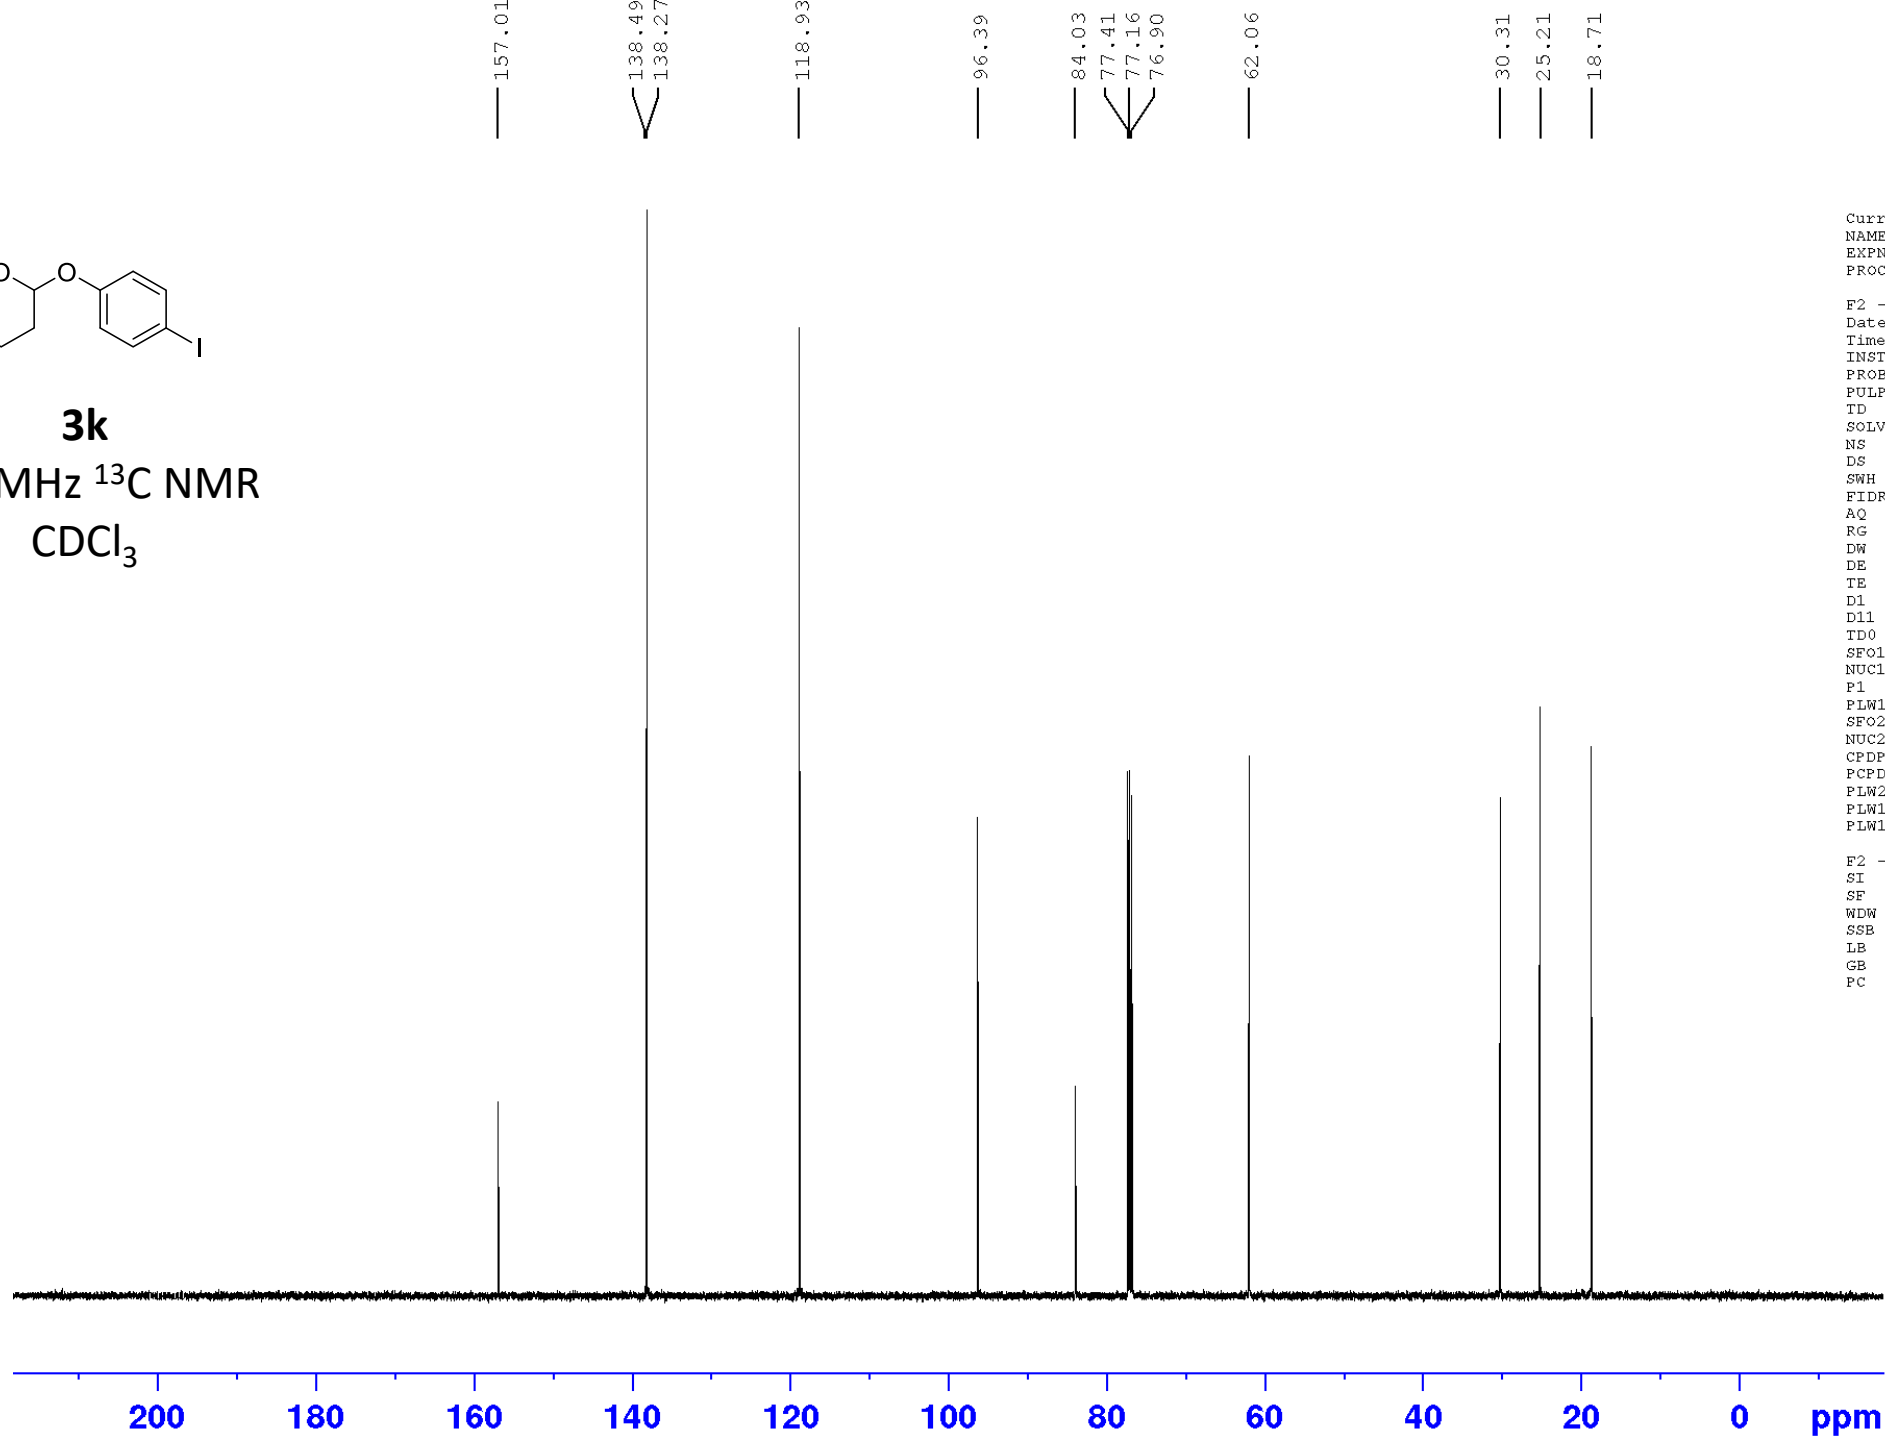

Current Data Parameters  
NAME vinn-4-139-3-islt-20201222  
EXPNO 2  
PROCNO 1

F2 - Acquisition Parameters

Date\_ 20201223  
Time 8.51 h  
INSTRUM spect  
PROBHD Z119470\_0283 (  
PULPROG zgpg30  
TD 65536  
SOLVENT CDCl3  
NS 128  
DS 4  
SWH 29761.904 Hz  
FIDRES 0.908261 Hz  
AQ 1.1010048 sec  
RG 206.72  
DW 16.800 usec  
DE 6.50 usec  
TE 295.1 K  
D1 2.0000000 sec  
D11 0.0300000 sec  
TD0 1  
SFO1 125.7703643 MHz  
NUC1 13C  
P1 9.75 usec  
PLW1 94.0000000 W  
SFO2 500.1320005 MHz  
NUC2 1H  
CPDPRG[2] waltz16  
PCPD2 80.00 usec  
PLW2 25.0000000 W  
PLW12 0.46495000 W  
PLW13 0.23387000 W

F2 - Processing parameters

SI 32768  
SF 125.7577797 MHz  
WDW EM  
SSB 0  
LB 1.00 Hz  
GB 0  
PC 1.40



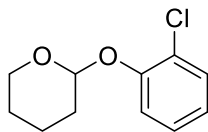

**3I**

400 MHz <sup>1</sup>H NMR  
CDCl<sub>3</sub>

7.372  
7.369  
7.351  
7.193  
7.176  
5.508  
5.501  
5.494  
3.957  
3.950  
3.930  
3.923  
3.903  
3.895  
3.638  
3.587  
2.154  
2.044  
2.004  
1.953  
1.923  
1.843  
1.772  
1.609

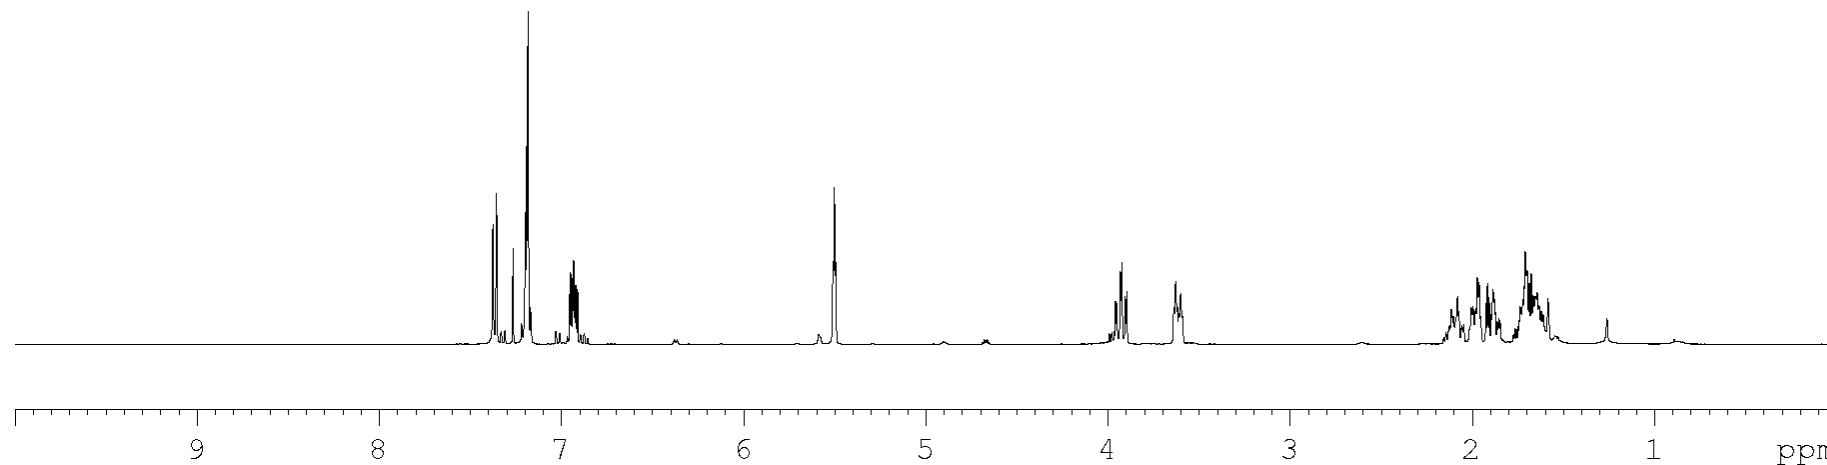

0.99  
2.06  
0.98  
1.00  
1.06  
1.03  
1.07  
1.15  
1.20  
3.19

```

Current Data Parameters
NAME      Andy-1-180-3-ialt-20220817
EXPNO     4
PROCNO    1

F2 - Acquisition Parameters
Date_     20220819
Time      17.55 h
INSTRUM   spect
PROBHD    zg30
PULPROG   zg30
TD         65536
SOLVENT   CDCl3
NS         16
DS         2
SWH        8012.820 Hz
FIDRES     0.244532 Hz
AQ         4.0894465 sec
RG         203
DW         62.400 usec
DE         6.50 usec
TE         296.2 K
D1         1.00000000 sec
TD0        1
SFO1       400.1324708 MHz
NUC1       1H
P1         15.00 usec
PLW1       12.50000000 W

F2 - Processing parameters
SI         65536
SF         400.1300098 MHz
WDW        EM
SSB        0
LB         0.30 Hz
GB         0
PC         1.00

```

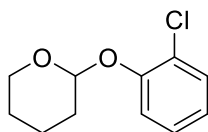

**3I**

100 MHz <sup>13</sup>C NMR  
CDCl<sub>3</sub>

— 152.664  
 / 130.324  
 \ 127.727  
 / 123.957  
 \ 122.455  
 / 117.059  
 — 96.919  
 / 77.475  
 \ 77.157  
 / 76.840  
 — 61.984  
 — 30.317  
 — 25.345  
 — 18.483

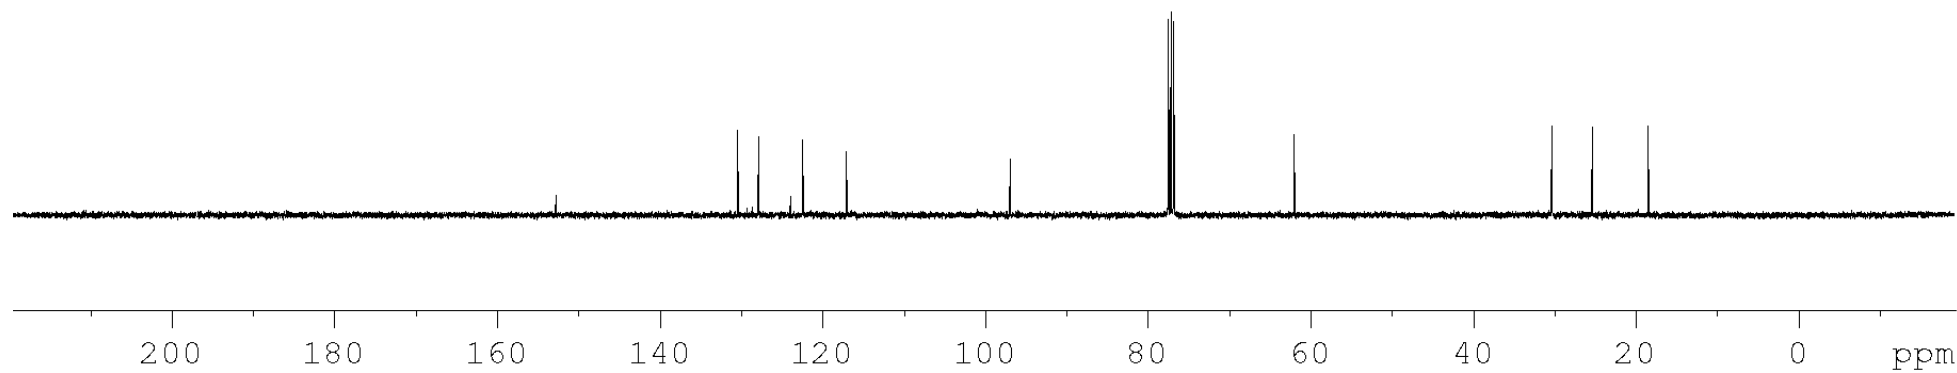

Current Data Parameters  
 NAME Andy-1-180-3-isl-20220817  
 EKPCNO 5  
 PROCNO 1

F2 - Acquisition Parameters  
 Date\_ 20220819  
 Time 18.00 h  
 INSTRUM spect  
 PROBHD E108618\_0257 ( )  
 PULPROG zgpg30  
 TD 65536  
 SOLVENT CDCl3  
 NS 62  
 DS 4  
 SWH 24038.461 Hz  
 FIDRES 0.733596 Hz  
 AQ 1.3631488 sec  
 RG 203  
 DW 20.800 usec  
 DE 6.50 usec  
 TE 296.6 K  
 D1 2.00000000 sec  
 D11 0.03000000 sec  
 TD0 1  
 SFO1 100.6228298 MHz  
 NUC1 13c  
 P1 10.00 usec  
 PLW1 51.00000000 W  
 SFO2 400.1316005 MHz  
 NUC2 1H  
 CPDPRG[2] waltz16  
 FCFD2 90.00 usec  
 PLW2 12.50000000 W  
 PLW12 0.34722000 W  
 PLW13 0.17465000 W

F2 - Processing parameters  
 SI 32768  
 SF 100.6127565 MHz  
 ---

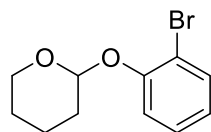

**3m**

500 MHz <sup>1</sup>H NMR  
CDCl<sub>3</sub>

7.235  
7.133  
7.117  
6.988  
6.973

5.405  
5.400  
5.394

3.896  
3.847  
3.633  
3.595

2.030  
1.943  
1.864  
1.833  
1.730  
1.549

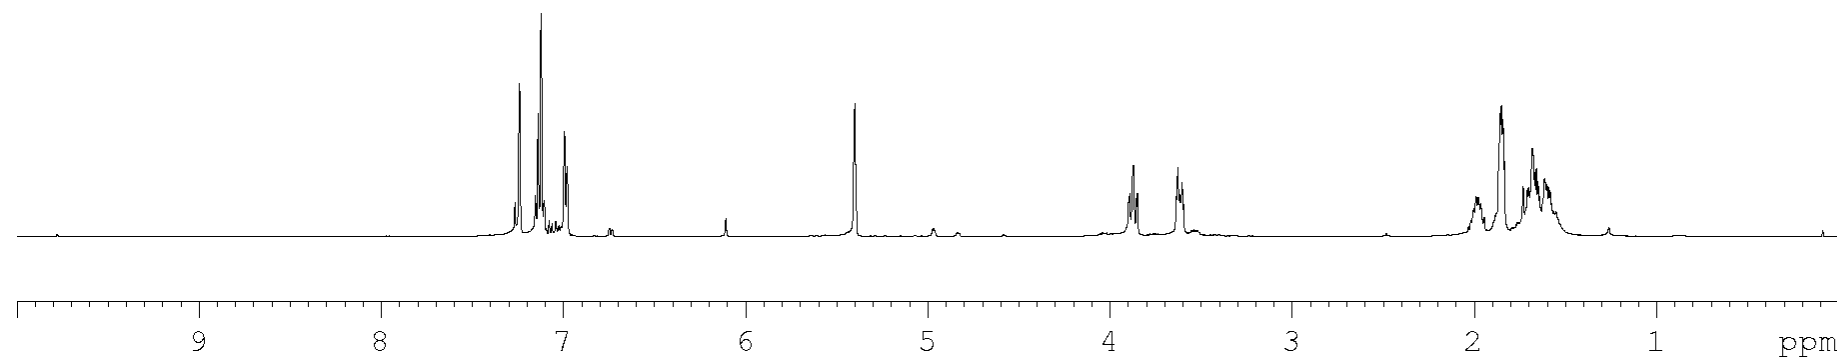

1.16  
2.07  
1.07

1.00

1.20  
1.16

1.24  
2.43  
4.37

```

Current Data Parameters
NAME      vinn-4-139-2-2-ialt2-20210111
EXPNO    1
PROCNO   1

F2 - Acquisition Parameters
Date_    20210111
Time     18.36 h
INSTRUM  spect
PROBHD   zg30
PULPROG  zg30
TD        65536
SOLVENT  CDCl3
NS        16
DS        2
SWH      10000.000 Hz
FIDRES   0.305176 Hz
AQ        3.2767999 sec
RG        30.85
DW        50.000 usec
DE        6.50 usec
TE        295.1 K
D1        1.00000000 sec
TD0       1
SFO1     500.1330883 MHz
NUC1      1H
P1        10.91 usec
PLW1     25.00000000 W

F2 - Processing parameters
SI        65536
SF        500.1300128 MHz
WDW       EM
SSB       0
LB        0.30 Hz
GB        0
PC        1.00

```

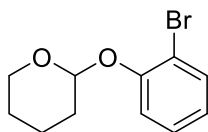

**3m**

125 MHz <sup>13</sup>C NMR  
CDCl<sub>3</sub>

— 157.962  
 / 130.588  
 / 124.769  
 / 122.748  
 / 119.958  
 / 115.368  
 — 96.561  
 / 77.447  
 / 77.193  
 / 76.938  
 — 62.137  
 — 30.345  
 — 25.240  
 — 18.709

Current Data Parameters  
 NAME vinn-4-139-2-2-ialt2-20210111  
 EXPNO 2  
 PROCNO 1

F2 - Acquisition Parameters  
 Date\_ 20210111  
 Time 18.43 h  
 INSTRUM spect  
 PROBHD E119470\_0283 (zpgg30  
 PULPROG zpgg30  
 TD 65536  
 SOLVENT CDCl3  
 NS 100  
 DS 4  
 SWH 29761.904 Hz  
 FIDRES 0.908261 Hz  
 AQ 1.1010048 sec  
 RG 117.01  
 DW 16.800 usec  
 DE 6.50 usec  
 TE 295.2 K  
 D1 2.00000000 sec  
 D11 0.03000000 sec  
 TDO 1  
 SFO1 125.7703643 MHz  
 NUC1 13c  
 P1 9.75 usec  
 PLW1 94.00000000 W  
 SFO2 500.1320005 MHz  
 NUC2 1H  
 CPDPRG2 waltz16  
 PCPD2 80.00 usec  
 PLW2 25.00000000 W  
 PLW12 0.46495000 W  
 PLW13 0.23387000 W

F2 - Processing parameters  
 SI 32768  
 SF 125.7577740 MHz  
 ---

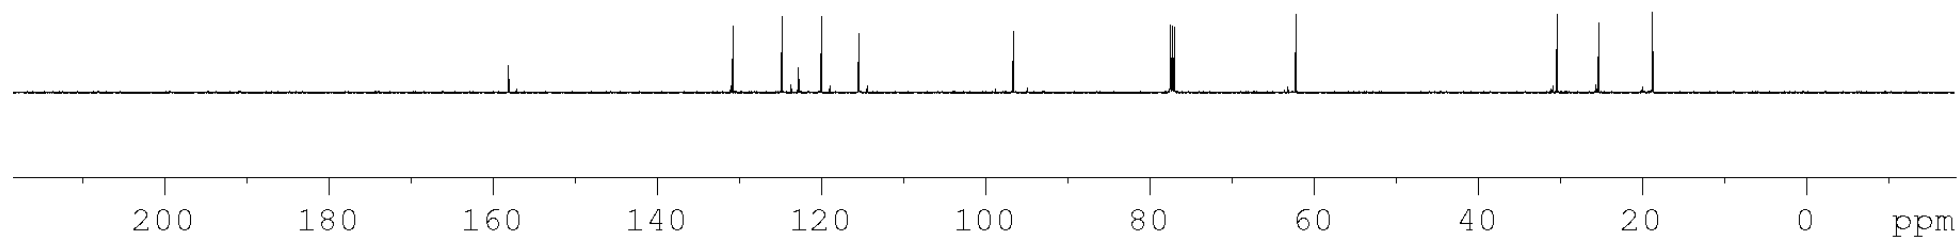

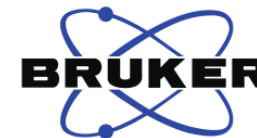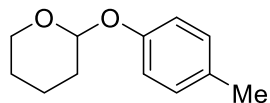

**3n**  
500 MHz <sup>1</sup>H NMR  
CDCl<sub>3</sub>

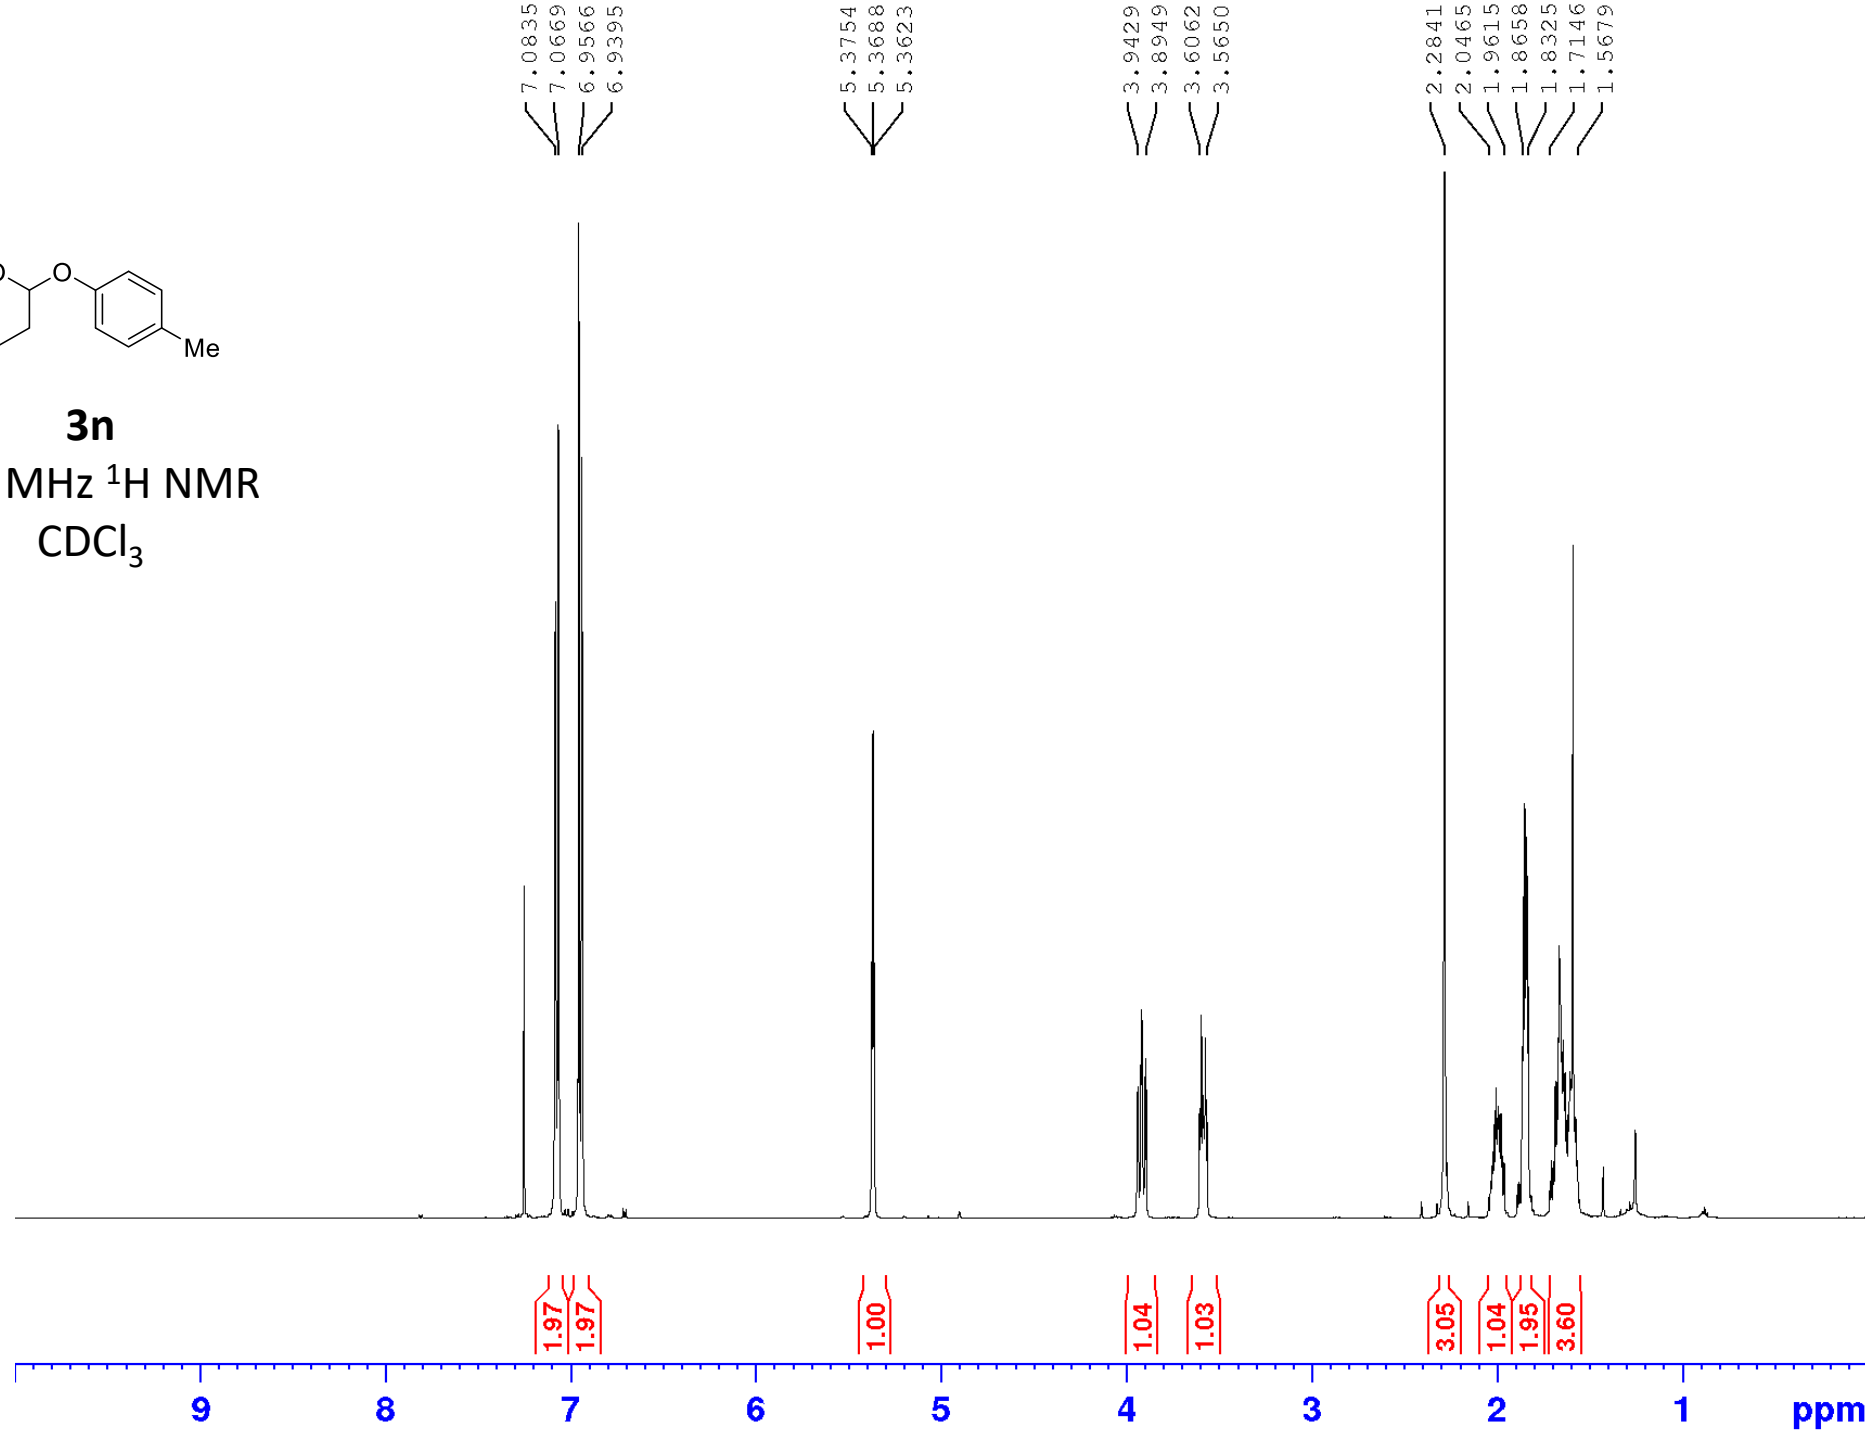

```
Current Data Parameters
NAME      vinn-4-190-3-clm9-20230103
EXPNO     1
PROCNO    1

F2 - Acquisition Parameters
Date_     20230103
Time      17.02 h
INSTRUM   spect
PROBHD    E119470_0283 {
PULPROG   zg30
TD         65536
SOLVENT   CDCl3
NS         16
DS         2
SWH        10000.000 Hz
FIDRES     0.305176 Hz
AQ         3.2767999 sec
RG         93.28
DW         50.000 usec
DE         6.50 usec
TE         295.1 K
D1         1.00000000 sec
TD0        1
SFO1       500.1330883 MHz
NUC1       1H
F1         10.91 usec
PLW1       25.00000000 W

F2 - Processing parameters
SI         65536
SF         500.1300163 MHz
WDW        EM
SSB        0
LB         0.30 Hz
GB         0
PC         1.00
```



**3n**

125 MHz <sup>13</sup>C NMR  
CDCl<sub>3</sub>

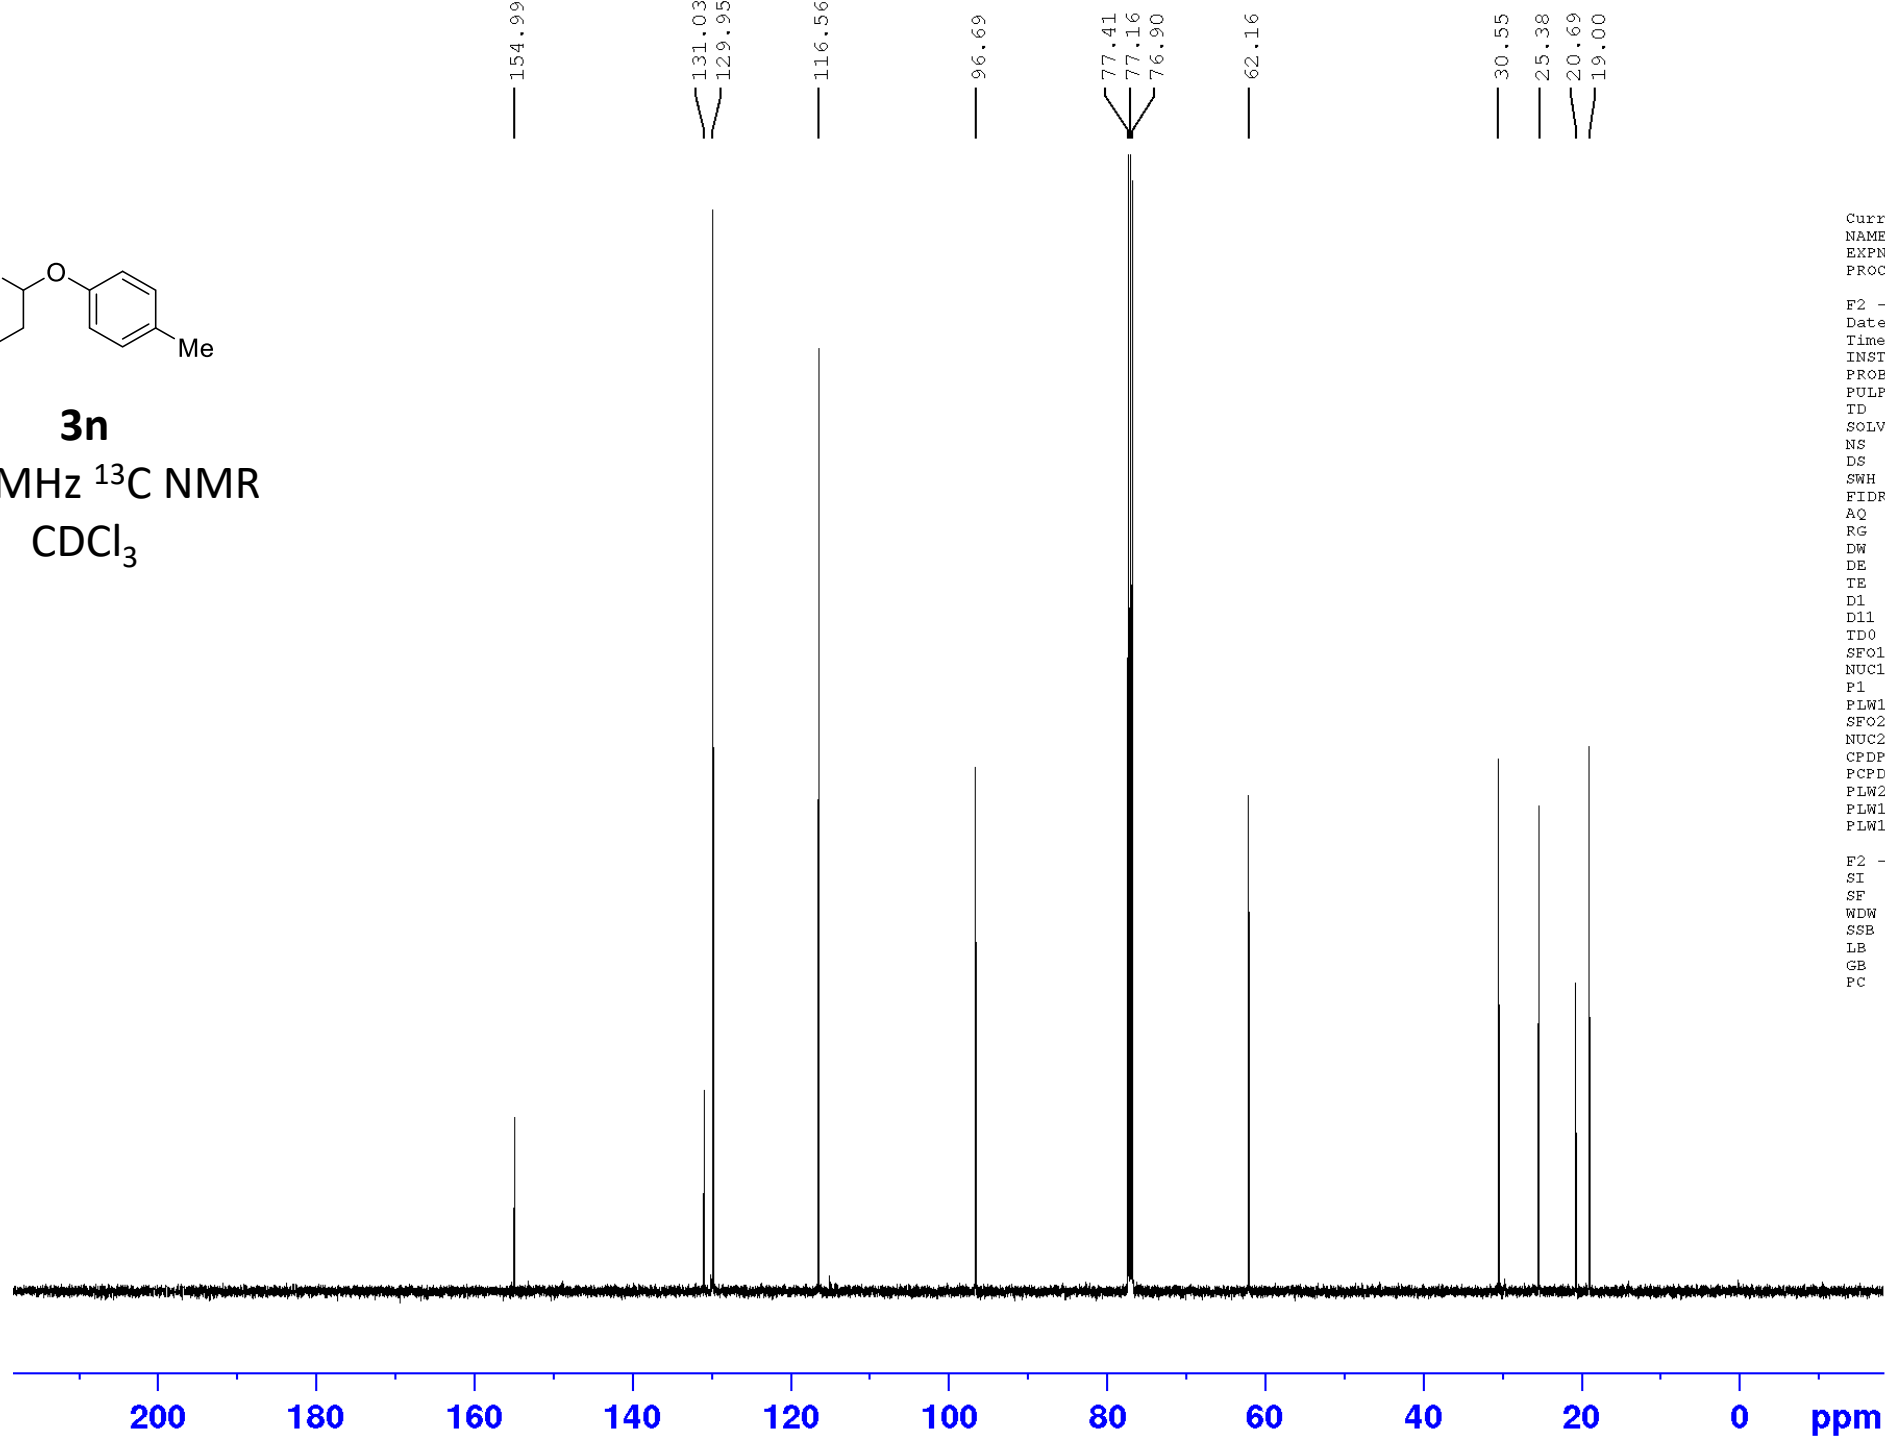

Current Data Parameters  
NAME vinn-4-190-3-clm9-20230103  
EXPNO 2  
PROCNO 1

F2 - Acquisition Parameters  
Date\_ 20230103  
Time 18.26 h  
INSTRUM spect  
PROBHD Z119470\_0283 (  
PULPROG zgpg30  
TD 65536  
SOLVENT CDCl3  
NS 300  
DS 4  
SWH 29761.904 Hz  
FIDRES 0.908261 Hz  
AQ 1.1010048 sec  
RG 163.99  
DW 16.800 usec  
DE 6.50 usec  
TE 295.2 K  
D1 2.0000000 sec  
D11 0.0300000 sec  
TD0 1  
SFO1 125.7703643 MHz  
NUC1 13C  
P1 9.75 usec  
PLW1 94.0000000 W  
SFO2 500.1320005 MHz  
NUC2 1H  
CPDPRG[2] waltz16  
PCPD2 80.00 usec  
PLW2 25.0000000 W  
PLW12 0.46495000 W  
PLW13 0.23387000 W

F2 - Processing parameters  
SI 32768  
SF 125.7577750 MHz  
WDW EM  
SSB 0  
LB 1.00 Hz  
GB 0  
PC 1.40

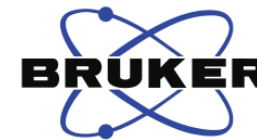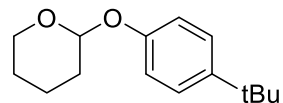

**3o**

500 MHz <sup>1</sup>H NMR  
CDCl<sub>3</sub>

7.3228  
7.3055  
7.0156  
6.9982

5.4121

3.9680  
3.9483  
3.9311  
3.9261  
3.6249  
3.6181  
3.6161  
3.6028

2.0414  
1.9883  
1.8678  
1.8601  
1.7300  
1.6044  
1.3169

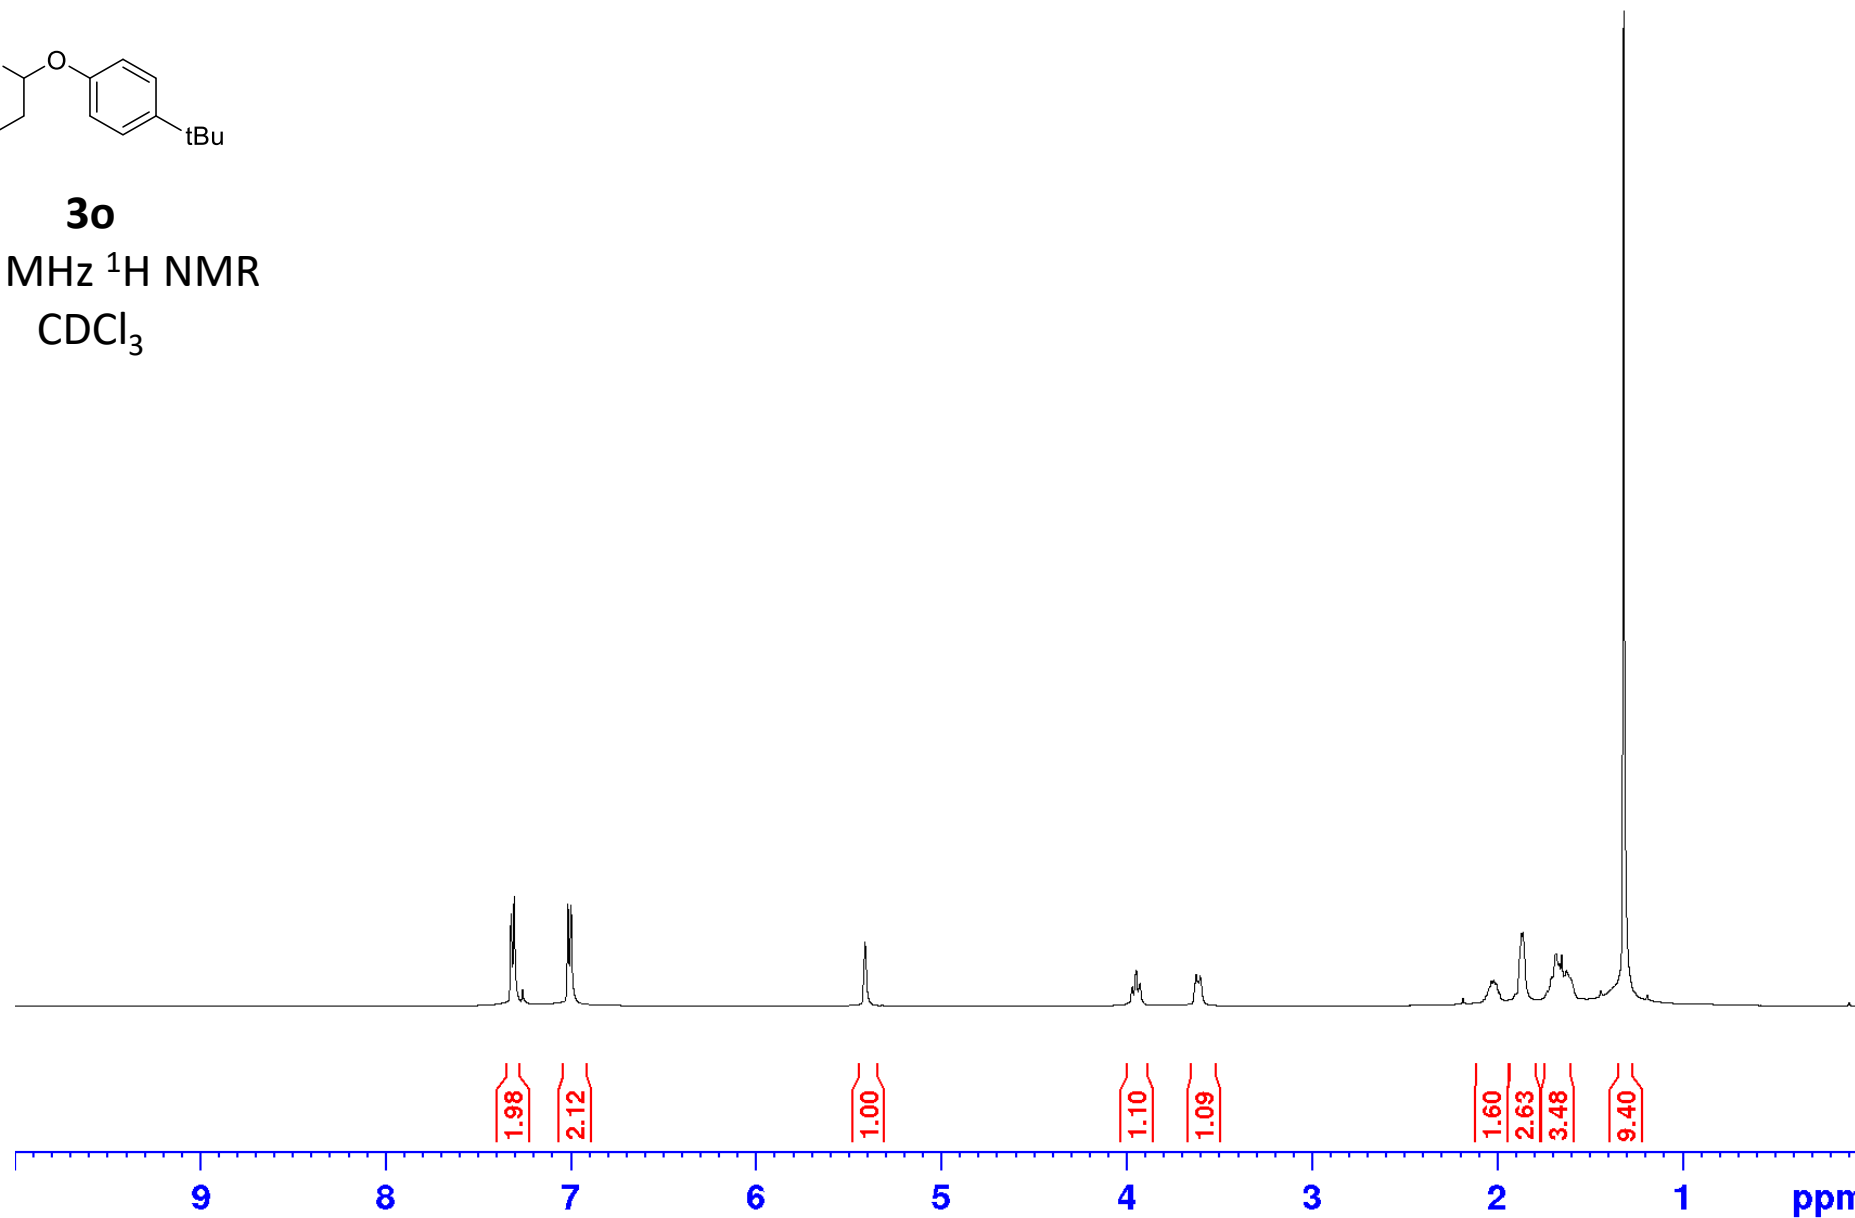

```
Current Data Parameters
NAME      vinn-4-139-8-isl2-2020012
EXPNO     1
PROCNO    1

F2 - Acquisition Parameters
Date_     20210121
Time      7.42 h
INSTRUM   spect
PROBHD    zg30
PULPROG   zg30
TD        65536
SOLVENT   CDCl3
NS         16
DS         2
SWH        10000.000 Hz
FIDRES     0.305176 Hz
AQ         3.2767999 sec
RG         30.85
DW         50.000 usec
DE         6.50 usec
TE         295.2 K
D1         1.00000000 sec
TD0        1
SF01       500.1330883 MHz
NUC1       1H
F1         10.91 usec
PLW1       25.00000000 W

F2 - Processing parameters
SI         65536
SF         500.1300131 MHz
WDW        EM
SSB        0
LB         0.30 Hz
GB         0
PC         1.00
```

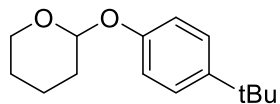

**3o**

125 MHz <sup>13</sup>C NMR  
CDCl<sub>3</sub>

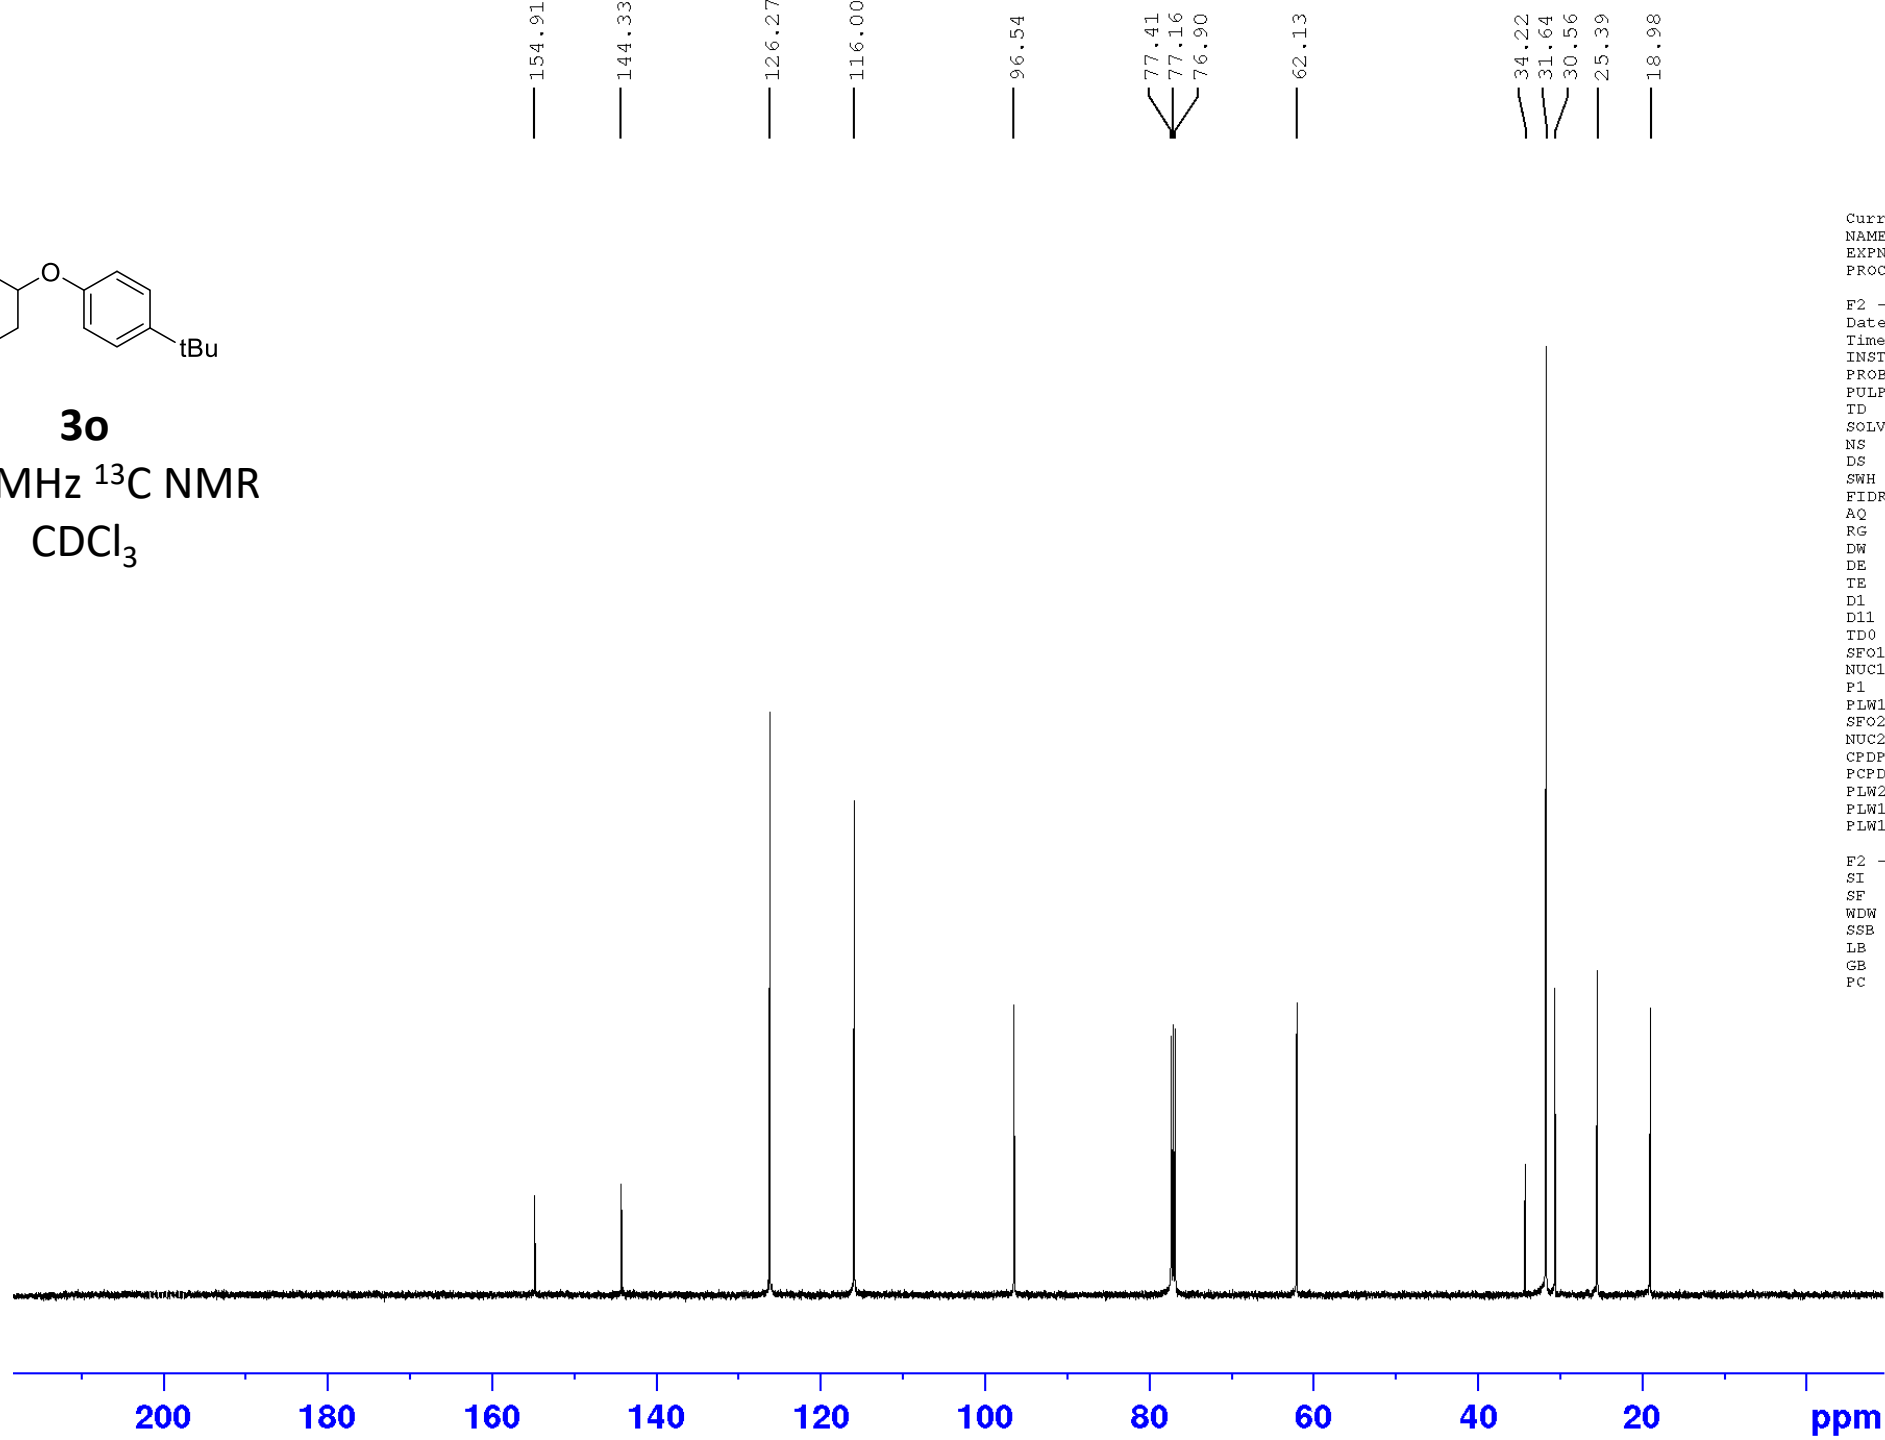

Current Data Parameters  
NAME vinn-4-139-8-isl2-20200120  
EXPNO 2  
PROCNO 1

F2 - Acquisition Parameters  
Date\_ 20210121  
Time 7.56 h  
INSTRUM spect  
PROBHD Z119470\_0283 (  
PULPROG zgpg30  
TD 65536  
SOLVENT CDCl3  
NS 256  
DS 4  
SWH 29761.904 Hz  
FIDRES 0.908261 Hz  
AQ 1.1010048 sec  
RG 206.72  
DW 16.800 usec  
DE 6.50 usec  
TE 295.1 K  
D1 2.0000000 sec  
D11 0.0300000 sec  
TD0 1  
SFO1 125.7703643 MHz  
NUC1 13C  
P1 9.75 usec  
PLW1 94.0000000 W  
SFO2 500.1320005 MHz  
NUC2 1H  
CPDPRG[2] waltz16  
PCPD2 80.00 usec  
PLW2 25.0000000 W  
PLW12 0.46495000 W  
PLW13 0.23387000 W

F2 - Processing parameters  
SI 32768  
SF 125.7577780 MHz  
WDW EM  
SSB 0  
LB 1.00 Hz  
GB 0  
PC 1.40



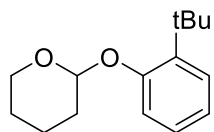

**3p**  
400 MHz <sup>1</sup>H NMR  
CDCl<sub>3</sub>

7.3117  
7.2892  
7.2064  
7.1369  
6.9433  
6.9026

5.5009  
5.4937  
5.4866

3.9474  
3.9405  
3.9192  
3.9132  
3.8934  
3.8857  
3.6890  
3.6386

2.1017  
2.0122  
1.9466  
1.9045  
1.7974  
1.6891  
1.6702  
1.6118  
1.4279

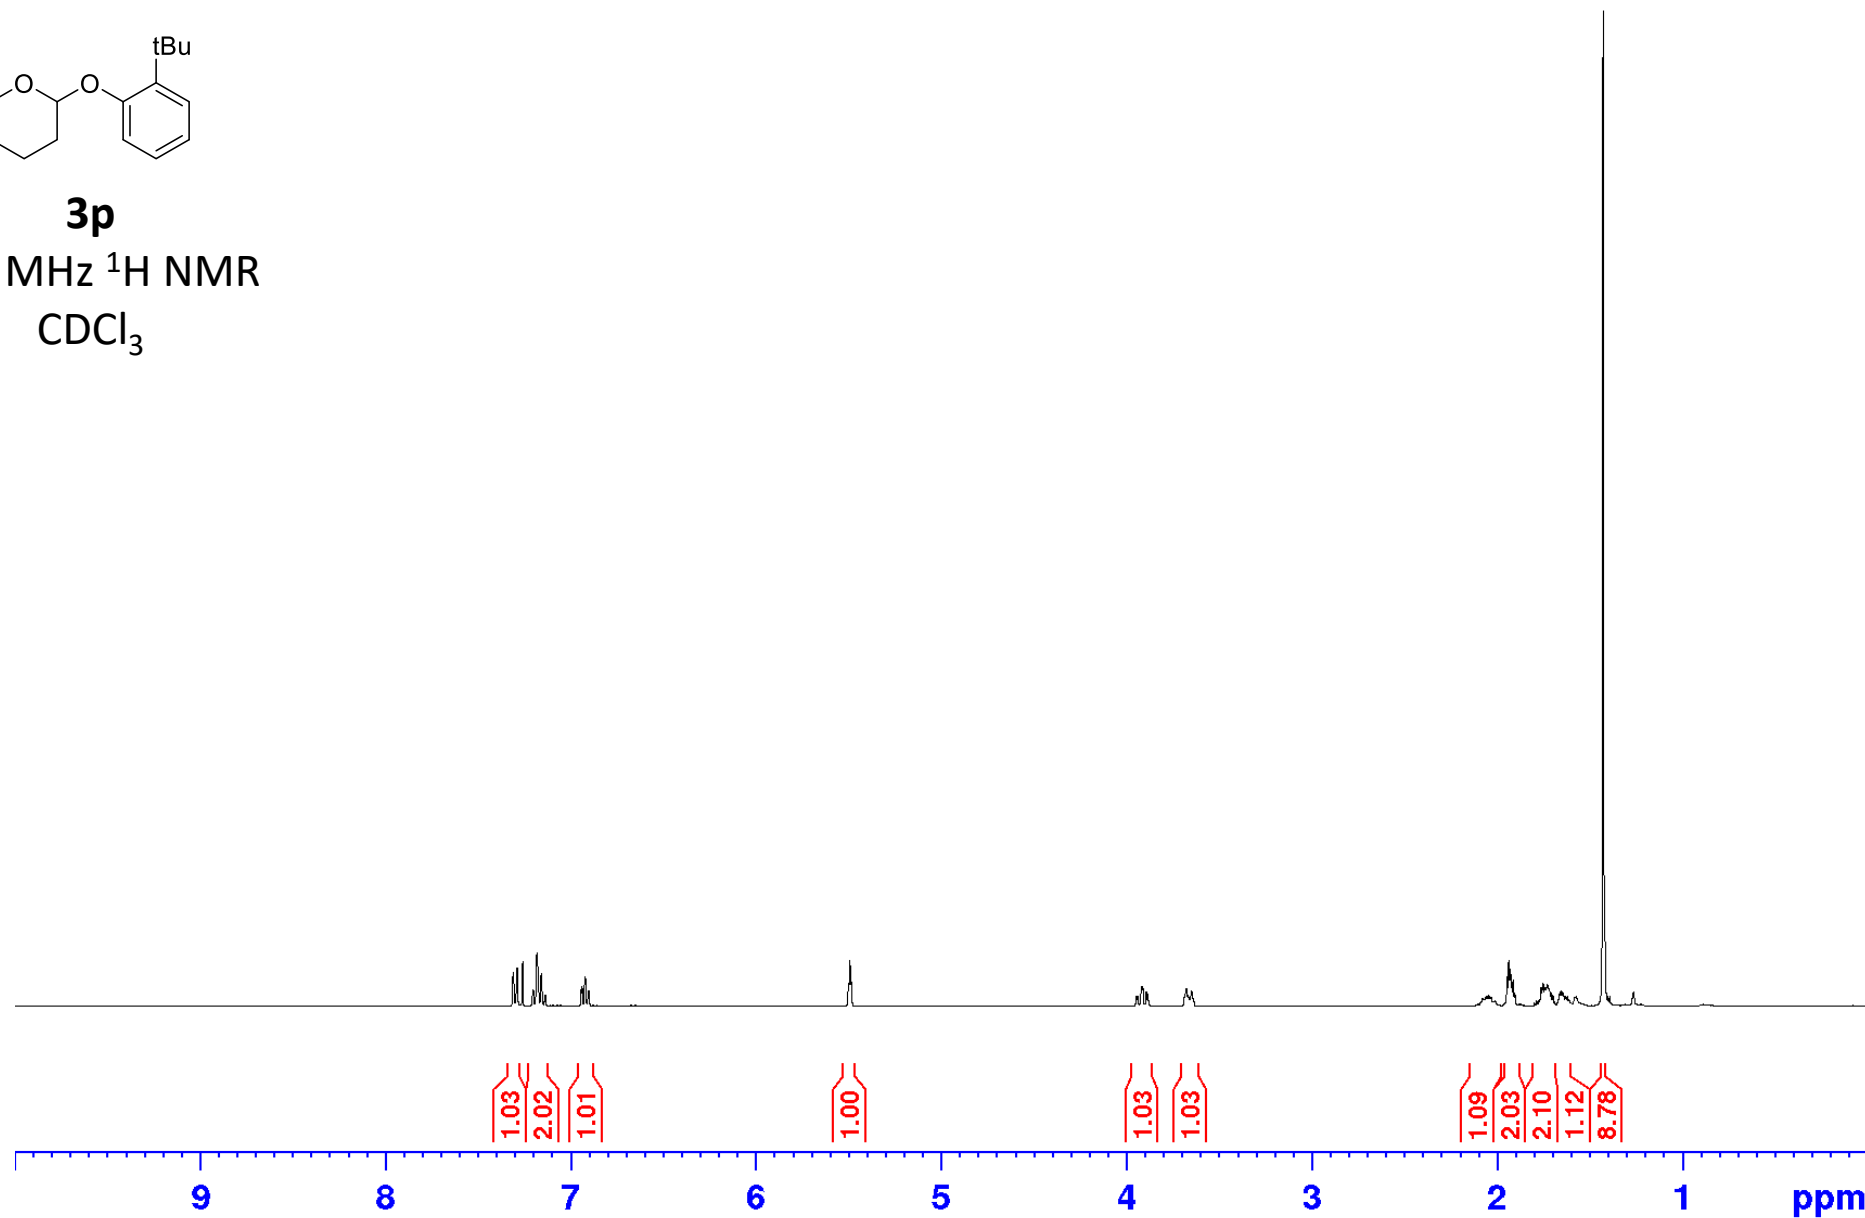

```

Current Data Parameters
NAME      Andy-1-180-2-isl-20220818
EXPNO    2
PROCNO   1

F2 - Acquisition Parameters
Date_    20220818
Time     14.40 h
INSTRUM  spect
PROBHD   E108618_0257 {
PULPROG  zg30
TD       65536
SOLVENT  CDCl3
NS       16
DS       2
SWH      8012.820 Hz
FIDRES   0.244532 Hz
AQ       4.0894465 sec
RG       203
DW       62.400 usec
DE       6.50 usec
TE       295.9 K
D1       1.00000000 sec
TD0      1
SFO1     400.1324708 MHz
NUC1     1H
P1       15.00 usec
PLW1     12.50000000 W

F2 - Processing parameters
SI       65536
SF       400.1300098 MHz
WDW      EM
SSB      0
LB       0.30 Hz
GB       0
PC       1.00
  
```

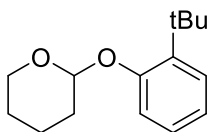

**3p**

100 MHz <sup>13</sup>C NMR  
CDCl<sub>3</sub>

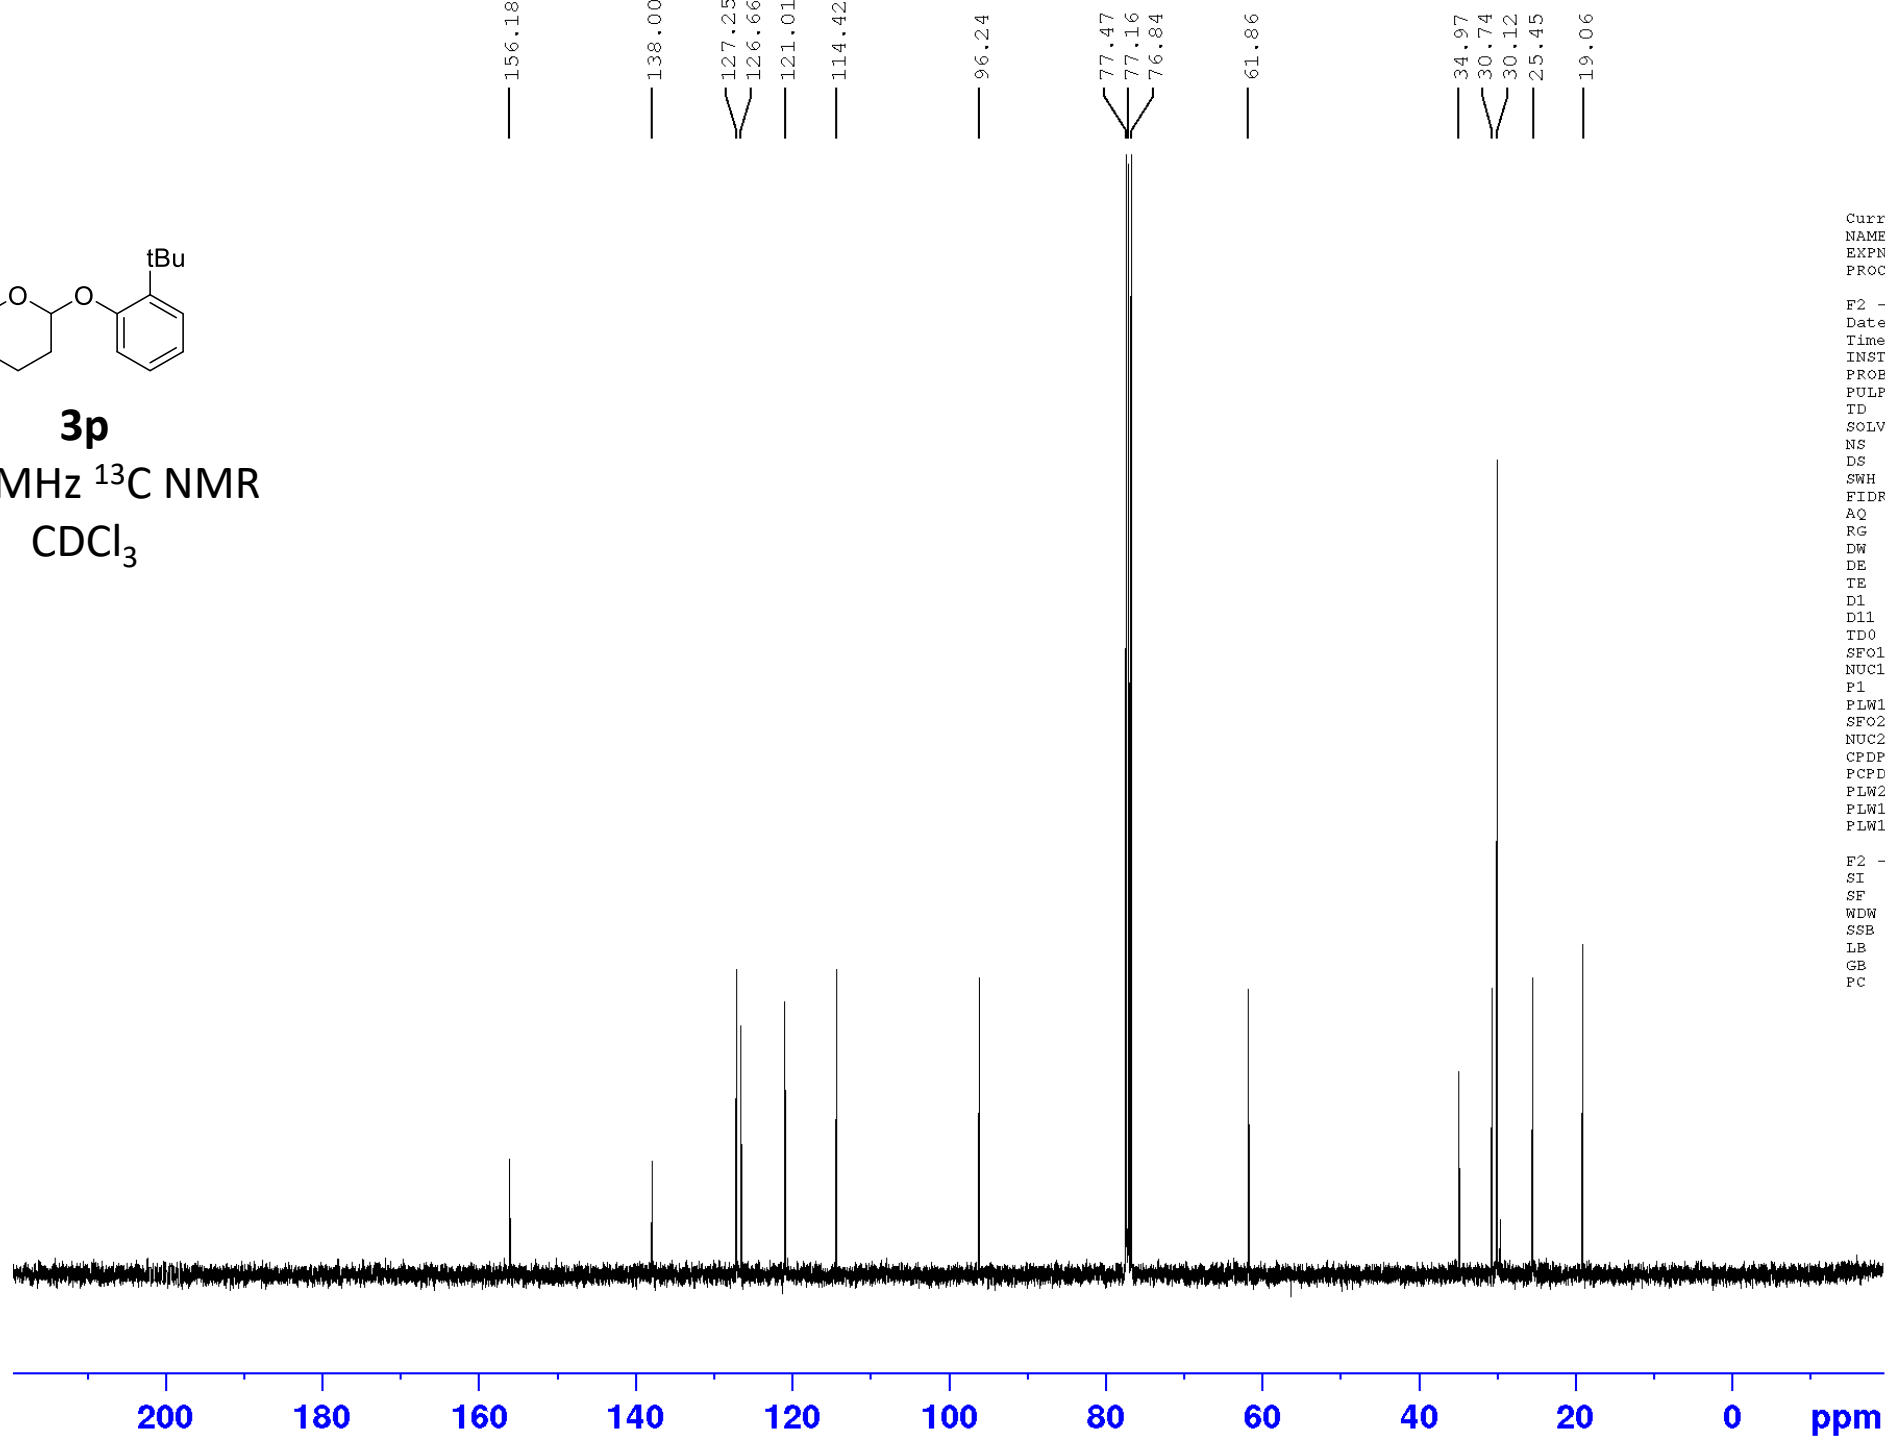

Current Data Parameters  
 NAME Andy-1-180-2-isl-20220818  
 EXPNO 3  
 PROCNO 1

F2 - Acquisition Parameters  
 Date\_ 20220818  
 Time 14.54 h  
 INSTRUM spect  
 PROBHD Z108618\_0257 (  
 PULPROG zgpg30  
 TD 65536  
 SOLVENT CDCl3  
 NS 200  
 DS 4  
 SWH 24038.461 Hz  
 FIDRES 0.733596 Hz  
 AQ 1.3631488 sec  
 RG 203  
 DW 20.800 usec  
 DE 6.50 usec  
 TE 296.6 K  
 D1 2.0000000 sec  
 D11 0.0300000 sec  
 TD0 1  
 SFO1 100.6228298 MHz  
 NUC1 13C  
 P1 10.00 usec  
 PLW1 51.0000000 W  
 SFO2 400.1316005 MHz  
 NUC2 1H  
 CPDPRG[2] waltz16  
 PCPD2 90.00 usec  
 PLW2 12.5000000 W  
 PLW12 0.34722000 W  
 PLW13 0.17465000 W

F2 - Processing parameters  
 SI 32768  
 SF 100.6127560 MHz  
 WDW EM  
 SSB 0  
 LB 1.00 Hz  
 GB 0  
 PC 1.40

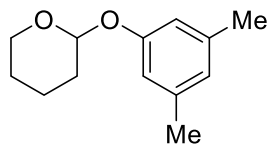

**3q**  
500 MHz <sup>1</sup>H NMR  
CDCl<sub>3</sub>

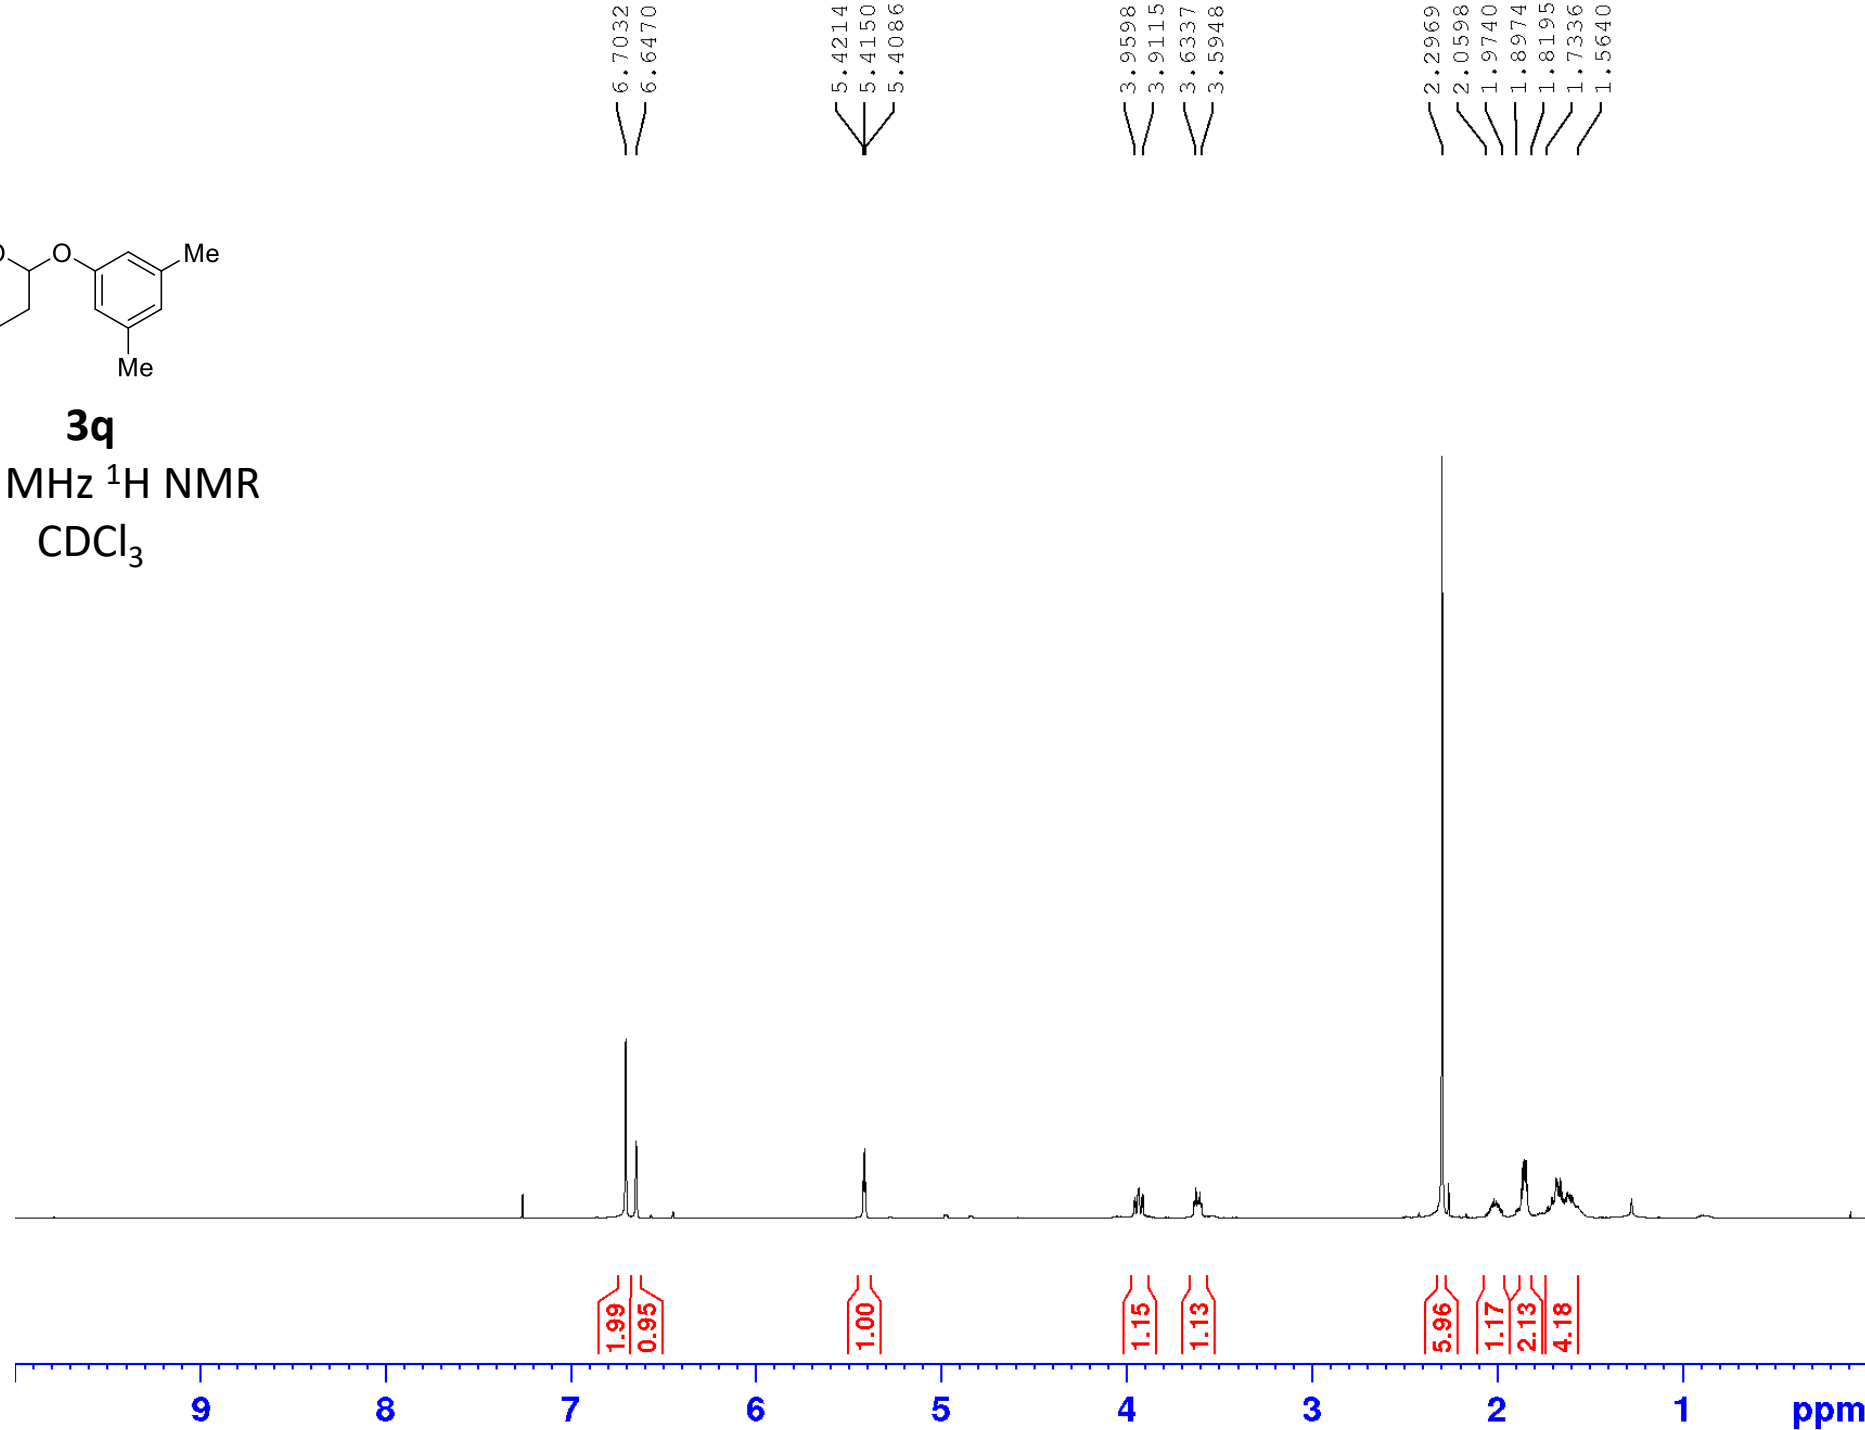

Current Data Parameters  
NAME vinn-4-139-9-isl-20210111  
EXPNO 1  
PROCNO 1

F2 - Acquisition Parameters  
Date\_ 20210111  
Time 18.58 h  
INSTRUM spect  
PROBHD z119470\_0283 {  
PULPROG zg30  
TD 65536  
SOLVENT cdcl3  
NS 16  
DS 2  
SWH 10000.000 Hz  
FIDRES 0.305176 Hz  
AQ 3.2767999 sec  
RG 30.85  
DW 50.000 usec  
DE 6.50 usec  
TE 295.1 K  
D1 1.00000000 sec  
TD0 1  
SFO1 500.1330883 MHz  
NUC1 1H  
P1 10.91 usec  
PLW1 25.00000000 W

F2 - Processing parameters  
SI 65536  
SF 500.1300125 MHz  
WDW EM  
SSB 0  
LB 0.30 Hz  
GB 0  
PC 1.00

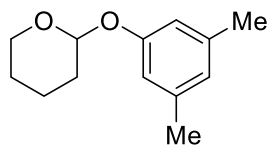

**3q**

125 MHz <sup>13</sup>C NMR  
CDCl<sub>3</sub>

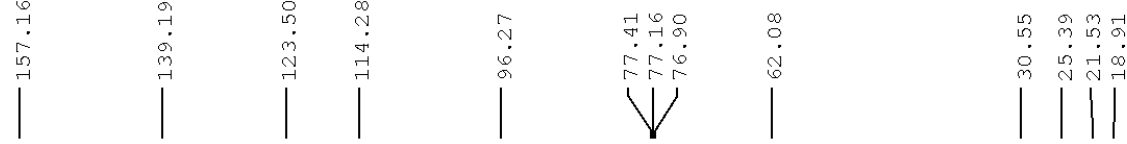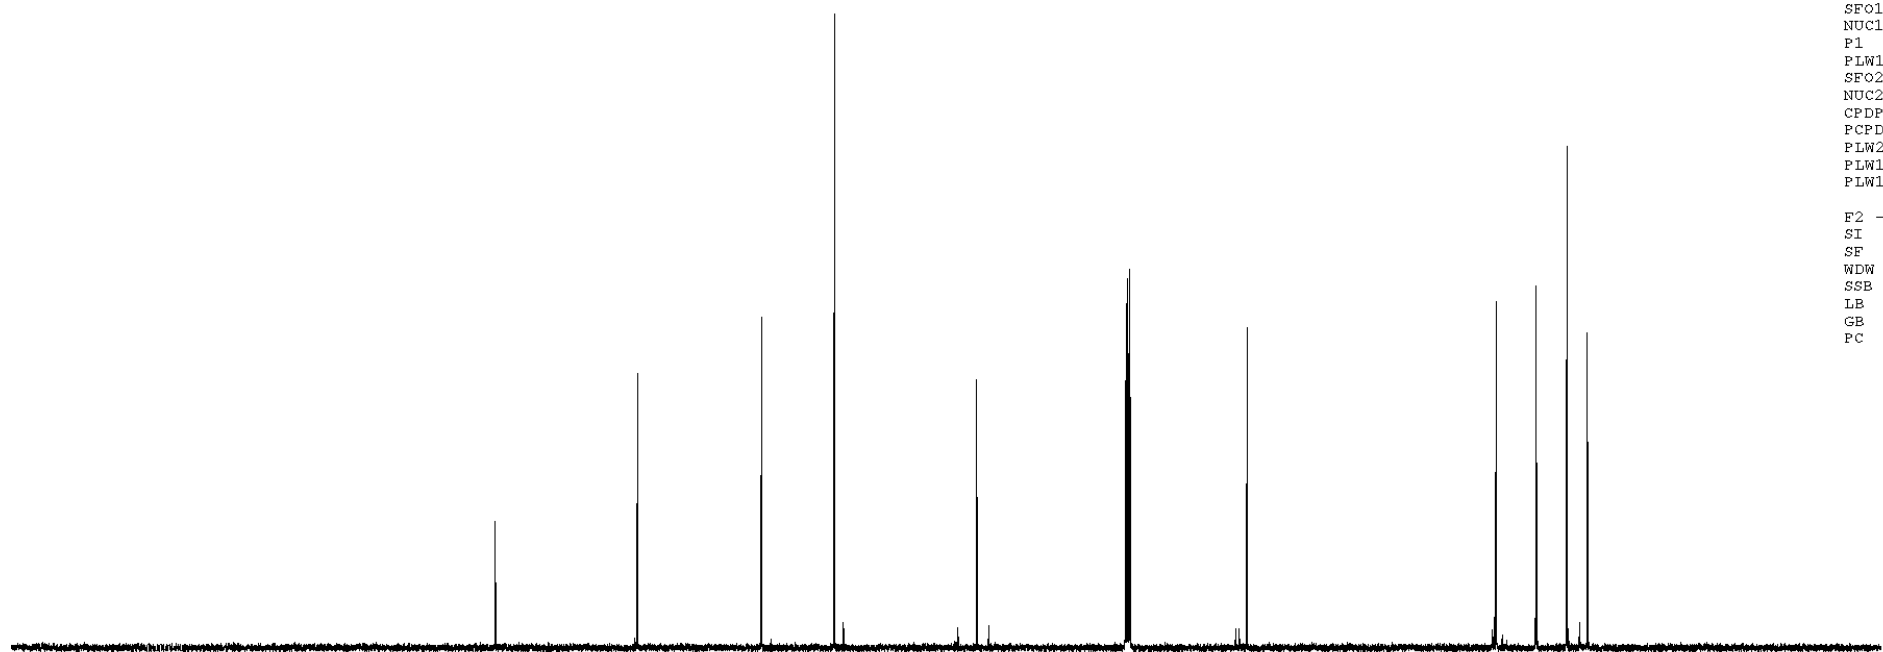

```

Current Data Parameters
NAME      vinn-4-139-9-islt-20210111
EXPNO    2
PROCNO   1

F2 - Acquisition Parameters
Date_    20210111
Time     19.03 h
INSTRUM  spect
PROBHD   Z119470_0283 (
PULPROG  zgpg30
TD       65536
SOLVENT  CDCl3
NS       100
DS       4
SWH      29761.904 Hz
FIDRES   0.908261 Hz
AQ       1.1010048 sec
RG       206.72
DW       16.800 usec
DE       6.50 usec
TE       295.1 K
D1       2.0000000 sec
D11      0.03000000 sec
TD0      1
SFO1     125.7703643 MHz
NUC1     13C
P1       9.75 usec
PLW1     94.0000000 W
SFO2     500.1320005 MHz
NUC2     1H
CPDPRG[2] waltz16
PCPD2    80.00 usec
PLW2     25.0000000 W
PLW12    0.46495000 W
PLW13    0.23387000 W

F2 - Processing parameters
SI       32768
SF       125.7577784 MHz
WDW      EM
SSB      0
LB       1.00 Hz
GB       0
PC       1.40

```

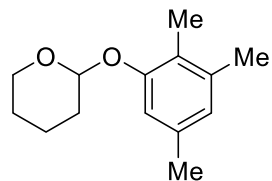

**3r**

500 MHz <sup>1</sup>H NMR  
CDCl<sub>3</sub>

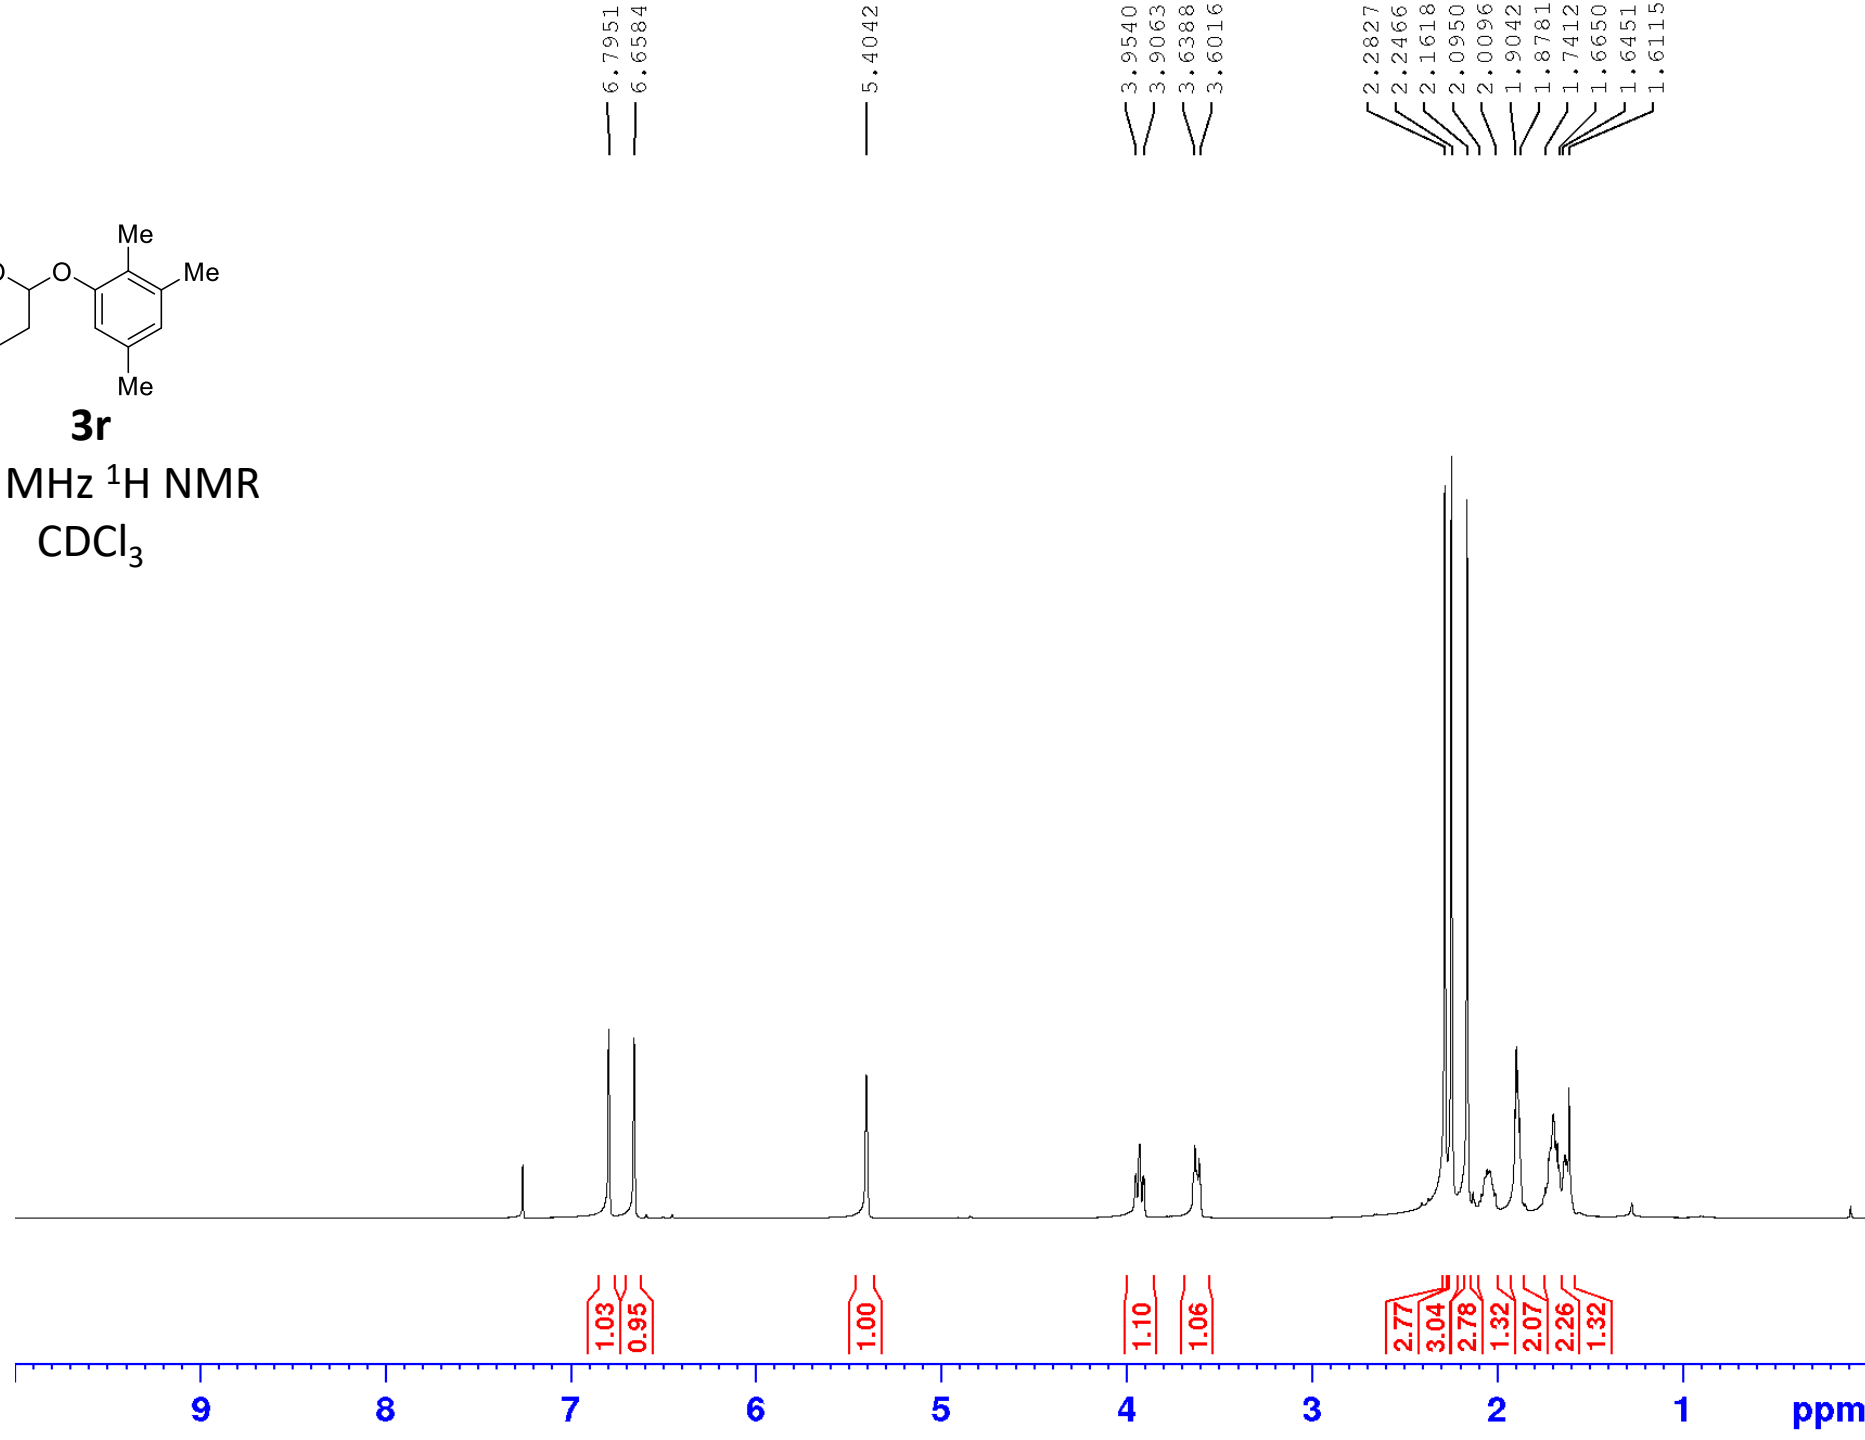

Current Data Parameters  
NAME vinn-4-139-10-islt2-20200120  
EXPNO 1  
PROCNO 1

F2 - Acquisition Parameters

Date\_ 20210121  
Time 8.02 h  
INSTRUM spect  
PROBHD E119470\_0283 (   
PULPROG zg30  
TD 65536  
SOLVENT CDCl3  
NS 16  
DS 2  
SWH 10000.000 Hz  
FIDRES 0.305176 Hz  
AQ 3.2767999 sec  
RG 50.6  
DW 50.000 usec  
DE 6.50 usec  
TE 295.1 K  
D1 1.00000000 sec  
TD0 1  
SFO1 500.1330883 MHz  
NUC1 1H  
P1 10.91 usec  
PLW1 25.00000000 W

F2 - Processing parameters

SI 65536  
SF 500.1300128 MHz  
WDW EM  
SSB 0  
LB 0.30 Hz  
GB 0  
PC 1.00

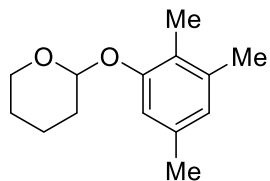

**3r**

125 MHz <sup>13</sup>C NMR  
CDCl<sub>3</sub>

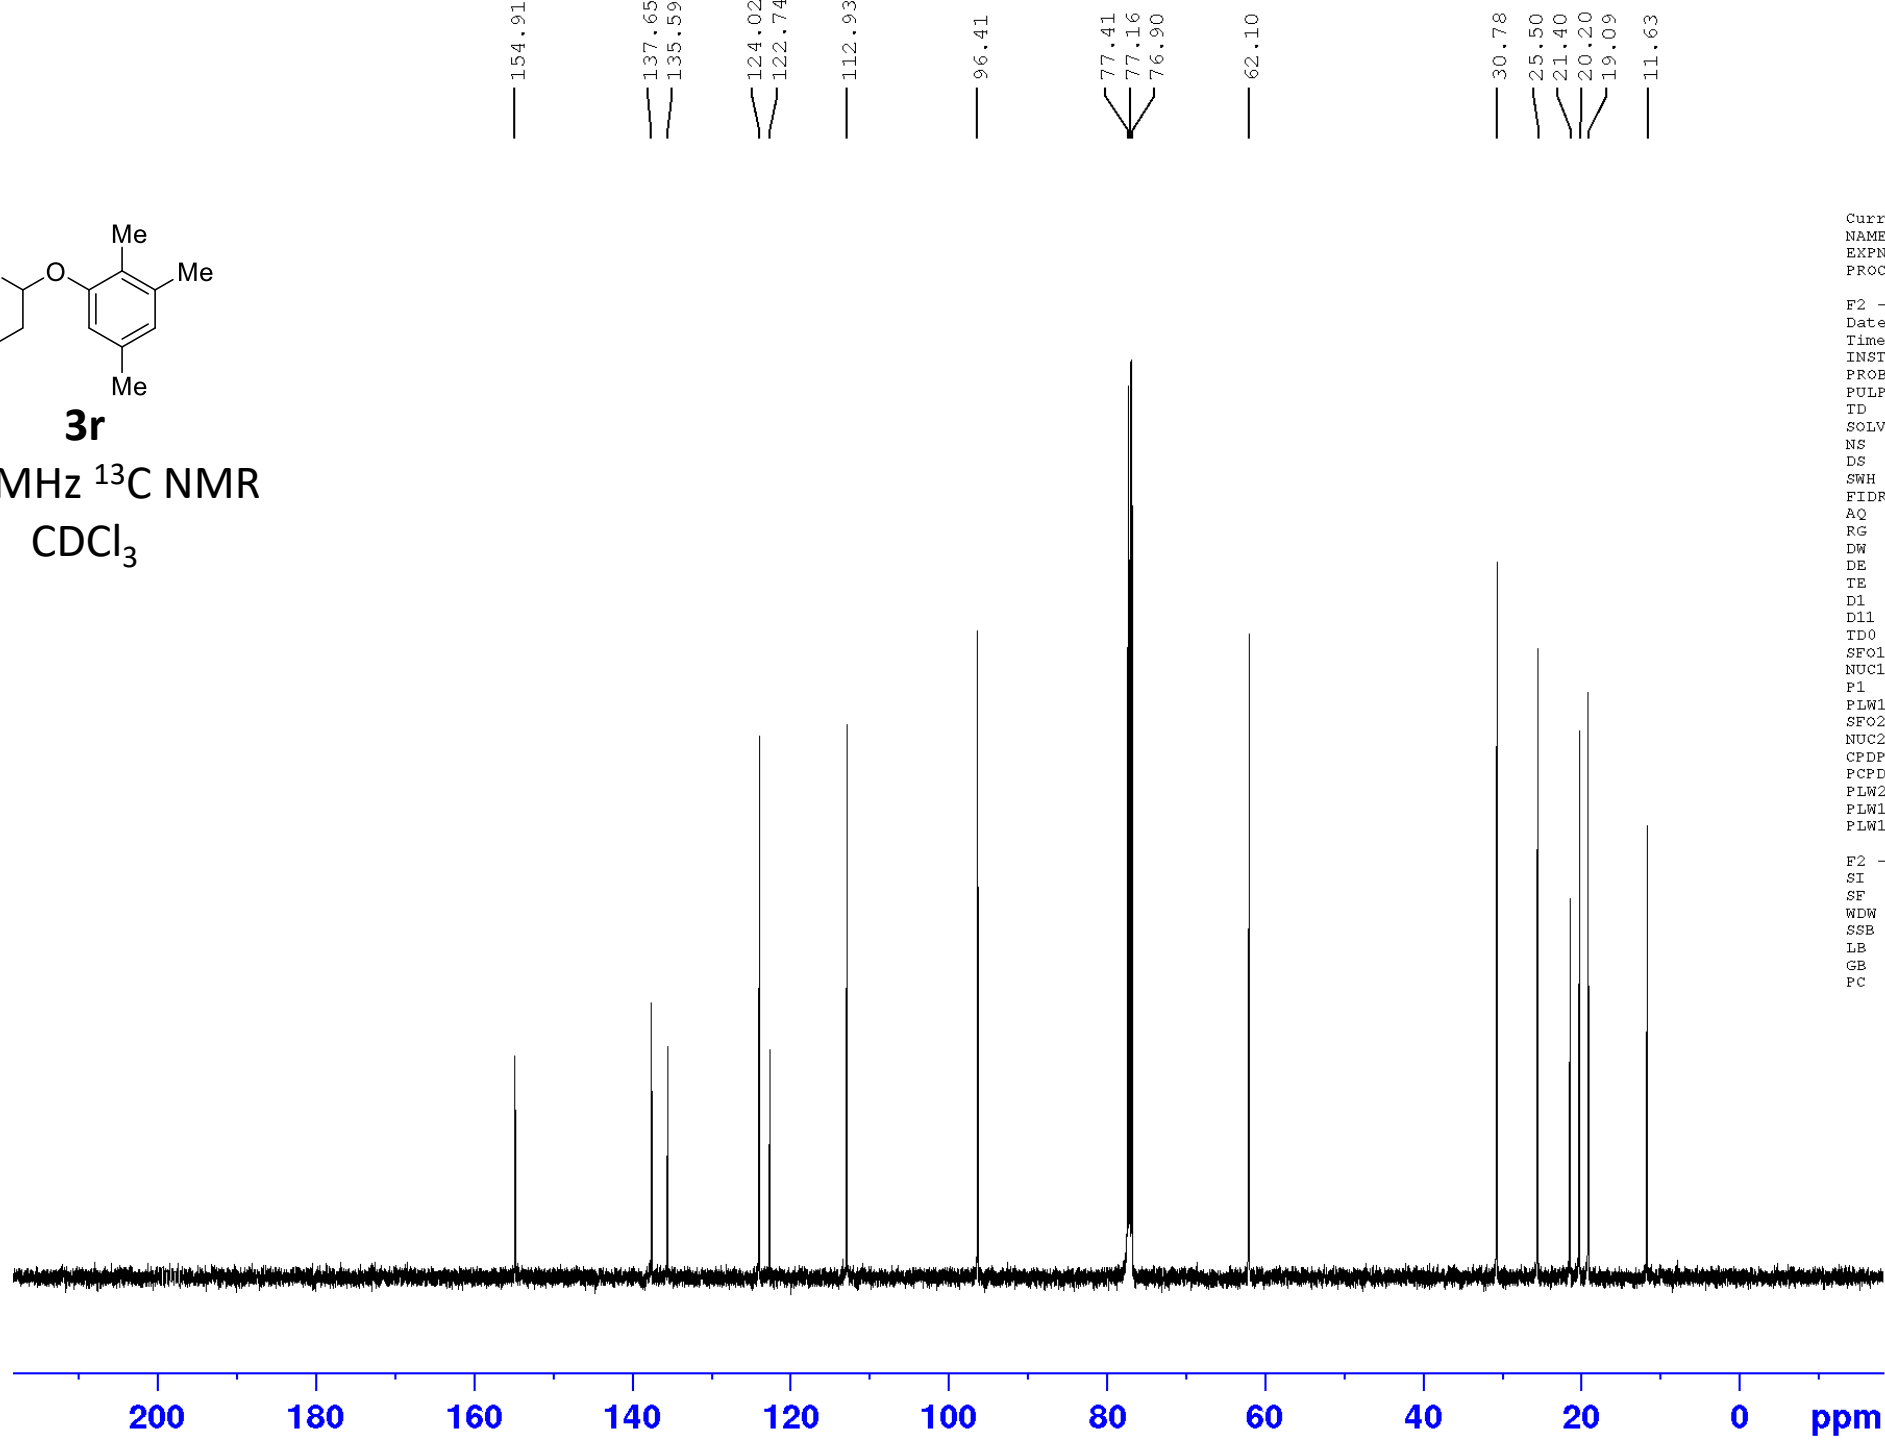

Current Data Parameters  
 NAME vinn-4-139-10-islt2-20200120  
 EXPNO 2  
 PROCNO 1

F2 - Acquisition Parameters  
 Date\_ 20210121  
 Time 8.16 h  
 INSTRUM spect  
 PROBHD Z119470\_0283 ( )  
 PULPROG zgpg30  
 TD 65536  
 SOLVENT CDCl3  
 NS 256  
 DS 4  
 SWH 29761.904 Hz  
 FIDRES 0.908261 Hz  
 AQ 1.1010048 sec  
 RG 206.72  
 DW 16.800 usec  
 DE 6.50 usec  
 TE 295.2 K  
 D1 2.0000000 sec  
 D11 0.0300000 sec  
 TD0 1  
 SFO1 125.7703643 MHz  
 NUC1 13C  
 P1 9.75 usec  
 PLW1 94.0000000 W  
 SFO2 500.1320005 MHz  
 NUC2 1H  
 CPDPRG[2] waltz16  
 PCPD2 80.00 usec  
 PLW2 25.0000000 W  
 PLW12 0.46495000 W  
 PLW13 0.23387000 W

F2 - Processing parameters  
 SI 32768  
 SF 125.7577766 MHz  
 WDW EM  
 SSB 0  
 LB 1.00 Hz  
 GB 0  
 PC 1.40

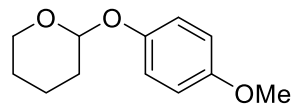

**3s**

500 MHz <sup>1</sup>H NMR  
CDCl<sub>3</sub>

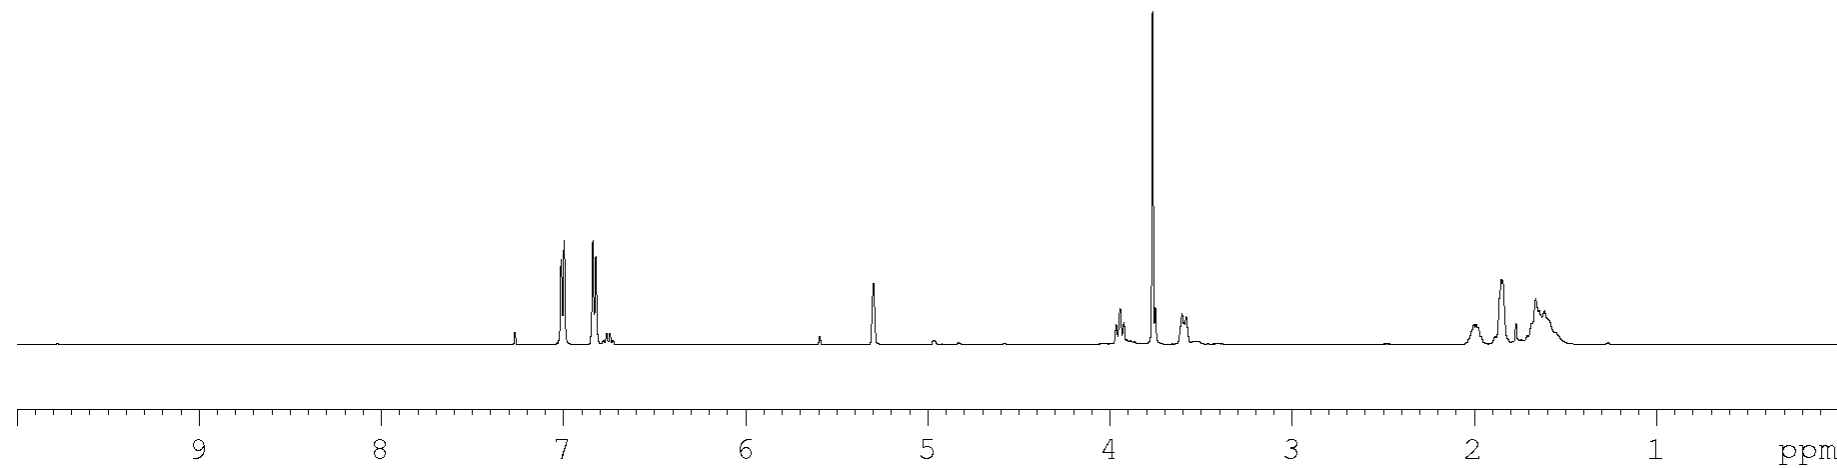

7.006  
6.990  
6.832  
6.817  
— 5.296  
3.964  
3.942  
3.923  
3.765  
3.603  
3.593  
3.581  
2.030  
1.959  
1.882  
1.817  
1.708  
1.549

2.02  
2.03  
1.00  
1.07  
3.01  
1.13  
1.13  
2.27  
3.68

```

Current Data Parameters
NAME      vinn-4-139-5-2-ialt-20201216
EXPNO     1
PROCNO    1

F2 - Acquisition Parameters
Date_     20201216
Time      19.13 h
INSTRUM   spect
PROBHD    z119470_0233 (
PULPROG   zg30
TD         65536
SOLVENT   CDCl3
NS         16
DS         2
SWH        10000.000 Hz
FIDRES     0.305176 Hz
AQ         3.2767999 sec
RG         30.85
DW         50.000 usec
DE         6.50 usec
TE         295.1 K
D1         1.00000000 sec
TD0
SFO1      500.1330883 MHz
NUC1       1H
P1         10.91 usec
PLW1       25.00000000 W

F2 - Processing parameters
SI         65536
SF         500.1300121 MHz
WDW        EM
SSB        0
LB         0.30 Hz
GB         0
PC         1.00
  
```

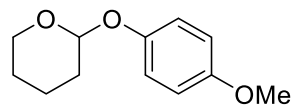

**3s**

125 MHz <sup>13</sup>C NMR  
CDCl<sub>3</sub>

154.584  
151.174  
117.870  
114.577  
97.406  
77.412  
77.157  
76.903  
62.171  
55.727  
30.579  
25.344  
19.019

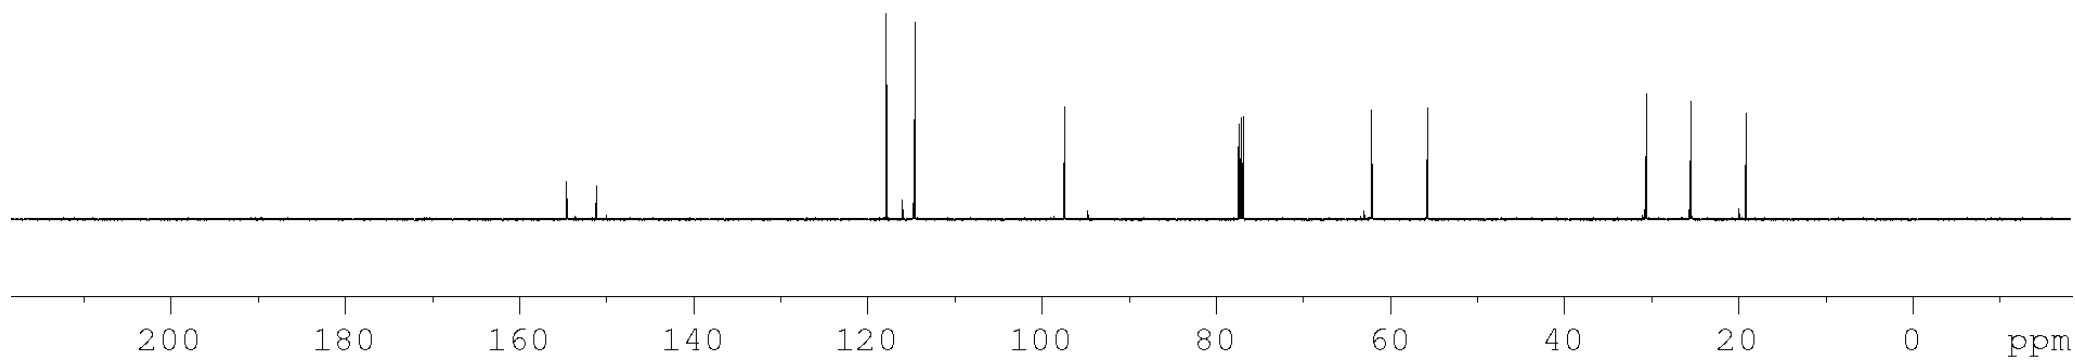

```

Current Data Parameters
NAME      vinn-4-139-5-2-isl-20201216
EKFN0     2
PROCNO    1

F2 - Acquisition Parameters
Date_     20201216
Time      19.18 h
INSTRUM   spect
PROBHD    E119470_0283 {
FULPROG   zgpg30
TD         65536
SOLVENT   CDCl3
NS         100
DS         4
SWH       29761.904 Hz
FIDRES    0.908261 Hz
AQ         1.1010048 sec
RG         206.72
DW         16.800 usec
DE         6.50 usec
TE         295.2 K
D1         2.00000000 sec
D11        0.03000000 sec
TD0        1
SFO1      125.7703643 MHz
NUC1       13c
F1         9.75 usec
PLW1      94.00000000 W
SFO2      500.1320005 MHz
NUC2       1H
CPDPRG[2] waltz16
PCPD2     80.00 usec
PLW2      25.00000000 W
PLW12     0.46495000 W
PLW13     0.23387000 W

F2 - Processing parameters
SI         32768
SF         125.7577799 MHz
WDW        EM
SSB        0
LB         1.00 Hz
GB         0
PC         1.40

```



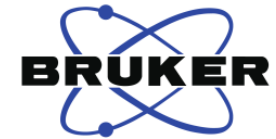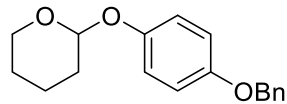

**3t**

500 MHz <sup>1</sup>H NMR  
CDCl<sub>3</sub>

7.4512  
7.3190  
7.0248  
7.0068  
6.9279  
6.9100  
5.3242  
5.3180  
5.3120  
5.0311  
3.9821  
3.9350  
3.6283  
3.5906  
2.0463  
1.9757  
1.9012  
1.8323  
1.7241  
1.5976

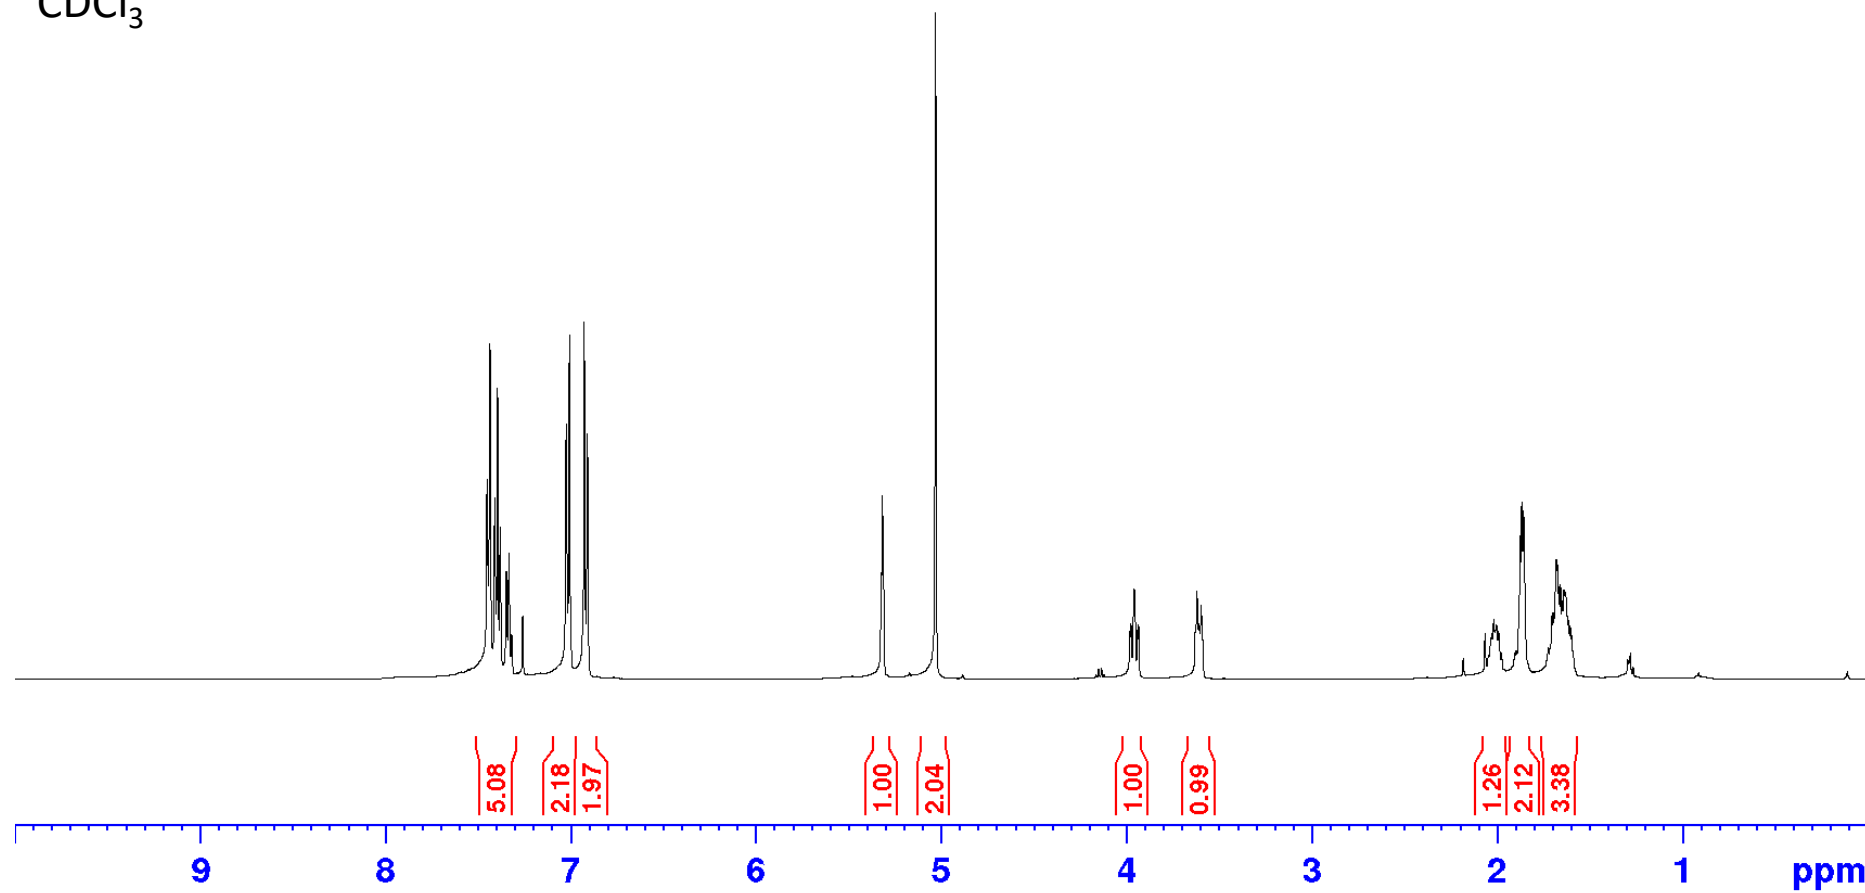

Current Data Parameters  
NAME winn-4-139-6-2-1s1t2-20200120  
EXPNO 1  
PROCNO 1  
F2 - Acquisition Parameters  
Date\_ 20210121  
Time 9.35 h  
INSTRUM spect  
PROBHD Z119470\_0283 (   
PULPROG zg30  
TD 65536  
SOLVENT CDCl3  
NS 16  
DS 2  
SWH 10000.000 Hz  
FIDRES 0.305176 Hz  
AQ 3.2767999 sec  
RG 30.85  
DW 50.000 usec  
DE 6.50 usec  
TE 295.1 K  
D1 1.00000000 sec  
TD0 1  
SFO1 500.1330883 MHz  
NUC1 1H  
F1 10.91 usec  
PLW1 25.00000000 W  
F2 - Processing parameters  
SI 65536  
SF 500.1300127 MHz  
MDW EM  
SSB 0  
LB 0.30 Hz  
GB 0  
PC 1.00

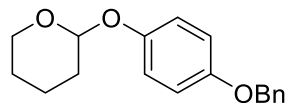

**3t**

125 MHz <sup>13</sup>C NMR  
CDCl<sub>3</sub>

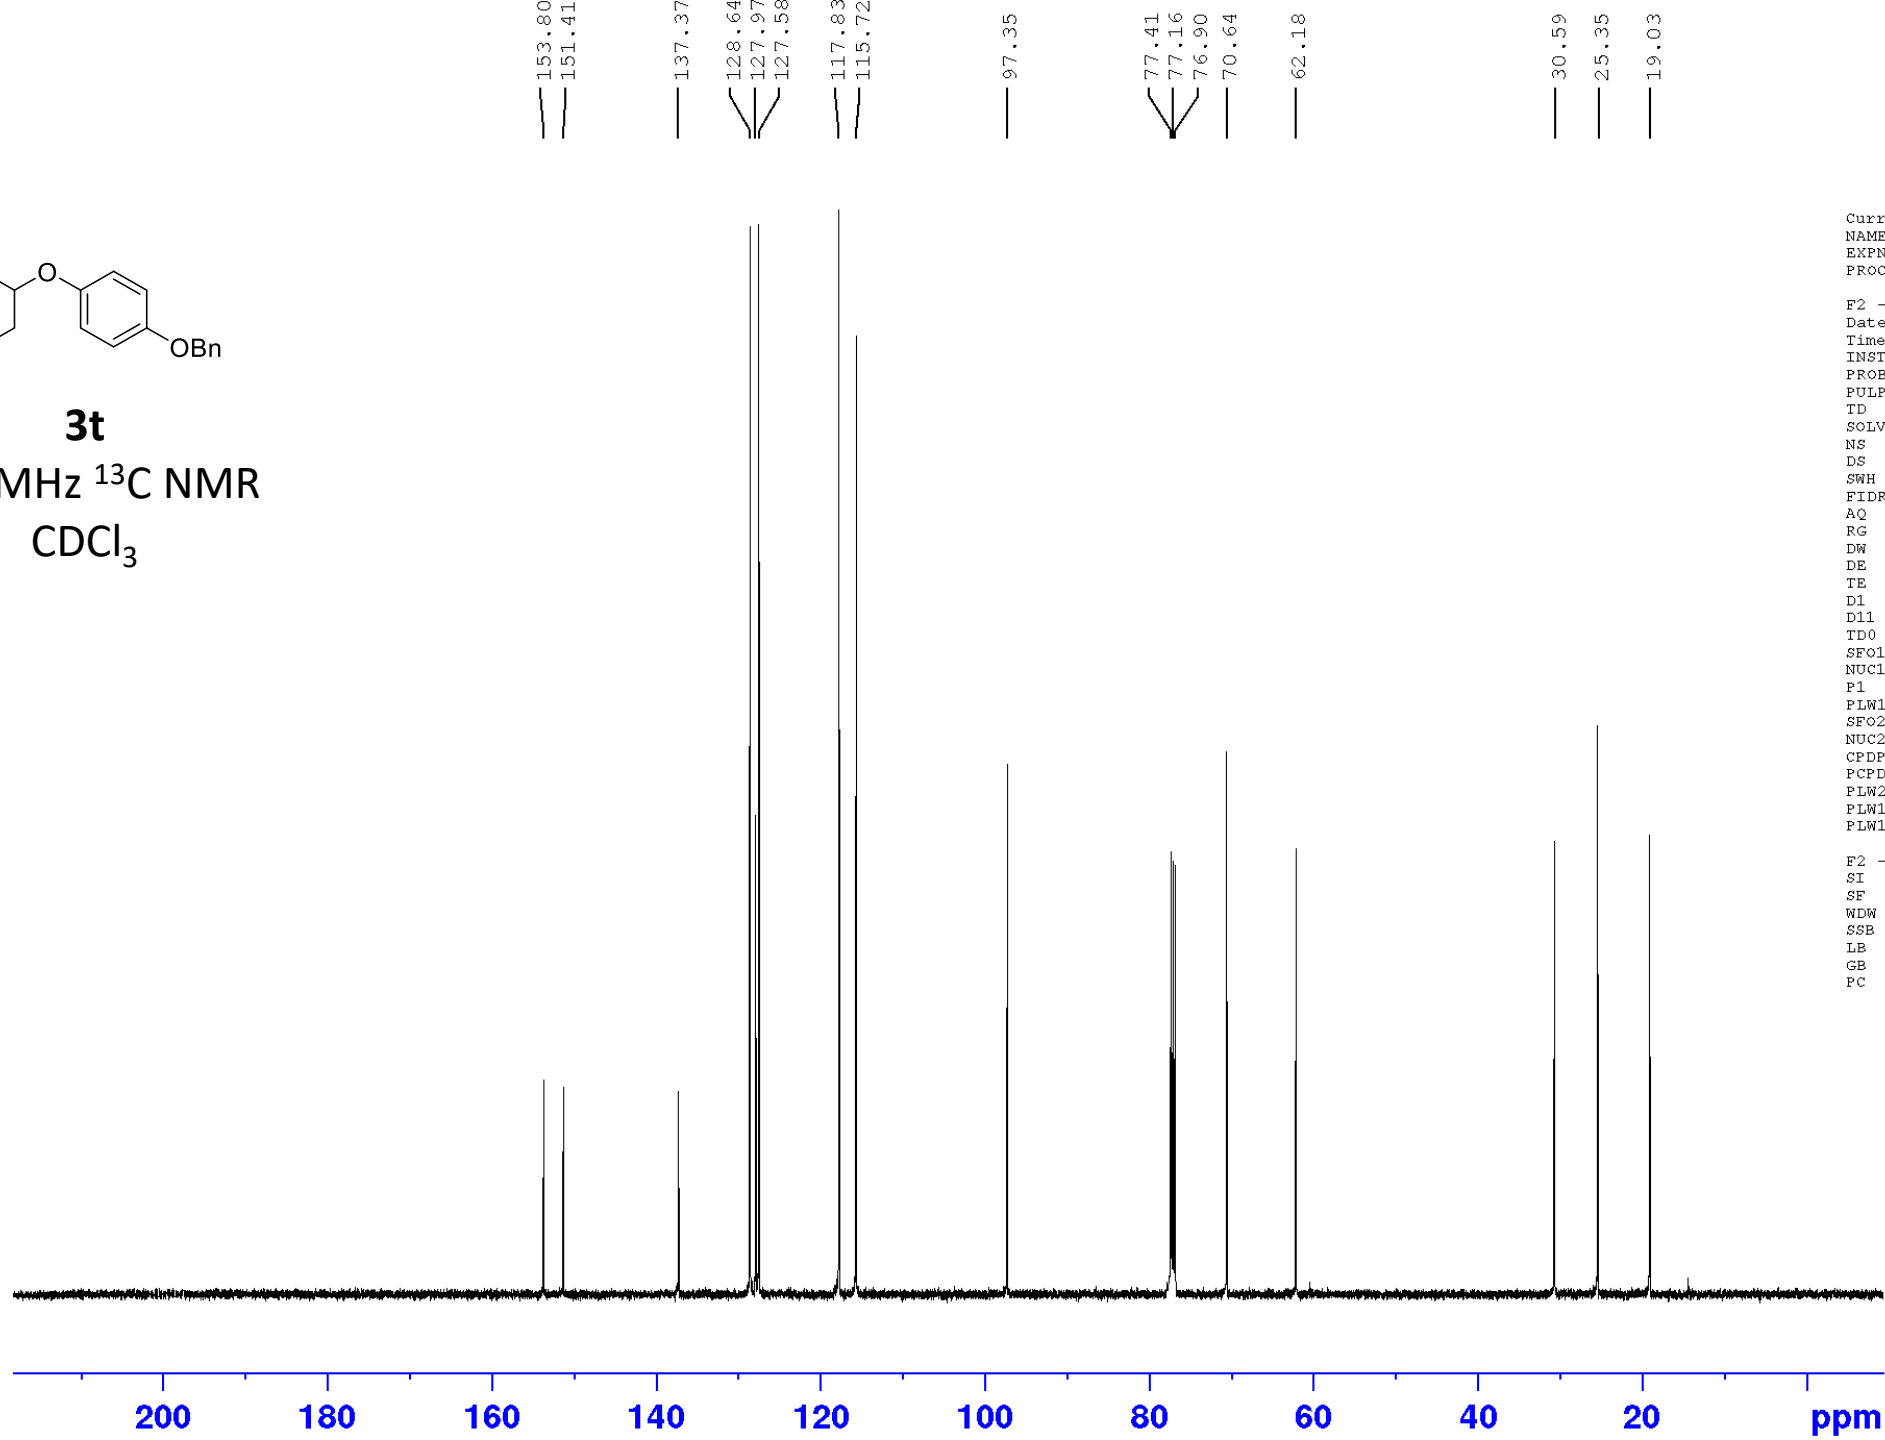

Current Data Parameters  
NAME vinn-4-139-6-2-islt2-2020012  
EXPNO 2  
PROCNO 1

F2 - Acquisition Parameters  
Date\_ 20210121  
Time 9.50 h  
INSTRUM spect  
PROBHD Z119470\_0283 (  
PULPROG zgpg30  
TD 65536  
SOLVENT CDCl3  
NS 256  
DS 4  
SWH 29761.904 Hz  
FIDRES 0.908261 Hz  
AQ 1.1010048 sec  
RG 206.72  
DW 16.800 usec  
DE 6.50 usec  
TE 295.2 K  
D1 2.0000000 sec  
D11 0.0300000 sec  
TD0 1  
SFO1 125.7703643 MHz  
NUC1 13C  
P1 9.75 usec  
PLW1 94.0000000 W  
SFO2 500.1320005 MHz  
NUC2 1H  
CPDPRG[2] waltz16  
PCPD2 80.00 usec  
PLW2 25.0000000 W  
PLW12 0.46495000 W  
PLW13 0.23387000 W

F2 - Processing parameters  
SI 32768  
SF 125.7577812 MHz  
WDW EM  
SSB 0  
LB 1.00 Hz  
GB 0  
PC 1.40

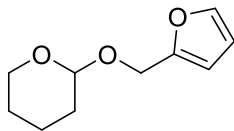

**3u**

500 MHz <sup>1</sup>H NMR  
CDCl<sub>3</sub>

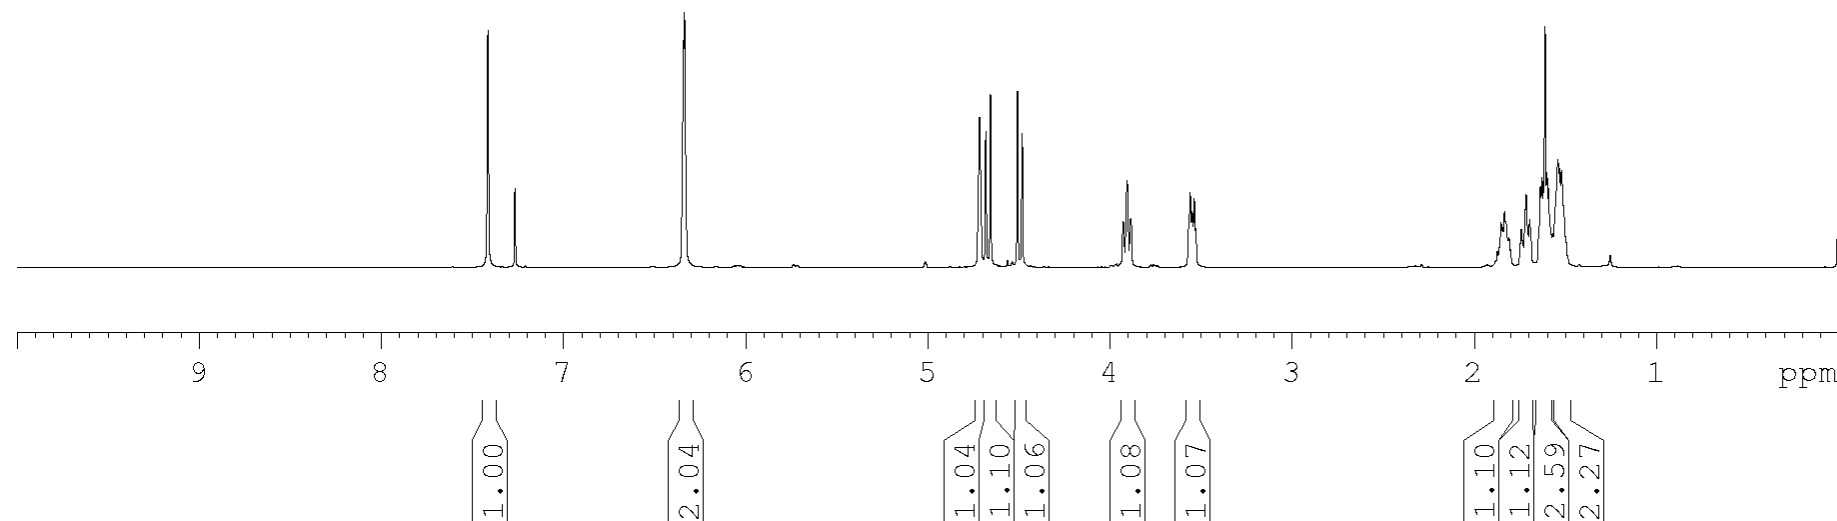

7.409  
7.260  
6.335  
6.330  
4.715  
4.680  
4.654  
4.506  
4.480  
3.925  
3.905  
3.884  
3.567  
3.558  
3.548  
3.536  
3.528  
1.871  
1.800  
1.740  
1.693  
1.635  
1.591  
1.539  
1.519

```

Current Data Parameters
NAME      vinn-7-105-1-ialt-20230807
EXPNO     1
PROCNO    1

F2 - Acquisition Parameters
Date_     20230807
Time      17.34 h
INSTRUM   spect
PROBHD    zg30
PULPROG   zg30
TD         65536
SOLVENT   CDCl3
NS         16
DS         2
SWH        10000.000 Hz
FIDRES     0.305176 Hz
AQ         3.2767999 sec
RG         30.85
DW          50.000 usec
DE          10.000 usec
TE          296.2 K
D1          1.00000000 sec
TD0         1
SFO1       500.1330883 MHz
NUC1       1H
P1          11.25 usec
PLW1       17.35199928 W

F2 - Processing parameters
SI          65536
SF          500.1300130 MHz
WDW         EM
SSB         0
LB          0.30 Hz
GB          0
PC          1.00
  
```

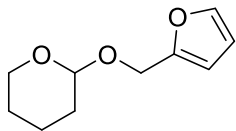

**3u**

125 MHz <sup>13</sup>C NMR  
CDCl<sub>3</sub>

— 151.855  
— 142.938  
  
 < 110.371  
 < 109.403  
 — 97.412  
 < 77.411  
 < 77.157  
 < 76.903  
 < 62.142  
 < 60.728  
  
 — 30.480  
 — 25.543  
 — 19.311

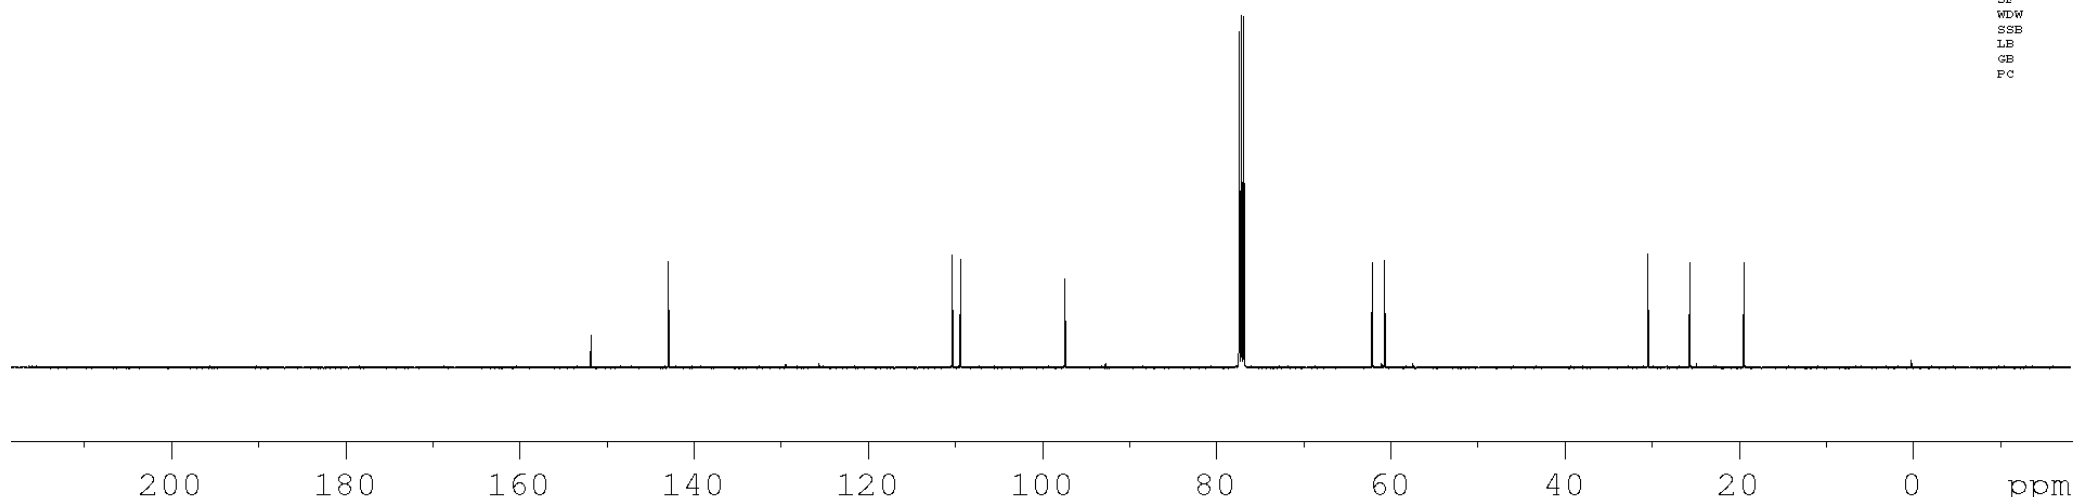

```

Current Data Parameters
NAME      vinn-7-105-1-ialt-20230807
EKFN0     2
PROCNO    1

F2 - Acquisition Parameters
Date_     20230807
Time      17.46 h
INSTRUM   aspect
PROBHD    Z149001_0010 {
FULPROG   zgpg30
TD         65536
SOLVENT    CDCl3
NS         200
DS         4
SWH        29761.904 Hz
FIDRES     0.908261 Hz
AQ         1.1010048 sec
RG         206.72
DW         16.800 usec
DE         18.00 usec
TE         296.1 K
D1         2.00000000 sec
D11        0.03000000 sec
TD0        1
SFO1       125.7703643 MHz
NUC1       13C
F1         10.00 usec
PLW1       61.00000000 W
SFO2       500.1320005 MHz
NUC2       1H
CPDPRG[2]  waltz16
PCPD2      80.00 usec
PLW2       17.35199928 W
PLW12      0.34314999 W
PLW13      0.17260000 W

F2 - Processing parameters
SI         32768
SF         125.7577735 MHz
WDW        EM
SSB        0
LB         1.00 Hz
GB         0
PC         1.40
  
```

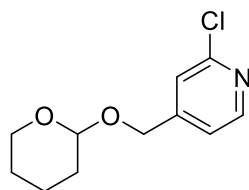

**3v**

400 MHz <sup>1</sup>H NMR  
CDCl<sub>3</sub>

8.362  
8.356  
7.675  
7.669  
7.655  
7.649  
7.310  
7.289  
7.260

4.772  
4.741  
4.696  
4.687  
4.679  
4.501  
4.469  
3.879  
3.822  
3.565  
3.511

1.866  
1.697  
1.661  
1.517

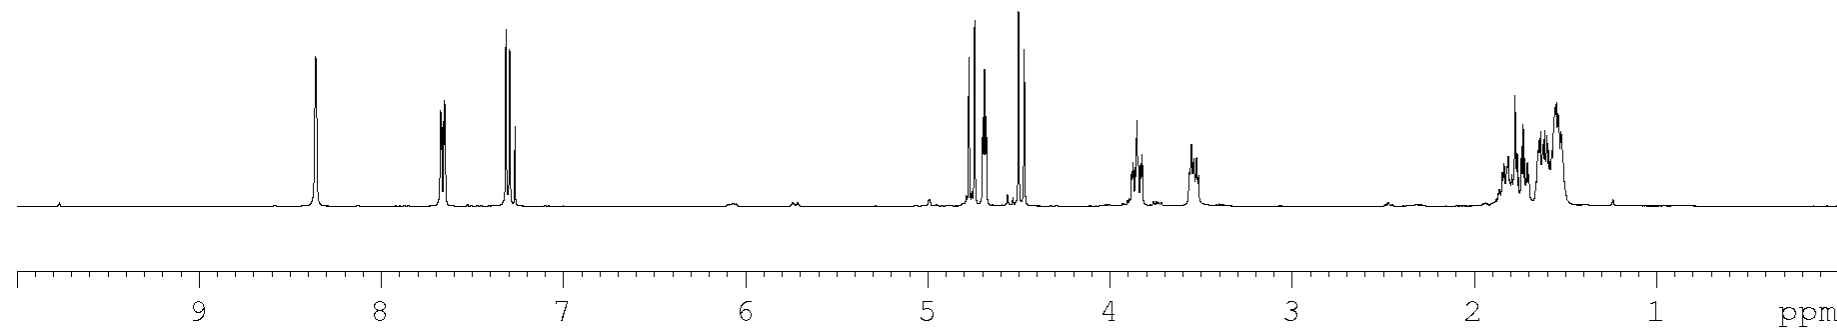

1.00

1.01

0.99

1.01

0.98

0.99

1.07

1.08

2.46

4.42

```

Current Data Parameters
NAME      vinn-7-110-1-ialt-20230810
EXPNO     1
PROCNO    1

F2 - Acquisition Parameters
Date_     20230810
Time      17.08 h
INSTRUM   spect
PROBHD    zg30
PULPROG   zg30
TD         65536
SOLVENT   CDCl3
NS         16
DS         2
SWH        8012.820 Hz
FIDRES     0.244532 Hz
AQ         4.0894465 sec
RG         101
DW         62.400 usec
DE         6.50 usec
TE         295.8 K
D1         1.00000000 sec
D10        1
SFO1      400.1324708 MHz
NUC1       1H
P1         15.00 usec
PLW1       12.50000000 W

F2 - Processing parameters
SI         65536
SF         400.1300097 MHz
WDW        EM
SSB        0
LB         0.30 Hz
GB         0
PC         1.00

```

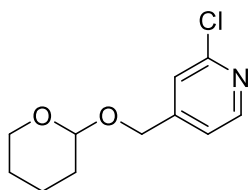

**3v**

100 MHz <sup>13</sup>C NMR  
CDCl<sub>3</sub>

150.712  
149.101  
138.469  
132.922  
124.136  
98.250  
77.473  
77.156  
76.838  
65.657  
62.388  
30.515  
25.428  
19.347

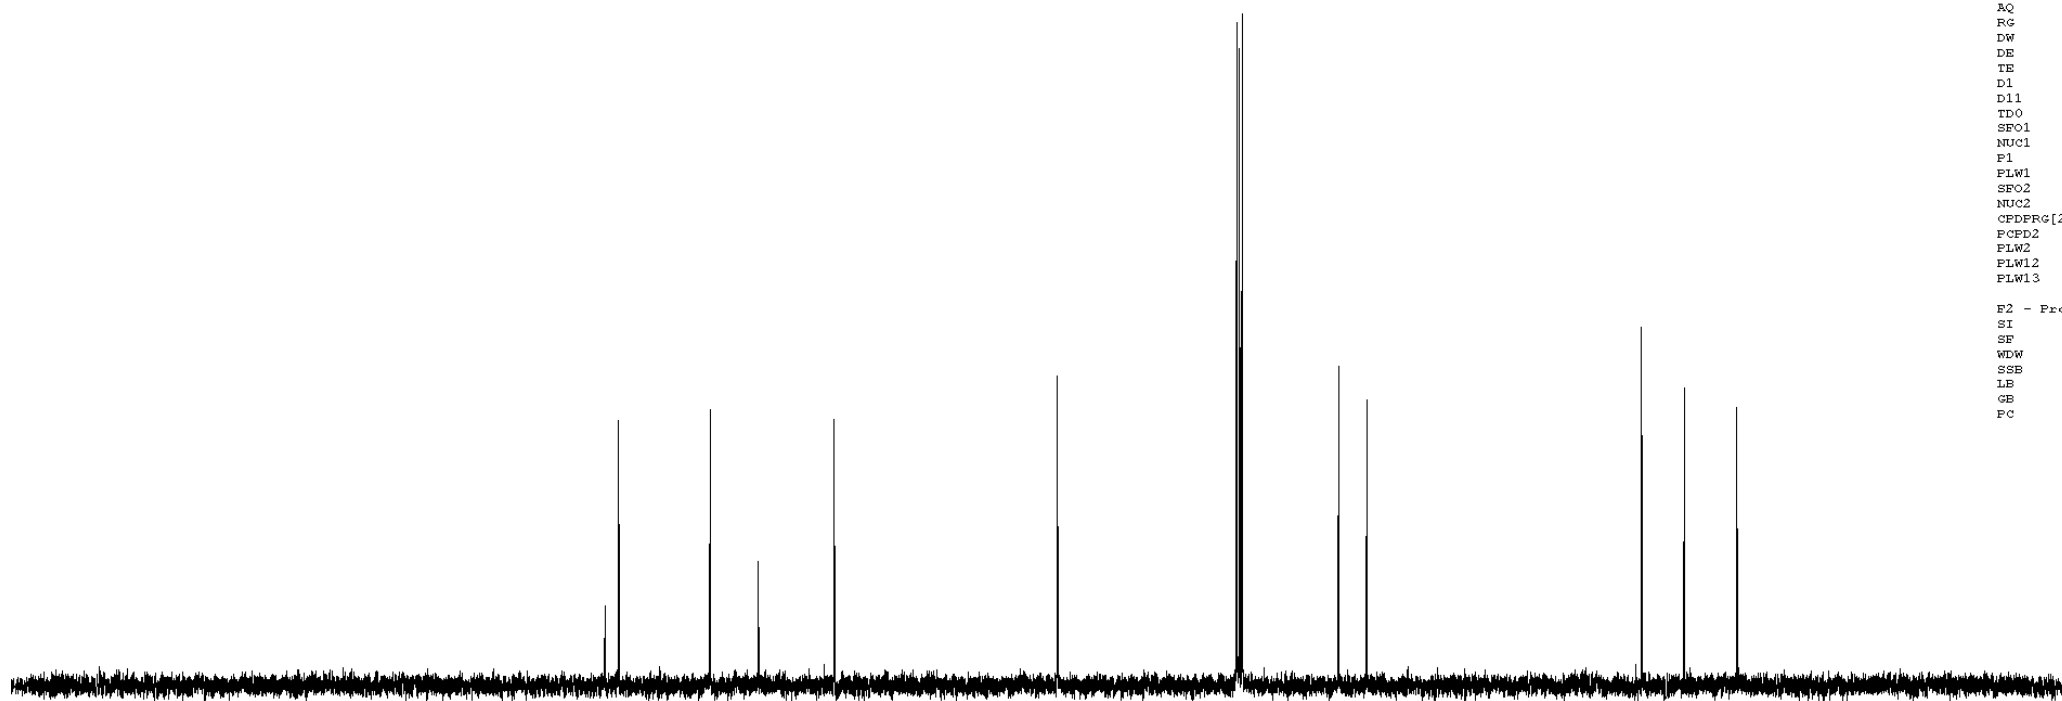

Current Data Parameters  
NAME vinn-7-110-1-ialt-20230810  
EKFNO 2  
PROCNO 1

F2 - Acquisition Parameters  
Date\_ 20230810  
Time 17.12 h  
INSTRUM spect  
PROBHD z108618\_0257 {  
PULPROG zgpg30  
TD 65536  
SOLVENT cdcl3  
NS 40  
DS 4  
SWH 24038.461 Hz  
FIDRES 0.733596 Hz  
AQ 1.3631488 sec  
RG 203  
DW 20.800 usec  
DE 6.50 usec  
TE 296.3 K  
D1 2.00000000 sec  
D11 0.03000000 sec  
TD0 1  
SFO1 100.6228298 MHz  
NUC1 13C  
F1 10.00 usec  
PLW1 51.00000000 W  
SFO2 400.1316005 MHz  
NUC2 1H  
CPDPRG[2] waltz16  
PCPD2 90.00 usec  
PLW2 12.50000000 W  
PLW12 0.34722000 W  
PLW13 0.17465000 W

F2 - Processing parameters  
SI 32768  
SF 100.6127586 MHz  
WDW EM  
SSB 0  
LB 1.00 Hz  
GB 0  
PC 1.40

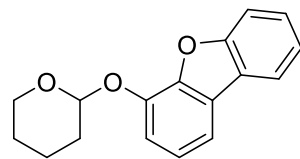

**3w**

400 MHz <sup>1</sup>H NMR  
CDCl<sub>3</sub>

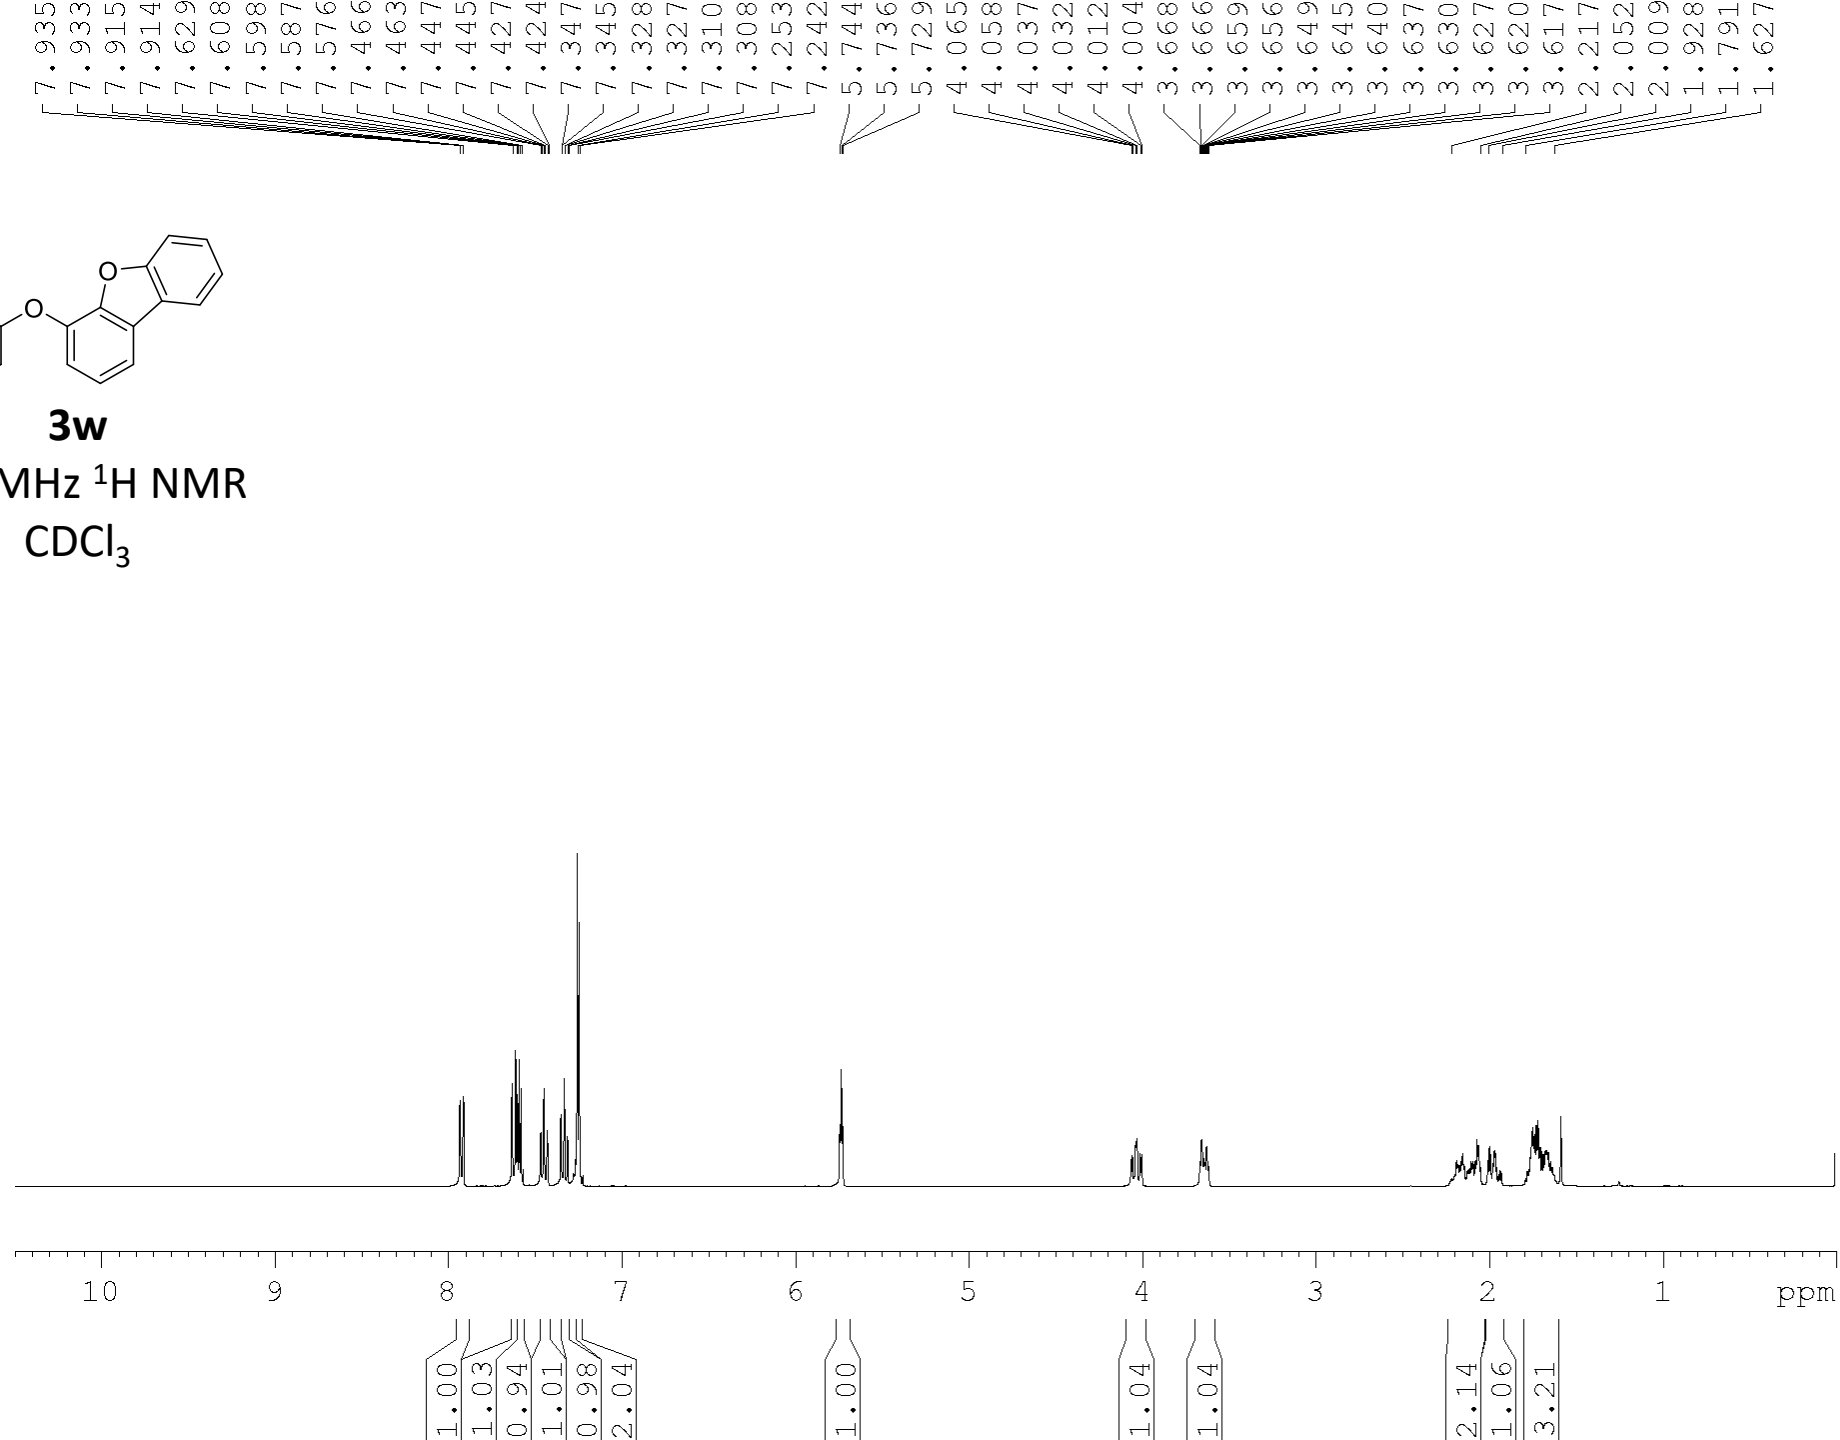

```

Current Data Parameters
NAME      vinn-7-110-3-ialt-20230810
EXPNO     1
PROCNO    1

F2 - Acquisition Parameters
Date_     20230810
Time      17.17 h
INSTRUM   spect
PROBHD    zg30
PULPROG   zg30
TD        65536
SOLVENT   CDCl3
NS        16
DS        2
SWH       8012.820 Hz
FIDRES    0.244532 Hz
AQ        4.0894465 sec
RG        90.5
DW        62.400 usec
DE        6.50 usec
TE        295.8 K
D1        1.00000000 sec
D10       1
SFO1      400.1324708 MHz
NUC1      1H
P1        15.00 usec
PLW1      12.50000000 W

F2 - Processing parameters
SI        65536
SF        400.1300168 MHz
WDW       EM
SSB       0
LB        0.30 Hz
GB        0
PC        1.00

```

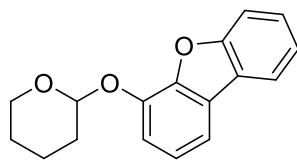

**3w**

100 MHz <sup>13</sup>C NMR  
CDCl<sub>3</sub>

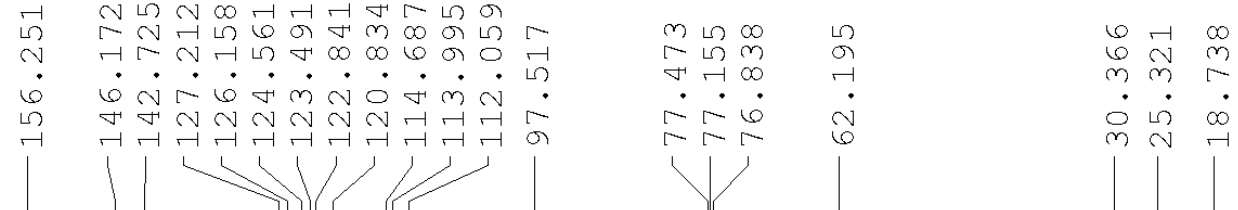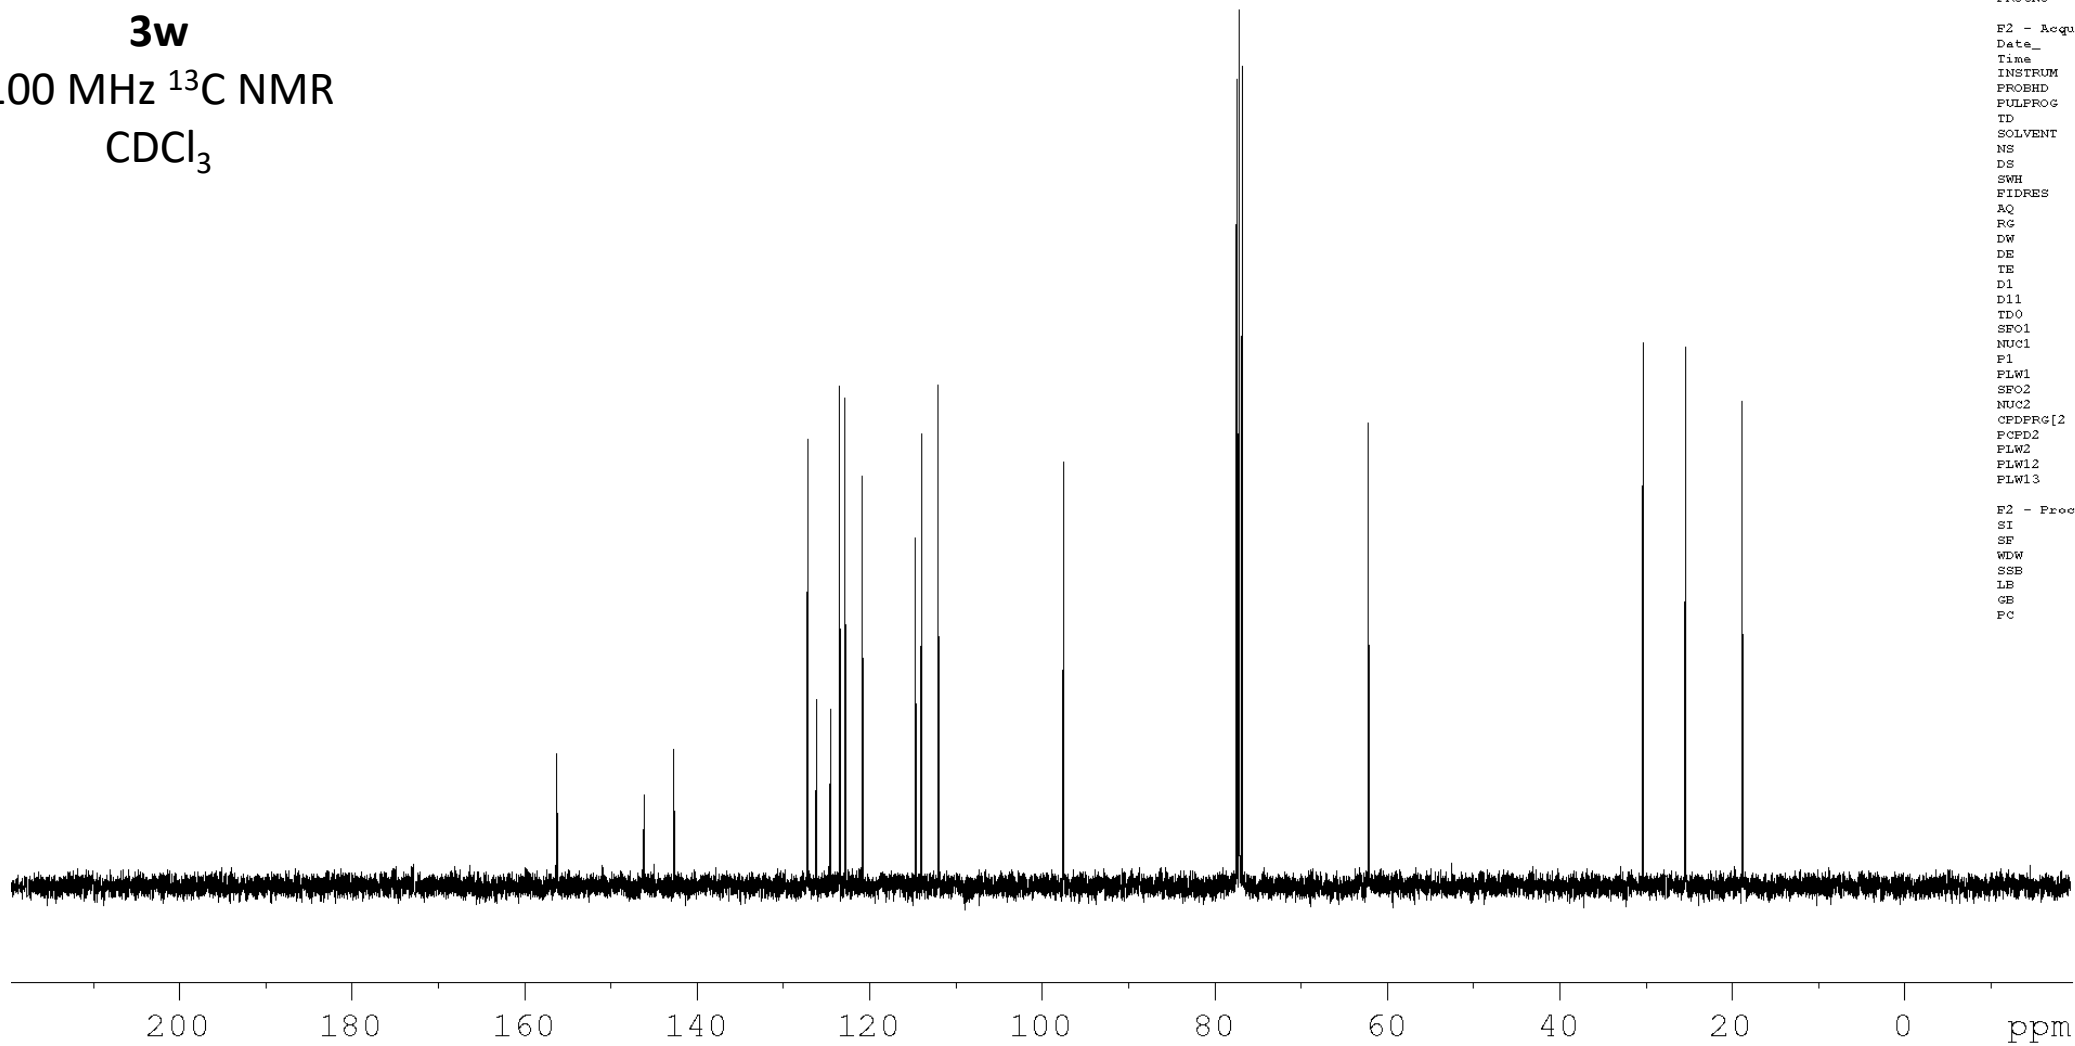

```

Current Data Parameters
NAME      vinn-7-110-3-ialt-20230810
EXPNO     2
PROCNO    1

F2 - Acquisition Parameters
Date_     20230810
Time      17.22 h
INSTRUM   spect
PROBHD    E108618_0257 {
FULPROG   zgpg30
TD         65536
SOLVENT   CDCl3
NS         60
DS         4
SWH        24038.461 Hz
FIDRES     0.733596 Hz
AQ         1.3631488 sec
RG         203
DW         20.800 usec
DE         6.50 usec
TE         296.1 K
D1         2.00000000 sec
D11        0.03000000 sec
TD0        1
SFO1       100.6228298 MHz
NUC1       13C
P1         10.00 usec
PLW1       51.00000000 W
SFO2       400.1316005 MHz
NUC2       1H
CPDPRG[2] waltz16
PCPD2      90.00 usec
PLW2       12.50000000 W
PLW12      0.34722000 W
PLW13      0.17465000 W

F2 - Processing parameters
SI         32768
SF         100.6127596 MHz
WDW        EM
SSB        0
LB         1.00 Hz
GB         0
PC         1.40

```



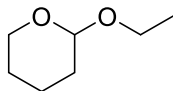

**3x**  
400 MHz <sup>1</sup>H NMR  
CDCl<sub>3</sub>

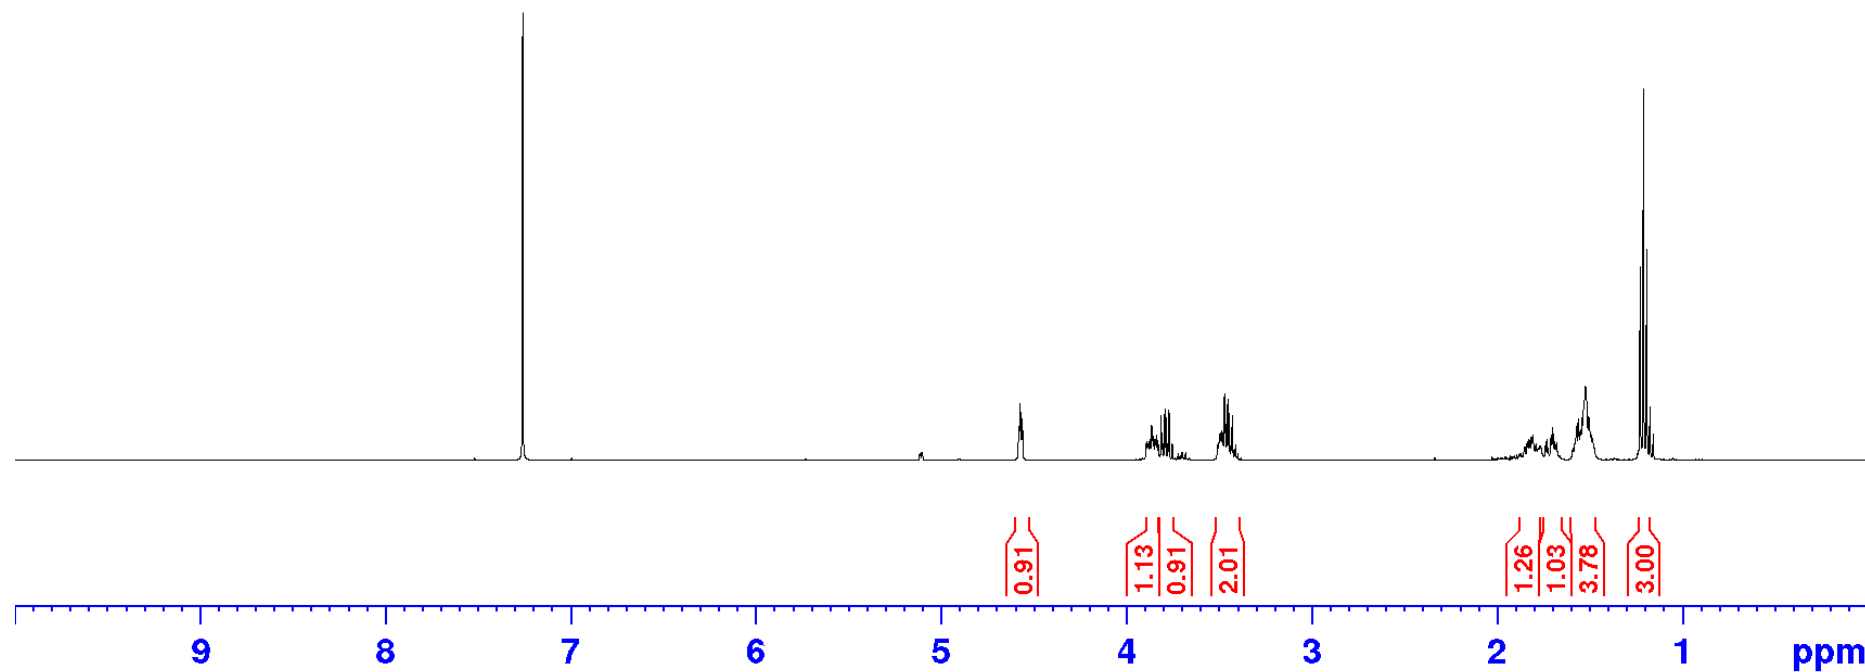

7.2598

4.5817  
4.5750  
4.5705  
4.5633  
3.8920  
3.8306  
3.8128  
3.7709  
3.5098  
3.3996

1.8845  
1.7646  
1.7400  
1.6640  
1.5990  
1.4775  
1.2279  
1.2102  
1.1924



Current Data Parameters  
NAME vinn-4-183-5-isl-20230320  
EXPNO 1  
PROCNO 1

F2 - Acquisition Parameters  
Date\_ 20230320  
Time 12.52 h  
INSTRUM spect  
PROBHD E108618\_0257 {  
PULPROG zg30  
TD 65536  
SOLVENT CDCl3  
NS 16  
DS 2  
SWH 8012.820 Hz  
FIDRES 0.244532 Hz  
AQ 4.0894665 sec  
RG 71.8  
DW 62.400 usec  
DE 6.50 usec  
TE 295.4 K  
D1 1.00000000 sec  
TD0 1  
SFO1 400.1324708 MHz  
NUC1 1H  
P1 15.00 usec  
PLW1 12.50000000 W

F2 - Processing parameters  
SI 65536  
SF 400.1300101 MHz  
WDW EM  
SSB 0  
LB 0.30 Hz  
GB 0  
PC 1.00

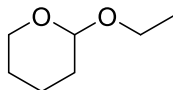

**3x**  
100 MHz  $^{13}\text{C}$  NMR  
 $\text{CDCl}_3$

98.84  
77.47  
77.36  
77.16  
76.84  
63.00  
62.58  
30.94  
25.59  
19.89  
15.32

Current Data Parameters  
NAME vinn-4-183-5-isl-20230320  
EXPNO 2  
PROCNO 1

F2 - Acquisition Parameters  
Date\_ 20230320  
Time 12.56 h  
INSTRUM spect  
PROBHD z108618\_0257 ( )  
PULPROG zgpg30  
TD 65536  
SOLVENT cdcl3  
NS 37  
DS 4  
SWH 24038.461 Hz  
FIDRES 0.733596 Hz  
AQ 1.3631488 sec  
RG 203  
DW 20.800 usec  
DE 6.50 usec  
TE 296.0 K  
D1 2.00000000 sec  
D11 0.03000000 sec  
TD0 1  
SFO1 100.6228298 MHz  
NUC1  $^{13}\text{C}$   
P1 10.00 usec  
PLW1 51.00000000 W  
SFO2 400.1316005 MHz  
NUC2  $^1\text{H}$   
PCPD2 waltz16  
PCPD2 90.00 usec  
PLW2 12.50000000 W  
PLW12 0.34722000 W  
PLW13 0.17465000 W

F2 - Processing parameters  
SI 32768  
SF 100.6127571 MHz  
WDW EM  
SSB 0  
LB 1.00 Hz  
GB 0  
PC 1.40

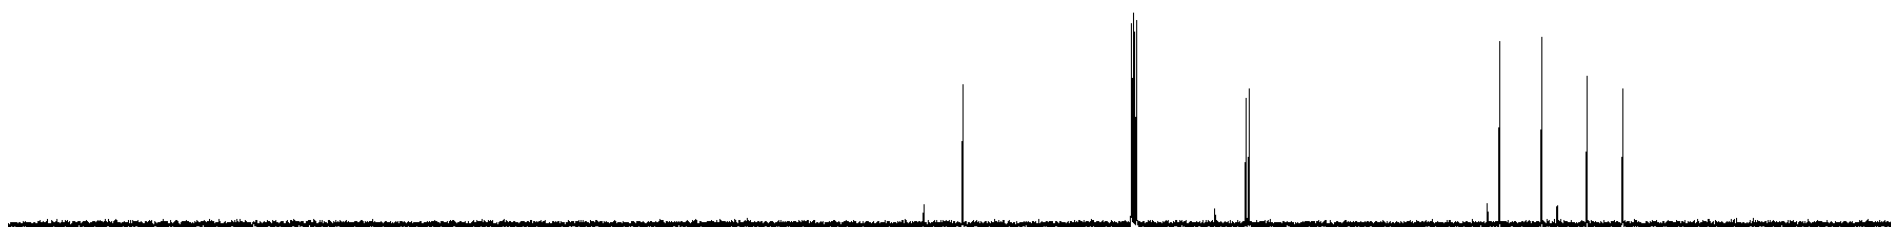

200 180 160 140 120 100 80 60 40 20 0 ppm

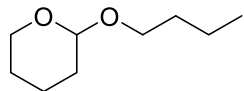

**3y**  
400 MHz <sup>1</sup>H NMR  
CDCl<sub>3</sub>

4.5684  
4.5618  
4.5511  
3.8833  
3.8279  
3.7535  
3.7364  
3.7295  
3.7193  
3.7124  
3.6953  
3.5091  
3.4555  
3.4016  
3.3851  
3.3776  
3.3686  
3.3611  
3.3446  
1.8528  
1.7735  
1.7304  
1.6686  
1.6040  
1.4742  
1.4219  
1.3284  
0.9308  
0.9124  
0.8940

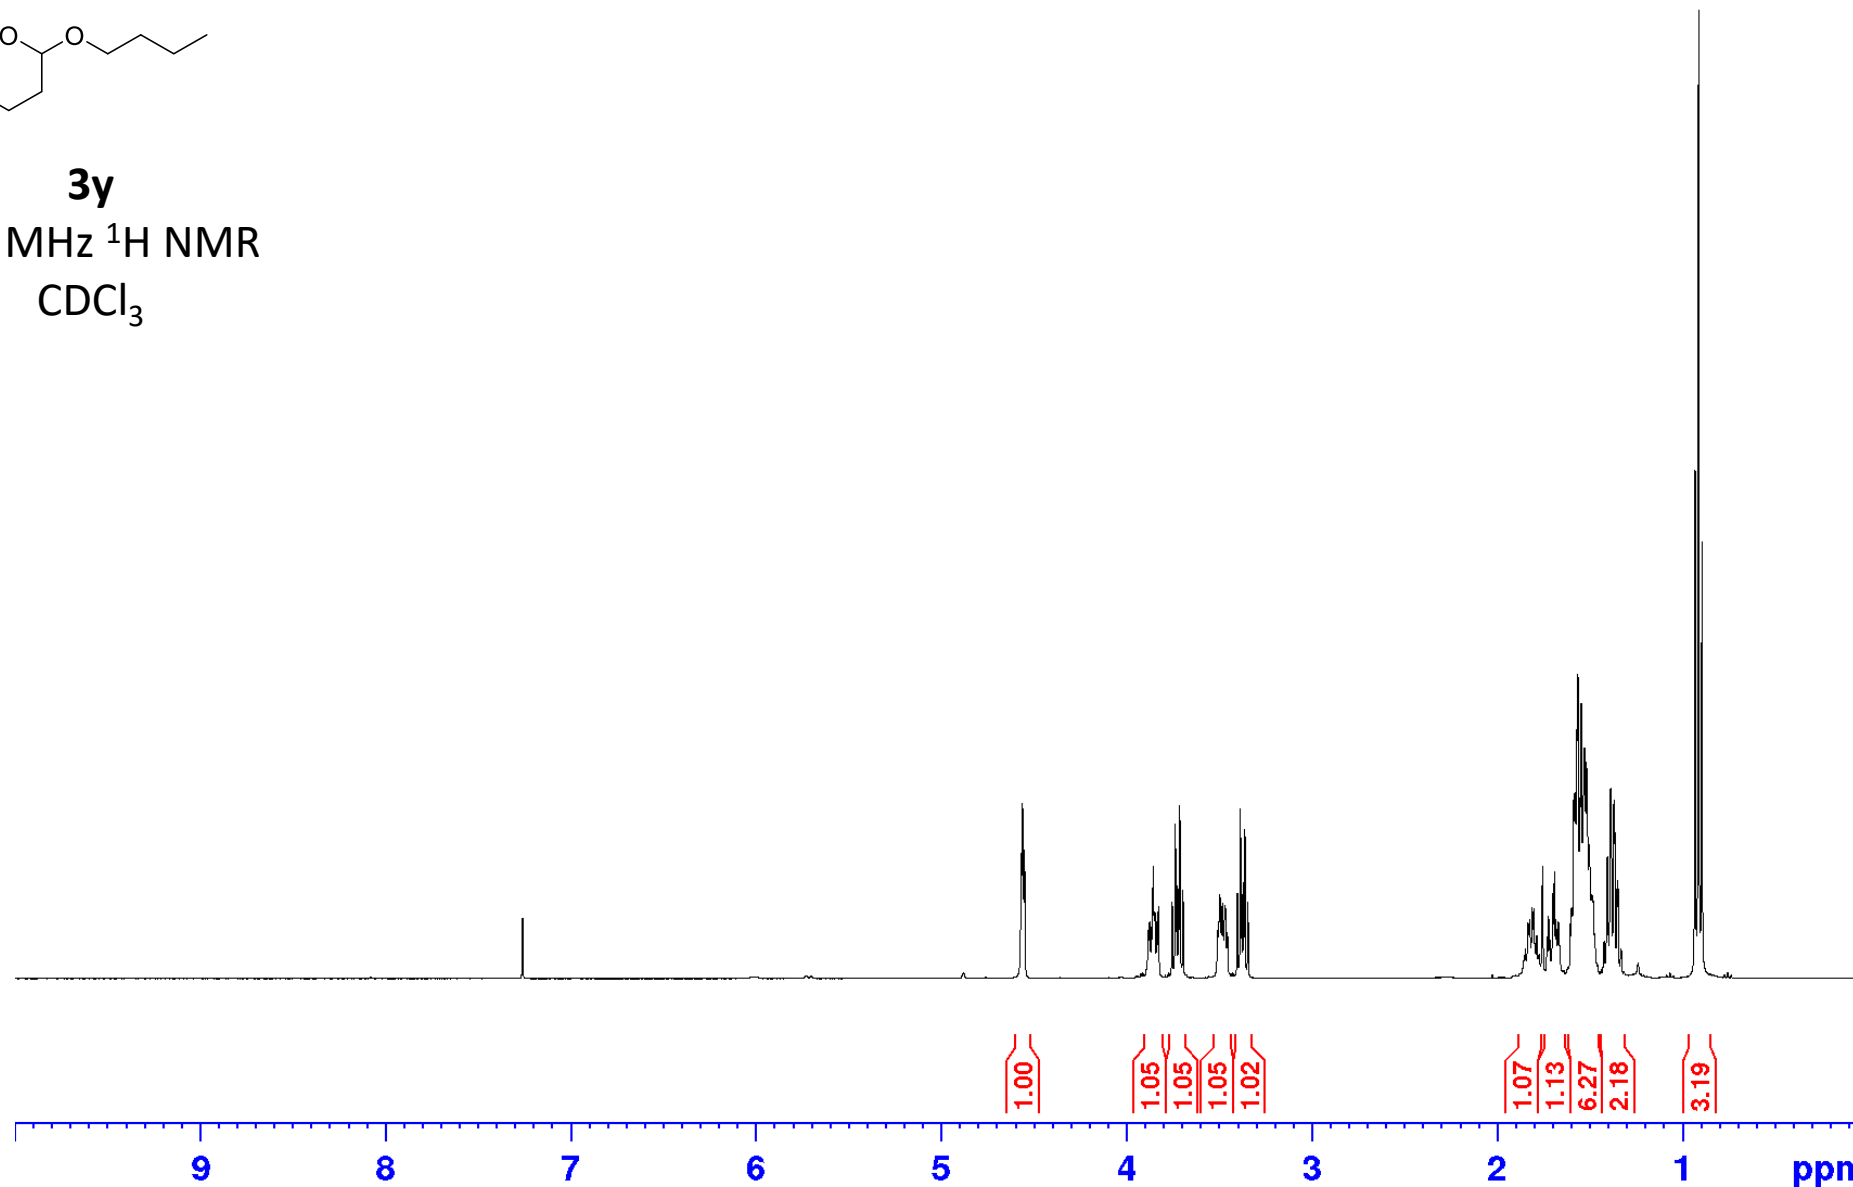

Current Data Parameters  
NAME vinn-4-183-13-islt2-20230329  
EXPNO 1  
PROCNO 1

F2 - Acquisition Parameters

Date\_ 20230329  
Time 16.24 h  
INSTRUM spect  
PROBHD E108618\_0257 (   
PULPROG zg30  
TD 65536  
SOLVENT CDCl3  
NS 8  
DS 2  
SWH 8012.820 Hz  
FIDRES 0.244532 Hz  
AQ 4.0894465 sec  
RG 64  
DW 62.400 usec  
DE 6.50 usec  
TE 298.4 K  
D1 1.00000000 sec  
TD0 1  
SFO1 400.1324708 MHz  
NUC1 1H  
P1 15.00 usec  
PLW1 12.50000000 W

F2 - Processing parameters

SI 65536  
SF 400.1300096 MHz  
WDW EM  
SSB 0  
LB 0.30 Hz  
GB 0  
PC 1.00

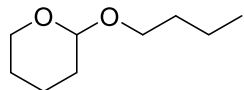

**3y**

100 MHz <sup>13</sup>C NMR  
CDCl<sub>3</sub>

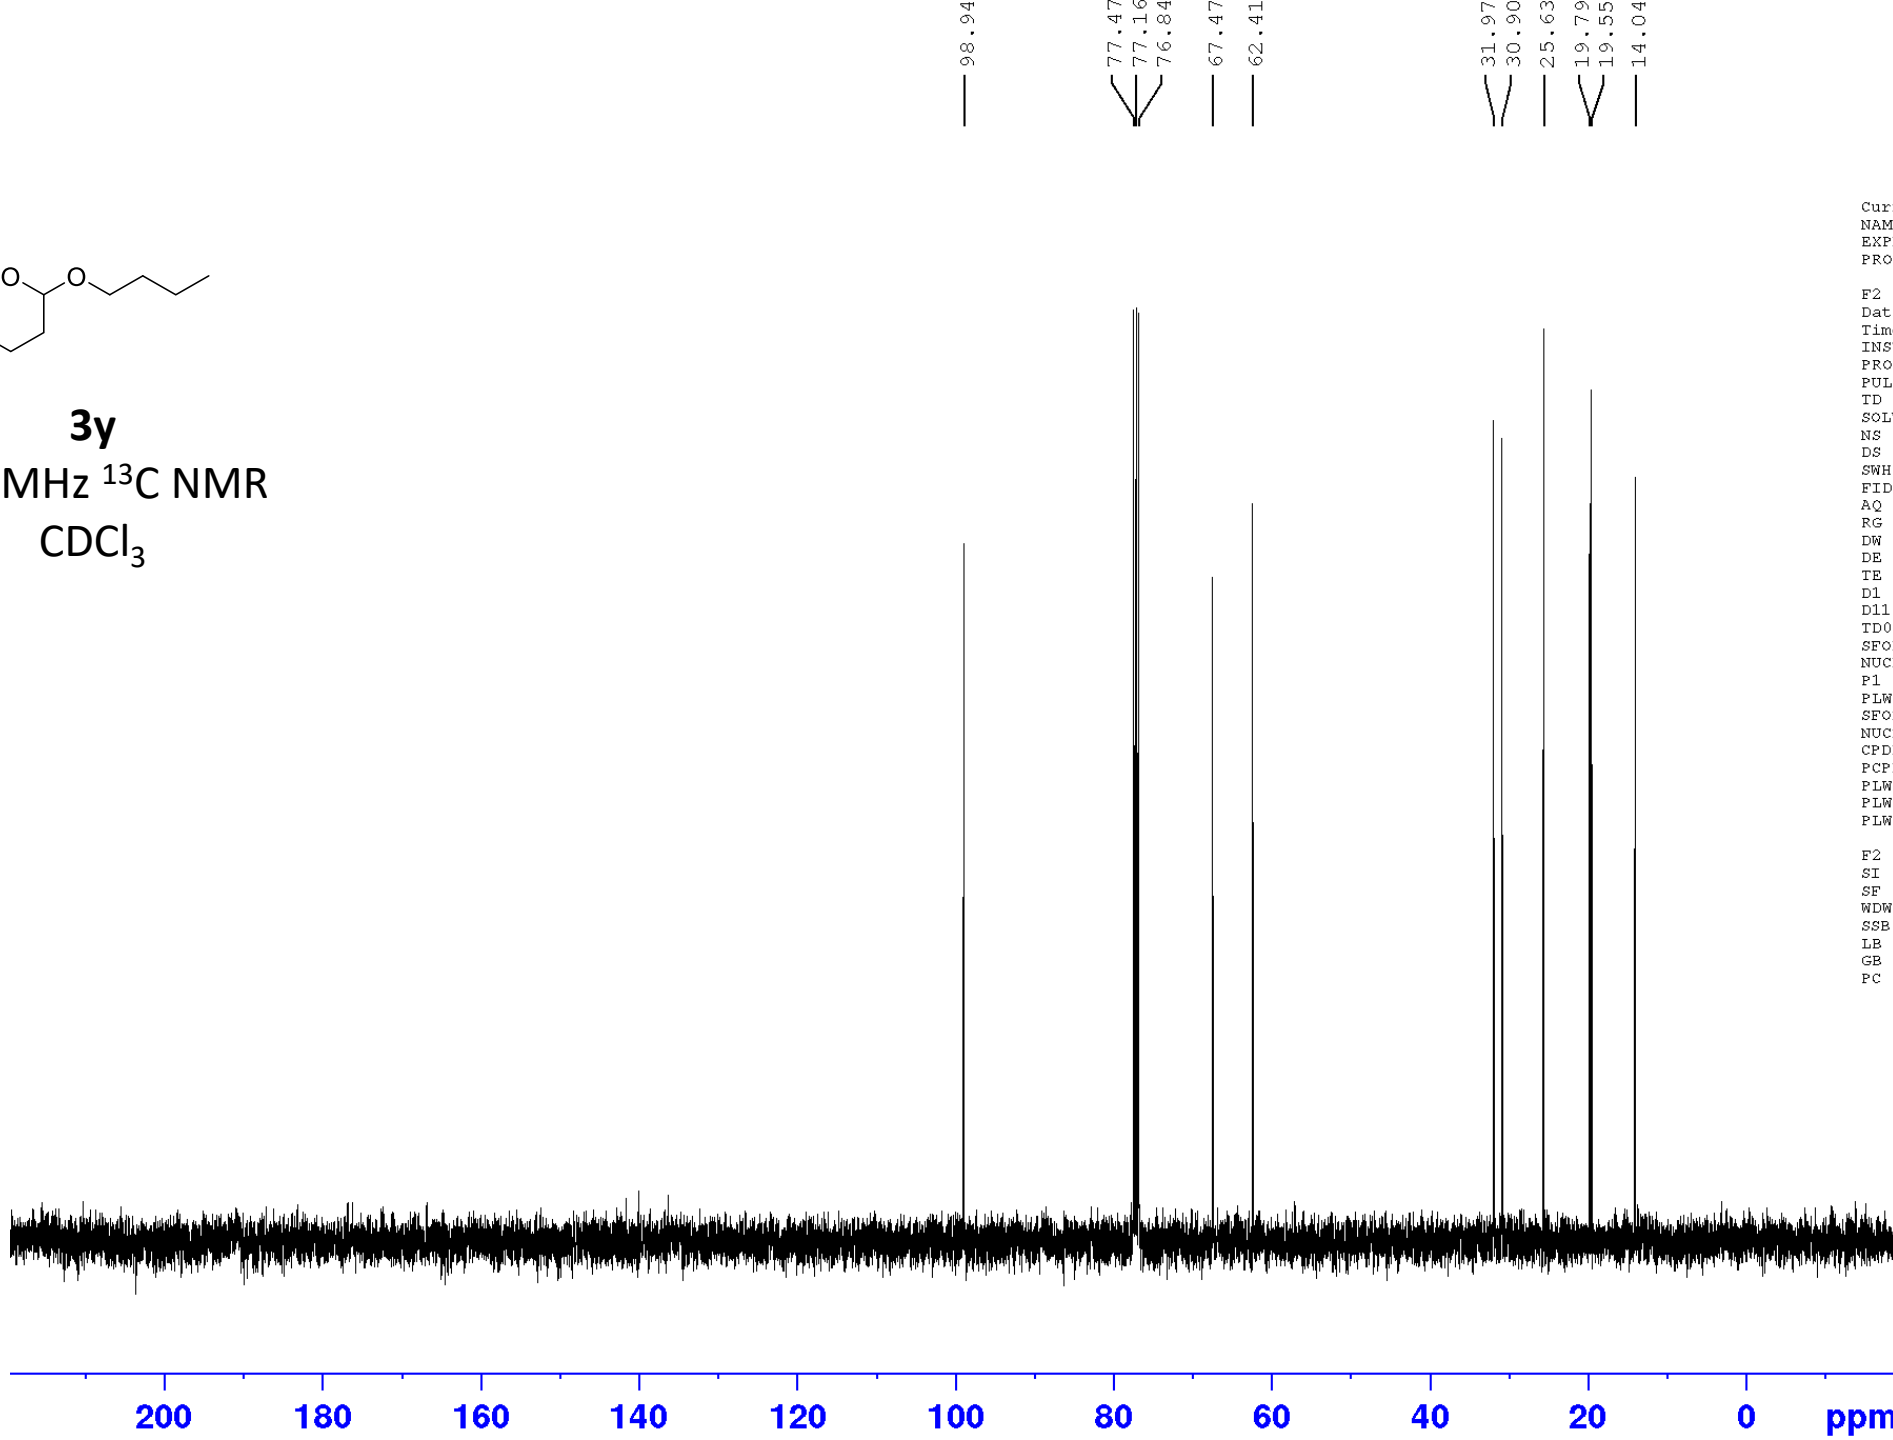

Current Data Parameters  
NAME vinn-4-183-13-islt2-20230321  
EXPNO 2  
PROCNO 1

F2 - Acquisition Parameters  
Date\_ 20230329  
Time 16.27 h  
INSTRUM spect  
PROBHD z108618\_0257 (   
PULPROG zgpg30  
TD 65536  
SOLVENT cdcl3  
NS 15  
DS 4  
SWH 24038.461 Hz  
FIDRES 0.733596 Hz  
AQ 1.3631488 sec  
RG 203  
DW 20.800 usec  
DE 6.50 usec  
TE 298.3 K  
D1 2.00000000 sec  
D11 0.03000000 sec  
TD0 1  
SFO1 100.6228298 MHz  
NUC1 13C  
P1 10.00 usec  
PLW1 51.00000000 W  
SFO2 400.1316005 MHz  
NUC2 1H  
CPDPRG[2] waltz16  
PCPD2 90.00 usec  
PLW2 12.50000000 W  
PLW12 0.34722000 W  
PLW13 0.17465000 W

F2 - Processing parameters  
SI 32768  
SF 100.6127562 MHz  
WDW EM  
SSB 0  
LB 1.00 Hz  
GB 0  
PC 1.40

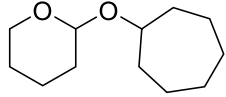

**3z**

500 MHz <sup>1</sup>H NMR

CDCl<sub>3</sub>

4.6552  
4.6403  
3.9239  
3.8809  
3.8079  
3.7571  
3.4974  
3.4544  
1.9845  
1.9267  
1.8644  
1.7960  
1.7195  
1.6093  
1.5930  
1.4669  
1.4323  
1.3312

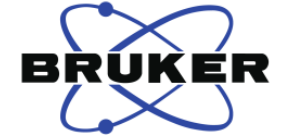

```

Current Data Parameters
NAME      vinn-4-141-6-isl2-2020012
EXPNO    1
PROCNO   1

F2 - Acquisition Parameters
Date_    20210121
Time     10.14 h
INSTRUM  spect
PROBHD   zg30
PULPROG  zg30
TD       65536
SOLVENT  cdcl3
NS       16
DS       2
SWH      10000.000 Hz
FIDRES   0.305176 Hz
AQ       3.2767999 sec
RG       63.76
DW       50.000 usec
DE       6.50 usec
TE       295.1 K
D1       1.00000000 sec
TD0      1
SF01     500.1330883 MHz
NUC1     1H
F1       10.91 usec
PLW1     25.00000000 W

F2 - Processing parameters
SI       65536
SF       500.1300126 MHz
WDW      EM
SSB      0
LB       0.30 Hz
GB       0
PC       1.00
  
```

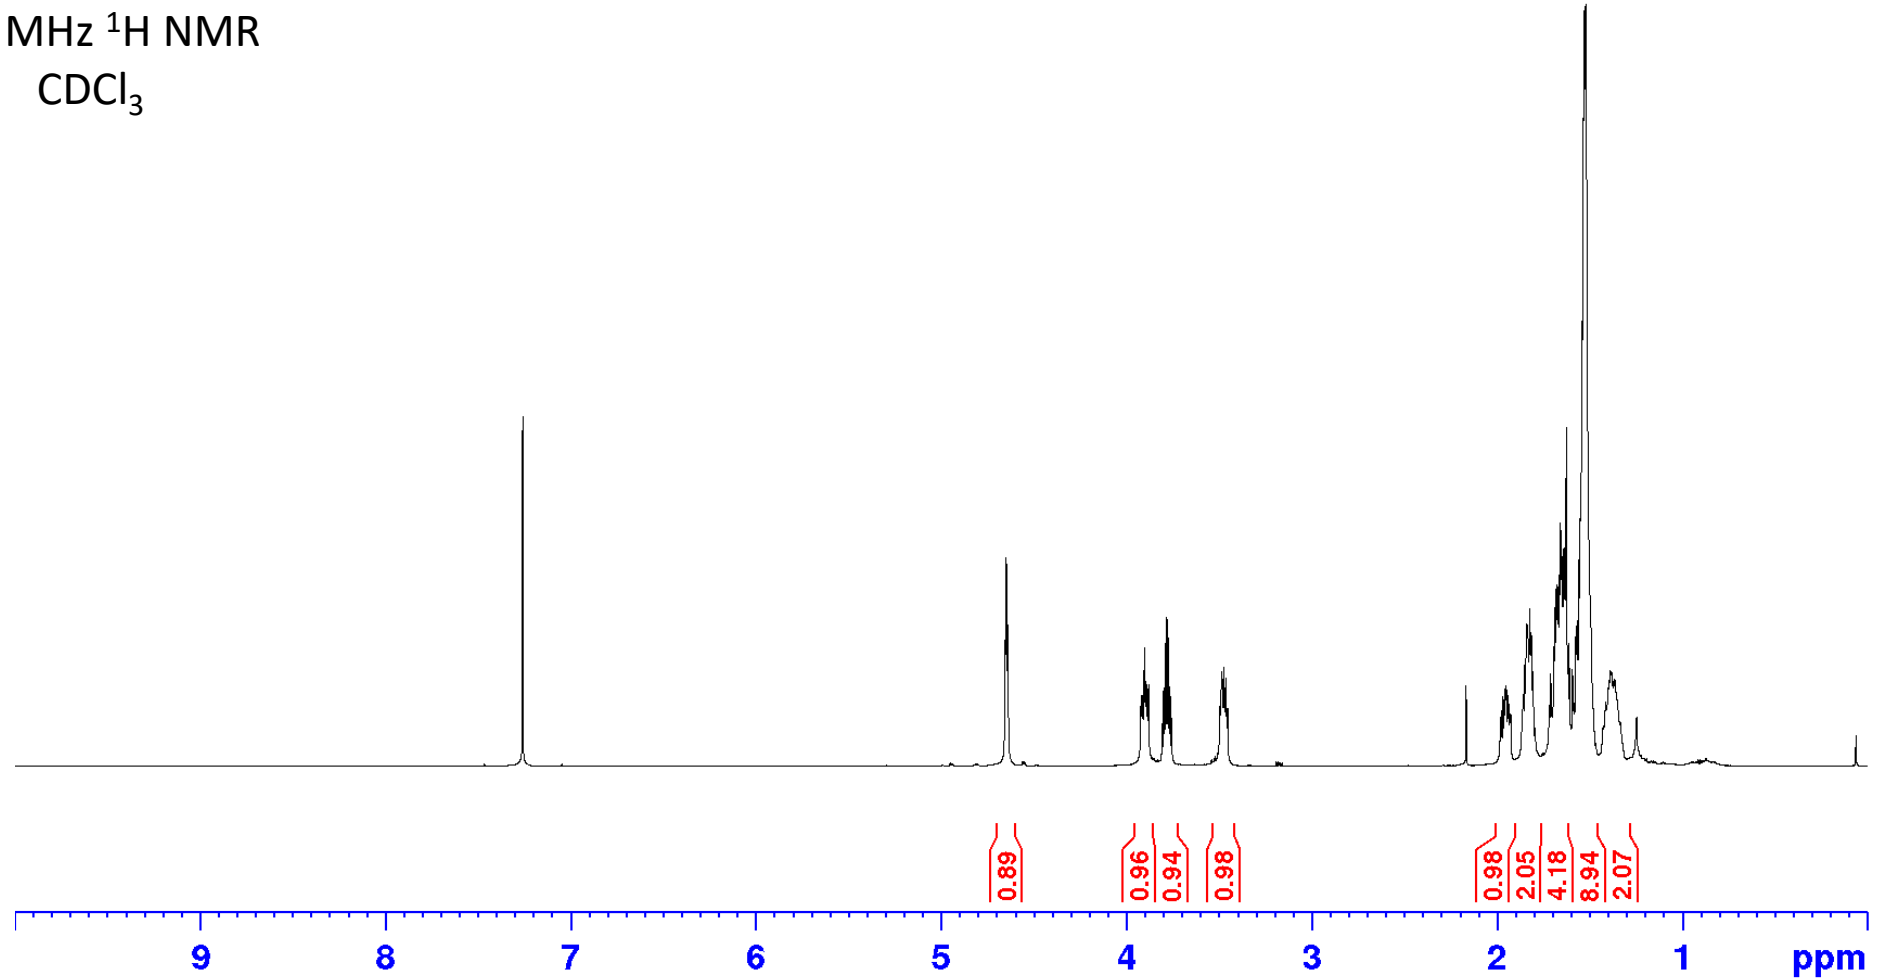



**3z**

125 MHz <sup>13</sup>C NMR

CDCl<sub>3</sub>

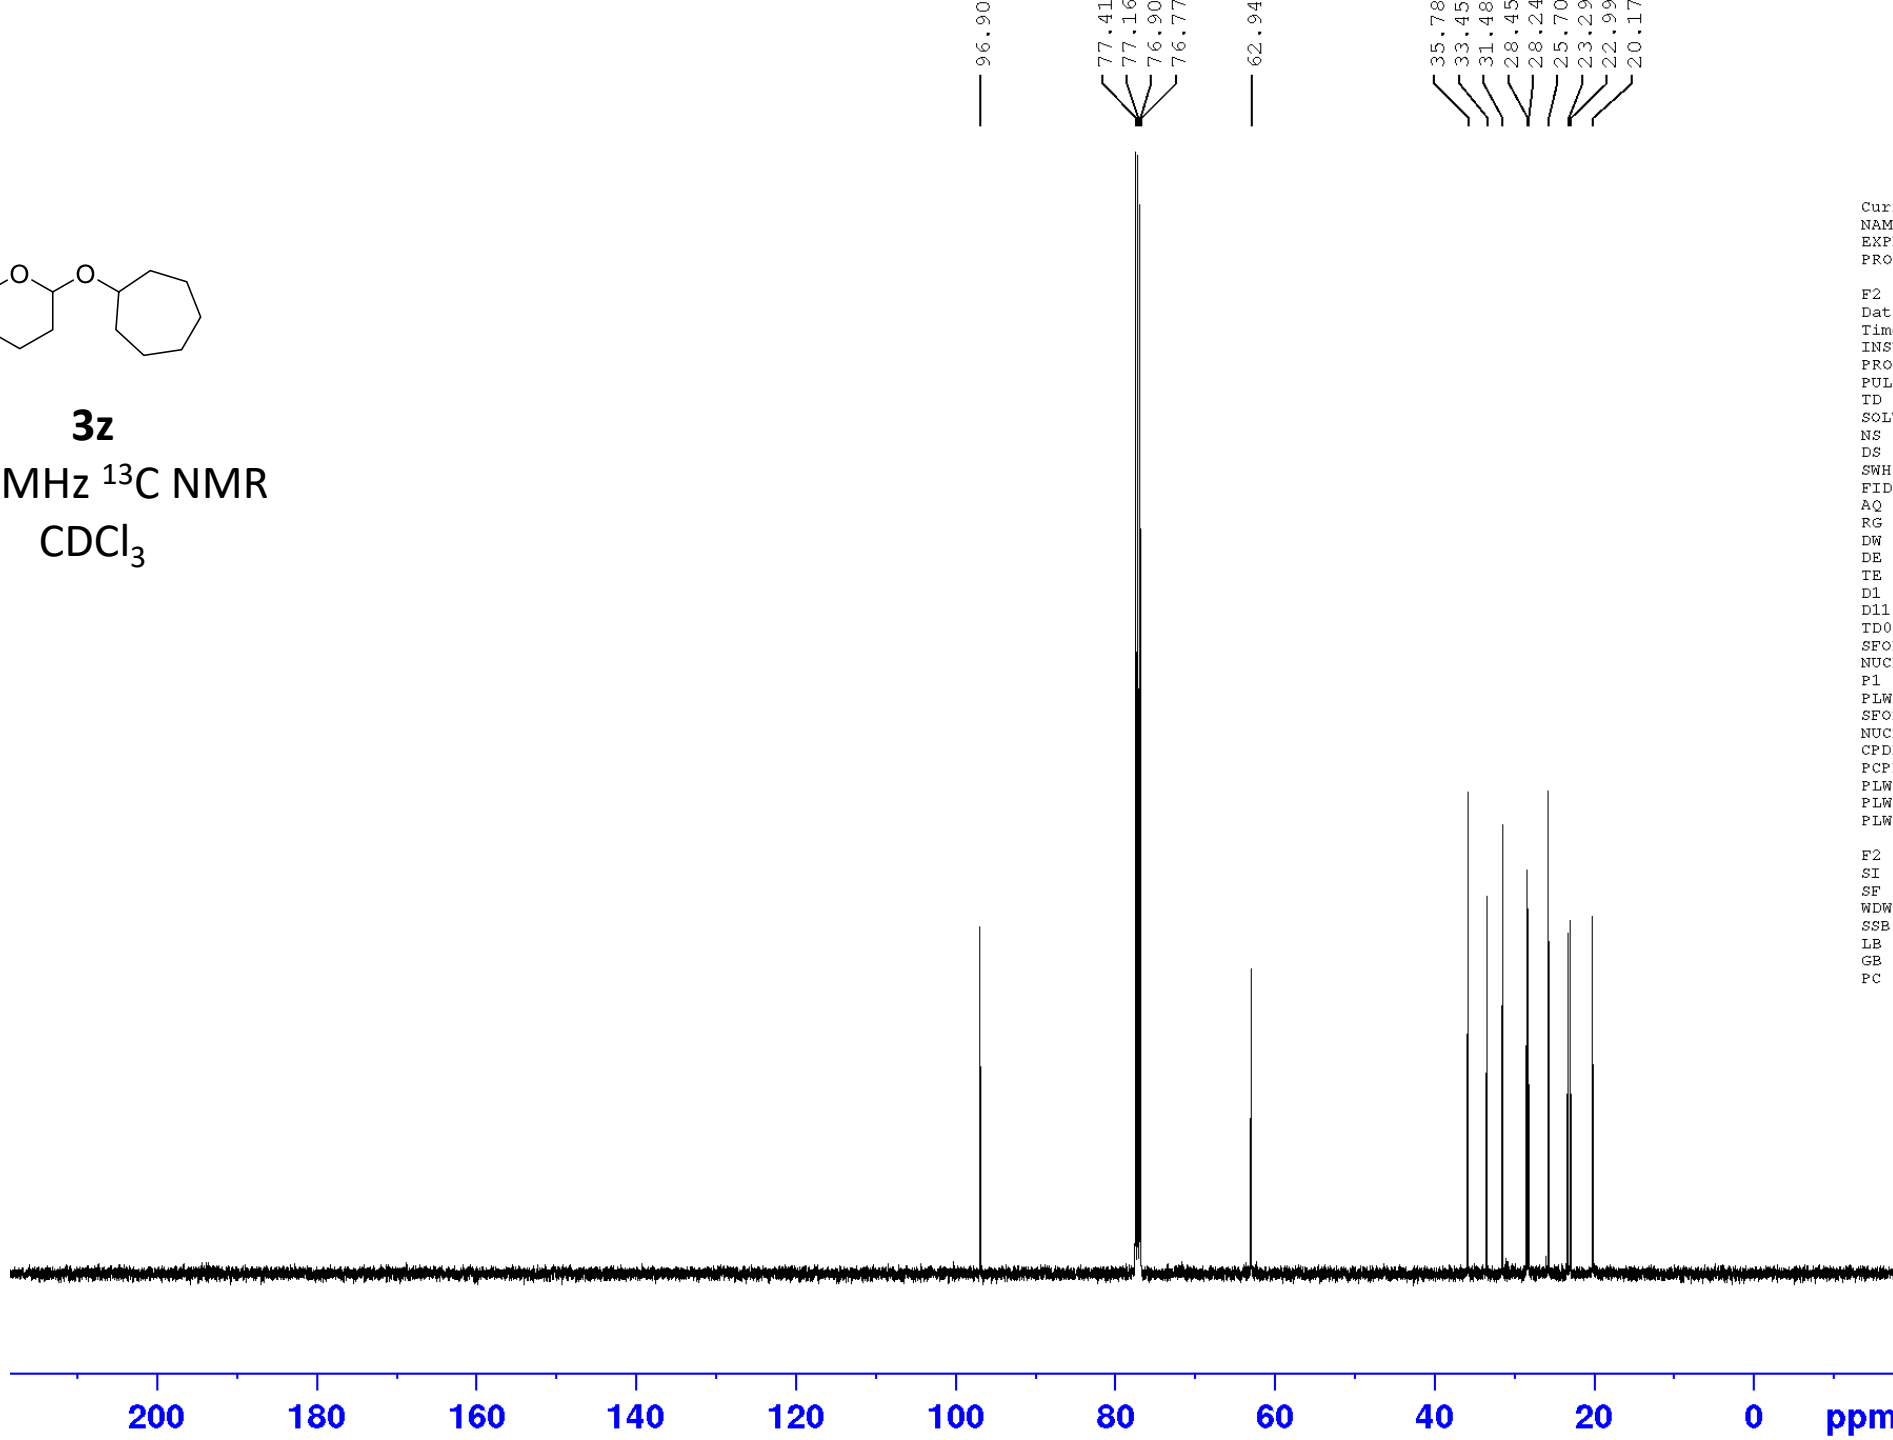

Current Data Parameters  
 NAME vinn-4-141-6-islt2-20200120  
 EXPNO 2  
 PROCNO 1

F2 - Acquisition Parameters  
 Date\_ 20210121  
 Time 10.28 h  
 INSTRUM spect  
 PROBHD z119470\_0283 (  
 PULPROG zgpg30  
 TD 65536  
 SOLVENT cdcl3  
 NS 256  
 DS 4  
 SWH 29761.904 Hz  
 FIDRES 0.908261 Hz  
 AQ 1.1010048 sec  
 RG 206.72  
 DW 16.800 usec  
 DE 6.50 usec  
 TE 295.2 K  
 D1 2.00000000 sec  
 D11 0.03000000 sec  
 TD0 1  
 SFO1 125.7703643 MHz  
 NUC1 13C  
 P1 9.75 usec  
 PLW1 94.00000000 W  
 SFO2 500.1320005 MHz  
 NUC2 1H  
 CPDPRG[2] waltz16  
 PCPD2 80.00 usec  
 PLW2 25.00000000 W  
 PLW12 0.46495000 W  
 PLW13 0.23387000 W

F2 - Processing parameters  
 SI 32768  
 SF 125.7577733 MHz  
 WDW EM  
 SSB 0  
 LB 1.00 Hz  
 GB 0  
 PC 1.40

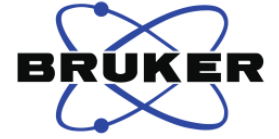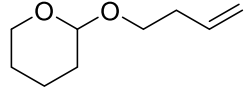

**3aa**  
500 MHz <sup>1</sup>H NMR  
CDCl<sub>3</sub>

5.8816  
5.7998  
5.1139  
5.0795  
5.0424  
5.0219  
4.6016  
4.5951  
4.5876  
3.8885  
3.8449  
3.8074  
3.7603  
3.5183  
3.4307  
2.3781  
2.3645  
2.3509  
2.3374  
1.8534  
1.7891  
1.7353  
1.6848  
1.6051  
1.5004

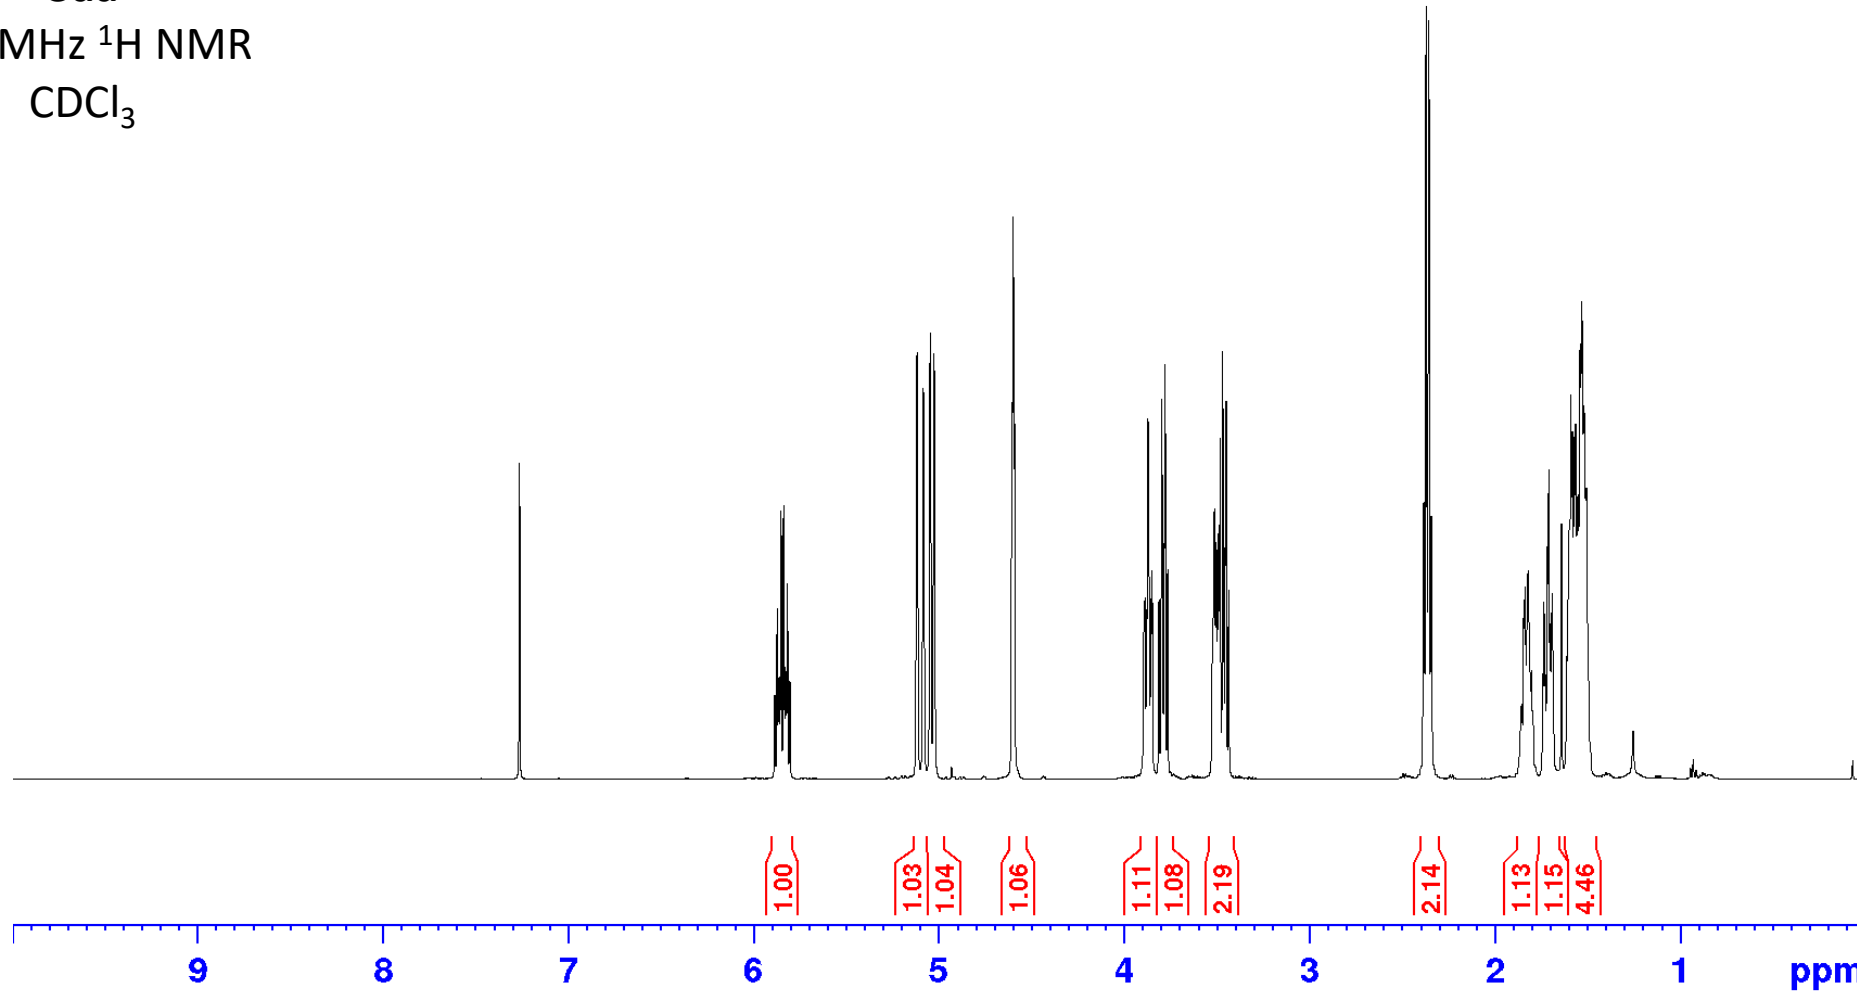

Current Data Parameters  
NAME vinn-4-149-12-ialt-2020013  
EXPNO 1  
PROCNO 1

F2 - Acquisition Parameters  
Date\_ 20210130  
Time 18.42 h  
INSTRUM spect  
PROBHD z119470\_0283 (   
PULPROG zg30  
TD 65536  
SOLVENT CDCl3  
NS 16  
DS 2  
SWH 10000.000 Hz  
FIDRES 0.305176 Hz  
AQ 3.2767999 sec  
RG 63.76  
DW 50.000 usec  
DE 6.50 usec  
TE 295.1 K  
D1 1.00000000 sec  
TDO 1  
SFO1 500.1330883 MHz  
NUC1 1H  
P1 10.91 usec  
PLW1 25.00000000 W

F2 - Processing parameters  
SI 65536  
SF 500.1300122 MHz  
WDW EM  
SSB 0  
LB 0.30 Hz  
GB 0  
PC 1.00

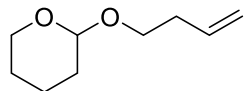

**3aa**

125 MHz <sup>13</sup>C NMR  
CDCl<sub>3</sub>

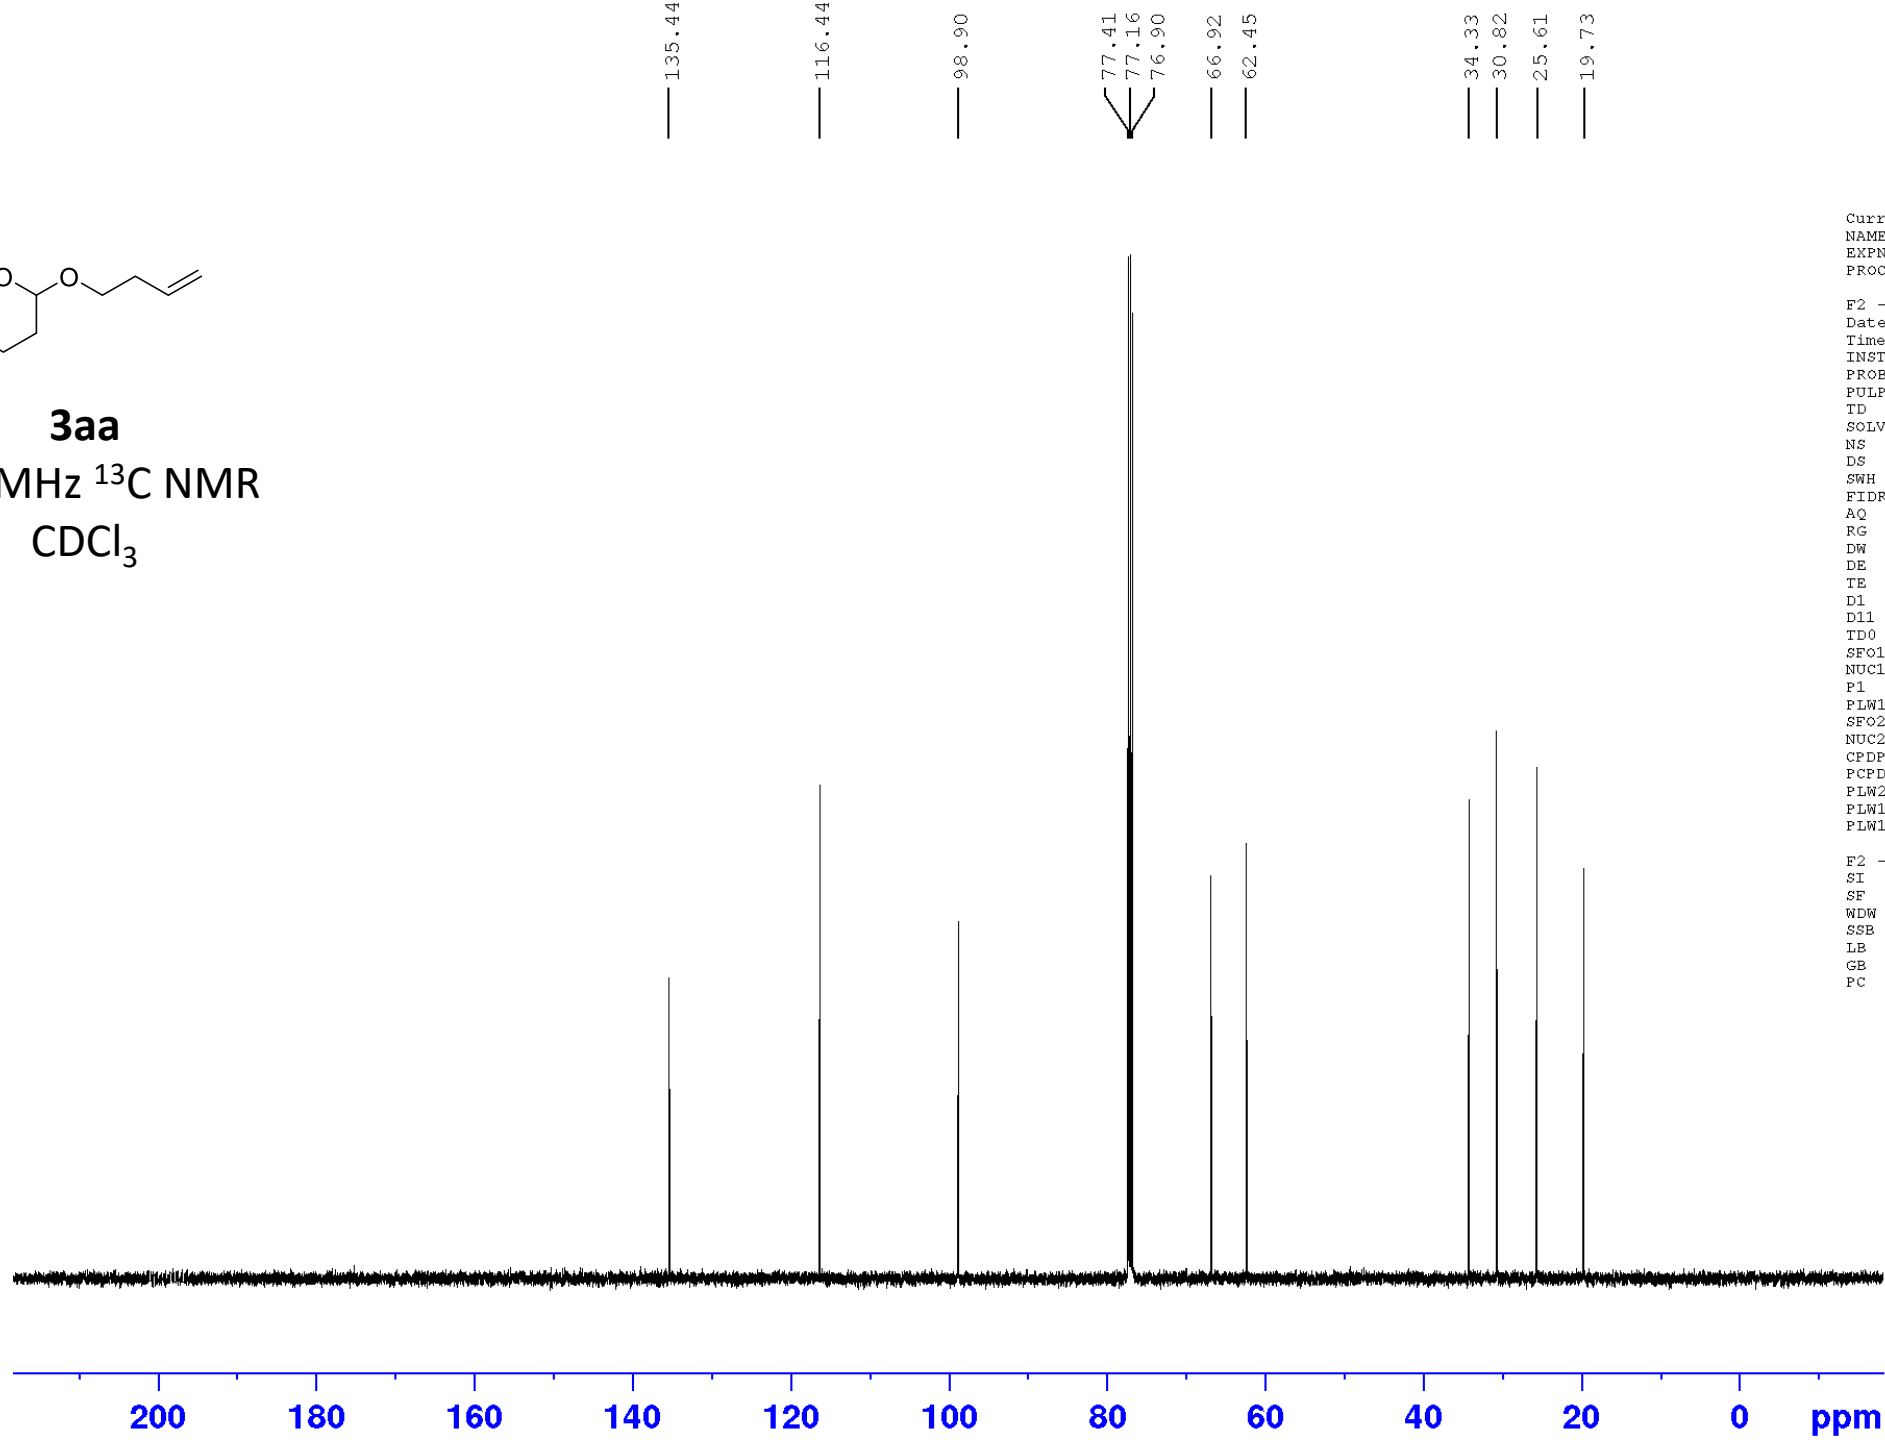

Current Data Parameters  
NAME vinn-4-149-12-islt-20200130  
EXPNO 2  
PROCNO 1

F2 - Acquisition Parameters  
Date\_ 20210130  
Time 18.49 h  
INSTRUM spect  
PROBHD Z119470\_0283 (  
PULPROG zgpg30  
TD 65536  
SOLVENT CDCl3  
NS 128  
DS 4  
SWH 29761.904 Hz  
FIDRES 0.908261 Hz  
AQ 1.1010048 sec  
RG 206.72  
DW 16.800 usec  
DE 6.50 usec  
TE 295.2 K  
D1 2.0000000 sec  
D11 0.03000000 sec  
TD0 1  
SFO1 125.7703643 MHz  
NUC1 13C  
P1 9.75 usec  
PLW1 94.00000000 W  
SFO2 500.1320005 MHz  
NUC2 1H  
CPDPRG[2] waltz16  
PCPD2 80.00 usec  
PLW2 25.00000000 W  
PLW12 0.46495000 W  
PLW13 0.23387000 W

F2 - Processing parameters  
SI 32768  
SF 125.7577732 MHz  
WDW EM  
SSB 0  
LB 1.00 Hz  
GB 0  
PC 1.40



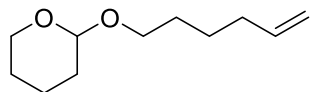

**3ab**  
500 MHz <sup>1</sup>H NMR  
CDCl<sub>3</sub>

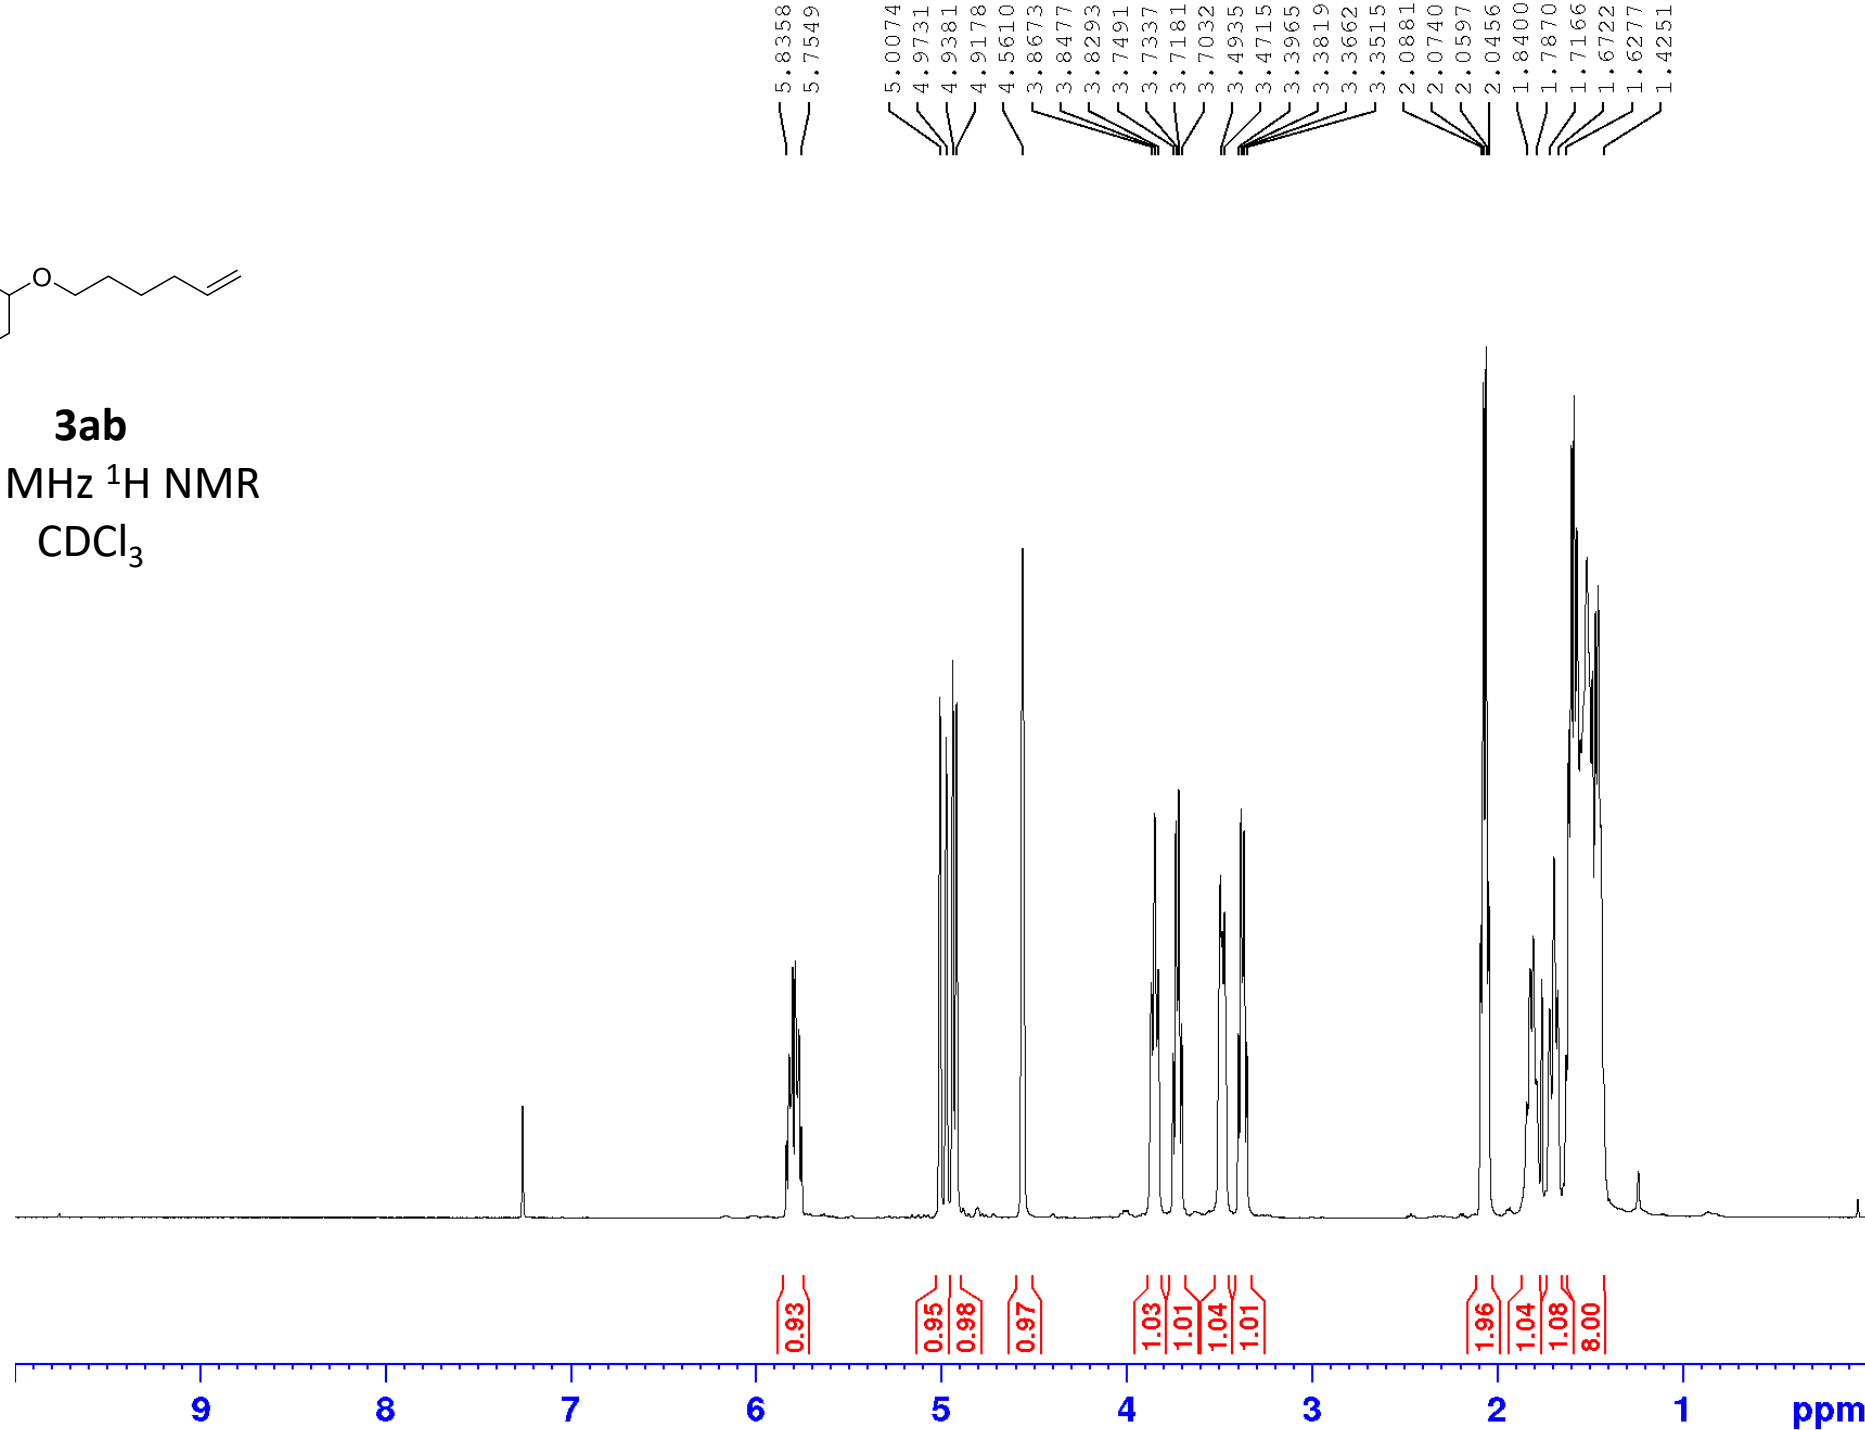

```

Current Data Parameters
NAME      vinn-4-141-7-isl-20201228
EXPNO    1
PROCNO   1

F2 - Acquisition Parameters
Date_    20201228
Time     21.22 h
INSTRUM  spect
PROBHD   E119470_0283 {
PULPROG  zg30
TD        65536
SOLVENT  CDCl3
NS        16
DS        2
SWH       10000.000 Hz
FIDRES    0.305176 Hz
AQ        3.2767999 sec
RG        30.85
DW        50.000 usec
DE        6.50 usec
TE        295.2 K
D1        1.00000000 sec
TD0       1
SFO1     500.1330883 MHz
NUC1      1H
F1        10.91 usec
PLW1     25.00000000 W

F2 - Processing parameters
SI        65536
SF        500.1300123 MHz
WDW       EM
SSB       0
LB        0.30 Hz
GB        0
PC        1.00
  
```

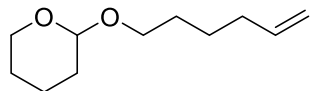

**3ab**  
125 MHz <sup>13</sup>C NMR  
CDCl<sub>3</sub>

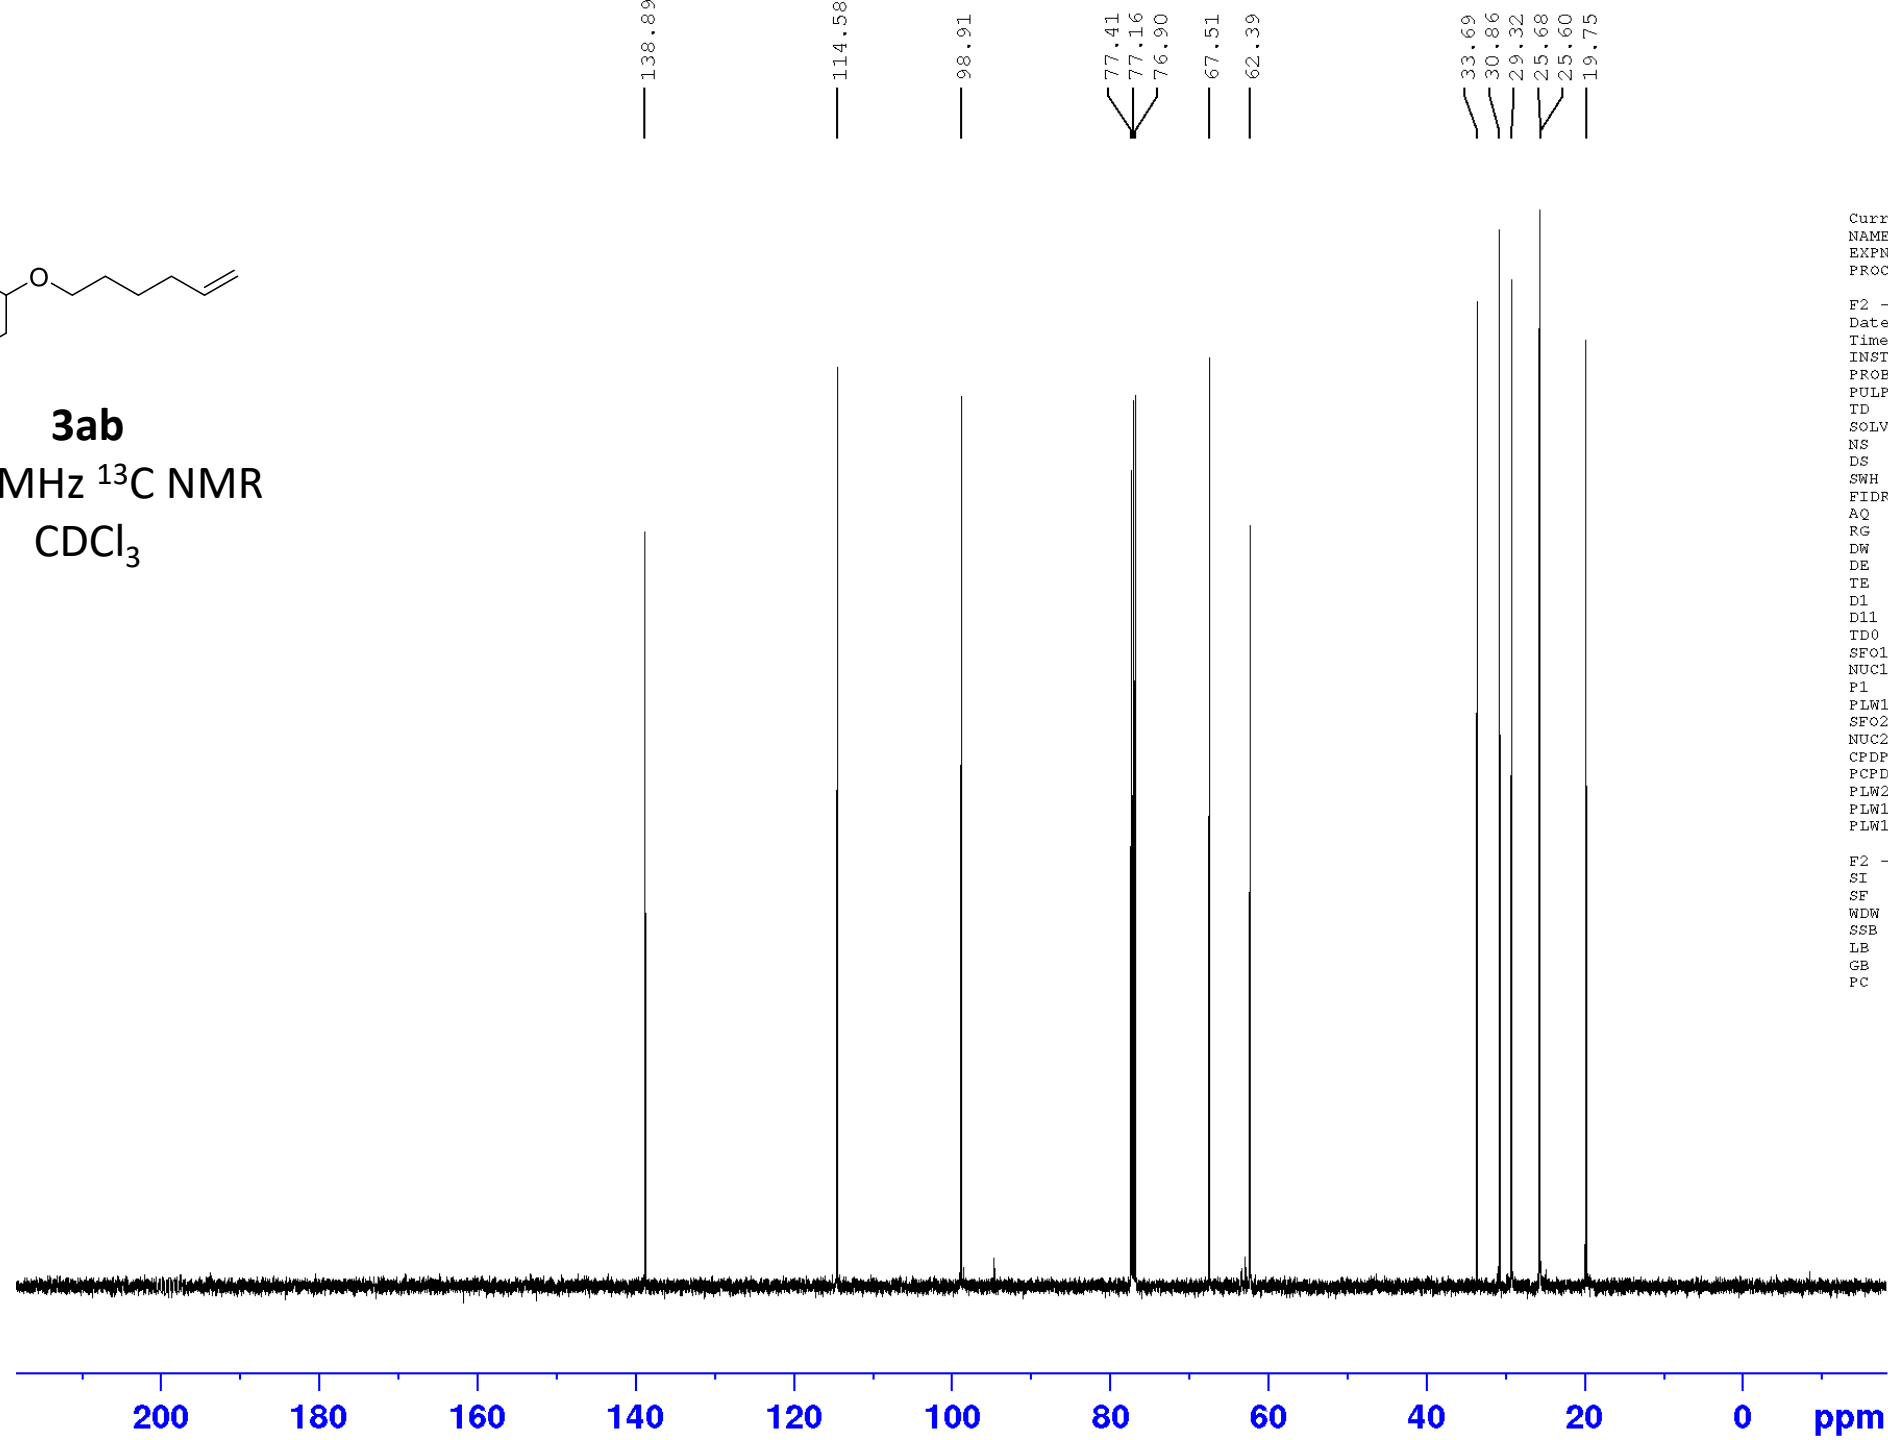

Current Data Parameters  
NAME vinn-4-141-7-isl-20201228  
EXPNO 2  
PROCNO 1

F2 - Acquisition Parameters  
Date\_ 20201228  
Time 21.28 h  
INSTRUM spect  
PROBHD Z119470\_0283 (  
PULPROG zgpg30  
TD 65536  
SOLVENT CDCl3  
NS 100  
DS 4  
SWH 29761.904 Hz  
FIDRES 0.908261 Hz  
AQ 1.1010048 sec  
RG 206.72  
DW 16.800 usec  
DE 6.50 usec  
TE 295.1 K  
D1 2.0000000 sec  
D11 0.0300000 sec  
TD0 1  
SFO1 125.7703643 MHz  
NUC1 13C  
P1 9.75 usec  
PLW1 94.0000000 W  
SFO2 500.1320005 MHz  
NUC2 1H  
CPDPRG[2] waltz16  
PCPD2 80.00 usec  
PLW2 25.0000000 W  
PLW12 0.46495000 W  
PLW13 0.23387000 W

F2 - Processing parameters  
SI 32768  
SF 125.7577754 MHz  
WDW EM  
SSB 0  
LB 1.00 Hz  
GB 0  
PC 1.40

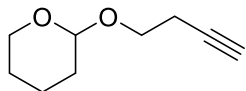

**3ac**  
500 MHz <sup>1</sup>H NMR  
CDCl<sub>3</sub>

4.6443  
4.6375  
4.6305  
3.8934  
3.8022  
3.5828  
3.4815  
2.5011  
2.4962  
2.4871  
2.4823  
2.4732  
2.4684  
1.9702  
1.9655  
1.9610  
1.8477  
1.7868  
1.7354  
1.6819  
1.6188  
1.5034

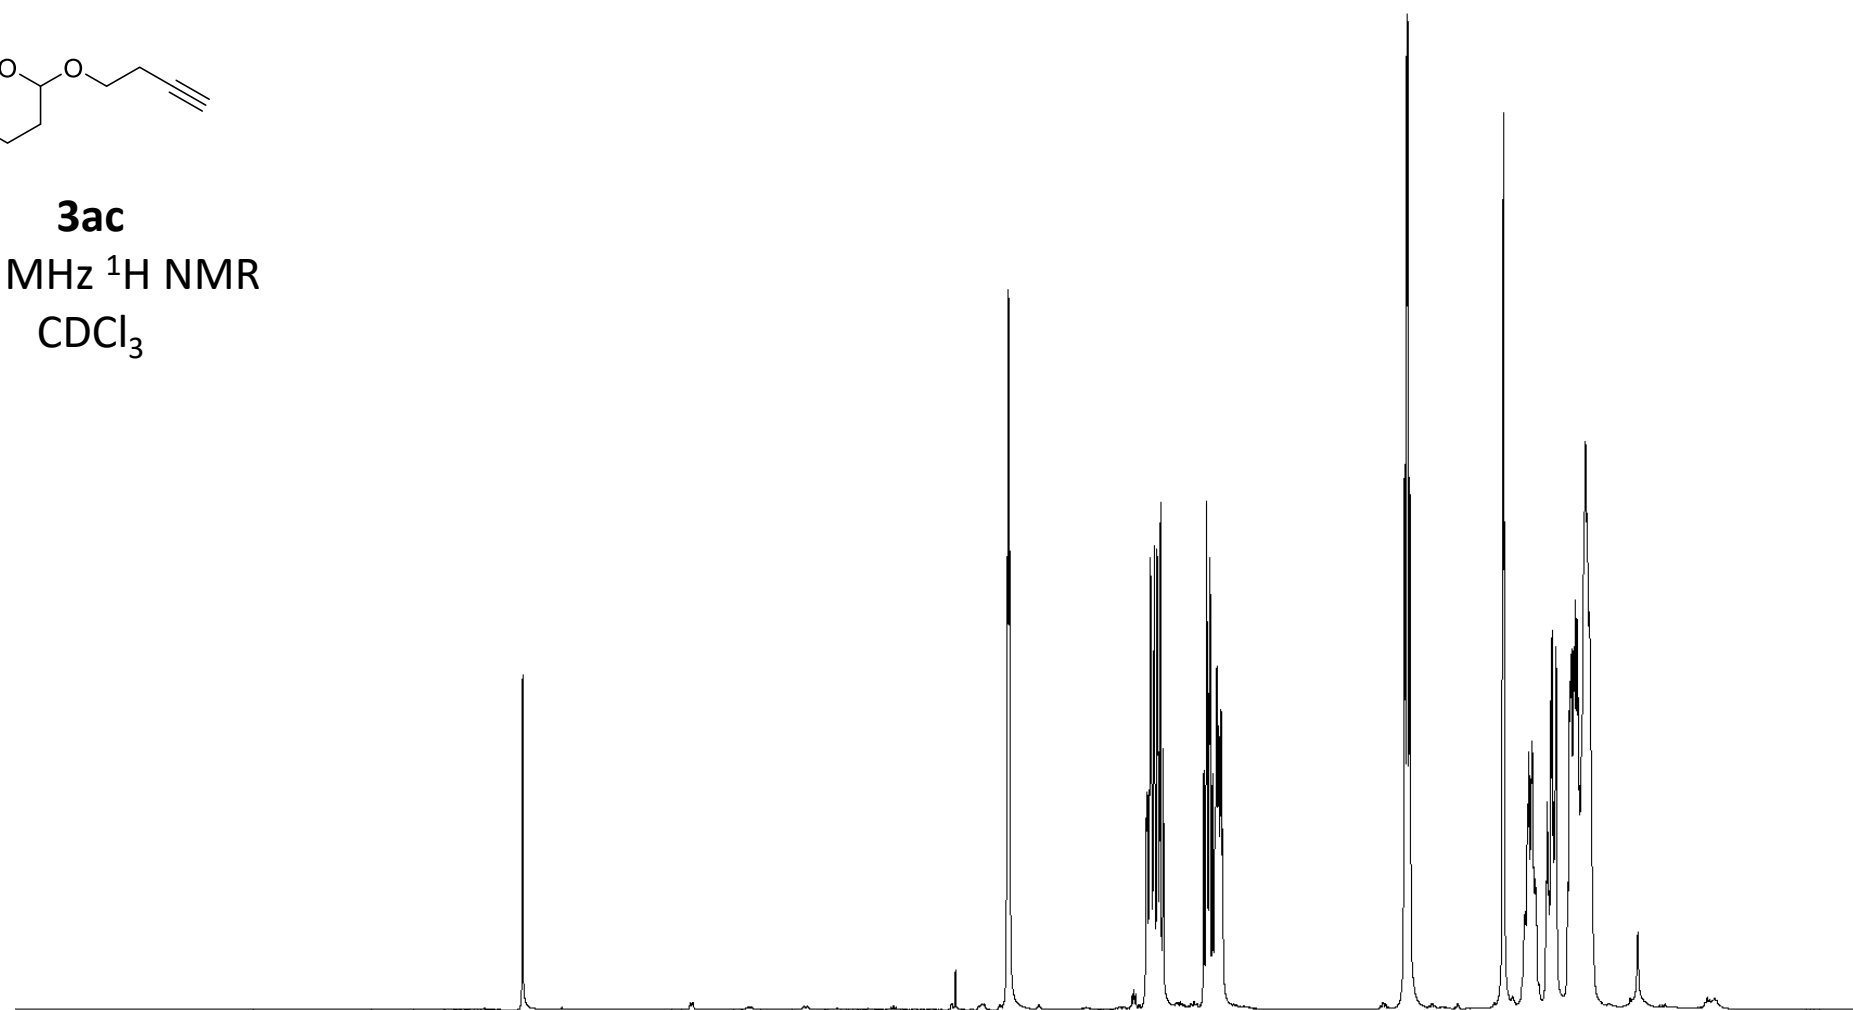

1.00  
2.05  
2.06  
2.03  
0.93  
1.07  
1.19  
4.15

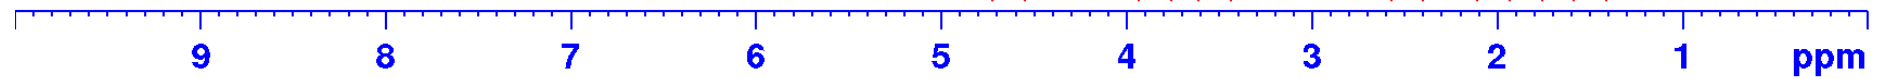

```

Current Data Parameters
NAME      vinn-4-149-10-ialt-2020013
EXPNO    1
PROCNO   1

F2 - Acquisition Parameters
Date_    20210130
Time     18.19 h
INSTRUM  spect
PROBHD   zg30
PULPROG  zg30
TD       65536
SOLVENT  cdcl3
NS       16
DS       2
SWH      10000.000 Hz
FIDRES   0.305176 Hz
AQ       3.2767999 sec
RG       50.6
DW       50.000 usec
DE       6.50 usec
TE       295.2 K
D1       1.00000000 sec
TDO      1
SFO1     500.1330883 MHz
NUC1     1H
P1       10.91 usec
PLW1     25.00000000 W

F2 - Processing parameters
SI       65536
SF       500.1300121 MHz
WDW      EM
SSB      0
LB       0.30 Hz
GB       0
PC       1.00
    
```



**3ac**

125 MHz <sup>13</sup>C NMR  
CDCl<sub>3</sub>

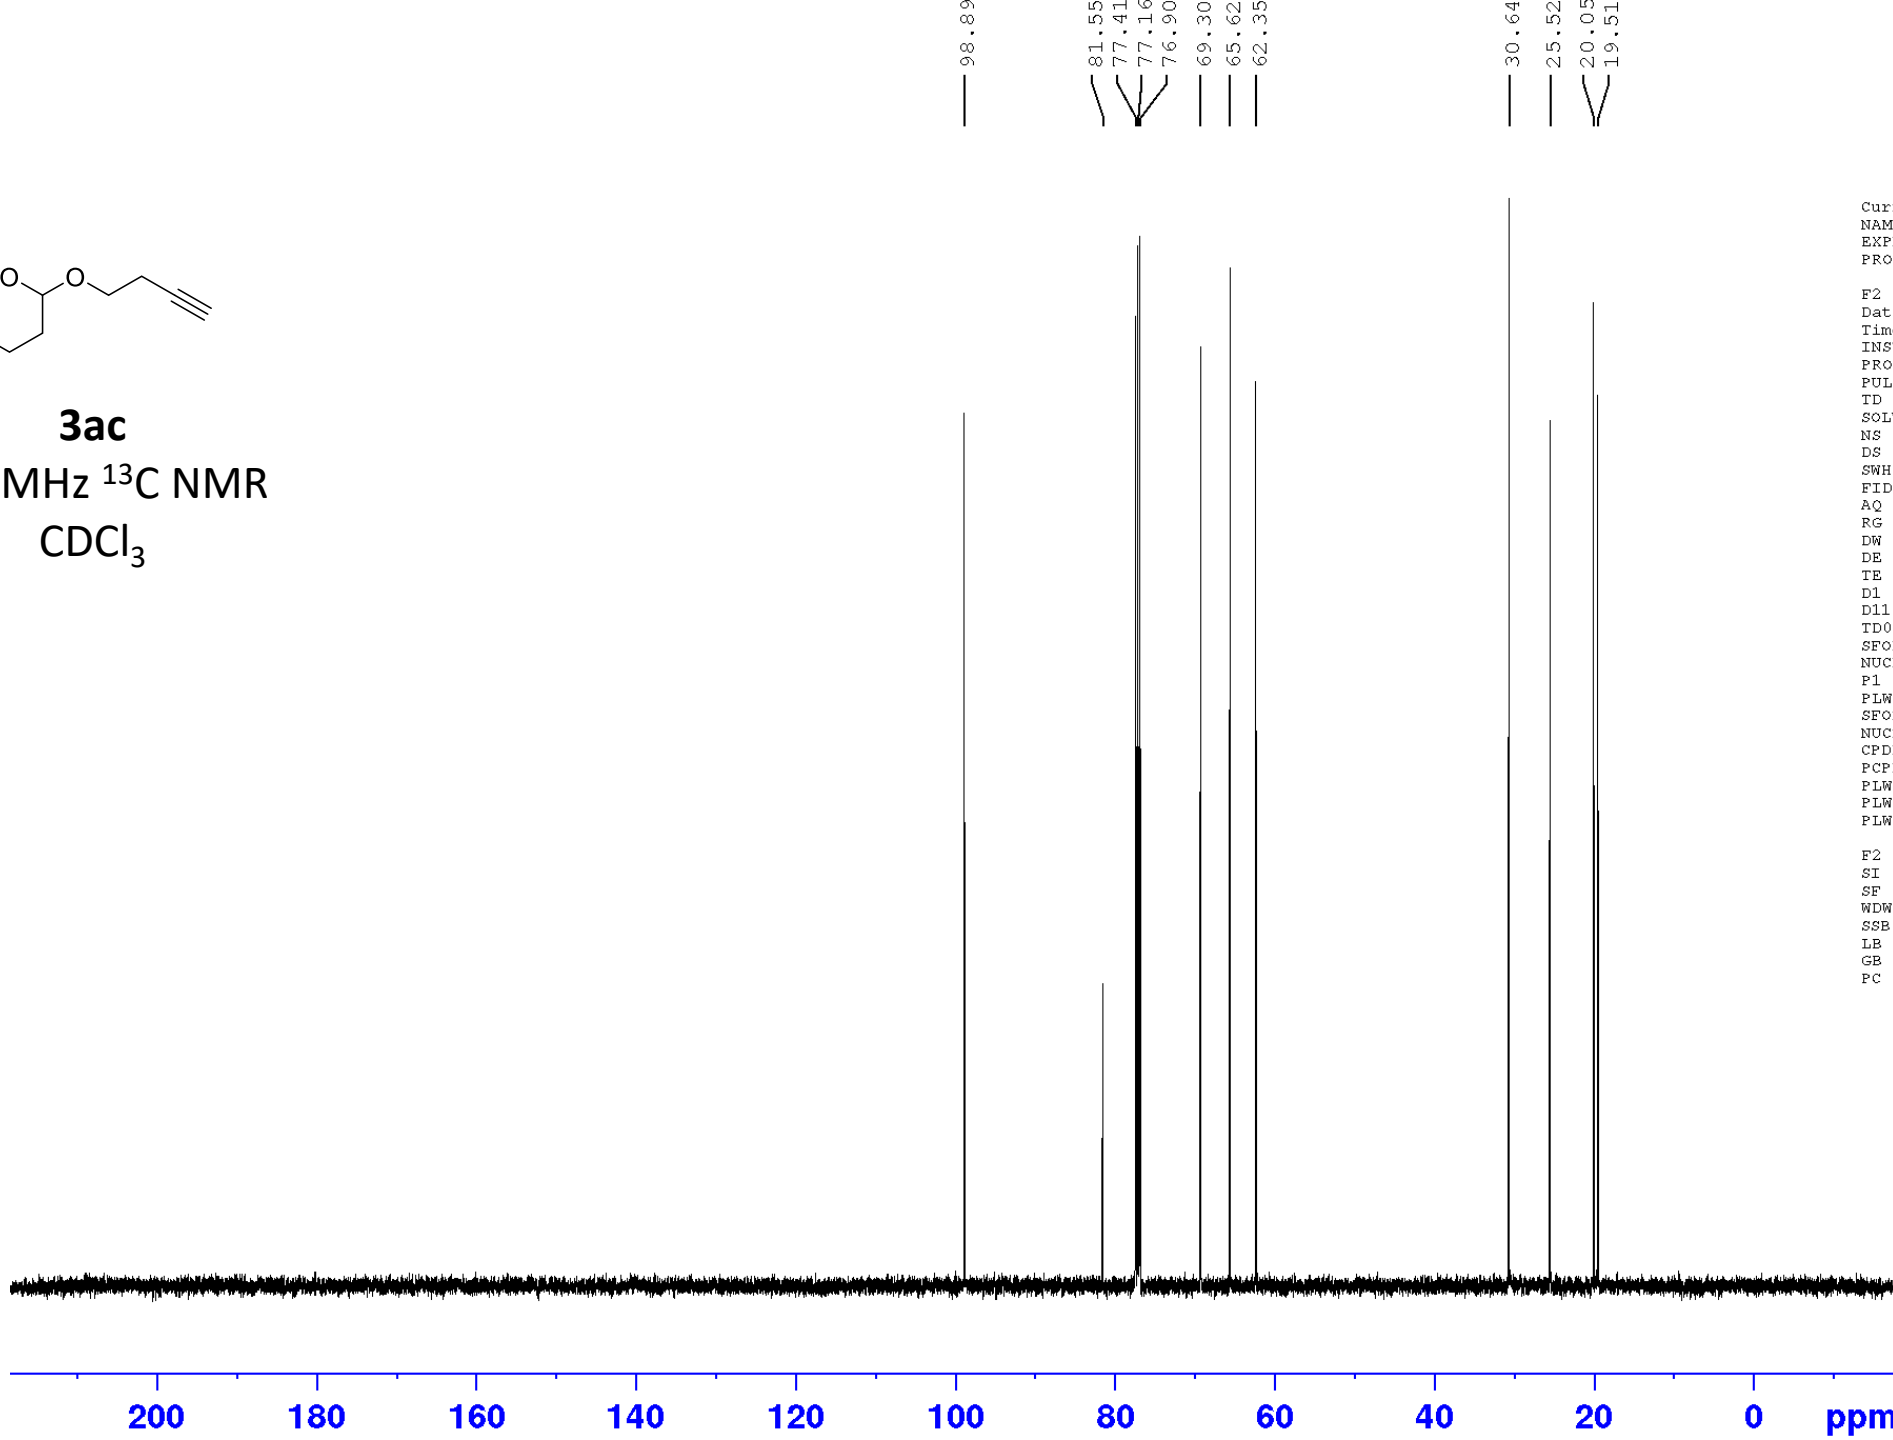

Current Data Parameters  
NAME vinn-4-149-10-islt-20200130  
EXPNO 2  
PROCNO 1

F2 - Acquisition Parameters  
Date\_ 20210130  
Time 18.27 h  
INSTRUM spect  
PROBHD z119470\_0283 (  
PULPROG zgpg30  
TD 65536  
SOLVENT CDCl3  
NS 128  
DS 4  
SWH 29761.904 Hz  
FIDRES 0.908261 Hz  
AQ 1.1010048 sec  
RG 206.72  
DW 16.800 usec  
DE 6.50 usec  
TE 295.2 K  
D1 2.00000000 sec  
D11 0.03000000 sec  
TD0 1  
SFO1 125.7703643 MHz  
NUC1 13C  
P1 9.75 usec  
PLW1 94.00000000 W  
SFO2 500.1320005 MHz  
NUC2 1H  
CPDPRG[2] waltz16  
PCPD2 80.00 usec  
PLW2 25.00000000 W  
PLW12 0.46495000 W  
PLW13 0.23387000 W

F2 - Processing parameters  
SI 32768  
SF 125.7577746 MHz  
WDW EM  
SSB 0  
LB 1.00 Hz  
GB 0  
PC 1.40

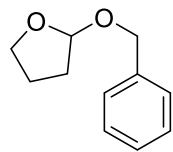

5a

500 MHz <sup>1</sup>H NMR  
CDCl<sub>3</sub>

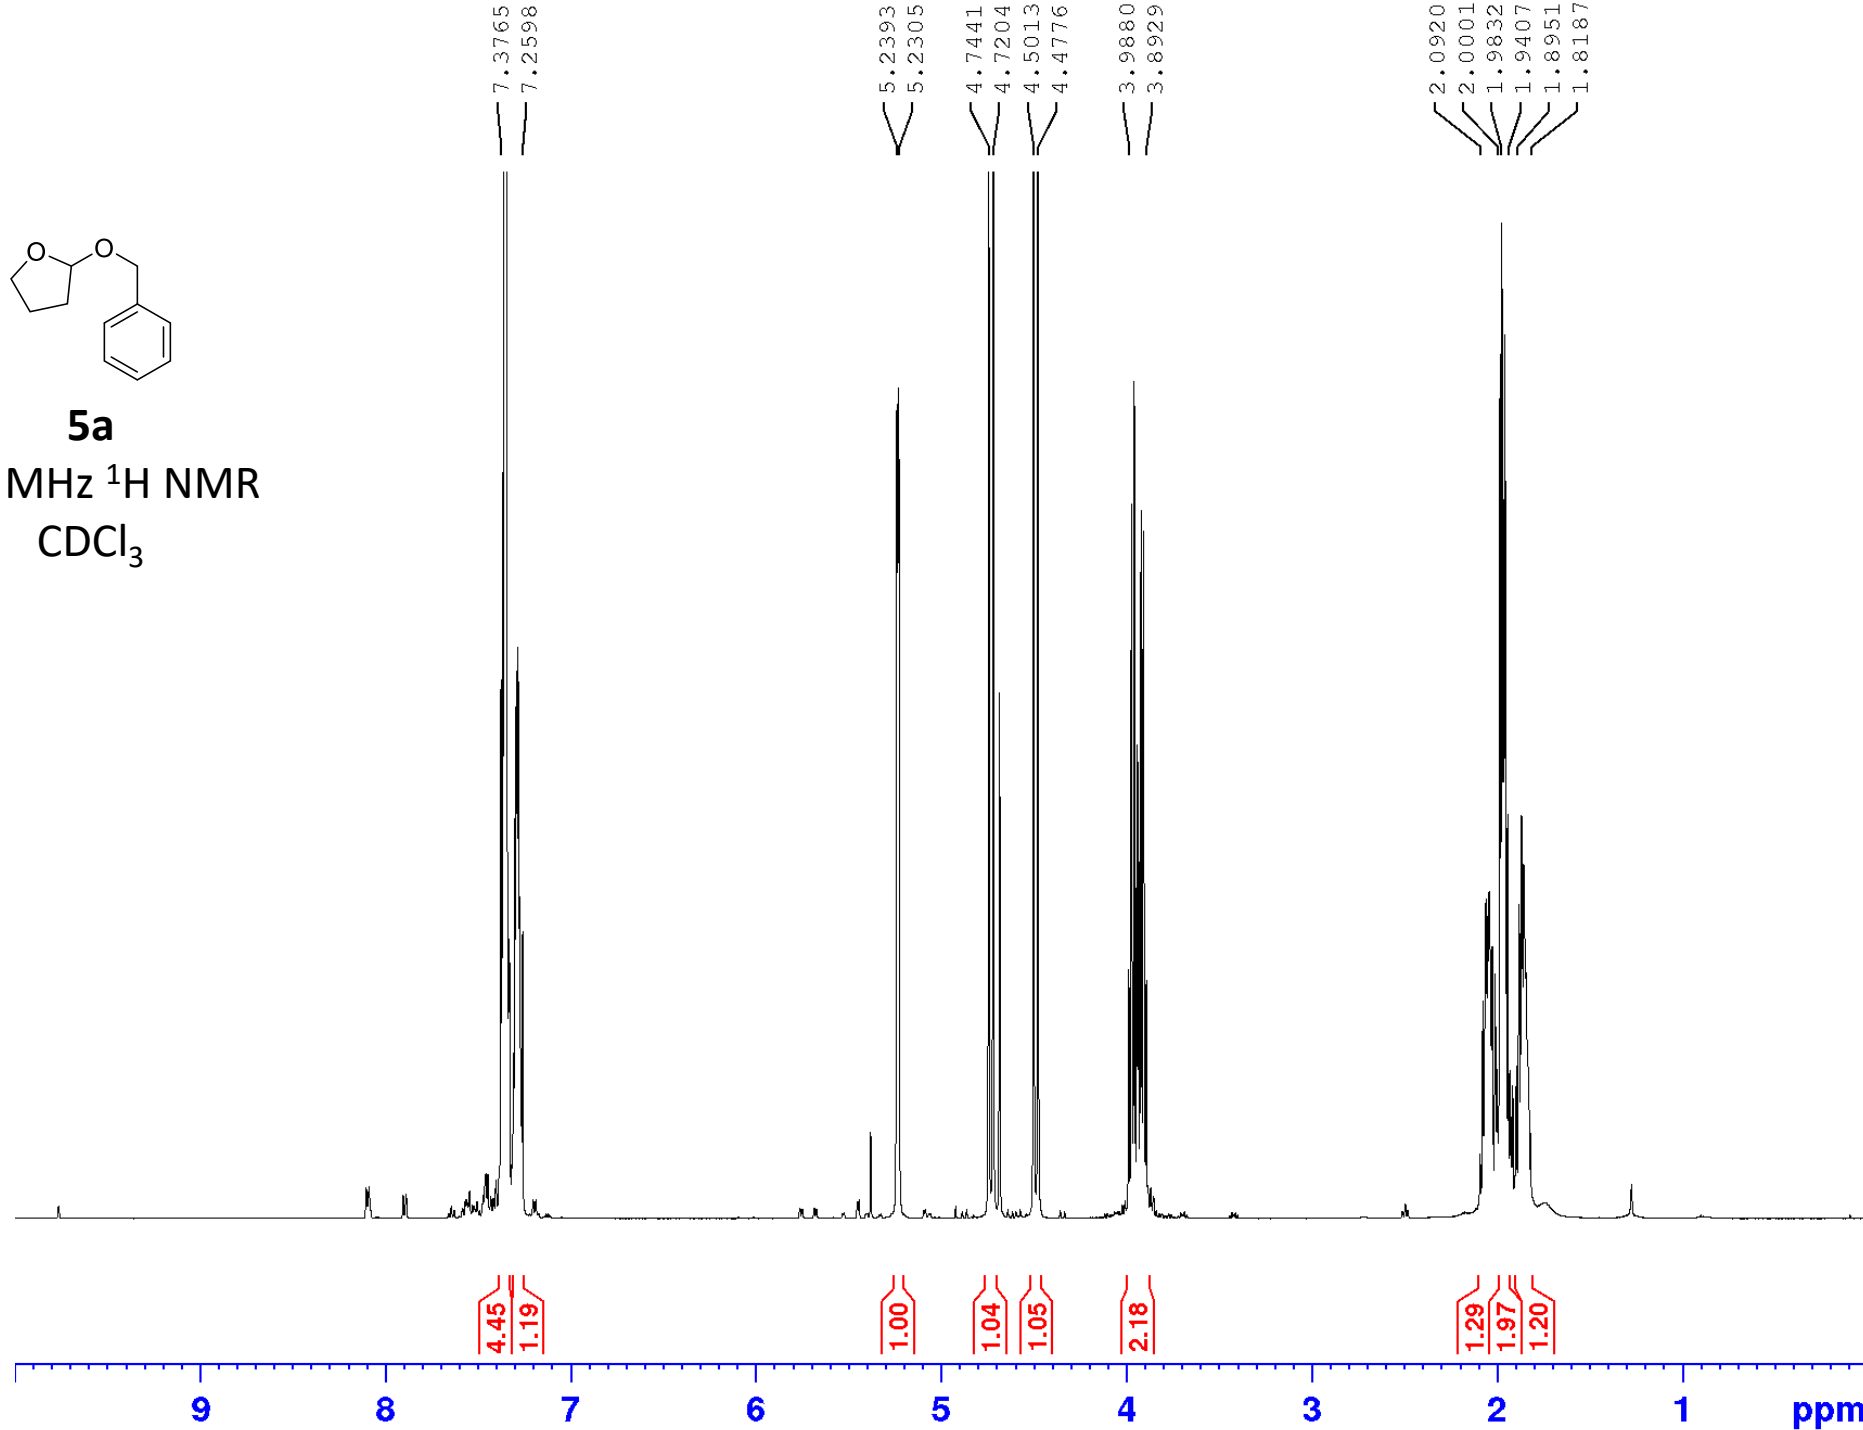

```
Current Data Parameters
NAME      vinn-4-131-2-isl-20201130
EXPNO    1
PROCNO   1

F2 - Acquisition Parameters
Date_    20201130
Time     16.28 h
INSTRUM  spect
PROBHD   zg30
PULPROG  zg30
TD       65536
SOLVENT  CDCl3
NS       16
DS       2
SWH      10000.000 Hz
FIDRES   0.305176 Hz
AQ       3.2767999 sec
RG       30.85
DW       50.000 usec
DE       6.50 usec
TE       295.1 K
D1       1.0000000 sec
TD0      1
SFO1     500.1330883 MHz
NUC1     1H
F1       10.91 usec
PLW1     25.0000000 W

F2 - Processing parameters
SI       65536
SF       500.1300121 MHz
WDW      EM
SSB      0
LB       0.30 Hz
GB       0
PC       1.00
```

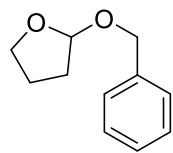

**5a**

125 MHz <sup>13</sup>C NMR  
CDCl<sub>3</sub>

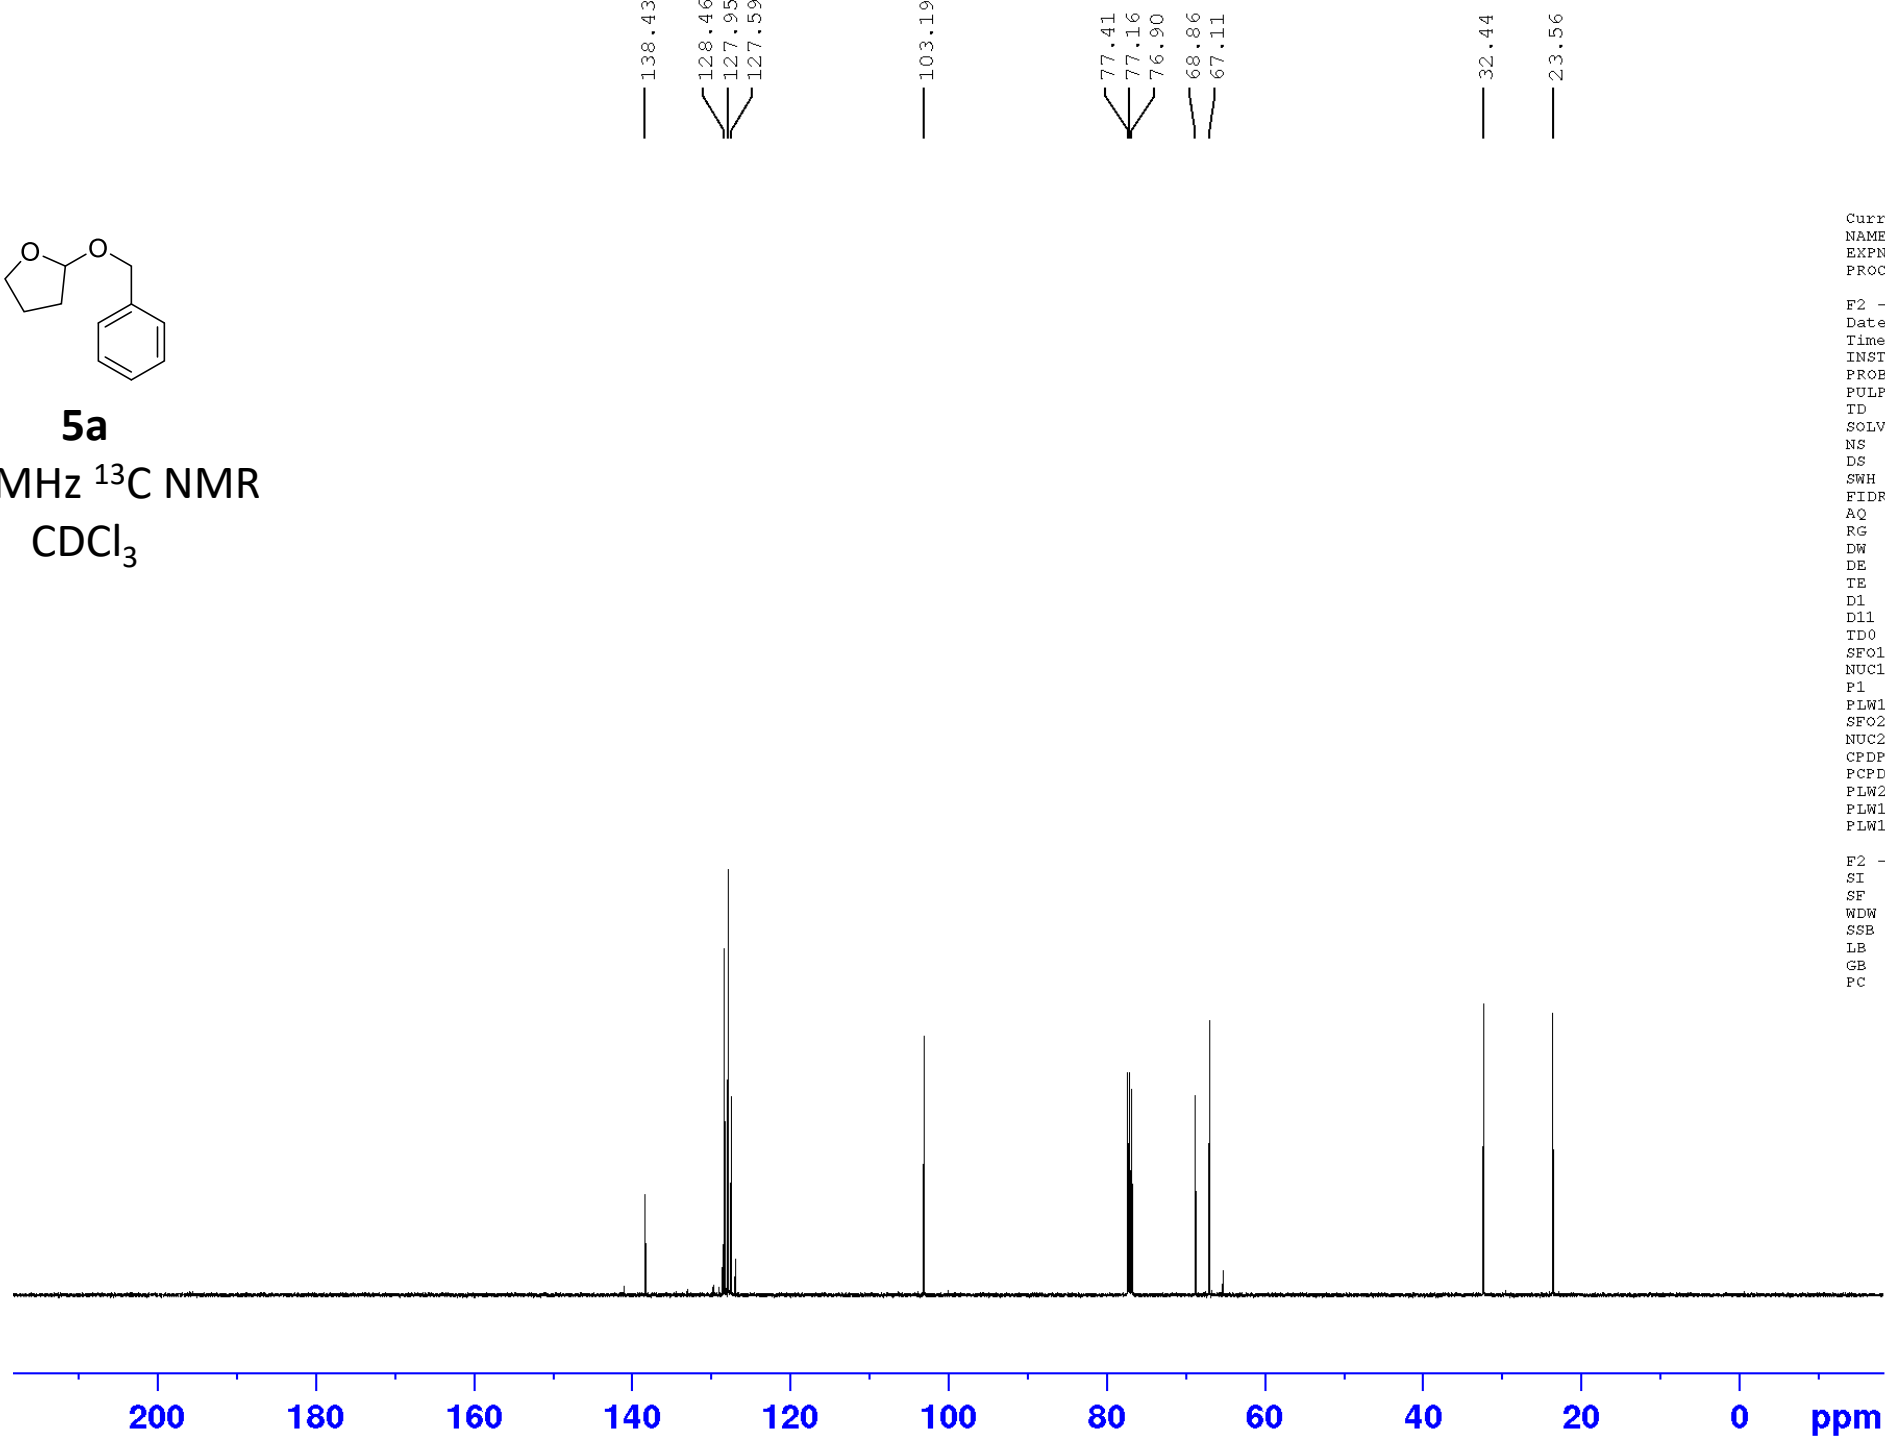

Current Data Parameters  
NAME vinn-4-131-2-isl-20201130  
EXPNO 2  
PROCNO 1

F2 - Acquisition Parameters  
Date\_ 20201130  
Time 16.35 h  
INSTRUM spect  
PROBHD Z119470\_0283 (  
PULPROG zgpg30  
TD 65536  
SOLVENT CDCl3  
NS 115  
DS 4  
SWH 29761.904 Hz  
FIDRES 0.908261 Hz  
AQ 1.1010048 sec  
RG 206.72  
DW 16.800 usec  
DE 6.50 usec  
TE 295.2 K  
D1 2.0000000 sec  
D11 0.03000000 sec  
TD0 1  
SFO1 125.7703643 MHz  
NUC1 13C  
P1 9.75 usec  
PLW1 94.0000000 W  
SFO2 500.1320005 MHz  
NUC2 1H  
CPDPRG[2] waltz16  
PCPD2 80.00 usec  
PLW2 25.0000000 W  
PLW12 0.46495000 W  
PLW13 0.23387000 W

F2 - Processing parameters  
SI 32768  
SF 125.7577804 MHz  
WDW EM  
SSB 0  
LB 1.00 Hz  
GB 0  
PC 1.40

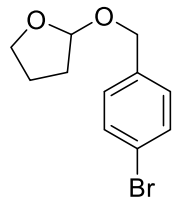

**5b**

500 MHz <sup>1</sup>H NMR  
CDCl<sub>3</sub>

7.4598  
7.4447  
7.2147  
7.1994

5.1901

4.6613  
4.6370  
4.4324  
4.4082

3.9479  
3.8700

2.0522  
1.9861  
1.9621  
1.9363  
1.8839  
1.8092

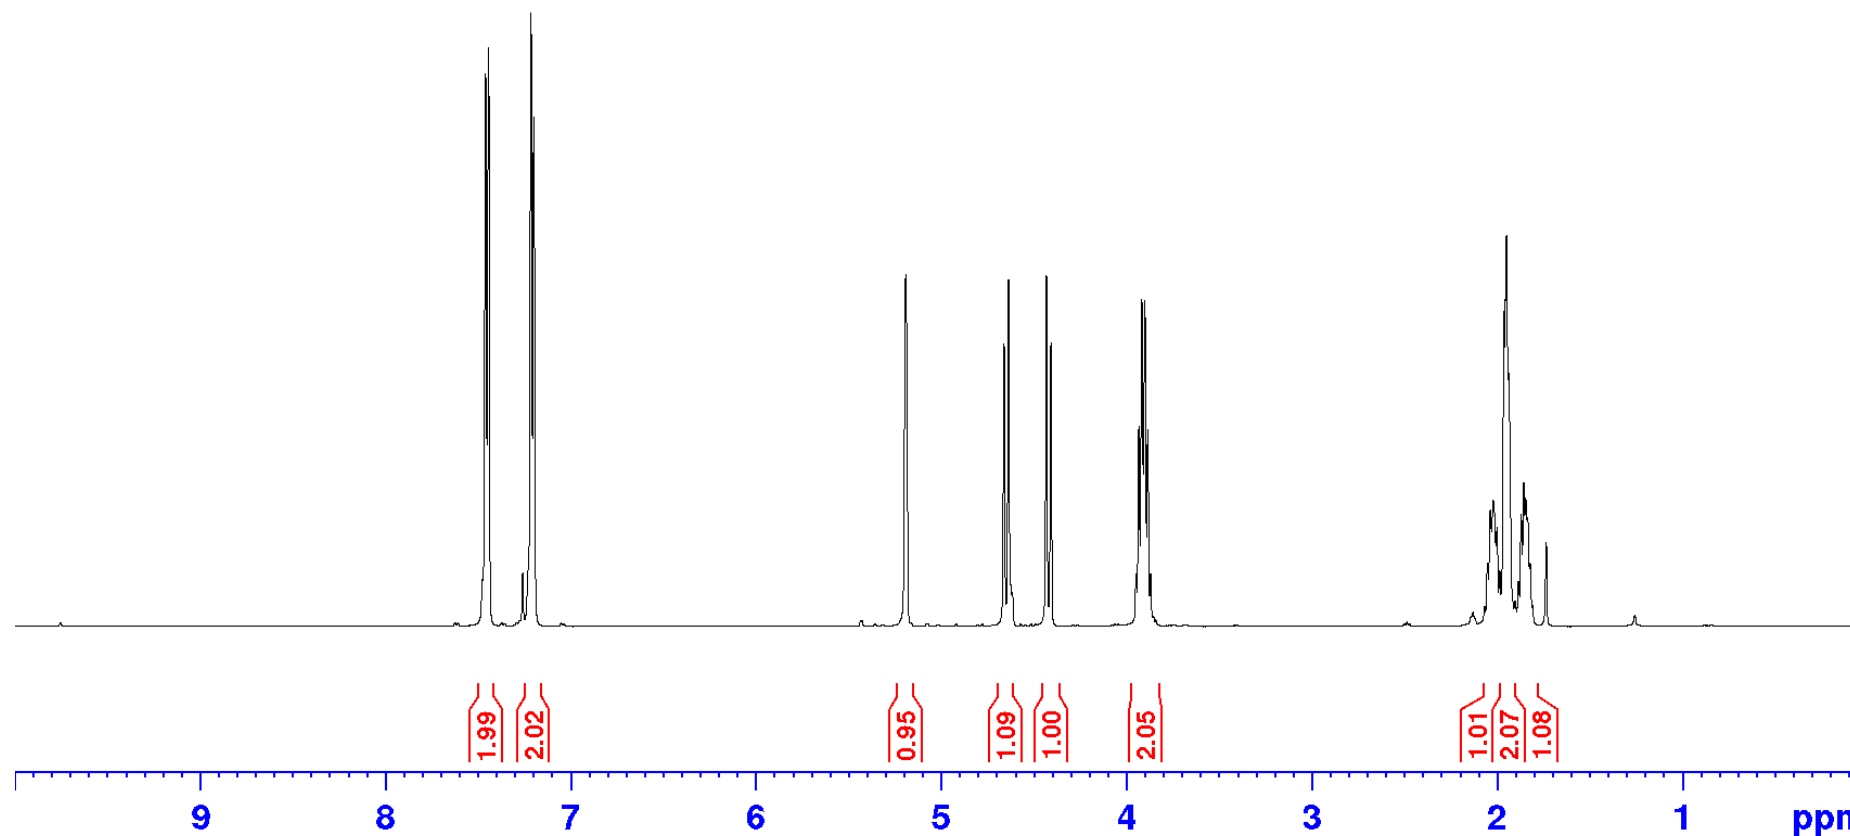

Current Data Parameters  
NAME vinn-4-137-8-ist-20201210  
EXPNO 1  
PROCNO 1

F2 - Acquisition Parameters  
Date\_ 20201211  
Time 5.37 h  
INSTRUM spect  
PROBHD z119470\_0283 {  
PULPROG zg30  
TD 65536  
SOLVENT cdcl3  
NS 16  
DS 2  
SWH 10000.000 Hz  
FIDRES 0.305176 Hz  
AQ 3.2767999 sec  
RG 30.85  
DW 50.000 usec  
DE 6.50 usec  
TE 295.1 K  
D1 1.0000000 sec  
TD0 1  
SFO1 500.1330883 MHz  
NUC1 1H  
P1 10.91 usec  
PLW1 25.0000000 W

F2 - Processing parameters  
SI 65536  
SF 500.1300122 MHz  
WDW EM  
SSB 0  
LB 0.30 Hz  
GB 0  
PC 1.00

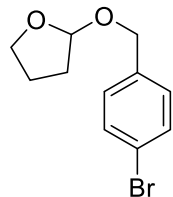

**5b**

125 MHz <sup>13</sup>C NMR  
CDCl<sub>3</sub>

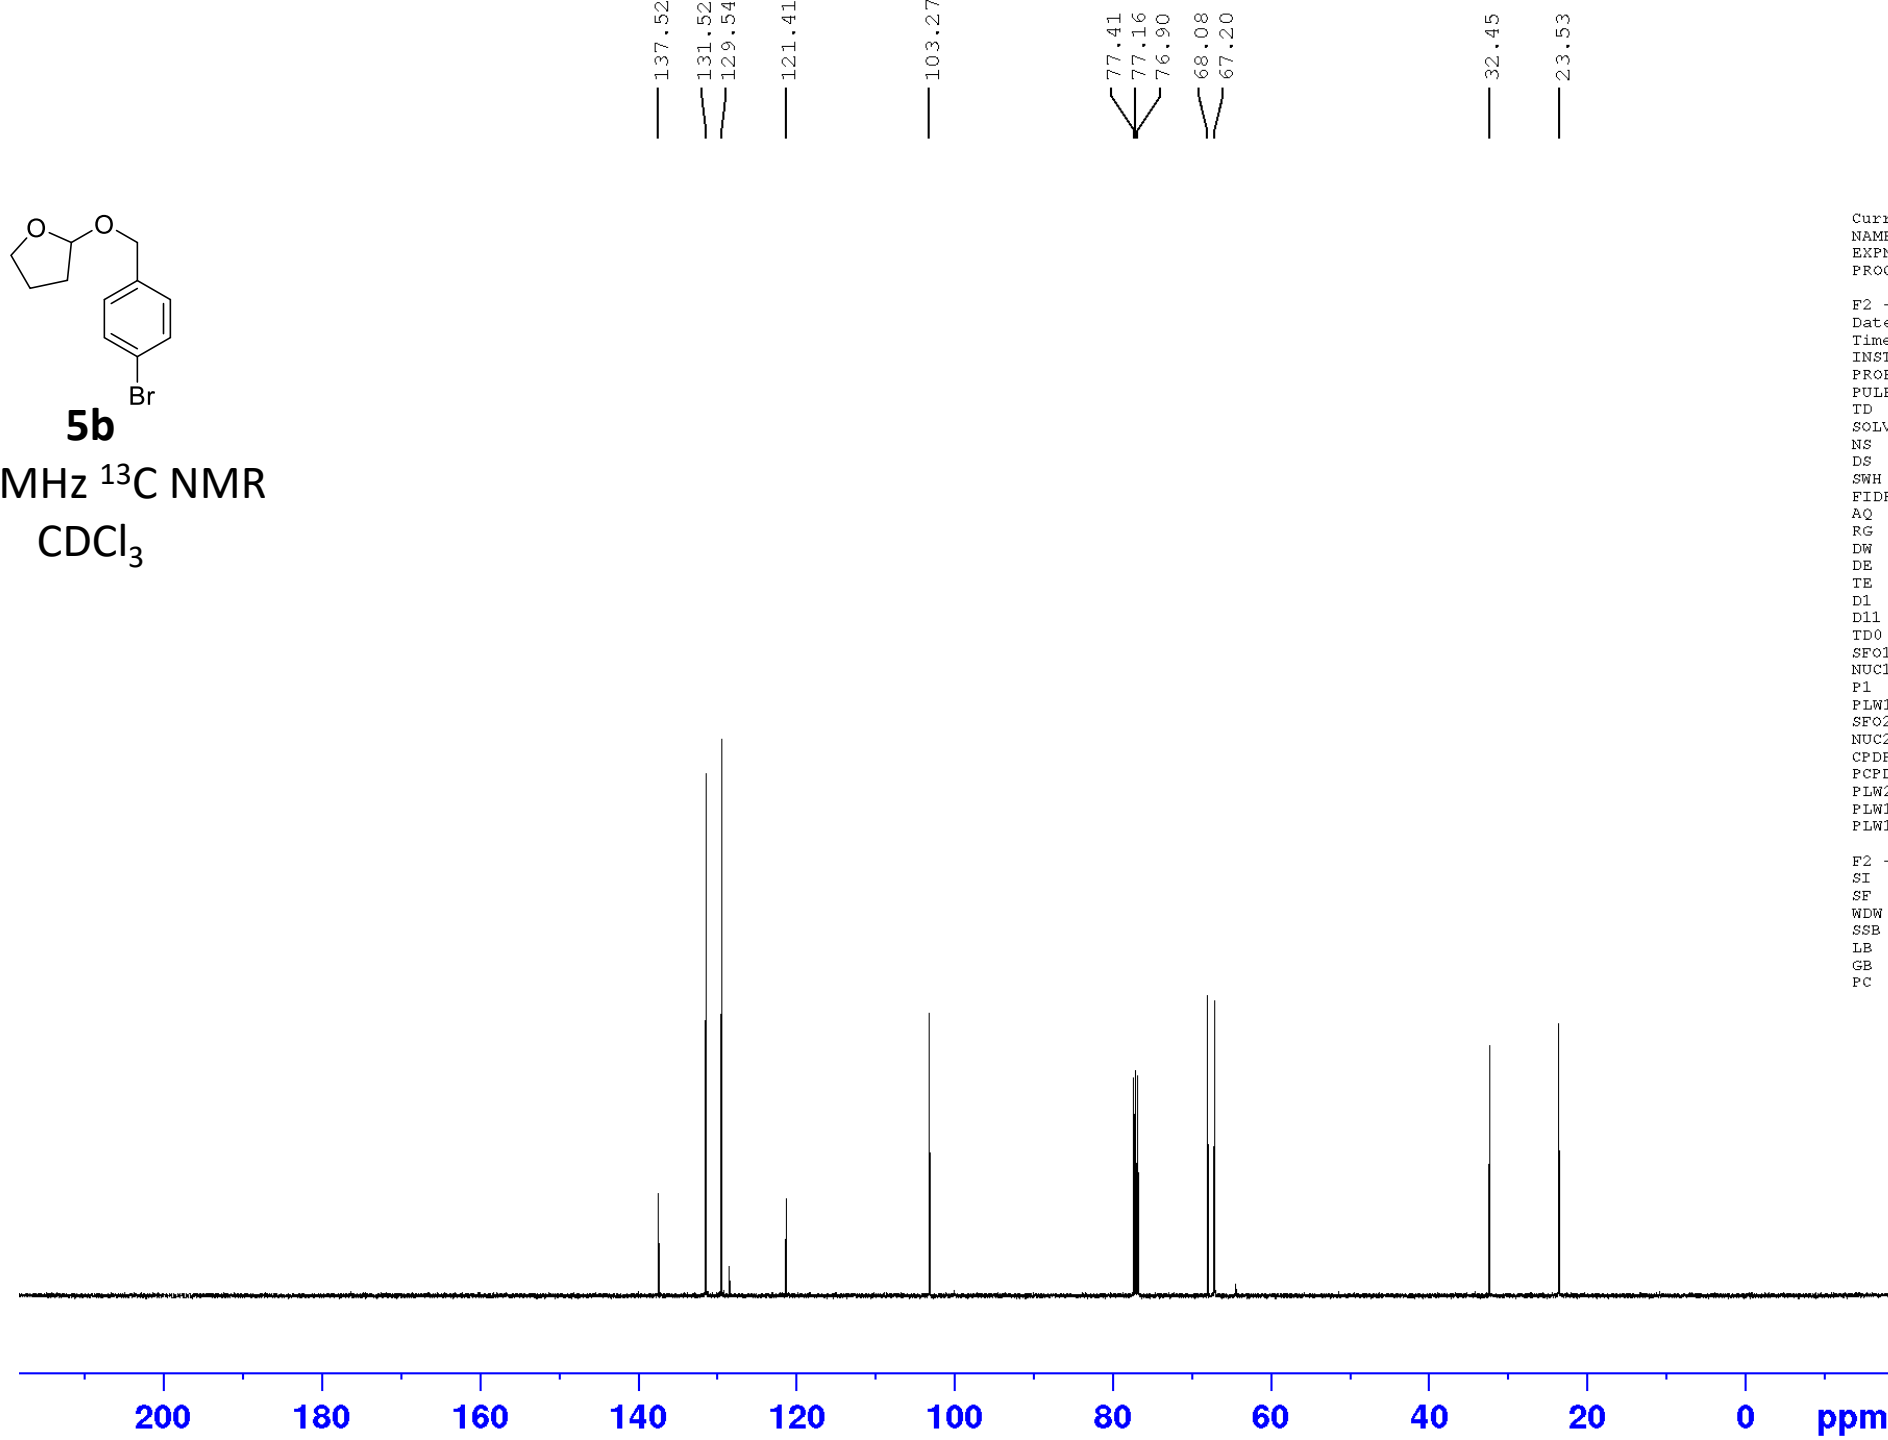

Current Data Parameters  
NAME vinn-4-137-8-isl-20201210  
EXPNO 2  
PROCNO 1

F2 - Acquisition Parameters  
Date\_ 20201211  
Time 5.43 h  
INSTRUM spect  
PROBHD Z119470\_0283 (  
PULPROG zgpg30  
TD 65536  
SOLVENT CDCl3  
NS 100  
DS 4  
SWH 29761.904 Hz  
FIDRES 0.908261 Hz  
AQ 1.1010048 sec  
RG 206.72  
DW 16.800 usec  
DE 6.50 usec  
TE 295.1 K  
D1 2.0000000 sec  
D11 0.0300000 sec  
TD0 1  
SFO1 125.7703643 MHz  
NUC1 13C  
P1 9.75 usec  
PLW1 94.0000000 W  
SFO2 500.1320005 MHz  
NUC2 1H  
CPDPRG2 waltz16  
PCPD2 80.00 usec  
PLW2 25.0000000 W  
PLW12 0.46495000 W  
PLW13 0.23387000 W

F2 - Processing parameters  
SI 32768  
SF 125.7577798 MHz  
WDW EM  
SSB 0  
LB 1.00 Hz  
GB 0  
PC 1.40



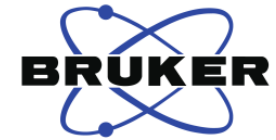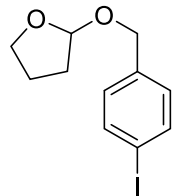

5c

500 MHz <sup>1</sup>H NMR

CDCl<sub>3</sub>

7.6619  
7.6469

7.0878  
7.0726

5.1856

4.6519  
4.6276

4.4231  
4.3987

3.9448  
3.9302  
3.9141  
3.8981  
3.8822  
3.8678  
3.8413

2.0645  
1.9841  
1.9593  
1.8990  
1.8823  
1.8074

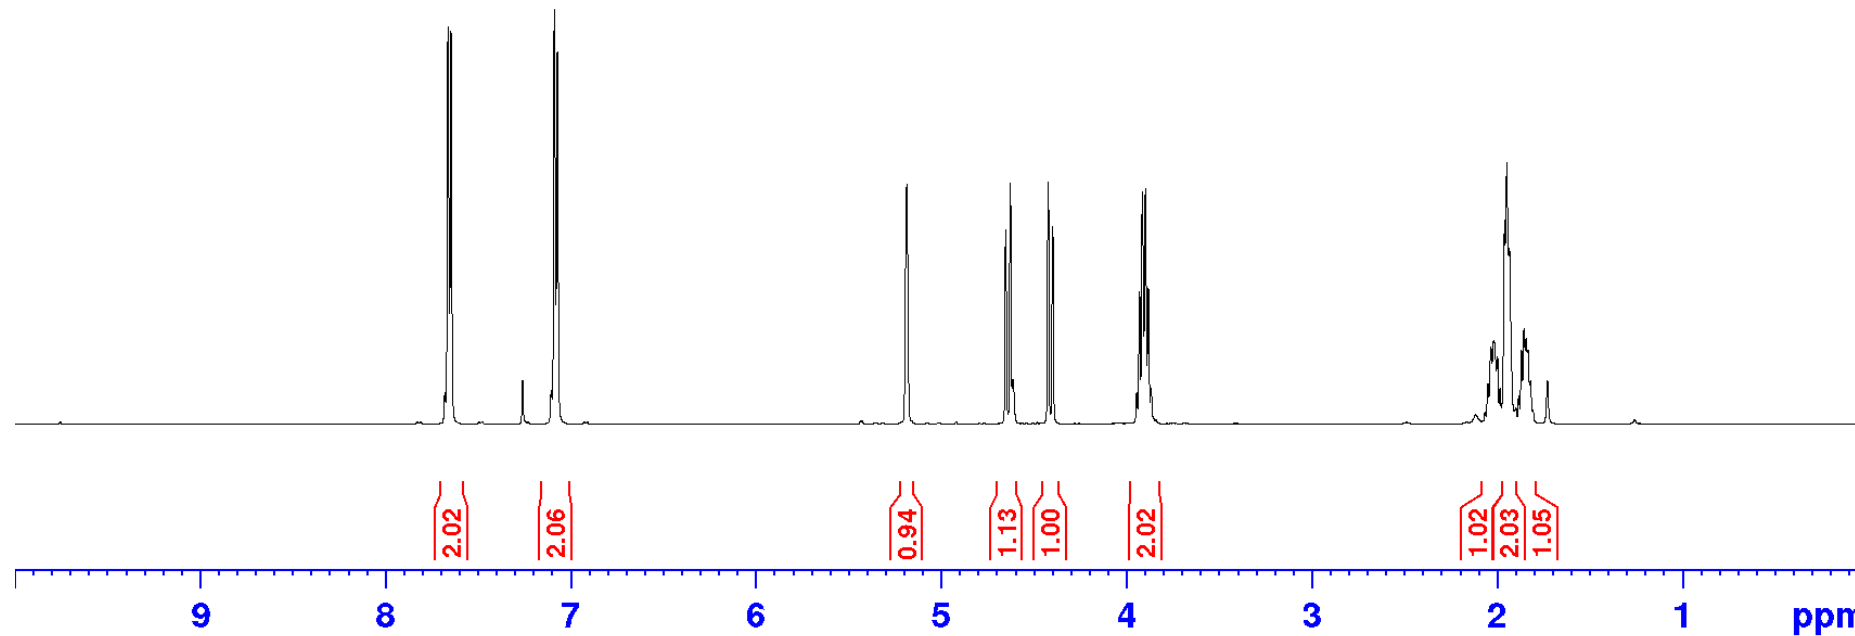

```
Current Data Parameters
NAME      vinn-4-137-9-isl-20201210
EXPNO     1
PROCNO    1

F2 - Acquisition Parameters
Date_     20201211
Time      5.47 h
INSTRUM   spect
PROBHD    zg30
PULPROG   zg30
TD        65536
SOLVENT   CDCl3
NS        16
DS        2
SWH       10000.000 Hz
FIDRES    0.305176 Hz
AQ        3.2767999 sec
RG        30.85
DW        50.000 usec
DE        6.50 usec
TE        295.1 K
D1        1.00000000 sec
TD0       1
SFO1      500.1330883 MHz
NUC1      1H
P1        10.91 usec
PLW1      25.00000000 W

F2 - Processing parameters
SI        65536
SF        500.1300122 MHz
WDW       EM
SSB       0
LB        0.30 Hz
GB        0
PC        1.00
```

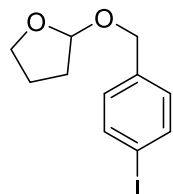

**5c**

125 MHz <sup>13</sup>C NMR  
CDCl<sub>3</sub>

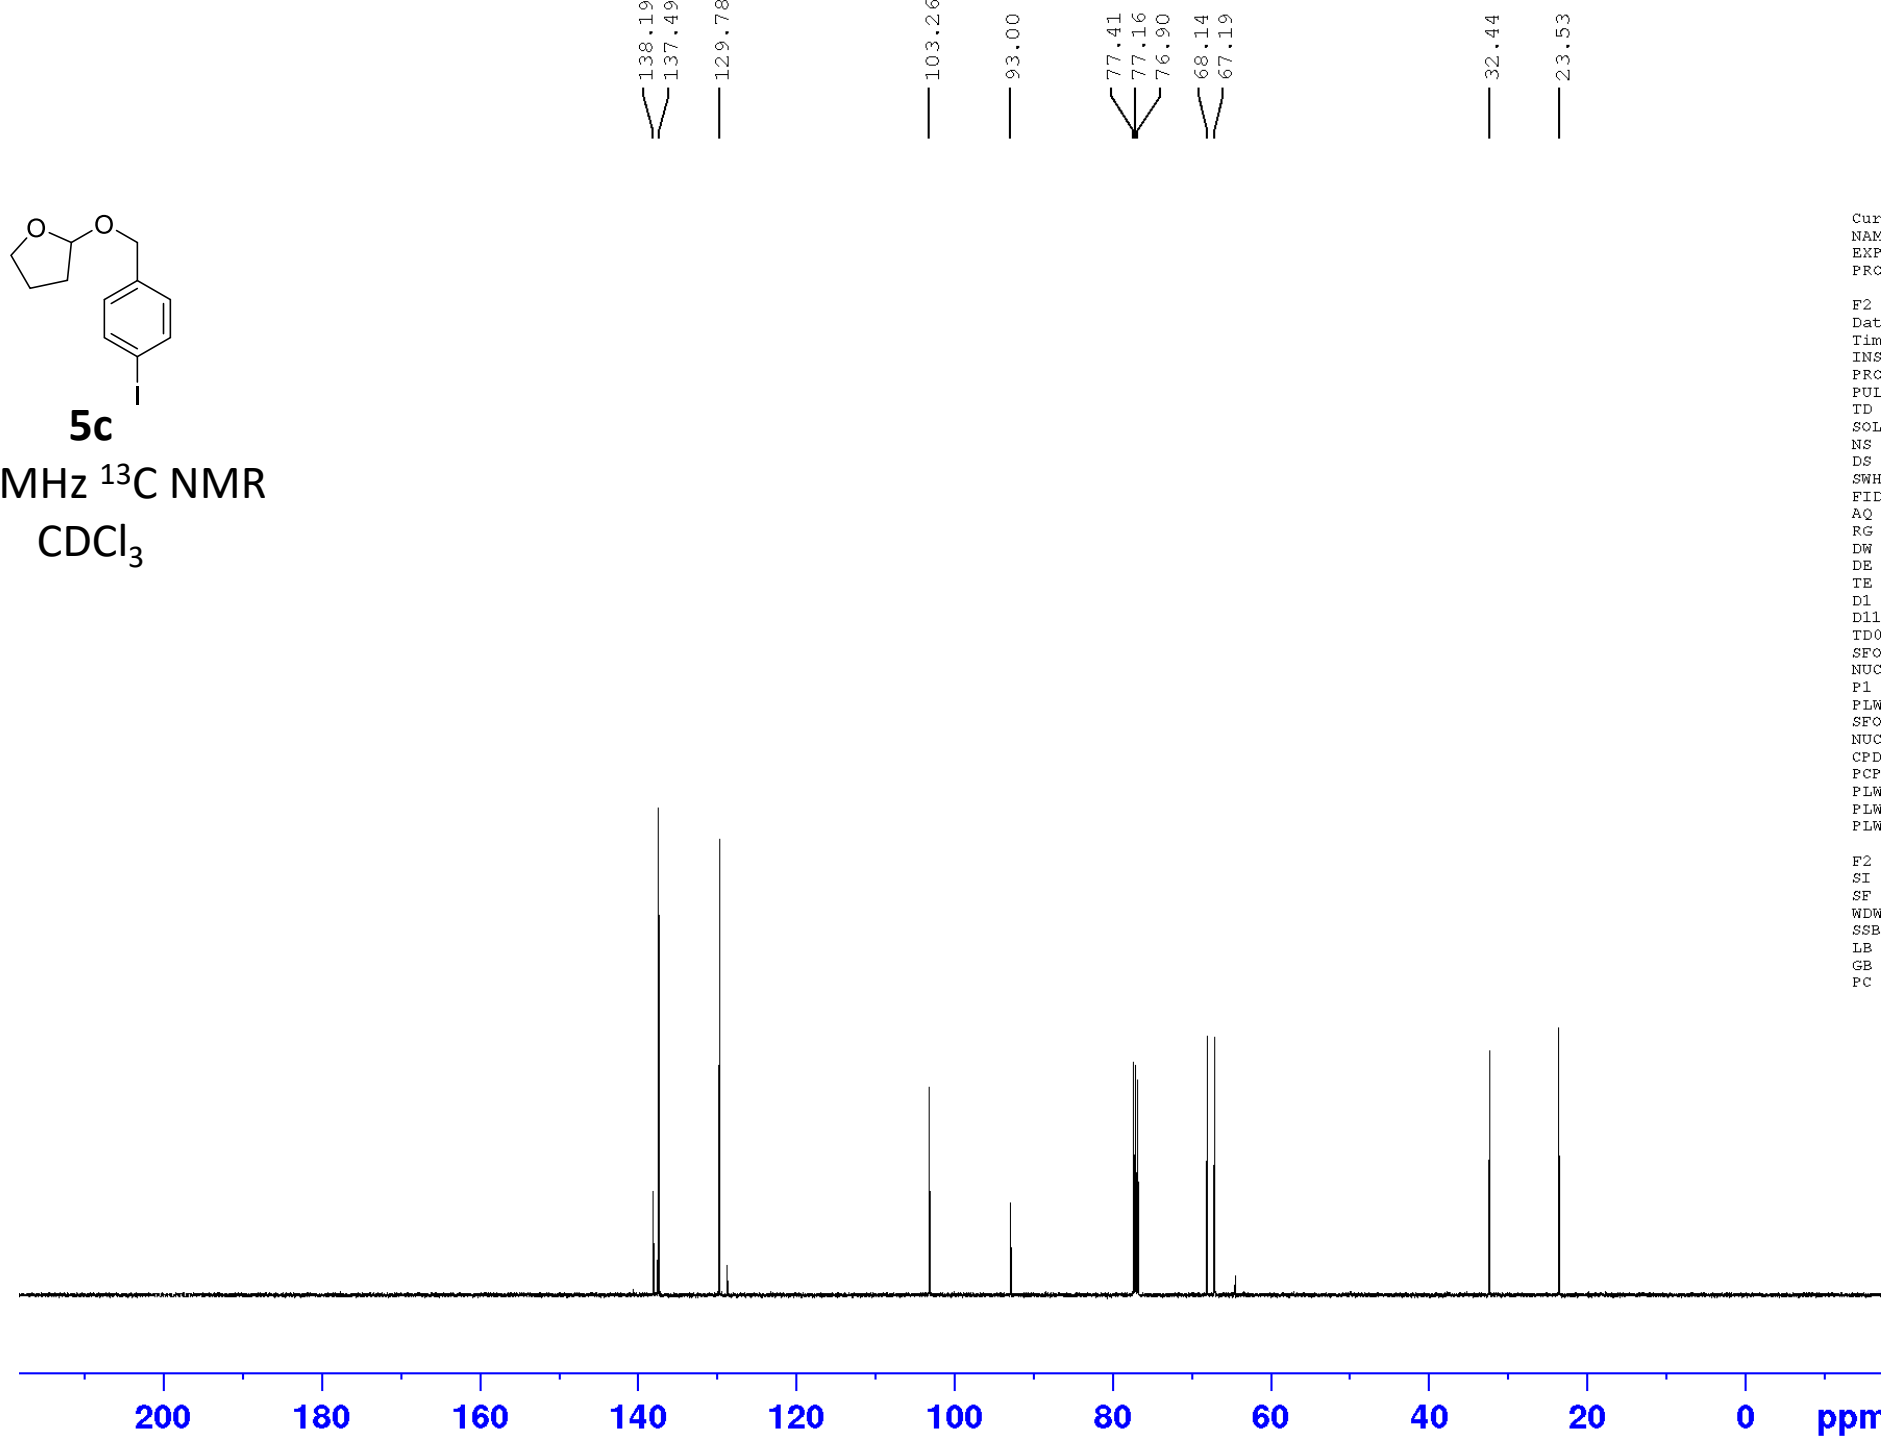

Current Data Parameters  
NAME vinn-4-137-9-isl-20201210  
EXPNO 2  
PROCNO 1

F2 - Acquisition Parameters

Date\_ 20201211  
Time 5.52 h  
INSTRUM spect  
PROBHD Z119470\_0283 (  
PULPROG zgpg30  
TD 65536  
SOLVENT CDCl3  
NS 100  
DS 4  
SWH 29761.904 Hz  
FIDRES 0.908261 Hz  
AQ 1.1010048 sec  
RG 206.72  
DW 16.800 usec  
DE 6.50 usec  
TE 295.2 K  
D1 2.0000000 sec  
D11 0.0300000 sec  
TD0 1  
SFO1 125.7703643 MHz  
NUC1 13C  
P1 9.75 usec  
PLW1 94.0000000 W  
SFO2 500.1320005 MHz  
NUC2 1H  
CPDPRG2 waltz16  
PCPD2 80.00 usec  
PLW2 25.0000000 W  
PLW12 0.46495000 W  
PLW13 0.23387000 W

F2 - Processing parameters

SI 32768  
SF 125.7577813 MHz  
WDW EM  
SSB 0  
LB 1.00 Hz  
GB 0  
PC 1.40

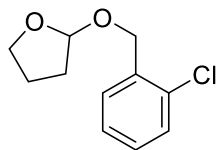

**5d**

500 MHz <sup>1</sup>H NMR  
CDCl<sub>3</sub>

7.4638  
7.4490  
7.3505  
7.3355  
7.2541  
7.2506  
7.1922

5.2647  
5.2566  
4.8178  
4.7919  
4.5874  
4.5615

3.9865  
3.8908

2.0992  
1.9324  
1.9012  
1.8215

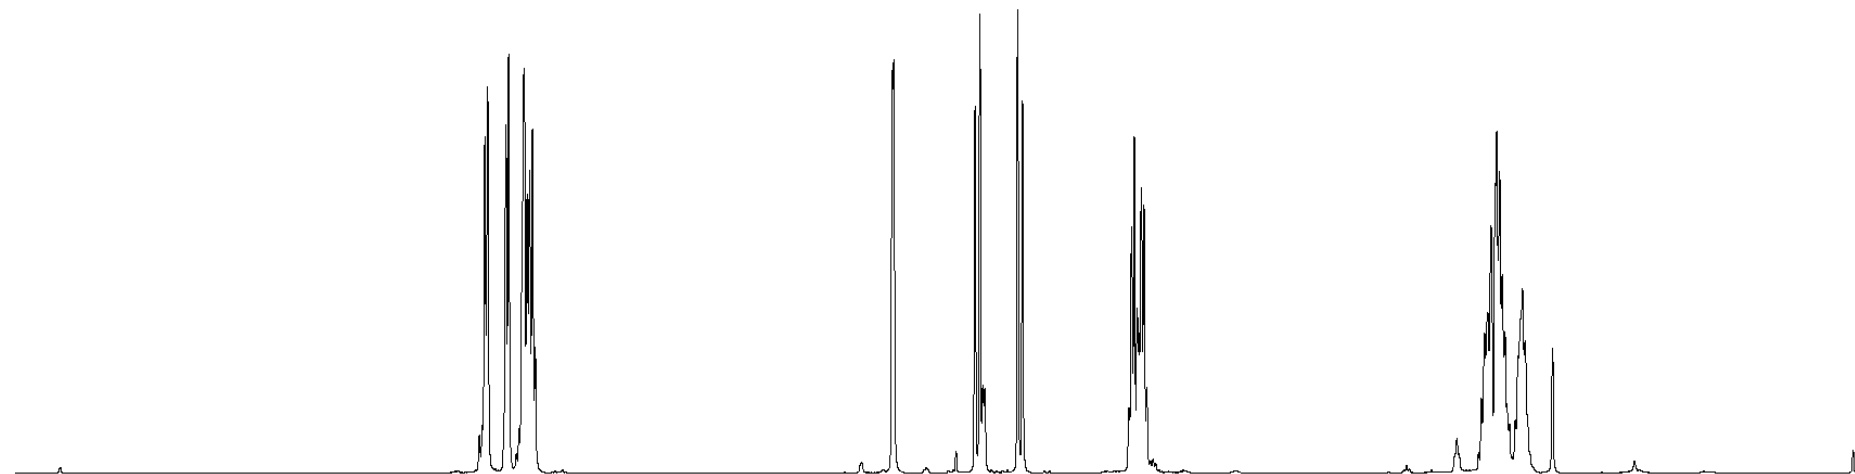

1.00  
1.02  
2.31

0.96

0.99

1.00

2.02

3.08

1.10

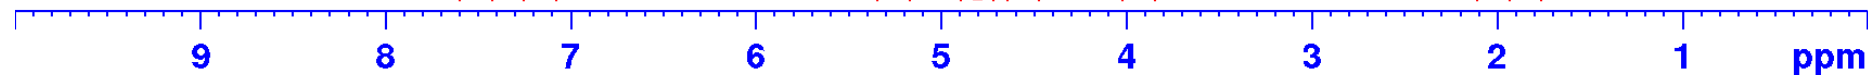

```
Current Data Parameters
NAME vinn-4-137-17-ialt-2020121
EXPNO 1
PROCNO 1

F2 - Acquisition Parameters
Date_ 20201211
Time 6.43 h
INSTRUM spect
PROBHD z119470_0283 {
PULPROG zg30
TD 65536
SOLVENT cdcl3
NS 16
DS 2
SWH 10000.000 Hz
FIDRES 0.305176 Hz
AQ 3.2767999 sec
RG 30.85
DW 50.000 usec
DE 6.50 usec
TE 295.2 K
D1 1.00000000 sec
TD0 1
SFO1 500.1330883 MHz
NUC1 1H
P1 10.91 usec
PLW1 25.00000000 W

F2 - Processing parameters
SI 65536
SF 500.1300133 MHz
WDW EM
SSB 0
LB 0.30 Hz
GB 0
PC 1.00
```

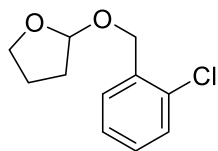

**5d**

125 MHz <sup>13</sup>C NMR  
CDCl<sub>3</sub>

136.27  
133.16  
129.37  
129.27  
128.67  
126.79  
  
103.71  
  
77.41  
77.16  
76.90  
67.29  
66.17  
  
32.49  
23.54

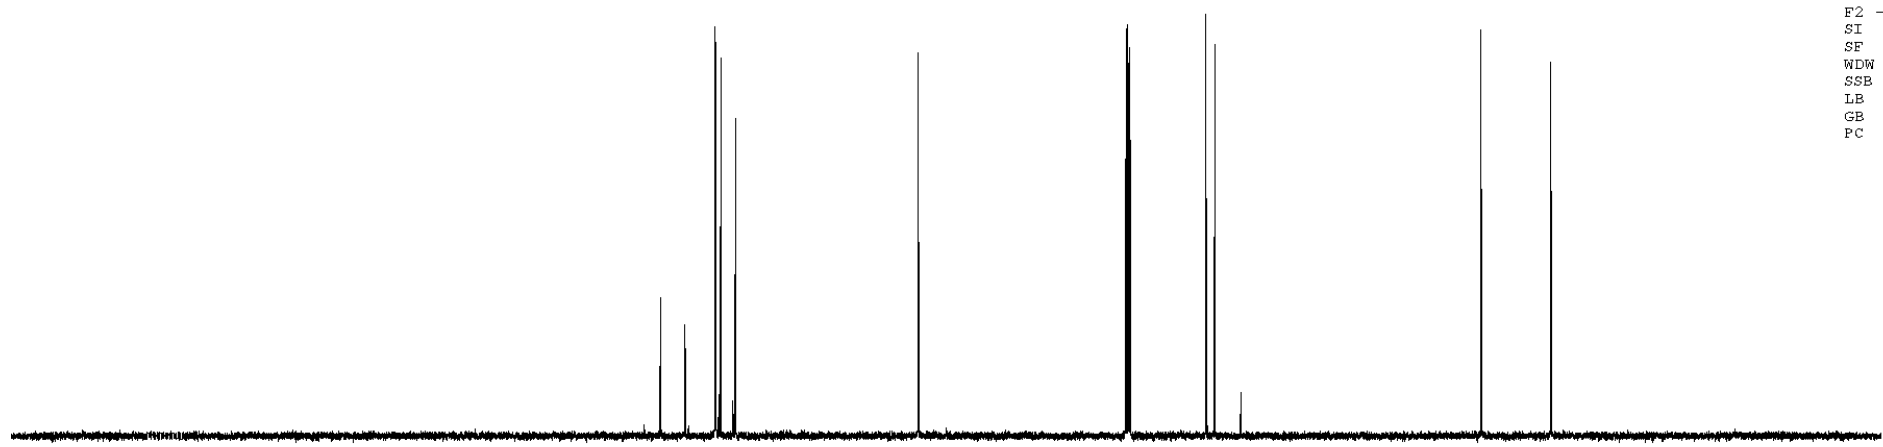

Current Data Parameters  
NAME vinn-4-137-17-islt-20201210  
EXPNO 2  
PROCNO 1

F2 - Acquisition Parameters  
Date\_ 20201211  
Time 6.49 h  
INSTRUM spect  
PROBHD Z119470\_0283 (  
PULPROG zgpg30  
TD 65536  
SOLVENT CDCl3  
NS 100  
DS 4  
SWH 29761.904 Hz  
FIDRES 0.908261 Hz  
AQ 1.1010048 sec  
RG 206.72  
DW 16.800 usec  
DE 6.50 usec  
TE 295.2 K  
D1 2.0000000 sec  
D11 0.03000000 sec  
TD0 1  
SFO1 125.7703643 MHz  
NUC1 13C  
P1 9.75 usec  
PLW1 94.0000000 W  
SFO2 500.1320005 MHz  
NUC2 1H  
CPDPRG[2] waltz16  
PCPD2 80.00 usec  
PLW2 25.0000000 W  
PLW12 0.46495000 W  
PLW13 0.23387000 W

F2 - Processing parameters  
SI 32768  
SF 125.7577777 MHz  
WDW EM  
SSB 0  
LB 1.00 Hz  
GB 0  
PC 1.40

200 180 160 140 120 100 80 60 40 20 0 ppm

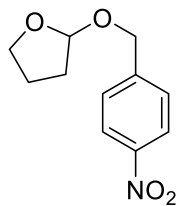

5e

500 MHz <sup>1</sup>H NMR  
CDCl<sub>3</sub>

8.1819  
8.1662  
7.4862  
7.4703  
5.2124  
4.7998  
4.7729  
4.5800  
4.5533  
3.9368  
3.8696  
2.0682  
1.9370  
1.9075  
1.8667

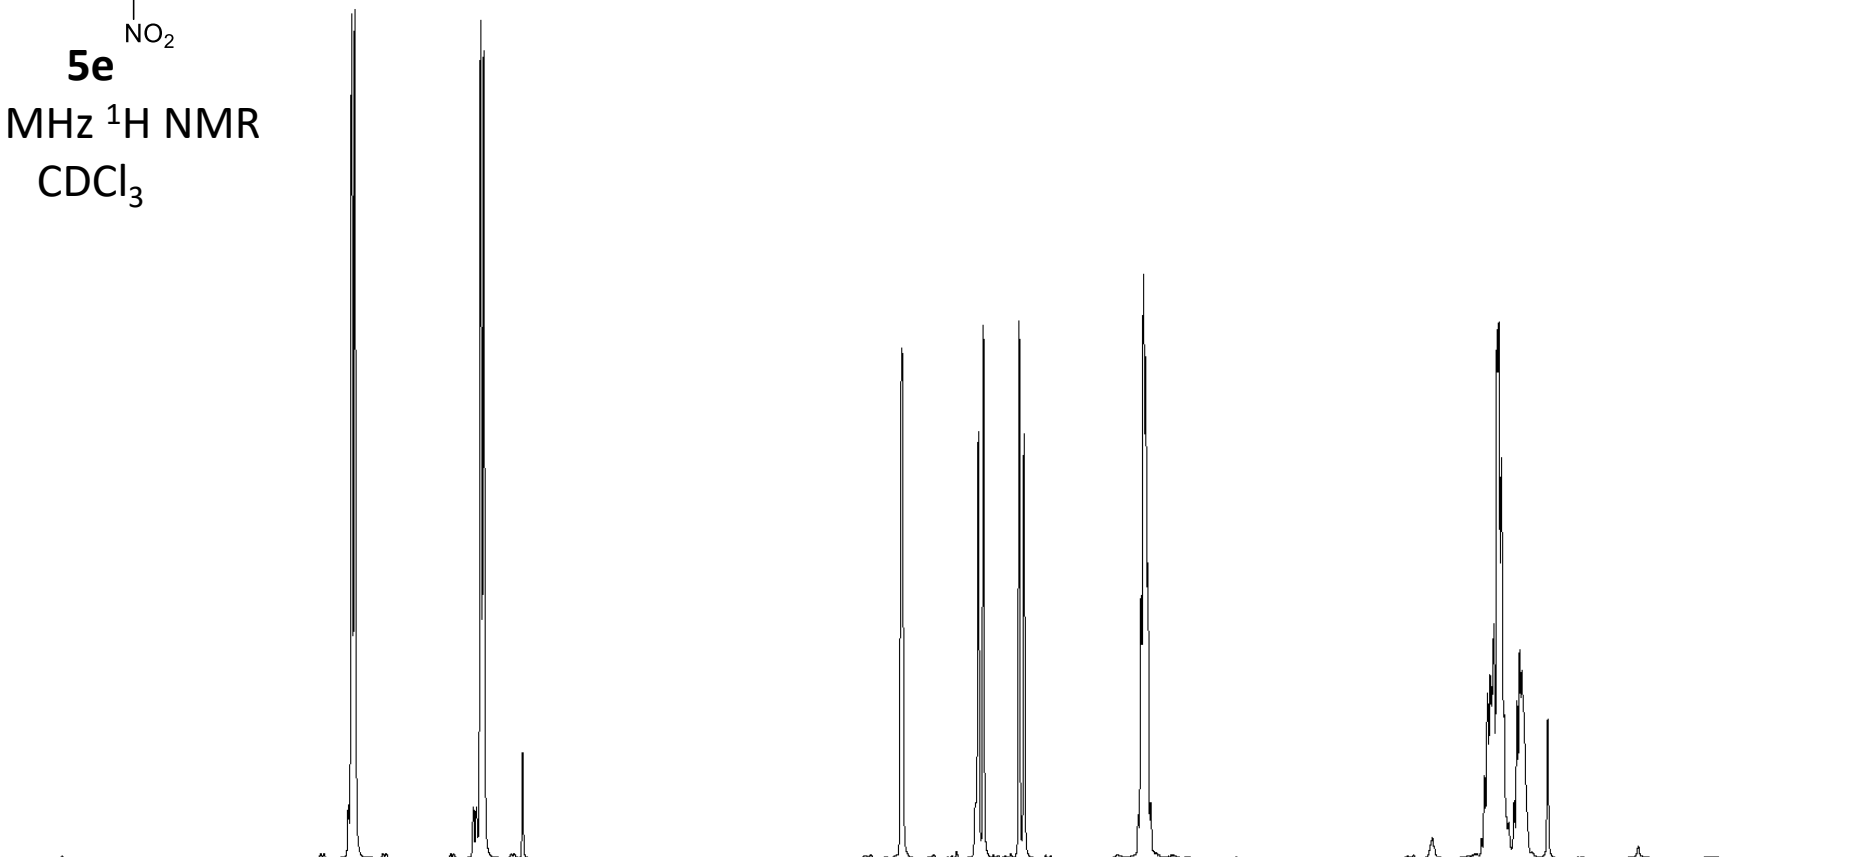

1.99  
1.97  
0.95  
1.11  
1.00  
1.99  
3.01  
1.03

9 8 7 6 5 4 3 2 1 ppm

Current Data Parameters  
NAME vinn-4-137-11-ialt-2020121  
EXPNO 1  
PROCNO 1  
F2 - Acquisition Parameters  
Date\_ 20201211  
Time 6.05 h  
INSTRUM spect  
PROBHD z119470\_0283 {  
PULPROG zg30  
TD 65536  
SOLVENT cdcl3  
NS 16  
DS 2  
SWH 10000.000 Hz  
FIDRES 0.305176 Hz  
AQ 3.2767999 sec  
RG 30.85  
DW 50.000 usec  
DE 6.50 usec  
TE 295.1 K  
D1 1.00000000 sec  
TDO 1  
SFO1 500.1330883 MHz  
NUC1 1H  
P1 10.91 usec  
PLW1 25.00000000 W  
F2 - Processing parameters  
SI 65536  
SF 500.1300121 MHz  
WDW EM  
SSB 0  
LB 0.30 Hz  
GB 0  
PC 1.00

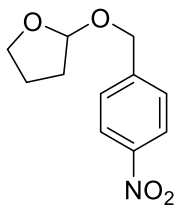

**5e**

125 MHz <sup>13</sup>C NMR  
CDCl<sub>3</sub>

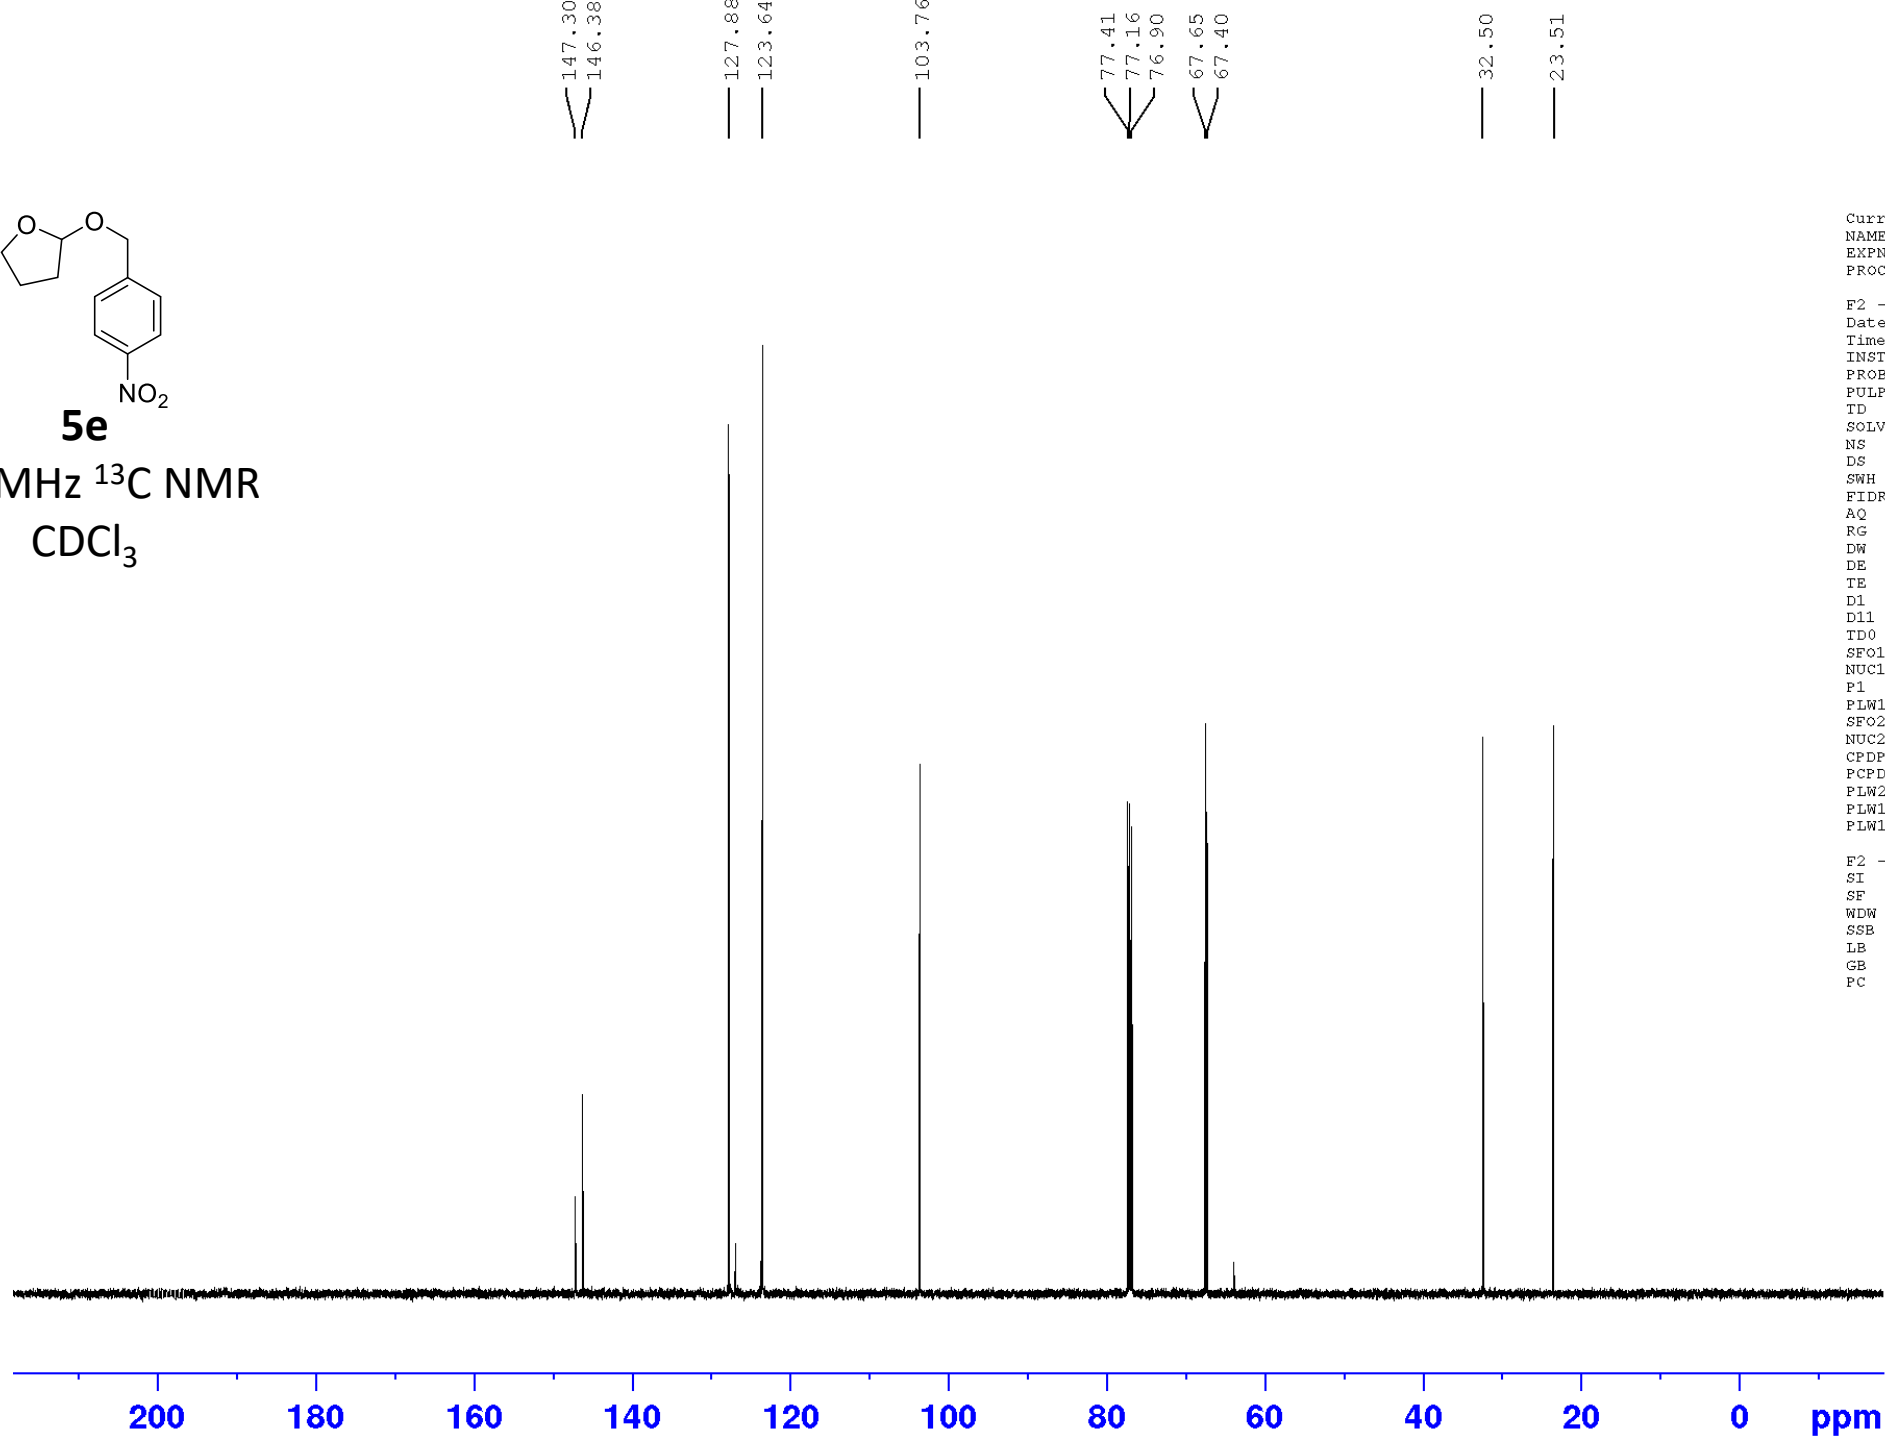

Current Data Parameters  
 NAME vinn-4-137-11-islt-20201210  
 EXPNO 2  
 PROCNO 1

F2 - Acquisition Parameters  
 Date\_ 20201211  
 Time 6.11 h  
 INSTRUM spect  
 PROBHD Z119470\_0283 (  
 PULPROG zgpg30  
 TD 65536  
 SOLVENT CDCl3  
 NS 100  
 DS 4  
 SWH 29761.904 Hz  
 FIDRES 0.908261 Hz  
 AQ 1.1010048 sec  
 RG 206.72  
 DW 16.800 usec  
 DE 6.50 usec  
 TE 295.2 K  
 D1 2.0000000 sec  
 D11 0.0300000 sec  
 TD0 1  
 SFO1 125.7703643 MHz  
 NUC1 13C  
 P1 9.75 usec  
 PLW1 94.0000000 W  
 SFO2 500.1320005 MHz  
 NUC2 1H  
 CPDPRG[2] waltz16  
 PCPD2 80.00 usec  
 PLW2 25.0000000 W  
 PLW12 0.46495000 W  
 PLW13 0.23387000 W

F2 - Processing parameters  
 SI 32768  
 SF 125.7577786 MHz  
 WDW EM  
 SSB 0  
 LB 1.00 Hz  
 GB 0  
 PC 1.40

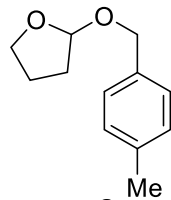

5f

500 MHz <sup>1</sup>H NMR  
CDCl<sub>3</sub>

7.2575  
7.2424  
7.1693  
7.1543

5.2274  
5.2242

4.7007  
4.6774  
4.4626  
4.4394

3.9857  
3.8902

2.3523  
2.0841  
2.0035  
1.9831  
1.9048  
1.8876  
1.8119

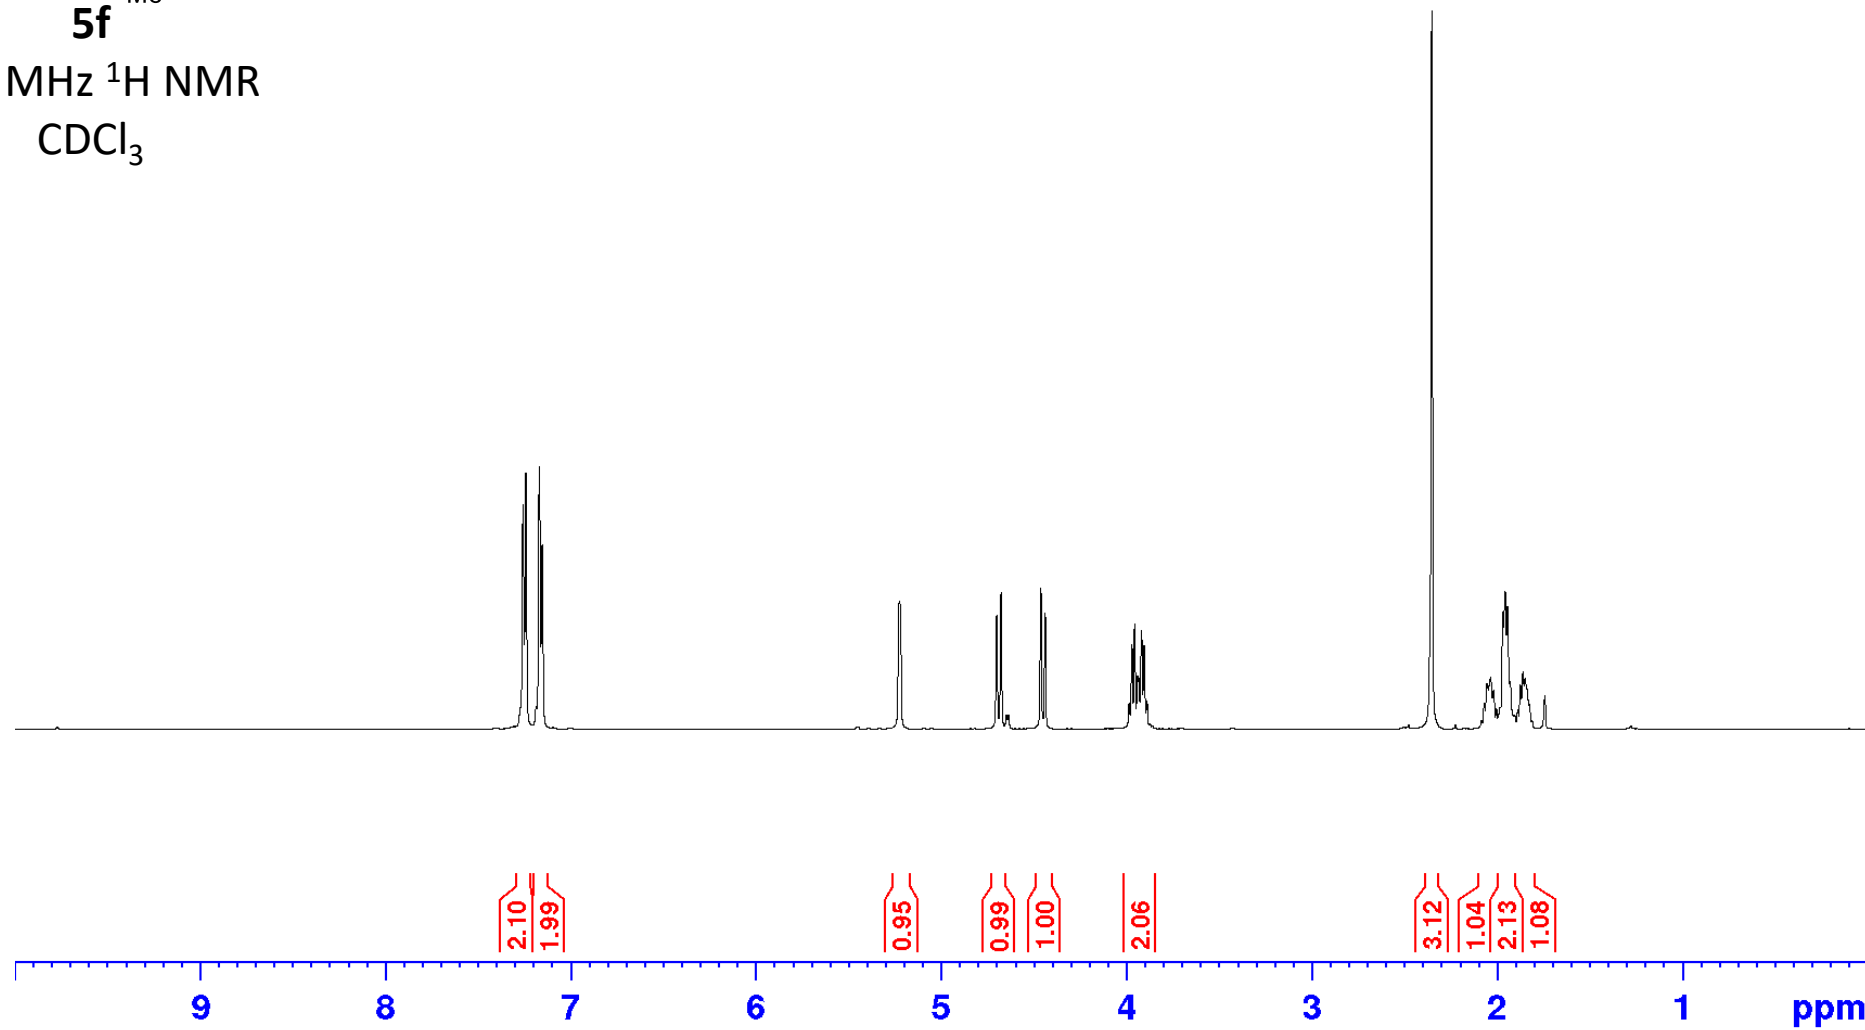

```
Current Data Parameters
NAME      vinn-4-137-10-ialt-2020121
EXPNO    1
PROCNO   1

F2 - Acquisition Parameters
Date_    20201211
Time     5.56 h
INSTRUM  spect
PROBHD   zg30
PULPROG  zg30
TD       65536
SOLVENT  cdcl3
NS       16
DS       2
SWH      10000.000 Hz
FIDRES   0.305176 Hz
AQ       3.2767999 sec
RG       30.85
DW       50.000 usec
DE       6.50 usec
TE       295.1 K
D1       1.00000000 sec
TD0      1
SFO1     500.1330883 MHz
NUC1     1H
P1       10.91 usec
PLW1     25.00000000 W

F2 - Processing parameters
SI       65536
SF       500.1300122 MHz
WDW      EM
SSB      0
LB       0.30 Hz
GB       0
PC       1.00
```

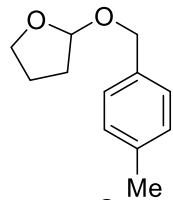

**5f**

125 MHz <sup>13</sup>C NMR  
CDCl<sub>3</sub>

137.27  
135.35  
129.14  
128.10  
103.02  
77.41  
77.16  
76.90  
68.73  
67.06  
32.43  
23.57  
21.26

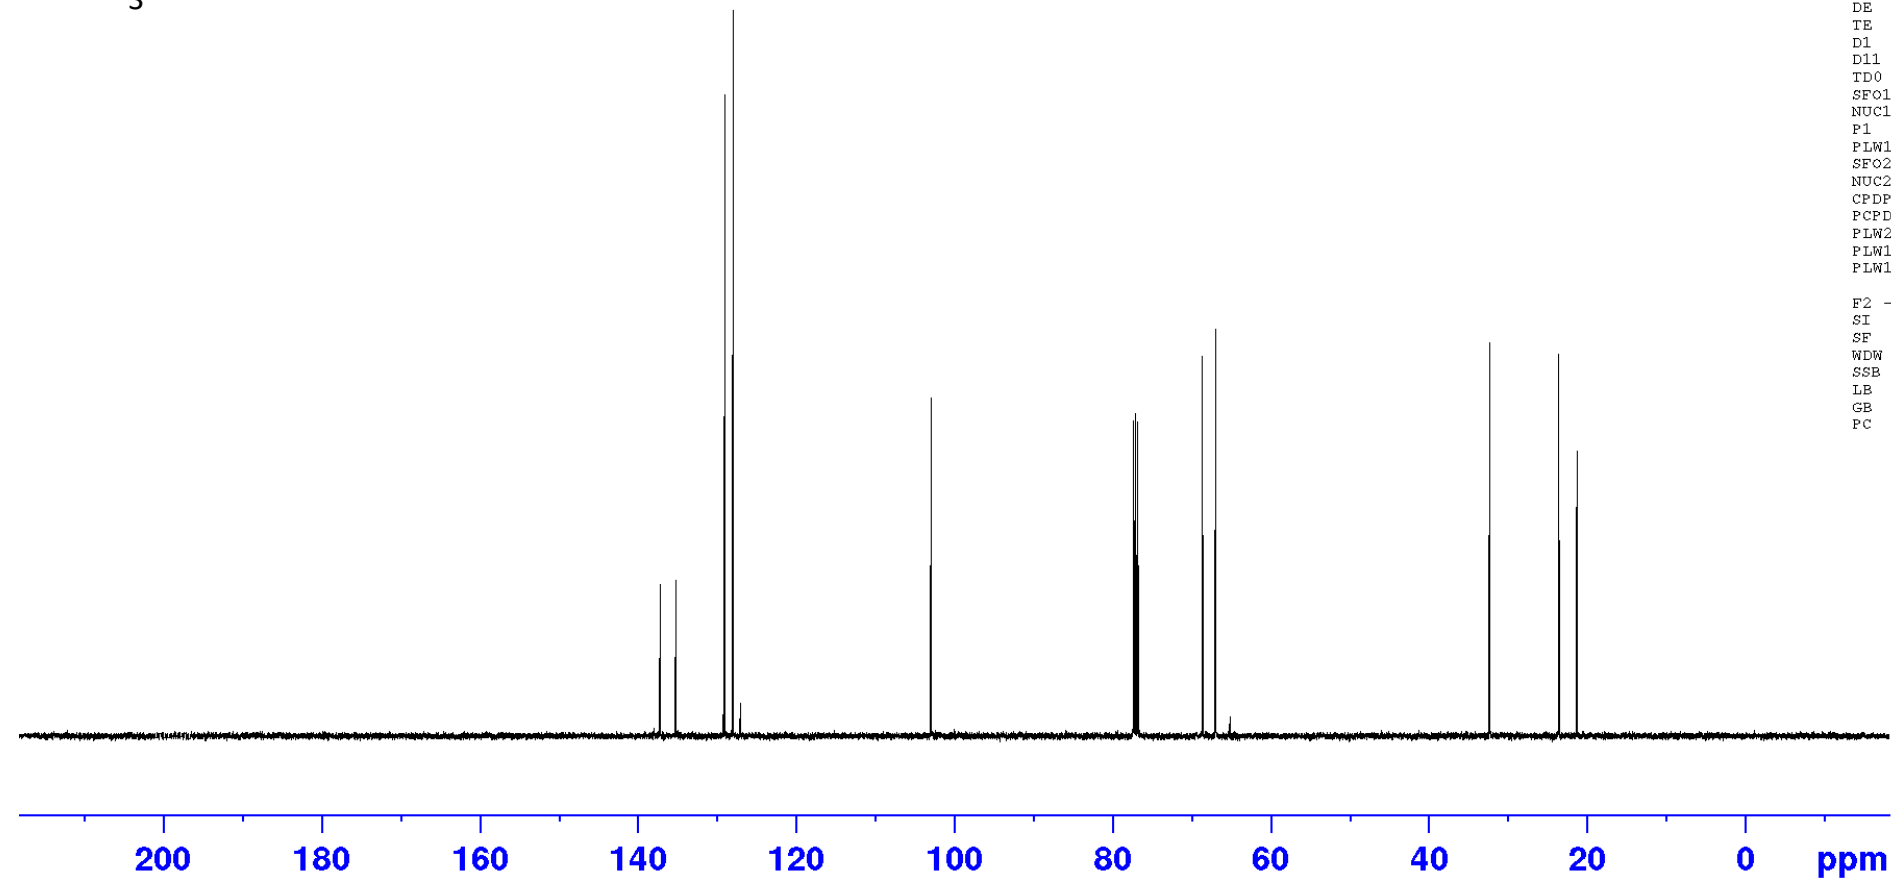

```

Current Data Parameters
NAME      vinn-4-137-10-islt-20201210
EXPNO    2
PROCNO   1

F2 - Acquisition Parameters
Date_    20201211
Time     6.02 h
INSTRUM  spect
PROBHD   Z119470_0283 (
PULPROG  zgpg30
TD       65536
SOLVENT  CDCl3
NS       100
DS       4
SWH      29761.904 Hz
FIDRES   0.908261 Hz
AQ       1.1010048 sec
RG       206.72
DW       16.800 usec
DE       6.50 usec
TE       295.1 K
D1       2.0000000 sec
D11      0.0300000 sec
TD0      1
SFO1     125.7703643 MHz
NUC1     13C
P1       9.75 usec
PLW1     94.0000000 W
SFO2     500.1320005 MHz
NUC2     1H
CPDPRG2  waltz16
PCPD2    80.00 usec
PLW2     25.0000000 W
PLW12    0.46495000 W
PLW13    0.23387000 W

F2 - Processing parameters
SI       32768
SF       125.7577807 MHz
WDW      EM
SSB      0
LB       1.00 Hz
GB       0
PC       1.40

```



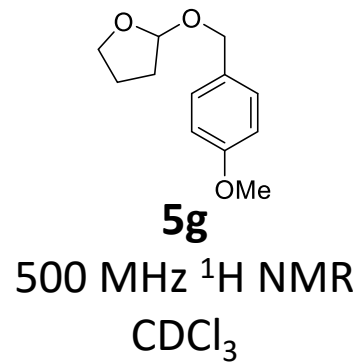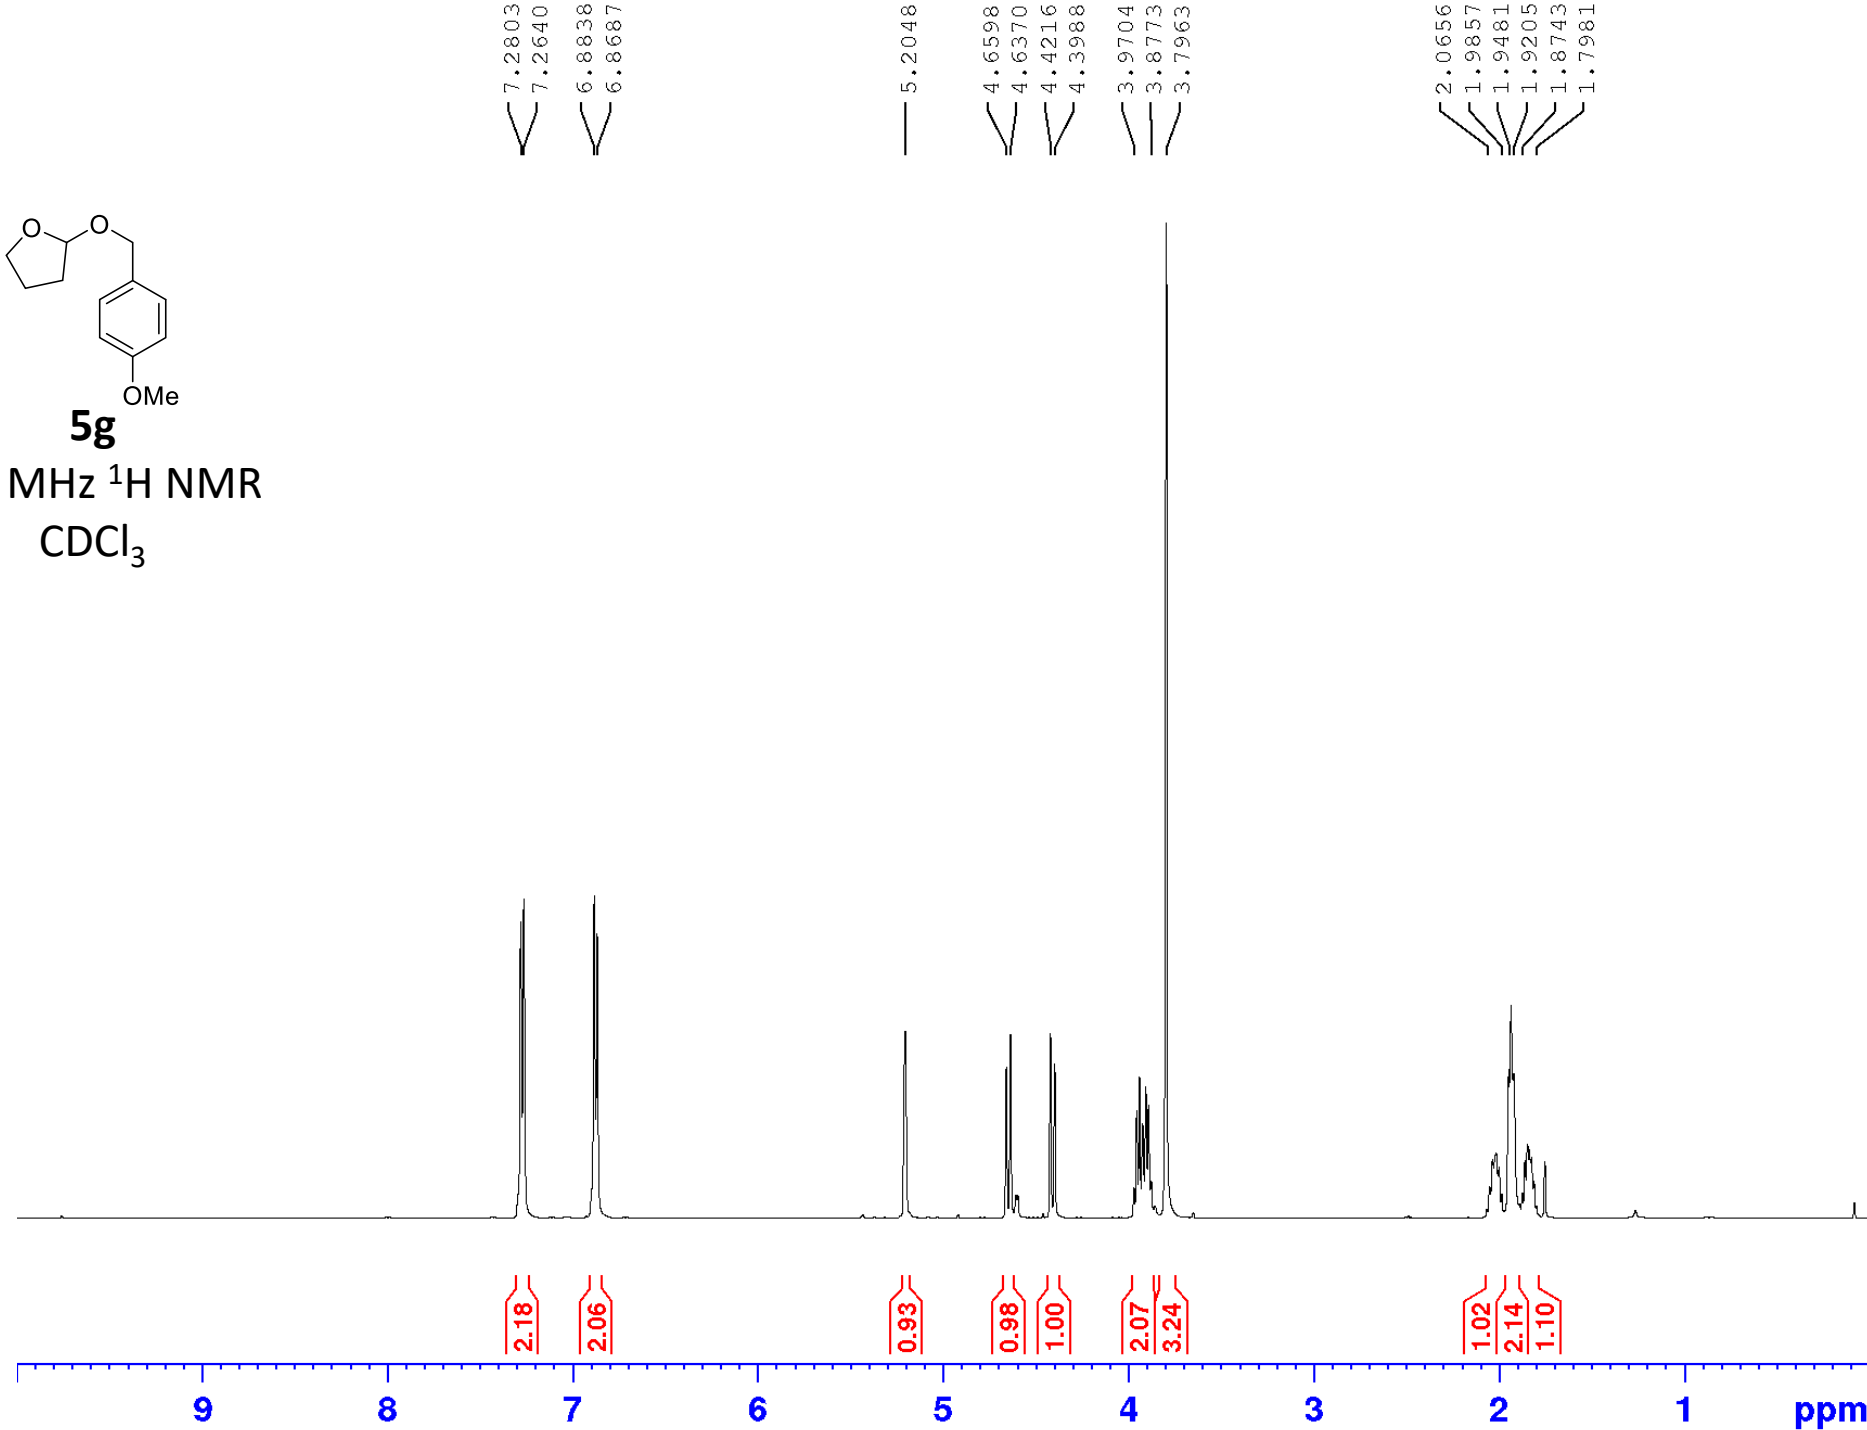

Current Data Parameters  
NAME vinn-4-137-13-ialt-2020121  
EXPNO 1  
PROCNO 1

F2 - Acquisition Parameters  
Date\_ 20201211  
Time 6.24 h  
INSTRUM spect  
PROBHD z119470\_0283 {  
PULPROG zg30  
TD 65536  
SOLVENT cdcl3  
NS 16  
DS 2  
SWH 10000.000 Hz  
FIDRES 0.305176 Hz  
AQ 3.2767999 sec  
RG 30.85  
DW 50.000 usec  
DE 6.50 usec  
TE 295.1 K  
D1 1.00000000 sec  
TD0 1  
SF01 500.1330883 MHz  
NUC1 1H  
P1 10.91 usec  
PLW1 25.00000000 W

F2 - Processing parameters  
SI 65536  
SF 500.1300121 MHz  
WDW EM  
SSB 0  
LB 0.30 Hz  
GB 0  
PC 1.00

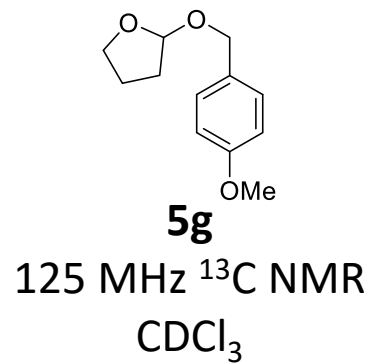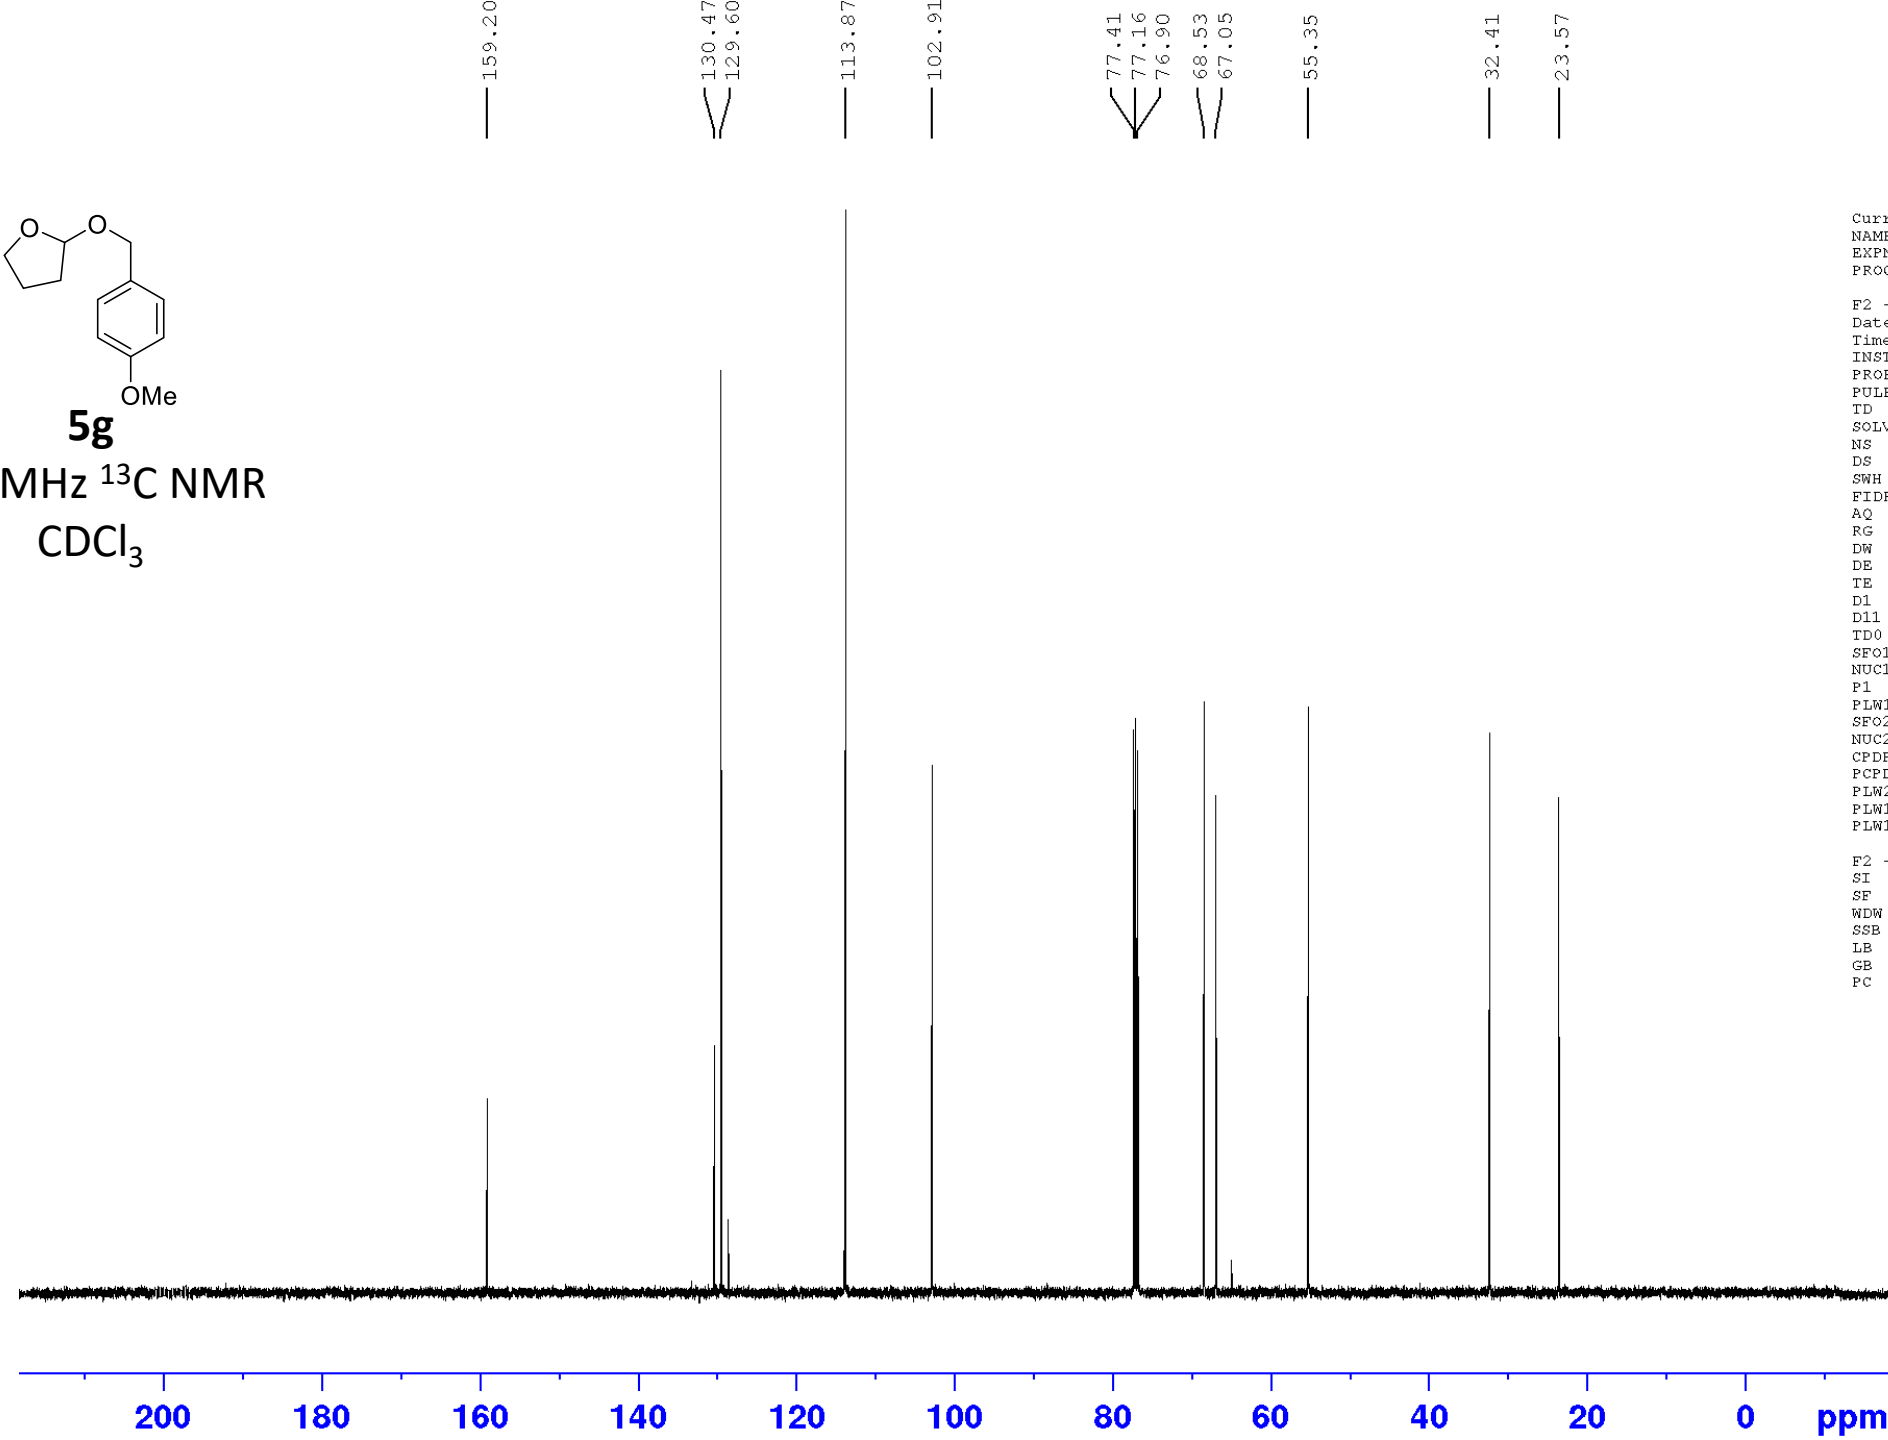

Current Data Parameters  
 NAME vinn-4-137-13-islt-20201210  
 EXPNO 2  
 PROCNO 1

F2 - Acquisition Parameters

Date\_ 20201211  
 Time 6.30 h  
 INSTRUM spect  
 PROBHD Z119470\_0283 (  
 PULPROG zgpg30  
 TD 65536  
 SOLVENT CDCl3  
 NS 100  
 DS 4  
 SWH 29761.904 Hz  
 FIDRES 0.908261 Hz  
 AQ 1.1010048 sec  
 RG 206.72  
 DW 16.800 usec  
 DE 6.50 usec  
 TE 295.2 K  
 D1 2.0000000 sec  
 D11 0.03000000 sec  
 TD0 1  
 SFO1 125.7703643 MHz  
 NUC1 13C  
 P1 9.75 usec  
 PLW1 94.0000000 W  
 SFO2 500.1320005 MHz  
 NUC2 1H  
 CPDPRG[2] waltz16  
 PCPD2 80.00 usec  
 PLW2 25.0000000 W  
 PLW12 0.46495000 W  
 PLW13 0.23387000 W

F2 - Processing parameters

SI 32768  
 SF 125.7577796 MHz  
 WDW EM  
 SSB 0  
 LB 1.00 Hz  
 GB 0  
 PC 1.40

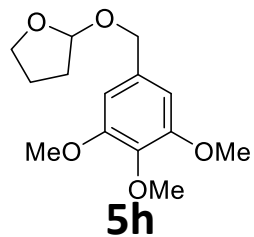

500 MHz <sup>1</sup>H NMR  
CDCl<sub>3</sub>

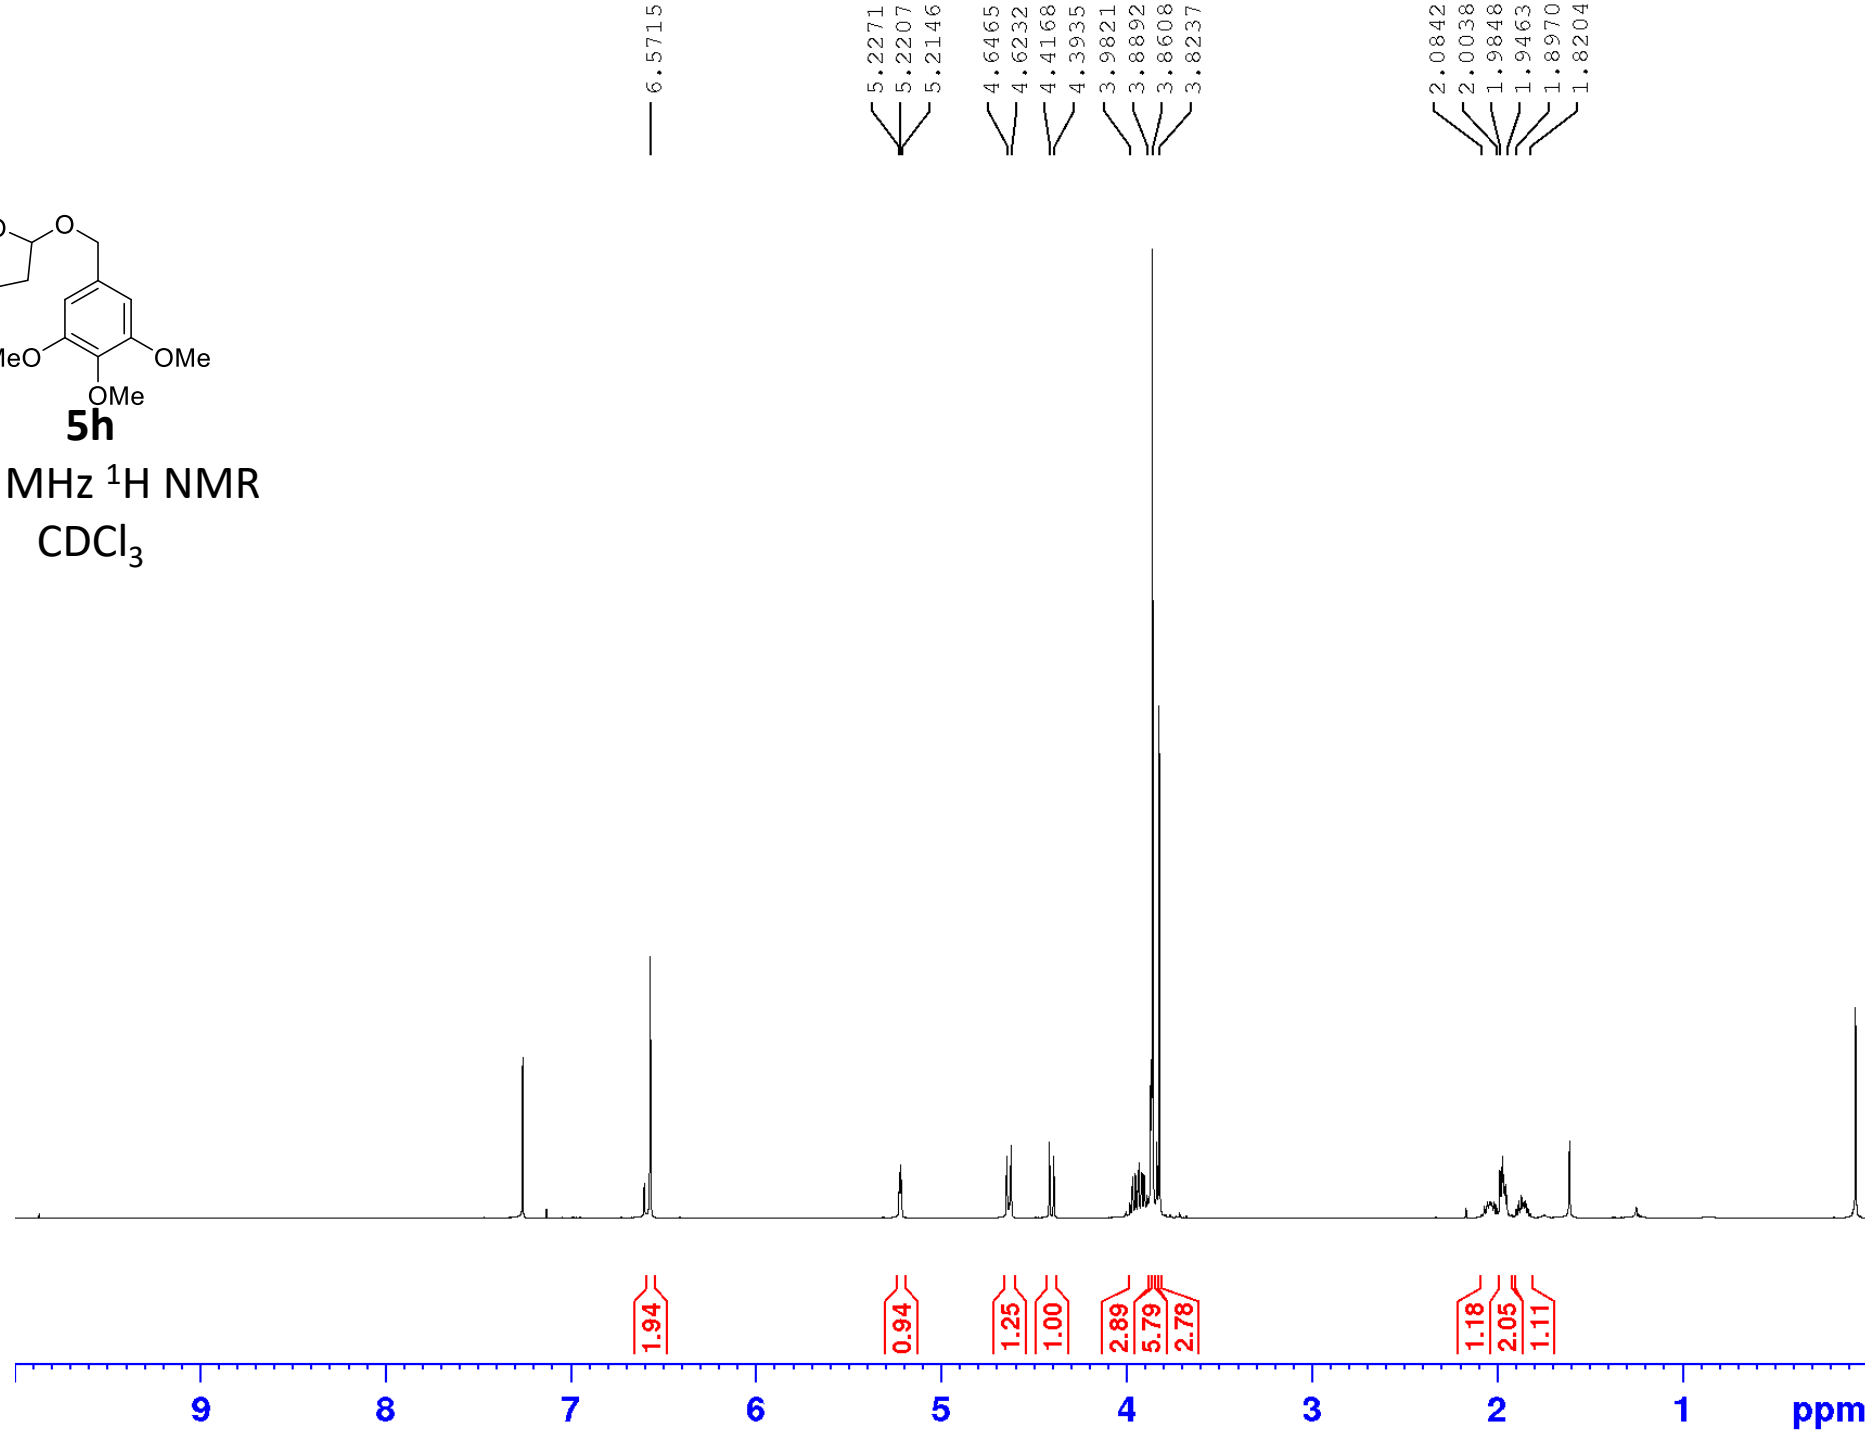

Current Data Parameters  
NAME vinn-4-137-12-islt2-20200120  
EXPNO 1  
PROCNO 1

F2 - Acquisition Parameters  
Date\_ 20210121  
Time 8.57 h  
INSTRUM spect  
PROBHD E119470\_0283 (   
PULPROG zg30  
TD 65536  
SOLVENT CDCl3  
NS 16  
DS 2  
SWH 10000.000 Hz  
FIDRES 0.305176 Hz  
AQ 3.2767999 sec  
RG 93.28  
DW 50.000 usec  
DE 6.50 usec  
TE 295.1 K  
D1 1.00000000 sec  
TD0 1  
SFO1 500.1330883 MHz  
NUC1 1H  
P1 10.91 usec  
PLW1 25.00000000 W

F2 - Processing parameters  
SI 65536  
SF 500.1300126 MHz  
WDW EM  
SSB 0  
LB 0.30 Hz  
GB 0  
PC 1.00

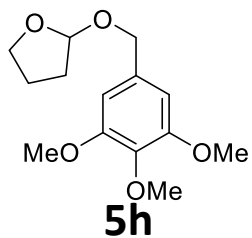

125 MHz <sup>13</sup>C NMR  
CDCl<sub>3</sub>

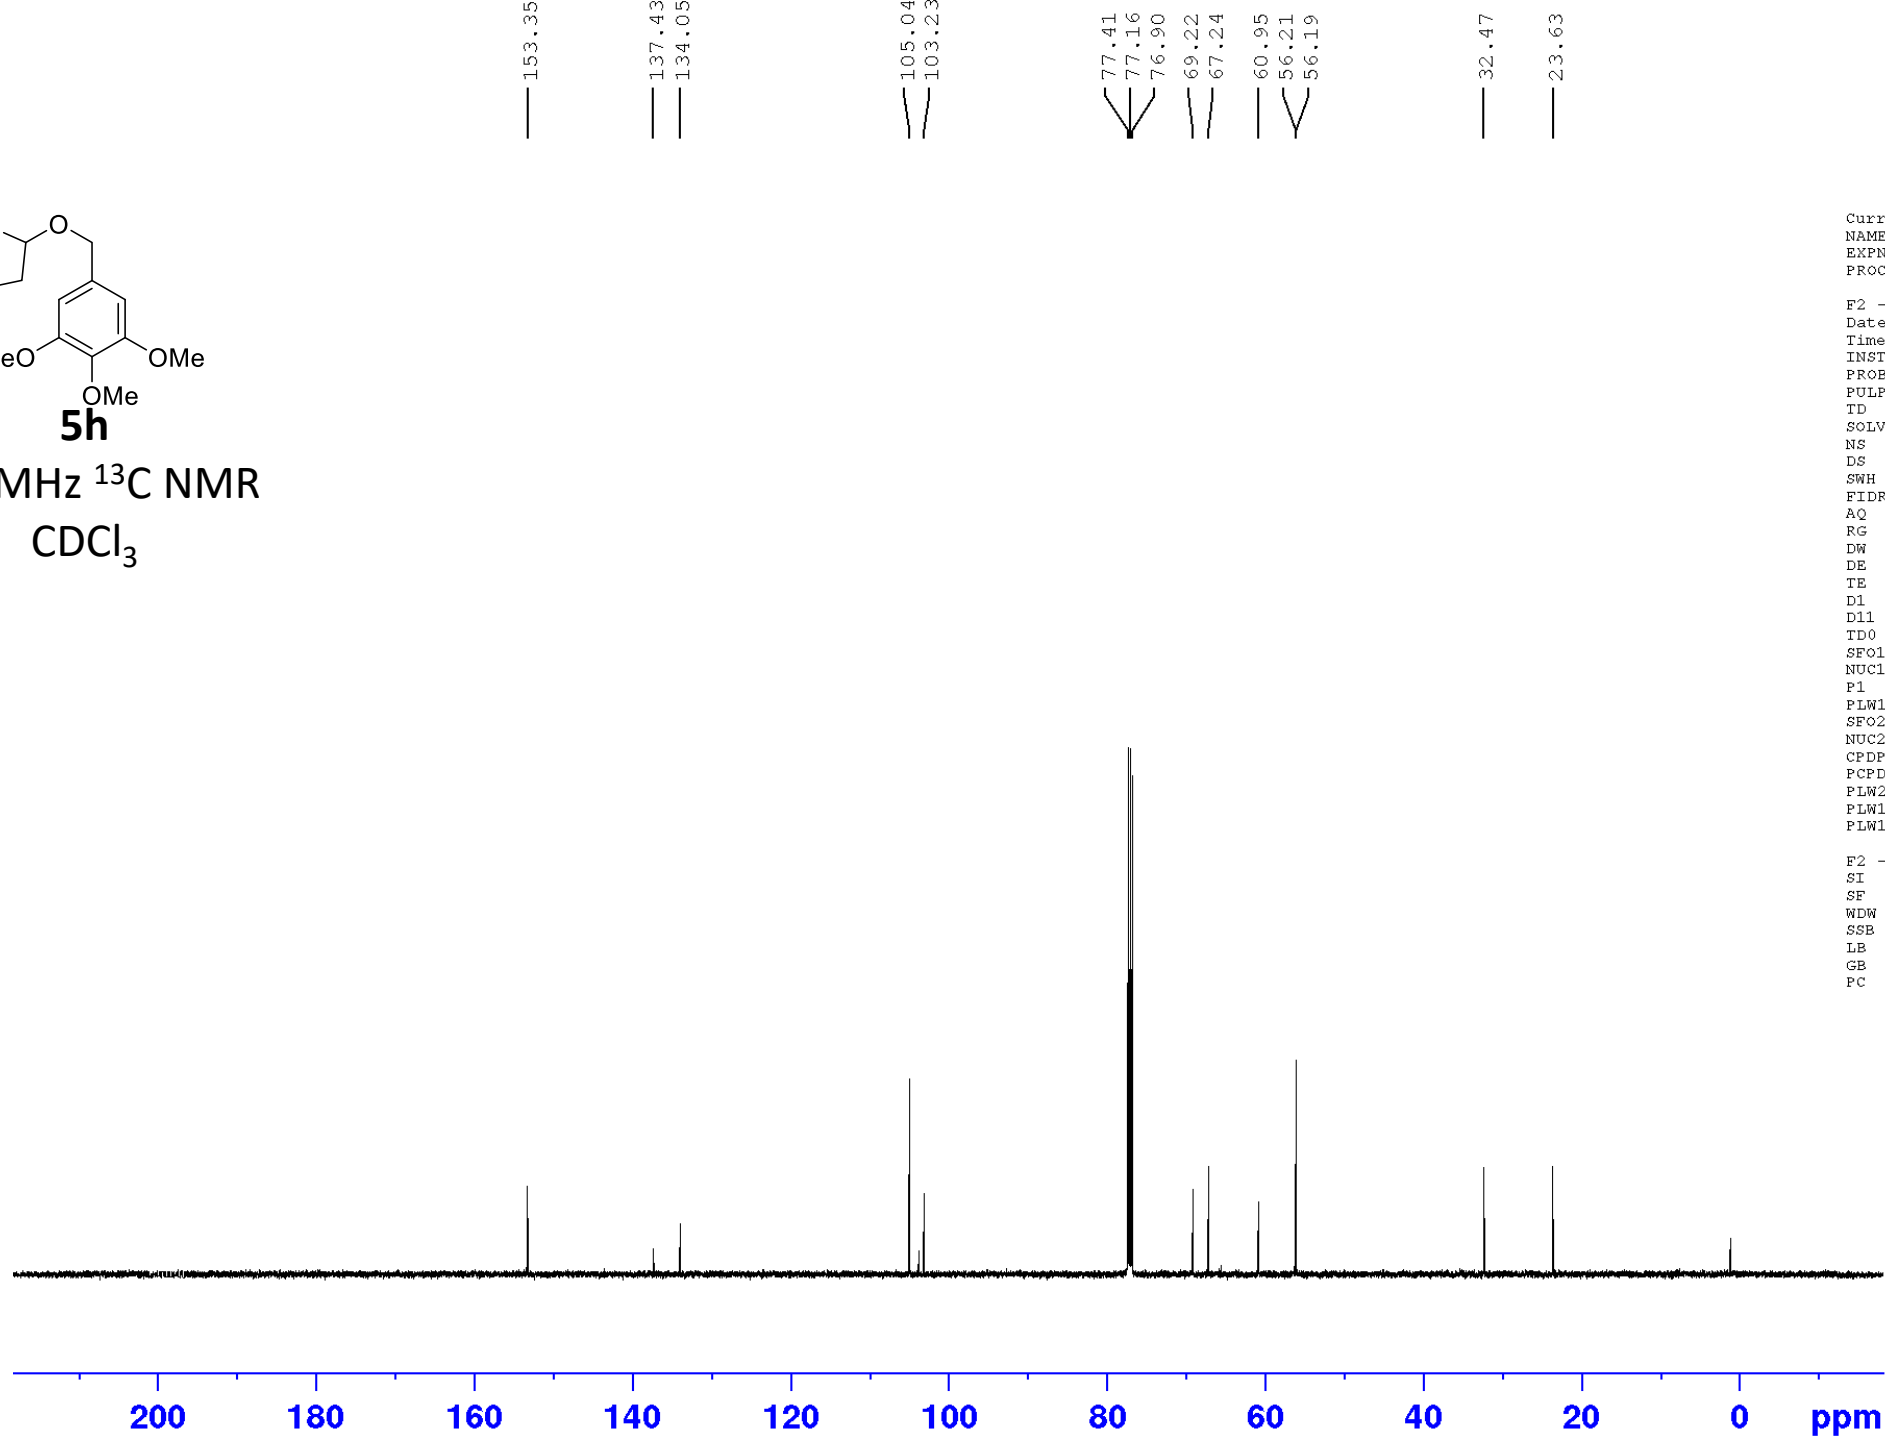

Current Data Parameters  
NAME vinn-4-137-12-islt2-20200120  
EXPNO 2  
PROCNO 1

F2 - Acquisition Parameters  
Date\_ 20210121  
Time 9.10 h  
INSTRUM spect  
PROBHD Z119470\_0283 (   
PULPROG zgpg30  
TD 65536  
SOLVENT CDCl3  
NS 256  
DS 4  
SWH 29761.904 Hz  
FIDRES 0.908261 Hz  
AQ 1.1010048 sec  
RG 206.72  
DW 16.800 usec  
DE 6.50 usec  
TE 295.1 K  
D1 2.0000000 sec  
D11 0.0300000 sec  
TD0 1  
SFO1 125.7703643 MHz  
NUC1 13C  
P1 9.75 usec  
PLW1 94.0000000 W  
SFO2 500.1320005 MHz  
NUC2 1H  
CPDPRG[2] waltz16  
PCPD2 80.00 usec  
PLW2 25.0000000 W  
PLW12 0.46495000 W  
PLW13 0.23387000 W

F2 - Processing parameters  
SI 32768  
SF 125.7577741 MHz  
WDW EM  
SSB 0  
LB 1.00 Hz  
GB 0  
PC 1.40

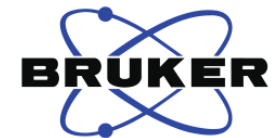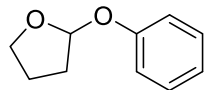

**5i**  
500 MHz <sup>1</sup>H NMR  
CDCl<sub>3</sub>

7.2904  
7.2752  
7.2585  
7.0368  
7.0210  
6.9871  
6.9724  
6.9577  
5.8153  
5.8060  
4.0737  
4.0309  
3.9699  
3.9267  
2.2072  
2.0968  
1.9931  
1.8984

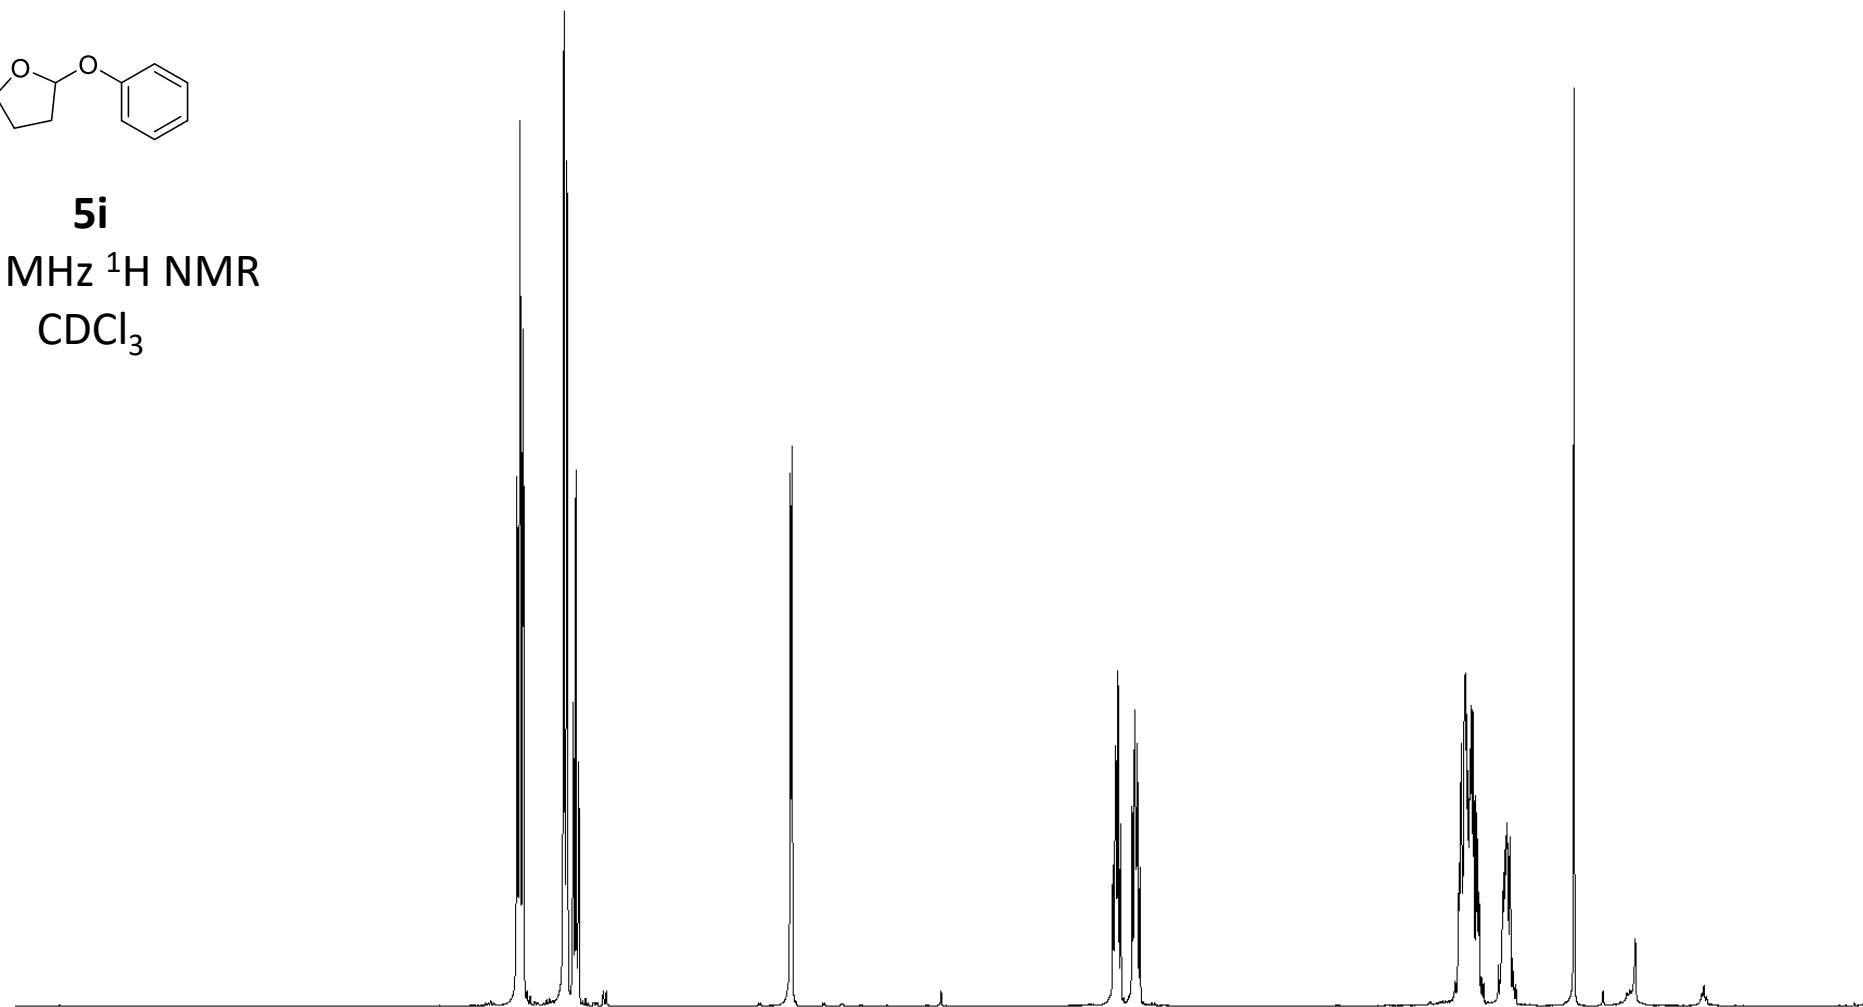

1.98  
1.97  
0.95  
1.00  
1.02  
1.02  
3.09  
1.05

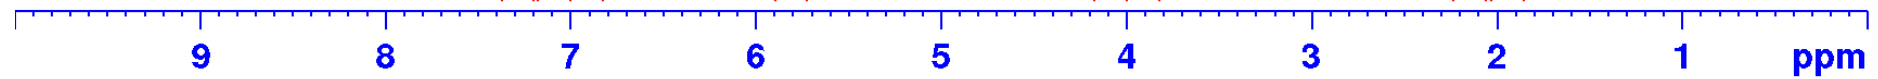

Current Data Parameters  
NAME vinn-4-193-islt-20230105  
EXPNO 1  
PROCNO 1  
F2 - Acquisition Parameters  
Date\_ 20230105  
Time 16.35 h  
INSTRUM spect  
PROBHD Z119470\_0283 (1  
PULPROG zg30  
TD 65536  
SOLVENT CDCl3  
NS 16  
DS 2  
SWH 10000.000 Hz  
FIDRES 0.305176 Hz  
AQ 3.2767999 sec  
RG 117.01  
DW 50.000 usec  
DE 6.50 usec  
TE 295.2 K  
D1 1.00000000 sec  
TDO 1  
SFO1 500.1330883 MHz  
NUC1 1H  
P1 10.91 usec  
PLW1 25.00000000 W  
F2 - Processing parameters  
SI 65536  
SF 500.1300150 MHz  
WDW EM  
SSB 0  
LB 0.30 Hz  
GB 0  
PC 1.00

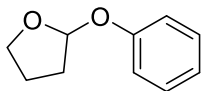

5i

125 MHz  $^{13}\text{C}$  NMR  
 $\text{CDCl}_3$

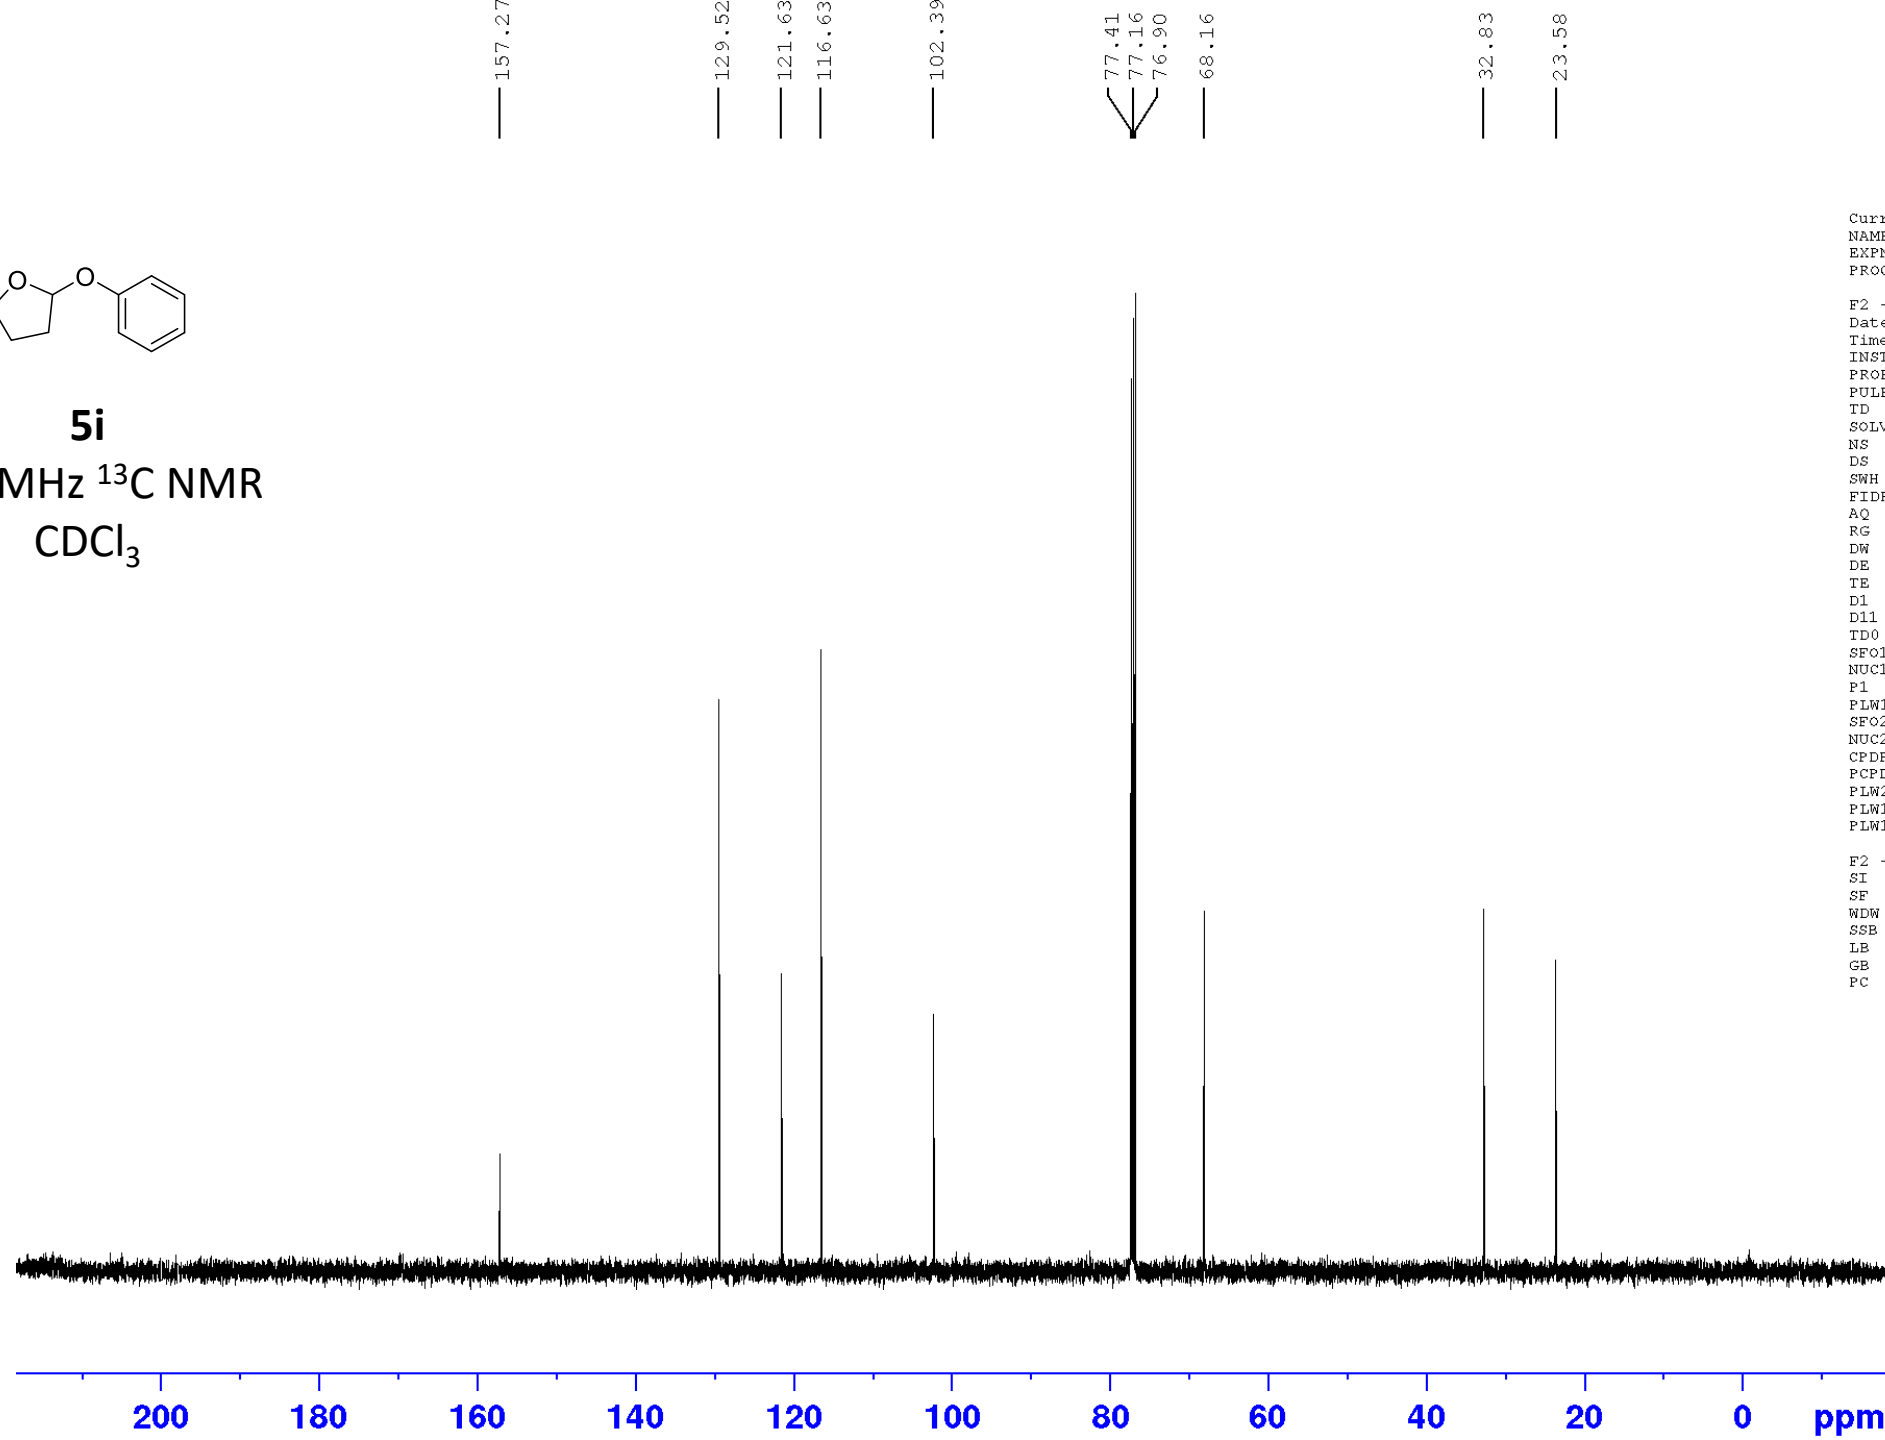

Current Data Parameters  
NAME vinn-4-193-isl-20230105  
EXPNO 2  
PROCNO 1

F2 - Acquisition Parameters

Date\_ 20230105  
Time 16.39 h  
INSTRUM spect  
PROBHD Z119470\_0283 (  
PULPROG zgpg30  
TD 65536  
SOLVENT CDCl3  
NS 50  
DS 4  
SWH 29761.904 Hz  
FIDRES 0.908261 Hz  
AQ 1.1010048 sec  
RG 206.72  
DW 16.800 usec  
DE 6.50 usec  
TE 295.1 K  
D1 2.0000000 sec  
D11 0.03000000 sec  
TD0 1  
SFO1 125.7703643 MHz  
NUC1 13C  
P1 9.75 usec  
PLW1 94.0000000 W  
SFO2 500.1320005 MHz  
NUC2 1H  
CPDPRG[2] waltz16  
PCPD2 80.00 usec  
PLW2 25.0000000 W  
PLW12 0.46495000 W  
PLW13 0.23387000 W

F2 - Processing parameters

SI 32768  
SF 125.7577746 MHz  
WDW EM  
SSB 0  
LB 1.00 Hz  
GB 0  
PC 1.40

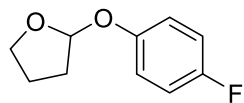

**5j**

500 MHz  $^1\text{H}$  NMR  
 $\text{CDCl}_3$

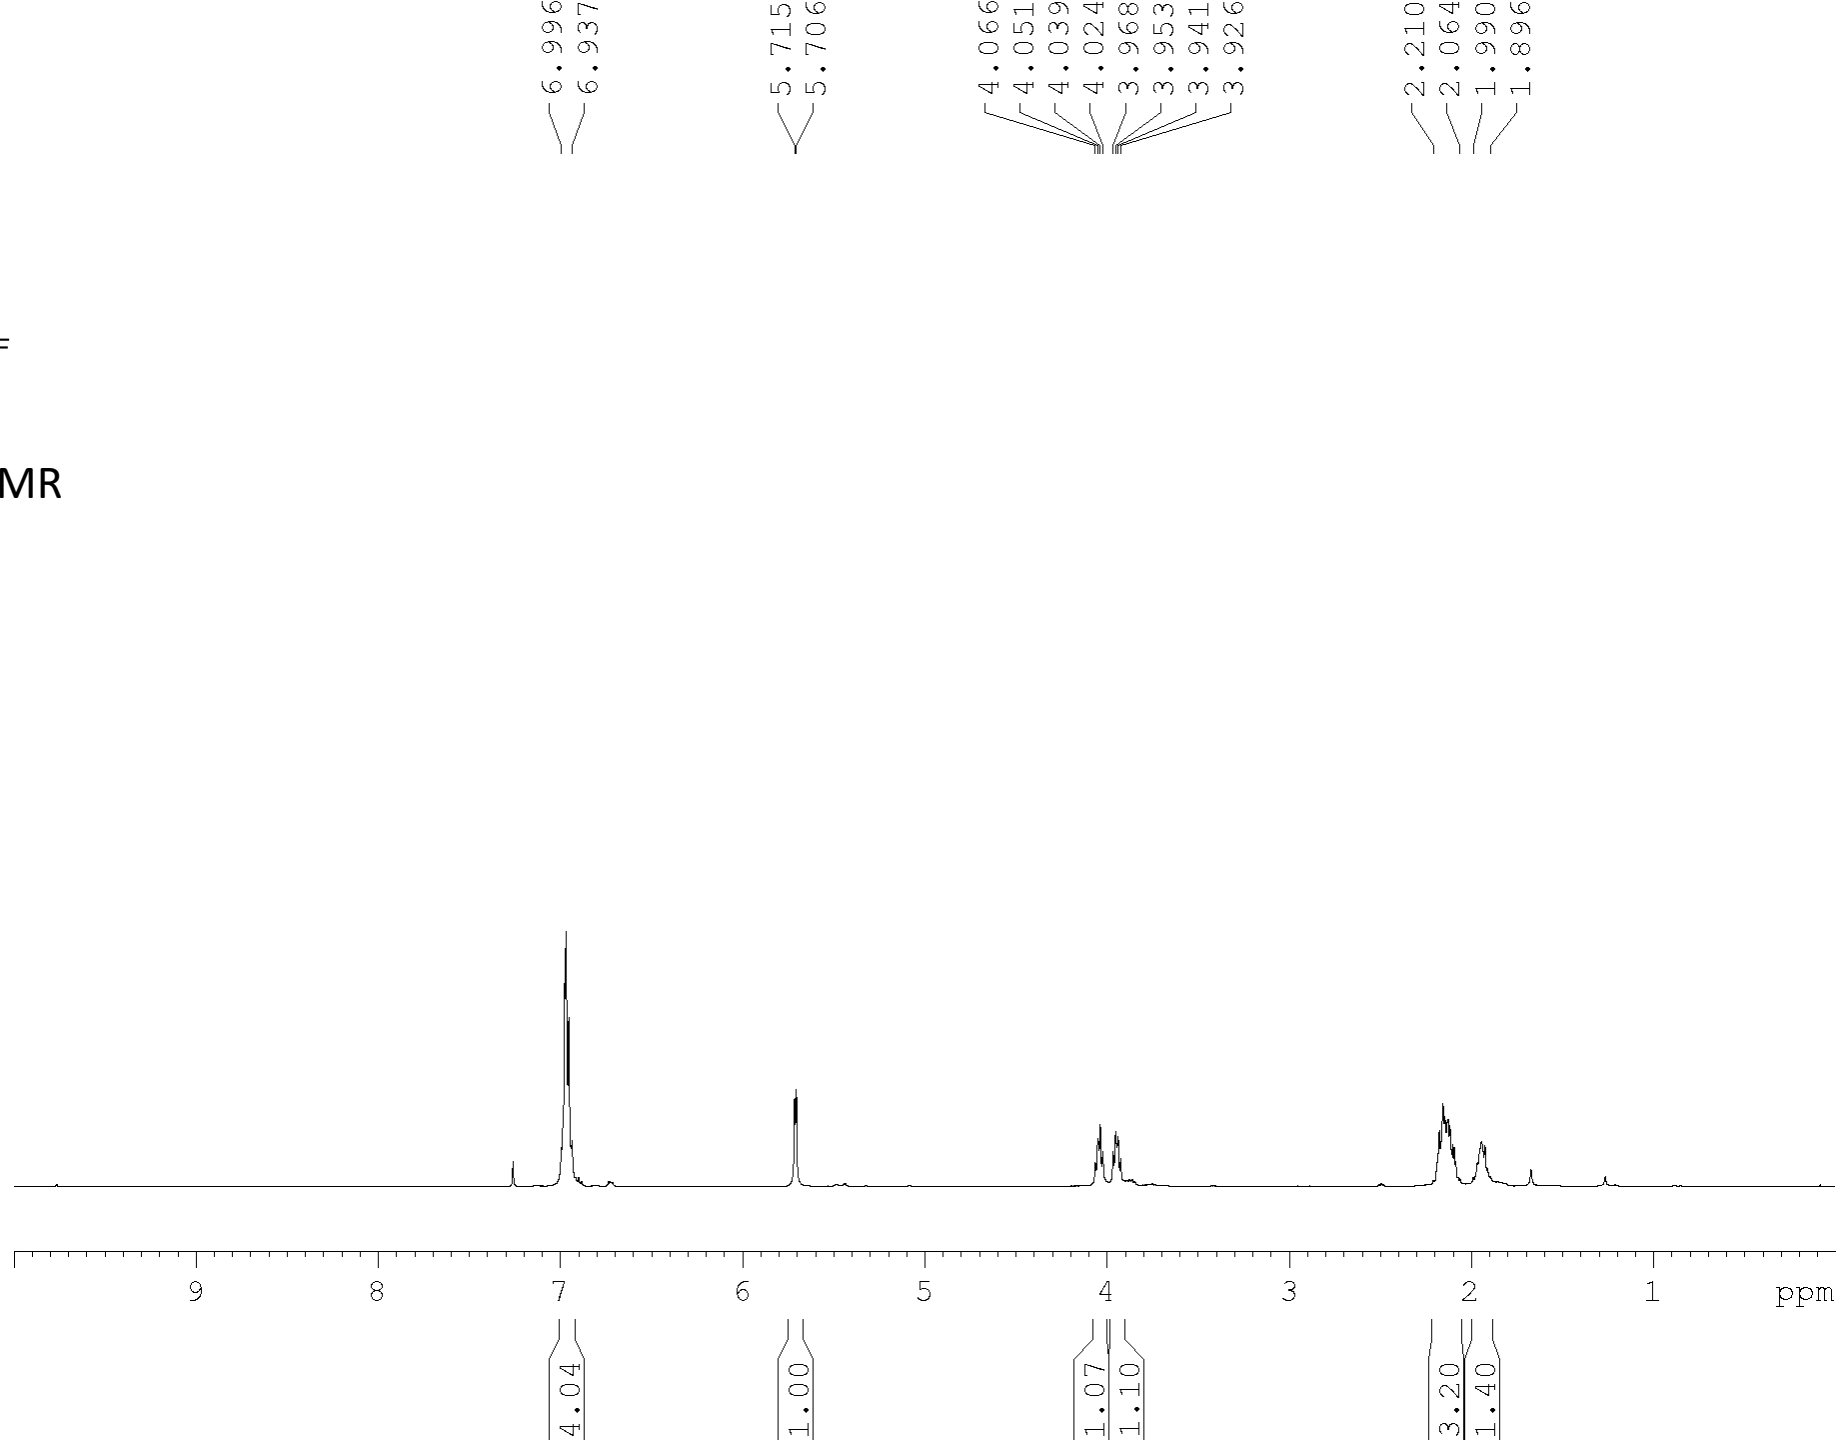

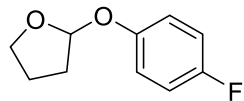

**5j**

125 MHz  $^{13}\text{C}$  NMR  
 $\text{CDCl}_3$

158.901  
157.001  
153.389  
153.370

118.023  
117.960  
115.935  
115.754

103.123

77.416  
77.161  
76.907  
68.136

32.820

23.528

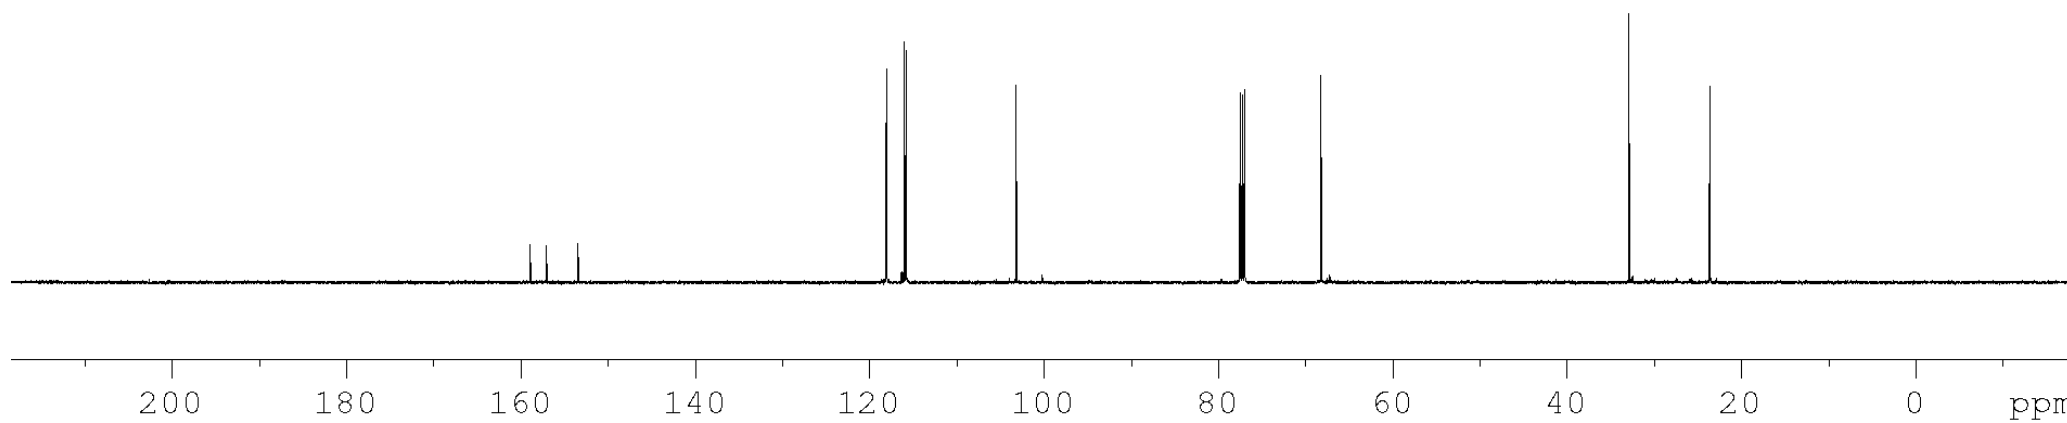



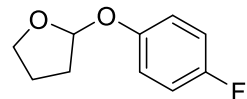

**5j**

470 MHz <sup>1</sup>H NMR  
CDCl<sub>3</sub>

-122.94  
-122.95  
-122.96  
-122.97  
-122.98  
-122.99

Current Data Parameters  
NAME vinn-4-147-3-islt-20200120  
EXPNO 3  
PROCNO 1

F2 - Acquisition Parameters  
Date\_ 20210121  
Time 18.34 h  
INSTRUM spect  
PROBHD z119470\_0283 (  
PULPROG zgflgn  
TD 131072  
SOLVENT CDCl3  
NS 16  
DS 4  
SWH 113636.367 Hz  
FIDRES 1.733953 Hz  
AQ 0.5767168 sec  
RG 206.72  
DW 4.400 usec  
DE 6.50 usec  
TE 295.1 K  
D1 1.00000000 sec  
TD0 1  
SFO1 470.5453180 MHz  
NUC1 19F  
P1 15.00 usec  
PLW1 47.23500061 W

F2 - Processing parameters  
SI 65536  
SF 470.5923772 MHz  
WDW EM  
SSB 0  
LB 0.30 Hz  
GB 0  
PC 1.00

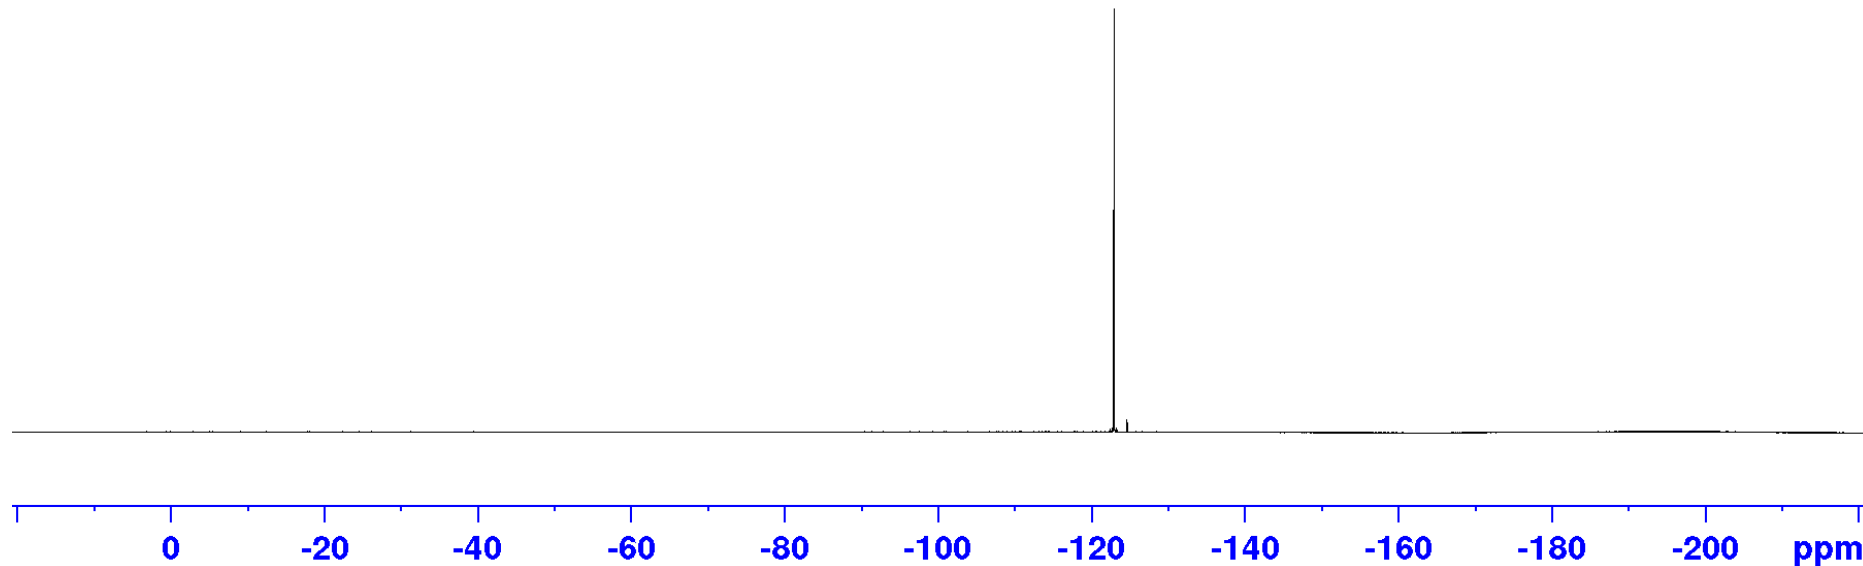

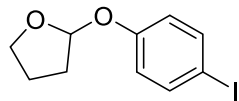

**5k**

500 MHz  $^1\text{H}$  NMR  
 $\text{CDCl}_3$

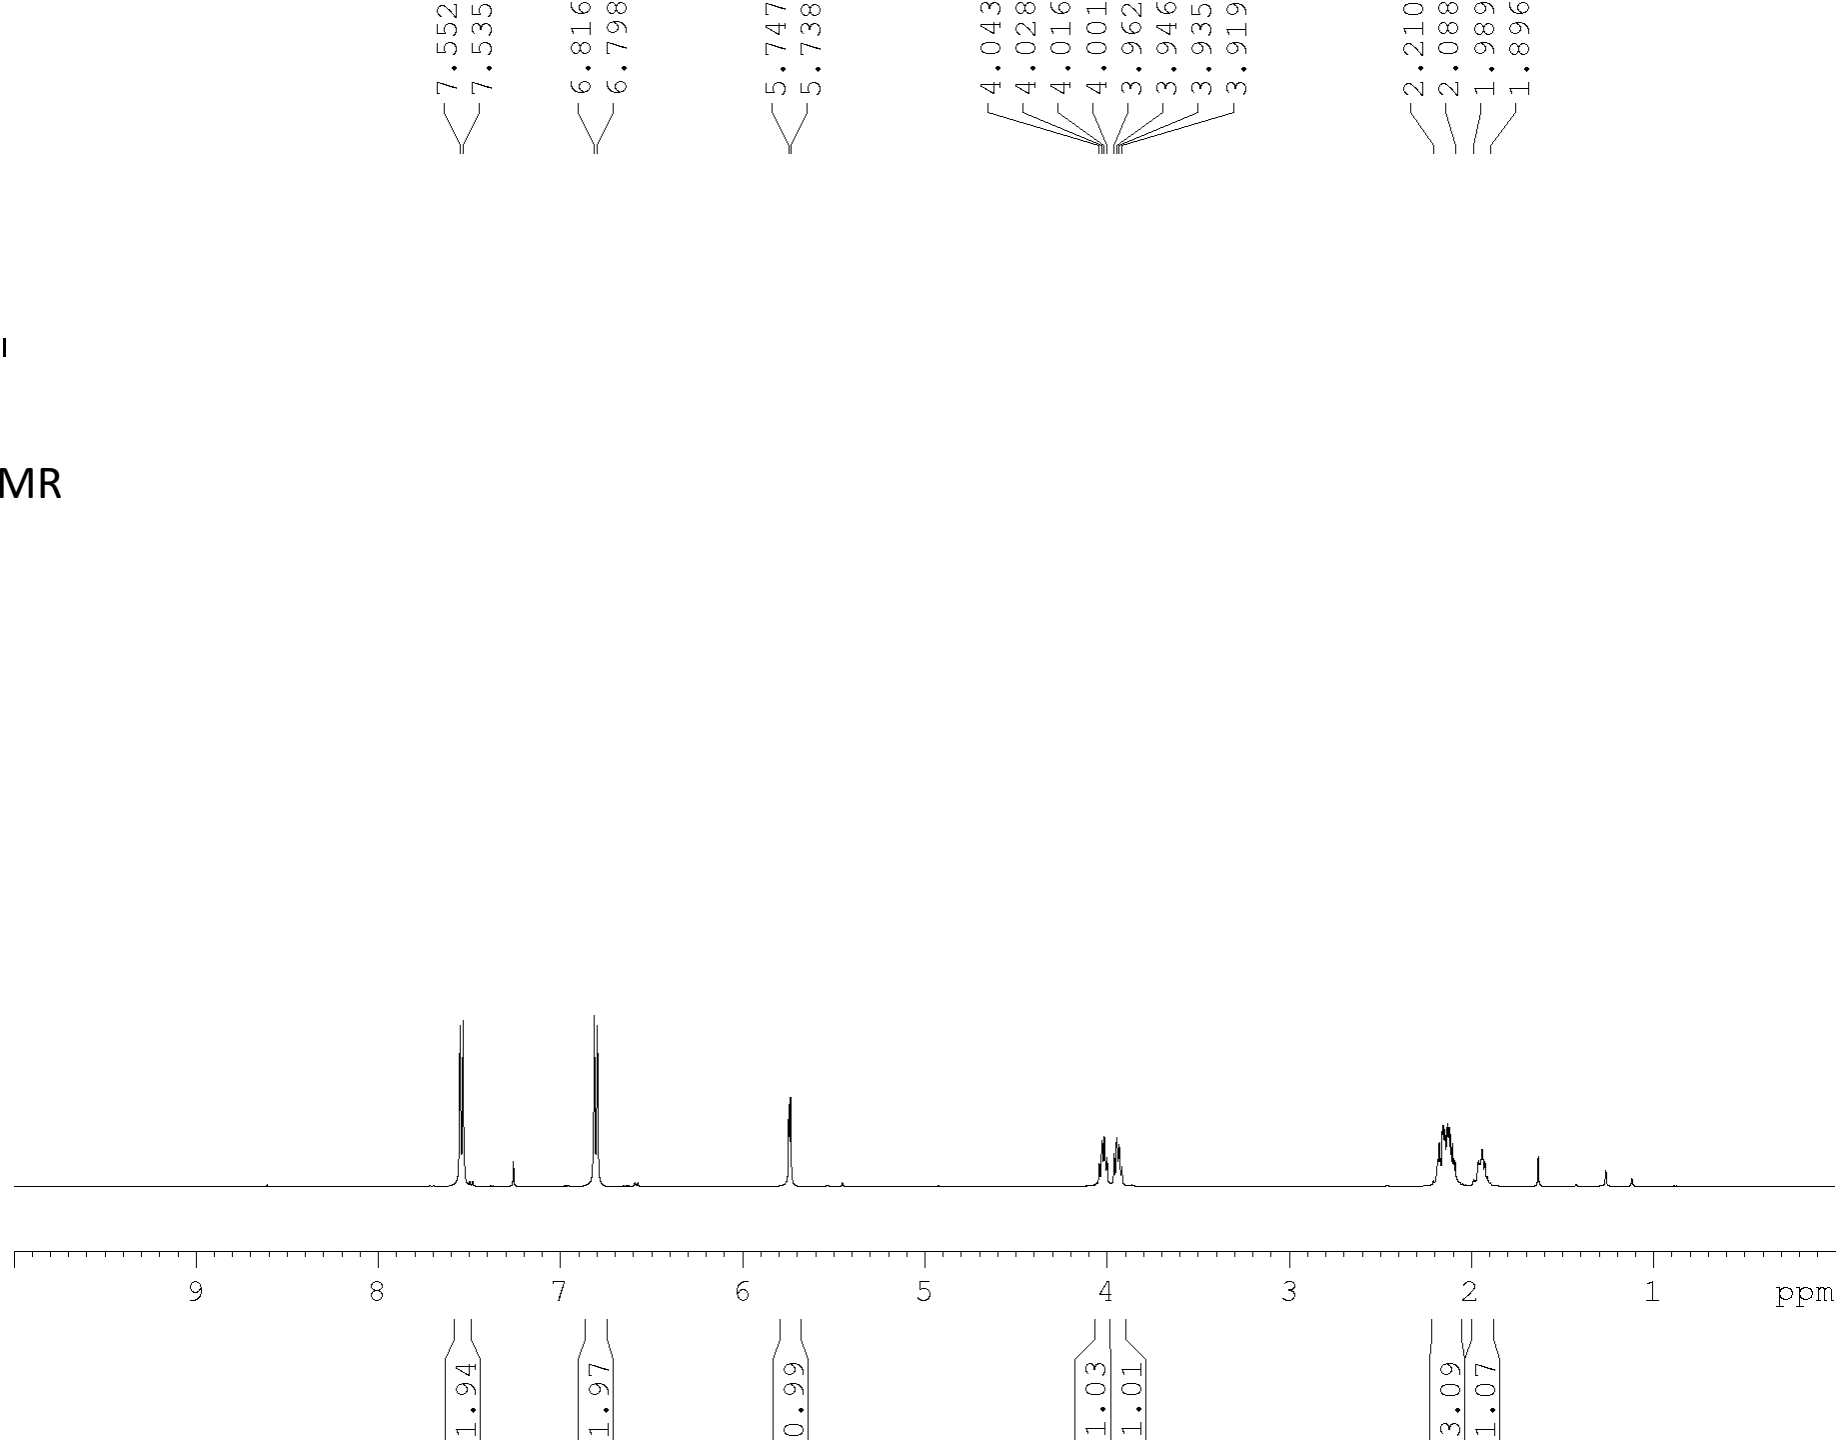



**5k**

125 MHz  $^{13}\text{C}$  NMR  
 $\text{CDCl}_3$

— 157.143  
— 138.262  
— 118.993  
— 102.433  
— 83.997  
— 77.397  
— 77.143  
— 76.890  
— 68.264  
— 32.773  
— 23.448

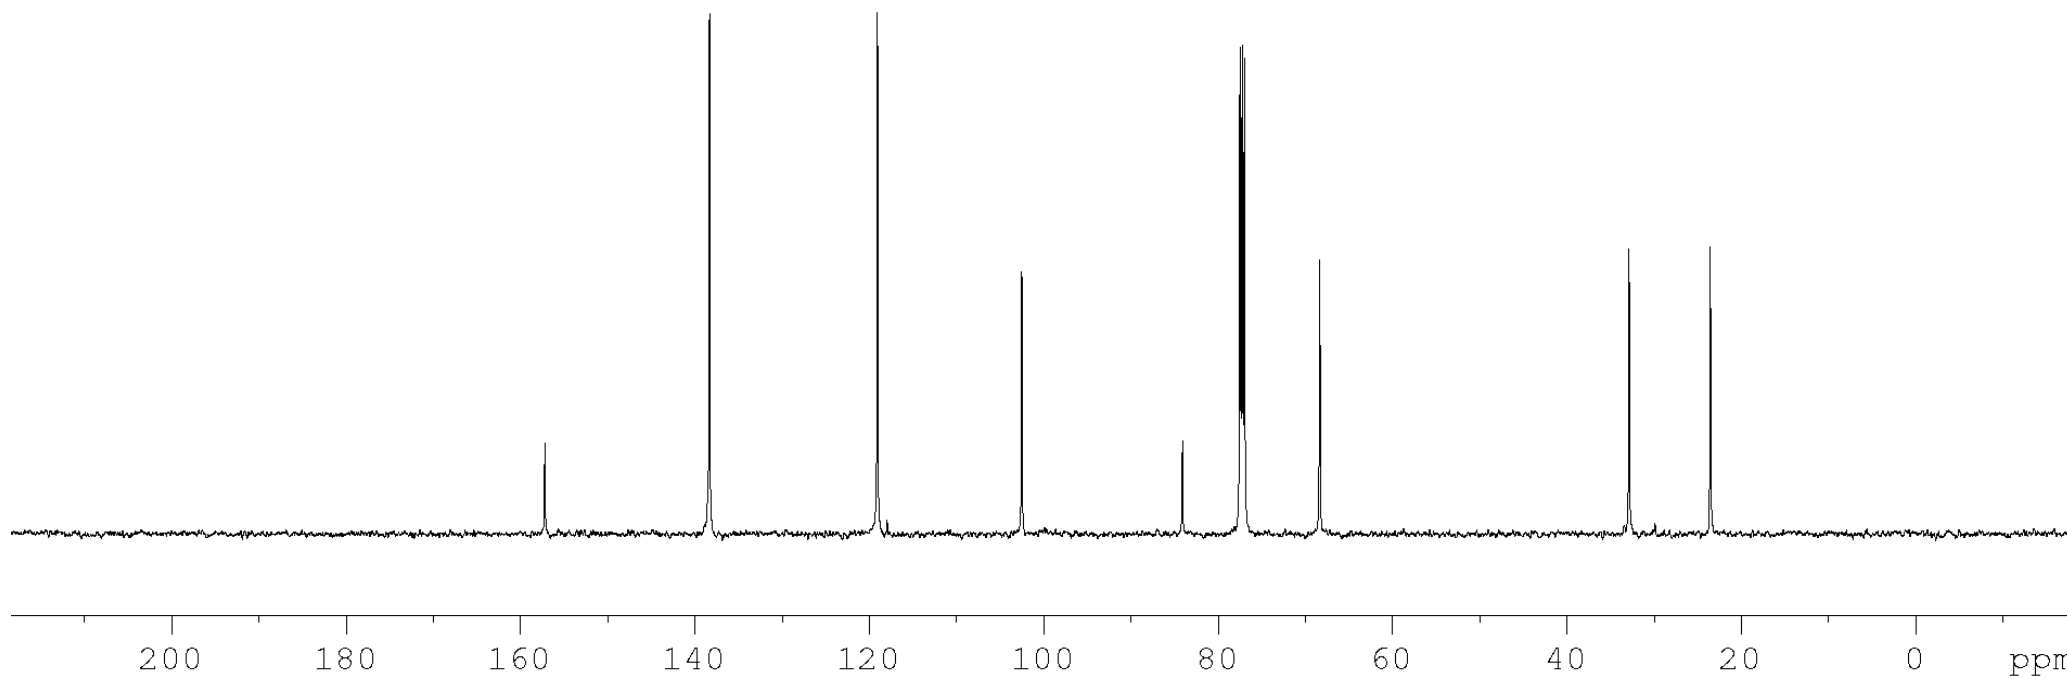

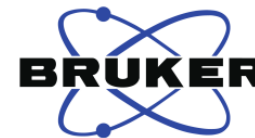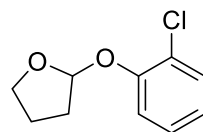

5l

500 MHz <sup>1</sup>H NMR  
CDCl<sub>3</sub>

7.3586  
7.3558  
7.3429  
7.3399  
7.2348  
7.1766  
6.9467  
6.9131  
5.8127  
5.8038  
4.1245  
4.1085  
4.0970  
4.0808  
3.9889  
3.9735  
3.9603  
3.9444  
2.3394  
2.2909  
2.2667  
2.1008  
2.0027  
1.9281

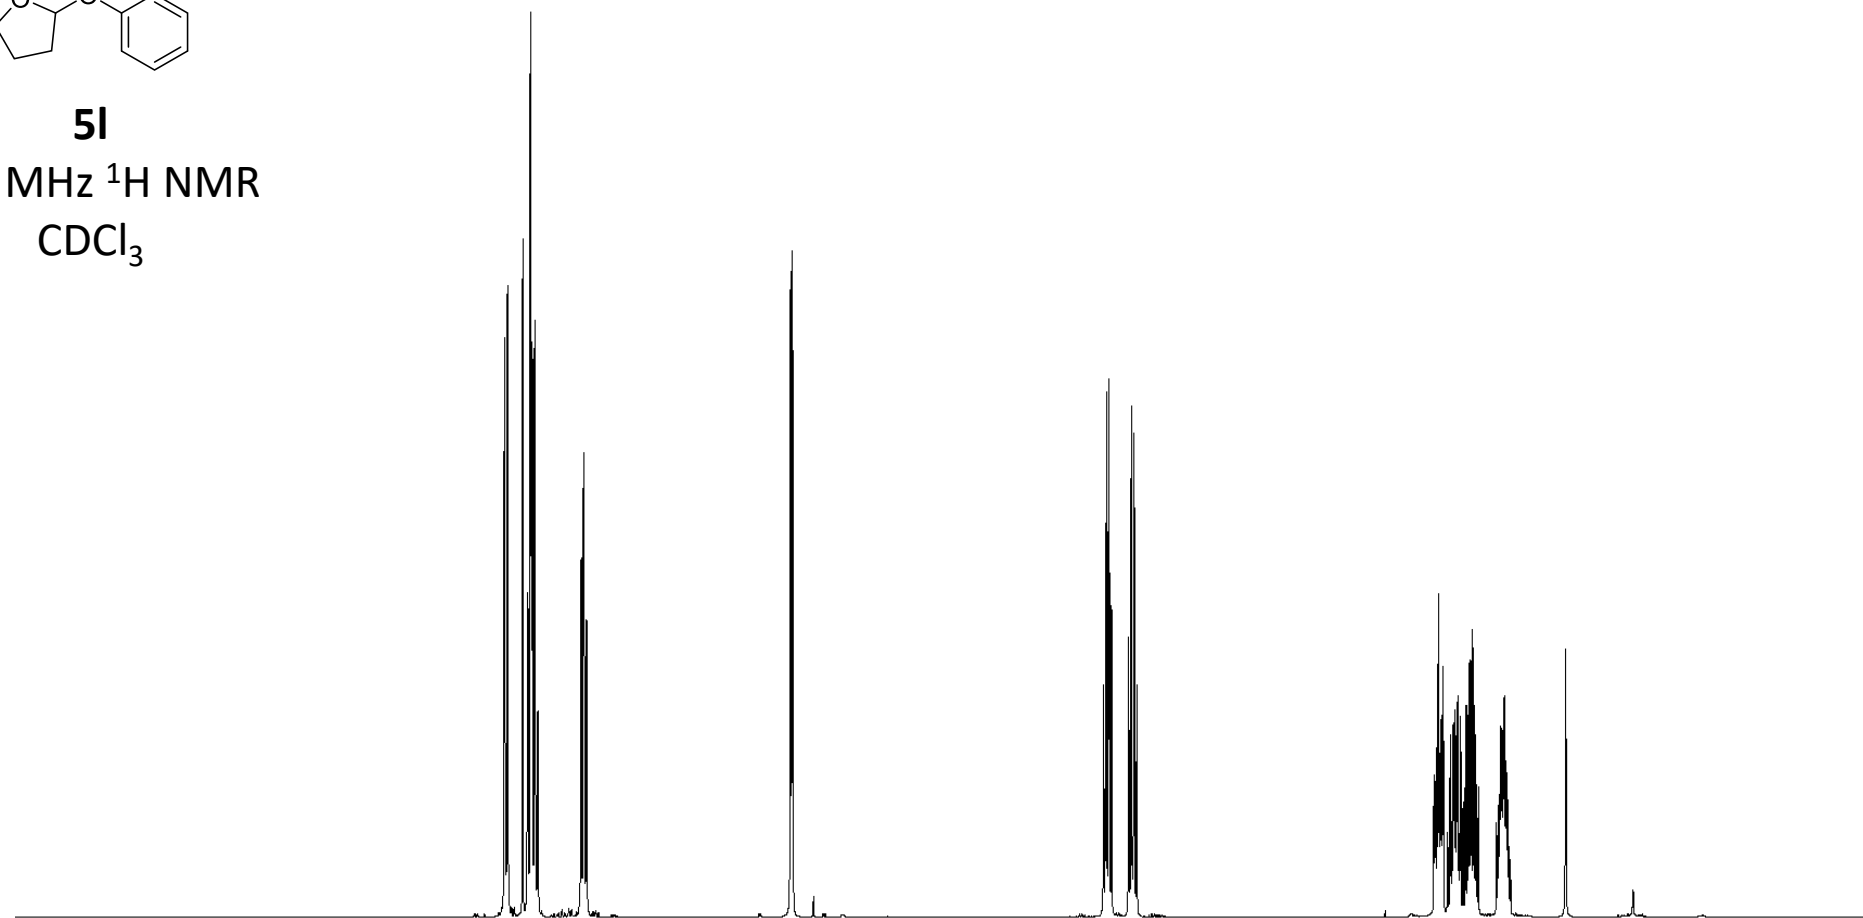

0.98  
2.01  
0.98  
1.00  
1.03  
1.04  
1.03  
2.11  
1.04

9 8 7 6 5 4 3 2 1 ppm

Current Data Parameters  
NAME vinn-4-183-3-isl2-2023032  
EXPNO 1  
PROCNO 1

F2 - Acquisition Parameters  
Date\_ 20230321  
Time 15.51 h  
INSTRUM spect  
PROBHD z149001\_0010 {  
PULPROG zg30  
TD 65536  
SOLVENT cdcl3  
NS 16  
DS 2  
SWH 10000.000 Hz  
FIDRES 0.305176 Hz  
AQ 3.2767999 sec  
RG 30.85  
DW 50.000 usec  
DE 10.00 usec  
TE 296.1 K  
D1 1.00000000 sec  
TDO 1  
SFO1 500.1330883 MHz  
NUC1 1H  
P1 11.25 usec  
PLW1 17.35199928 w

F2 - Processing parameters  
SI 65536  
SF 500.1300124 MHz  
WDW EM  
SSB 0  
LB 0.30 Hz  
GB 0  
PC 1.00

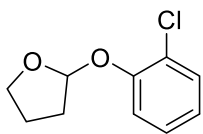

5I

125 MHz <sup>13</sup>C NMR  
CDCl<sub>3</sub>

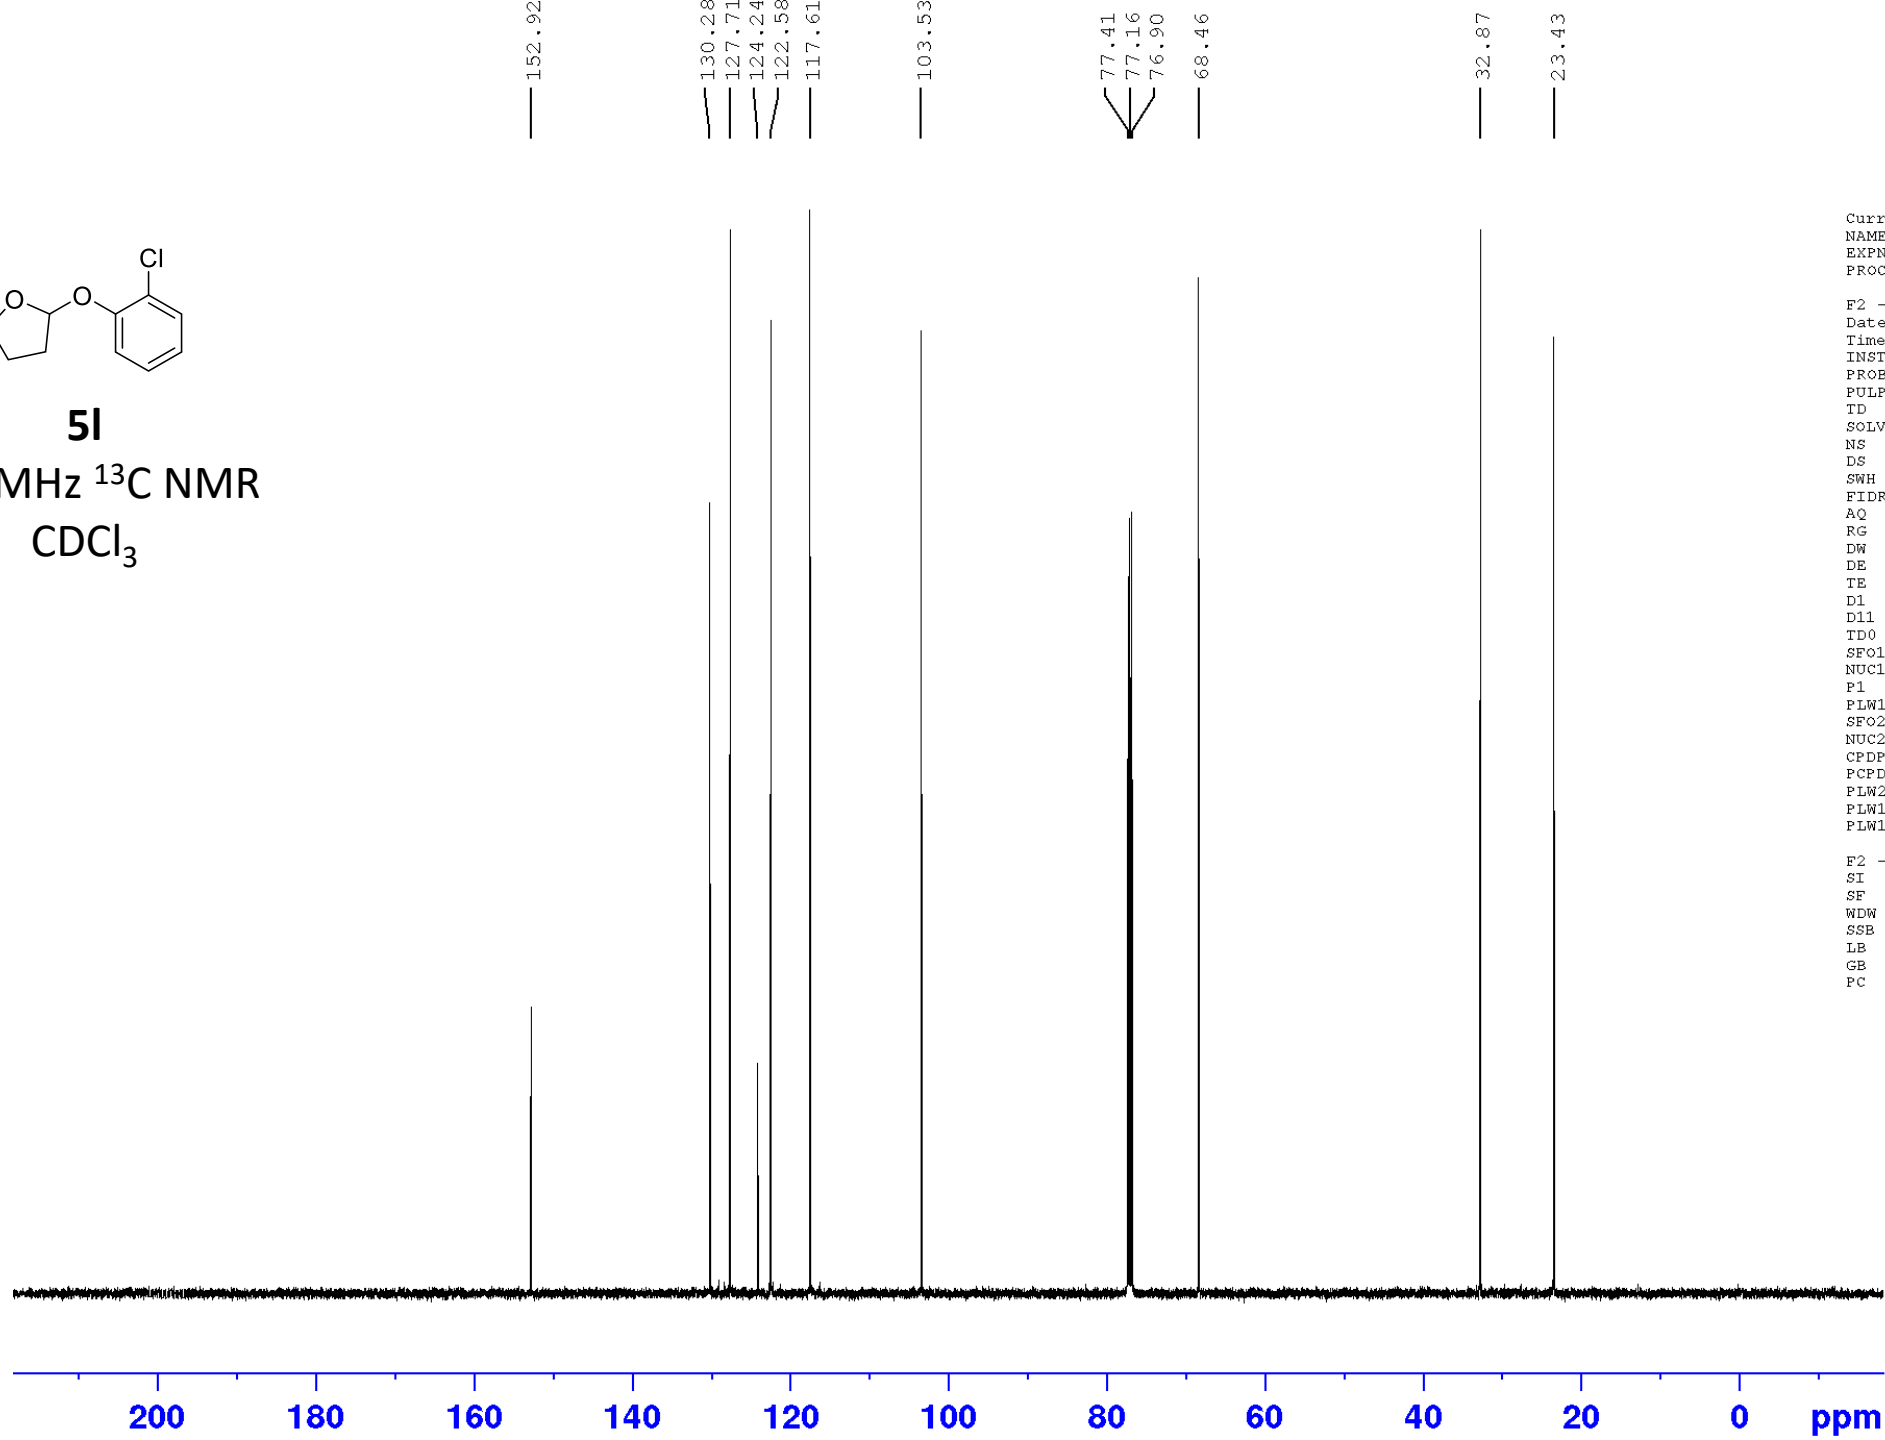

Current Data Parameters  
NAME vinn-4-183-3-isl2-20230321  
EXPNO 2  
PROCNO 1

F2 - Acquisition Parameters  
Date\_ 20230321  
Time 15.53 h  
INSTRUM spect  
PROBHD Z149001\_0010 (  
PULPROG zgpg30  
TD 65536  
SOLVENT CDCl3  
NS 30  
DS 4  
SWH 29761.904 Hz  
FIDRES 0.908261 Hz  
AQ 1.1010048 sec  
RG 206.72  
DW 16.800 usec  
DE 18.00 usec  
TE 296.1 K  
D1 2.0000000 sec  
D11 0.0300000 sec  
TD0 1  
SFO1 125.7703643 MHz  
NUC1 13C  
P1 10.00 usec  
PLW1 73.80999756 W  
SFO2 500.1320005 MHz  
NUC2 1H  
CPDPRG[2] waltz16  
PCPD2 80.00 usec  
PLW2 17.35199928 W  
PLW12 0.34314999 W  
PLW13 0.17260000 W

F2 - Processing parameters  
SI 32768  
SF 125.7577783 MHz  
WDW EM  
SSB 0  
LB 1.00 Hz  
GB 0  
PC 1.40

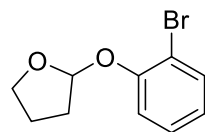

5m  
500 MHz <sup>1</sup>H NMR  
CDCl<sub>3</sub>

7.5333  
7.5303  
7.5175  
7.5145  
7.2624  
7.1920  
6.8857  
6.8522  
  
5.8194  
5.8104  
  
4.1275  
4.0838  
3.9895  
3.9449  
  
2.3490  
2.2993  
2.2773  
2.1931  
2.1709  
2.1014  
2.0068  
1.9320

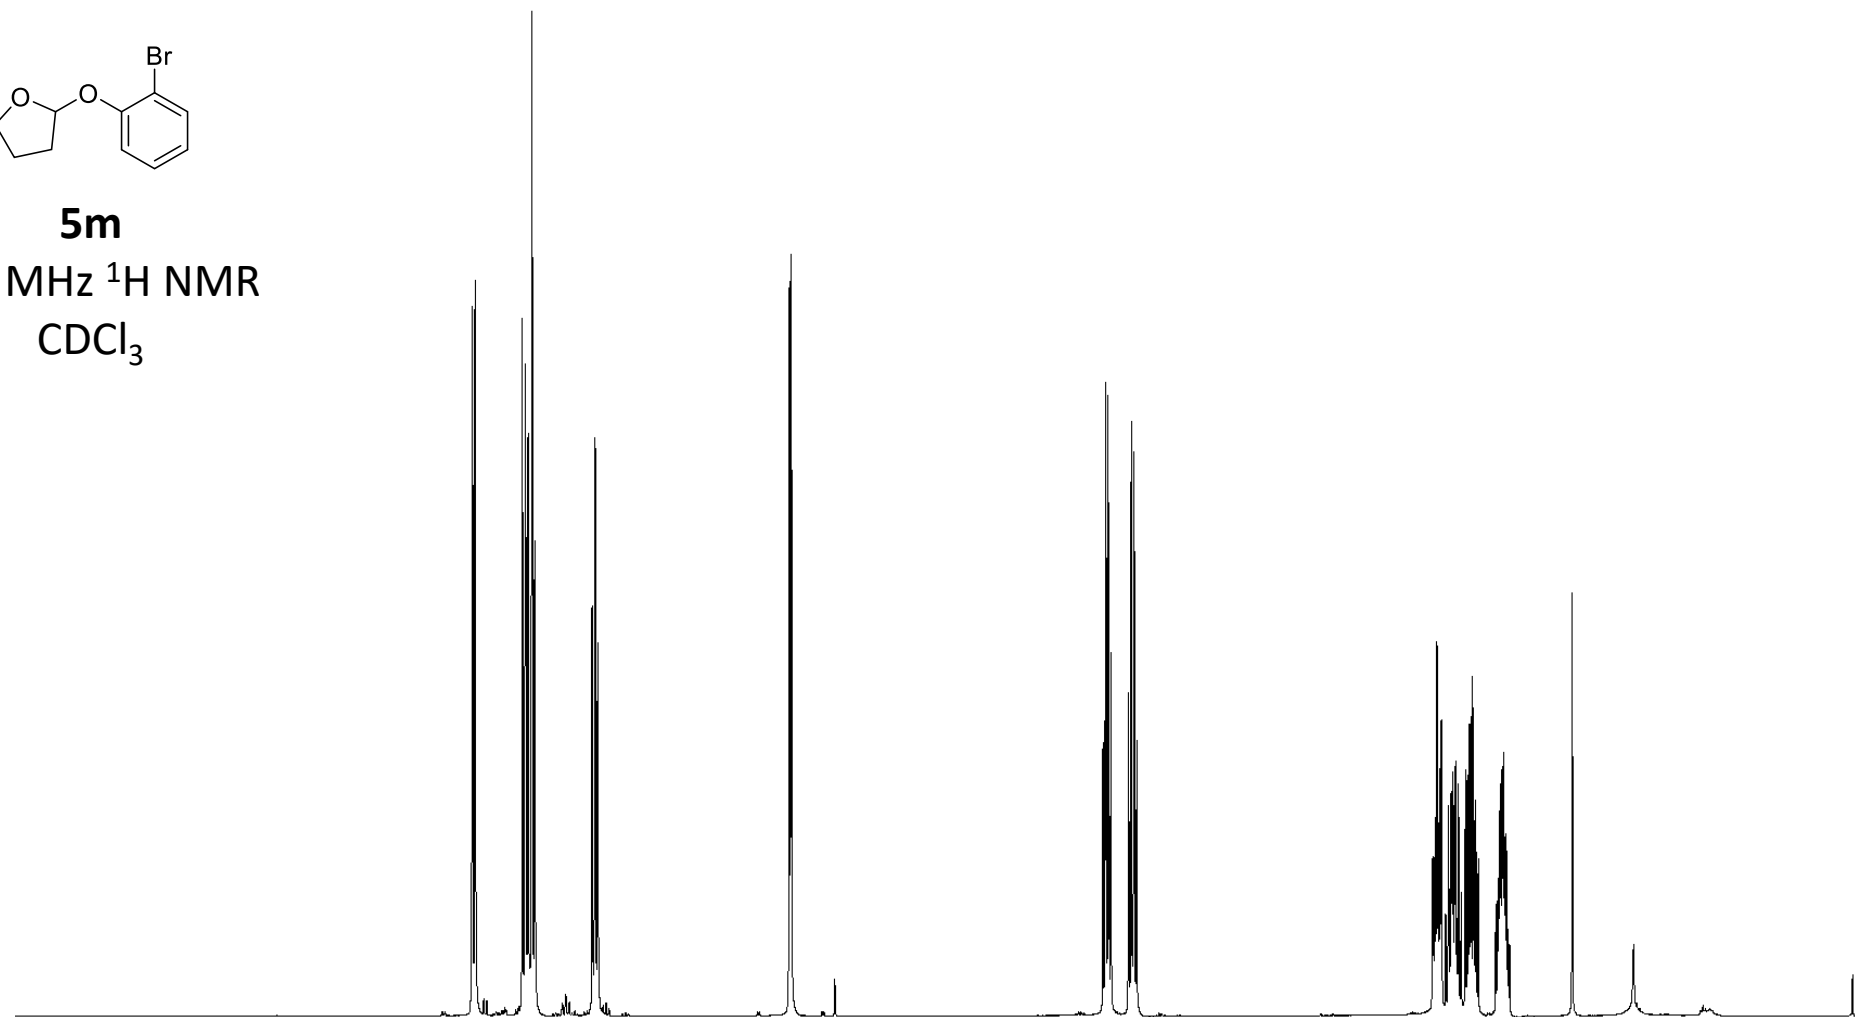

0.95  
2.17  
0.98  
  
1.00  
  
1.04  
1.04  
  
1.04  
1.06  
1.06  
1.02

9 8 7 6 5 4 3 2 1 ppm

```
Current Data Parameters
NAME      vinn-4-147-1-isl-20200121
EXPNO    1
PROCNO   1

F2 - Acquisition Parameters
Date_    20210121
Time     19.07 h
INSTRUM  spect
PROBHD   zg30
PULPROG  zg30
TD       65536
SOLVENT  CDCl3
NS       16
DS       2
SWH      10000.000 Hz
FIDRES   0.305176 Hz
AQ       3.2767999 sec
RG       63.76
DW       50.000 usec
DE       6.50 usec
TE       295.2 K
D1       1.0000000 sec
TD0      1
SFO1     500.1330883 MHz
NUC1     1H
P1       10.91 usec
PLW1     25.0000000 W

F2 - Processing parameters
SI       65536
SF       500.1300110 MHz
WDW      EM
SSB      0
LB       0.30 Hz
GB       0
PC       1.00
```

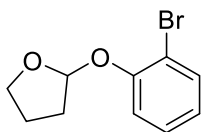

**5m**  
 125 MHz <sup>13</sup>C NMR  
 CDCl<sub>3</sub>

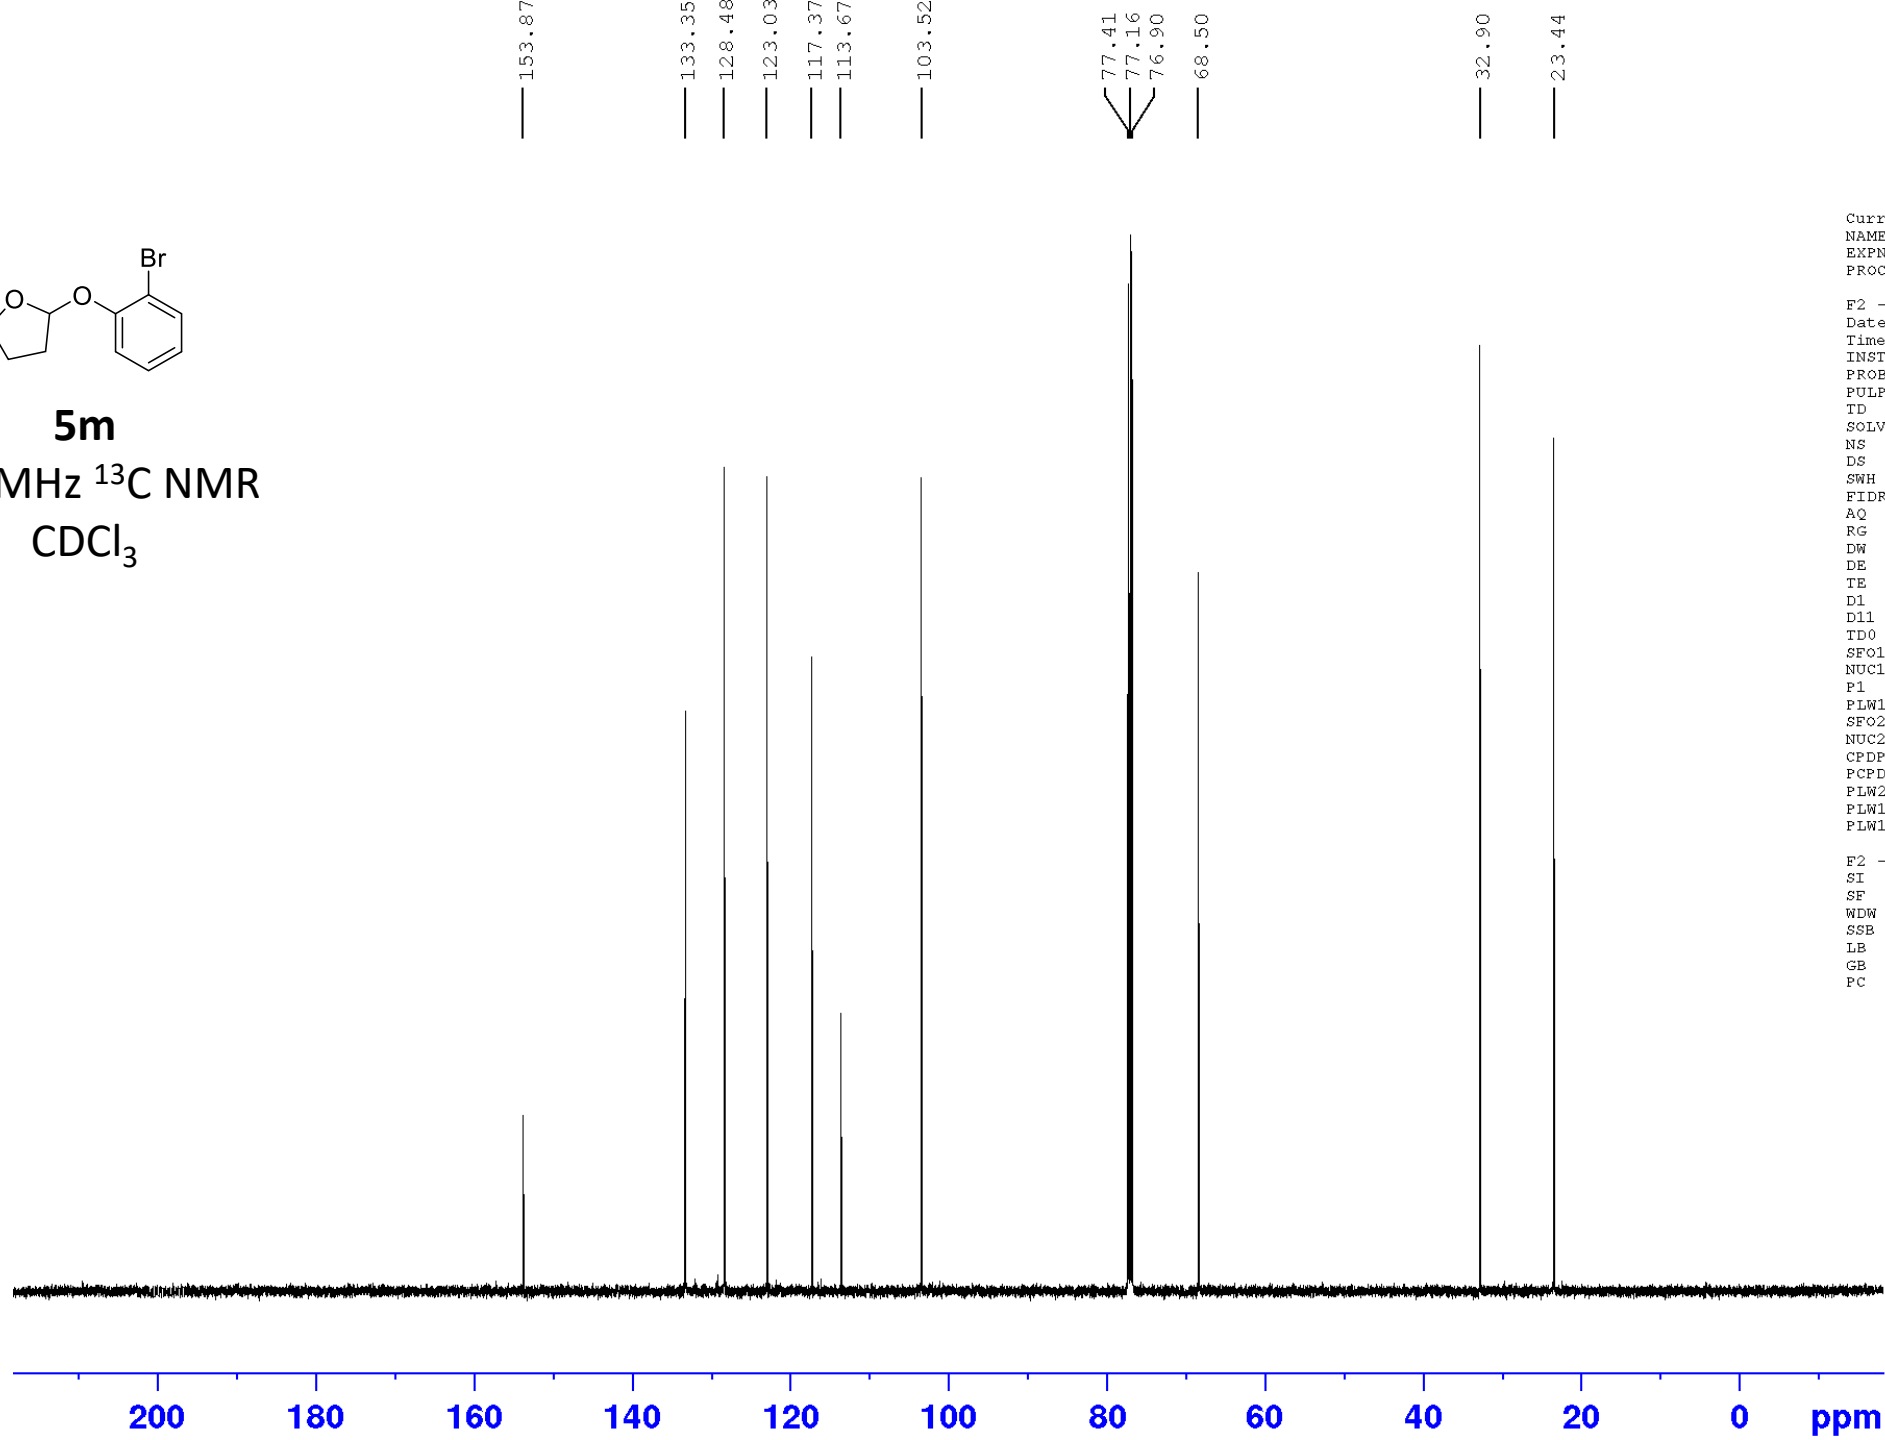

Current Data Parameters  
 NAME vinn-4-147-1-isl-20200121  
 EXPNO 2  
 PROCNO 1

F2 - Acquisition Parameters  
 Date\_ 20210121  
 Time 19.21 h  
 INSTRUM spect  
 PROBHD Z119470\_0283 (  
 PULPROG zgpg30  
 TD 65536  
 SOLVENT CDCl3  
 NS 256  
 DS 4  
 SWH 29761.904 Hz  
 FIDRES 0.908261 Hz  
 AQ 1.1010048 sec  
 RG 206.72  
 DW 16.800 usec  
 DE 6.50 usec  
 TE 295.1 K  
 D1 2.0000000 sec  
 D11 0.0300000 sec  
 TD0 1  
 SFO1 125.7703643 MHz  
 NUC1 13C  
 P1 9.75 usec  
 PLW1 94.0000000 W  
 SFO2 500.1320005 MHz  
 NUC2 1H  
 CPDPRG[2] waltz16  
 PCPD2 80.00 usec  
 PLW2 25.0000000 W  
 PLW12 0.46495000 W  
 PLW13 0.23387000 W

F2 - Processing parameters  
 SI 32768  
 SF 125.7577762 MHz  
 WDW EM  
 SSB 0  
 LB 1.00 Hz  
 GB 0  
 PC 1.40

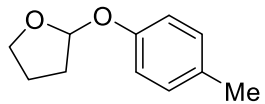

**5n**  
500 MHz <sup>1</sup>H NMR  
CDCl<sub>3</sub>

7.2329  
7.2150  
6.9916  
6.9737

5.3729  
5.3665  
5.3601

3.8958  
3.8474  
3.6160  
3.5749

2.0329  
1.9466  
1.8680  
1.8350  
1.7281  
1.5605

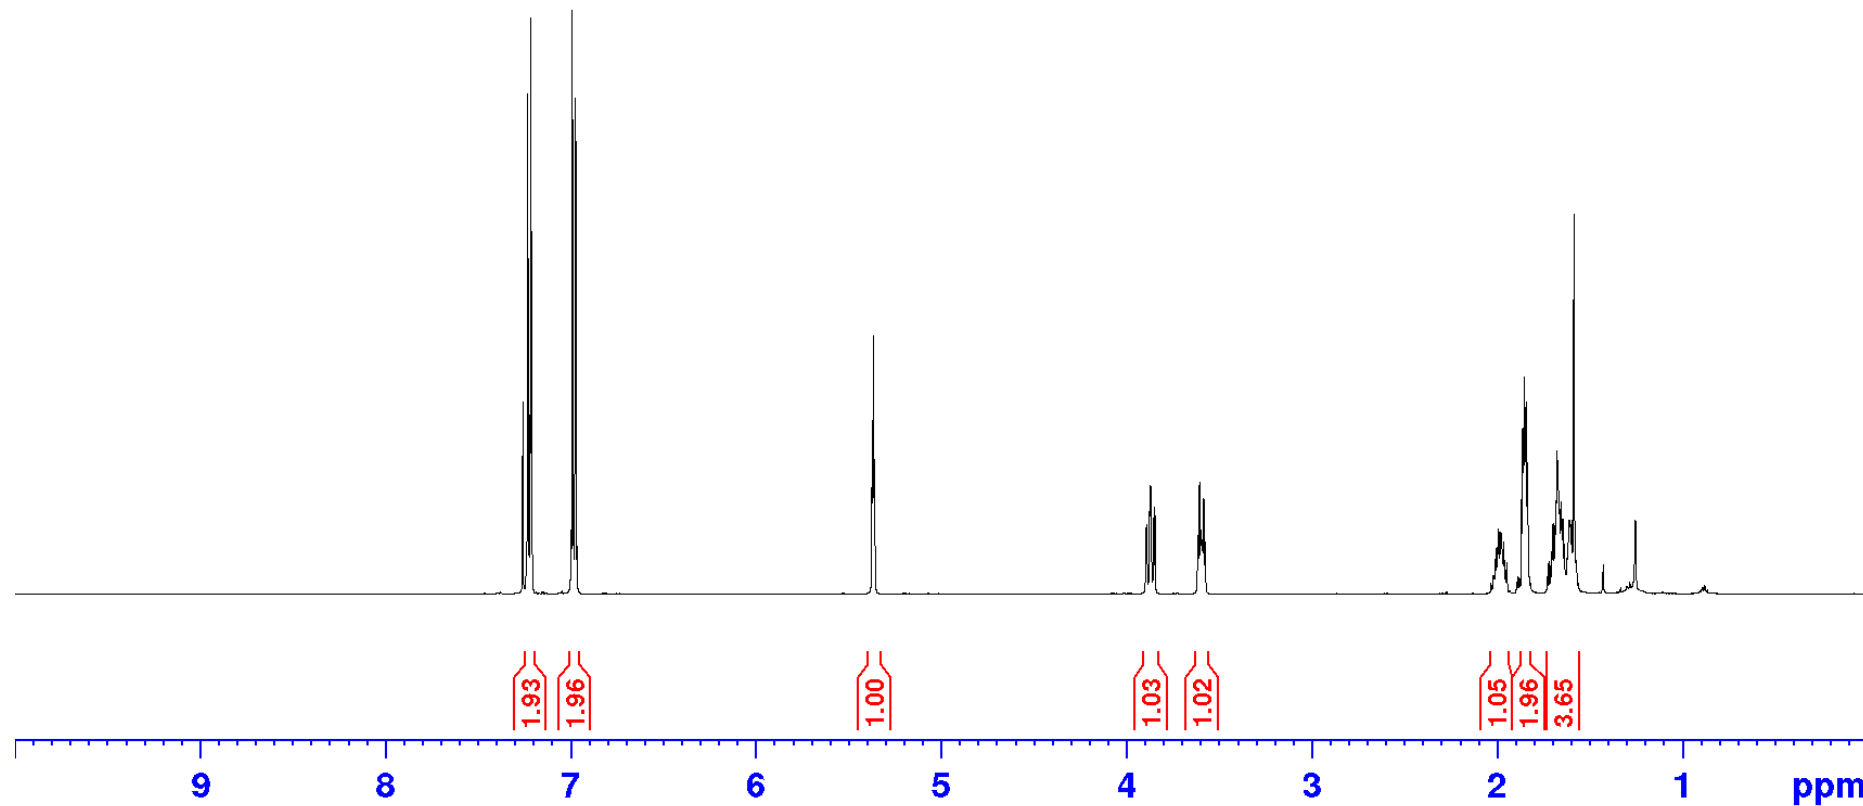

Current Data Parameters  
NAME winn-4-190-2-clm8to9-20230103  
EXPTNO 1  
PROCNO 1

F2 - Acquisition Parameters  
Date\_ 20230103  
Time 16.58 h  
INSTRUM spect  
PROBHD Z119470\_0283 (   
PULPROG zg30  
TD 65536  
SOLVENT CDCl3  
NS 16  
DS 2  
SWH 10000.000 Hz  
FIDRES 0.305176 Hz  
AQ 3.2767999 sec  
RG 102.6  
DW 50.000 usec  
DE 6.50 usec  
TE 295.1 K  
D1 1.00000000 sec  
TD0 1  
SFO1 500.1300883 MHz  
NUC1 1H  
F1 10.91 usec  
PLW1 25.00000000 W

F2 - Processing parameters  
SI 65536  
SF 500.1300128 MHz  
MDW EM  
SSB 0  
LB 0.30 Hz  
GB 0  
PC 1.00



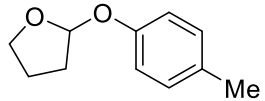

**5n**  
 125 MHz <sup>13</sup>C NMR  
 CDCl<sub>3</sub>

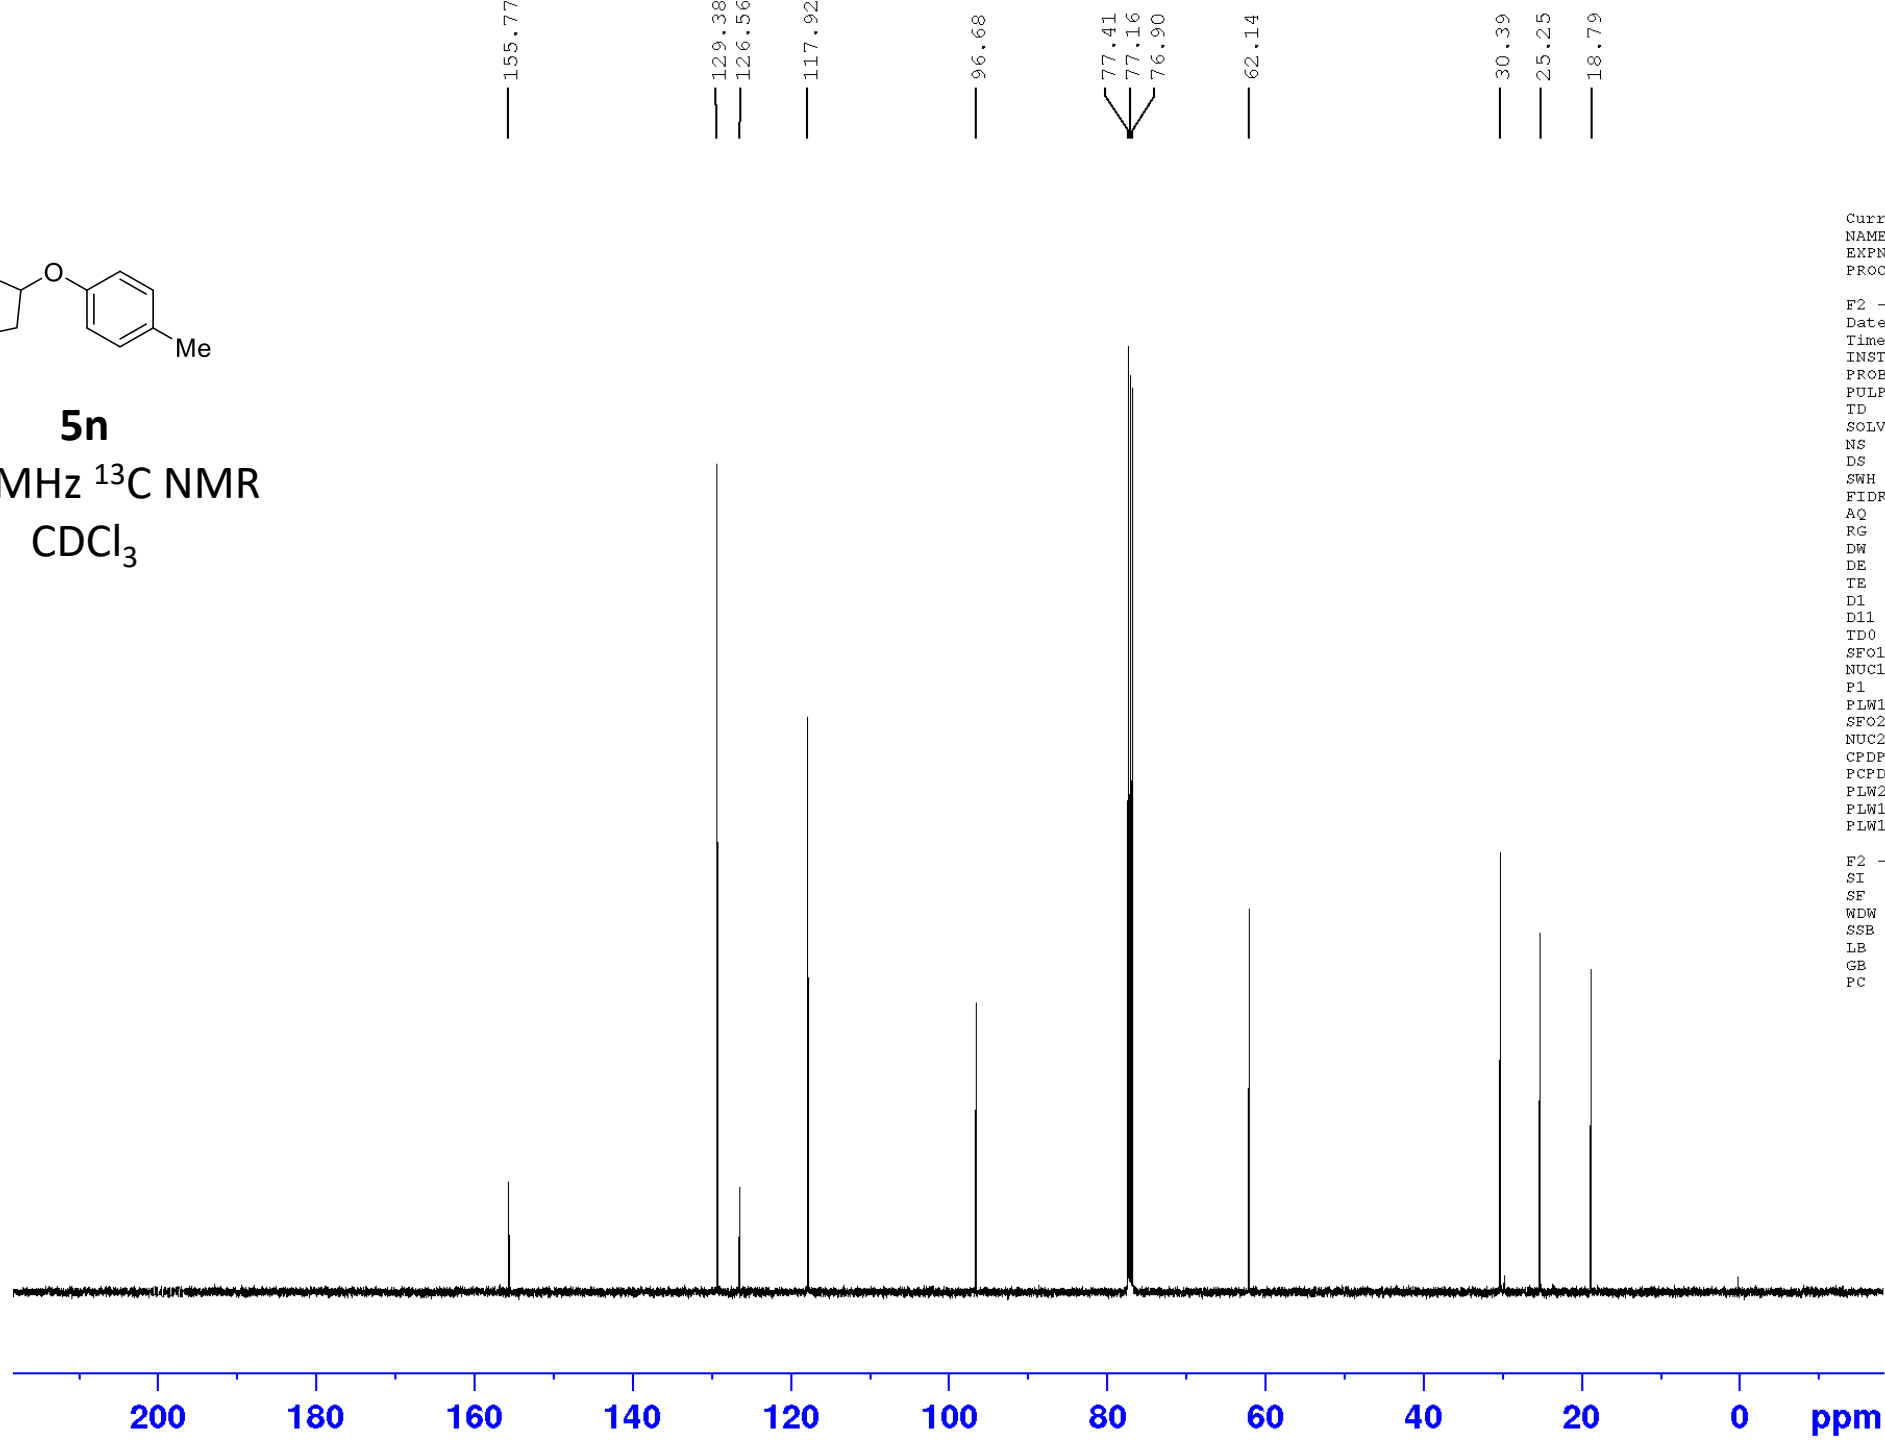

Current Data Parameters  
 NAME vinn-4-190-2-clm8to9-2023010  
 EXPNO 2  
 PROCNO 1

F2 - Acquisition Parameters  
 Date\_ 20230103  
 Time 18.07 h  
 INSTRUM spect  
 PROBHD Z119470\_0283 (  
 PULPROG zgpg30  
 TD 65536  
 SOLVENT CDCl3  
 NS 300  
 DS 4  
 SWH 29761.904 Hz  
 FIDRES 0.908261 Hz  
 AQ 1.1010048 sec  
 RG 206.72  
 DW 16.800 usec  
 DE 6.50 usec  
 TE 295.2 K  
 D1 2.0000000 sec  
 D11 0.03000000 sec  
 TD0 1  
 SFO1 125.7703643 MHz  
 NUC1 13C  
 P1 9.75 usec  
 PLW1 94.0000000 W  
 SFO2 500.1320005 MHz  
 NUC2 1H  
 CPDPRG[2] waltz16  
 PCPD2 80.00 usec  
 PLW2 25.0000000 W  
 PLW12 0.46495000 W  
 PLW13 0.23387000 W

F2 - Processing parameters  
 SI 32768  
 SF 125.7577740 MHz  
 WDW EM  
 SSB 0  
 LB 1.00 Hz  
 GB 0  
 PC 1.40

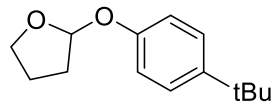

**5o**  
500 MHz <sup>1</sup>H NMR  
CDCl<sub>3</sub>

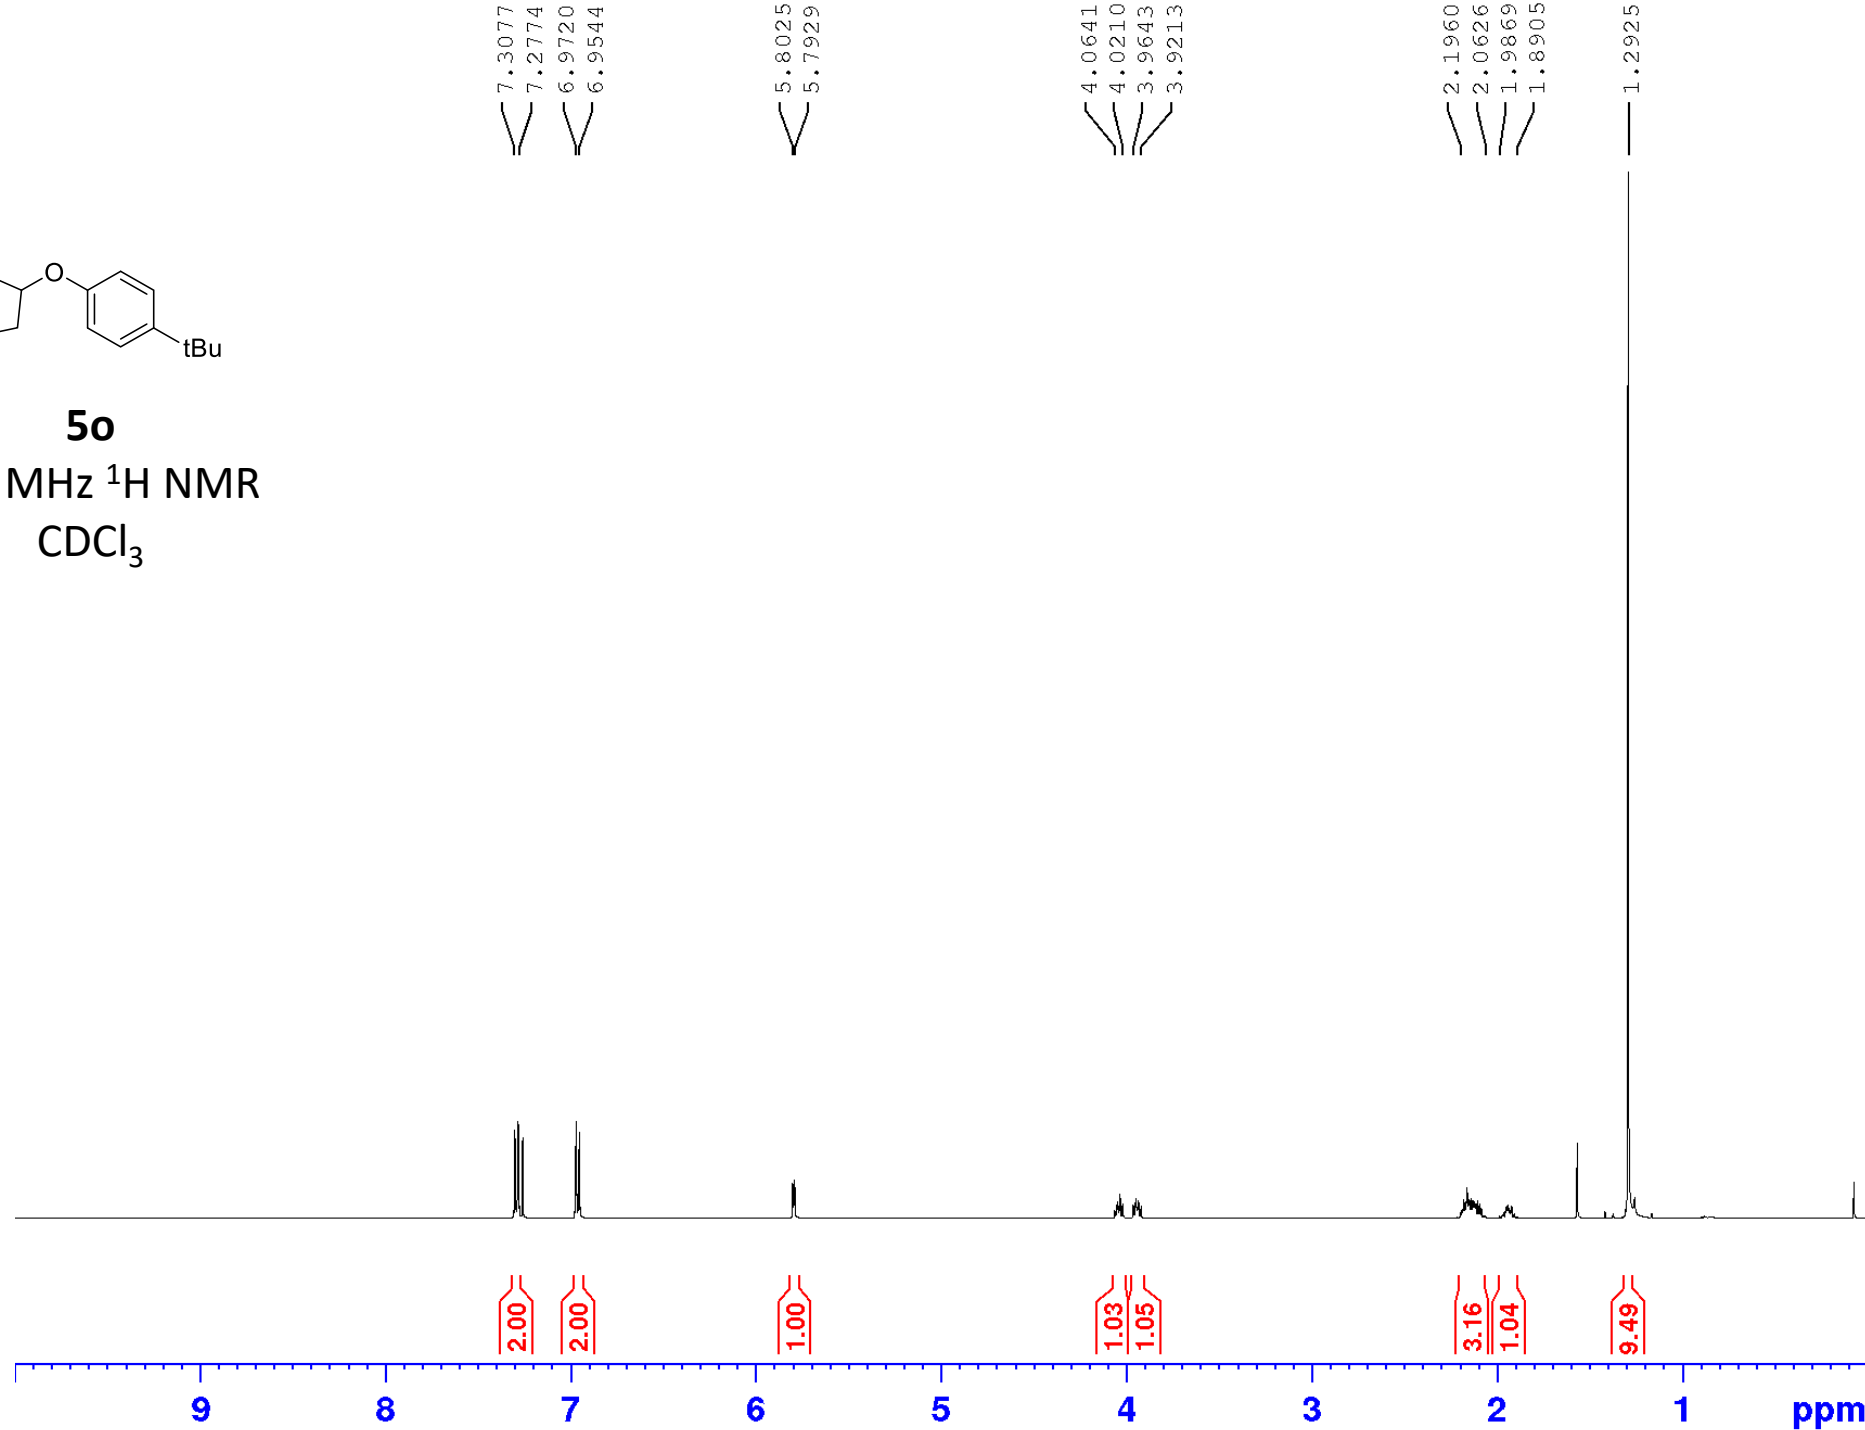

Current Data Parameters  
NAME vinn-4-147-6-isl2-2020012  
EXPNO 1  
PROCNO 1

F2 - Acquisition Parameters  
Date\_ 20210121  
Time 19.25 h  
INSTRUM spect  
PROBHD z119470\_0283 {  
PULPROG zg30  
TD 65536  
SOLVENT cdcl3  
NS 16  
DS 2  
SWH 10000.000 Hz  
FIDRES 0.305176 Hz  
AQ 3.2767999 sec  
RG 93.28  
DW 50.000 usec  
DE 6.50 usec  
TE 295.2 K  
D1 1.00000000 sec  
TD0 1  
SFO1 500.1330883 MHz  
NUC1 1H  
P1 10.91 usec  
PLW1 25.00000000 W

F2 - Processing parameters  
SI 65536  
SF 500.1300122 MHz  
WDW EM  
SSB 0  
LB 0.30 Hz  
GB 0  
PC 1.00

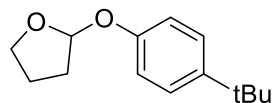

**5o**

125 MHz <sup>13</sup>C NMR  
CDCl<sub>3</sub>

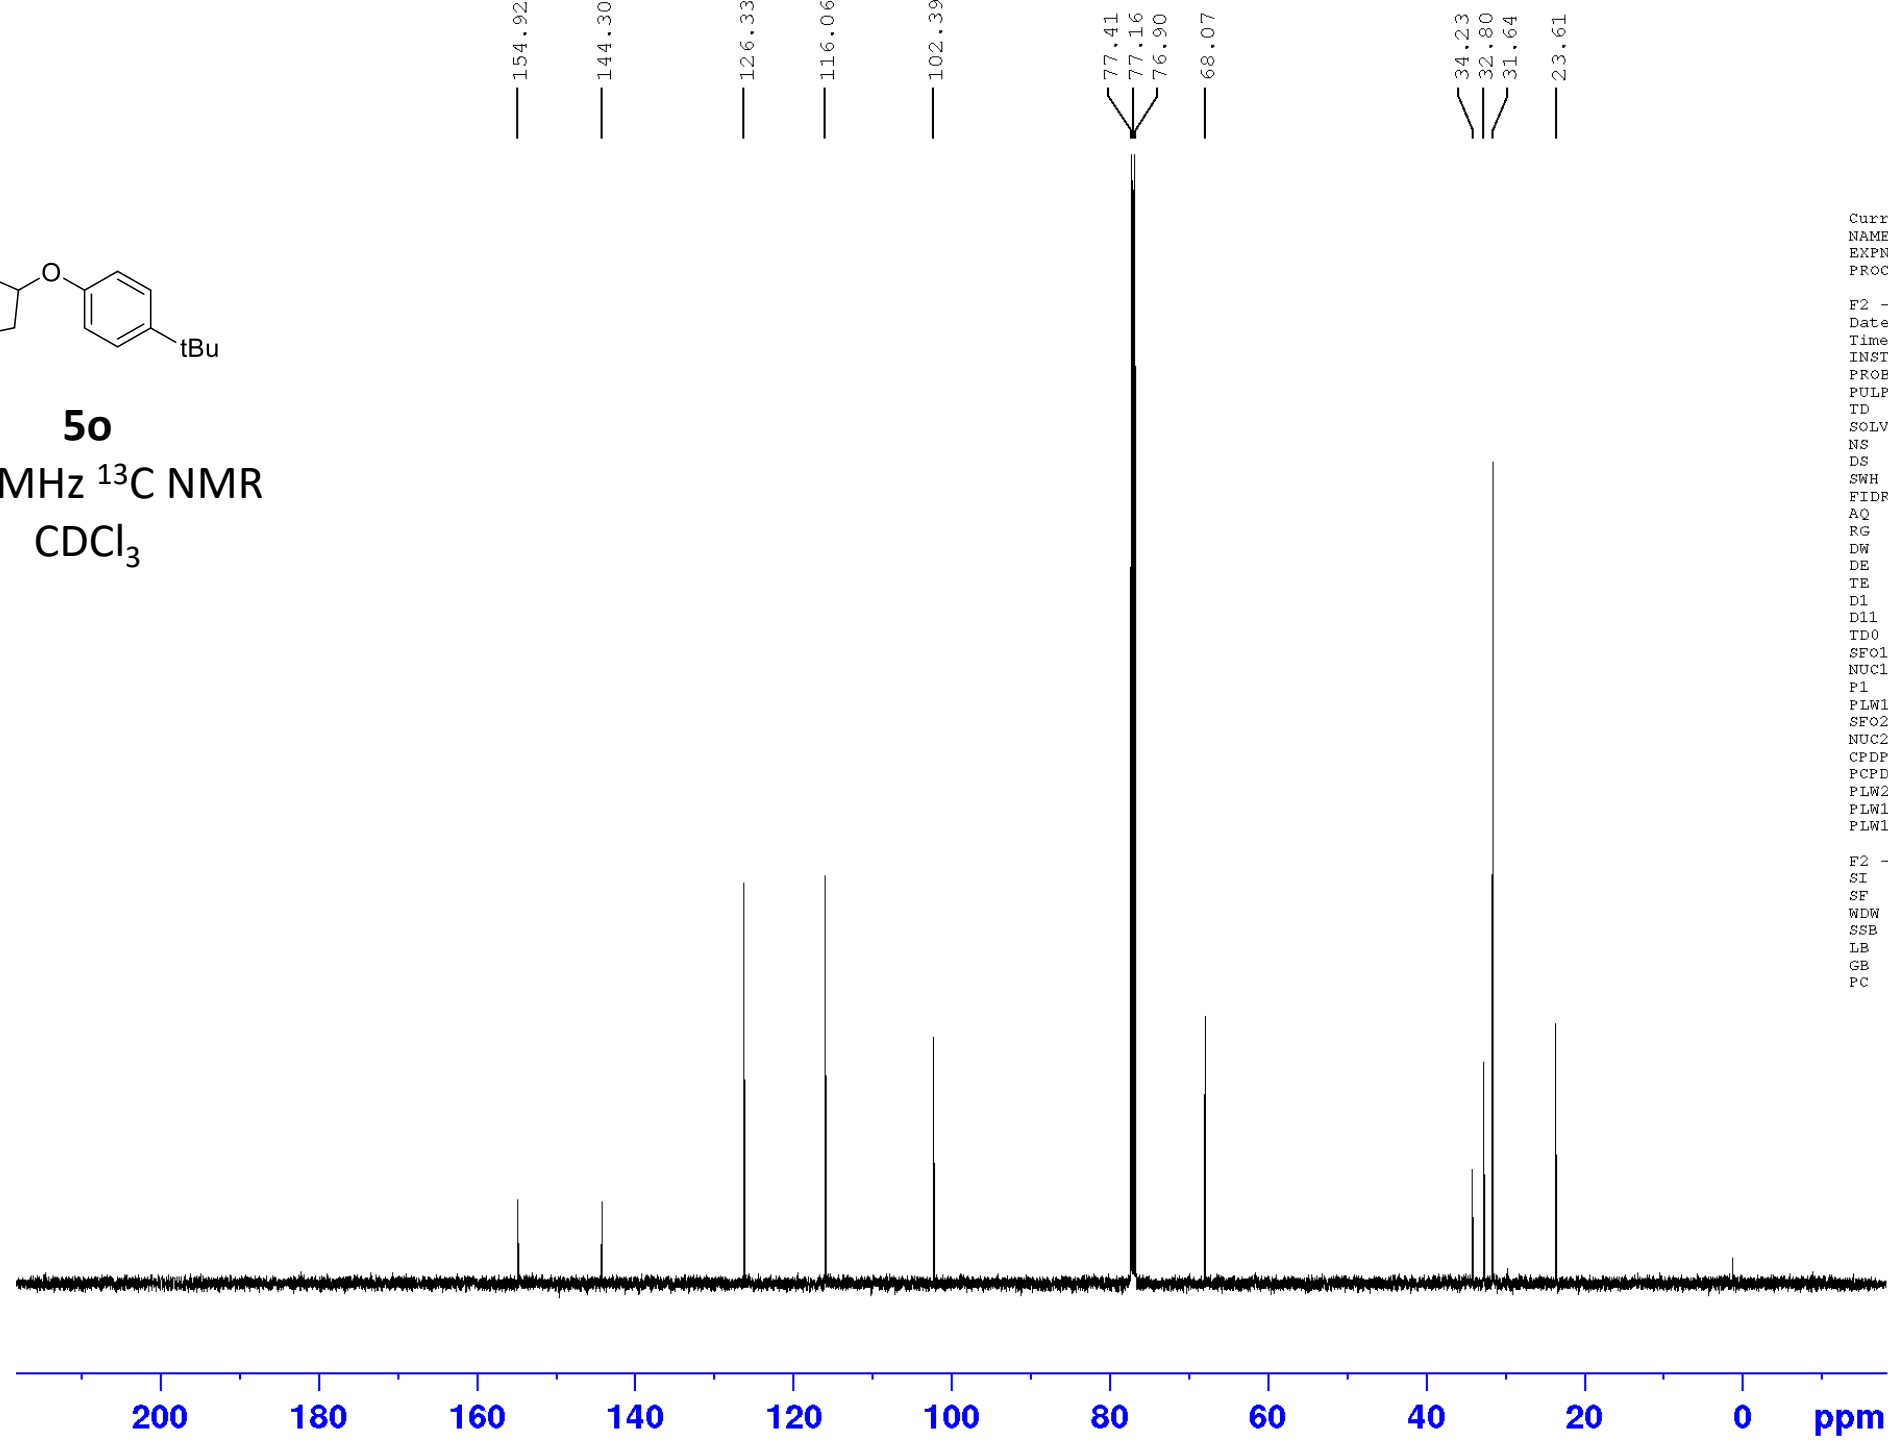

Current Data Parameters  
NAME vinn-4-147-6-isl2-20200121  
EXPNO 2  
PROCNO 1

F2 - Acquisition Parameters  
Date\_ 20210121  
Time 19.39 h  
INSTRUM spect  
PROBHD Z119470\_0283 (  
PULPROG zgpg30  
TD 65536  
SOLVENT CDCl3  
NS 256  
DS 4  
SWH 29761.904 Hz  
FIDRES 0.908261 Hz  
AQ 1.1010048 sec  
RG 206.72  
DW 16.800 usec  
DE 6.50 usec  
TE 295.2 K  
D1 2.0000000 sec  
D11 0.0300000 sec  
TD0 1  
SFO1 125.7703643 MHz  
NUC1 13C  
P1 9.75 usec  
PLW1 94.0000000 W  
SFO2 500.1320005 MHz  
NUC2 1H  
CPDPRG[2] waltz16  
PCPD2 80.00 usec  
PLW2 25.0000000 W  
PLW12 0.46495000 W  
PLW13 0.23387000 W

F2 - Processing parameters  
SI 32768  
SF 125.7577731 MHz  
WDW EM  
SSB 0  
LB 1.00 Hz  
GB 0  
PC 1.40

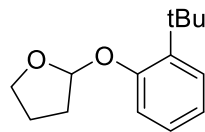

**5p**  
400 MHz <sup>1</sup>H NMR  
CDCl<sub>3</sub>

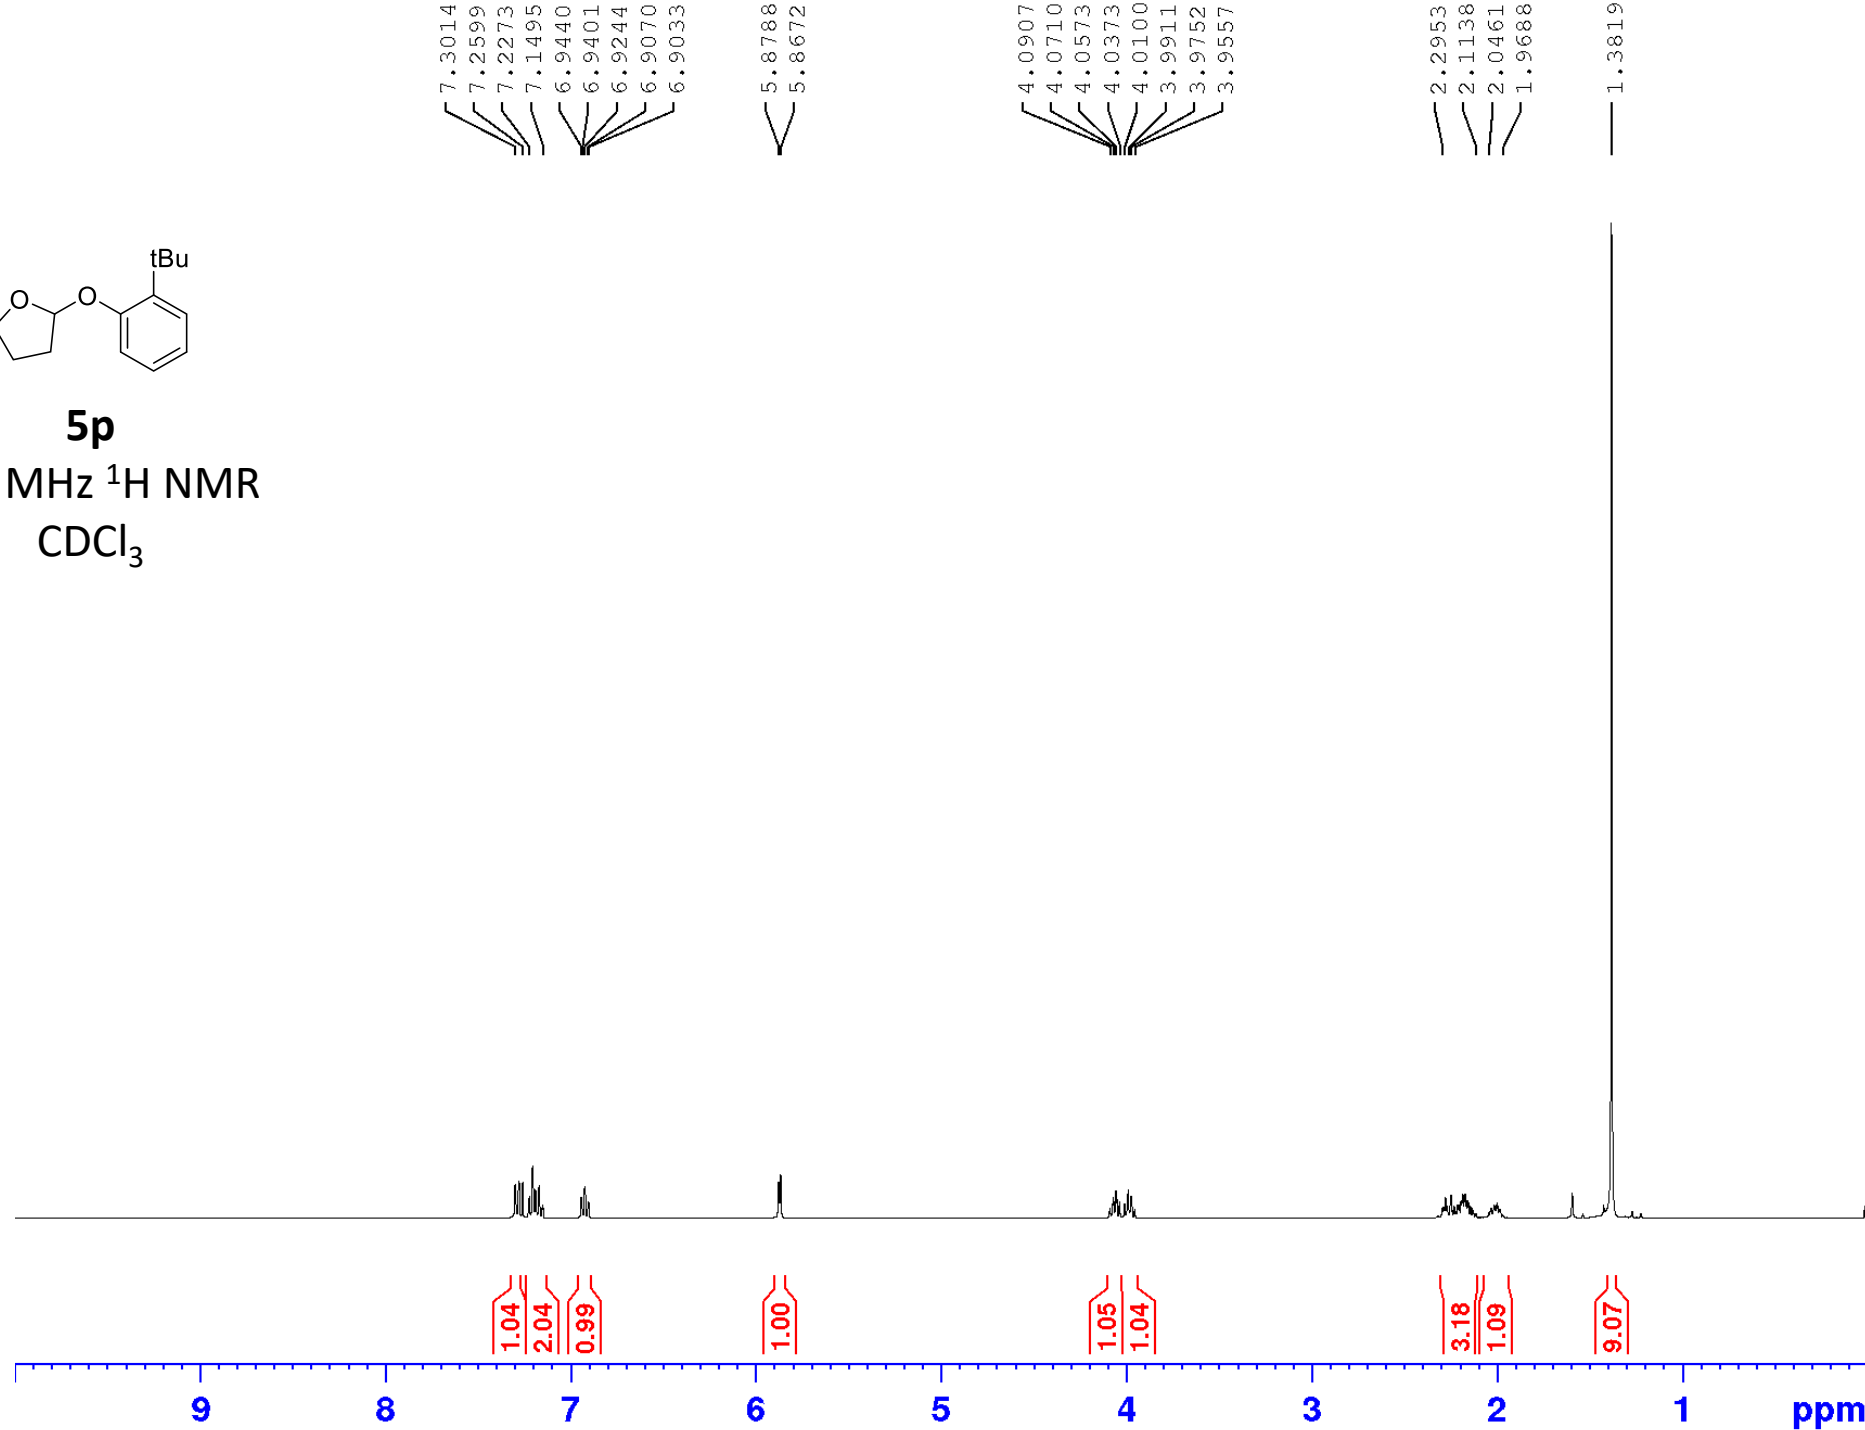

```

Current Data Parameters
NAME      vinn-4-183-4-isl-20230320
EXPNO    1
PROCNO   1

F2 - Acquisition Parameters
Date_    20230320
Time     18.18 h
INSTRUM  spect
PROBHD   E108618_0257 {
PULPROG  zg30
TD        65536
SOLVENT  CDCl3
NS        16
DS        2
SWH       8012.820 Hz
FIDRES    0.244532 Hz
AQ        4.0894465 sec
RG        80.6
DW        62.400 usec
DE        6.50 usec
TE        295.4 K
D1        1.00000000 sec
TD0       1
SFO1     400.1324708 MHz
NUC1      1H
P1        15.00 usec
PLW1     12.50000000 W

F2 - Processing parameters
SI        65536
SF        400.1300101 MHz
WDW       EM
SSB       0
LB        0.30 Hz
GB        0
PC        1.00
  
```

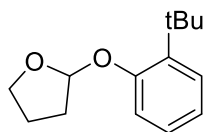

**5p**

100 MHz <sup>13</sup>C NMR  
CDCl<sub>3</sub>

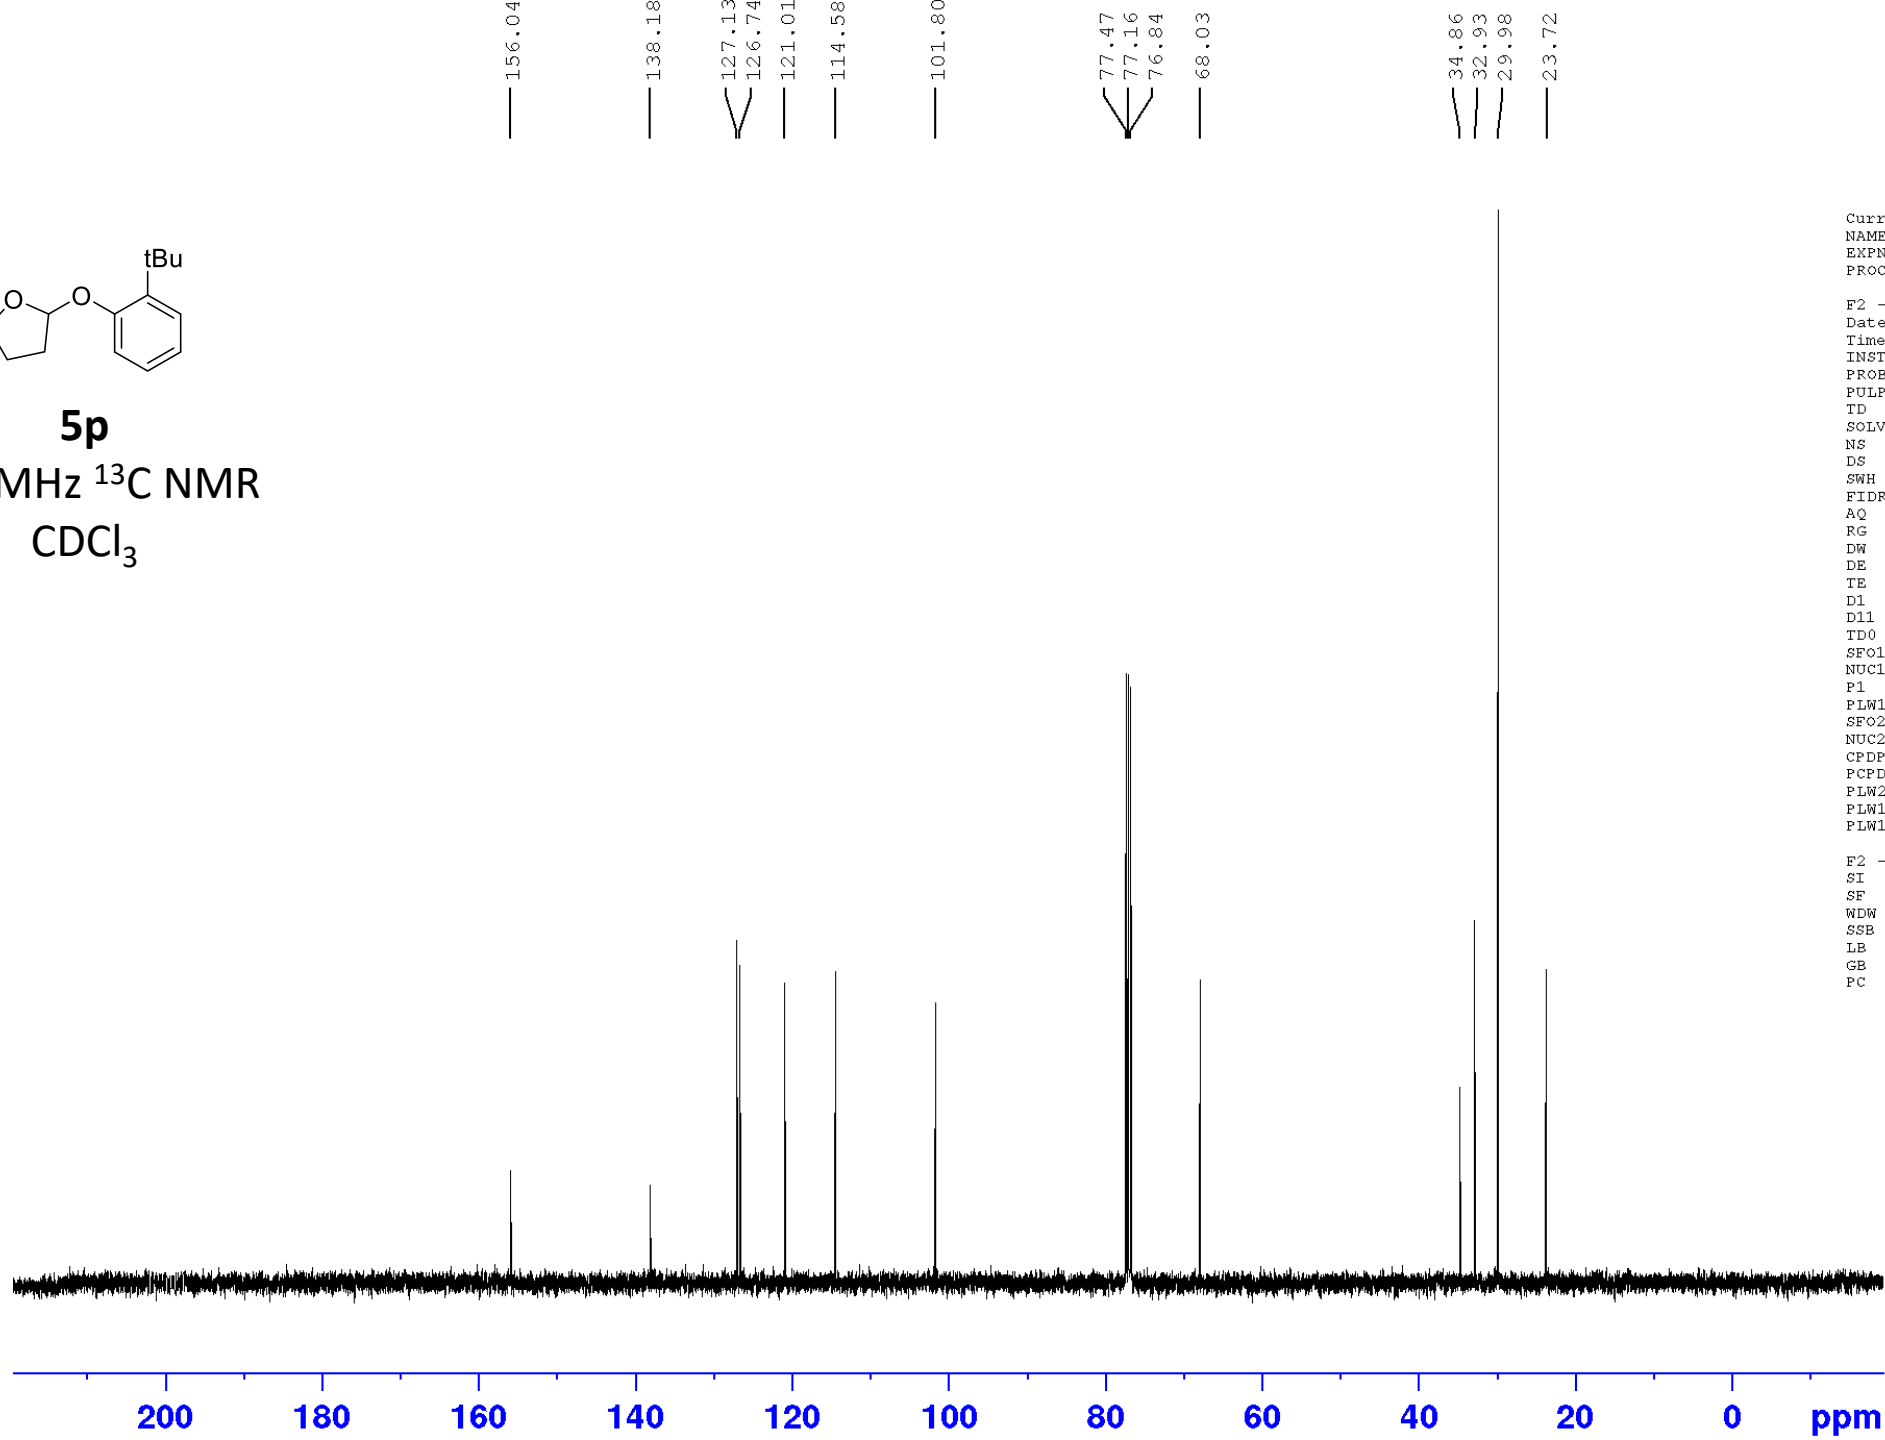

Current Data Parameters  
NAME vinn-4-183-4-islt-20230320  
EXPNO 2  
PROCNO 1

F2 - Acquisition Parameters  
Date\_ 20230320  
Time 18.22 h  
INSTRUM spect  
PROBHD Z108618\_0257 (  
PULPROG zgpg30  
TD 65536  
SOLVENT CDCl3  
NS 40  
DS 4  
SWH 24038.461 Hz  
FIDRES 0.733596 Hz  
AQ 1.3631488 sec  
RG 203  
DW 20.800 usec  
DE 6.50 usec  
TE 295.8 K  
D1 2.0000000 sec  
D11 0.0300000 sec  
TD0 1  
SFO1 100.6228298 MHz  
NUC1 13C  
P1 10.00 usec  
PLW1 51.0000000 W  
SFO2 400.1316005 MHz  
NUC2 1H  
CPDPRG[2] waltz16  
PCPD2 90.00 usec  
PLW2 12.5000000 W  
PLW12 0.34722000 W  
PLW13 0.17465000 W

F2 - Processing parameters  
SI 32768  
SF 100.6127584 MHz  
WDW EM  
SSB 0  
LB 1.00 Hz  
GB 0  
PC 1.40

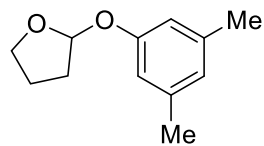

**5q**  
500 MHz <sup>1</sup>H NMR  
CDCl<sub>3</sub>

6.6858  
6.6477  
6.6468

5.8152  
5.8133  
5.8057

4.0878  
4.0448  
3.9820  
3.9392

2.3015  
2.1995  
2.0942  
2.0015  
1.9205

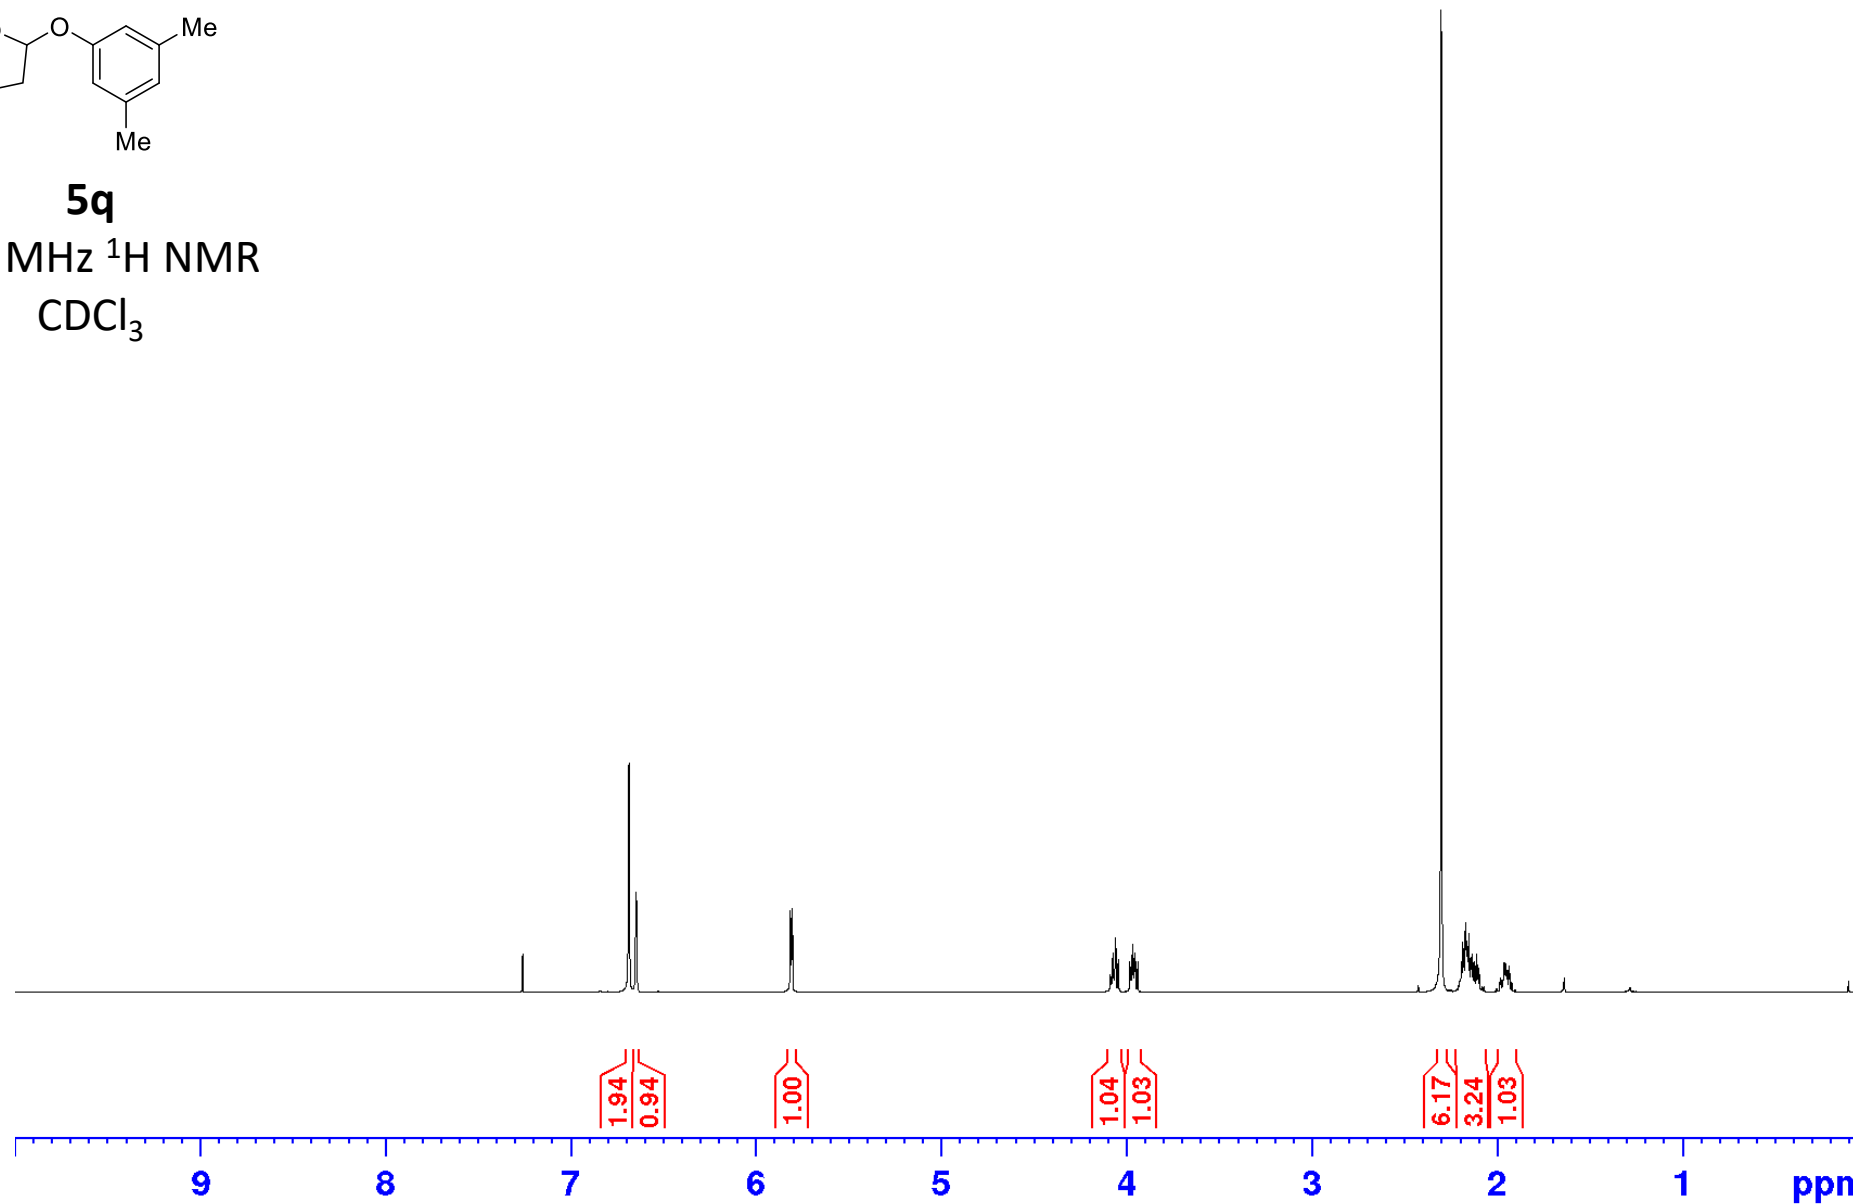

```
Current Data Parameters
NAME      vinn-4-147-7-isl-20200120
EXPNO     3
PROCNO    1

F2 - Acquisition Parameters
Date_     20210121
Time      18.38 h
INSTRUM   spect
PROBHD    E119470_0283 {
PULPROG   zg30
TD         65536
SOLVENT   CDCl3
NS         16
DS         2
SWH        10000.000 Hz
FIDRES     0.305176 Hz
AQ         3.2767999 sec
RG         30.85
DW         50.000 usec
DE         6.50 usec
TE         295.1 K
D1         1.00000000 sec
TD0        1
SFO1      500.1330883 MHz
NUC1       1H
P1         10.91 usec
PLW1       25.00000000 W

F2 - Processing parameters
SI         65536
SF         500.1300122 MHz
WDW        EM
SSB        0
LB         0.30 Hz
GB         0
PC         1.00
```

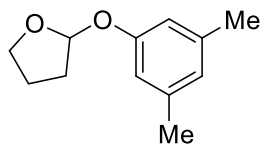

**5q**

125 MHz <sup>13</sup>C NMR  
CDCl<sub>3</sub>

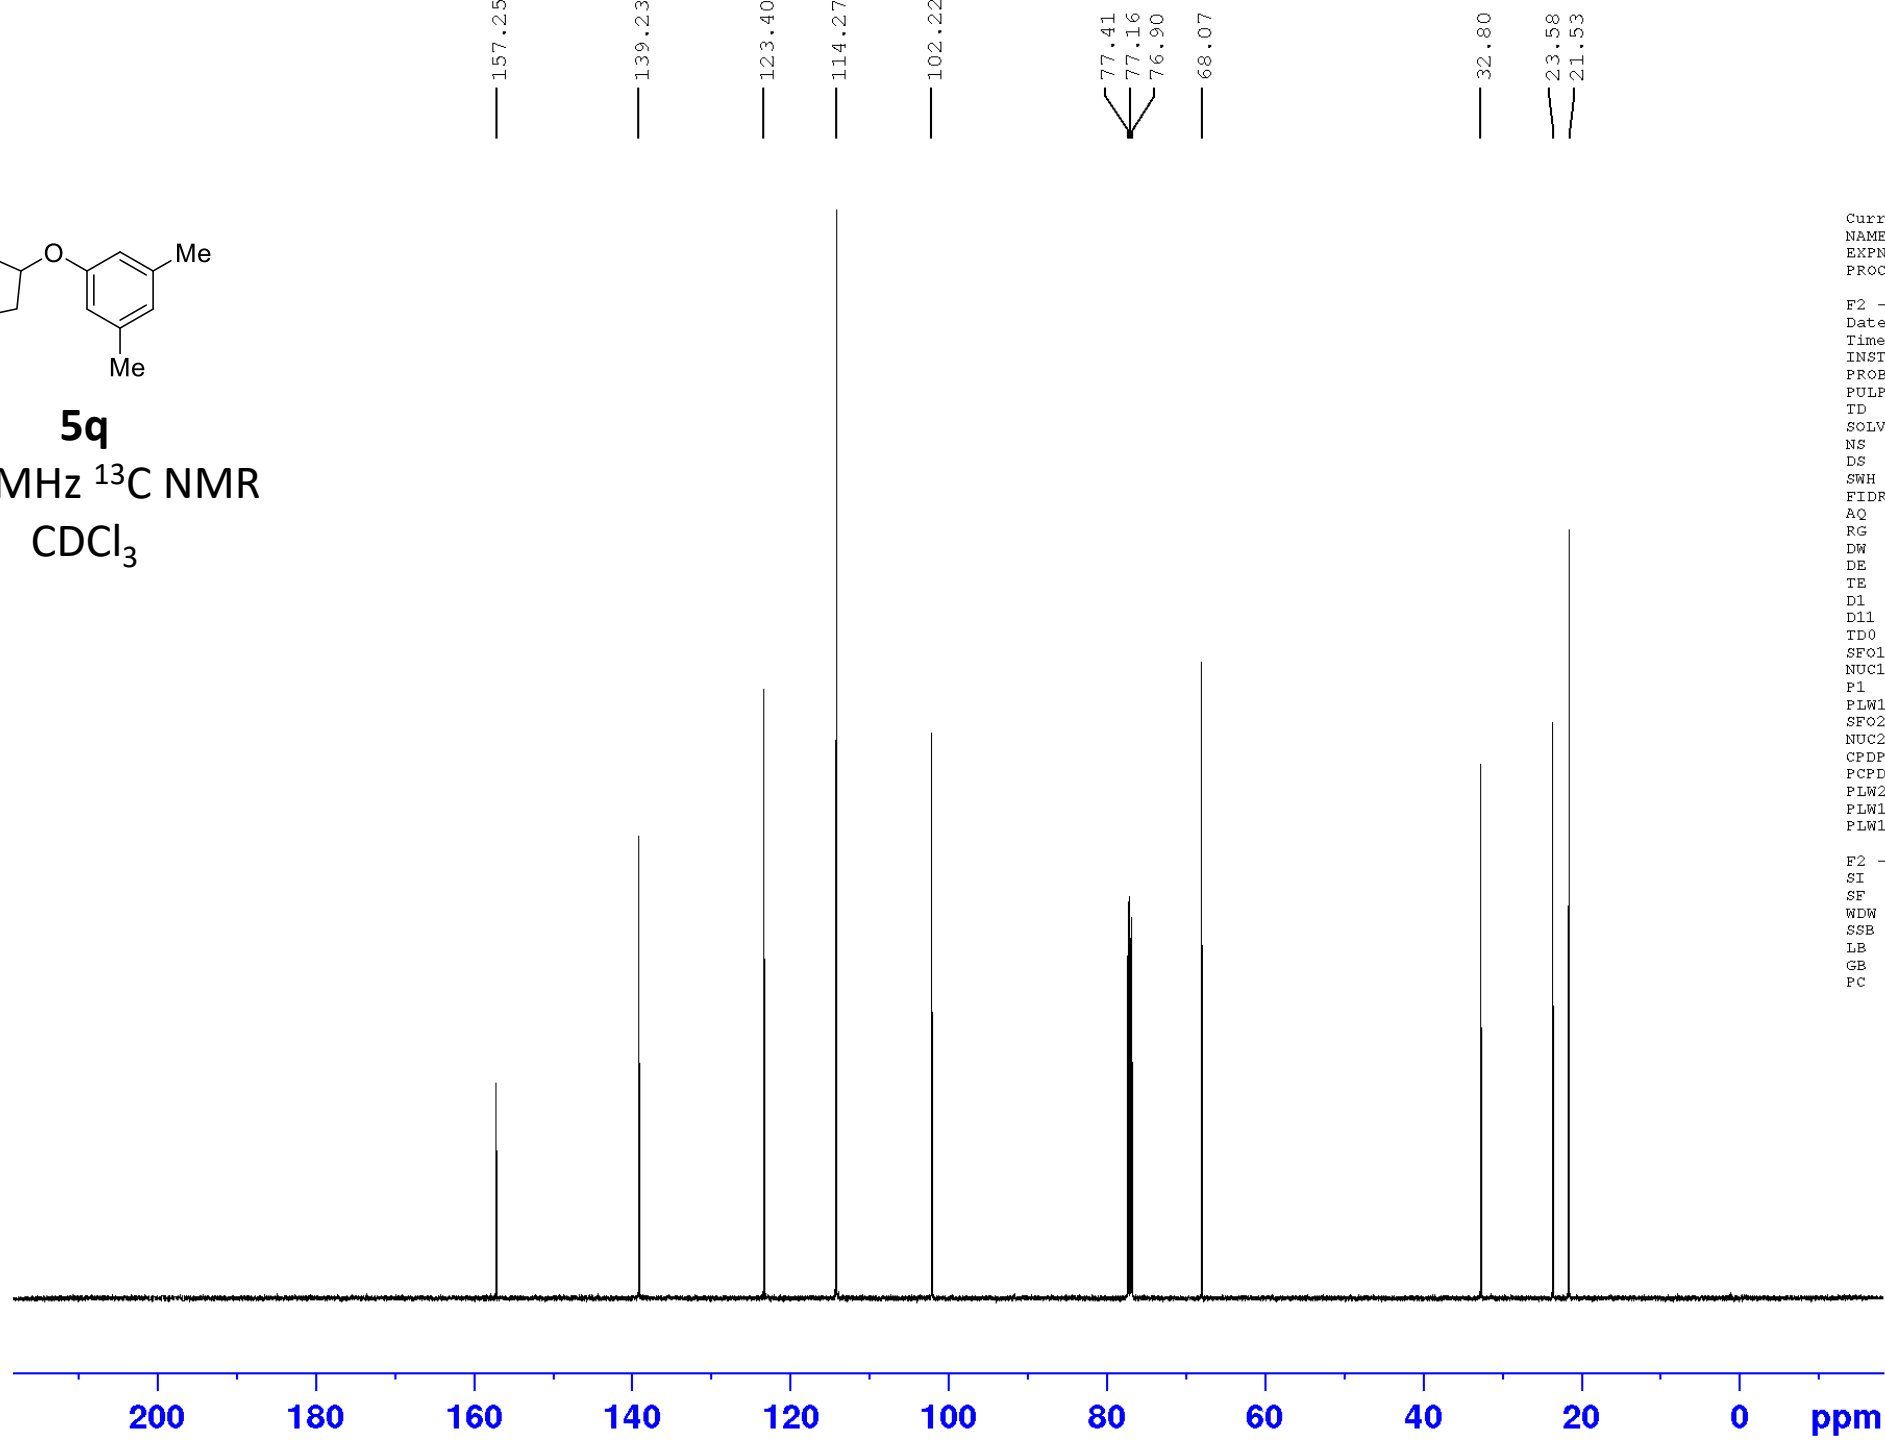

Current Data Parameters  
 NAME vinn-4-147-7-islit-20200120  
 EXPNO 4  
 PROCNO 1

F2 - Acquisition Parameters

Date\_ 20210121  
 Time 18.52 h  
 INSTRUM spect  
 PROBHD Z119470\_0283 (  
 PULPROG zgpg30  
 TD 65536  
 SOLVENT CDCl3  
 NS 256  
 DS 4  
 SWH 29761.904 Hz  
 FIDRES 0.908261 Hz  
 AQ 1.1010048 sec  
 RG 206.72  
 DW 16.800 usec  
 DE 6.50 usec  
 TE 295.2 K  
 D1 2.0000000 sec  
 D11 0.03000000 sec  
 TD0 1  
 SFO1 125.7703643 MHz  
 NUC1 13C  
 P1 9.75 usec  
 PLW1 94.0000000 W  
 SFO2 500.1320005 MHz  
 NUC2 1H  
 CPDPRG[2] waltz16  
 PCPD2 80.00 usec  
 PLW2 25.0000000 W  
 PLW12 0.46495000 W  
 PLW13 0.23387000 W

F2 - Processing parameters

SI 32768  
 SF 125.7577797 MHz  
 WDW EM  
 SSB 0  
 LB 1.00 Hz  
 GB 0  
 PC 1.40

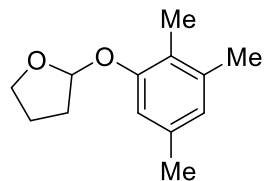

5r

500 MHz <sup>1</sup>H NMR  
CDCl<sub>3</sub>

6.8476  
6.6741  
5.7954  
5.7860  
4.1134  
4.0708  
3.9934  
3.9507  
2.3065  
2.2475  
2.1110  
2.0196  
1.9429

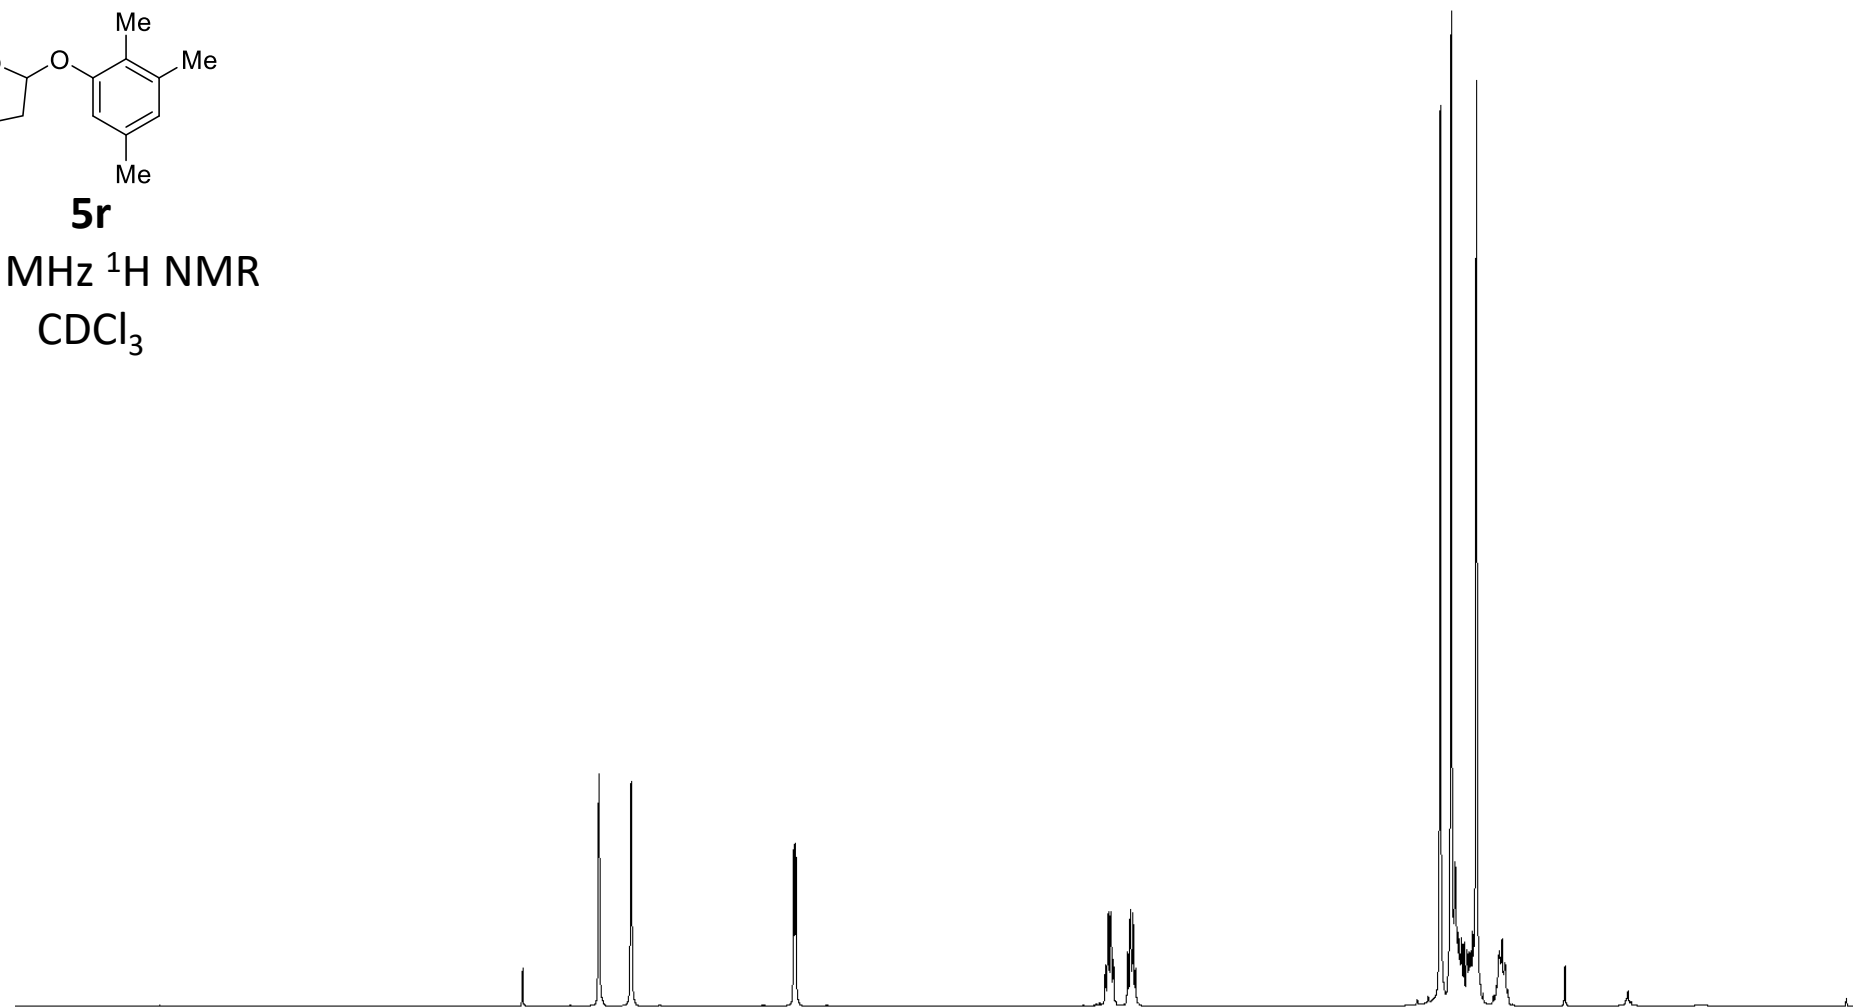

1.00  
0.99  
1.02  
1.07  
1.06  
3.22  
9.73  
1.07

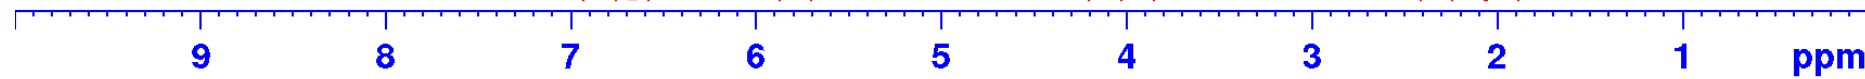

```
Current Data Parameters
NAME      vinn-4-147-8-isl-20200120
EXPNO    1
PROCNO   1

F2 - Acquisition Parameters
Date_    20210121
Time     7.22 h
INSTRUM  spect
PROBHD   E119470_0283 {
PULPROG  zg30
TD       65536
SOLVENT  CDCl3
NS       16
DS       2
SWH      10000.000 Hz
FIDRES   0.305176 Hz
AQ       3.2767999 sec
RG       30.85
DW       50.000 usec
DE       6.50 usec
TE       295.1 K
D1       1.00000000 sec
TD0      1
SFO1     500.1330883 MHz
NUC1     1H
P1       10.91 usec
PLW1     25.00000000 W

F2 - Processing parameters
SI       65536
SF       500.1300125 MHz
WDW      EM
SSB      0
LB       0.30 Hz
GB       0
PC       1.00
```



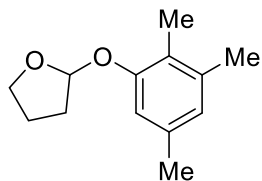

**5r**

125 MHz <sup>13</sup>C NMR  
CDCl<sub>3</sub>

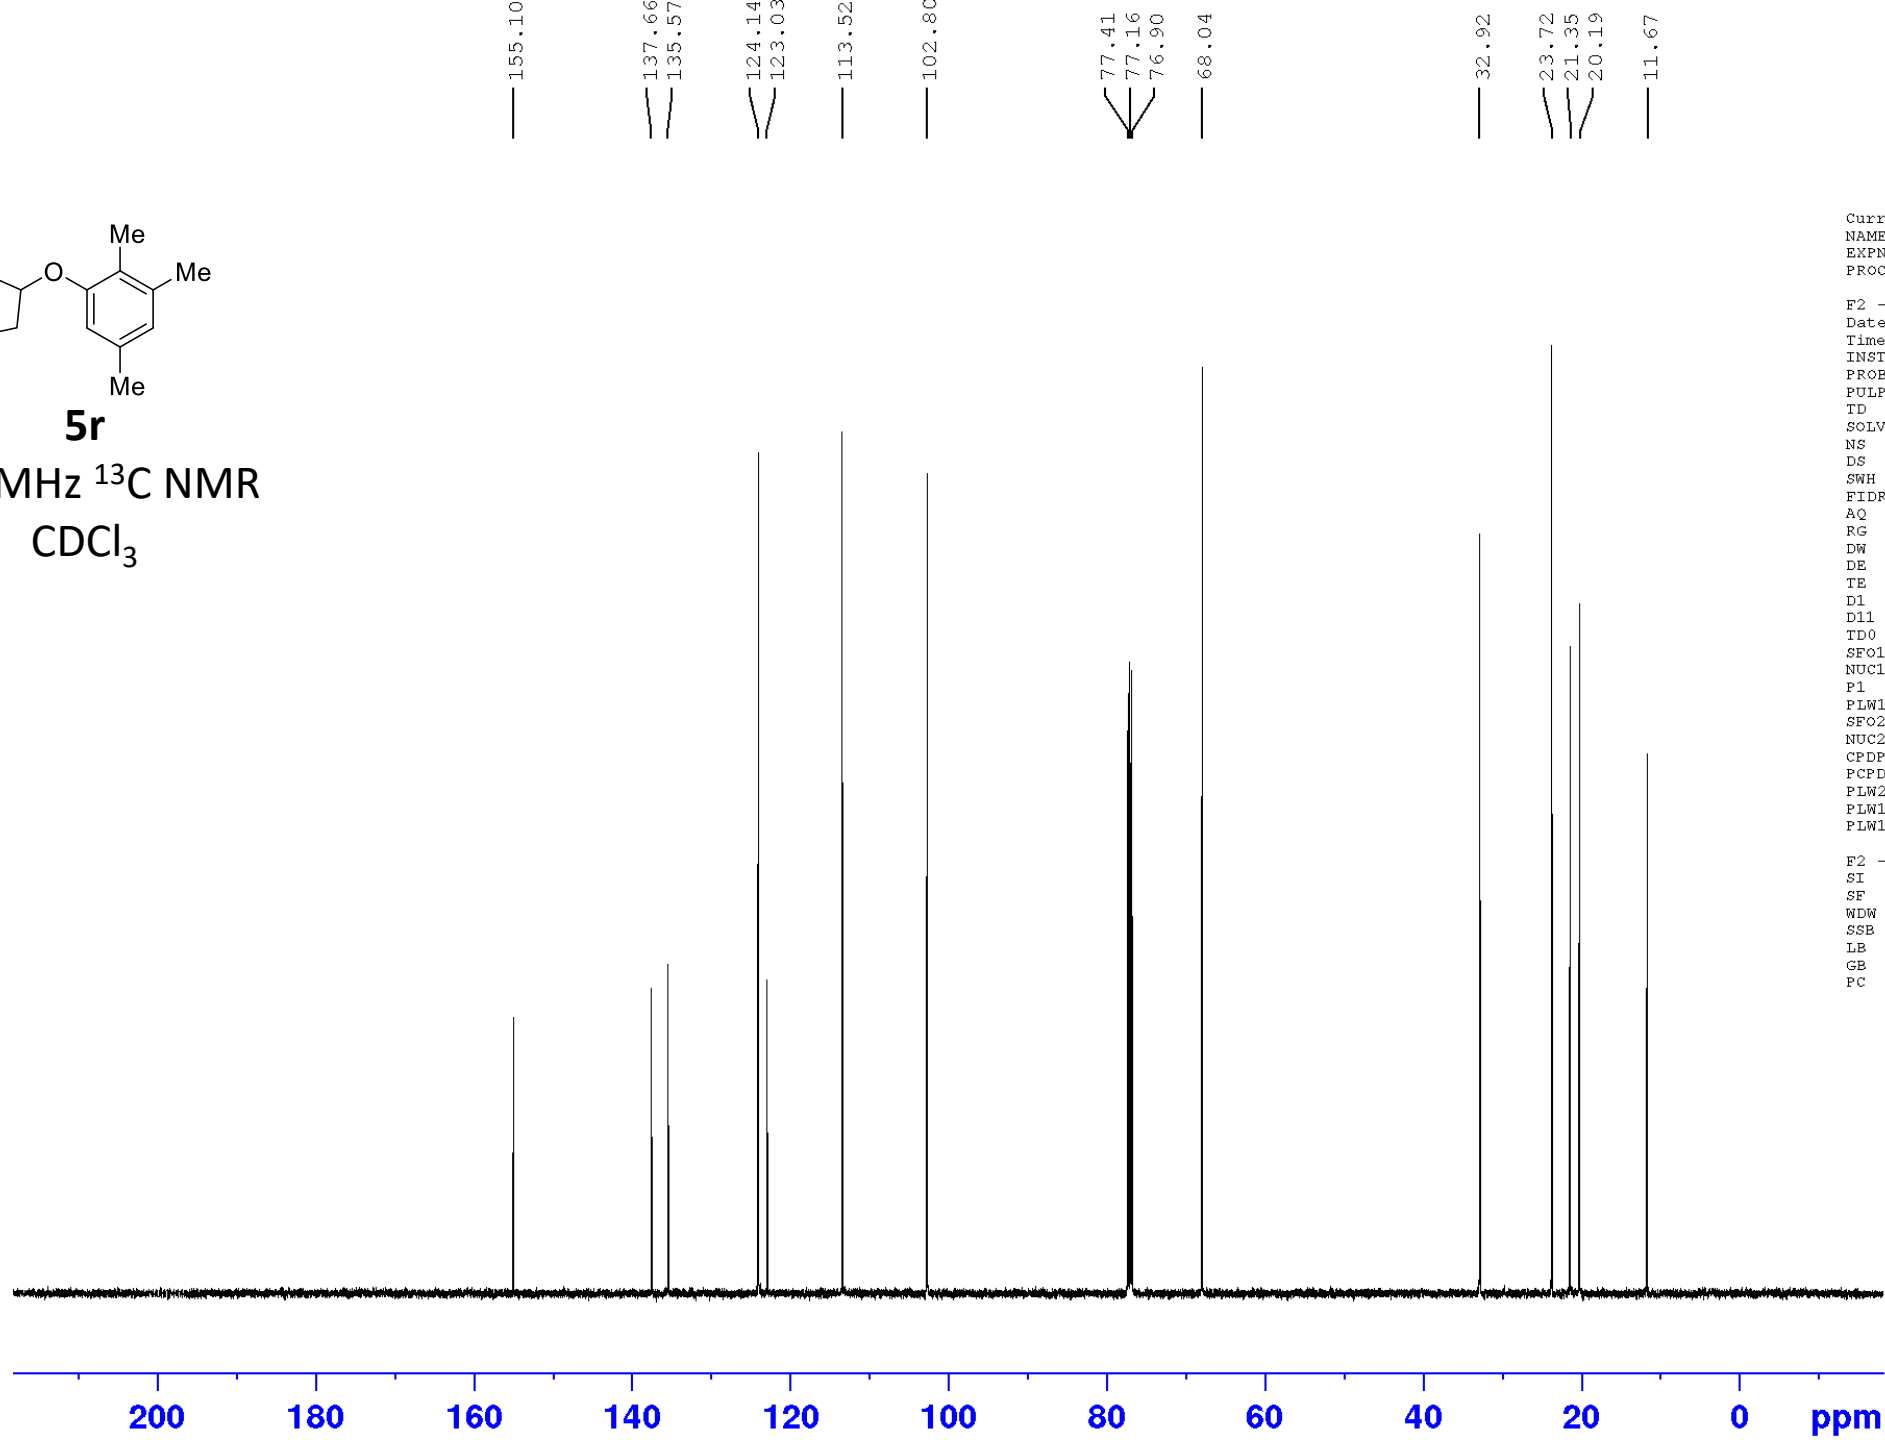

Current Data Parameters  
 NAME vinn-4-147-8-isl-20200120  
 EXPNO 2  
 PROCNO 1

F2 - Acquisition Parameters  
 Date\_ 20210121  
 Time 7.36 h  
 INSTRUM spect  
 PROBHD Z119470\_0283 (  
 PULPROG zgpg30  
 TD 65536  
 SOLVENT CDCl3  
 NS 256  
 DS 4  
 SWH 29761.904 Hz  
 FIDRES 0.908261 Hz  
 AQ 1.1010048 sec  
 RG 206.72  
 DW 16.800 usec  
 DE 6.50 usec  
 TE 295.2 K  
 D1 2.0000000 sec  
 D11 0.0300000 sec  
 TD0 1  
 SFO1 125.7703643 MHz  
 NUC1 13C  
 P1 9.75 usec  
 PLW1 94.0000000 W  
 SFO2 500.1320005 MHz  
 NUC2 1H  
 CPDPRG[2] waltz16  
 PCPD2 80.00 usec  
 PLW2 25.0000000 W  
 PLW12 0.46495000 W  
 PLW13 0.23387000 W

F2 - Processing parameters  
 SI 32768  
 SF 125.7577807 MHz  
 WDW EM  
 SSB 0  
 LB 1.00 Hz  
 GB 0  
 PC 1.40

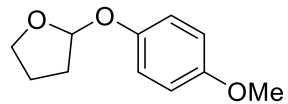

**5s**  
500 MHz <sup>1</sup>H NMR  
CDCl<sub>3</sub>

6.9796  
6.9615  
6.8283  
6.8101  
5.7022  
5.7004  
5.6926  
4.0738  
4.0307  
3.9622  
3.9194  
3.7643  
2.1832  
2.0516  
1.9682  
1.9027

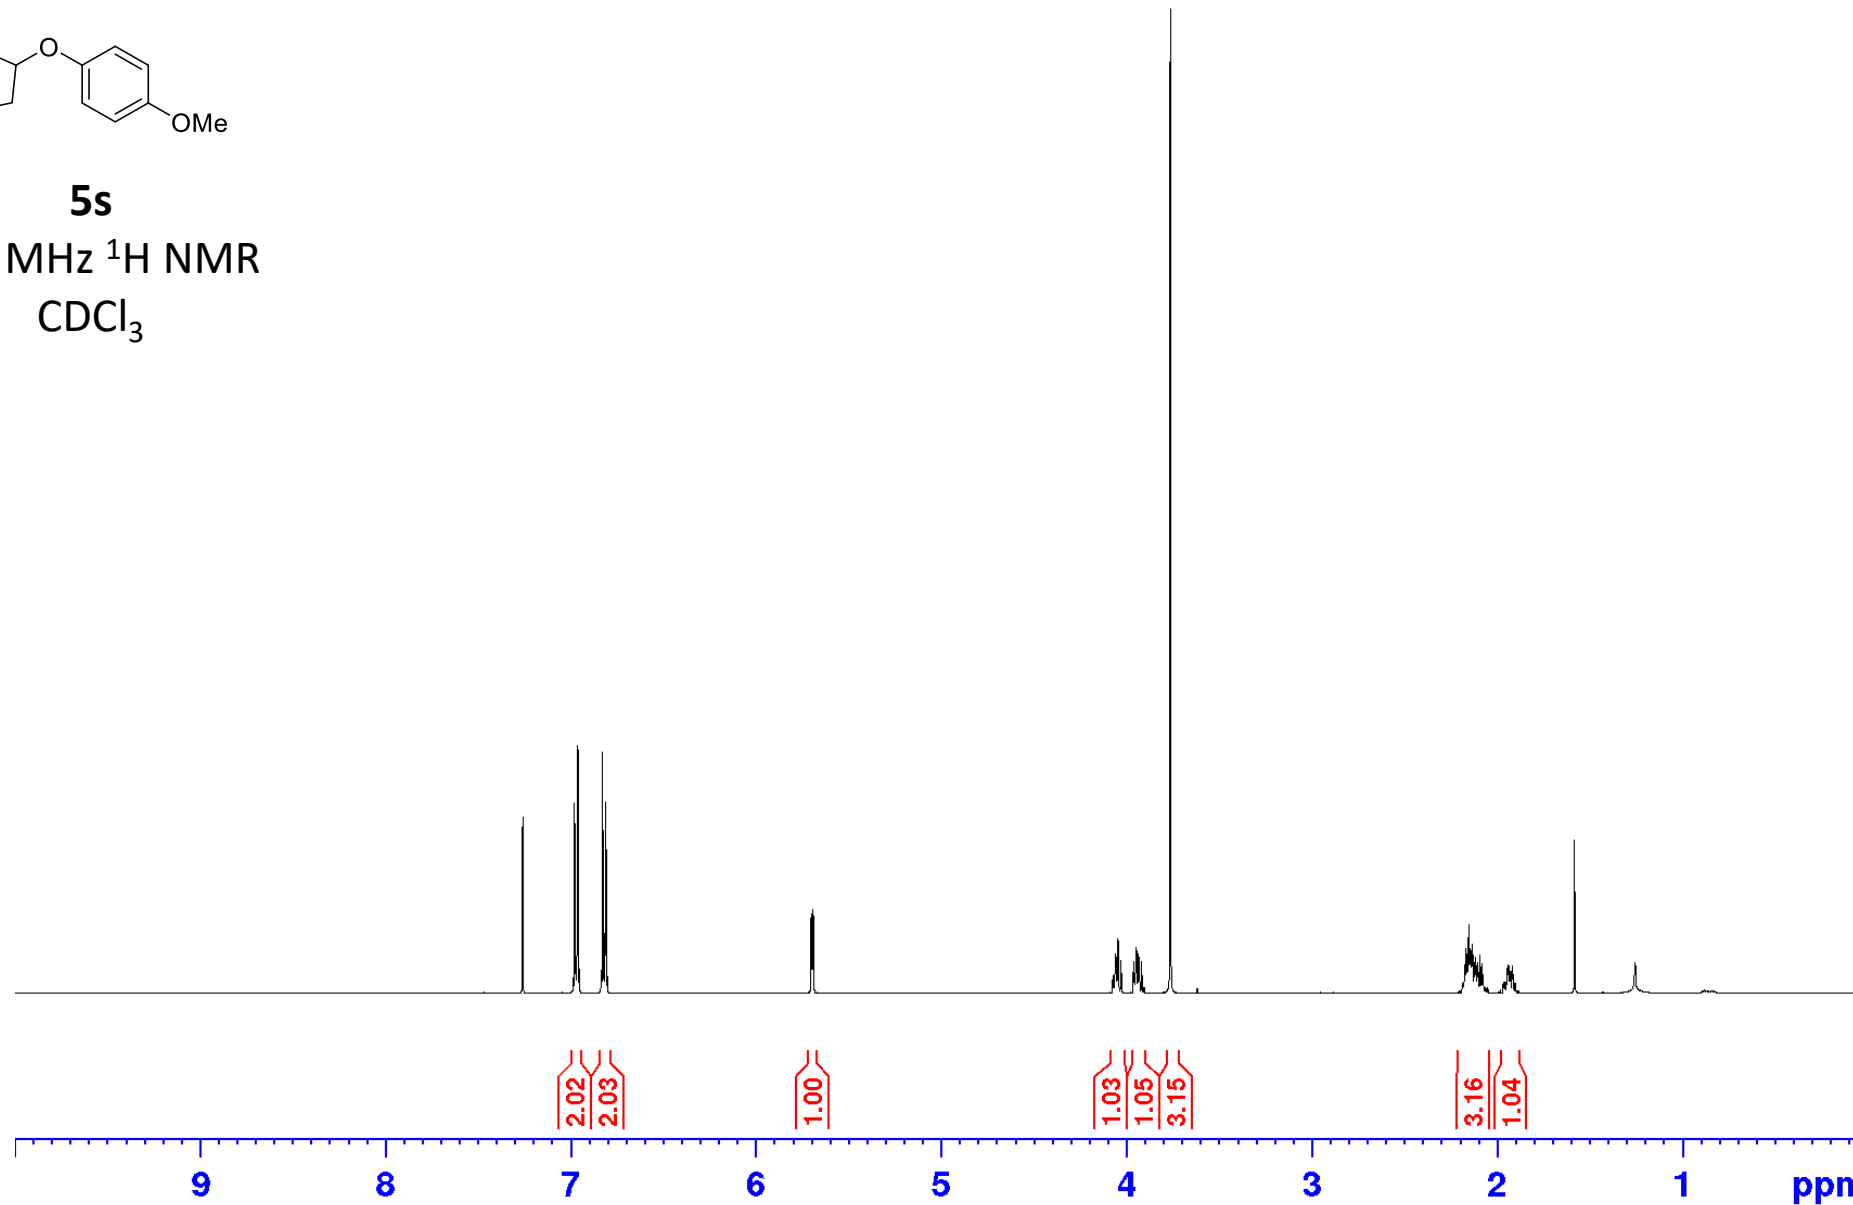

Current Data Parameters  
NAME vinn-4-147-4-isl-20200120  
EXPNO 1  
PROCNO 1

F2 - Acquisition Parameters  
Date\_ 20210121  
Time 5.27 h  
INSTRUM spect  
PROBHD z119470\_0283 {  
PULPROG zg30  
TD 65536  
SOLVENT cdcl3  
NS 16  
DS 2  
SWH 10000.000 Hz  
FIDRES 0.305176 Hz  
AQ 3.2767999 sec  
RG 102.6  
DW 50.000 usec  
DE 6.50 usec  
TE 295.1 K  
D1 1.00000000 sec  
TD0 1  
SFO1 500.1330883 MHz  
NUC1 1H  
P1 10.91 usec  
PLW1 25.00000000 W

F2 - Processing parameters  
SI 65536  
SF 500.1300123 MHz  
WDW EM  
SSB 0  
LB 0.30 Hz  
GB 0  
PC 1.00

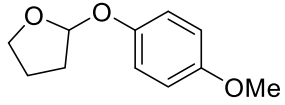

**5s**

125 MHz  $^{13}\text{C}$  NMR  
 $\text{CDCl}_3$

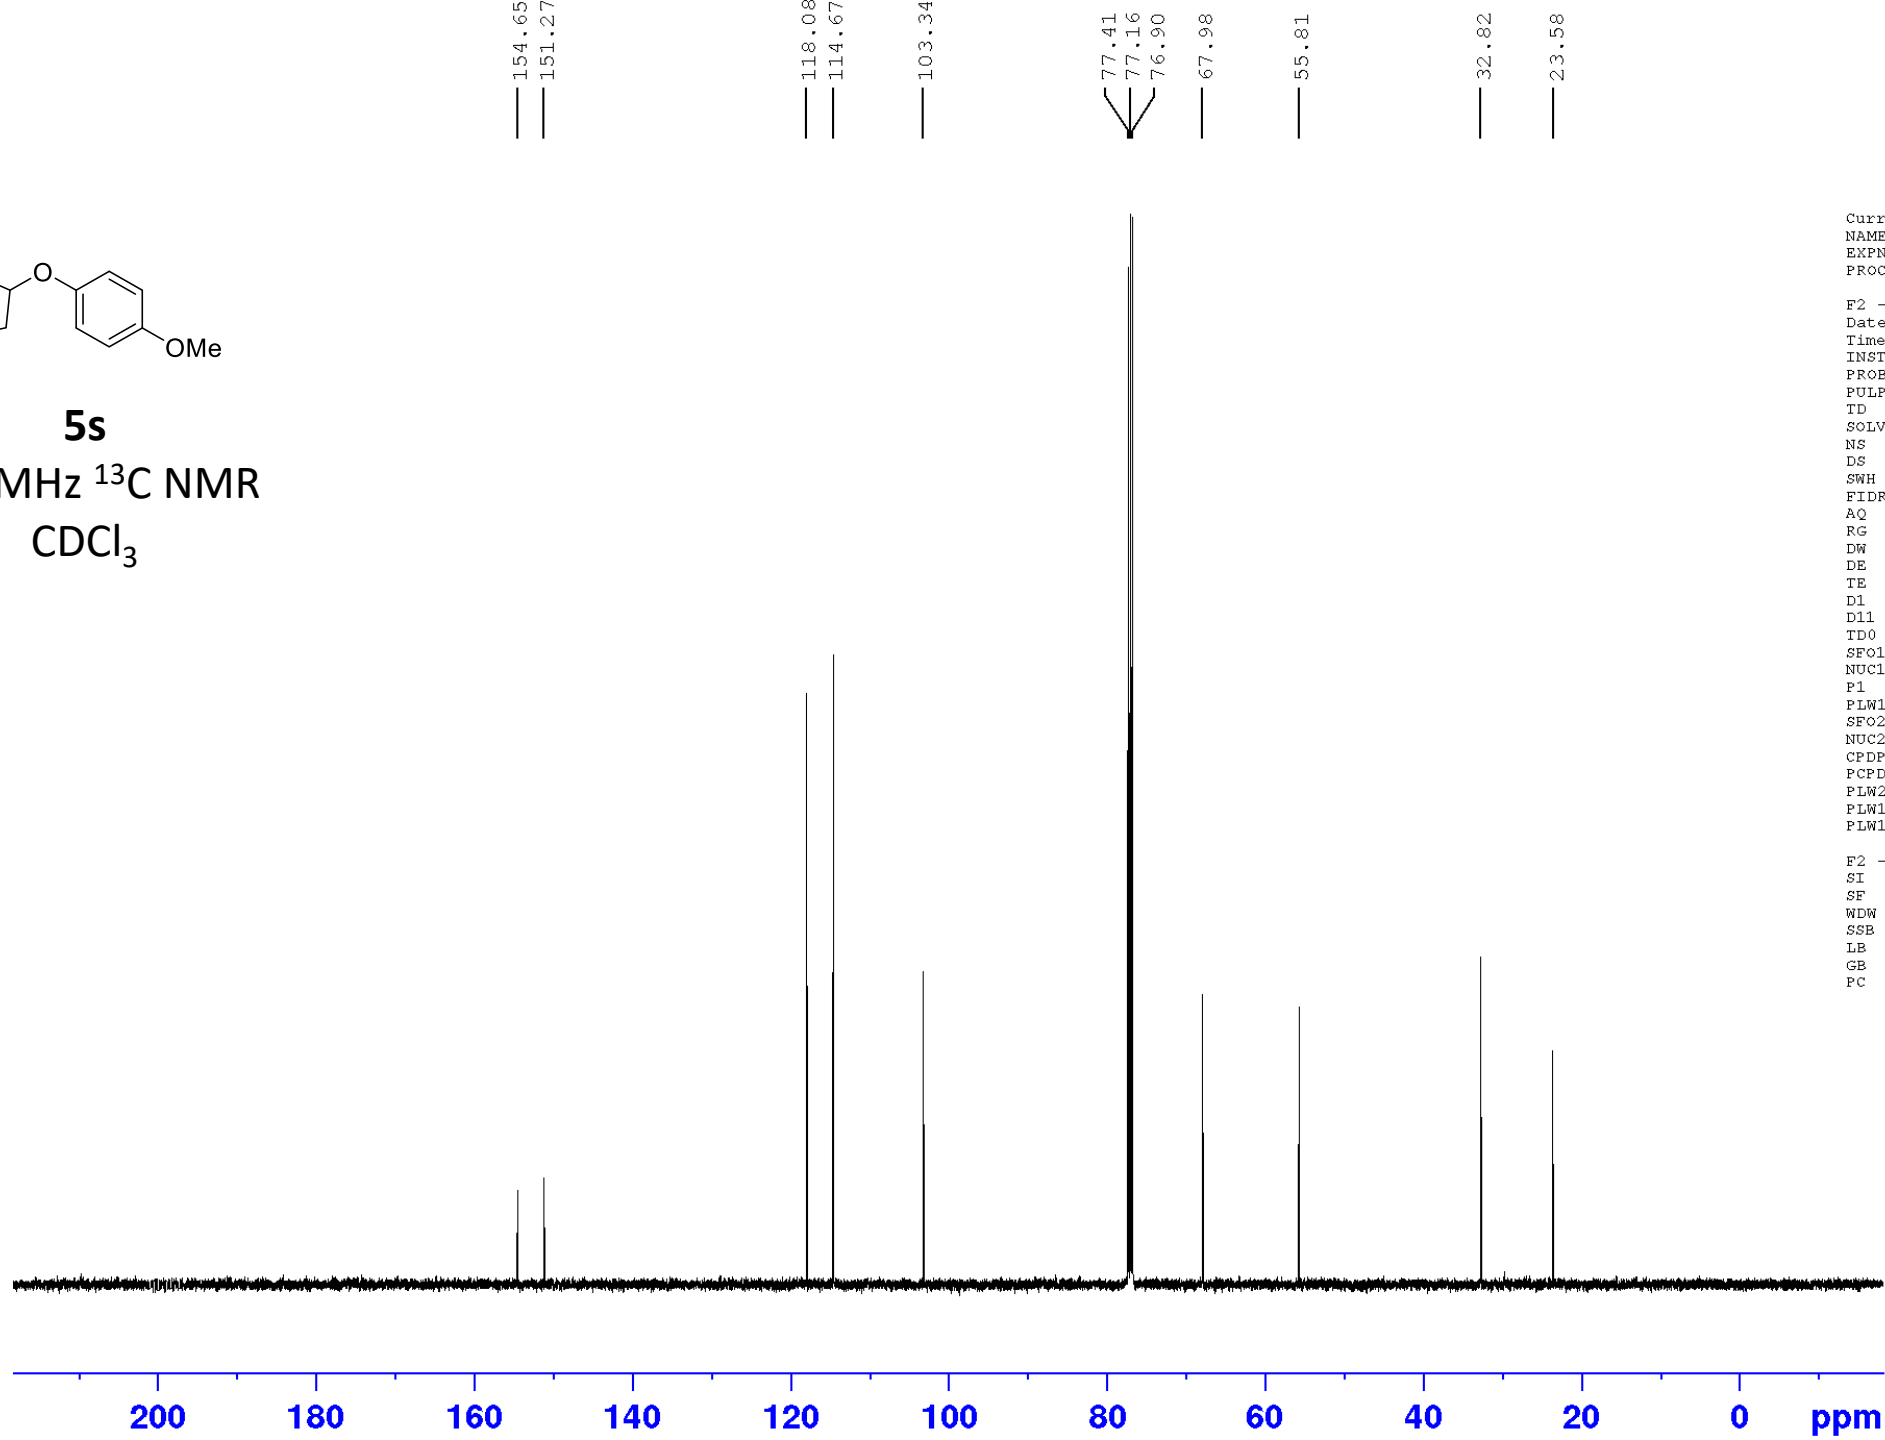

Current Data Parameters  
NAME vinn-4-147-4-islit-20200120  
EXPNO 2  
PROCNO 1

F2 - Acquisition Parameters  
Date\_ 20210121  
Time 5.41 h  
INSTRUM spect  
PROBHD Z119470\_0283 (  
PULPROG zgpg30  
TD 65536  
SOLVENT CDCl3  
NS 256  
DS 4  
SWH 29761.904 Hz  
FIDRES 0.908261 Hz  
AQ 1.1010048 sec  
RG 206.72  
DW 16.800 usec  
DE 6.50 usec  
TE 295.1 K  
D1 2.0000000 sec  
D11 0.0300000 sec  
TD0 1  
SFO1 125.7703643 MHz  
NUC1 13C  
P1 9.75 usec  
PLW1 94.0000000 W  
SFO2 500.1320005 MHz  
NUC2 1H  
CPDPRG[2] waltz16  
PCPD2 80.00 usec  
PLW2 25.0000000 W  
PLW12 0.46495000 W  
PLW13 0.23387000 W

F2 - Processing parameters  
SI 32768  
SF 125.7577736 MHz  
WDW EM  
SSB 0  
LB 1.00 Hz  
GB 0  
PC 1.40

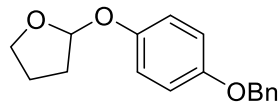

**5t**  
500 MHz <sup>1</sup>H NMR  
CDCl<sub>3</sub>

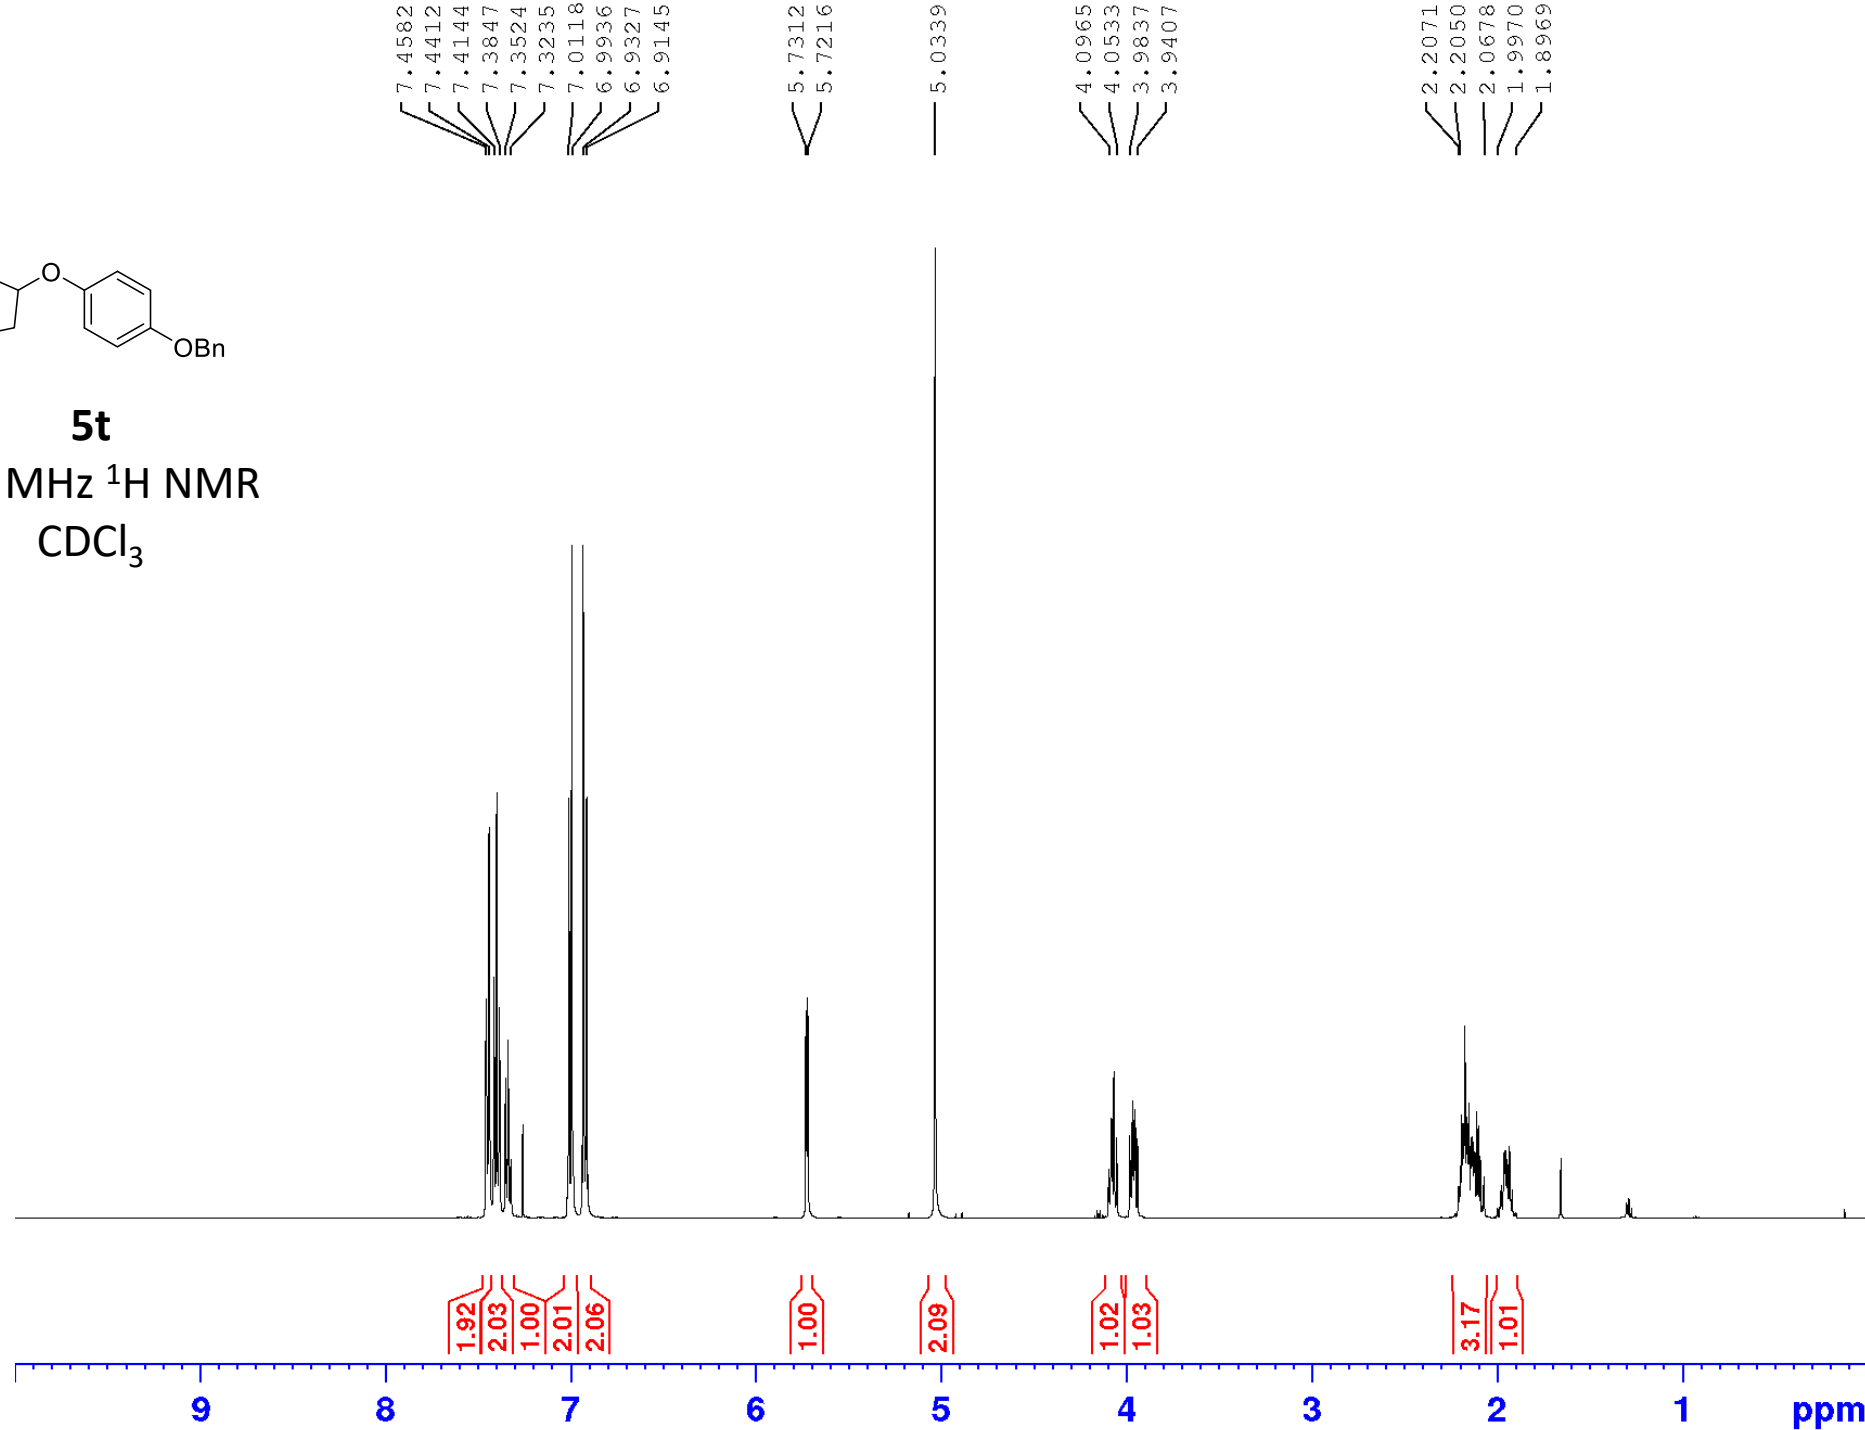

Current Data Parameters  
NAME vinn-4-147-5-isl-20200120  
EXPNO 1  
PROCNO 1

F2 - Acquisition Parameters  
Date\_ 20210121  
Time 5.45 h  
INSTRUM spect  
PROBHD z119470\_0283 {  
PULPROG zg30  
TD 65536  
SOLVENT cdcl3  
NS 16  
DS 2  
SWH 10000.000 Hz  
FIDRES 0.305176 Hz  
AQ 3.2767999 sec  
RG 30.85  
DW 50.000 usec  
DE 6.50 usec  
TE 295.2 K  
D1 1.00000000 sec  
TD0 1  
SFO1 500.1330883 MHz  
NUC1 1H  
P1 10.91 usec  
PLW1 25.00000000 W

F2 - Processing parameters  
SI 65536  
SF 500.1300121 MHz  
WDW EM  
SSB 0  
LB 0.30 Hz  
GB 0  
PC 1.00

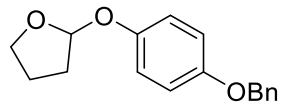

**5t**  
 125 MHz <sup>13</sup>C NMR  
 CDCl<sub>3</sub>

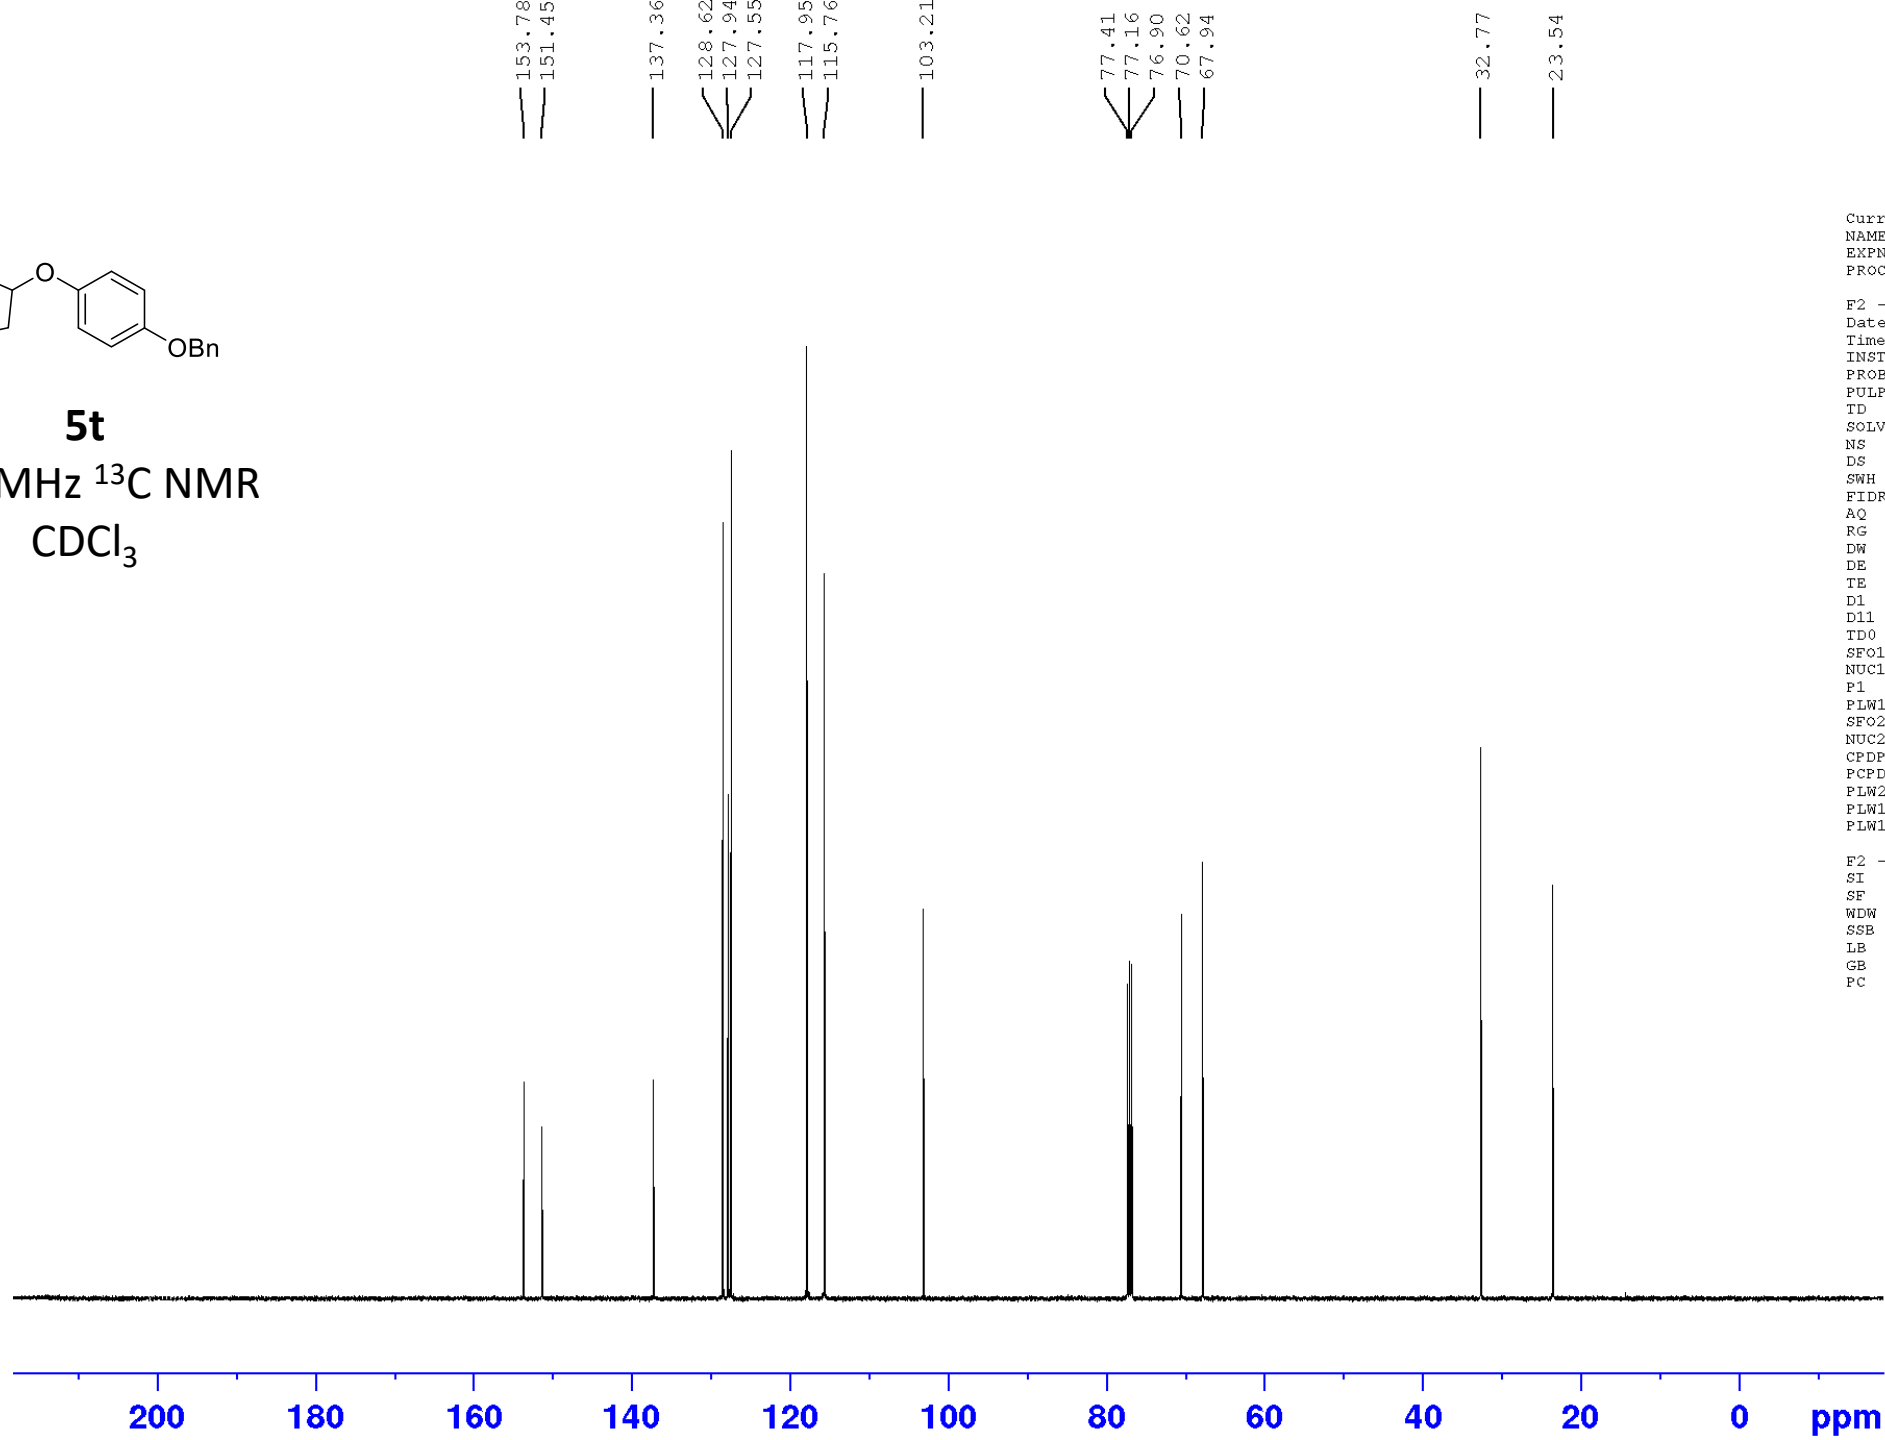

Current Data Parameters  
 NAME vinn-4-147-5-islit-20200120  
 EXPNO 2  
 PROCNO 1

F2 - Acquisition Parameters  
 Date\_ 20210121  
 Time 5.59 h  
 INSTRUM spect  
 PROBHD Z119470\_0283 ( )  
 PULPROG zgpg30  
 TD 65536  
 SOLVENT CDCl3  
 NS 256  
 DS 4  
 SWH 29761.904 Hz  
 FIDRES 0.908261 Hz  
 AQ 1.1010048 sec  
 RG 206.72  
 DW 16.800 usec  
 DE 6.50 usec  
 TE 295.2 K  
 D1 2.0000000 sec  
 D11 0.0300000 sec  
 TD0 1  
 SFO1 125.7703643 MHz  
 NUC1 13C  
 P1 9.75 usec  
 PLW1 94.0000000 W  
 SFO2 500.1320005 MHz  
 NUC2 1H  
 CPDPRG2 waltz16  
 PCPD2 80.00 usec  
 PLW2 25.0000000 W  
 PLW12 0.46495000 W  
 PLW13 0.23387000 W

F2 - Processing parameters  
 SI 32768  
 SF 125.7577846 MHz  
 WDW EM  
 SSB 0  
 LB 1.00 Hz  
 GB 0  
 PC 1.40

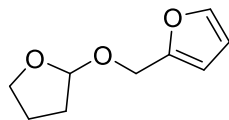

**5u**

500 MHz <sup>1</sup>H NMR  
CDCl<sub>3</sub>

7.402  
7.260  
6.328  
6.318  
5.216  
5.210  
5.204  
4.617  
4.591  
4.468  
4.443  
3.961  
3.946  
3.931  
3.916  
3.901  
3.888  
3.872  
2.054  
1.973  
1.947  
1.912  
1.868  
1.791

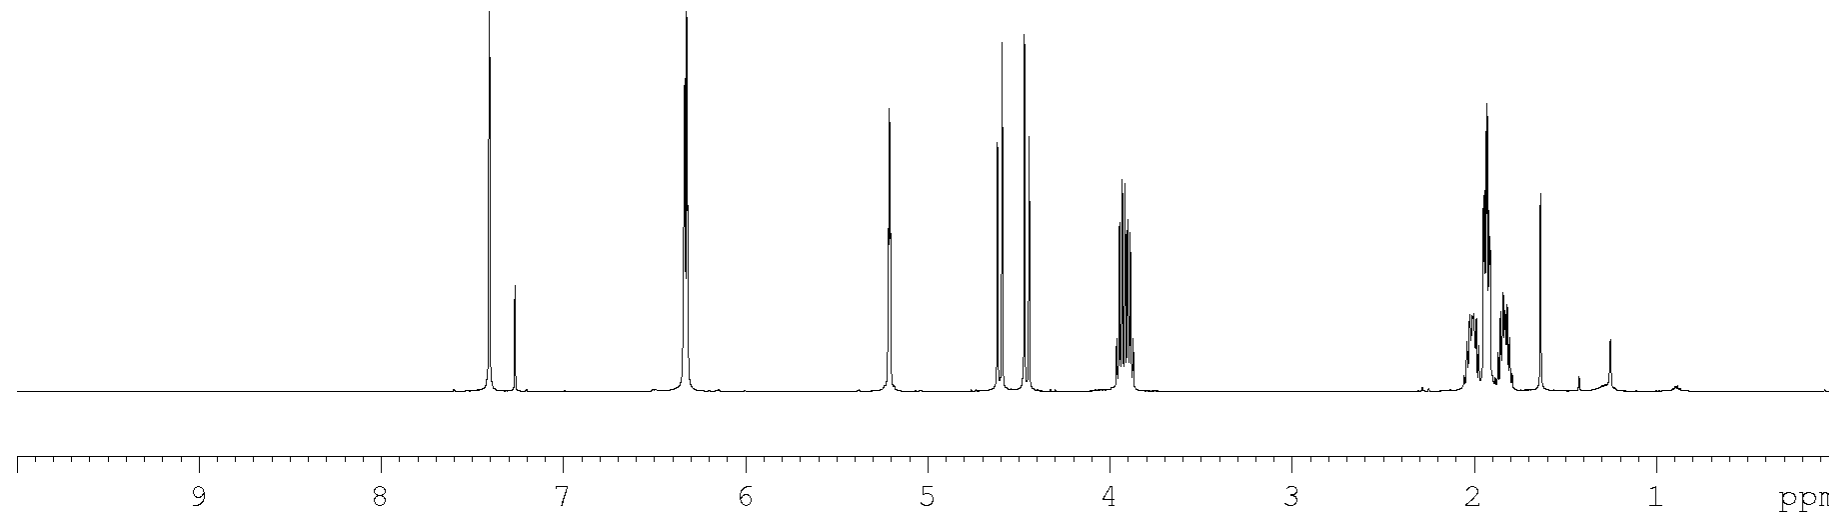

1.00  
2.07  
1.06  
1.12  
1.11  
2.24  
1.19  
2.22  
1.15

```

Current Data Parameters
NAME      vinn-7-105-2-ialt-20230807
EXPNO     1
PROCNO    1

F2 - Acquisition Parameters
Date_     20230807
Time      17.51 h
INSTRUM   spect
PROBHD    zg30
PULPROG   zg30
TD         65536
SOLVENT   CDCl3
NS         16
DS         2
SWH        10000.000 Hz
FIDRES     0.305176 Hz
AQ         3.2767999 sec
RG         30.85
DW         50.000 usec
DE         10.000 usec
TE         296.1 K
D1         1.00000000 sec
TD0        1
SFO1      500.1330883 MHz
NUC1       1H
P1         11.25 usec
PLW1      17.35199928 W

F2 - Processing parameters
SI         65536
SF         500.1300134 MHz
WDW        EM
SSB        0
LB         0.30 Hz
GB         0
PC         1.00

```

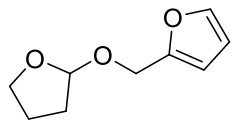

**5u**

125 MHz <sup>13</sup>C NMR  
CDCl<sub>3</sub>

— 151.870  
— 142.908  
  
 < 110.370  
 < 109.288  
 — 102.841  
  
 < 77.410  
 < 77.156  
 < 76.903  
 — 67.224  
 — 60.684  
  
 — 32.397  
 — 23.509

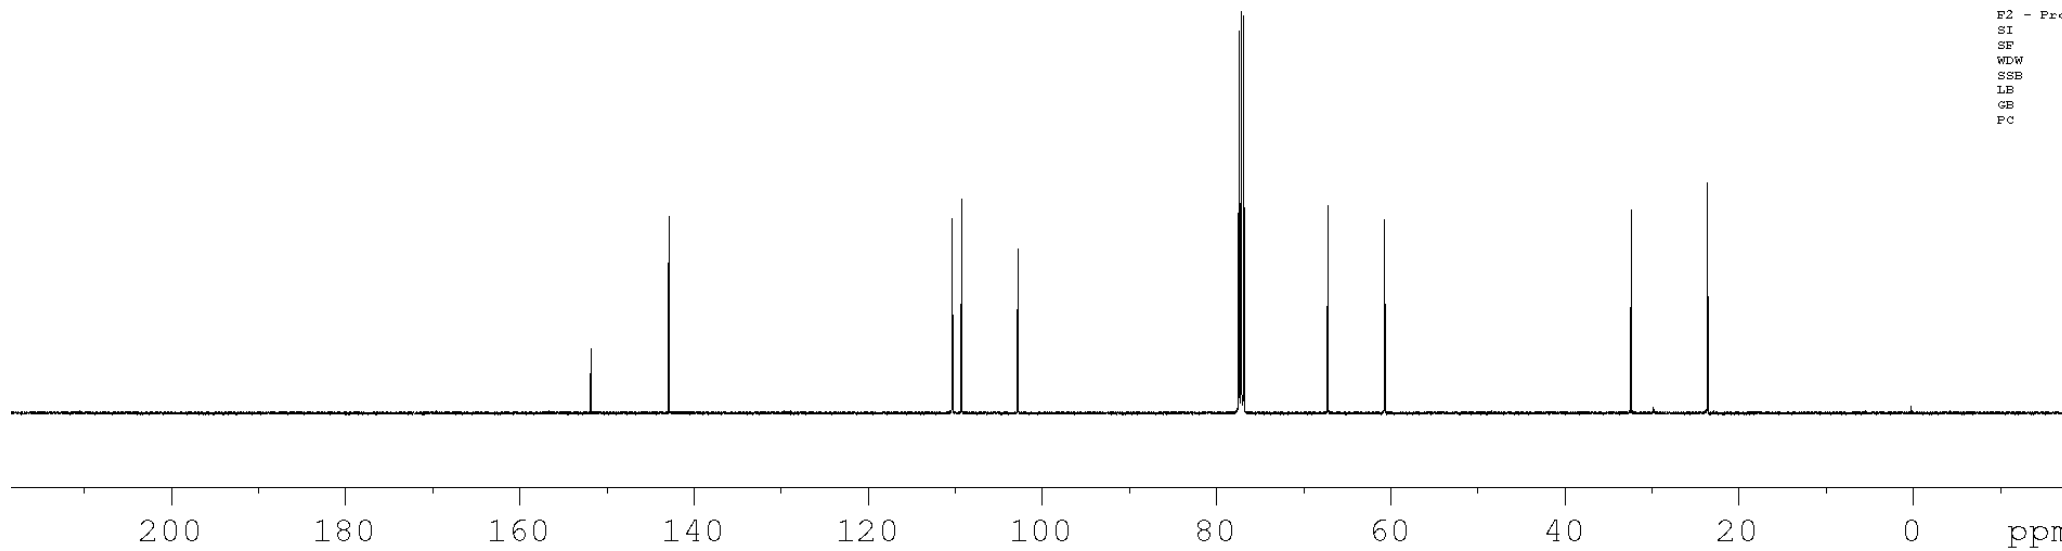

Current Data Parameters  
 NAME vinn-7-105-2-ialt-20230807  
 EKFNO 2  
 PROCNO 1

F2 - Acquisition Parameters  
 Date\_ 20230807  
 Time 18.02 h  
 INSTRUM spect  
 PROBHD Z149001\_0010 {  
 PULPROG zgpg30  
 TD 65536  
 SOLVENT cdcl3  
 NS 200  
 DS 4  
 SWH 29761.904 Hz  
 FIDRES 0.908261 Hz  
 AQ 1.1010048 sec  
 RG 206.72  
 DW 16.800 usec  
 DE 18.00 usec  
 TE 296.2 K  
 D1 2.00000000 sec  
 D11 0.03000000 sec  
 TD0 1  
 SFO1 125.7703643 MHz  
 NUC1 13C  
 F1 10.00 usec  
 PLW1 61.00000000 W  
 SFO2 500.1320005 MHz  
 NUC2 1H  
 CPDPRG[2] waltz16  
 PCPD2 80.00 usec  
 PLW2 17.35199928 W  
 PLW12 0.34314999 W  
 PLW13 0.17260000 W

F2 - Processing parameters  
 SI 32768  
 SF 125.7577745 MHz  
 WDW EM  
 SSB 0  
 LB 1.00 Hz  
 GB 0  
 PC 1.40

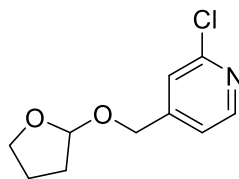

**5v**

400 MHz <sup>1</sup>H NMR  
CDCl<sub>3</sub>

8.329  
8.324  
7.626  
7.621  
7.606  
7.600  
7.290  
7.269

5.191  
5.184  
5.177  
4.689  
4.658  
4.465  
4.434  
3.902  
3.886  
3.868

2.053  
1.799

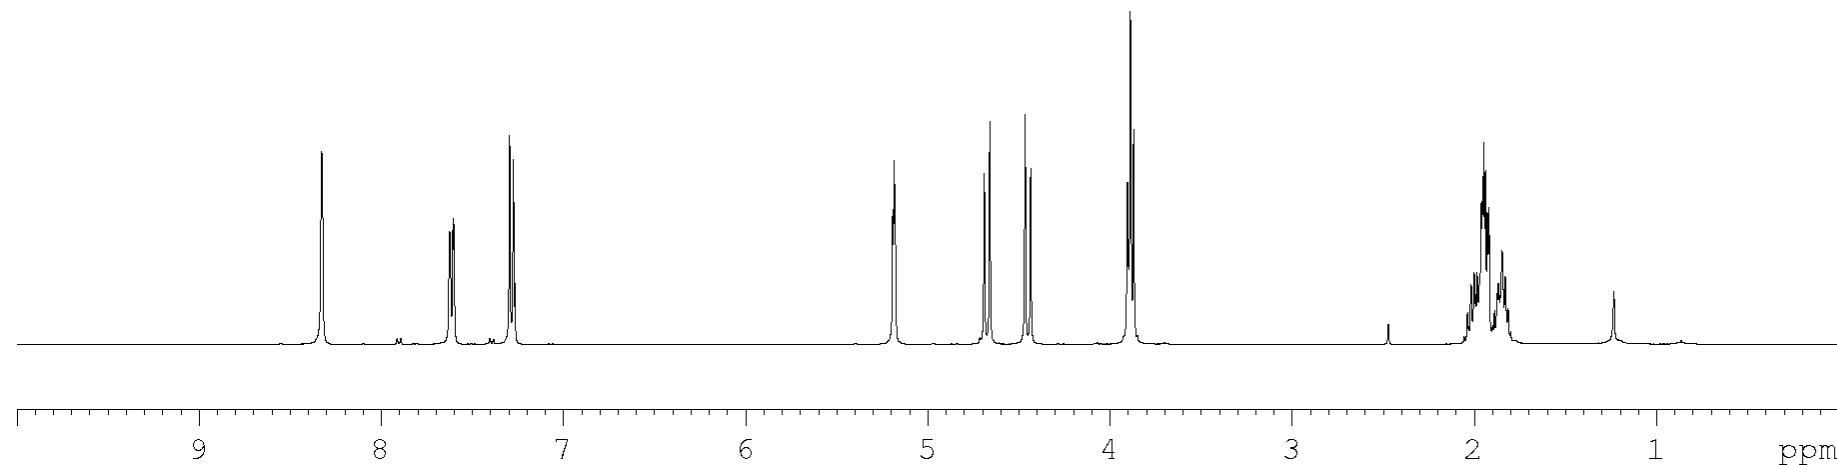

1.00

1.02

1.10

1.01

1.07

1.07

2.11

4.53

```

Current Data Parameters
NAME      vinn-7-110-2-ialt-20230809
EXPNO     1
PROCNO    1

F2 - Acquisition Parameters
Date_     20230809
Time      18.00 h
INSTRUM   spect
PROBHD    zg30
PULPROG   zg30
TD         65536
SOLVENT   CDCl3
NS         16
DS         2
SWH        8012.820 Hz
FIDRES     0.244532 Hz
AQ         4.0894465 sec
RG          90.5
DW         62.400 usec
DE         6.50 usec
TE         295.9 K
D1         1.00000000 sec
D10        1
SFO1      400.1324708 MHz
NUC1       1H
P1         15.00 usec
PLW1      12.50000000 W

F2 - Processing parameters
SI         65536
SF         400.1300096 MHz
WDW        EM
SSB        0
LB         0.30 Hz
GB         0
PC         1.00
  
```



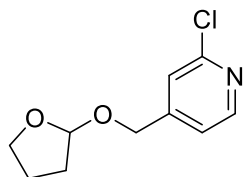

**5v**

100 MHz <sup>13</sup>C NMR  
CDCl<sub>3</sub>

150.613  
149.086  
138.429  
133.073  
124.067  
103.606  
77.476  
77.157  
76.840  
67.352  
65.535  
32.468  
23.482

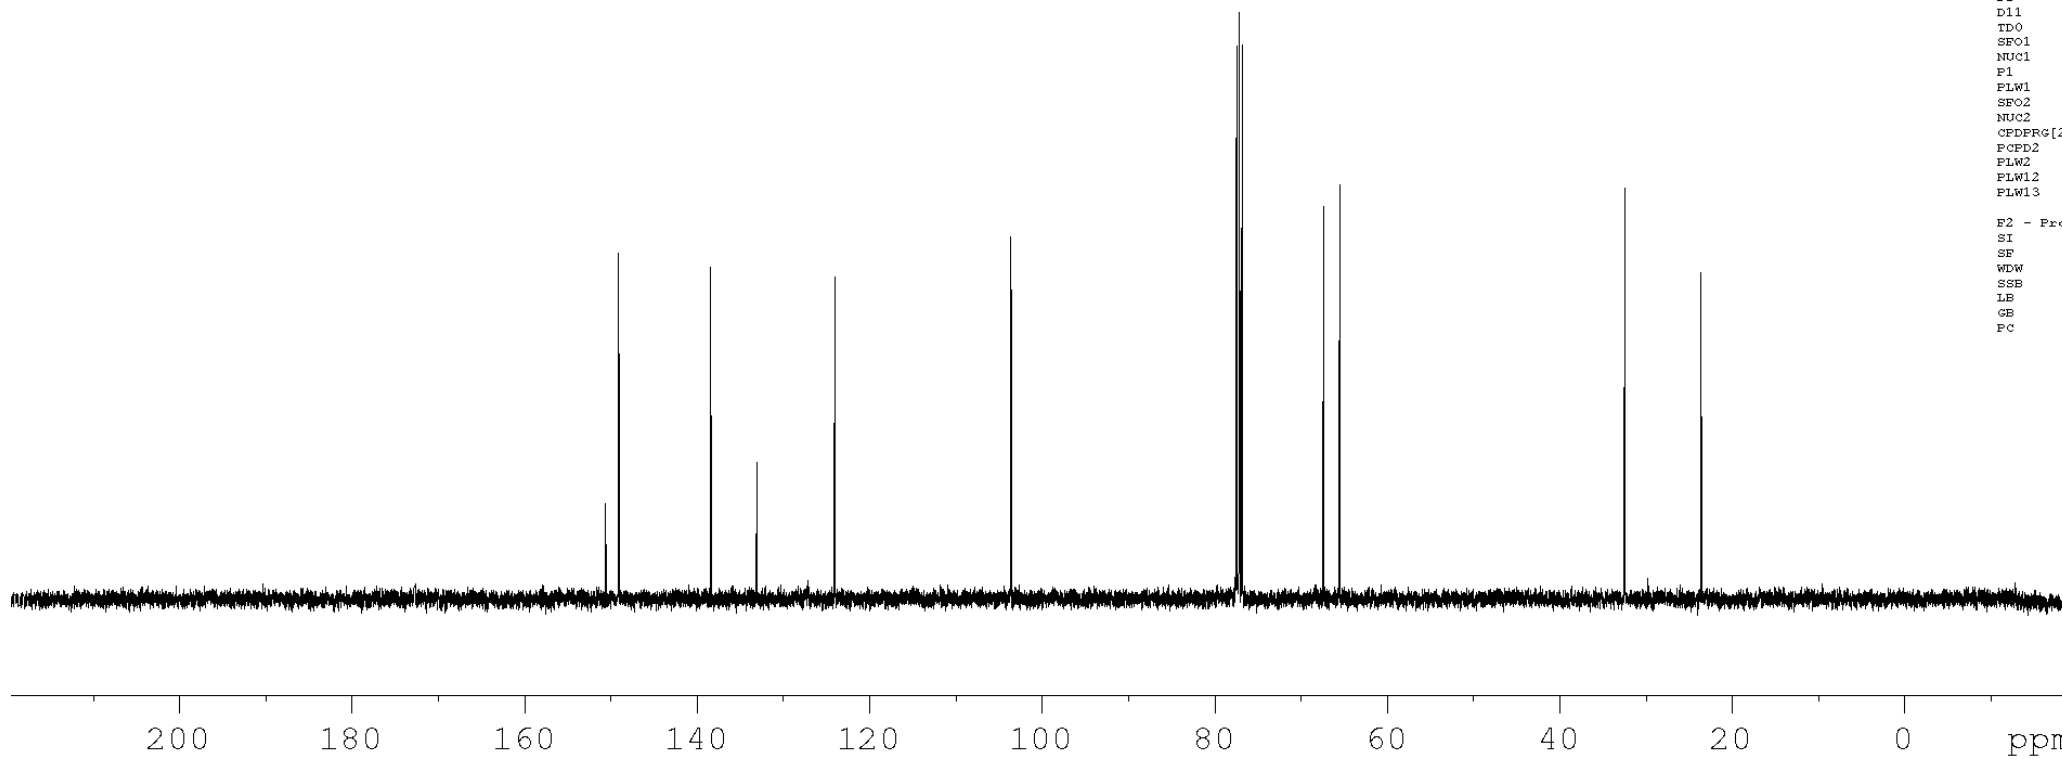

Current Data Parameters  
NAME vinn-7-110-2-ialt-20230809  
EKFNO 2  
PROCNO 1

F2 - Acquisition Parameters  
Date\_ 20230809  
Time 18.04 h  
INSTRUM spect  
PROBHD z108618\_0257 {  
PULPROG zgpg30  
TD 65536  
SOLVENT cdcl3  
NS 45  
DS 4  
SWH 24038.461 Hz  
FIDRES 0.733596 Hz  
AQ 1.3631488 sec  
RG 203  
DW 20.800 usec  
DE 6.50 usec  
TE 296.2 K  
D1 2.00000000 sec  
D11 0.03000000 sec  
TD0 1  
SFO1 100.6228298 MHz  
NUC1 13c  
F1 10.00 usec  
PLW1 51.00000000 W  
SFO2 400.1316005 MHz  
NUC2 1H  
CPDPRG[2] waltz16  
PCPD2 90.00 usec  
PLW2 12.50000000 W  
PLW12 0.34722000 W  
PLW13 0.17465000 W

F2 - Processing parameters  
SI 32768  
SF 100.6127594 MHz  
WDW EM  
SSB 0  
LB 1.00 Hz  
GB 0  
PC 1.40

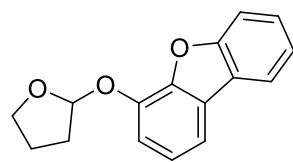

**5w**

400 MHz <sup>1</sup>H NMR  
CDCl<sub>3</sub>

7.943  
7.924  
7.633  
7.585  
7.474  
7.453  
7.435  
7.357  
7.339  
7.321  
7.276  
7.270  
7.260  
6.107  
6.095

4.200  
4.180  
4.165  
4.145  
4.052  
4.033  
4.017  
3.997

2.489  
2.396  
2.352  
2.188  
2.082  
1.955

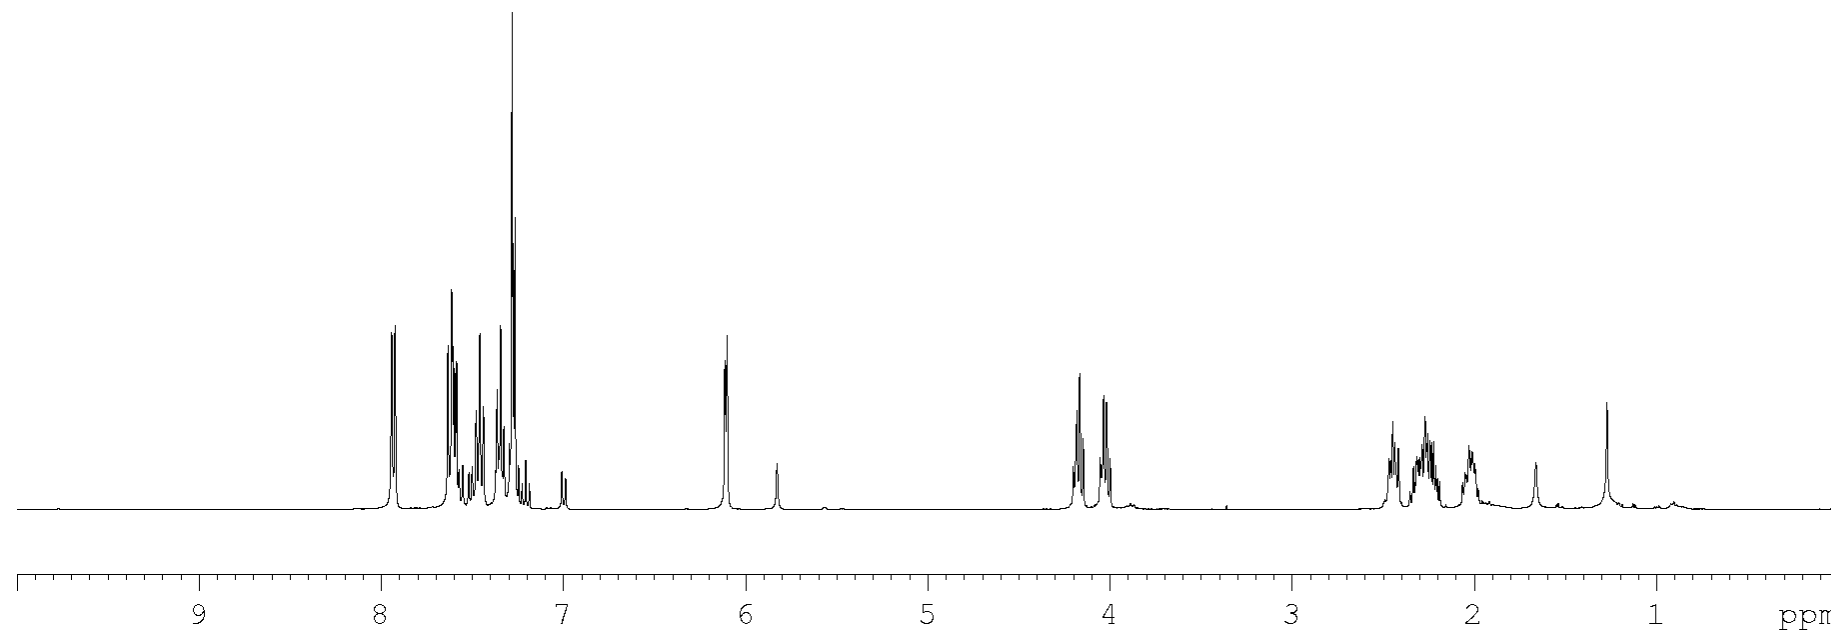

1.20  
2.10  
1.23  
1.23  
2.08

1.00

1.05  
1.06

1.06  
2.12  
1.14

```

Current Data Parameters
NAME      vinn-7-110-4-ialt-20230809
EXPNO    1
PROCNO    1

F2 - Acquisition Parameters
Date_     20230809
Time      18.09 h
INSTRUM   spect
PROBHD    zg30
PULPROG   zg30
TD         65536
SOLVENT   CDCl3
NS         16
DS         2
SWH        8012.820 Hz
FIDRES     0.244532 Hz
AQ         4.0894465 sec
RG         90.5
DW         62.400 usec
DE         6.50 usec
TE         296.1 K
D1         1.00000000 sec
TD0        1
SFO1      400.1324708 MHz
NUC1       1H
P1         15.00 usec
PLW1      12.50000000 W

F2 - Processing parameters
SI         65536
SF         400.1300099 MHz
WDW        EM
SSB        0
LB         0.30 Hz
GB         0
PC         1.00

```

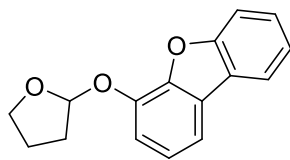

**5w**

100 MHz <sup>13</sup>C NMR  
CDCl<sub>3</sub>

— 156.226  
 / 146.165  
 / 142.836  
 / 127.204  
 / 126.098  
 / 124.561  
 / 123.501  
 / 122.850  
 / 120.845  
 / 114.617  
 / 113.958  
 / 112.028  
 / 103.624  
 / 77.469  
 / 77.151  
 / 76.834  
 / 68.483  
 — 32.940  
 — 23.489

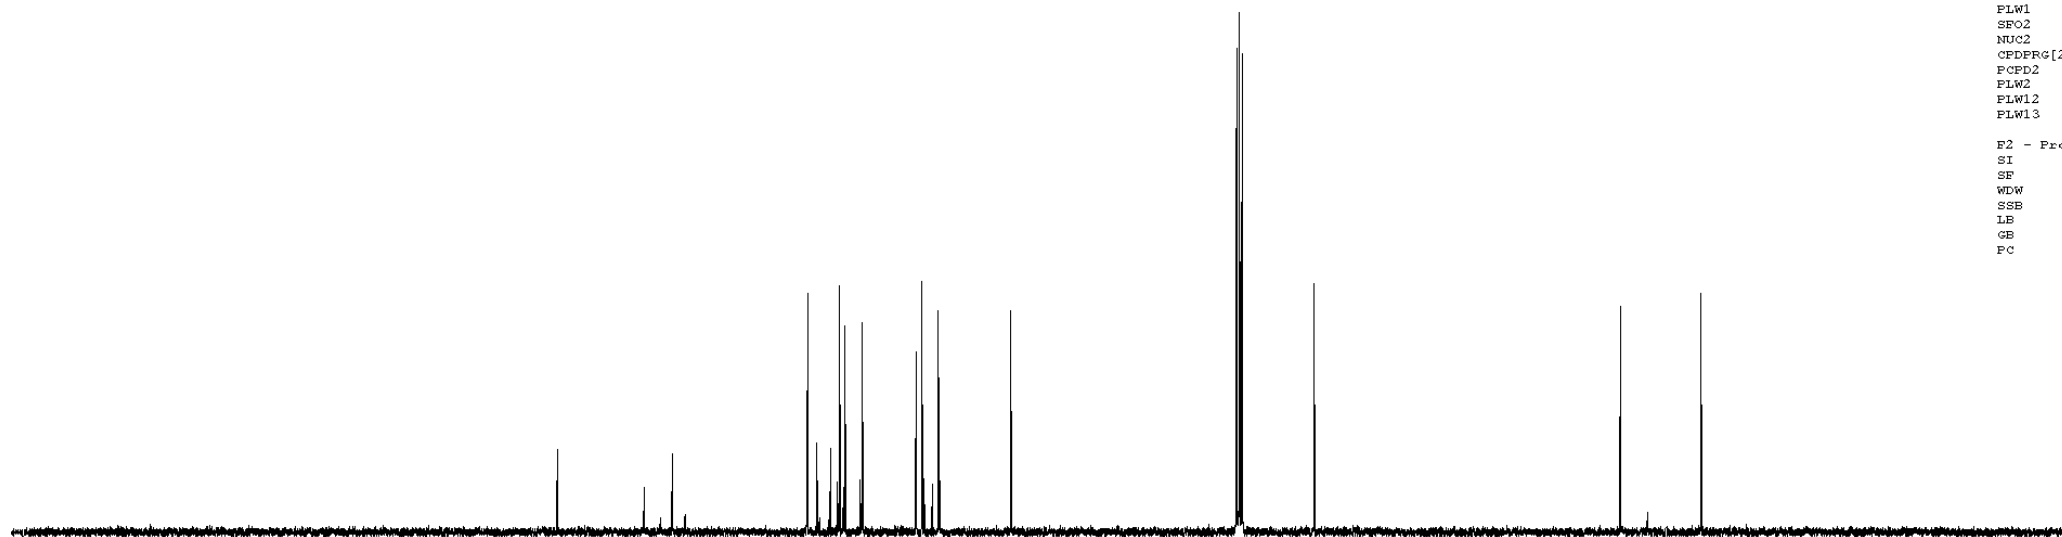

Current Data Parameters  
 NAME vinn-7-110-4-ialt-20230809  
 EKFNO 2  
 PROCNO 1

F2 - Acquisition Parameters  
 Date\_ 20230809  
 Time 18.21 h  
 INSTRUM spect  
 PROBHD z108618\_0257 {  
 PULPROG zgpg30  
 TD 65536  
 SOLVENT cdcl3  
 NS 176  
 DS 4  
 SWH 24038.461 Hz  
 FIDRES 0.733596 Hz  
 AQ 1.3631488 sec  
 RG 203  
 DW 20.800 usec  
 DE 6.50 usec  
 TE 296.3 K  
 D1 2.00000000 sec  
 D11 0.03000000 sec  
 TD0 1  
 SFO1 100.6228298 MHz  
 NUC1 13c  
 F1 10.00 usec  
 PLW1 51.00000000 W  
 SFO2 400.1316005 MHz  
 NUC2 1H  
 CPDPRG[2] waltz16  
 PCPD2 90.00 usec  
 PLW2 12.50000000 W  
 PLW12 0.34722000 W  
 PLW13 0.17465000 W

F2 - Processing parameters  
 SI 32768  
 SF 100.6127599 MHz  
 WDW EM  
 SSB 0  
 LB 1.00 Hz  
 GB 0  
 PC 1.40

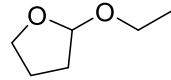

5x  
500 MHz <sup>1</sup>H NMR  
CDCl<sub>3</sub>

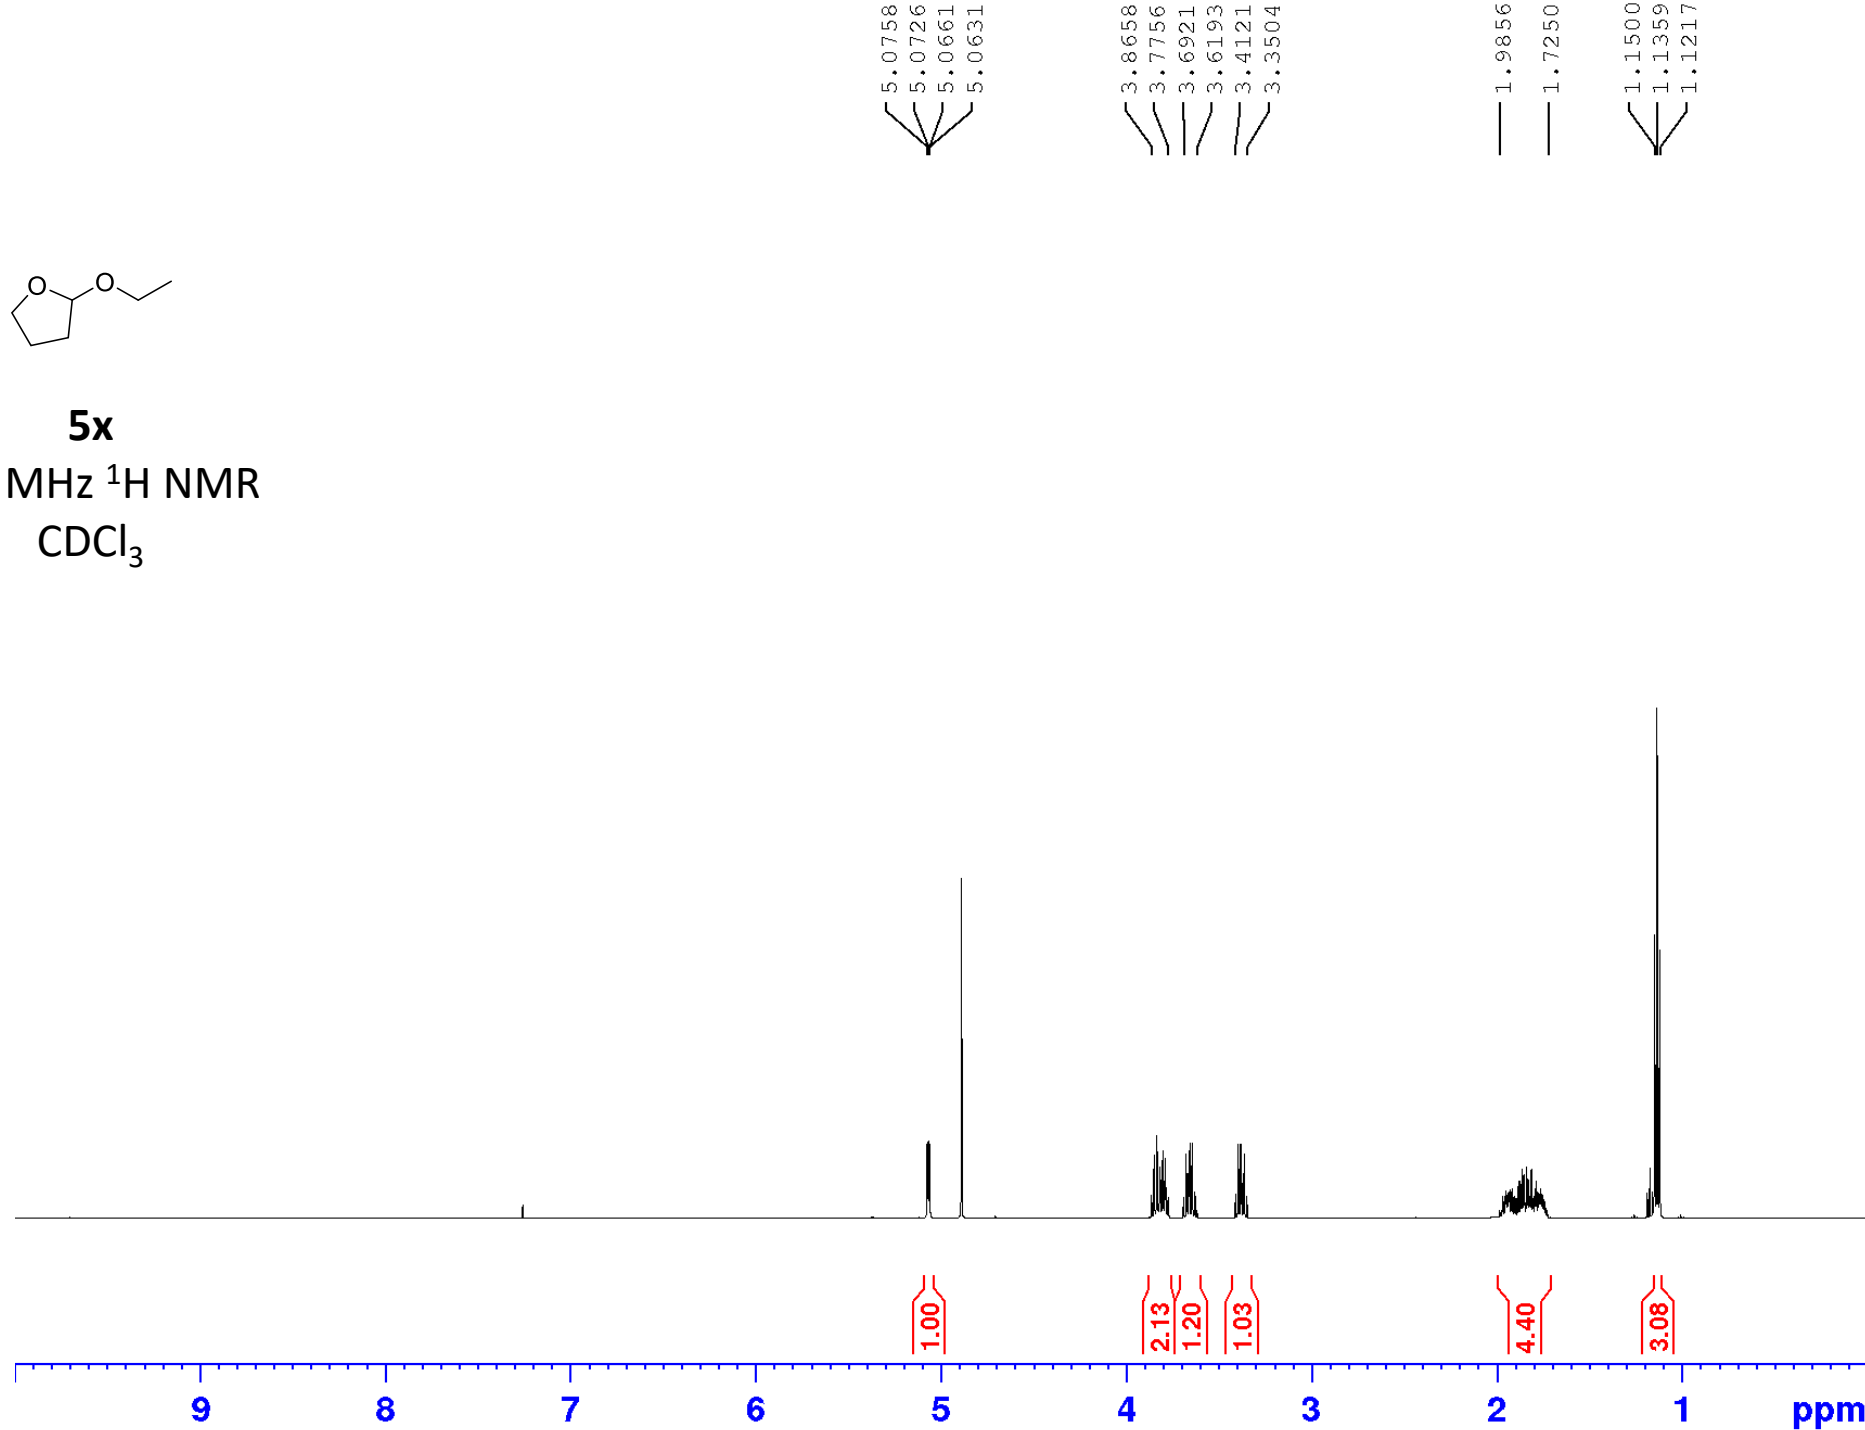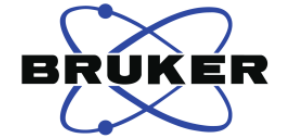

```
Current Data Parameters
NAME      vinn-4-183-6-20h-20230318
EXPNO     1
PROCNO    1

F2 - Acquisition Parameters
Date_     20230318
Time      15.34 h
INSTRUM   spect
PROBHD    zg30
PULPROG   zg30
TD         65536
SOLVENT   cdcl3
NS         16
DS         2
SWH        10000.000 Hz
FIDRES     0.305176 Hz
AQ         3.2767999 sec
RG         13.21
DW         50.000 usec
DE         10.00 usec
TE         296.1 K
D1         1.00000000 sec
TD0        1
SFO1      500.1330883 MHz
NUC1       1H
P1         11.25 usec
PLW1      17.35199928 W

F2 - Processing parameters
SI         65536
SF         500.1300121 MHz
WDW        EM
SSB        0
LB         0.30 Hz
GB         0
PC         1.00
```

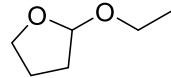

**5x**  
100 MHz  $^{13}\text{C}$  NMR  
 $\text{CDCl}_3$

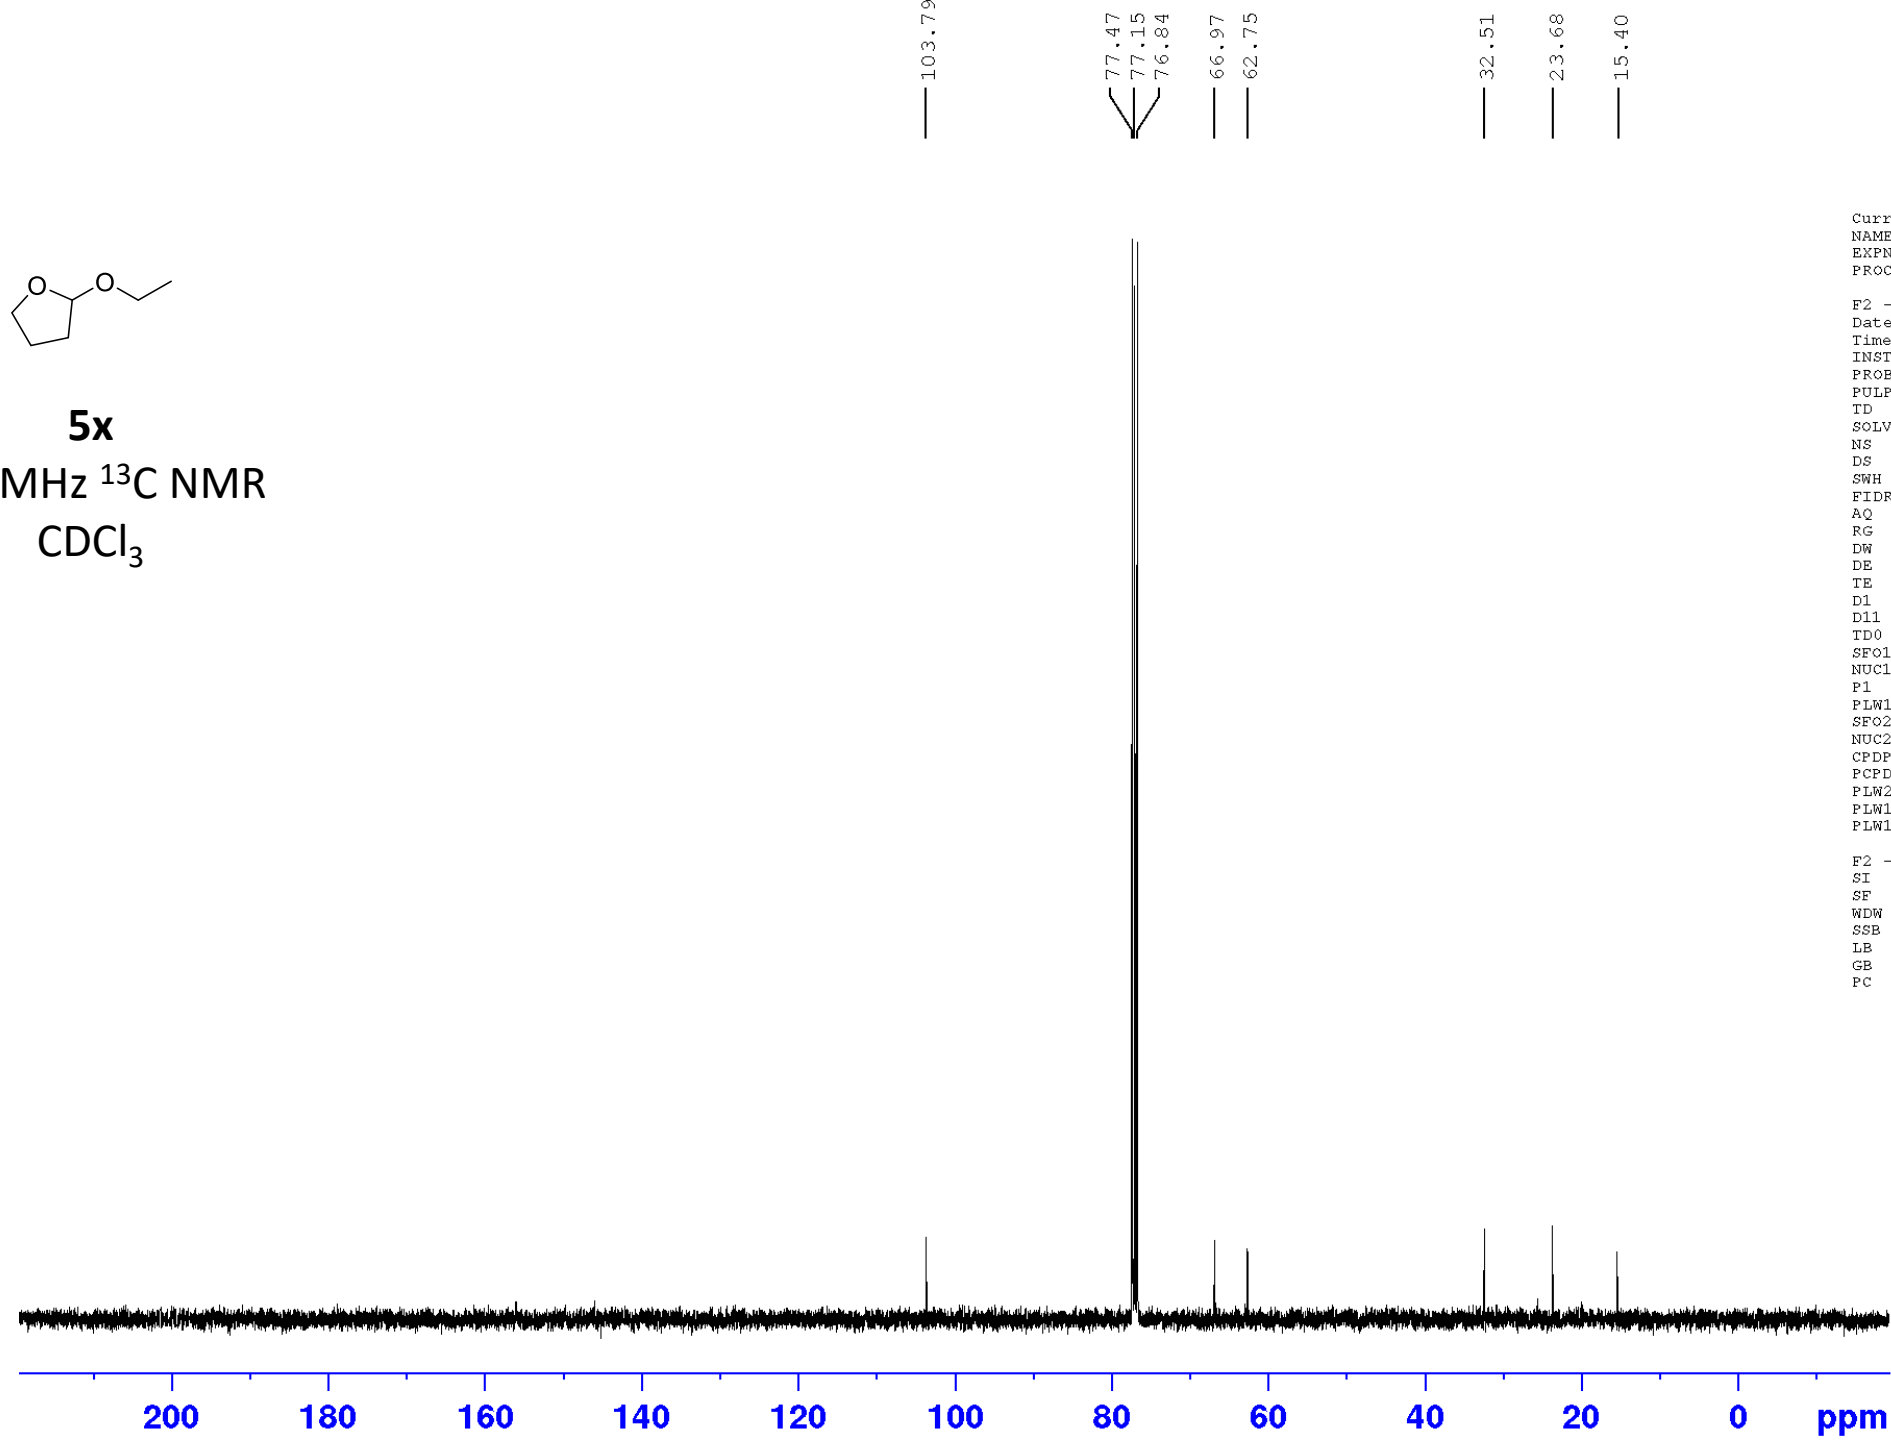

Current Data Parameters  
NAME vinn-4-183-6-isl-20230320  
EXPNO 2  
PROCNO 1

F2 - Acquisition Parameters  
Date\_ 20230320  
Time 12.48 h  
INSTRUM spect  
PROBHD Z108618\_0257 (  
PULPROG zgpg30  
TD 65536  
SOLVENT CDCl3  
NS 150  
DS 4  
SWH 24038.461 Hz  
FIDRES 0.733596 Hz  
AQ 1.3631488 sec  
RG 203  
DW 20.800 usec  
DE 6.50 usec  
TE 295.9 K  
D1 2.0000000 sec  
D11 0.0300000 sec  
TD0 1  
SFO1 100.6228298 MHz  
NUC1 13C  
P1 10.00 usec  
PLW1 51.0000000 W  
SFO2 400.1316005 MHz  
NUC2 1H  
CPDPRG2 waltz16  
PCPD2 90.00 usec  
PLW2 12.5000000 W  
PLW12 0.34722000 W  
PLW13 0.17465000 W

F2 - Processing parameters  
SI 32768  
SF 100.6127556 MHz  
WDW EM  
SSB 0  
LB 1.00 Hz  
GB 0  
PC 1.40

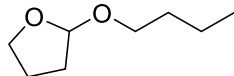

**5y**  
500 MHz <sup>1</sup>H NMR  
CDCl<sub>3</sub>

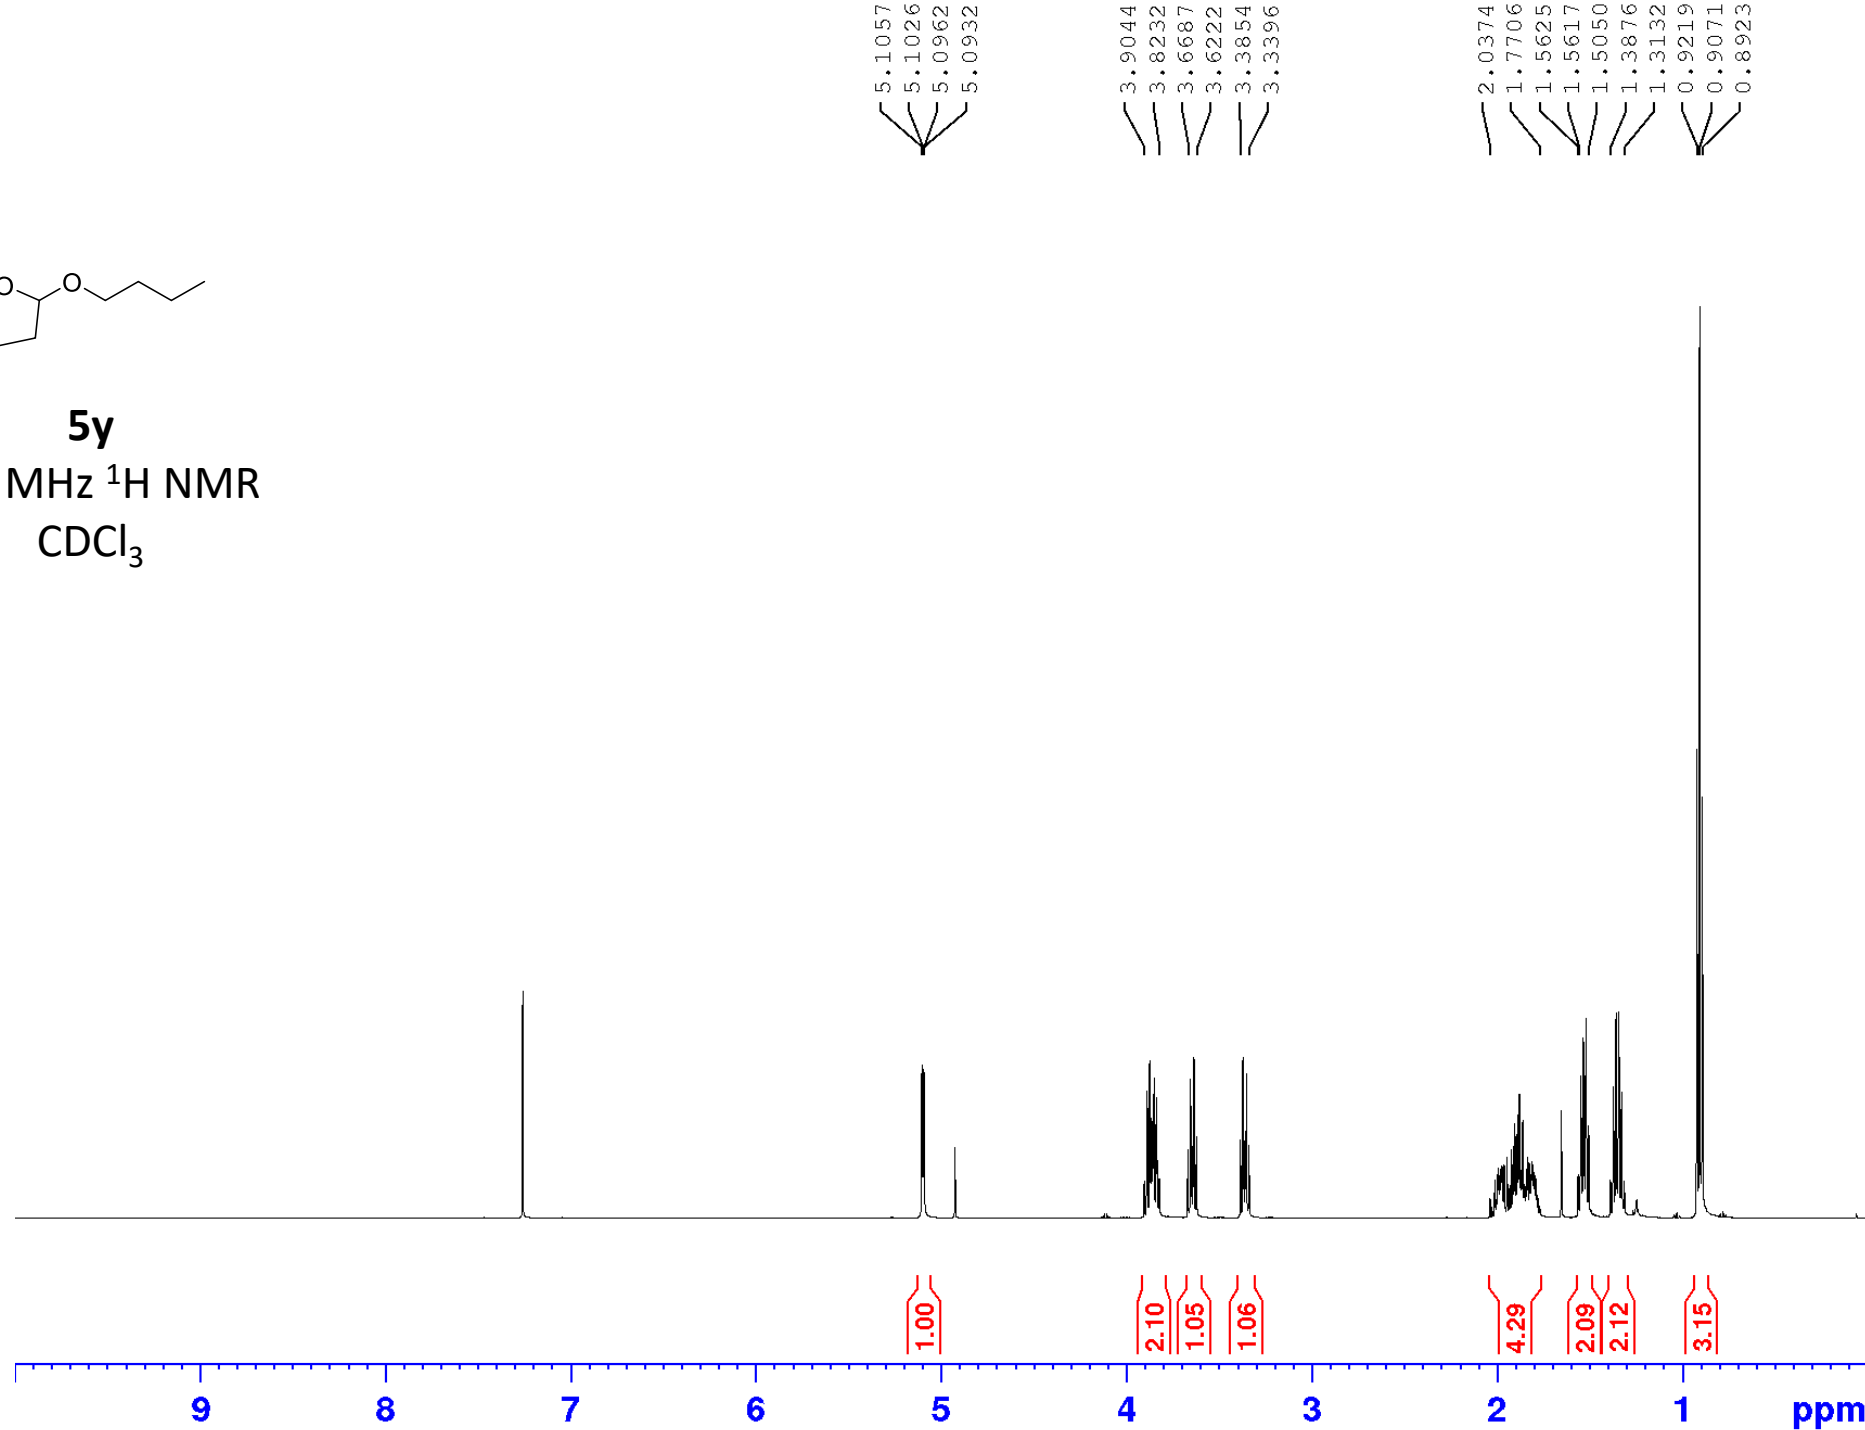

Current Data Parameters  
NAME vinn-4-149-4-isl-20200119  
EXPNO 1  
PROCNO 1

F2 - Acquisition Parameters  
Date\_ 20210119  
Time 21.09 h  
INSTRUM spect  
PROBHD z119470\_0283 {  
PULPROG zg30  
TD 65536  
SOLVENT cdcl3  
NS 16  
DS 2  
SWH 10000.000 Hz  
FIDRES 0.305176 Hz  
AQ 3.2767999 sec  
RG 63.76  
DW 50.000 usec  
DE 6.50 usec  
TE 295.1 K  
D1 1.00000000 sec  
TD0 1  
SFO1 500.1330883 MHz  
NUC1 1H  
P1 10.91 usec  
PLW1 25.00000000 W

F2 - Processing parameters  
SI 65536  
SF 500.1300121 MHz  
WDW EM  
SSB 0  
LB 0.30 Hz  
GB 0  
PC 1.00

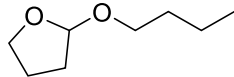

**5y**  
125 MHz <sup>13</sup>C NMR  
CDCl<sub>3</sub>

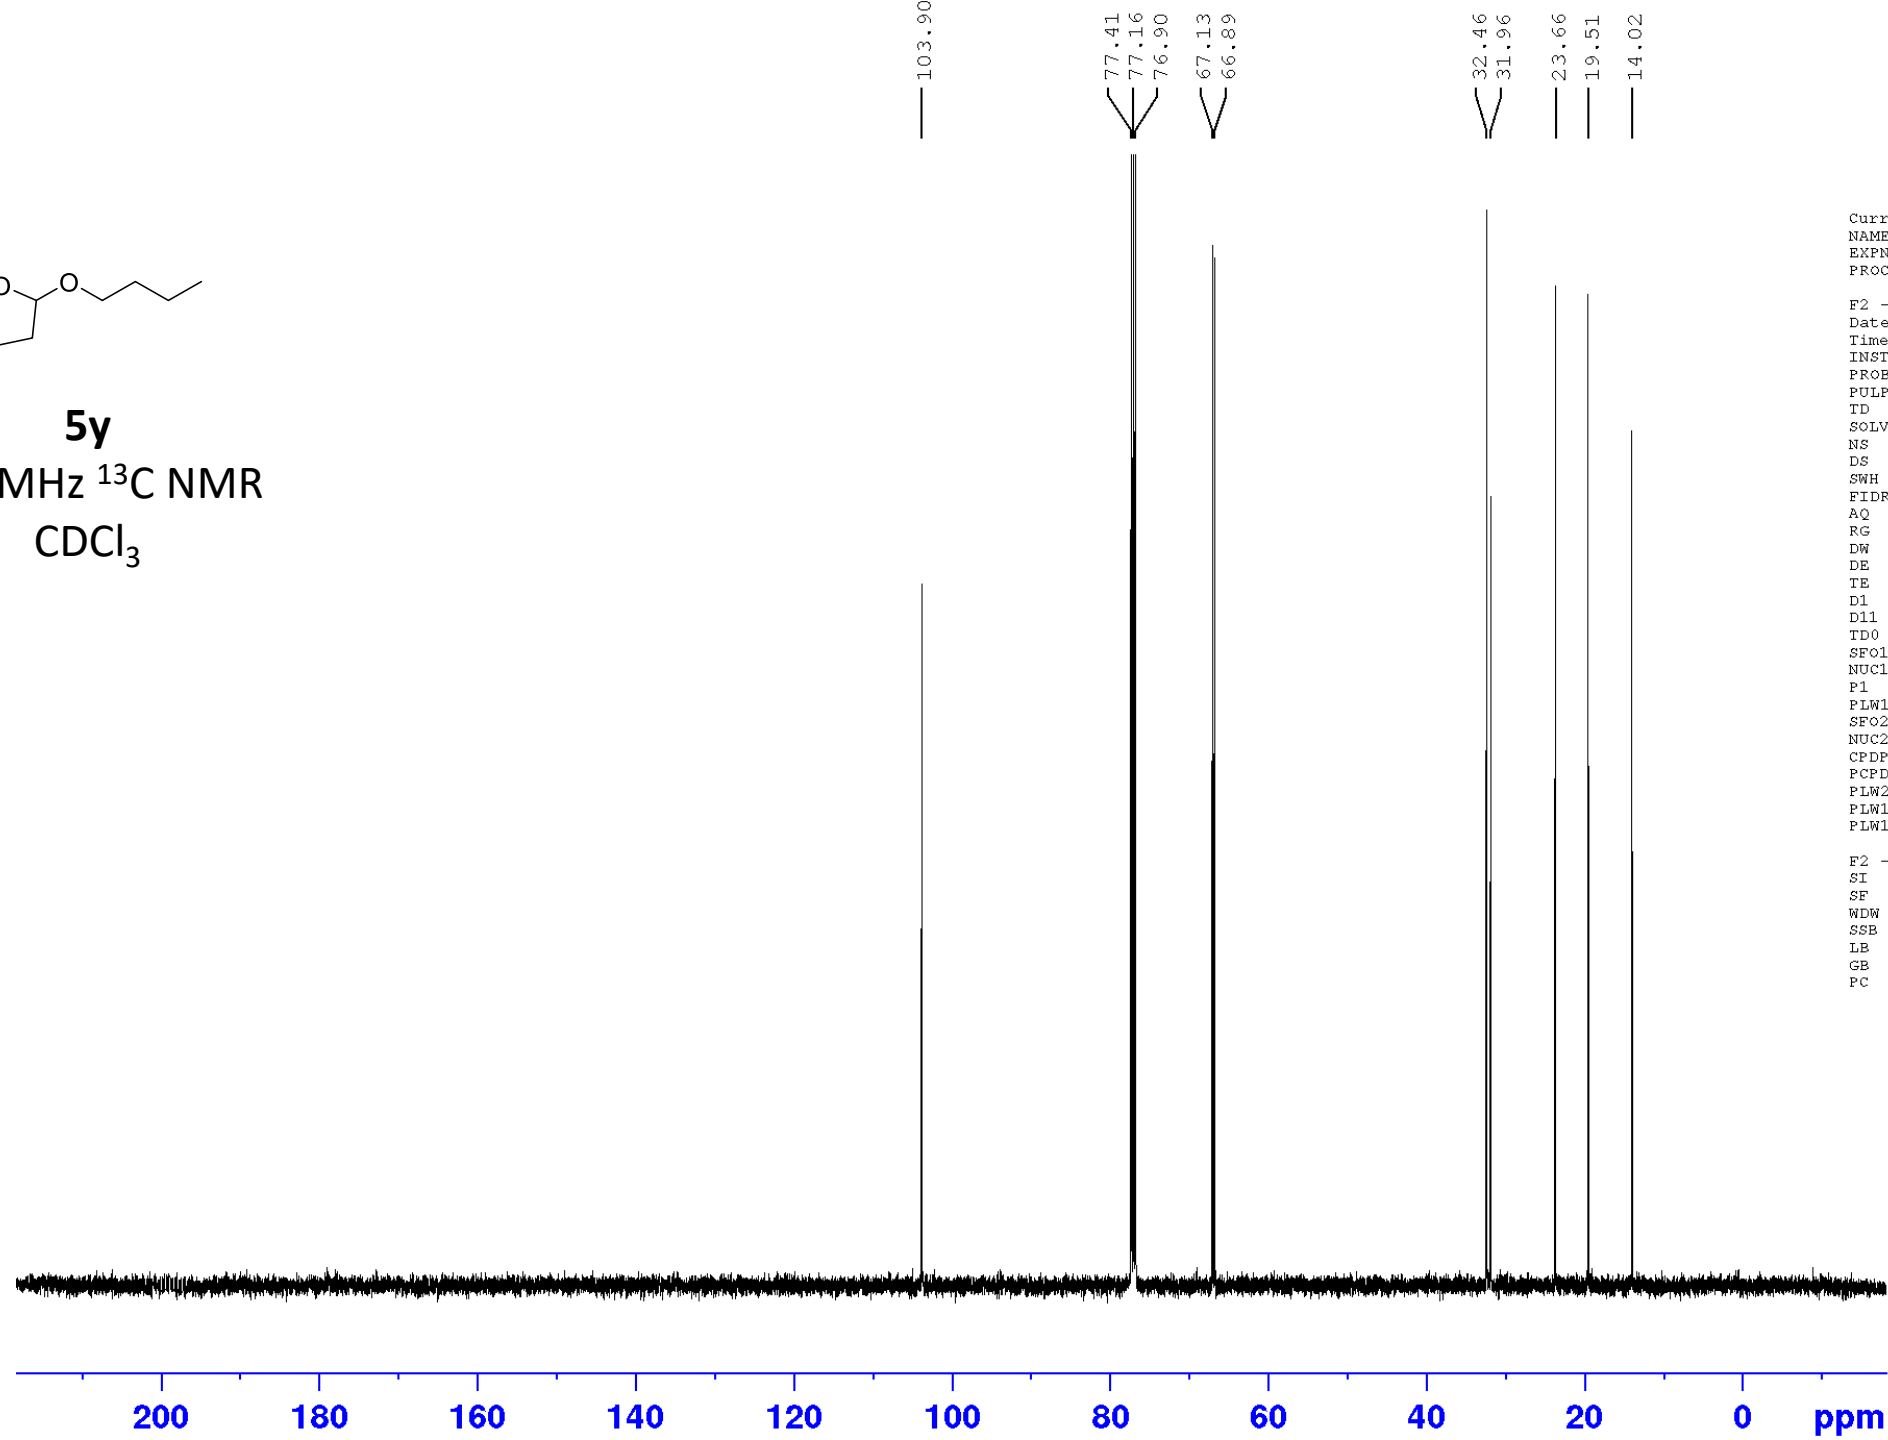

Current Data Parameters  
NAME vinn-4-149-4-isl-20200119  
EXPNO 2  
PROCNO 1

F2 - Acquisition Parameters

Date\_ 20210119  
Time 21.23 h  
INSTRUM spect  
PROBHD Z119470\_0283 (  
PULPROG zgpg30  
TD 65536  
SOLVENT CDCl3  
NS 256  
DS 4  
SWH 29761.904 Hz  
FIDRES 0.908261 Hz  
AQ 1.1010048 sec  
RG 206.72  
DW 16.800 usec  
DE 6.50 usec  
TE 295.2 K  
D1 2.0000000 sec  
D11 0.0300000 sec  
TD0 1  
SFO1 125.7703643 MHz  
NUC1 13C  
P1 9.75 usec  
PLW1 94.0000000 W  
SFO2 500.1320005 MHz  
NUC2 1H  
CPDPRG[2] waltz16  
PCPD2 80.00 usec  
PLW2 25.0000000 W  
PLW12 0.46495000 W  
PLW13 0.23387000 W

F2 - Processing parameters

SI 32768  
SF 125.7577728 MHz  
WDW EM  
SSB 0  
LB 1.00 Hz  
GB 0  
PC 1.40

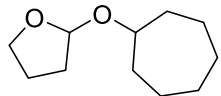

**5z**

500 MHz <sup>1</sup>H NMR  
CDCl<sub>3</sub>

5.2135  
5.2116  
5.2020

3.8889  
3.7925  
3.7169  
3.7083  
3.6998  
3.6913  
3.6827  
3.6743  
3.6658

2.0189  
1.9379  
1.9151  
1.7440  
1.6369  
1.4689  
1.4042  
1.3258

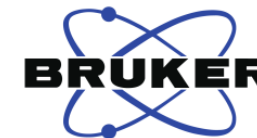

Current Data Parameters  
NAME vinn-4-149-8-isl-20200119  
EXPNO 1  
PROCNO 1

F2 - Acquisition Parameters  
Date\_ 20210119  
Time 22.02 h  
INSTRUM spect  
PROBHD z119470\_0283 {  
PULPROG zg30  
TD 65536  
SOLVENT cdcl3  
NS 16  
DS 2  
SWH 10000.000 Hz  
FIDRES 0.305176 Hz  
AQ 3.2767999 sec  
RG 30.85  
DW 50.000 usec  
DE 6.50 usec  
TE 295.1 K  
D1 1.00000000 sec  
TD0 1  
SFO1 500.1330883 MHz  
NUC1 1H  
P1 10.91 usec  
PLW1 25.00000000 W

F2 - Processing parameters  
SI 65536  
SF 500.1300125 MHz  
WDW EM  
SSB 0  
LB 0.30 Hz  
GB 0  
PC 1.00

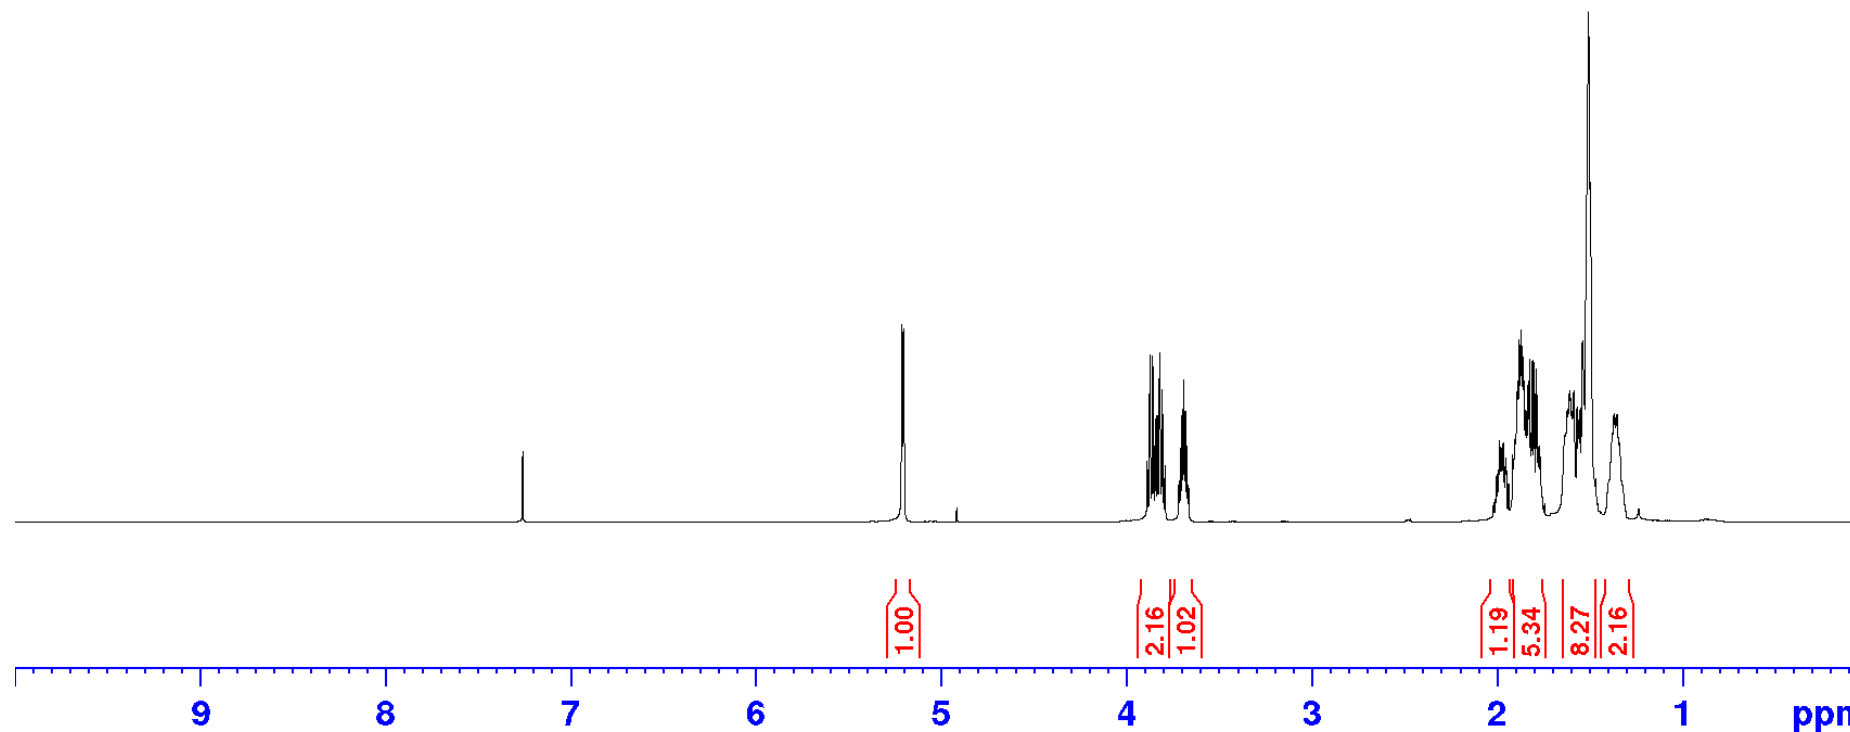



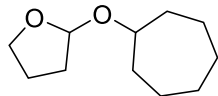

**5z**

125 MHz <sup>13</sup>C NMR  
CDCl<sub>3</sub>

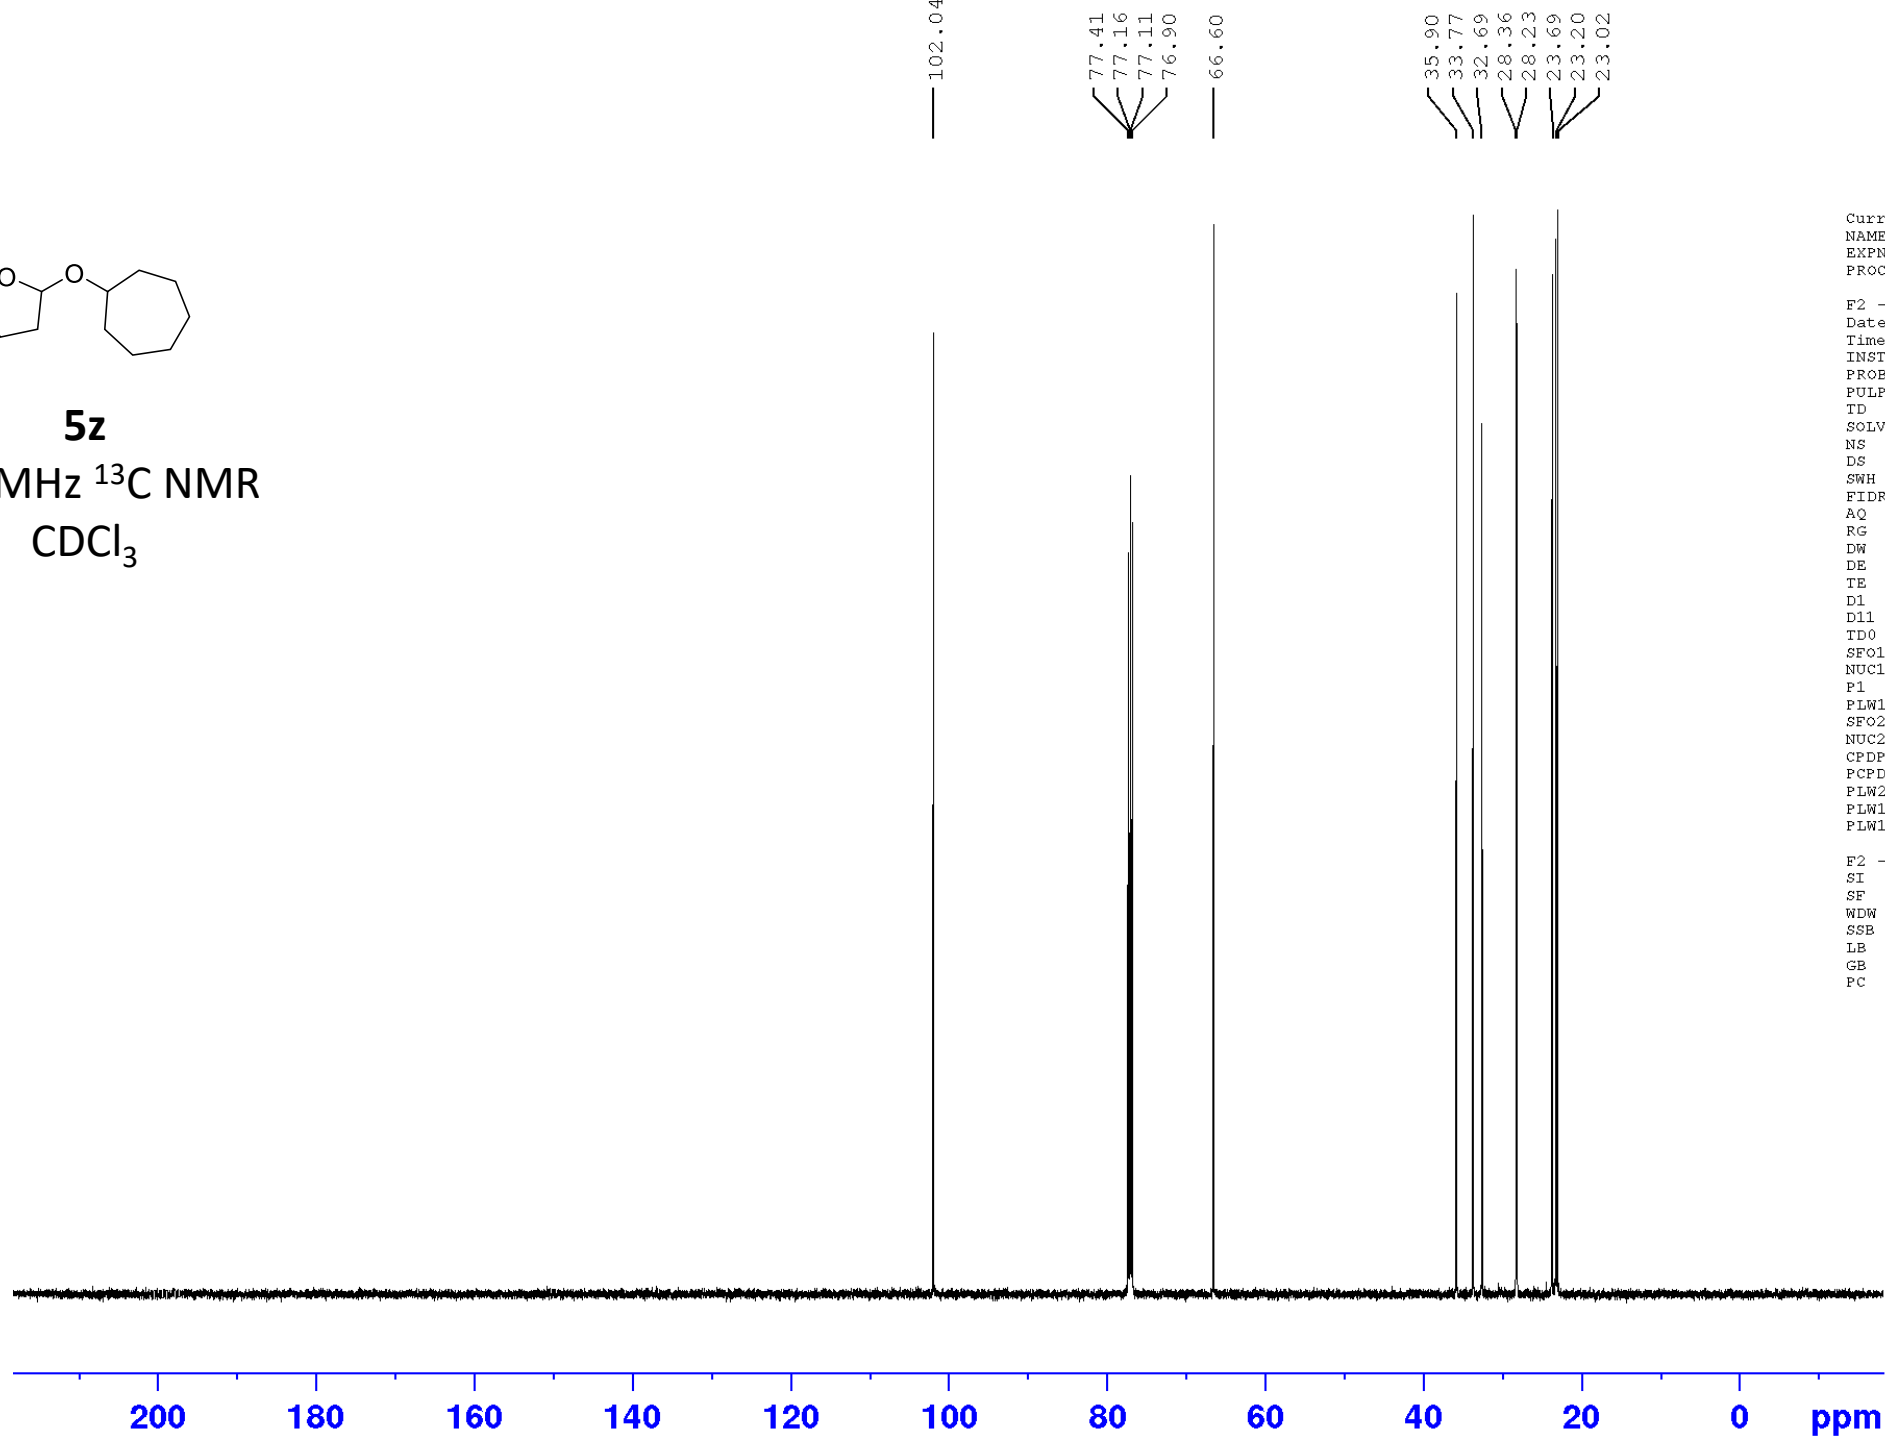

Current Data Parameters  
NAME vinn-4-149-8-isl-20200119  
EXPNO 2  
PROCNO 1

F2 - Acquisition Parameters  
Date\_ 20210119  
Time 22.16 h  
INSTRUM spect  
PROBHD Z119470\_0283 (  
PULPROG zgpg30  
TD 65536  
SOLVENT CDCl3  
NS 256  
DS 4  
SWH 29761.904 Hz  
FIDRES 0.908261 Hz  
AQ 1.1010048 sec  
RG 206.72  
DW 16.800 usec  
DE 6.50 usec  
TE 295.1 K  
D1 2.0000000 sec  
D11 0.0300000 sec  
TD0 1  
SFO1 125.7703643 MHz  
NUC1 13C  
P1 9.75 usec  
PLW1 94.0000000 W  
SFO2 500.1320005 MHz  
NUC2 1H  
CPDPRG[2] waltz16  
PCPD2 80.00 usec  
PLW2 25.0000000 W  
PLW12 0.46495000 W  
PLW13 0.23387000 W

F2 - Processing parameters  
SI 32768  
SF 125.7577754 MHz  
WDW EM  
SSB 0  
LB 1.00 Hz  
GB 0  
PC 1.40

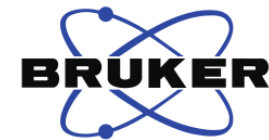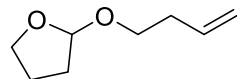

**5aa**  
500 MHz <sup>1</sup>H NMR  
CDCl<sub>3</sub>

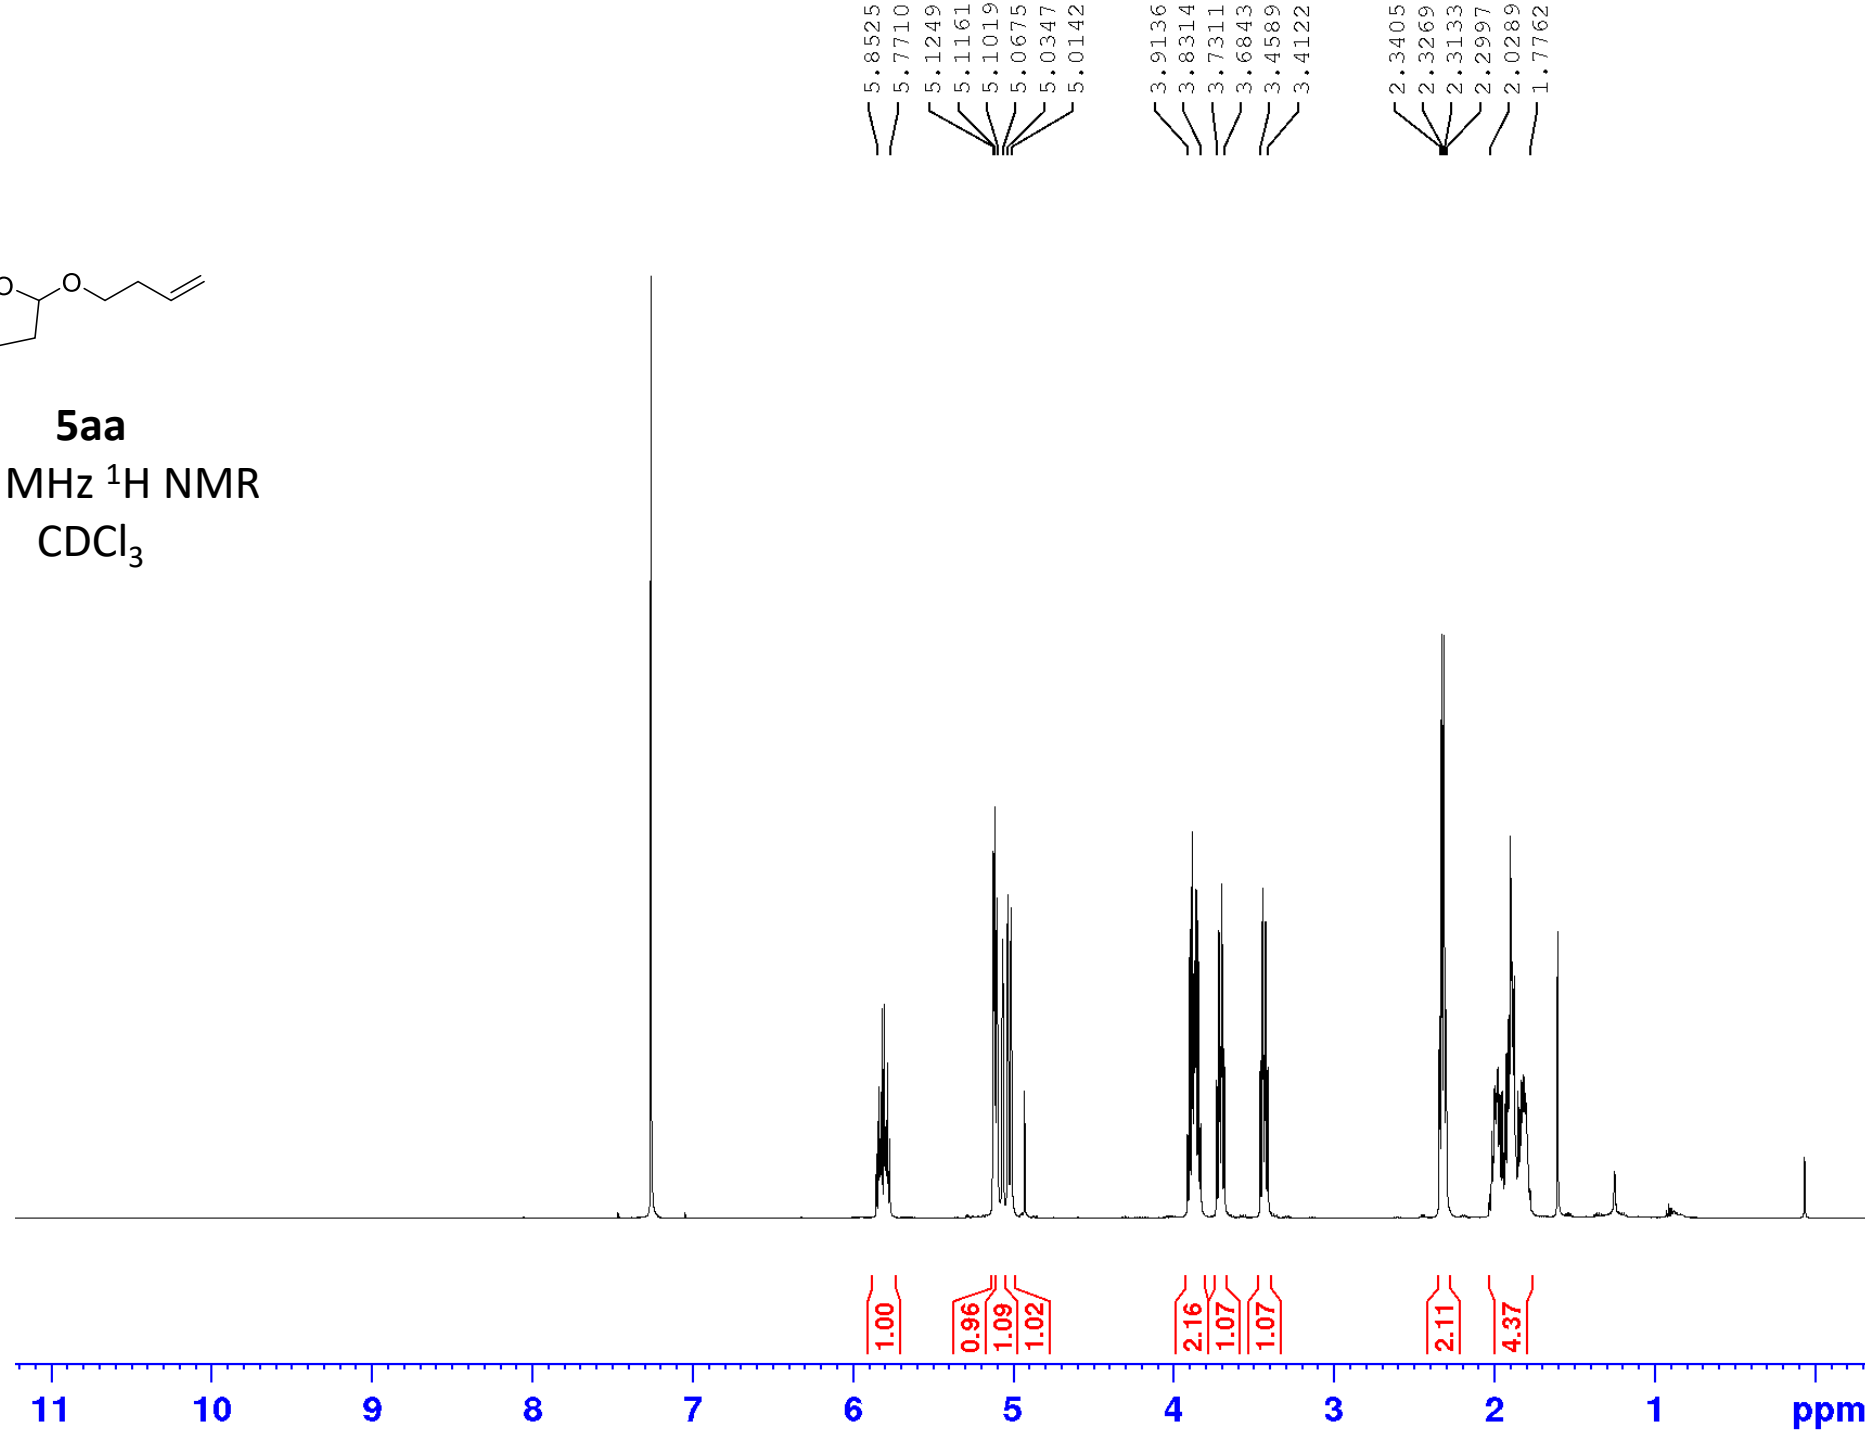

```
Current Data Parameters
NAME vinn-4-149-13-ialt-2020013
EXPNO 1
PROCNO 1

F2 - Acquisition Parameters
Date_ 20210130
Time 18.53 h
INSTRUM spect
PROBHD z119470_0283 {
PULPROG zg30
TD 65536
SOLVENT cdcl3
NS 16
DS 2
SWH 10000.000 Hz
FIDRES 0.305176 Hz
AQ 3.2767999 sec
RG 93.28
DW 50.000 usec
DE 6.50 usec
TE 295.1 K
D1 1.00000000 sec
TDO 1
SFO1 500.1330883 MHz
NUC1 1H
P1 10.91 usec
PLW1 25.00000000 W

F2 - Processing parameters
SI 65536
SF 500.1300122 MHz
WDW EM
SSB 0
LB 0.30 Hz
GB 0
PC 1.00
```

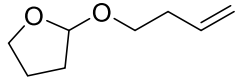

**5aa**

125 MHz <sup>13</sup>C NMR  
CDCl<sub>3</sub>

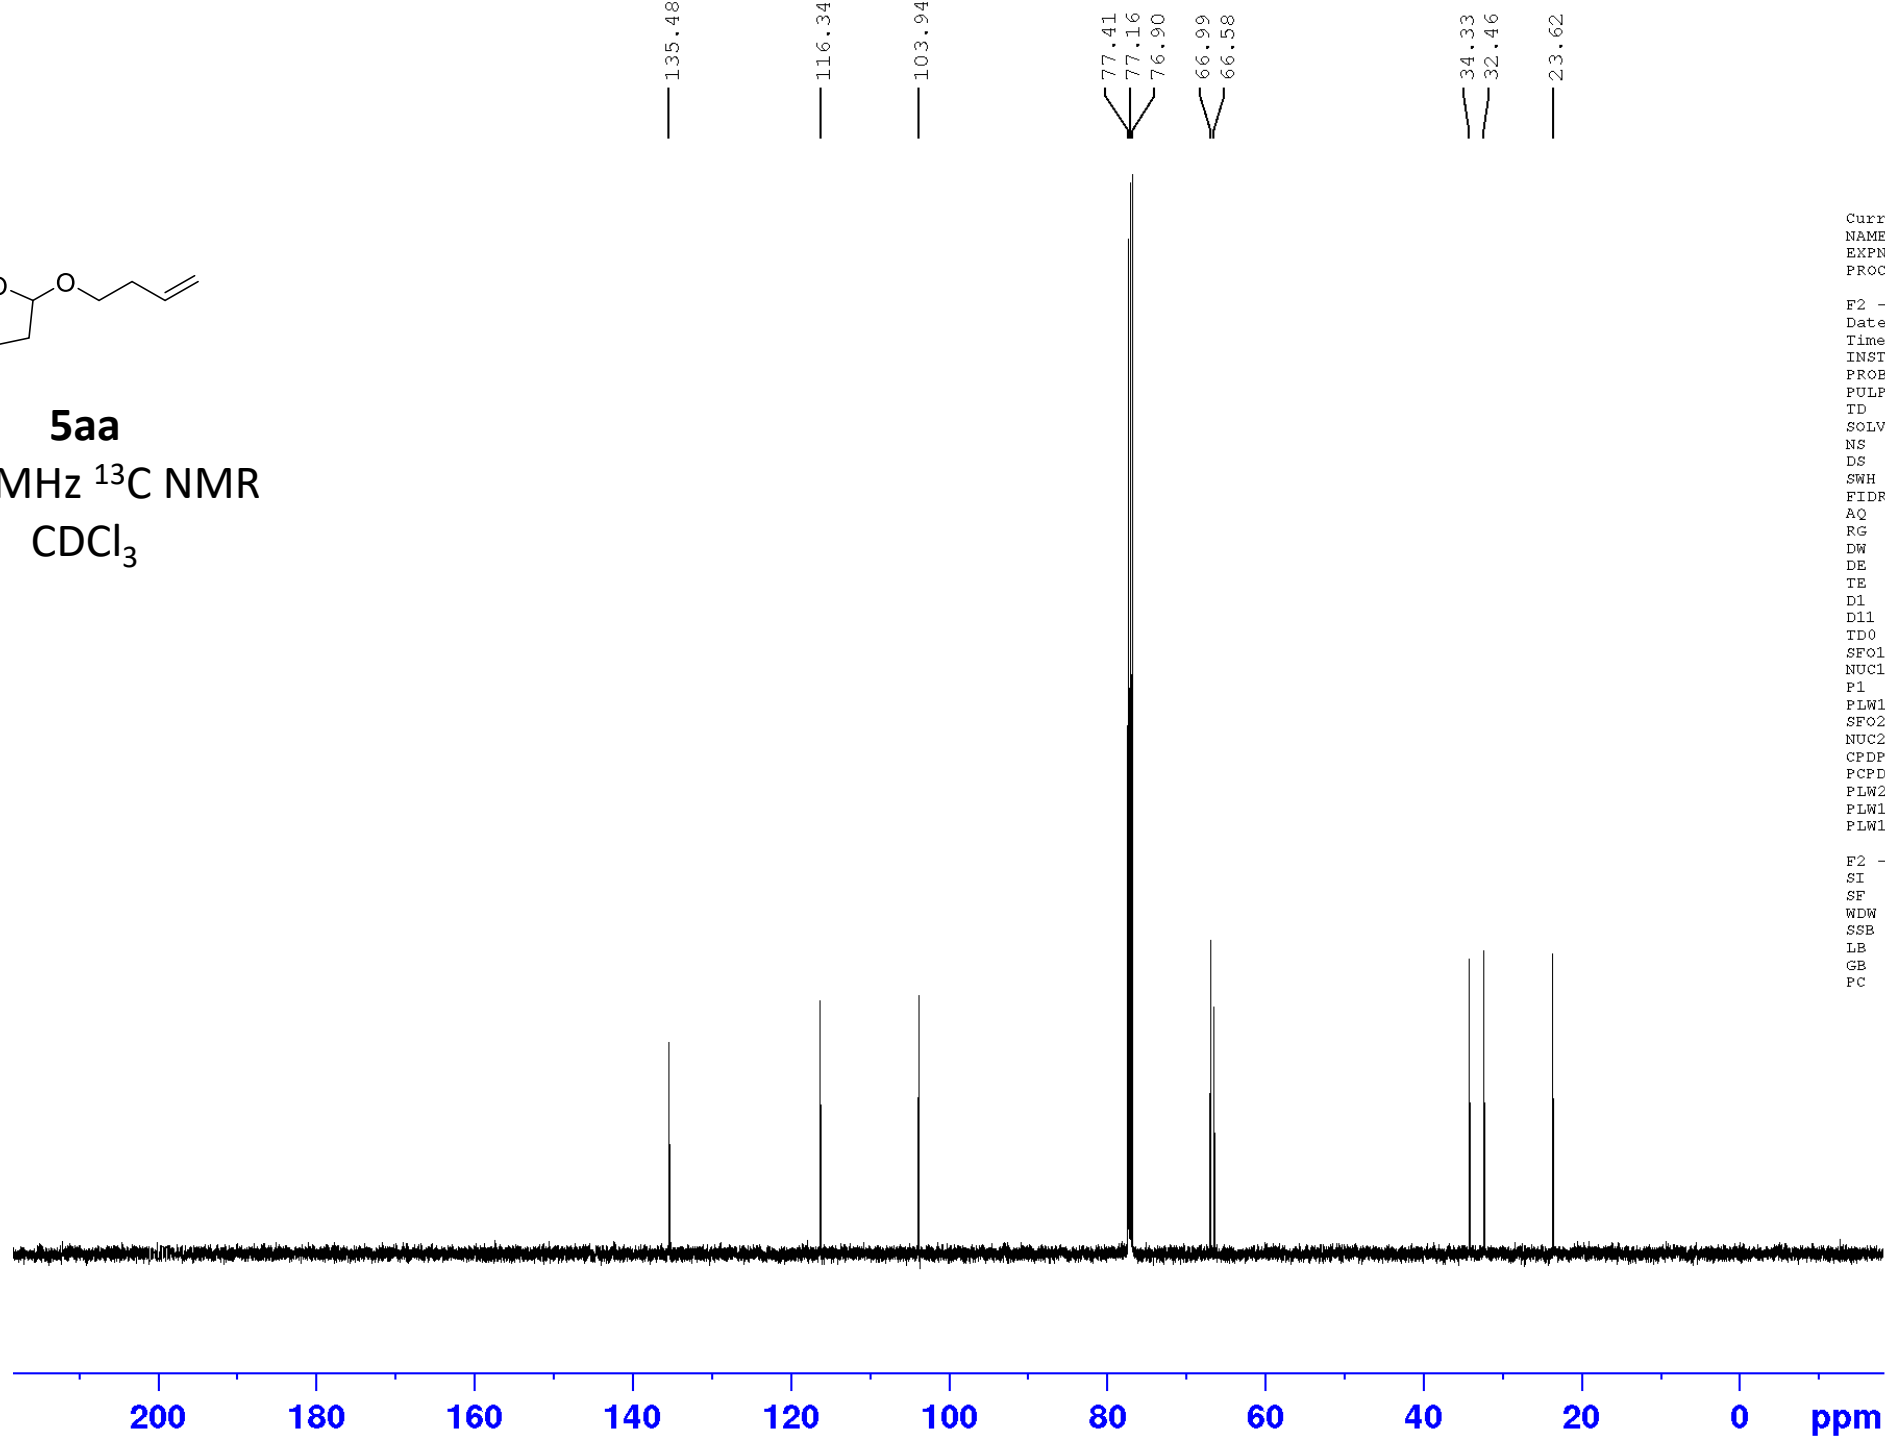

```
Current Data Parameters
NAME      vinn-4-149-13-islt-20200130
EXPNO     2
PROCNO    1

F2 - Acquisition Parameters
Date_     20210130
Time      19.00 h
INSTRUM   spect
PROBHD    Z119470_0283 (
PULPROG   zgpg30
TD         65536
SOLVENT   CDCl3
NS         128
DS         4
SWH        29761.904 Hz
FIDRES     0.908261 Hz
AQ         1.1010048 sec
RG         206.72
DW         16.800 usec
DE         6.50 usec
TE         295.2 K
D1         2.0000000 sec
D11        0.0300000 sec
TD0        1
SFO1       125.7703643 MHz
NUC1       13C
P1         9.75 usec
PLW1       94.0000000 W
SFO2       500.1320005 MHz
NUC2       1H
CPDPRG[2] waltz16
PCPD2      80.00 usec
PLW2       25.0000000 W
PLW12      0.46495000 W
PLW13      0.23387000 W

F2 - Processing parameters
SI         32768
SF         125.7577727 MHz
WDW        EM
SSB        0
LB         1.00 Hz
GB         0
PC         1.40
```

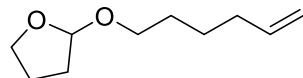

**5ab**  
500 MHz <sup>1</sup>H NMR  
CDCl<sub>3</sub>

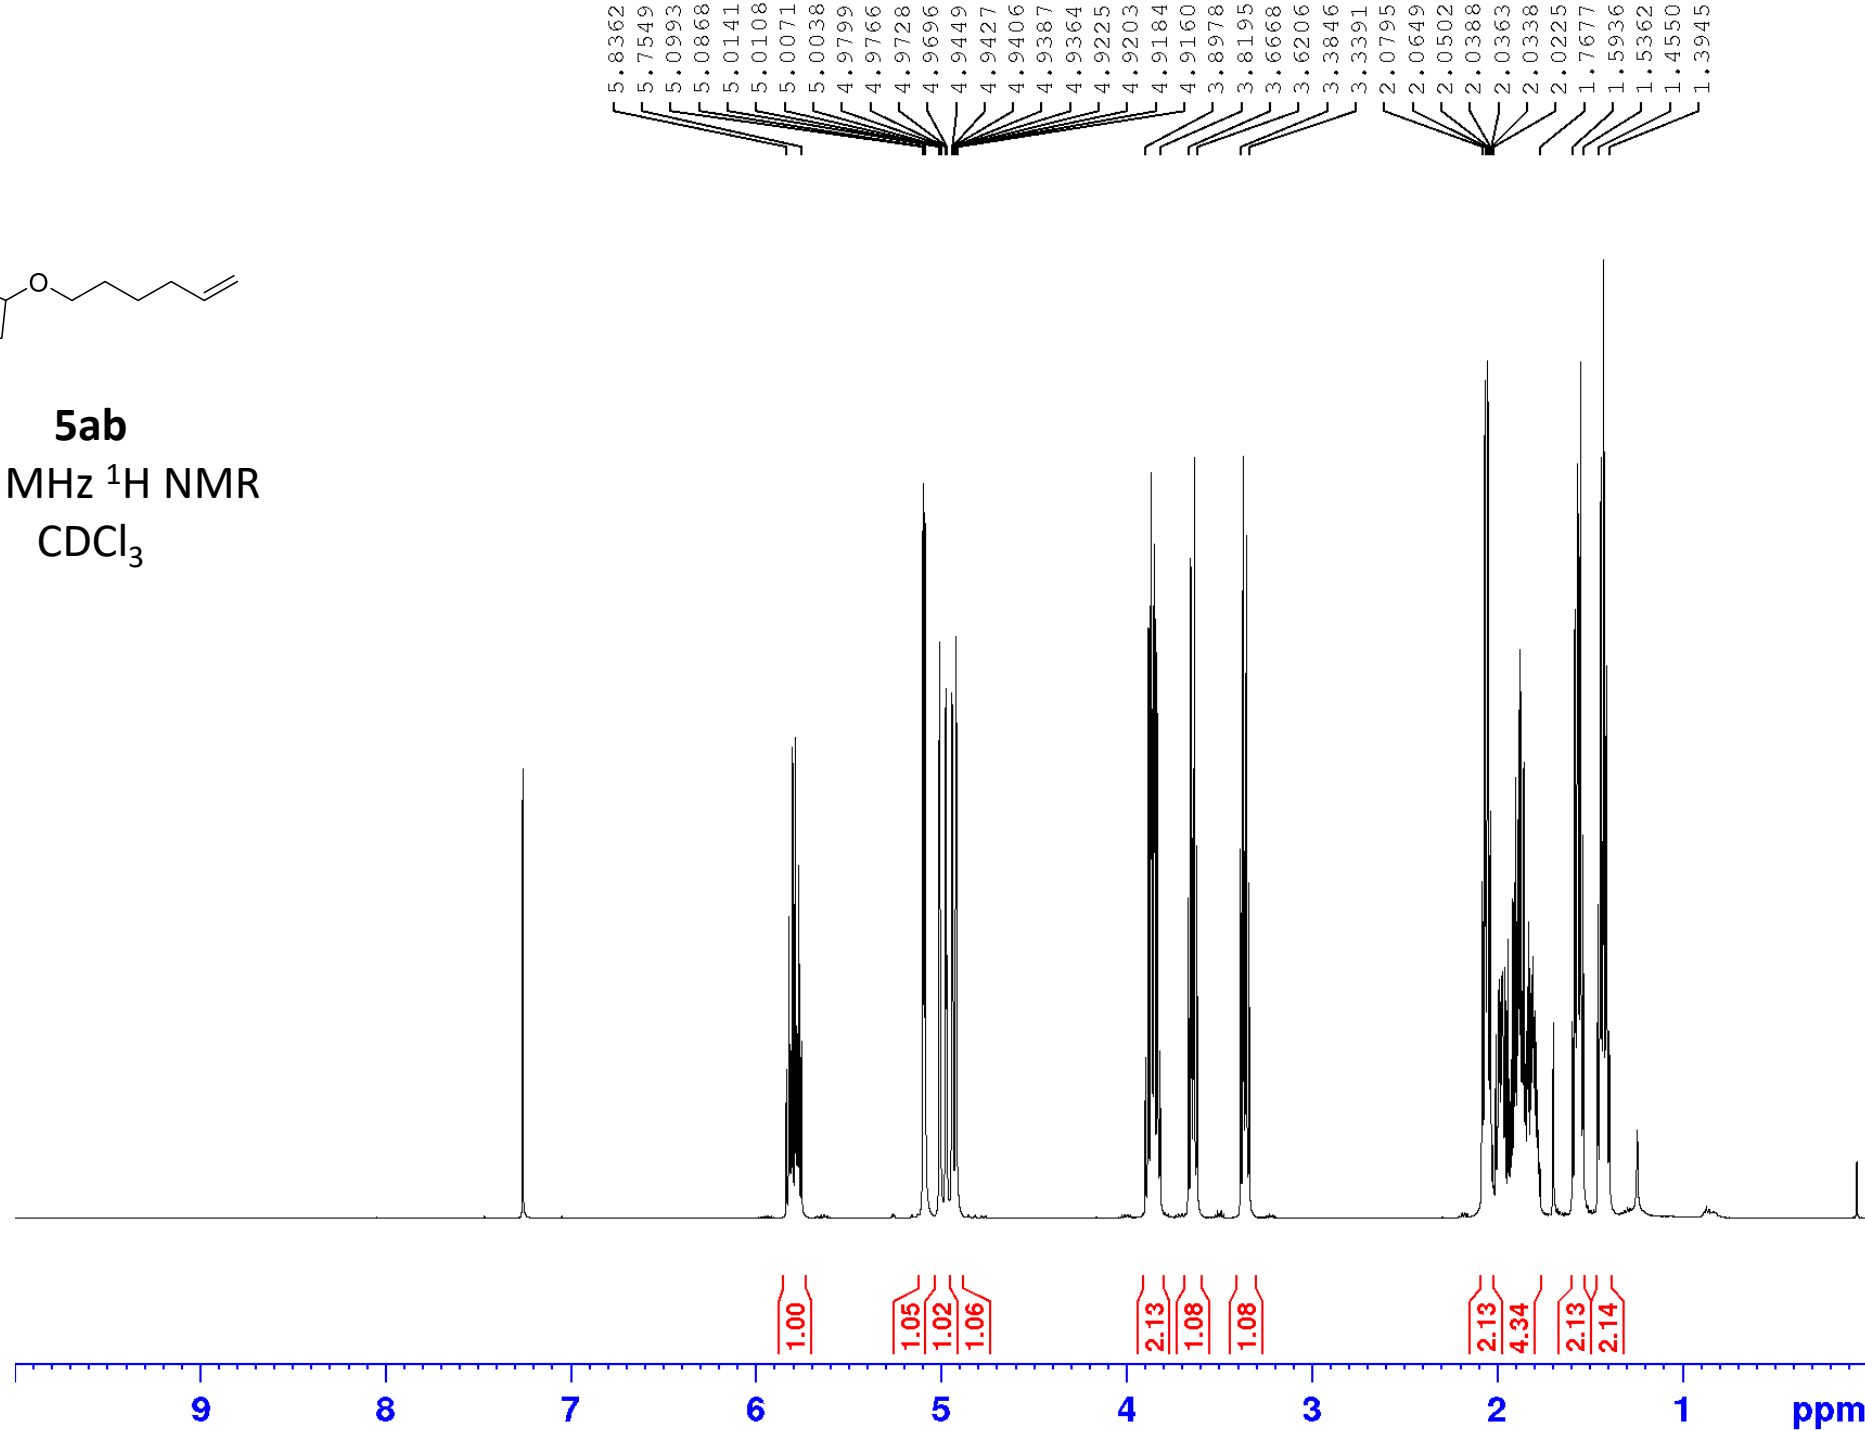

```

Current Data Parameters
NAME      vinn-4-149-9-ist-20200119
EXPNO    1
PROCNO   1

F2 - Acquisition Parameters
Date_    20210119
Time     22.20 h
INSTRUM  spect
PROBHD   zg30
PULPROG  zg30
TD       65536
SOLVENT  CDCl3
NS       16
DS       2
SWH      10000.000 Hz
FIDRES   0.305176 Hz
AQ       3.2767999 sec
RG       30.85
DW       50.000 usec
DE       6.50 usec
TE       295.1 K
D1       1.00000000 sec
TD0      1
SFO1     500.1330883 MHz
NUC1     1H
F1       10.91 usec
PLW1     25.00000000 W

F2 - Processing parameters
SI       65536
SF       500.1300123 MHz
WDW      EM
SSB      0
LB       0.30 Hz
GB       0
PC       1.00
  
```



**5ab**  
125 MHz <sup>13</sup>C NMR  
CDCl<sub>3</sub>

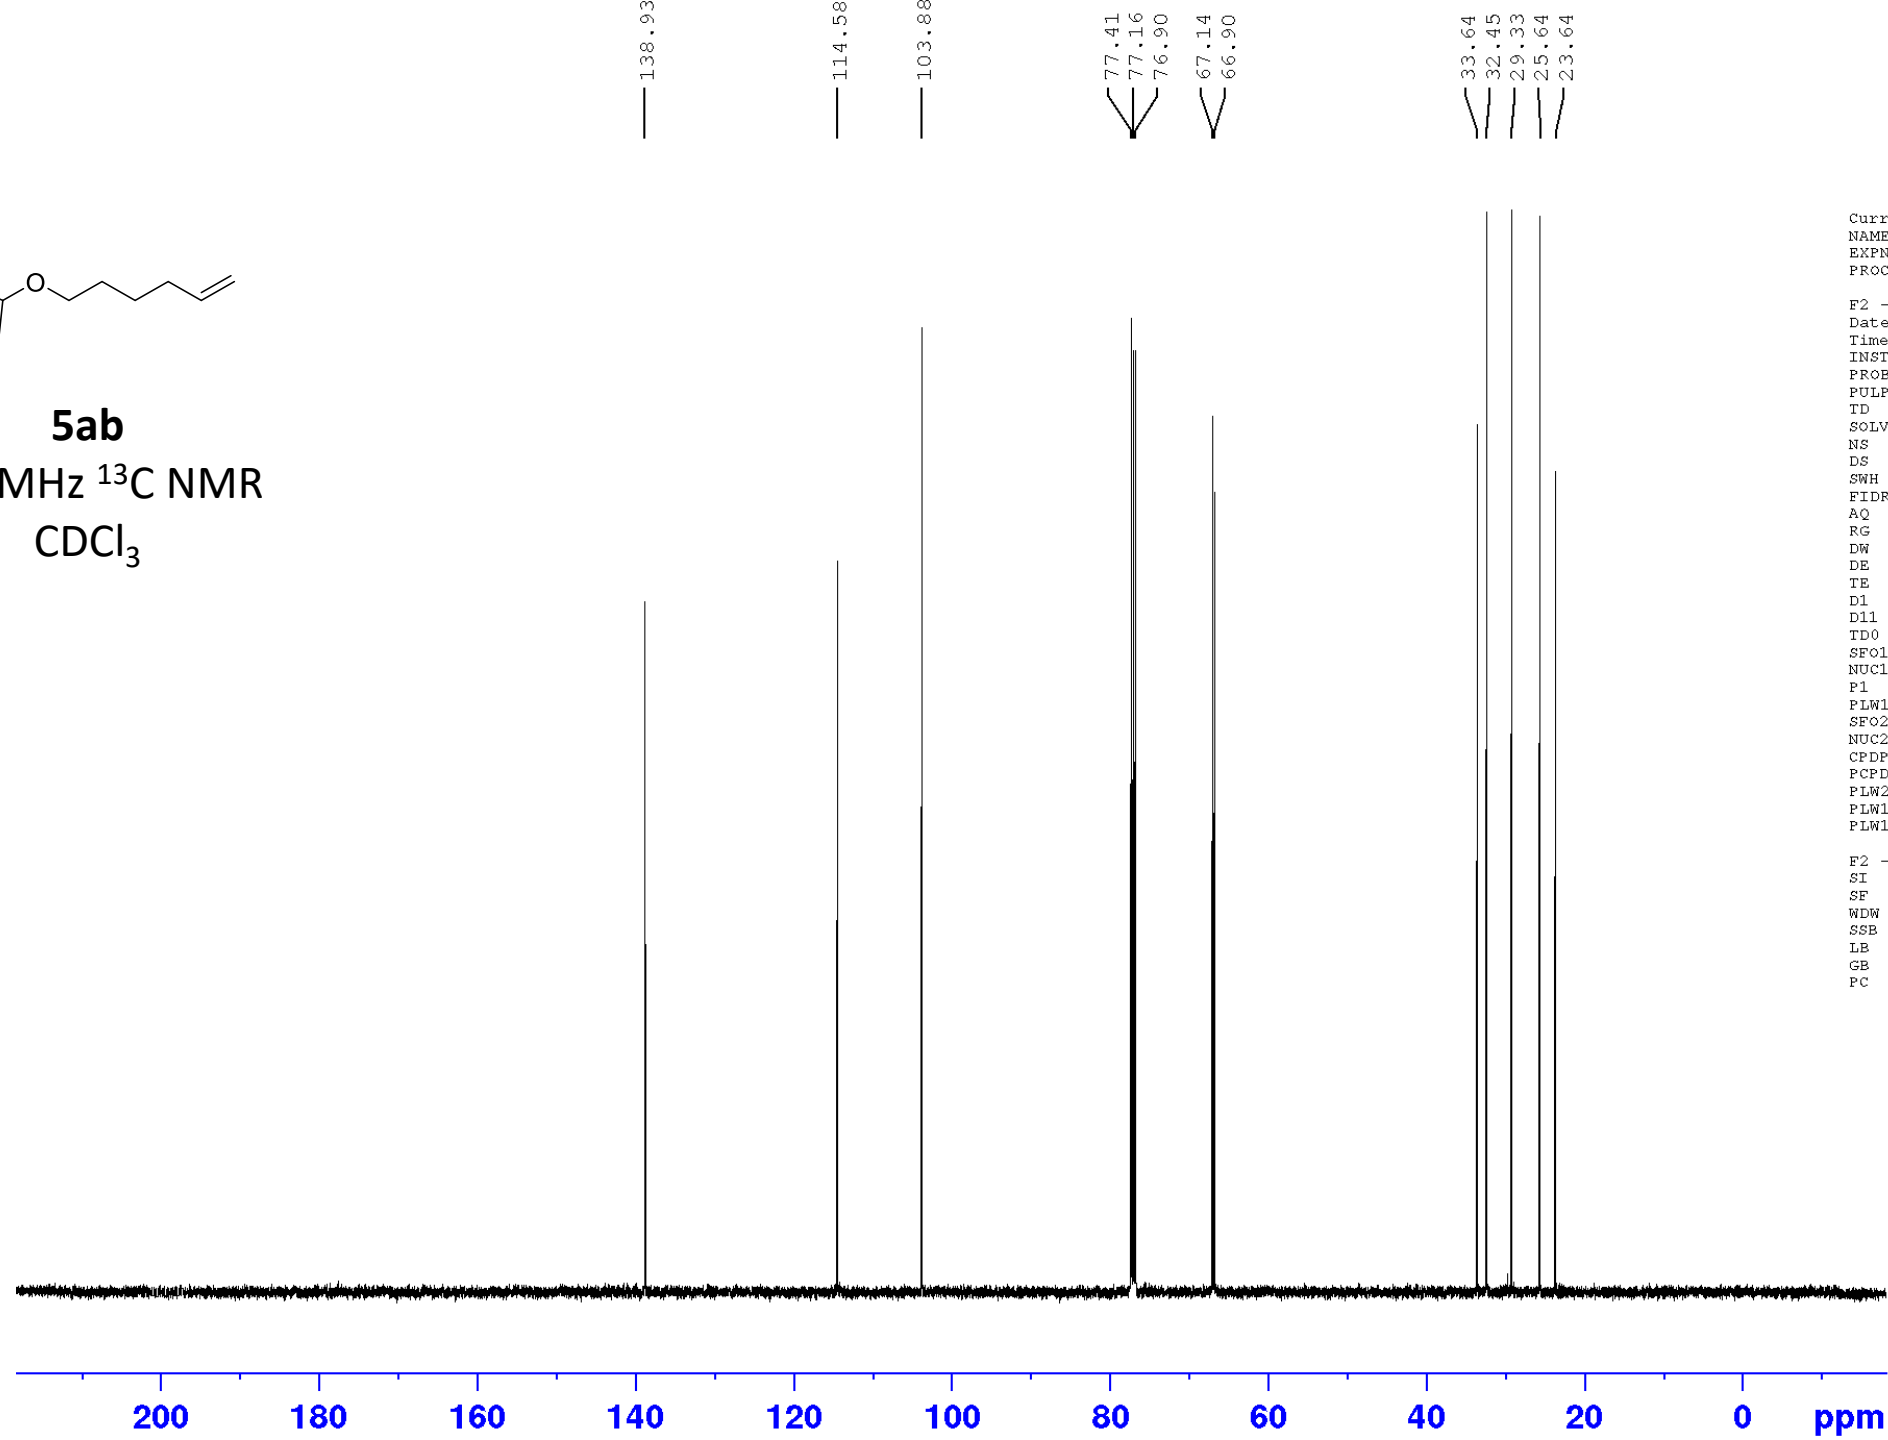

Current Data Parameters  
NAME vinn-4-149-9-isl-20200119  
EXPNO 2  
PROCNO 1

F2 - Acquisition Parameters  
Date\_ 20210119  
Time 22.34 h  
INSTRUM spect  
PROBHD Z119470\_0283 (  
PULPROG zgpg30  
TD 65536  
SOLVENT CDCl3  
NS 256  
DS 4  
SWH 29761.904 Hz  
FIDRES 0.908261 Hz  
AQ 1.1010048 sec  
RG 206.72  
DW 16.800 usec  
DE 6.50 usec  
TE 295.1 K  
D1 2.0000000 sec  
D11 0.03000000 sec  
TD0 1  
SFO1 125.7703643 MHz  
NUC1 13C  
P1 9.75 usec  
PLW1 94.0000000 W  
SFO2 500.1320005 MHz  
NUC2 1H  
CPDPRG[2] waltz16  
PCPD2 80.00 usec  
PLW2 25.0000000 W  
PLW12 0.46495000 W  
PLW13 0.23387000 W

F2 - Processing parameters  
SI 32768  
SF 125.7577740 MHz  
WDW EM  
SSB 0  
LB 1.00 Hz  
GB 0  
PC 1.40



5.1472  
5.1417  
5.1354  
3.9154  
3.8281  
3.7658  
3.7190  
3.5610  
3.5132  
2.4604  
2.4554  
2.4465  
2.4415  
2.4325  
2.4276  
2.0270  
1.9528  
1.9256  
1.8870  
1.8472  
1.7713

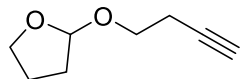

**5ac**  
500 MHz <sup>1</sup>H NMR  
CDCl<sub>3</sub>

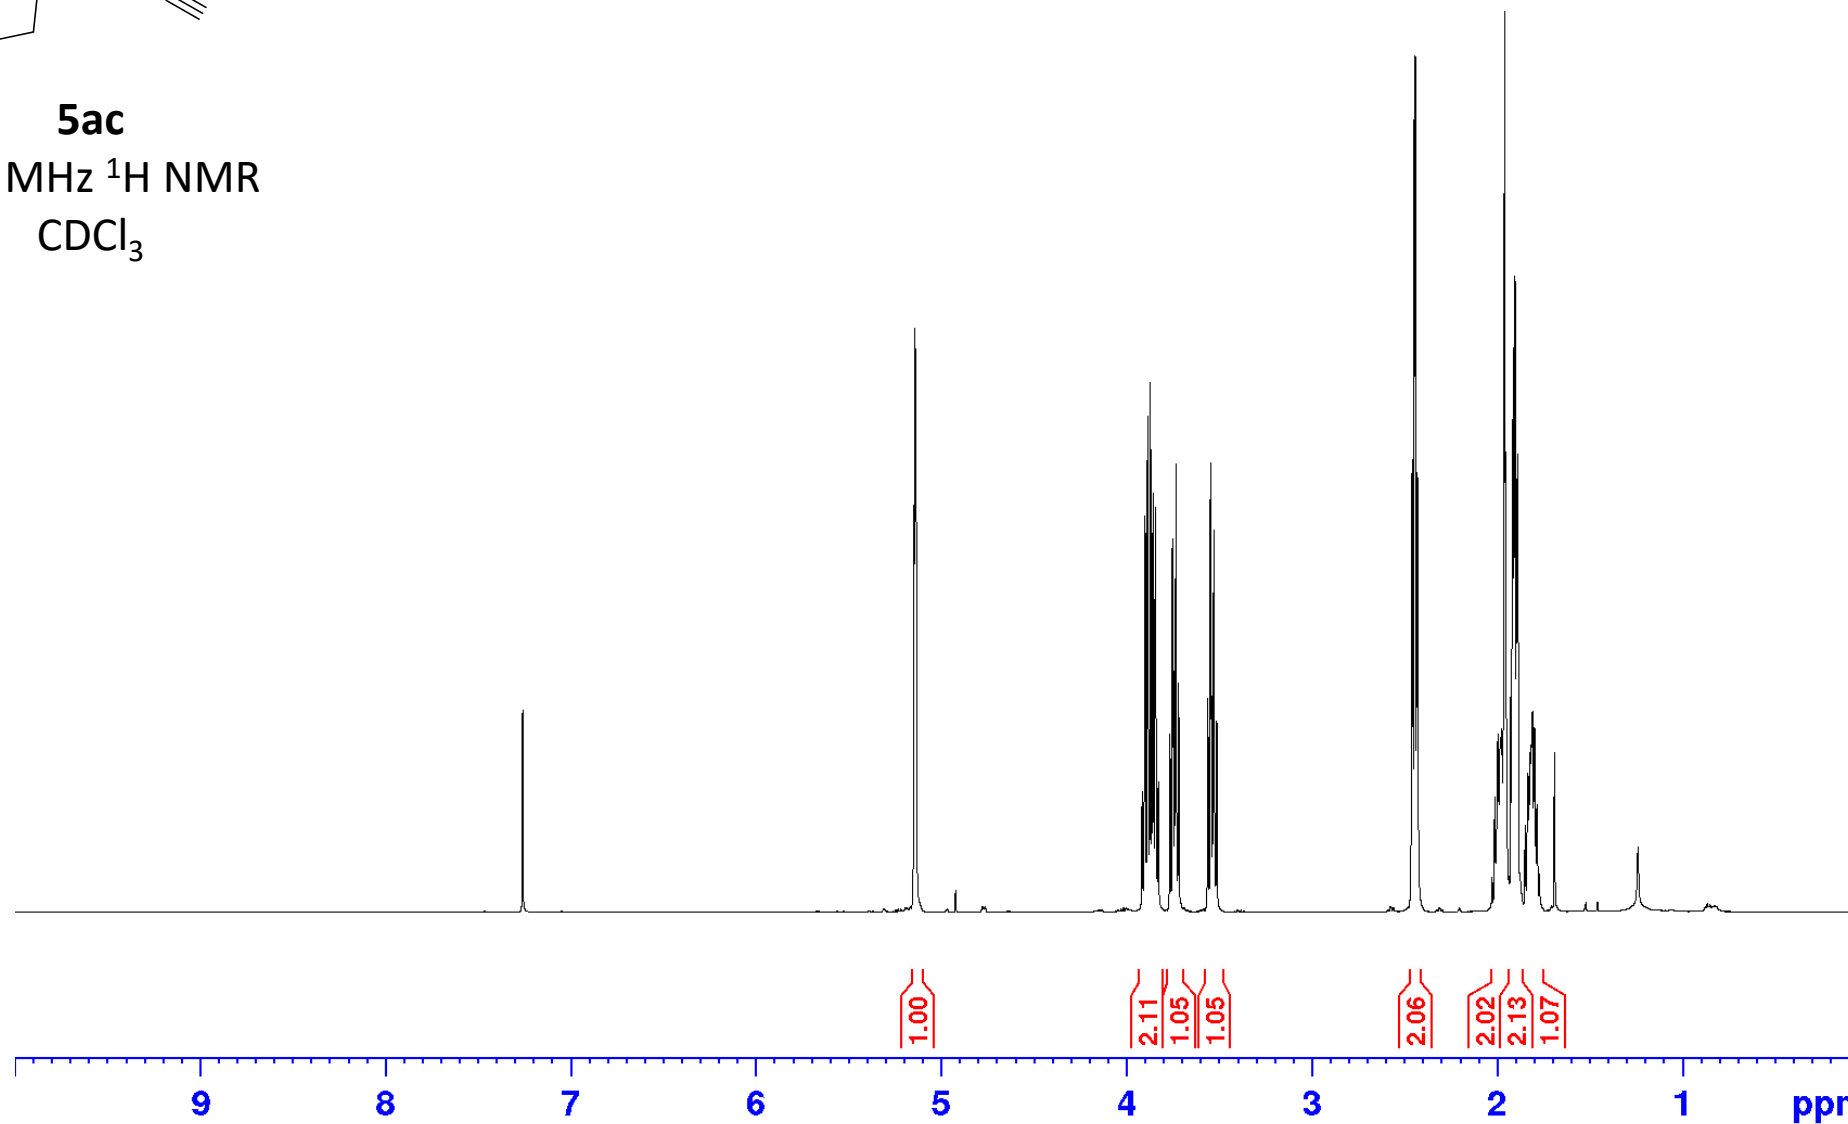

Current Data Parameters  
NAME vinn-4-149-11-ialt-2020013  
EXPNO 1  
PROCNO 1

F2 - Acquisition Parameters  
Date\_ 20210130  
Time 18.31 h  
INSTRUM spect  
PROBHD z119470\_0283 {  
PULPROG zg30  
TD 65536  
SOLVENT cdcl3  
NS 16  
DS 2  
SWH 10000.000 Hz  
FIDRES 0.305176 Hz  
AQ 3.2767999 sec  
RG 56.83  
DW 50.000 usec  
DE 6.50 usec  
TE 295.2 K  
D1 1.00000000 sec  
TD0 1  
SFO1 500.1330883 MHz  
NUC1 1H  
P1 10.91 usec  
PLW1 25.00000000 W

F2 - Processing parameters  
SI 65536  
SF 500.1300123 MHz  
WDW EM  
SSB 0  
LB 0.30 Hz  
GB 0  
PC 1.00



**5ac**  
125 MHz  $^{13}\text{C}$  NMR  
 $\text{CDCl}_3$

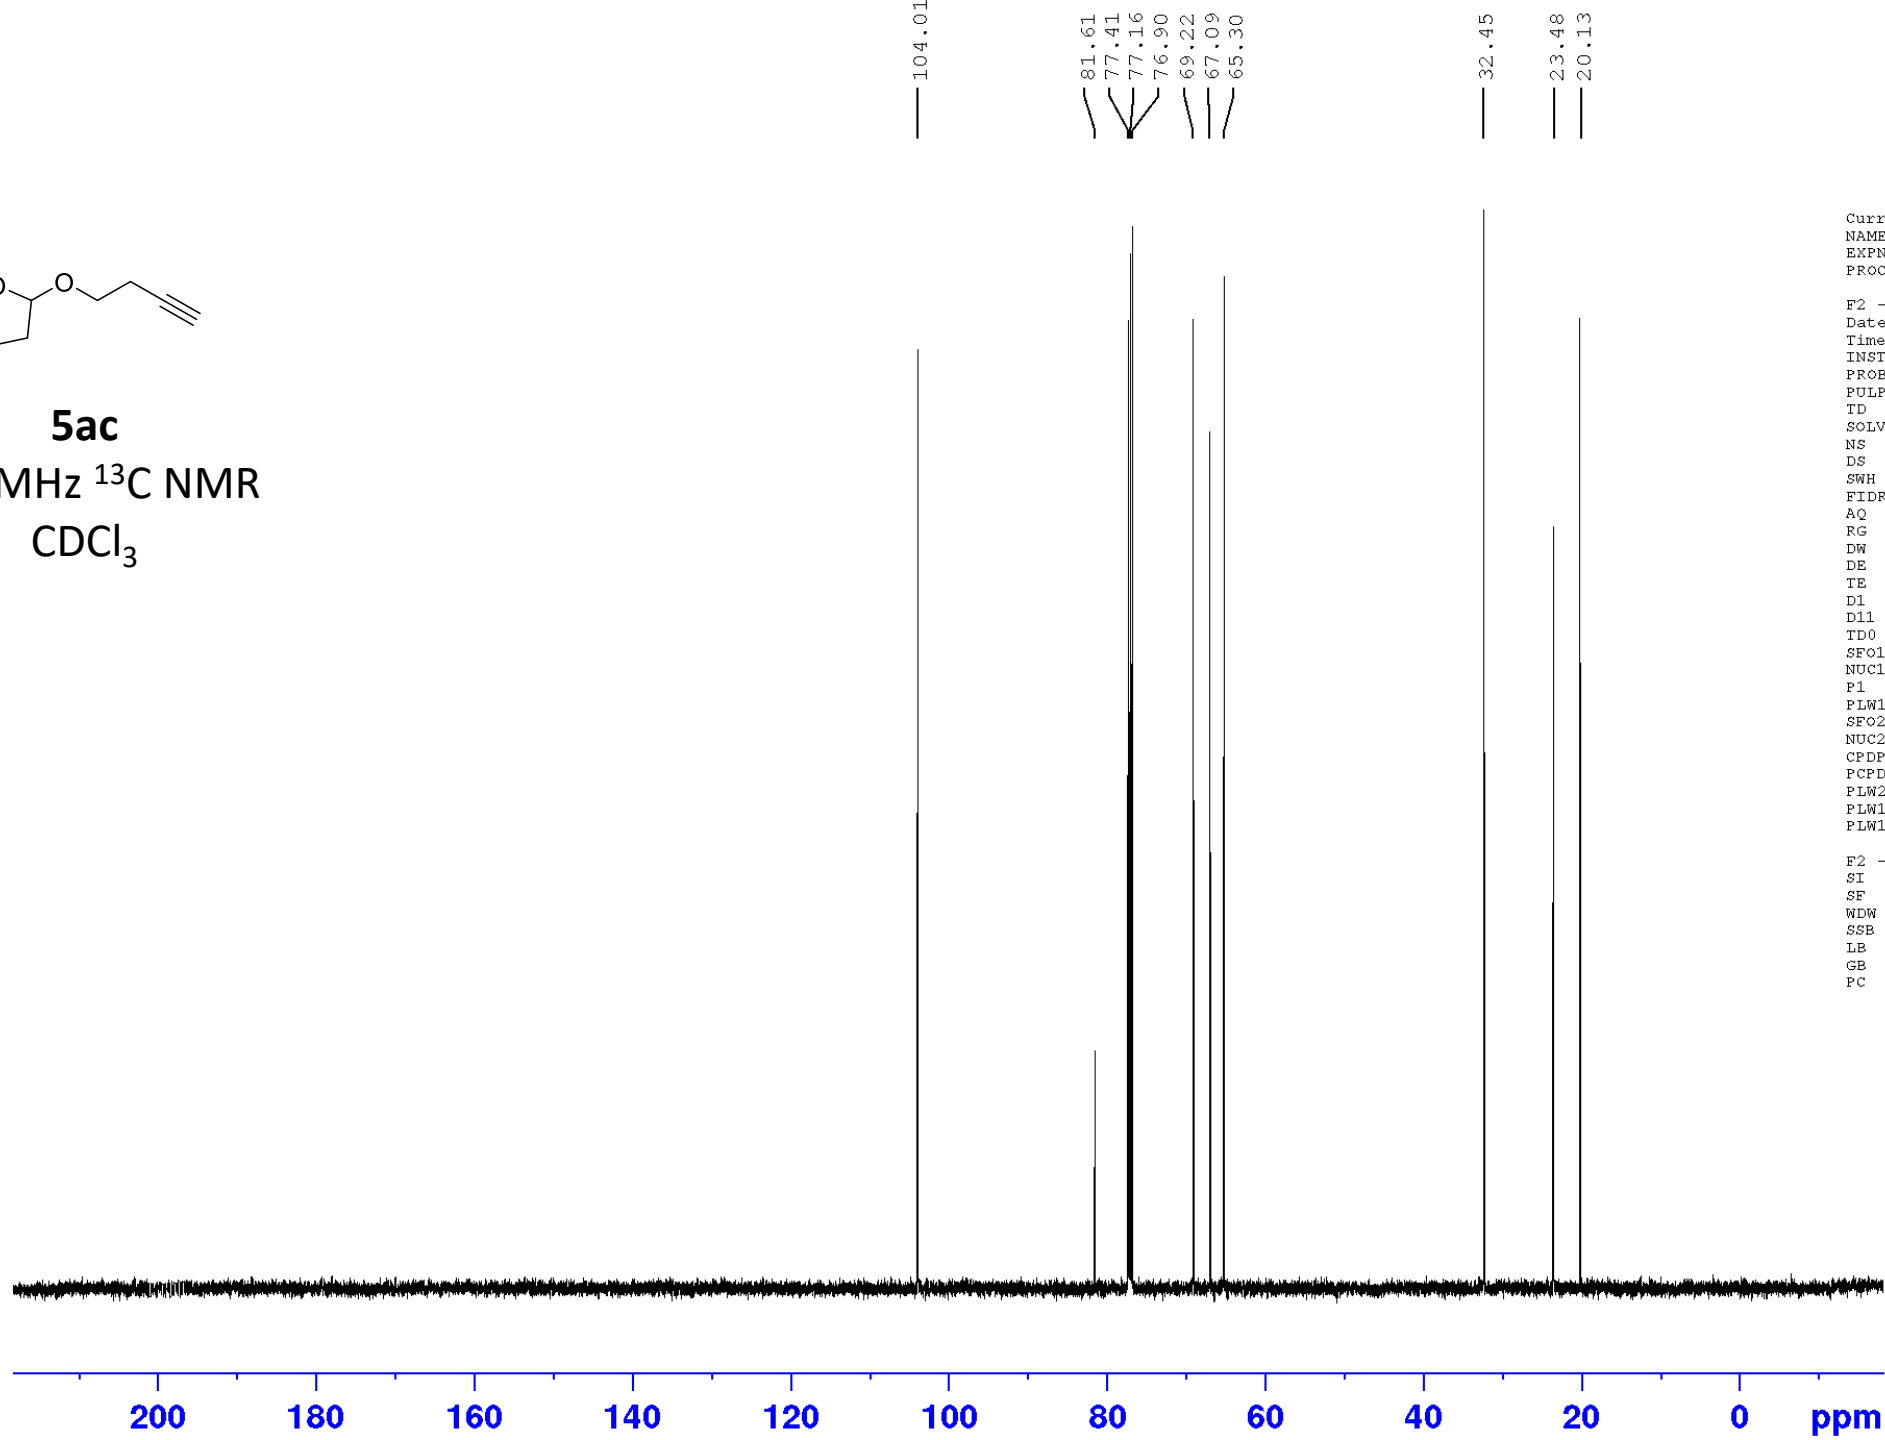

Current Data Parameters  
NAME vinn-4-149-11-islt-20200130  
EXPNO 2  
PROCNO 1

F2 - Acquisition Parameters  
Date\_ 20210130  
Time 18.38 h  
INSTRUM spect  
PROBHD Z119470\_0283 (  
PULPROG zgpg30  
TD 65536  
SOLVENT CDCl3  
NS 128  
DS 4  
SWH 29761.904 Hz  
FIDRES 0.908261 Hz  
AQ 1.1010048 sec  
RG 206.72  
DW 16.800 usec  
DE 6.50 usec  
TE 295.2 K  
D1 2.0000000 sec  
D11 0.0300000 sec  
TD0 1  
SFO1 125.7703643 MHz  
NUC1 13C  
P1 9.75 usec  
PLW1 94.0000000 W  
SFO2 500.1320005 MHz  
NUC2 1H  
CPDPRG[2] waltz16  
PCPD2 80.00 usec  
PLW2 25.0000000 W  
PLW12 0.46495000 W  
PLW13 0.23387000 W

F2 - Processing parameters  
SI 32768  
SF 125.7577747 MHz  
WDW EM  
SSB 0  
LB 1.00 Hz  
GB 0  
PC 1.40

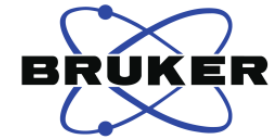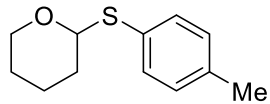

**6a**

400 MHz <sup>1</sup>H NMR  
CDCl<sub>3</sub>

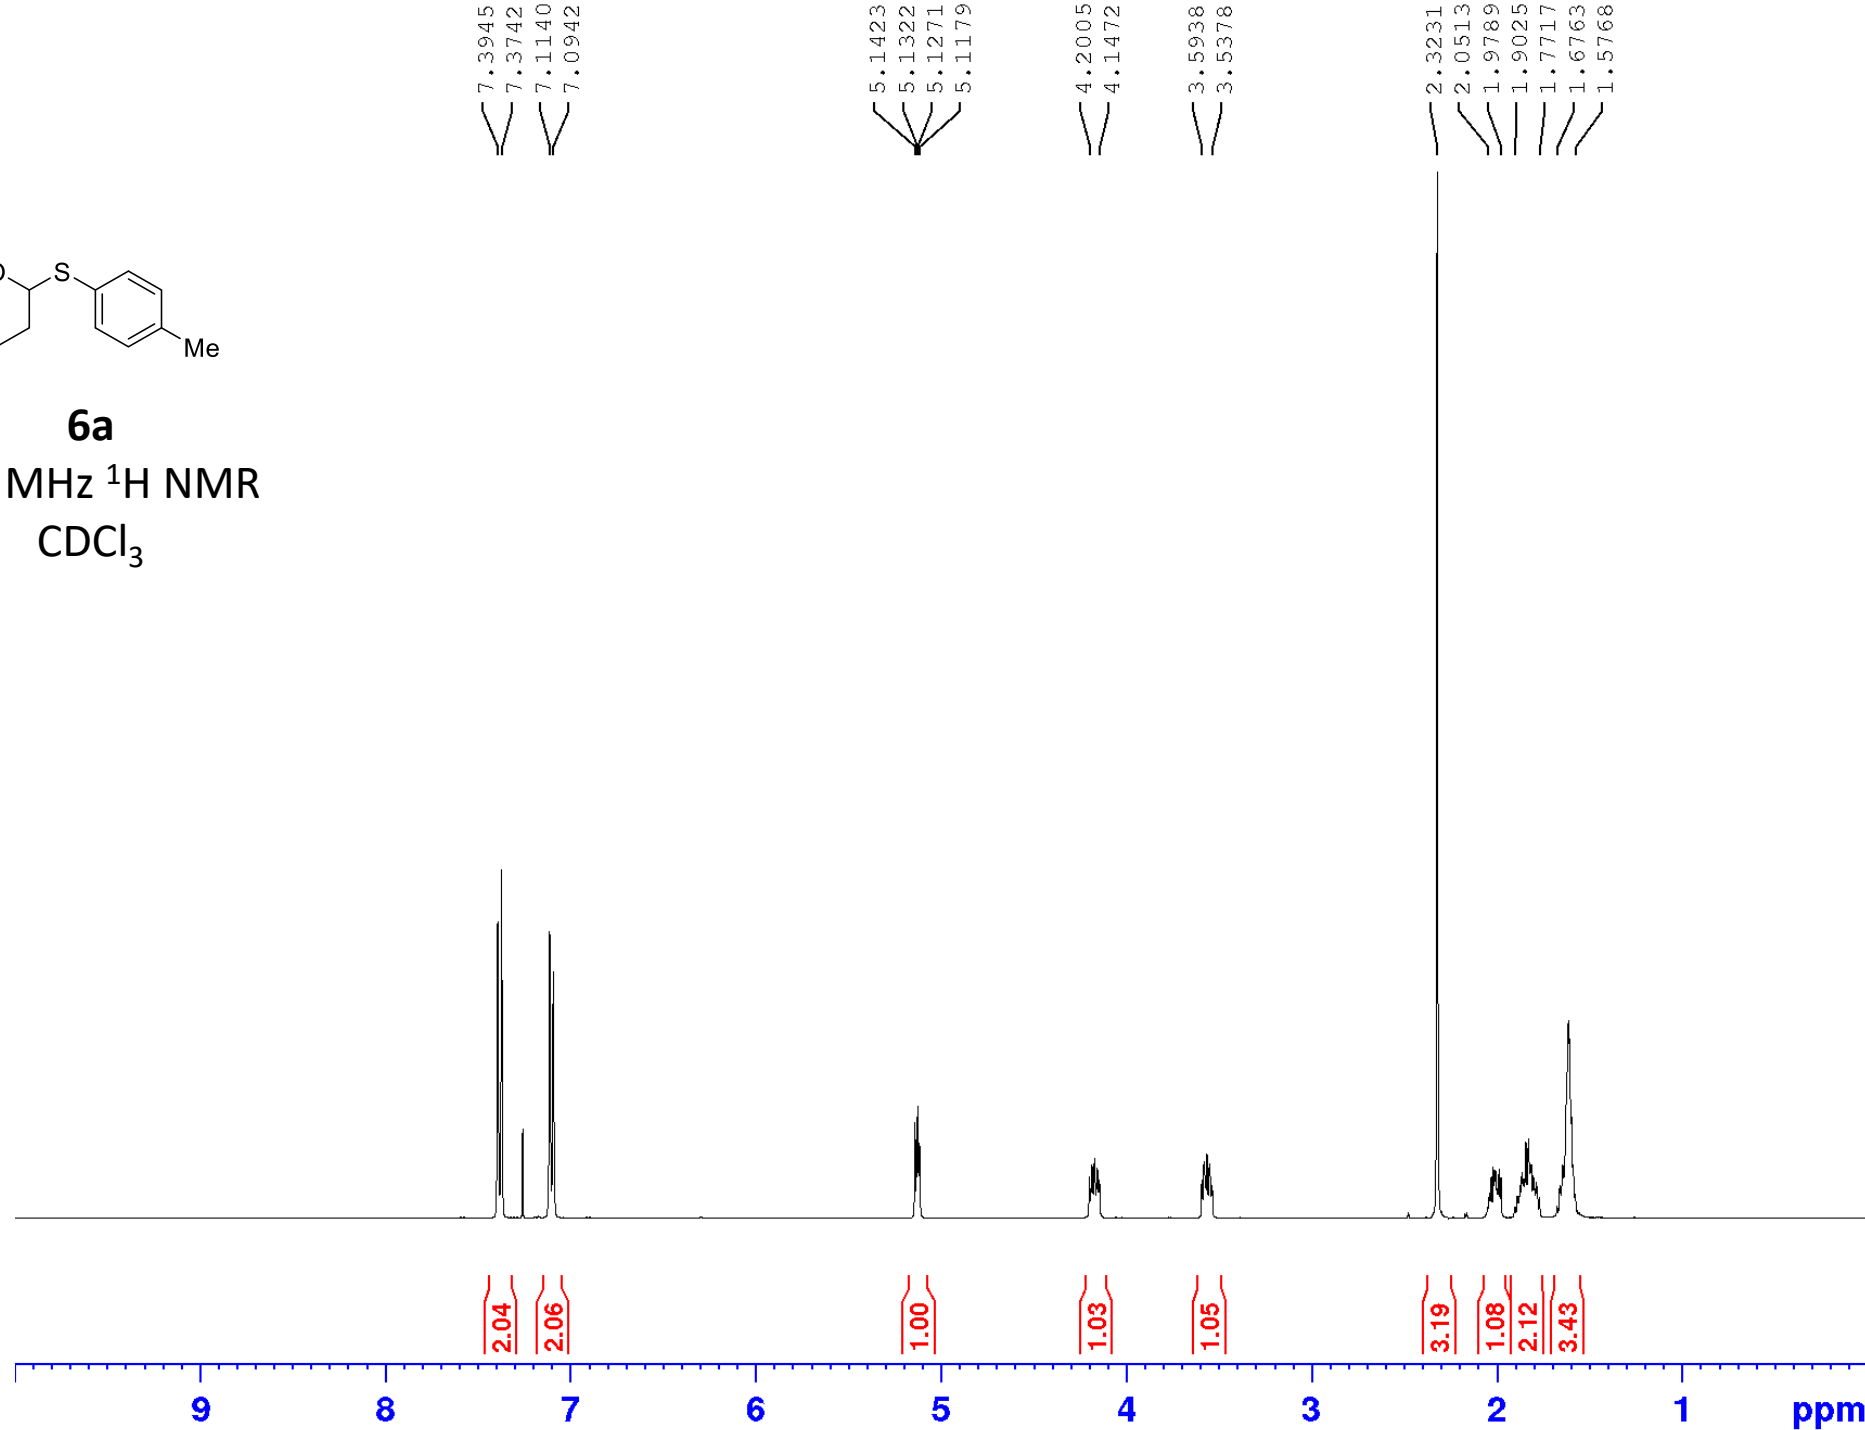

Current Data Parameters  
NAME Andy-1-181-1-1s1t-2-20220812  
EXPNO 4  
PROCNO 1

F2 - Acquisition Parameters

Date\_ 20220812  
Time 18.56 h  
INSTRUM spect  
PROBHD E108618\_0257 (   
PULPROG zg30  
TD 65536  
SOLVENT CDCl3  
NS 16  
DS 2  
SWH 8012.820 Hz  
FIDRES 0.244532 Hz  
AQ 4.0894465 sec  
RG 114  
DW 62.400 usec  
DE 6.50 usec  
TE 295.6 K  
D1 1.00000000 sec  
TD0 1  
SFO1 400.1324708 MHz  
NUC1 1H  
P1 15.00 usec  
PLW1 12.50000000 W

F2 - Processing parameters

SI 65536  
SF 400.1300098 MHz  
WDW EM  
SSB 0  
LB 0.30 Hz  
GB 0  
PC 1.00



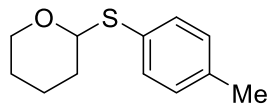

**6a**

100 MHz <sup>13</sup>C NMR  
CDCl<sub>3</sub>

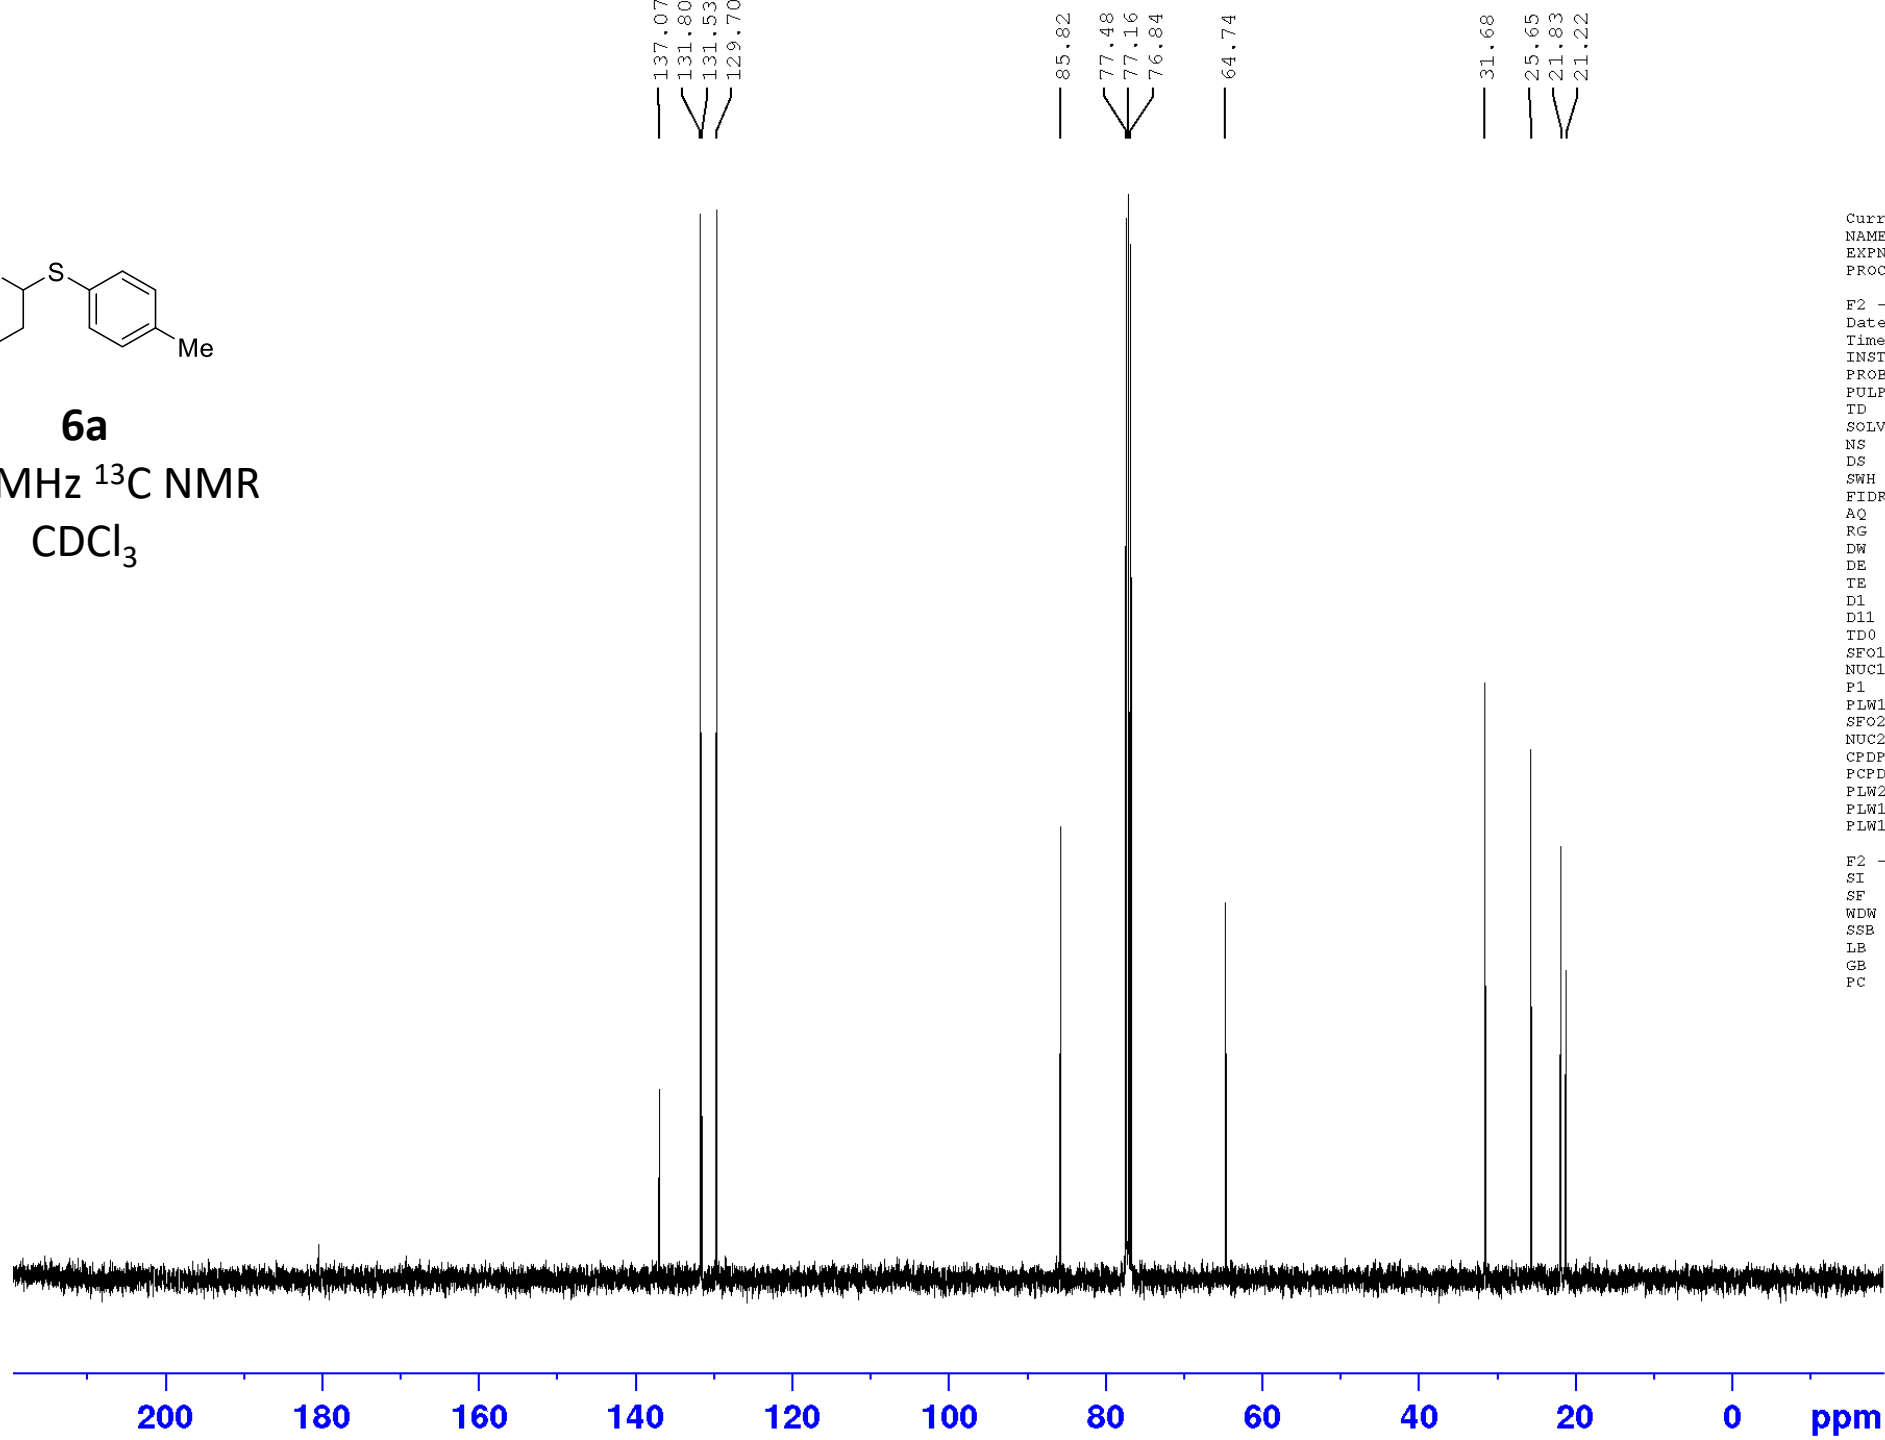

Current Data Parameters  
NAME Andy-1-181-1-isl-2-20220812  
EXPNO 5  
PROCNO 1

F2 - Acquisition Parameters  
Date\_ 20220812  
Time 19.04 h  
INSTRUM spect  
PROBHD Z108618\_0257 (  
PULPROG zgpg30  
TD 65536  
SOLVENT CDCl3  
NS 102  
DS 4  
SWH 24038.461 Hz  
FIDRES 0.733596 Hz  
AQ 1.3631488 sec  
RG 203  
DW 20.800 usec  
DE 6.50 usec  
TE 296.0 K  
D1 2.0000000 sec  
D11 0.03000000 sec  
TD0 1  
SFO1 100.6228298 MHz  
NUC1 13C  
P1 10.00 usec  
PLW1 51.0000000 W  
SFO2 400.1316005 MHz  
NUC2 1H  
CPDPRG[2] waltz16  
PCPD2 90.00 usec  
PLW2 12.5000000 W  
PLW12 0.34722000 W  
PLW13 0.17465000 W

F2 - Processing parameters  
SI 32768  
SF 100.6127579 MHz  
WDW EM  
SSB 0  
LB 1.00 Hz  
GB 0  
PC 1.40

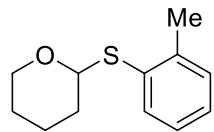

**6b**

400 MHz <sup>1</sup>H NMR  
CDCl<sub>3</sub>

7.5550  
7.5354  
7.1803  
7.1007  
5.2267  
5.2167  
5.2121  
5.2028  
4.1972  
4.1426  
3.6312  
3.5755  
2.3969  
2.0942  
2.0186  
1.9474  
1.8416  
1.7057  
1.5936

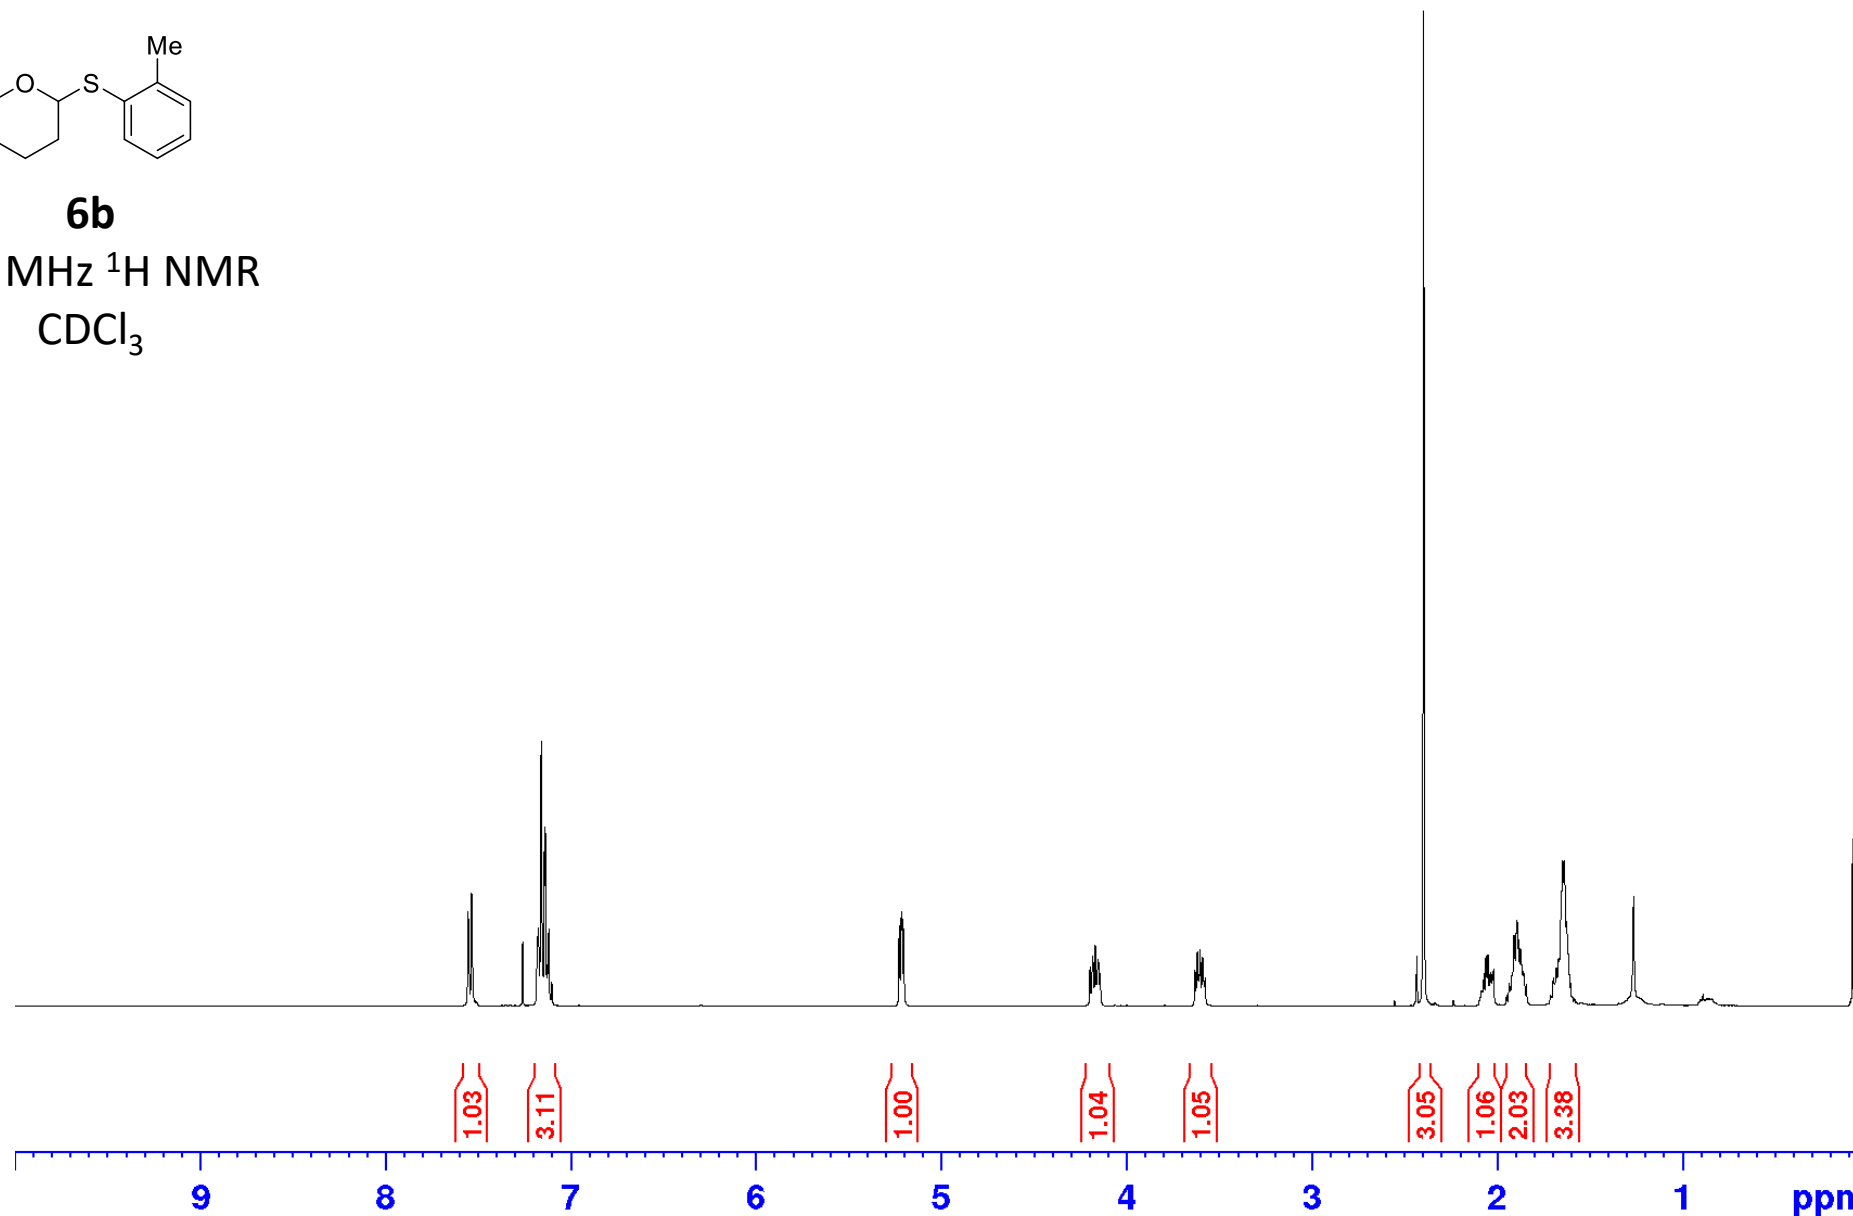

Current Data Parameters  
NAME Andy-181-4-isl-20220817  
EXPNO 4  
PROCNO 1

F2 - Acquisition Parameters  
Date\_ 20220817  
Time 19.08 h  
INSTRUM spect  
PROBHD Z108618\_0257 (   
PULPROG zg30  
TD 65536  
SOLVENT CDCl3  
NS 16  
DS 2  
SWH 8012.820 Hz  
FIDRES 0.244532 Hz  
AQ 4.0894465 sec  
RG 90.5  
DW 62.400 usec  
DE 6.50 usec  
TE 295.6 K  
D1 1.00000000 sec  
TDO 1  
SFO1 400.1324708 MHz  
NUC1 1H  
P1 15.00 usec  
PLW1 12.50000000 W

F2 - Processing parameters  
SI 65536  
SF 400.1300108 MHz  
WDW EM  
SSB 0  
LB 0.30 Hz  
GB 0  
PC 1.00

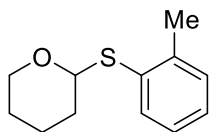

**6b**

100 MHz <sup>13</sup>C NMR  
CDCl<sub>3</sub>

138.29  
135.08  
130.42  
130.10  
126.60  
126.57

84.62

64.74

31.93

25.65

21.82

20.86

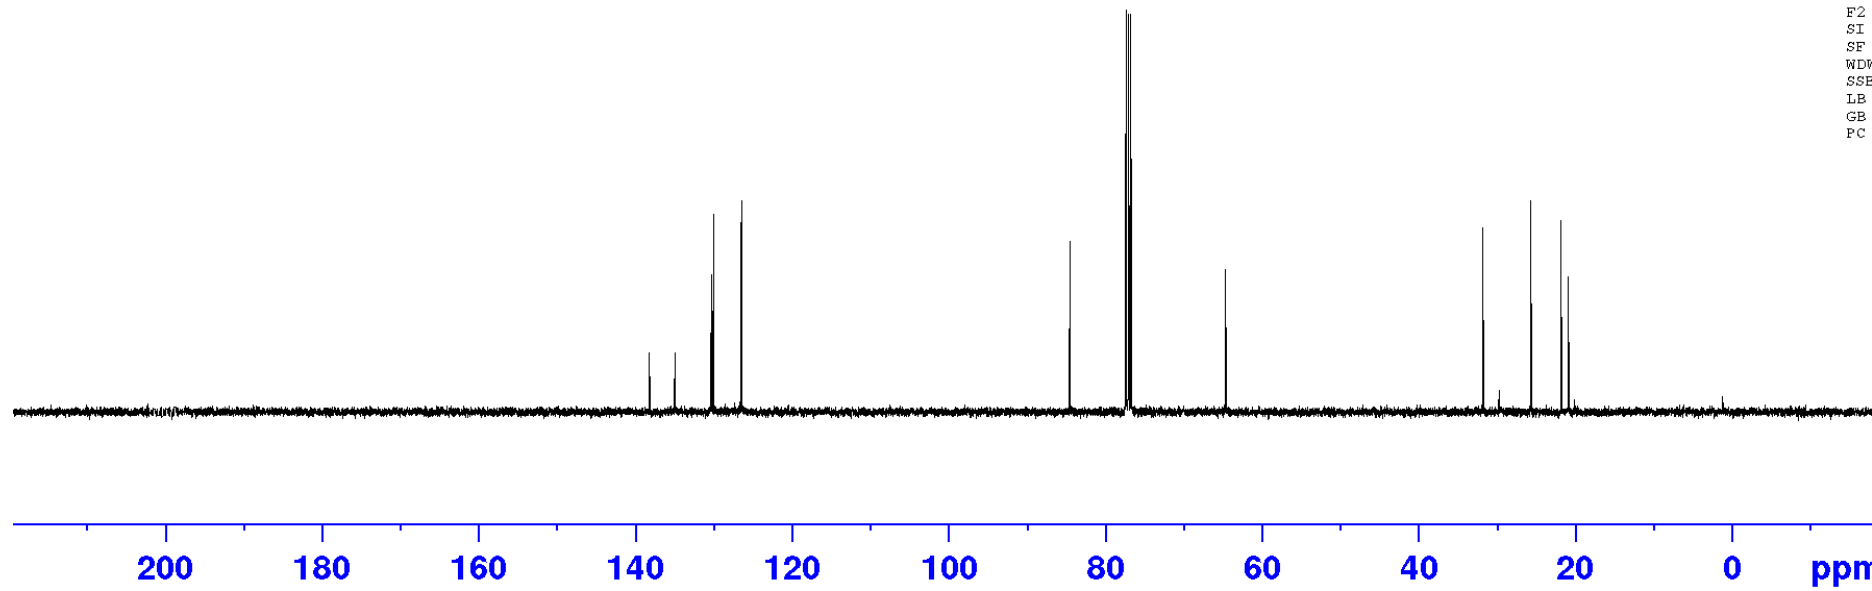

Current Data Parameters  
NAME Andy-181-4-isl-20220817  
EXPNO 5  
PROCNO 1

F2 - Acquisition Parameters  
Date\_ 20220817  
Time 19.17 h  
INSTRUM spect  
PROBHD Z108618\_0257 ( )  
PULPROG zgpg30  
TD 65536  
SOLVENT CDCl3  
NS 106  
DS 4  
SWH 24038.461 Hz  
FIDRES 0.733596 Hz  
AQ 1.3631488 sec  
RG 203  
DW 20.800 usec  
DE 6.50 usec  
TE 296.3 K  
D1 2.0000000 sec  
D11 0.0300000 sec  
TD0 1  
SFO1 100.6228298 MHz  
NUC1 13C  
P1 10.00 usec  
PLW1 51.0000000 W  
SFO2 400.1316005 MHz  
NUC2 1H  
CPDPRG[2] waltz16  
PCPD2 90.00 usec  
PLW2 12.5000000 W  
PLW12 0.34722000 W  
PLW13 0.17465000 W

F2 - Processing parameters  
SI 32768  
SF 100.6127582 MHz  
WDW EM  
SSB 0  
LB 1.00 Hz  
GB 0  
PC 1.40

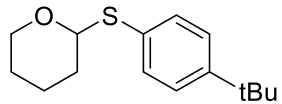

**6c**

400 MHz <sup>1</sup>H NMR  
CDCl<sub>3</sub>

7.4266  
7.4054  
7.3226  
7.3014  
5.1853  
5.1613  
4.2144  
4.1611  
3.6096  
3.5539  
2.0627  
1.9879  
1.9067  
1.7877  
1.6814  
1.5846  
1.3026

Current Data Parameters  
NAME Andy-181-3-isl1-20220817  
EXPNO 2  
PROCNO 1

F2 - Acquisition Parameters  
Date\_ 20220817  
Time 18.55 h  
INSTRUM spect  
PROBHD Z108618\_0257 (   
PULPROG zg30  
TD 65536  
SOLVENT CDCl3  
NS 16  
DS 2  
SWH 8012.820 Hz  
FIDRES 0.244532 Hz  
AQ 4.0894465 sec  
RG 114  
DW 62.400 usec  
DE 6.50 usec  
TE 295.5 K  
D1 1.00000000 sec  
TDO 1  
SFO1 400.1324708 MHz  
NUC1 1H  
P1 15.00 usec  
PLW1 12.50000000 W

F2 - Processing parameters  
SI 65536  
SF 400.1300108 MHz  
WDW EM  
SSB 0  
LB 0.30 Hz  
GB 0  
PC 1.00

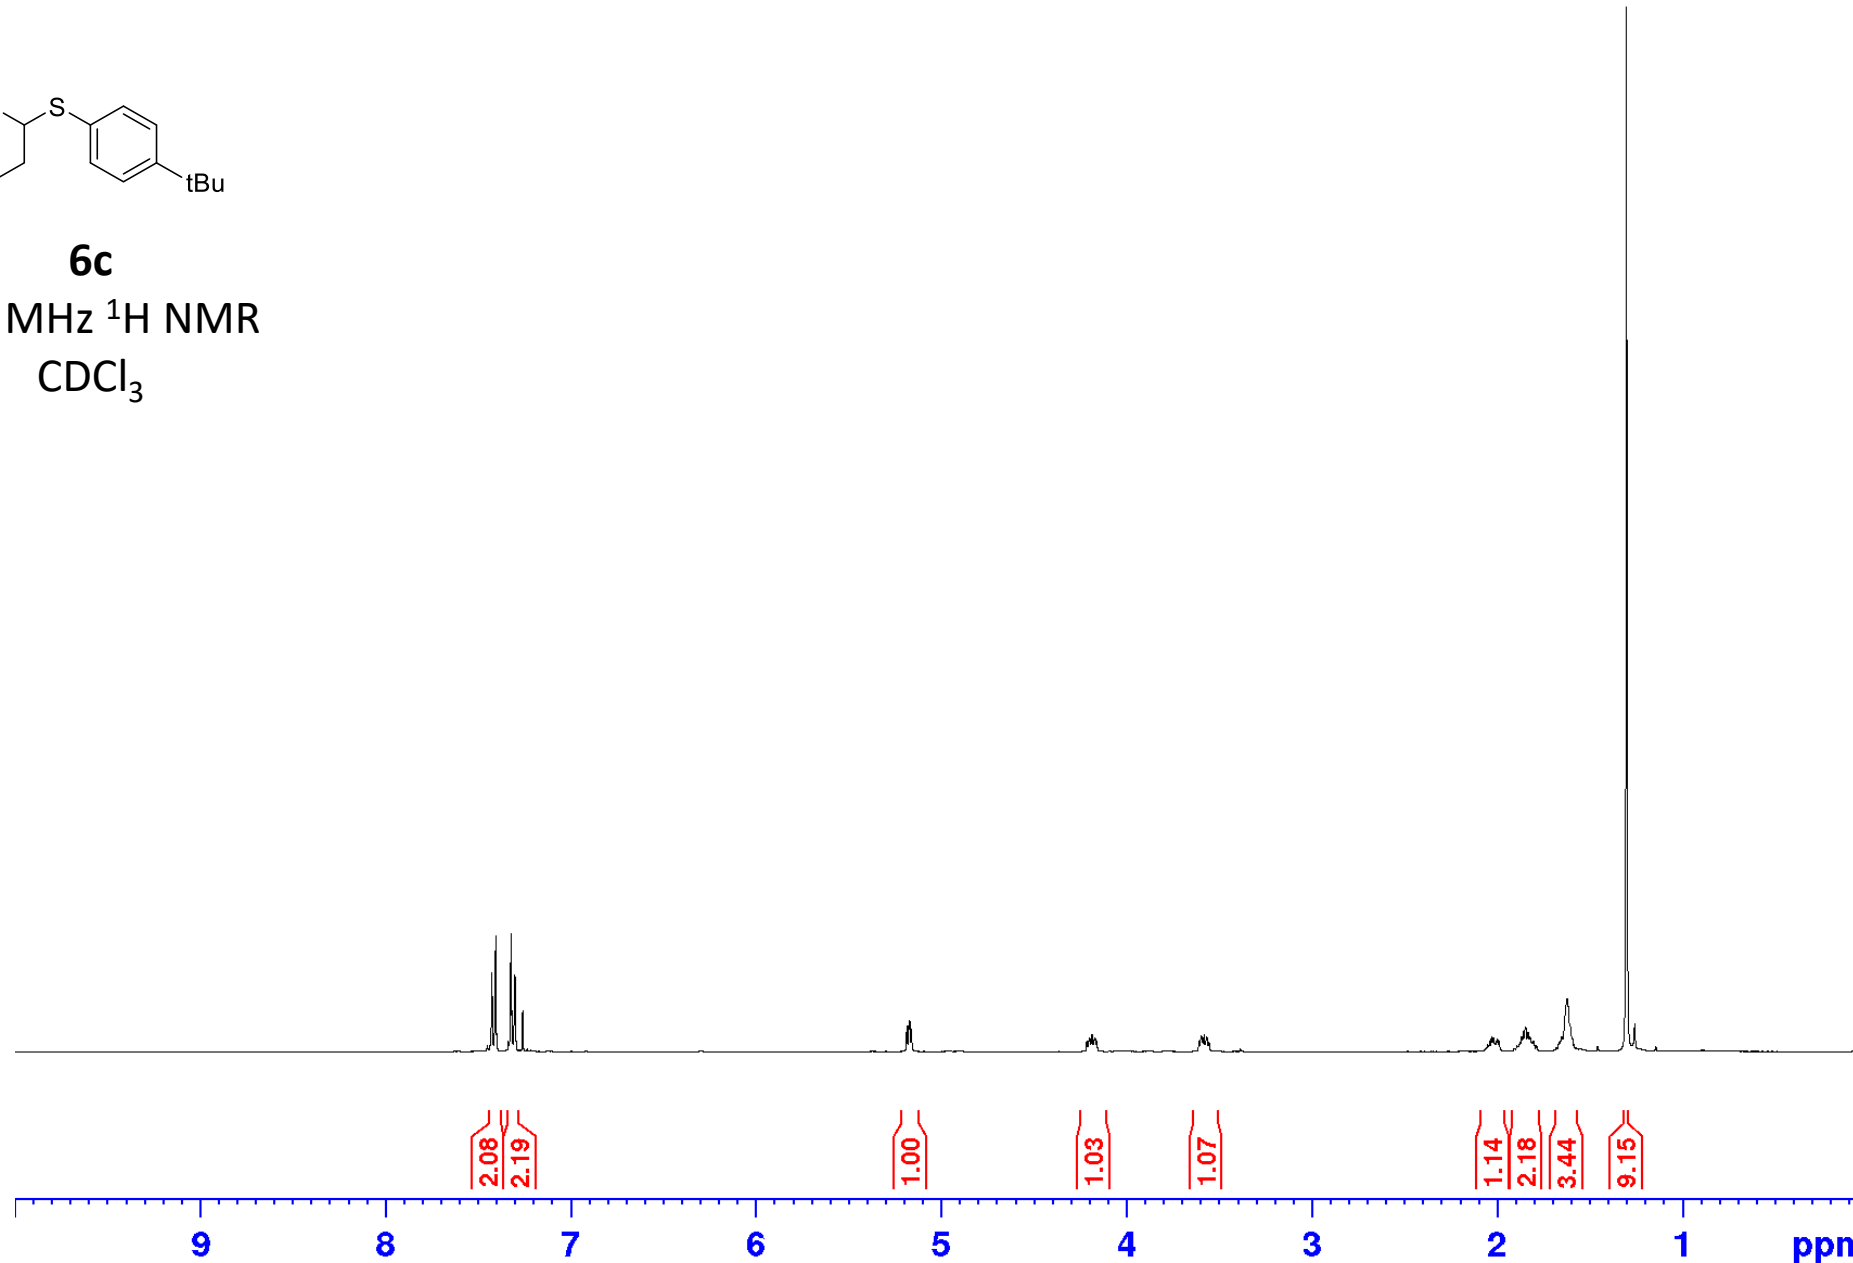

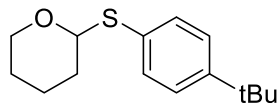

**6c**

100 MHz <sup>13</sup>C NMR  
CDCl<sub>3</sub>

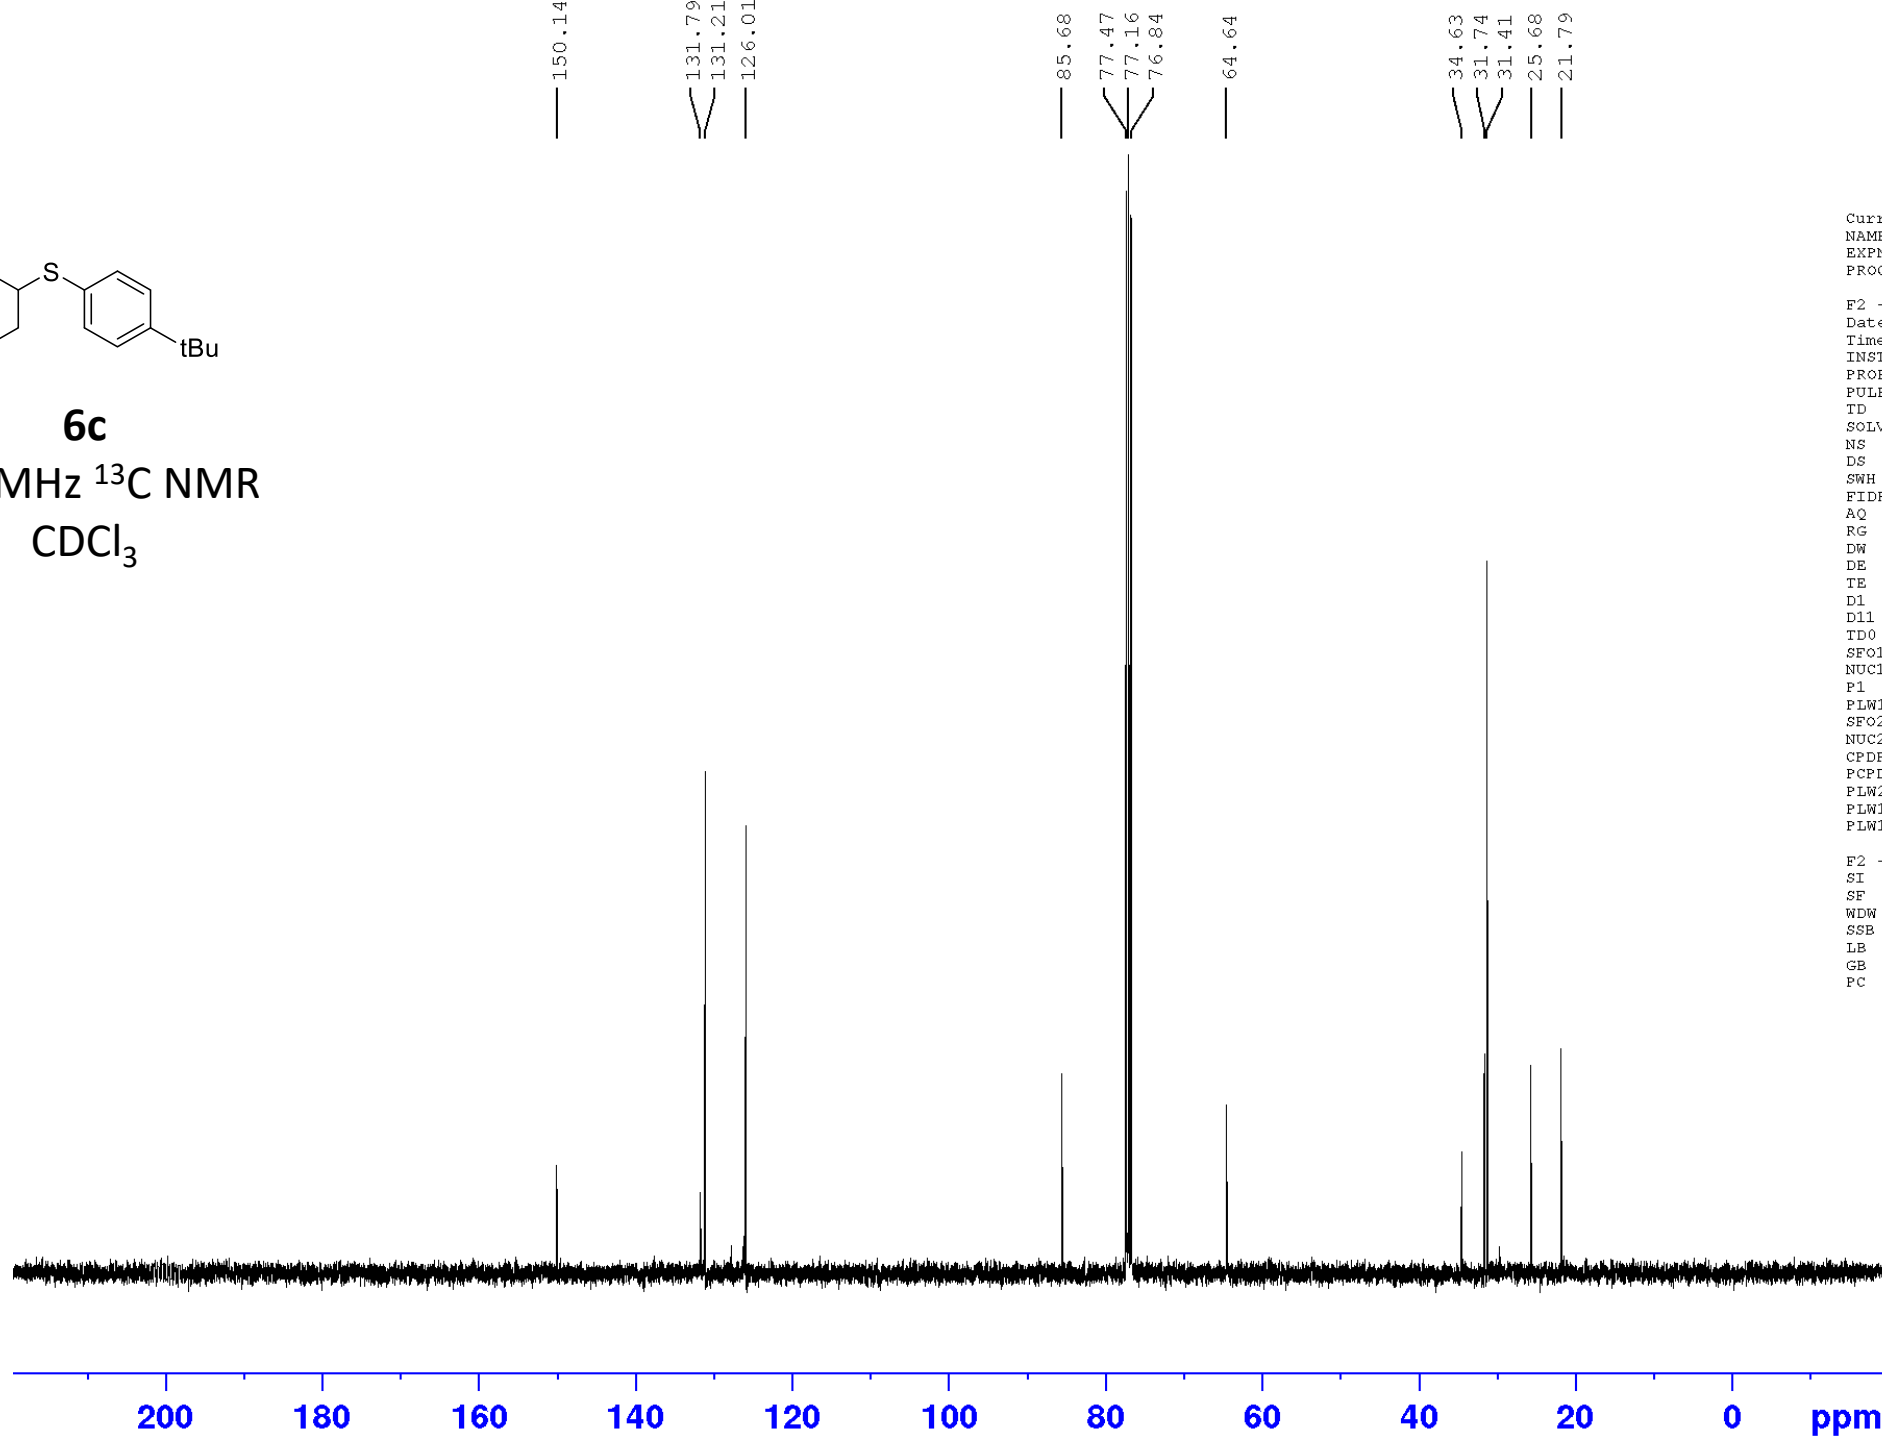

Current Data Parameters  
NAME Andy-181-3-isl-20220817  
EXPNO 3  
PROCNO 1

F2 - Acquisition Parameters  
Date\_ 20220817  
Time 19.03 h  
INSTRUM spect  
PROBHD Z108618\_0257 (  
PULPROG zgpg30  
TD 65536  
SOLVENT CDCl3  
NS 104  
DS 4  
SWH 24038.461 Hz  
FIDRES 0.733596 Hz  
AQ 1.3631488 sec  
RG 203  
DW 20.800 usec  
DE 6.50 usec  
TE 296.2 K  
D1 2.0000000 sec  
D11 0.0300000 sec  
TD0 1  
SFO1 100.6228298 MHz  
NUC1 13C  
P1 10.00 usec  
PLW1 51.0000000 W  
SFO2 400.1316005 MHz  
NUC2 1H  
CPDPRG[2] waltz16  
PCPD2 90.00 usec  
PLW2 12.5000000 W  
PLW12 0.34722000 W  
PLW13 0.17465000 W

F2 - Processing parameters  
SI 32768  
SF 100.6127564 MHz  
WDW EM  
SSB 0  
LB 1.00 Hz  
GB 0  
PC 1.40

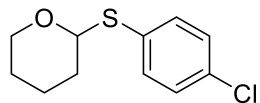

**6d**  
500 MHz <sup>1</sup>H NMR  
CDCl<sub>3</sub>

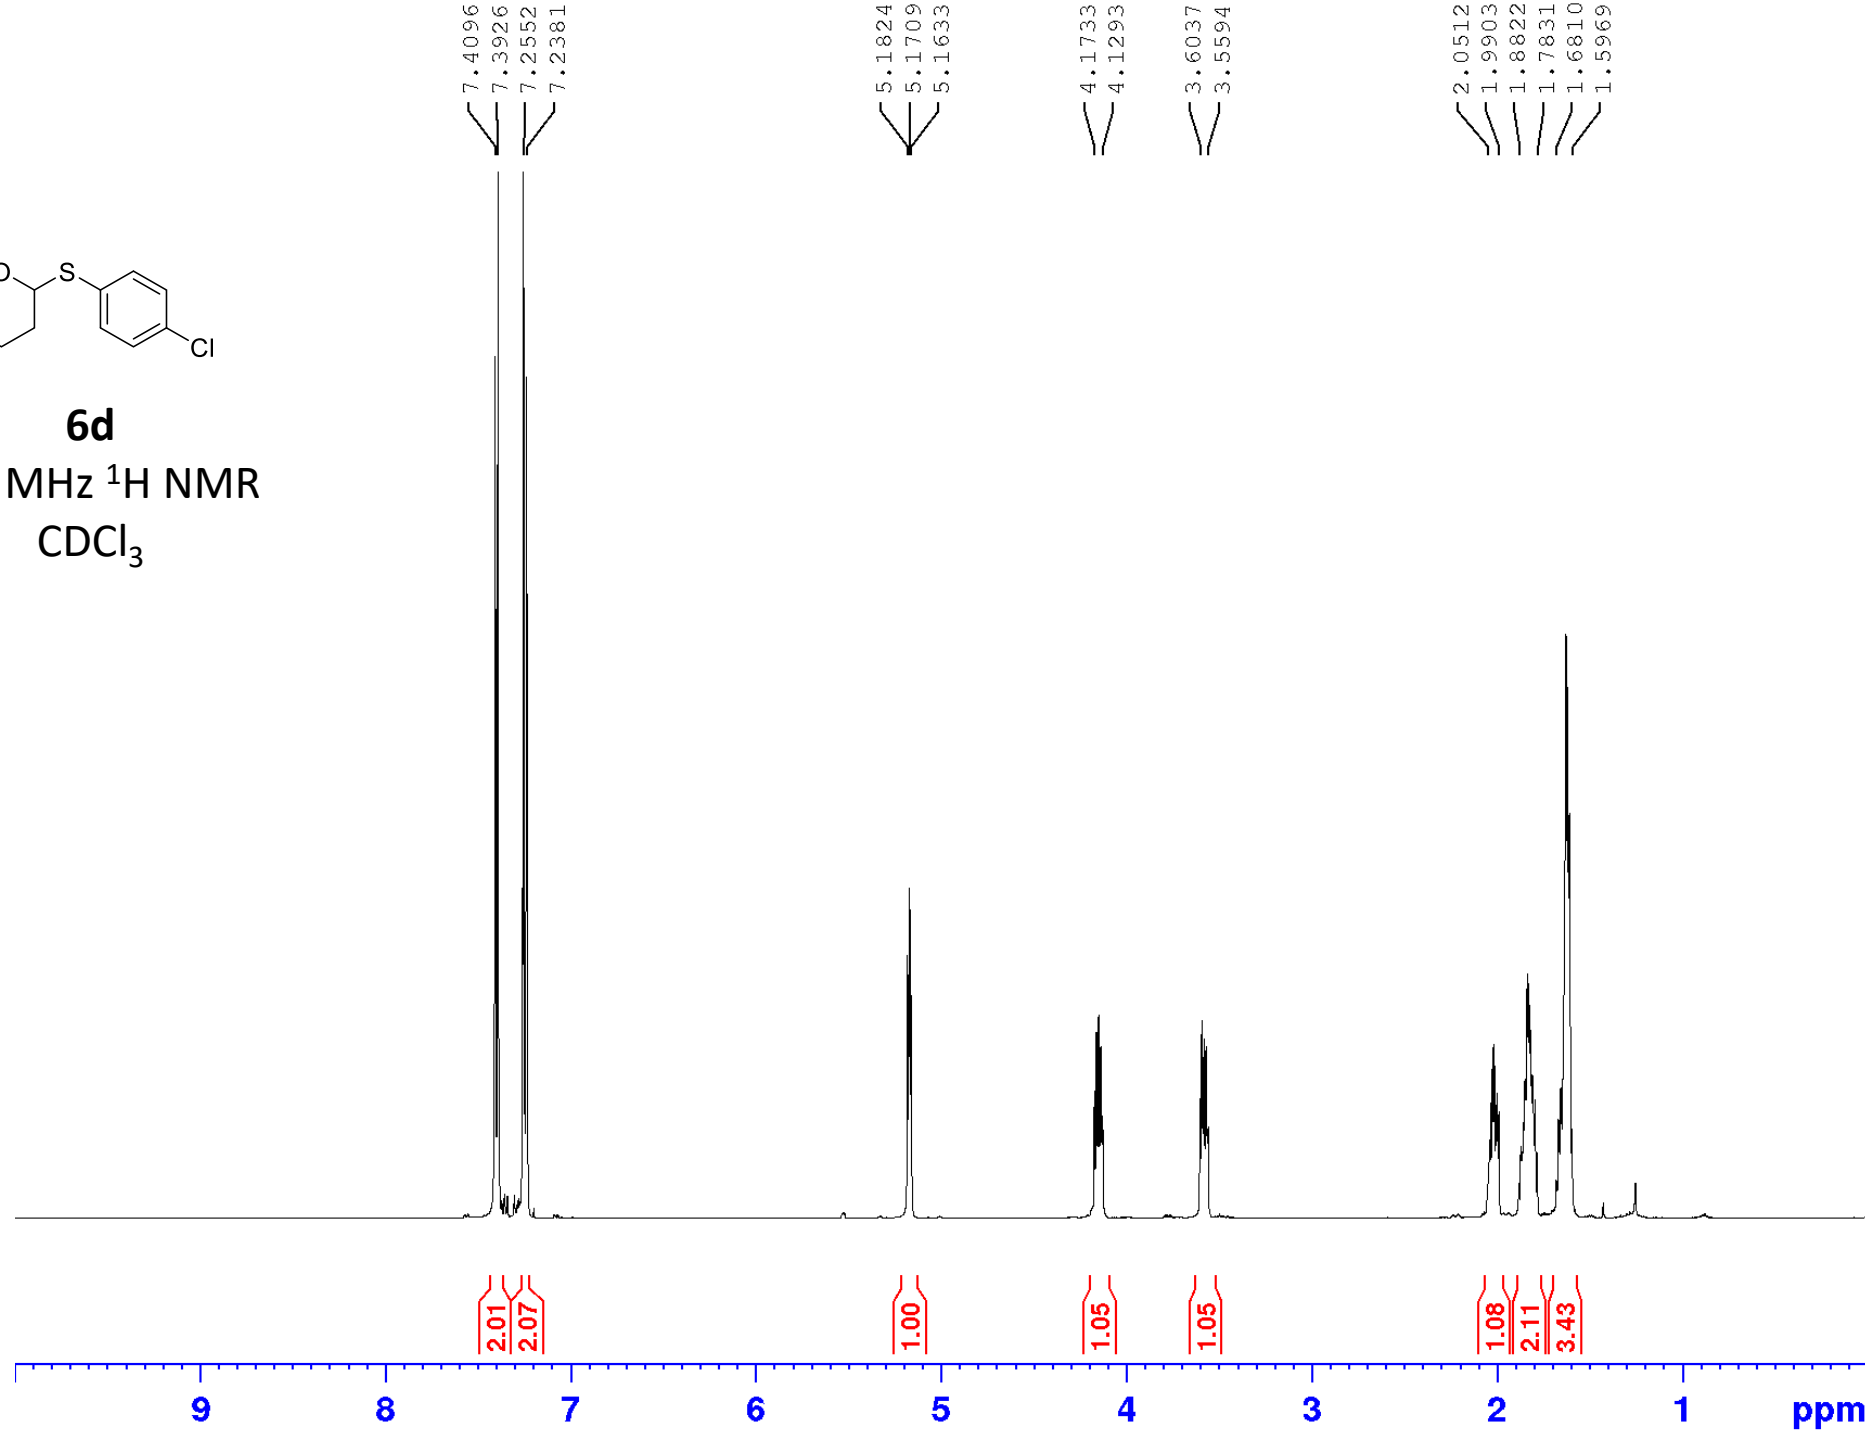

Current Data Parameters  
NAME vinn-4-190-4-ialt-20230104  
EXPNO 1  
PROCNO 1

F2 - Acquisition Parameters  
Date\_ 20230104  
Time 15.31 h  
INSTRUM spect  
PROBHD z119470\_0283 {  
PULPROG zg30  
TD 65536  
SOLVENT cdcl3  
NS 16  
DS 2  
SWH 10000.000 Hz  
FIDRES 0.305176 Hz  
AQ 3.2767999 sec  
RG 63.76  
DW 50.000 usec  
DE 6.50 usec  
TE 295.1 K  
D1 1.00000000 sec  
TD0 1  
SFO1 500.1330883 MHz  
NUC1 1H  
P1 10.91 usec  
PLW1 25.00000000 W

F2 - Processing parameters  
SI 65536  
SF 500.1300120 MHz  
WDW EM  
SSB 0  
LB 0.30 Hz  
GB 0  
PC 1.00

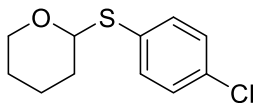

**6d**

125 MHz <sup>13</sup>C NMR  
CDCl<sub>3</sub>

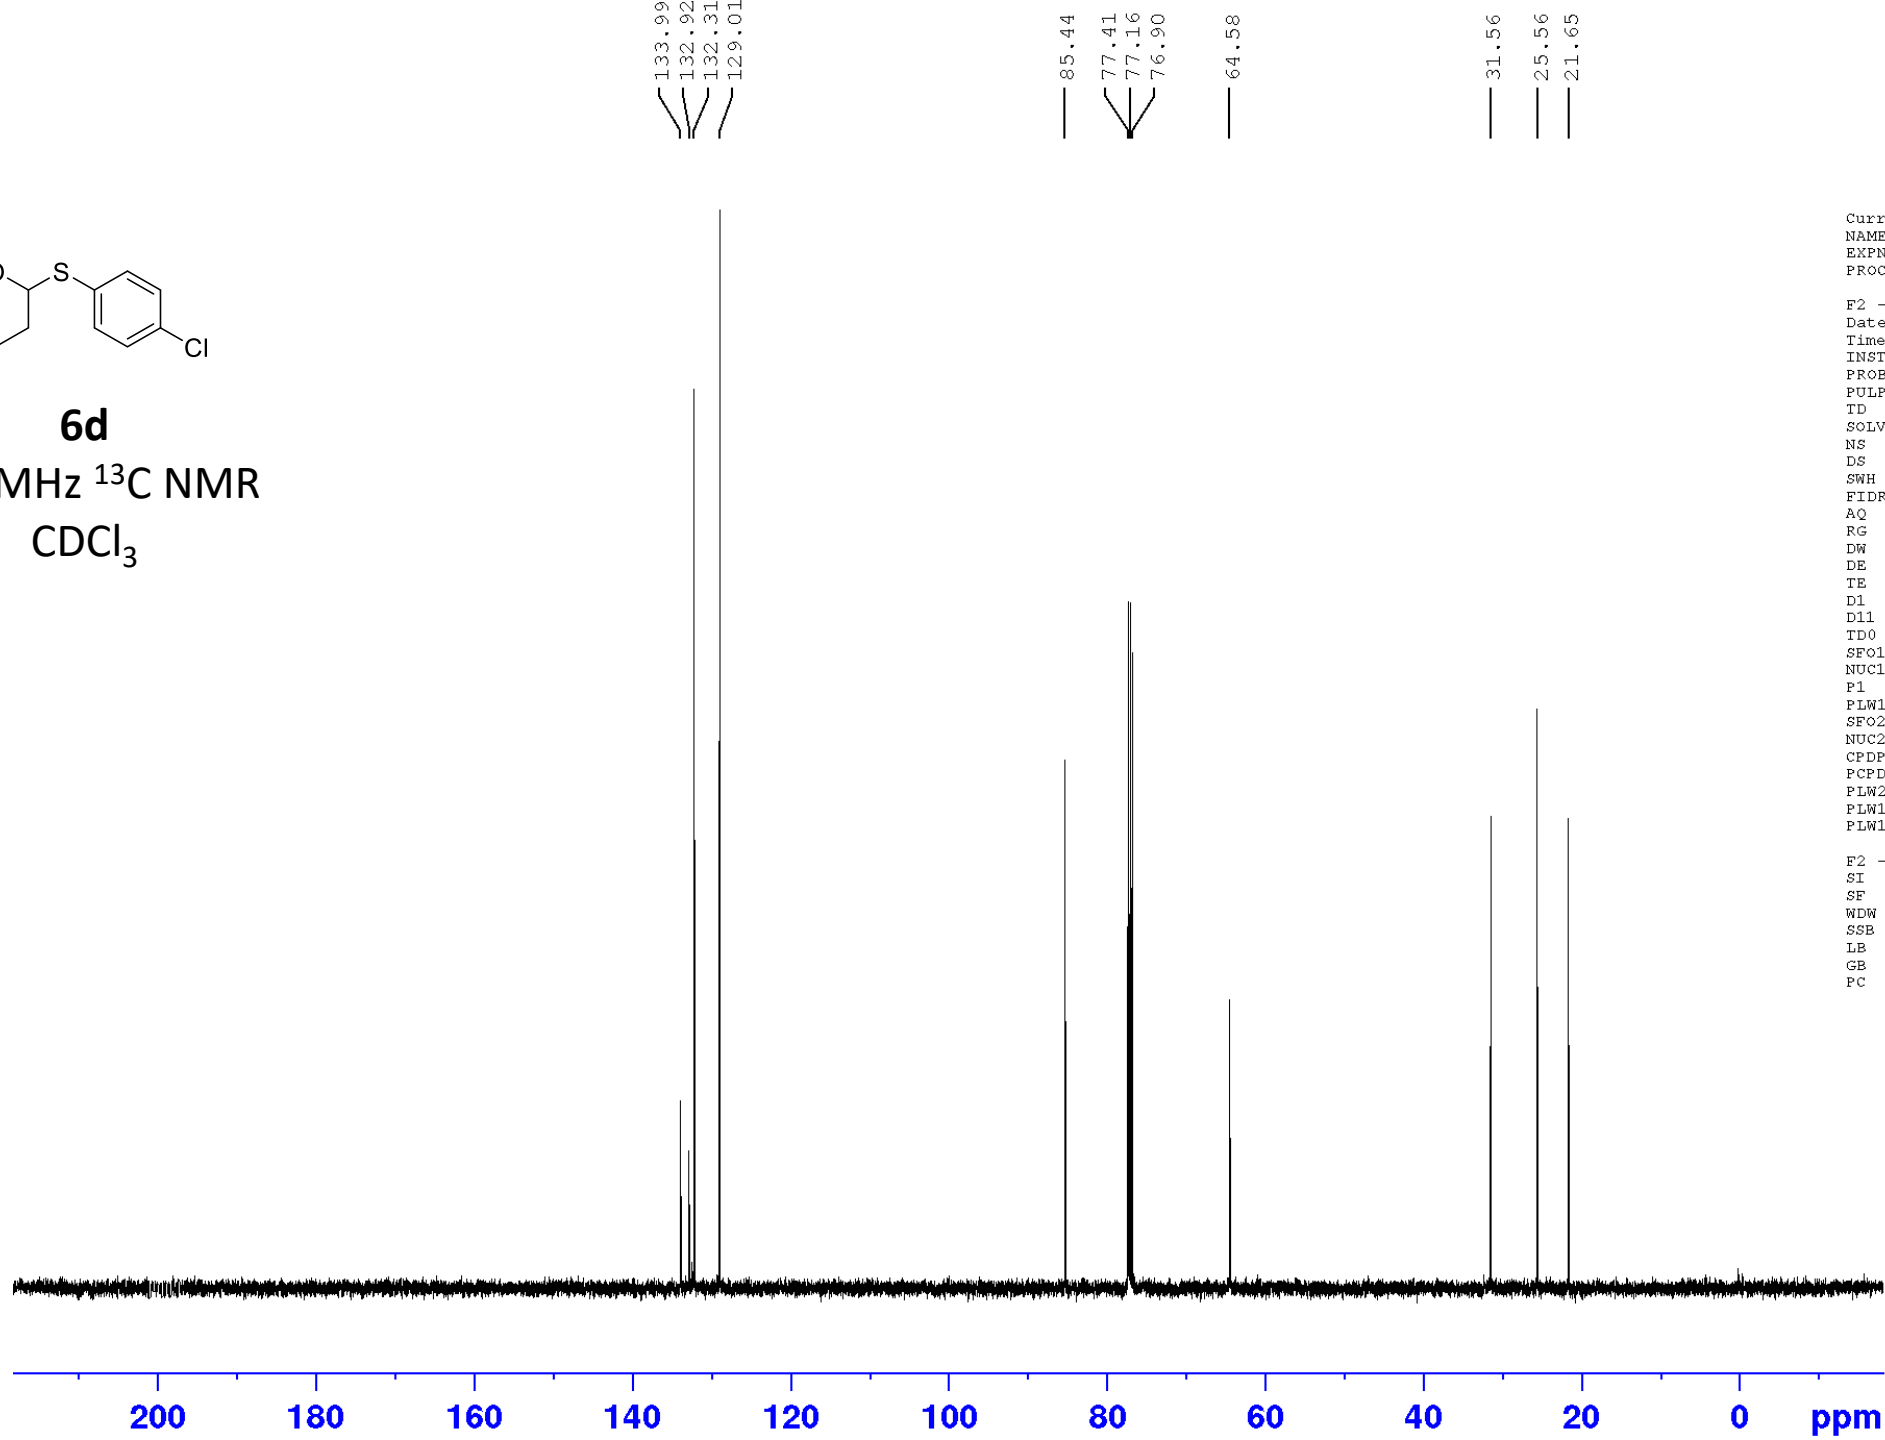

Current Data Parameters  
NAME vinn-4-190-4-isl-20230104  
EXPNO 2  
PROCNO 1

F2 - Acquisition Parameters  
Date\_ 20230104  
Time 15.34 h  
INSTRUM spect  
PROBHD Z119470\_0283 (  
PULPROG zgpg30  
TD 65536  
SOLVENT CDCl3  
NS 50  
DS 4  
SWH 29761.904 Hz  
FIDRES 0.908261 Hz  
AQ 1.1010048 sec  
RG 186.15  
DW 16.800 usec  
DE 6.50 usec  
TE 295.1 K  
D1 2.0000000 sec  
D11 0.0300000 sec  
TD0 1  
SFO1 125.7703643 MHz  
NUC1 13C  
P1 9.75 usec  
PLW1 94.0000000 W  
SFO2 500.1320005 MHz  
NUC2 1H  
CPDPRG[2] waltz16  
PCPD2 80.00 usec  
PLW2 25.0000000 W  
PLW12 0.46495000 W  
PLW13 0.23387000 W

F2 - Processing parameters  
SI 32768  
SF 125.7577768 MHz  
WDW EM  
SSB 0  
LB 1.00 Hz  
GB 0  
PC 1.40

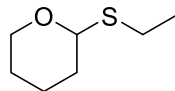

**6e**  
500 MHz <sup>1</sup>H NMR  
CDCl<sub>3</sub>

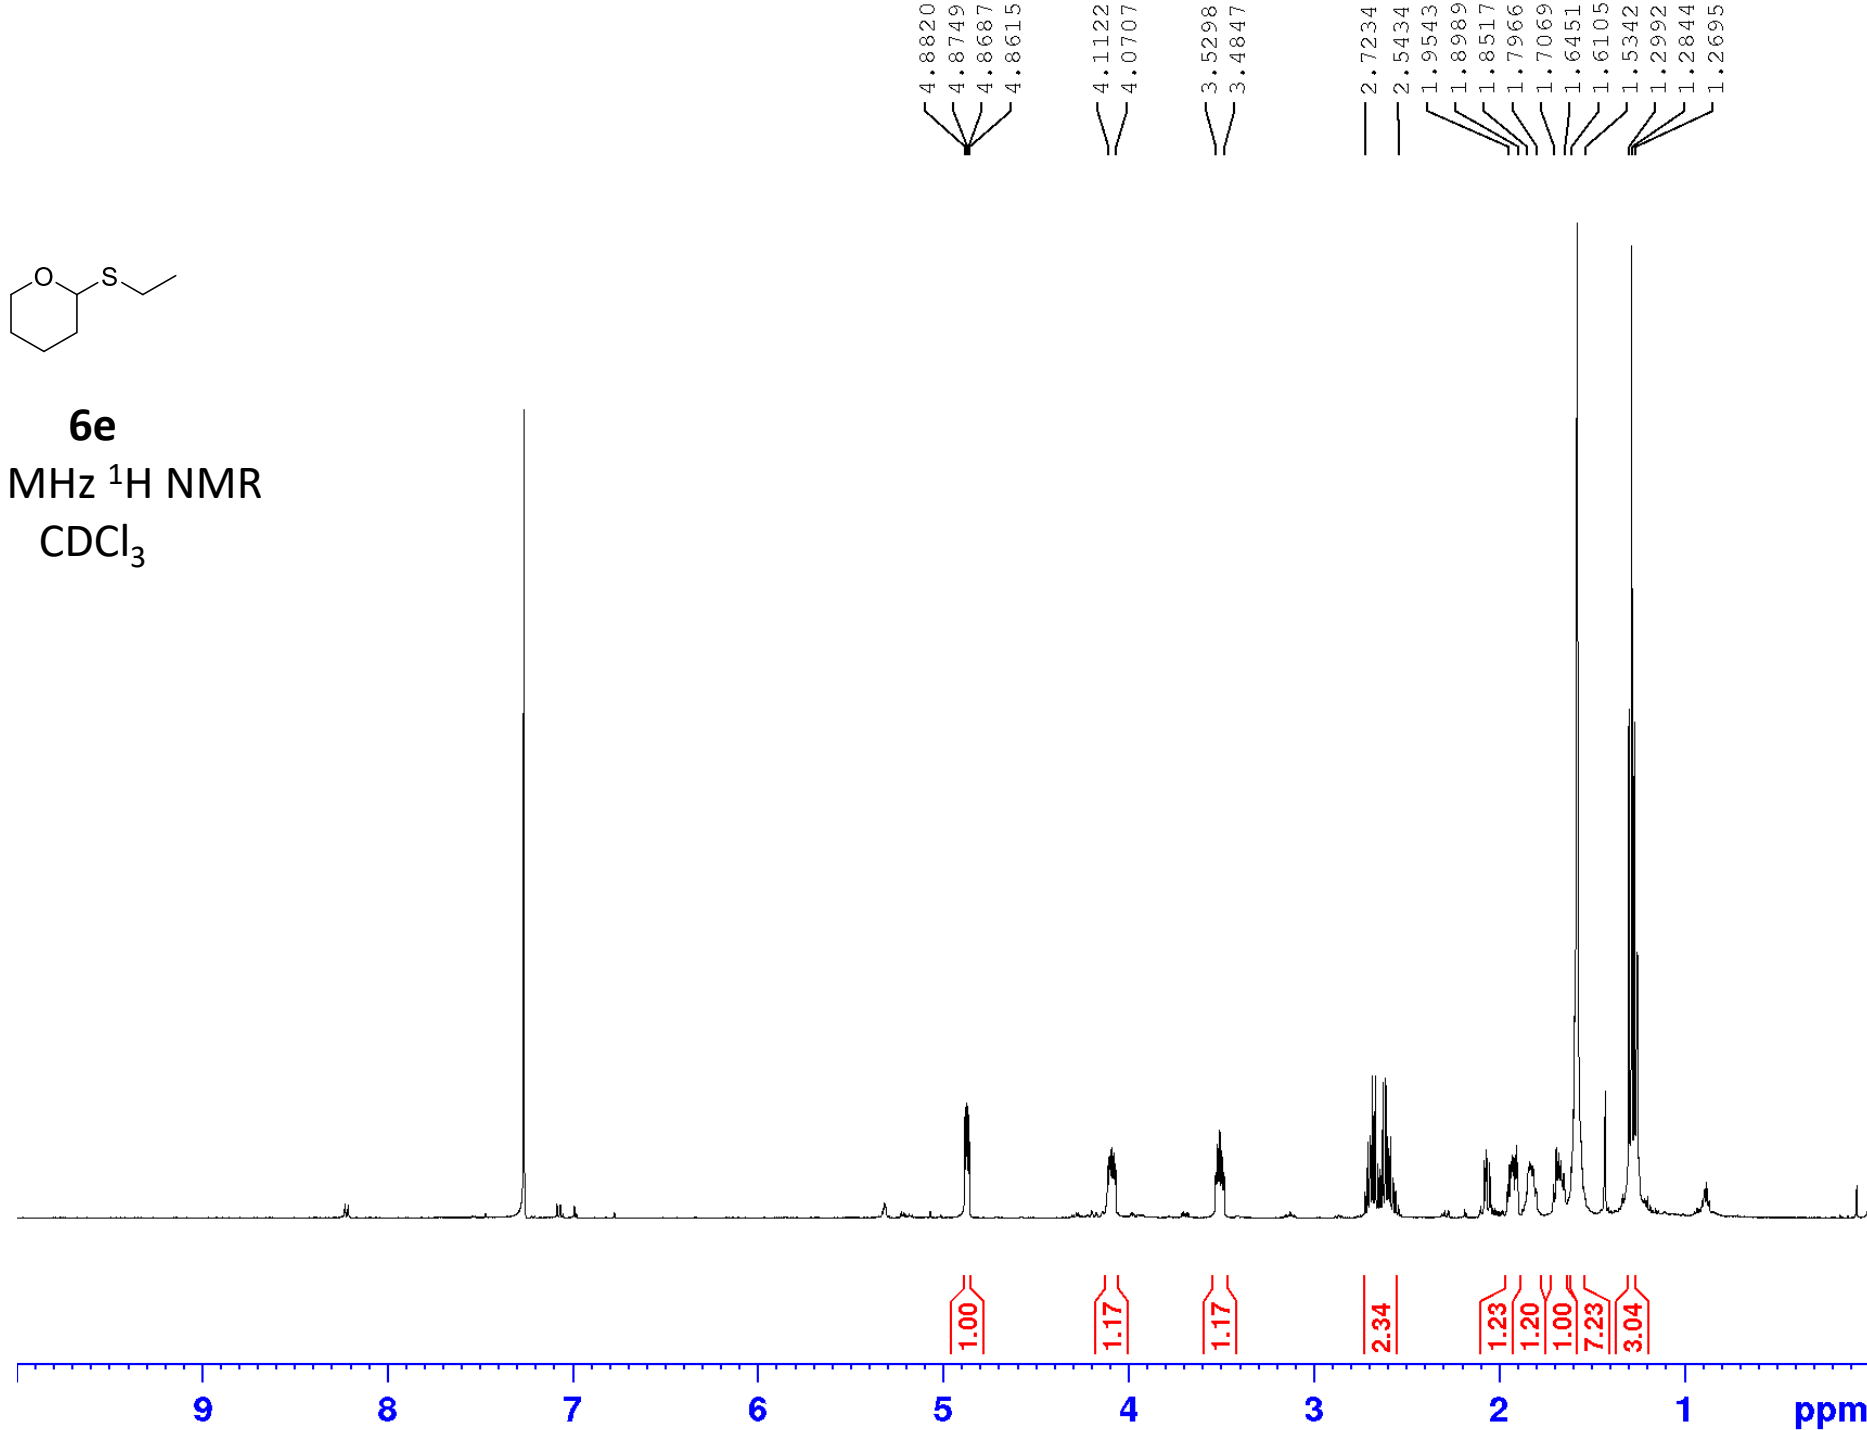

Current Data Parameters  
NAME vinn-4-190-5-isl-20230104  
EXPNO 1  
PROCNO 1

F2 - Acquisition Parameters  
Date\_ 20230104  
Time 15.38 h  
INSTRUM spect  
PROBHD z119470\_0283 {  
PULPROG zg30  
TD 65536  
SOLVENT cdcl3  
NS 16  
DS 2  
SWH 10000.000 Hz  
FIDRES 0.305176 Hz  
AQ 3.2767999 sec  
RG 163.99  
DW 50.000 usec  
DE 6.50 usec  
TE 295.2 K  
D1 1.00000000 sec  
TD0 1  
SFO1 500.1330883 MHz  
NUC1 1H  
P1 10.91 usec  
PLW1 25.00000000 W

F2 - Processing parameters  
SI 65536  
SF 500.1300102 MHz  
WDW EM  
SSB 0  
LB 0.30 Hz  
GB 0  
PC 1.00



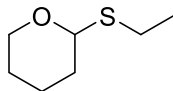

**6e**

125 MHz <sup>13</sup>C NMR  
CDCl<sub>3</sub>

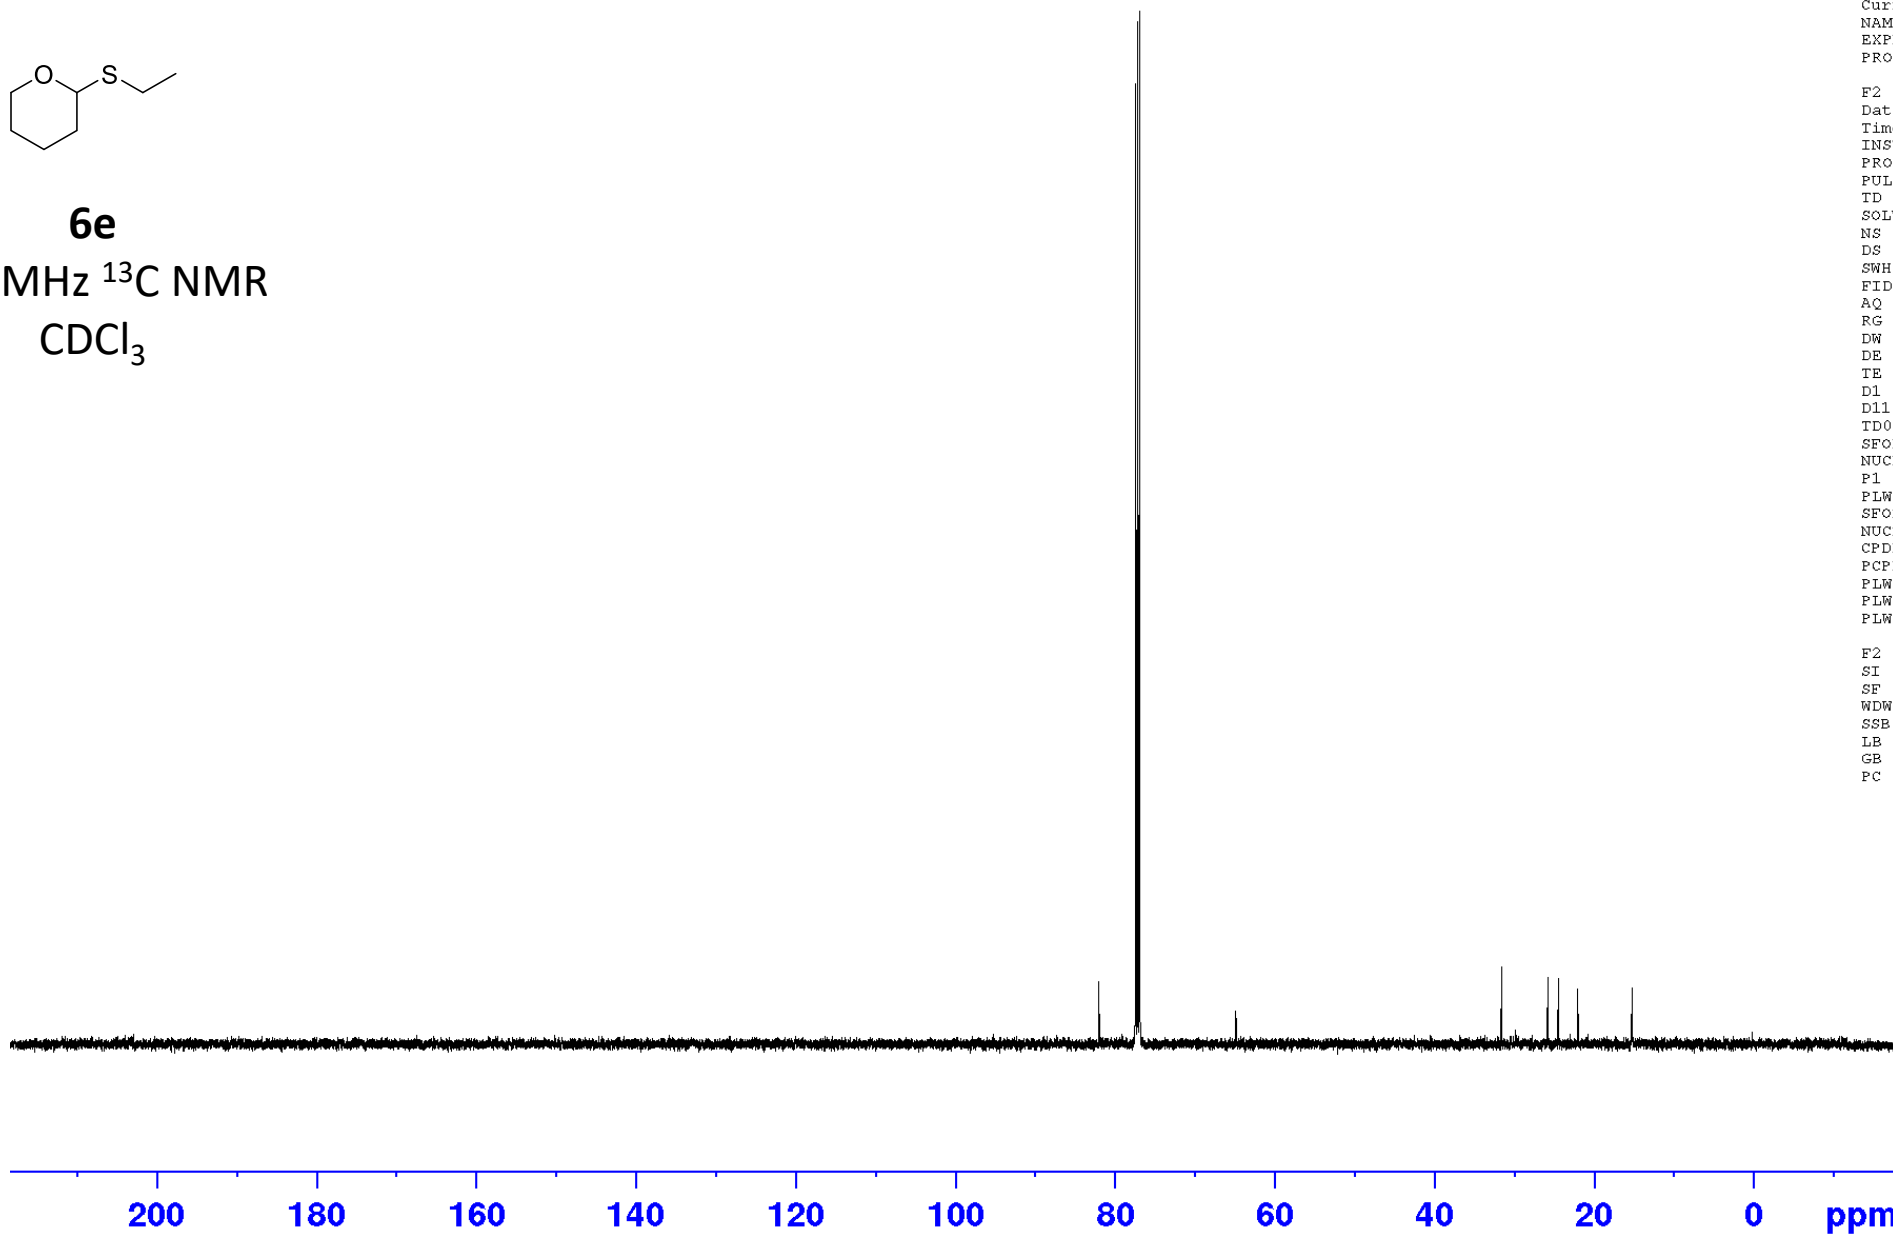

Current Data Parameters  
NAME vinn-4-190-5-isl-20230104  
EXPNO 2  
PROCNO 1

F2 - Acquisition Parameters  
Date\_ 20230104  
Time 15.52 h  
INSTRUM spect  
PROBHD z119470\_0283 (  
PULPROG zgpg30  
TD 65536  
SOLVENT CDCl3  
NS 256  
DS 4  
SWH 29761.904 Hz  
FIDRES 0.908261 Hz  
AQ 1.1010048 sec  
RG 186.15  
DW 16.800 usec  
DE 6.50 usec  
TE 295.2 K  
D1 2.00000000 sec  
D11 0.03000000 sec  
TD0 1  
SFO1 125.7703643 MHz  
NUC1 13C  
P1 9.75 usec  
PLW1 94.00000000 W  
SFO2 500.1320005 MHz  
NUC2 1H  
CPDPRG[2] waltz16  
PCPD2 80.00 usec  
PLW2 25.00000000 W  
PLW12 0.46495000 W  
PLW13 0.23387000 W

F2 - Processing parameters  
SI 32768  
SF 125.7577726 MHz  
WDW EM  
SSB 0  
LB 1.00 Hz  
GB 0  
PC 1.40

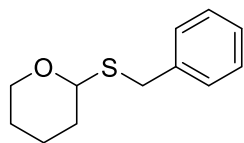

**6f**  
400 MHz <sup>1</sup>H NMR  
CDCl<sub>3</sub>

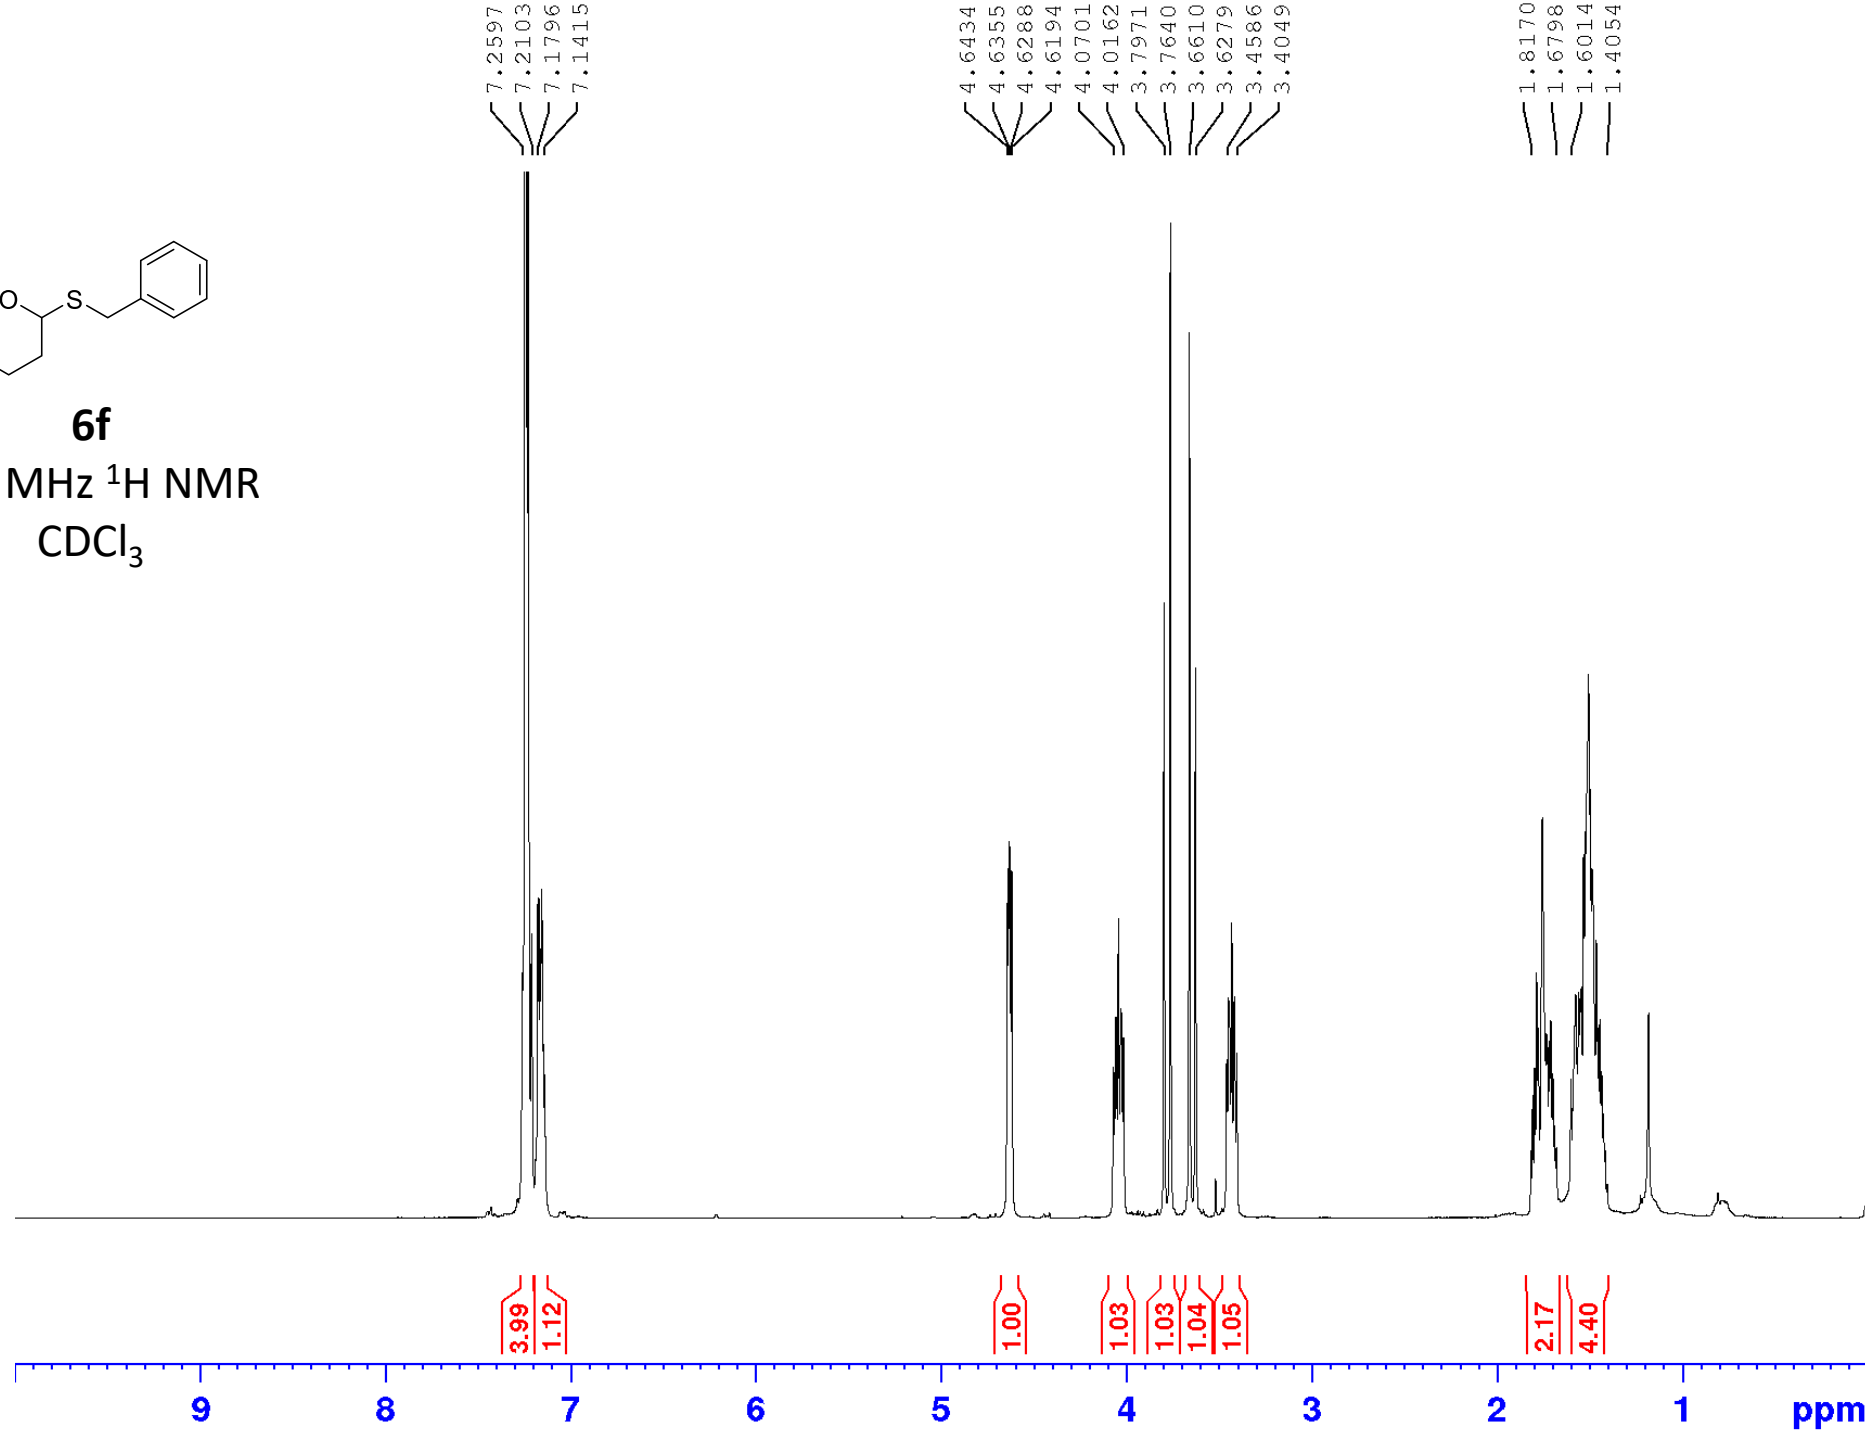

Current Data Parameters  
NAME Andy-181-5-isl-20220817  
EXPNO 6  
PROCNO 1

F2 - Acquisition Parameters  
Date\_ 20220817  
Time 19.22 h  
INSTRUM spect  
PROBHD Z108618\_0257 ( )  
PULPROG zg30  
TD 65536  
SOLVENT CDCl3  
NS 16  
DS 2  
SWH 8012.820 Hz  
FIDRES 0.244532 Hz  
AQ 4.0894465 sec  
RG 80.6  
DW 62.400 usec  
DE 6.50 usec  
TE 295.6 K  
D1 1.00000000 sec  
TDO 1  
SFO1 400.1324708 MHz  
NUC1 1H  
P1 15.00 usec  
PLW1 12.50000000 W

F2 - Processing parameters  
SI 65536  
SF 400.1300429 MHz  
WDW EM  
SSB 0  
LB 0.30 Hz  
GB 0  
PC 1.00



**6f**

100 MHz <sup>13</sup>C NMR  
CDCl<sub>3</sub>

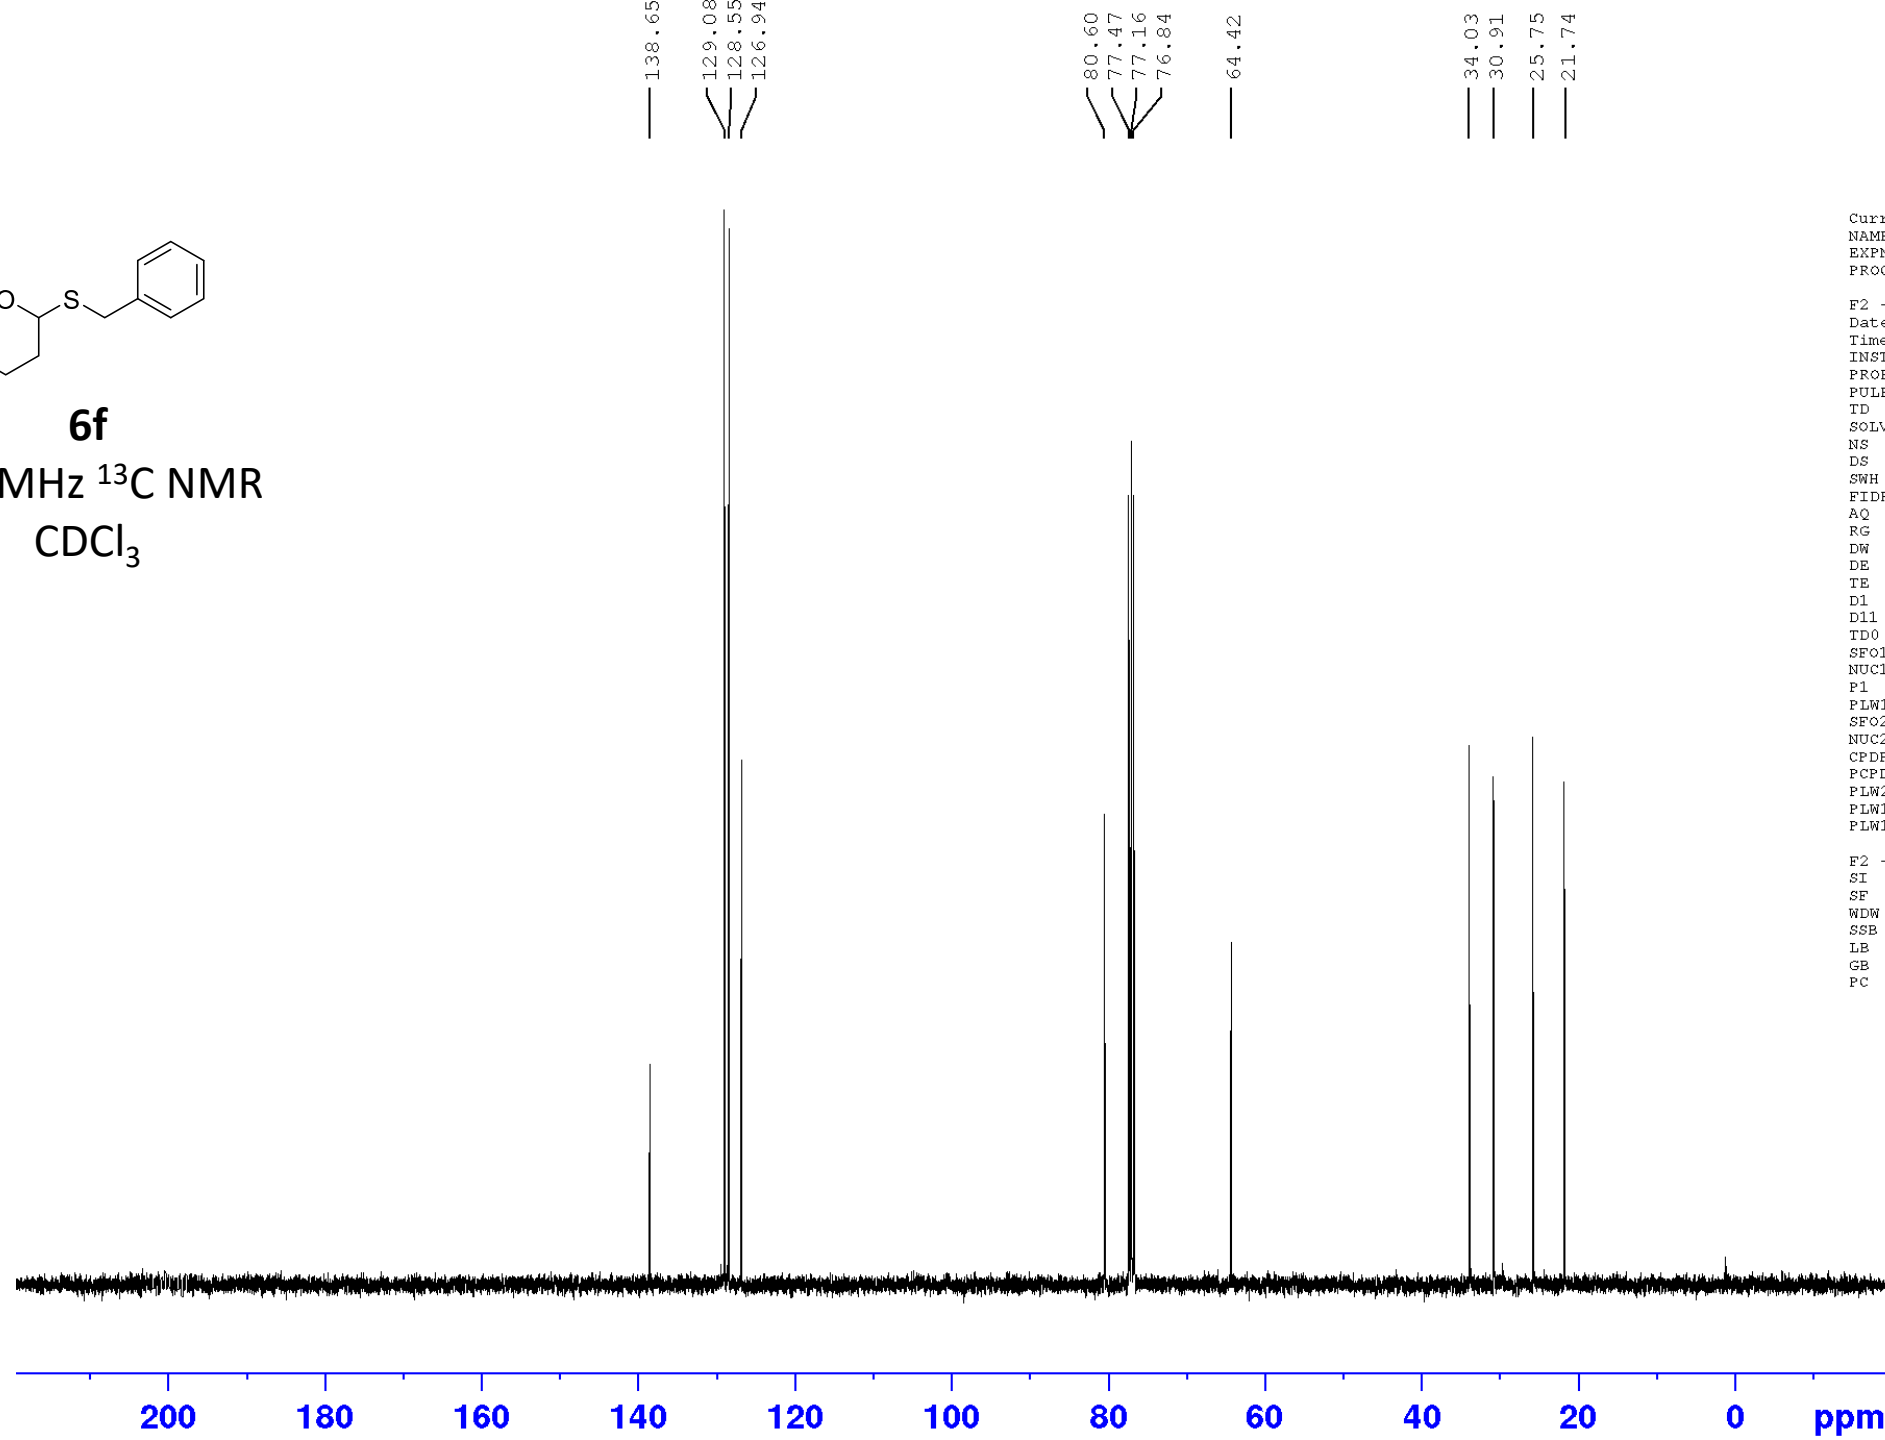

Current Data Parameters  
NAME Andy-181-5-islt-20220817  
EXPNO 7  
PROCNO 1

F2 - Acquisition Parameters  
Date\_ 20220817  
Time 19.30 h  
INSTRUM spect  
PROBHD Z108618\_0257 (  
PULPROG zgpg30  
TD 65536  
SOLVENT CDCl3  
NS 99  
DS 4  
SWH 24038.461 Hz  
FIDRES 0.733596 Hz  
AQ 1.3631488 sec  
RG 203  
DW 20.800 usec  
DE 6.50 usec  
TE 296.2 K  
D1 2.0000000 sec  
D11 0.0300000 sec  
TD0 1  
SFO1 100.6228298 MHz  
NUC1 13C  
P1 10.00 usec  
PLW1 51.0000000 W  
SFO2 400.1316005 MHz  
NUC2 1H  
CPDPRG[2] waltz16  
PCPD2 90.00 usec  
PLW2 12.5000000 W  
PLW12 0.34722000 W  
PLW13 0.17465000 W

F2 - Processing parameters  
SI 32768  
SF 100.6127601 MHz  
WDW EM  
SSB 0  
LB 1.00 Hz  
GB 0  
PC 1.40
